# Supplementary material for: An integrated proteomic and phosphoproteomic analysis reveals α-crystallin A and vitellogenin A1 as key players involved in CLas infection in Diaphorina citri
Source: Research Square preprint supplement (doi:10.21203/rs.3.rs-7919843/v1), 2026-01-30
Supplement: Supplementary file 1 [file b742c0c02ac26b6c112b39cb.xlsx]

## Sheet: A
Protein	Protein Name	Gene Name	Function	ProteinGroup	FastaHeaders	Proteins	Peptides	RazorUniquePeptides	UniquePeptides	Coverage	MolWeight	LFQ intensity infected-1	LFQ intensity infected-2	LFQ intensity infected-3	average B	LFQ intensity free-1	LFQ intensity free-2	LFQ intensity free-3	average A	B/A	t test p value
A0A1S3DJ98	Fatty acyl-CoA reductase	LOC103519469	FUNCTION: Catalyzes the reduction of fatty acyl-CoA to fatty alcohols. {ECO:0000256|RuleBase:RU363097}.	tr|A0A1S3DJ98|A0A1S3DJ98_DIACI	tr|A0A1S3DJ98|A0A1S3DJ98_DIACI Fatty acyl-CoA reductase OS=Diaphorina citri OX=121845 GN=LOC103519469 PE=3 SV=2	1	1	1	1	13.8	16.664		22506	28805	25655.5		514.44	377.42	445.93	57.5326	0.0152591
A0A3Q0JEG6	Uncharacterized protein LOC113471698	LOC113471698		tr|A0A3Q0JEG6|A0A3Q0JEG6_DIACI;tr|A0A1S3D0M2|A0A1S3D0M2_DIACI	tr|A0A3Q0JEG6|A0A3Q0JEG6_DIACI Uncharacterized protein LOC113471698 OS=Diaphorina citri OX=121845 GN=LOC113471698 PE=4 SV=1	2	15	15	10	19.8	103.03	760420	638950	713980	704450	15897	20495	42707	26366.3	26.7178	4.8576e-05
A0A3Q0IYH4	Uncharacterized protein LOC103509026	LOC103509026		tr|A0A3Q0IYH4|A0A3Q0IYH4_DIACI	tr|A0A3Q0IYH4|A0A3Q0IYH4_DIACI Uncharacterized protein LOC103509026 OS=Diaphorina citri OX=121845 GN=LOC103509026 PE=3 SV=1	1	2	2	2	29.9	15.138	414710	701690	1173700	763367	4734.4	72396	34215	37115.1	20.5675	0.0308024
A0A1S3DUV0	Allergen Cr-PI-like	LOC103524177		tr|A0A1S3DUV0|A0A1S3DUV0_DIACI	tr|A0A1S3DUV0|A0A1S3DUV0_DIACI Allergen Cr-PI-like OS=Diaphorina citri OX=121845 GN=LOC103524177 PE=4 SV=1	1	1	1	1	16.4	8.4251	4117500	2302400	2665900	3028600	292510	249790	133600	225300	13.4425	0.00729547
A0A482LPE0	Cytochrome P450 CYP4C4	CYP4C4		tr|A0A482LPE0|A0A482LPE0_DIACI	tr|A0A482LPE0|A0A482LPE0_DIACI Cytochrome P450 CYP4C4 OS=Diaphorina citri OX=121845 GN=CYP4C4 PE=2 SV=1	1	11	11	1	33.5	58.994	1594700	1815800	1592700	1.66773e+06	98933	136500	193480	142971	11.6648	4.24151e-05
A0A482LN23	Cytochrome P450 CYP4g15-2	CYP4g15-2		tr|A0A482LN23|A0A482LN23_DIACI;tr|A0A3Q0IYI8|A0A3Q0IYI8_DIACI	tr|A0A482LN23|A0A482LN23_DIACI Cytochrome P450 CYP4g15-2 OS=Diaphorina citri OX=121845 GN=CYP4g15-2 PE=2 SV=1;tr|A0A3Q0IYI8|A0A3Q0IYI8_DIACI Cytochrome P450 4g15-like OS=Diaphorina citri OX=121845 GN=LOC108252711 PE=3 SV=1	2	12	2	2	29.4	64.326	127810	99242	162310	129787	9930.7	15180	16712	13940.9	9.30982	0.00321845
A0A3Q0JKQ7	Tubulin beta chain	LOC103523737	FUNCTION: Tubulin is the major constituent of microtubules. It binds two moles of GTP, one at an exchangeable site on the beta chain and one at a non-exchangeable site on the alpha chain. {ECO:0000256|RuleBase:RU000352, ECO:0000256|SAAS:SAAS00031082}.	tr|A0A3Q0JKQ7|A0A3Q0JKQ7_DIACI	tr|A0A3Q0JKQ7|A0A3Q0JKQ7_DIACI Tubulin beta chain OS=Diaphorina citri OX=121845 GN=LOC103523737 PE=3 SV=1	1	16	8	8	51.9	50.296	769670	407770	720470	632637	90020	99674	43527	77740.3	8.13782	0.0083992
A0A3Q0ISE2	Uncharacterized protein LOC103508935	LOC103508935		tr|A0A3Q0ISE2|A0A3Q0ISE2_DIACI;tr|A0A3Q0JED0|A0A3Q0JED0_DIACI	tr|A0A3Q0ISE2|A0A3Q0ISE2_DIACI Uncharacterized protein LOC103508935 OS=Diaphorina citri OX=121845 GN=LOC103508935 PE=4 SV=1	2	11	11	11	27.5	73.729	741980	352650	354940	483190	106170	47471	32687	62109.3	7.77967	0.0327031
A0A1S3DSF8	Vitellogenin-1-like	LOC103523874		tr|A0A1S3DSF8|A0A1S3DSF8_DIACI	tr|A0A1S3DSF8|A0A1S3DSF8_DIACI Vitellogenin-1-like OS=Diaphorina citri OX=121845 GN=LOC103523874 PE=4 SV=1	1	13	3	0	41.9	29.992	11452000	5599100	11158000	9.40303e+06	3365900	1334000	274170	1.65802e+06	5.67123	0.0213438
A0A3Q0JFJ1	Uncharacterized protein LOC103520232	LOC103520232		tr|A0A3Q0JFJ1|A0A3Q0JFJ1_DIACI	tr|A0A3Q0JFJ1|A0A3Q0JFJ1_DIACI Uncharacterized protein LOC103520232 OS=Diaphorina citri OX=121845 GN=LOC103520232 PE=4 SV=1	1	4	4	4	8.1	76.107	232790	197580	229120	219830	30916	30190	64868	41991.3	5.23513	0.000372116
A0A1S3D185	LOW QUALITY PROTEIN: uncharacterized protein LOC103509301	LOC103509301		tr|A0A1S3D185|A0A1S3D185_DIACI	tr|A0A1S3D185|A0A1S3D185_DIACI LOW QUALITY PROTEIN: uncharacterized protein LOC103509301 OS=Diaphorina citri OX=121845 GN=LOC103509301 PE=3 SV=2	1	9	9	9	11.2	185.24	2786200	2152100	2079000	2339100	491390	542710	455460	496520	4.71099	0.00123108
A0A1S3DAG9	LYR motif-containing protein 4	LOC103514674		tr|A0A1S3DAG9|A0A1S3DAG9_DIACI	tr|A0A1S3DAG9|A0A1S3DAG9_DIACI LYR motif-containing protein 4 OS=Diaphorina citri OX=121845 GN=LOC103514674 PE=3 SV=1	1	2	2	2	30.1	11.096	114990	121220	114600	116937	3052.1	26001	58466	29173	4.00838	0.00564818
A0A1S3DF48	Deoxyuridine 5-triphosphate nucleotidohydrolase	LOC103516550	FUNCTION: This enzyme is involved in nucleotide metabolism: it produces dUMP, the immediate precursor of thymidine nucleotides and it decreases the intracellular concentration of dUTP so that uracil cannot be incorporated into DNA. {ECO:0000256|RuleBase:RU367024}.	tr|A0A1S3DF48|A0A1S3DF48_DIACI;tr|A0A1S3DDU0|A0A1S3DDU0_DIACI	tr|A0A1S3DF48|A0A1S3DF48_DIACI Deoxyuridine 5-triphosphate nucleotidohydrolase OS=Diaphorina citri OX=121845 GN=LOC103516550 PE=3 SV=1;tr|A0A1S3DDU0|A0A1S3DDU0_DIACI Deoxyuridine 5-triphosphate nucleotidohydrolase OS=Diaphorina citri OX=121845 GN=LOC1035	2	3	3	3	27.5	16.173	108980	101880	179720	130193	68902	12234	17712	32949.3	3.95132	0.033969
A0A1S3DBH5	Cytochrome c oxidase assembly protein COX20, mitochondrial	LOC103514452		tr|A0A1S3DBH5|A0A1S3DBH5_DIACI;tr|A0A1S3DTB7|A0A1S3DTB7_DIACI	tr|A0A1S3DBH5|A0A1S3DBH5_DIACI Cytochrome c oxidase assembly protein COX20, mitochondrial OS=Diaphorina citri OX=121845 GN=LOC103514452 PE=3 SV=1;tr|A0A1S3DTB7|A0A1S3DTB7_DIACI Cytochrome c oxidase assembly protein COX20, mitochondrial OS=Diaphorina citri	2	2	2	2	22.6	13.084	207770	147800	134980	163517		36893	46485	41689	3.9223	0.0250282
A0A1S4EIK4	alkaline phosphatase	LOC103515206		tr|A0A1S4EIK4|A0A1S4EIK4_DIACI	tr|A0A1S4EIK4|A0A1S4EIK4_DIACI alkaline phosphatase OS=Diaphorina citri OX=121845 GN=LOC103515206 PE=3 SV=1	1	3	3	3	21.3	27.018		115250	97367	106308	11103	50341	21845	27763	3.82914	0.0176532
A0A3Q0JK51	Vitellogenin-A1-like	LOC103523199		tr|A0A3Q0JK51|A0A3Q0JK51_DIACI;tr|A0A3Q0J235|A0A3Q0J235_DIACI	tr|A0A3Q0JK51|A0A3Q0JK51_DIACI Vitellogenin-A1-like OS=Diaphorina citri OX=121845 GN=LOC103523199 PE=4 SV=1	2	36	36	33	46.8	170.12	205020000	94780000	152600000	150800000	82552000	30419000	7625200	4.01987e+07	3.75136	0.0463636
A0A1S3DHL6	phosphoenolpyruvate carboxykinase (GTP)	LOC103518761		tr|A0A1S3DHL6|A0A1S3DHL6_DIACI;tr|A0A3Q0JCX1|A0A3Q0JCX1_DIACI;tr|A0A3Q0JHS9|A0A3Q0JHS9_DIACI;tr|A0A1S3DJ67|A0A1S3DJ67_DIACI	tr|A0A1S3DHL6|A0A1S3DHL6_DIACI phosphoenolpyruvate carboxykinase (GTP) OS=Diaphorina citri OX=121845 GN=LOC103518761 PE=3 SV=1;tr|A0A3Q0JCX1|A0A3Q0JCX1_DIACI phosphoenolpyruvate carboxykinase (GTP) OS=Diaphorina citri OX=121845 GN=LOC103518761 PE=3 SV=1;tr	4	19	19	18	51	71.503	1092000	1361400	1115600	1.18967e+06	267090	352150	387610	335617	3.54472	0.000789443
A0A3Q0JJ98	Uncharacterized protein LOC113471697	LOC113471697		tr|A0A3Q0JJ98|A0A3Q0JJ98_DIACI	tr|A0A3Q0JJ98|A0A3Q0JJ98_DIACI Uncharacterized protein LOC113471697 OS=Diaphorina citri OX=121845 GN=LOC113471697 PE=4 SV=1	1	8	3	3	17.4	62.646	203120	184200	150490	179270	85506	57209	17086	53267	3.3655	0.00740353
A0A3Q0JNT2	Uncharacterized protein LOC113473488	LOC113473488		tr|A0A3Q0JNT2|A0A3Q0JNT2_DIACI	tr|A0A3Q0JNT2|A0A3Q0JNT2_DIACI Uncharacterized protein LOC113473488 OS=Diaphorina citri OX=121845 GN=LOC113473488 PE=4 SV=1	1	1	1	1	8.4	18.684	168780	100680	117450	128970	65346	1120.2	55040	40502.1	3.18428	0.0363421
A0A3Q0IRC3	H/ACA ribonucleoprotein complex subunit	LOC103505897	FUNCTION: Required for ribosome biogenesis. Part of a complex which catalyzes pseudouridylation of rRNA. This involves the isomerization of uridine such that the ribose is subsequently attached to C5, instead of the normal N1. Pseudouridine ("psi") residues may serve to stabilize the conformation of rRNAs. {ECO:0000256|RuleBase:RU364004}.	tr|A0A3Q0IRC3|A0A3Q0IRC3_DIACI	tr|A0A3Q0IRC3|A0A3Q0IRC3_DIACI H/ACA ribonucleoprotein complex subunit OS=Diaphorina citri OX=121845 GN=LOC103505897 PE=3 SV=1	1	2	2	2	12.3	21.821	210210	158850	222250	197103	103640	75460	11447	63515.7	3.10322	0.0162871
A0A1S3D1B8	Uncharacterized protein LOC103509396 isoform X1	LOC103509396		tr|A0A1S3D1B8|A0A1S3D1B8_DIACI	tr|A0A1S3D1B8|A0A1S3D1B8_DIACI Uncharacterized protein LOC103509396 isoform X1 OS=Diaphorina citri OX=121845 GN=LOC103509396 PE=4 SV=1	1	4	4	4	11.4	72.797	21486	18947	27700	22711	5370.7		9383.1	7376.9	3.07866	0.025055
A0A3Q0JGB5	Eukaryotic peptide chain release factor subunit 1	LOC103520551		tr|A0A3Q0JGB5|A0A3Q0JGB5_DIACI	tr|A0A3Q0JGB5|A0A3Q0JGB5_DIACI Eukaryotic peptide chain release factor subunit 1 OS=Diaphorina citri OX=121845 GN=LOC103520551 PE=4 SV=1	1	5	5	4	25.9	45.01	296070	165590	194140	218600	77263	39436	96652	71117	3.07381	0.0265751
A0A3Q0IQT3	1-acylglycerol-3-phosphate O-acyltransferase ABHD5	LOC103506011		tr|A0A3Q0IQT3|A0A3Q0IQT3_DIACI	tr|A0A3Q0IQT3|A0A3Q0IQT3_DIACI 1-acylglycerol-3-phosphate O-acyltransferase ABHD5 OS=Diaphorina citri OX=121845 GN=LOC103506011 PE=4 SV=1	1	1	1	1	2.9	34.901	34502	42342	45818	40887.3	12680	19180	9308.1	13722.7	2.97954	0.00357374
A0A3Q0JDB0	UTP--glucose-1-phosphate uridylyltransferase-like	LOC103516544		tr|A0A3Q0JDB0|A0A3Q0JDB0_DIACI	tr|A0A3Q0JDB0|A0A3Q0JDB0_DIACI UTP--glucose-1-phosphate uridylyltransferase-like OS=Diaphorina citri OX=121845 GN=LOC103516544 PE=4 SV=1	1	5	1	1	41.7	13.809	1037000	601500	867020	835173	341460	289640	247040	292713	2.85321	0.0138658
A0A1S4EAI5	Uncharacterized protein LOC103508453 isoform X1	LOC103508453		tr|A0A1S4EAI5|A0A1S4EAI5_DIACI	tr|A0A1S4EAI5|A0A1S4EAI5_DIACI Uncharacterized protein LOC103508453 isoform X1 OS=Diaphorina citri OX=121845 GN=LOC103508453 PE=4 SV=1	1	1	1	1	6.4	42.365	46362	34157	46484	42334.3	11861	20247	13301	15136.3	2.79687	0.00492816
A0A3Q0J822	Uncharacterized protein LOC103516416	LOC103516416		tr|A0A3Q0J822|A0A3Q0J822_DIACI	tr|A0A3Q0J822|A0A3Q0J822_DIACI Uncharacterized protein LOC103516416 OS=Diaphorina citri OX=121845 GN=LOC103516416 PE=4 SV=1	1	2	2	2	25.7	16.102	87734	108530	148480	114915	22777	63671	37519	41322.3	2.78093	0.026566
A0A1S3DLZ6	2-hydroxyacyl-CoA lyase 1-like	LOC103521234		tr|A0A1S3DLZ6|A0A1S3DLZ6_DIACI;tr|A0A3Q0J6H4|A0A3Q0J6H4_DIACI	tr|A0A1S3DLZ6|A0A1S3DLZ6_DIACI 2-hydroxyacyl-CoA lyase 1-like OS=Diaphorina citri OX=121845 GN=LOC103521234 PE=4 SV=1;tr|A0A3Q0J6H4|A0A3Q0J6H4_DIACI 2-hydroxyacyl-CoA lyase 1 OS=Diaphorina citri OX=121845 GN=LOC103515657 PE=3 SV=1	2	2	2	2	17.1	23.398	116760	59053	69345	81719.3	35372	24874	28636	29627.3	2.75824	0.0446269
A0A1S4ELT7	LOW QUALITY PROTEIN: clustered mitochondria protein homolog	LOC103517974		tr|A0A1S4ELT7|A0A1S4ELT7_DIACI	tr|A0A1S4ELT7|A0A1S4ELT7_DIACI LOW QUALITY PROTEIN: clustered mitochondria protein homolog OS=Diaphorina citri OX=121845 GN=LOC103517974 PE=4 SV=1	1	9	9	9	11.3	161.76	232000	313070	241030	262033	33630	127150	126840	95873.3	2.73312	0.0146129
A0A3Q0JCE7	Vitellogenic carboxypeptidase-like	LOC113470289		tr|A0A3Q0JCE7|A0A3Q0JCE7_DIACI	tr|A0A3Q0JCE7|A0A3Q0JCE7_DIACI Vitellogenic carboxypeptidase-like OS=Diaphorina citri OX=121845 GN=LOC113470289 PE=3 SV=1	1	2	2	2	35.6	11.525	141610	121280	138150	133680	2626.9	71089	74553	49423	2.70482	0.0254679
A0A1S4EQQ6	Muscle M-line assembly protein unc-89-like	LOC103521536		tr|A0A1S4EQQ6|A0A1S4EQQ6_DIACI	tr|A0A1S4EQQ6|A0A1S4EQQ6_DIACI Muscle M-line assembly protein unc-89-like OS=Diaphorina citri OX=121845 GN=LOC103521536 PE=4 SV=2	1	2	2	2	11.3	59.639	216210	161310	185960	187827	126940	42029	39871	69613.3	2.69814	0.0226143
A0A1S3DD71	Cytochrome P450 6k1-like isoform X1	LOC103516112		tr|A0A1S3DD71|A0A1S3DD71_DIACI;tr|A0A1S3DEB7|A0A1S3DEB7_DIACI	tr|A0A1S3DD71|A0A1S3DD71_DIACI Cytochrome P450 6k1-like isoform X1 OS=Diaphorina citri OX=121845 GN=LOC103516112 PE=3 SV=1;tr|A0A1S3DEB7|A0A1S3DEB7_DIACI Cytochrome P450 6k1-like isoform X2 OS=Diaphorina citri OX=121845 GN=LOC103516112 PE=3 SV=1	2	5	4	4	13.6	58.11	156790	99423	107710	121308	43351	48541	44101	45331	2.67604	0.013404
A0A3Q0IQR1	ATP-dependent RNA helicase glh-2-like	LOC103508163		tr|A0A3Q0IQR1|A0A3Q0IQR1_DIACI	tr|A0A3Q0IQR1|A0A3Q0IQR1_DIACI ATP-dependent RNA helicase glh-2-like OS=Diaphorina citri OX=121845 GN=LOC103508163 PE=4 SV=1	1	7	7	3	21.5	60.119	760260	403620	535020	566300	220720	148020	270130	212957	2.65923	0.0325269
A0A1S3DFR7	Uncharacterized protein LOC103516893 isoform X1	LOC103516893		tr|A0A1S3DFR7|A0A1S3DFR7_DIACI	tr|A0A1S3DFR7|A0A1S3DFR7_DIACI Uncharacterized protein LOC103516893 isoform X1 OS=Diaphorina citri OX=121845 GN=LOC103516893 PE=4 SV=1	1	2	2	2	6.3	44.141	85608	84465	52874	74315.7	28534	21738	34105	28125.7	2.64227	0.0150324
A0A1S3D016	Phosphatidylglycerophosphatase and protein-tyrosine phosphatase 1-like	LOC103508604		tr|A0A1S3D016|A0A1S3D016_DIACI	tr|A0A1S3D016|A0A1S3D016_DIACI Phosphatidylglycerophosphatase and protein-tyrosine phosphatase 1-like OS=Diaphorina citri OX=121845 GN=LOC103508604 PE=4 SV=1	1	3	3	3	21.5	22.125	110690	84068	95085	96614.3	21960	54900	35598	37486	2.57734	0.00856981
A0A3Q0J700	Casein kinase II subunit alpha	LOC103513842		tr|A0A3Q0J700|A0A3Q0J700_DIACI	tr|A0A3Q0J700|A0A3Q0J700_DIACI Casein kinase II subunit alpha OS=Diaphorina citri OX=121845 GN=LOC103513842 PE=4 SV=1	1	4	2	2	33.1	15.628	125110	128570	136160	129947	29905	62988	58530	50474.3	2.57451	0.00185933
A0A1S3DL80	Chloride channel protein	LOC103520826		tr|A0A1S3DL80|A0A1S3DL80_DIACI;tr|A0A3Q0IP45|A0A3Q0IP45_DIACI	tr|A0A1S3DL80|A0A1S3DL80_DIACI Chloride channel protein OS=Diaphorina citri OX=121845 GN=LOC103520826 PE=3 SV=1	2	3	3	3	6.2	96.723	206730	116120	139370	154073	62191	41791	77313	60431.7	2.54955	0.0321891
A0A1S3D7B6	Alpha-crystallin A chain-like	LOC103512951		tr|A0A1S3D7B6|A0A1S3D7B6_DIACI;tr|A0A3Q0JF24|A0A3Q0JF24_DIACI	tr|A0A1S3D7B6|A0A1S3D7B6_DIACI Alpha-crystallin A chain-like OS=Diaphorina citri OX=121845 GN=LOC103512951 PE=3 SV=1	2	7	7	7	44.4	21.157	4248000	3436400	3245200	3643200	1864000	1292200	1151200	1435800	2.5374	0.00423781
A0A3Q0IJQ3	Protein arginine N-methyltransferase 1	LOC103505342		tr|A0A3Q0IJQ3|A0A3Q0IJQ3_DIACI;tr|A0A3Q0JJN6|A0A3Q0JJN6_DIACI	tr|A0A3Q0IJQ3|A0A3Q0IJQ3_DIACI Protein arginine N-methyltransferase 1 OS=Diaphorina citri OX=121845 GN=LOC103505342 PE=4 SV=1;tr|A0A3Q0JJN6|A0A3Q0JJN6_DIACI Protein arginine N-methyltransferase 1-like OS=Diaphorina citri OX=121845 GN=LOC103522909 PE=4 SV=1	2	10	10	10	41.6	37.753	613930	397290	631450	547557	202010	232170	216610	216930	2.52412	0.0120477
A0A3Q0IIZ6	E3 ubiquitin ligase PARAQUAT TOLERANCE 3-like	LOC103504974		tr|A0A3Q0IIZ6|A0A3Q0IIZ6_DIACI	tr|A0A3Q0IIZ6|A0A3Q0IIZ6_DIACI E3 ubiquitin ligase PARAQUAT TOLERANCE 3-like OS=Diaphorina citri OX=121845 GN=LOC103504974 PE=4 SV=1	1	8	8	8	29.4	66.359	2019300	1430900	1383900	1.61137e+06	1033600	659120	302990	665237	2.42225	0.0322478
A0A3Q0IUX8	Fatty-acid amide hydrolase 2-A	LOC103510134		tr|A0A3Q0IUX8|A0A3Q0IUX8_DIACI	tr|A0A3Q0IUX8|A0A3Q0IUX8_DIACI Fatty-acid amide hydrolase 2-A OS=Diaphorina citri OX=121845 GN=LOC103510134 PE=4 SV=1	1	4	4	4	11.2	60.937	178420	208150	173510	186693	67978	84871	78387	77078.7	2.42211	0.000768682
A0A3Q0J3G3	Protein takeout-like	LOC103514189		tr|A0A3Q0J3G3|A0A3Q0J3G3_DIACI	tr|A0A3Q0J3G3|A0A3Q0J3G3_DIACI Protein takeout-like OS=Diaphorina citri OX=121845 GN=LOC103514189 PE=4 SV=1	1	5	5	5	36.4	24.805	743510	445740	540610	576620	143520	283300	289580	238800	2.41466	0.0277707
A0A3Q0IYF1	Cytochrome P450 4g15	LOC103511829		tr|A0A3Q0IYF1|A0A3Q0IYF1_DIACI;tr|G9DDT2|G9DDT2_DIACI	tr|A0A3Q0IYF1|A0A3Q0IYF1_DIACI Cytochrome P450 4g15 OS=Diaphorina citri OX=121845 GN=LOC103511829 PE=3 SV=1	2	14	2	1	33.6	67.157	236120	150070	298810	228333	105680	103400	76735	95271.7	2.39666	0.0392779
A0A1S3DS17	Methyl farnesoate epoxidase	LOC103523306		tr|A0A1S3DS17|A0A1S3DS17_DIACI;tr|A0A3Q0IQA7|A0A3Q0IQA7_DIACI;tr|A0A1S3DRW0|A0A1S3DRW0_DIACI	tr|A0A1S3DS17|A0A1S3DS17_DIACI Methyl farnesoate epoxidase OS=Diaphorina citri OX=121845 GN=LOC103523306 PE=3 SV=1;tr|A0A3Q0IQA7|A0A3Q0IQA7_DIACI Farnesoate epoxidase-like OS=Diaphorina citri OX=121845 GN=LOC103505370 PE=3 SV=1	3	8	8	6	35.8	34.892	958350	832230	994050	928210	375640	430320	357980	387980	2.39242	0.000548999
A0A1S4EFI5	RNA helicase	LOC103512236		tr|A0A1S4EFI5|A0A1S4EFI5_DIACI	tr|A0A1S4EFI5|A0A1S4EFI5_DIACI RNA helicase OS=Diaphorina citri OX=121845 GN=LOC103512236 PE=4 SV=1	1	5	4	4	8.7	97.968	287490	152120	197970	212527	104300	104160	64072	90844	2.33947	0.0440686
A0A1S3CV51	Sphingosine-1-phosphate lyase	LOC103505843		tr|A0A1S3CV51|A0A1S3CV51_DIACI	tr|A0A1S3CV51|A0A1S3CV51_DIACI Sphingosine-1-phosphate lyase OS=Diaphorina citri OX=121845 GN=LOC103505843 PE=3 SV=1	1	7	7	7	18.9	62.946	348160	215070	219330	260853	124610	106440	110510	113853	2.29113	0.0288445
A0A1S3DEQ4	Cathepsin W-like	LOC103517126		tr|A0A1S3DEQ4|A0A1S3DEQ4_DIACI	tr|A0A1S3DEQ4|A0A1S3DEQ4_DIACI Cathepsin W-like OS=Diaphorina citri OX=121845 GN=LOC103517126 PE=3 SV=1	1	4	4	3	30.3	21.182	3066000	1791300	2506100	2.45447e+06	1302800	988860	978230	1.08996e+06	2.25188	0.0237133
A0A0A7DNM0	Glycerol-3-phosphate dehydrogenase (Fragment)			tr|A0A0A7DNM0|A0A0A7DNM0_DIACI	tr|A0A0A7DNM0|A0A0A7DNM0_DIACI Glycerol-3-phosphate dehydrogenase (Fragment) OS=Diaphorina citri OX=121845 PE=2 SV=1	1	8	3	3	63.1	15.385	5951200	3653100	3542300	4382200	1713500	2146000	2004400	1.95463e+06	2.24196	0.0379545
A0A3Q0JJ11	Mitochondrial proton/calcium exchanger protein-like	LOC103522419		tr|A0A3Q0JJ11|A0A3Q0JJ11_DIACI	tr|A0A3Q0JJ11|A0A3Q0JJ11_DIACI Mitochondrial proton/calcium exchanger protein-like OS=Diaphorina citri OX=121845 GN=LOC103522419 PE=4 SV=1	1	4	4	4	25.1	22.44	716490	549570	502010	589357	239050	288720	262890	263553	2.2362	0.00808868
A0A1S3DQ92	5-demethoxyubiquinone hydroxylase, mitochondrial-like	LOC103522045		tr|A0A1S3DQ92|A0A1S3DQ92_DIACI	tr|A0A1S3DQ92|A0A1S3DQ92_DIACI 5-demethoxyubiquinone hydroxylase, mitochondrial-like OS=Diaphorina citri OX=121845 GN=LOC103522045 PE=4 SV=1	1	3	3	1	44.4	15.099	205350	234600	195550	211833	54440	108920	121920	95093.3	2.22764	0.00797509
A0A3Q0J9X0	Cullin-1-like	LOC103514868		tr|A0A3Q0J9X0|A0A3Q0J9X0_DIACI;tr|A0A1S3DER0|A0A1S3DER0_DIACI	tr|A0A3Q0J9X0|A0A3Q0J9X0_DIACI Cullin-1-like OS=Diaphorina citri OX=121845 GN=LOC103514868 PE=3 SV=1;tr|A0A1S3DER0|A0A1S3DER0_DIACI Cullin homolog 1-like OS=Diaphorina citri OX=121845 GN=LOC103516948 PE=4 SV=1	2	3	3	2	8.6	70.813	99872	64992	77050	80638	25237	34670	49152	36353	2.21819	0.0231561
A0A1S3CVD4	ATP-binding cassette sub-family F member 2	LOC103505241		tr|A0A1S3CVD4|A0A1S3CVD4_DIACI	tr|A0A1S3CVD4|A0A1S3CVD4_DIACI ATP-binding cassette sub-family F member 2 OS=Diaphorina citri OX=121845 GN=LOC103505241 PE=2 SV=1	1	10	10	10	22.6	71.085	1241600	1039200	1205100	1.16197e+06	437260	524850	610280	524130	2.21694	0.0013306
A0A1S3D0D6	ATP synthase mitochondrial F1 complex assembly factor 2	LOC103508824		tr|A0A1S3D0D6|A0A1S3D0D6_DIACI	tr|A0A1S3D0D6|A0A1S3D0D6_DIACI ATP synthase mitochondrial F1 complex assembly factor 2 OS=Diaphorina citri OX=121845 GN=LOC103508824 PE=3 SV=1	1	3	3	3	14.3	32.912	75631	42637	68636	62301.3	26176	37710	22170	28685.3	2.17189	0.0384819
A0A3Q0IWN3	Hydroxysteroid dehydrogenase-like protein 1	LOC103510829		tr|A0A3Q0IWN3|A0A3Q0IWN3_DIACI;tr|A0A3Q0J1K8|A0A3Q0J1K8_DIACI	tr|A0A3Q0IWN3|A0A3Q0IWN3_DIACI Hydroxysteroid dehydrogenase-like protein 1 OS=Diaphorina citri OX=121845 GN=LOC103510829 PE=3 SV=1;tr|A0A3Q0J1K8|A0A3Q0J1K8_DIACI Hydroxysteroid dehydrogenase-like protein 1 OS=Diaphorina citri OX=121845 GN=LOC103510839 PE=3	2	2	2	2	10	21.905	167930	117800	97872	127867	50862	60197	66159	59072.7	2.16458	0.0320329
A0A3Q0JAE4	dolichyl-diphosphooligosaccharide--protein glycotransferase	LOC103515080		tr|A0A3Q0JAE4|A0A3Q0JAE4_DIACI	tr|A0A3Q0JAE4|A0A3Q0JAE4_DIACI dolichyl-diphosphooligosaccharide--protein glycotransferase OS=Diaphorina citri OX=121845 GN=LOC103515080 PE=3 SV=1	1	5	5	4	7.7	79.329	361100	190460	269410	273657	103870	164020	113240	127043	2.15404	0.0497875
A0A1S3CVI1	60S ribosomal protein L21	LOC103505979		tr|A0A1S3CVI1|A0A1S3CVI1_DIACI	tr|A0A1S3CVI1|A0A1S3CVI1_DIACI 60S ribosomal protein L21 OS=Diaphorina citri OX=121845 GN=LOC103505979 PE=3 SV=1	1	4	1	1	30.8	18.331	693860	458600	431560	528007	195040	267660	272860	245187	2.15349	0.0313499
A0A1S4E9Z1	Facilitated trehalose transporter Tret1-like	LOC103507639		tr|A0A1S4E9Z1|A0A1S4E9Z1_DIACI	tr|A0A1S4E9Z1|A0A1S4E9Z1_DIACI Facilitated trehalose transporter Tret1-like OS=Diaphorina citri OX=121845 GN=LOC103507639 PE=4 SV=1	1	4	4	4	14	59.245	623340	452480	498010	524610	214490	258820	265650	246320	2.12979	0.00652721
A0A3Q0JJ64	Chaoptin-like	LOC103524185		tr|A0A3Q0JJ64|A0A3Q0JJ64_DIACI	tr|A0A3Q0JJ64|A0A3Q0JJ64_DIACI Chaoptin-like OS=Diaphorina citri OX=121845 GN=LOC103524185 PE=4 SV=1	1	1	1	1	1	154.7	116500	85515	102110	101375		57572	39464	48518	2.08943	0.0289539
A0A1S3DA08	3-ketoacyl-CoA thiolase, mitochondrial isoform X2	LOC103514425		tr|A0A1S3DA08|A0A1S3DA08_DIACI	tr|A0A1S3DA08|A0A1S3DA08_DIACI 3-ketoacyl-CoA thiolase, mitochondrial isoform X2 OS=Diaphorina citri OX=121845 GN=LOC103514425 PE=3 SV=1	1	16	1	1	61.3	41.621	225720	229710	134270	196567	108070	82508	93418	94665.3	2.07644	0.0335123
A0A3R5YN75	ATP-binding cassette sub-family B member 3	ABCB3		tr|A0A3R5YN75|A0A3R5YN75_DIACI;tr|A0A1S3CWH8|A0A1S3CWH8_DIACI	tr|A0A3R5YN75|A0A3R5YN75_DIACI ATP-binding cassette sub-family B member 3 OS=Diaphorina citri OX=121845 GN=ABCB3 PE=2 SV=1;tr|A0A1S3CWH8|A0A1S3CWH8_DIACI ATP-binding cassette sub-family B member 7, mitochondrial-like OS=Diaphorina citri OX=121845 GN=LOC103	2	6	6	6	13.9	78.14	382100	220200	361470	321257	166410	118180	179910	154833	2.07485	0.0373111
A0A1S3CXK0	Gastric triacylglycerol lipase-like isoform X1	LOC103507157		tr|A0A1S3CXK0|A0A1S3CXK0_DIACI	tr|A0A1S3CXK0|A0A1S3CXK0_DIACI Gastric triacylglycerol lipase-like isoform X1 OS=Diaphorina citri OX=121845 GN=LOC103507157 PE=3 SV=1	1	6	6	6	17.1	59.921	251810	186700	152040	196850	108000	95410	81352	94920.7	2.07384	0.0280279
A0A1S3D251	Uncharacterized protein LOC103509854	LOC103509854		tr|A0A1S3D251|A0A1S3D251_DIACI	tr|A0A1S3D251|A0A1S3D251_DIACI Uncharacterized protein LOC103509854 OS=Diaphorina citri OX=121845 GN=LOC103509854 PE=4 SV=1	1	1	1	1	2.6	37.978	98931	92537	86954	92807.3	60105		29505	44805	2.07136	0.0295386
A0A3Q0J4T0	phosphoribosylformylglycinamidine cyclo-ligase	LOC103512854		tr|A0A3Q0J4T0|A0A3Q0J4T0_DIACI;tr|A0A3Q0J0P5|A0A3Q0J0P5_DIACI	tr|A0A3Q0J4T0|A0A3Q0J4T0_DIACI phosphoribosylformylglycinamidine cyclo-ligase OS=Diaphorina citri OX=121845 GN=LOC103512854 PE=3 SV=1	2	13	13	13	17.3	119.31	1007000	698780	785560	830447	362120	446130	404210	404153	2.05478	0.010894
A0A482LQH1	Cytochrome P450 CYP4g15	CYP4g15		tr|A0A482LQH1|A0A482LQH1_DIACI	tr|A0A482LQH1|A0A482LQH1_DIACI Cytochrome P450 CYP4g15 OS=Diaphorina citri OX=121845 GN=CYP4g15 PE=2 SV=1	1	15	15	1	34.9	64.254	2145600	1240100	1733400	1.70637e+06	878170	809650	825290	837703	2.03696	0.0296993
A0A1S3DHF8	Zinc finger protein 319	LOC103518664		tr|A0A1S3DHF8|A0A1S3DHF8_DIACI	tr|A0A1S3DHF8|A0A1S3DHF8_DIACI Zinc finger protein 319 OS=Diaphorina citri OX=121845 GN=LOC103518664 PE=4 SV=1	1	1	1	1	6.4	35.756	27317	50914	37128	38453	84953	83106	63706	77255	0.497741	0.0158227
A0A3Q0J0V1	Myogenesis-regulating glycosidase-like	LOC103512939		tr|A0A3Q0J0V1|A0A3Q0J0V1_DIACI	tr|A0A3Q0J0V1|A0A3Q0J0V1_DIACI Myogenesis-regulating glycosidase-like OS=Diaphorina citri OX=121845 GN=LOC103512939 PE=3 SV=1	1	9	9	4	21.4	67.746	631230	989140	673360	764577	1559800	1428900	1633100	1540600	0.496285	0.0037114
A0A3Q0IPZ0	Uncharacterized protein LOC103507781	LOC103507781		tr|A0A3Q0IPZ0|A0A3Q0IPZ0_DIACI	tr|A0A3Q0IPZ0|A0A3Q0IPZ0_DIACI Uncharacterized protein LOC103507781 OS=Diaphorina citri OX=121845 GN=LOC103507781 PE=4 SV=1	1	3	3	3	6.8	76.317	42463	72011	73631	62701.7	129450	157600	96137	127729	0.490896	0.0335368
A0A1S4E837	Ketohexokinase-like isoform X1	LOC103506375		tr|A0A1S4E837|A0A1S4E837_DIACI;tr|A0A3Q0IRJ1|A0A3Q0IRJ1_DIACI;tr|A0A3Q0JNG1|A0A3Q0JNG1_DIACI	tr|A0A1S4E837|A0A1S4E837_DIACI Ketohexokinase-like isoform X1 OS=Diaphorina citri OX=121845 GN=LOC103506375 PE=4 SV=1;tr|A0A3Q0IRJ1|A0A3Q0IRJ1_DIACI Ketohexokinase-like isoform X3 OS=Diaphorina citri OX=121845 GN=LOC103506375 PE=4 SV=1;tr|A0A3Q0JNG1|A0A3Q0	3	6	6	3	35.5	34.138	123360	175340	147560	148753	316760	301600	300490	306283	0.485672	0.000583685
A0A3Q0IIW2	LOW QUALITY PROTEIN: cuticle protein 19.8-like	LOC103504905		tr|A0A3Q0IIW2|A0A3Q0IIW2_DIACI	tr|A0A3Q0IIW2|A0A3Q0IIW2_DIACI LOW QUALITY PROTEIN: cuticle protein 19.8-like OS=Diaphorina citri OX=121845 GN=LOC103504905 PE=4 SV=1	1	9	9	6	58.6	35.534	1523400	1104400	969860	1199220	3096600	2327000	1992200	2.47193e+06	0.485134	0.0256286
A0A1S3DK83	Peptide-methionine (R)-S-oxide reductase	LOC103519408	FUNCTION: Methionine-sulfoxide reductase that specifically reduces methionine (R)-sulfoxide back to methionine. While in many cases methionine oxidation is the result of random oxidation following oxidative stress, methionine oxidation is also a post-translational modification that takes place on specific residues. {ECO:0000256|RuleBase:RU365044}.	tr|A0A1S3DK83|A0A1S3DK83_DIACI	tr|A0A1S3DK83|A0A1S3DK83_DIACI Peptide-methionine (R)-S-oxide reductase OS=Diaphorina citri OX=121845 GN=LOC103519408 PE=3 SV=1	1	2	2	2	24.1	18.612	86642	231970	307460	208691	474870	436070	382550	431163	0.484018	0.0337514
A0A3Q0INZ7	Na(+)/H(+) exchange regulatory cofactor NHE-RF1	LOC103507246		tr|A0A3Q0INZ7|A0A3Q0INZ7_DIACI	tr|A0A3Q0INZ7|A0A3Q0INZ7_DIACI Na(+)/H(+) exchange regulatory cofactor NHE-RF1 OS=Diaphorina citri OX=121845 GN=LOC103507246 PE=4 SV=1	1	3	3	3	26.5	22.707	303700	642900	592390	512997	1210200	1090600	1012600	1.10447e+06	0.464475	0.00794247
A0A1S4EH50	Pupal cuticle protein-like	LOC103514032		tr|A0A1S4EH50|A0A1S4EH50_DIACI	tr|A0A1S4EH50|A0A1S4EH50_DIACI Pupal cuticle protein-like OS=Diaphorina citri OX=121845 GN=LOC103514032 PE=4 SV=1	1	5	4	3	28.4	42.514	1179600	910800	867680	986027	2529900	2165600	1871500	2189000	0.450446	0.00492134
A0A1S3CTU5	Tumor susceptibility gene 101 protein	LOC103505134		tr|A0A1S3CTU5|A0A1S3CTU5_DIACI;tr|A0A1S3DQ08|A0A1S3DQ08_DIACI	tr|A0A1S3CTU5|A0A1S3CTU5_DIACI Tumor susceptibility gene 101 protein OS=Diaphorina citri OX=121845 GN=LOC103505134 PE=3 SV=1;tr|A0A1S3DQ08|A0A1S3DQ08_DIACI Tumor susceptibility gene 101 protein-like OS=Diaphorina citri OX=121845 GN=LOC103521931 PE=4 SV=1	2	3	3	3	12.7	38.479	75688	121350	41359	79465.7	171500	153640	205890	177010	0.448933	0.0246501
A0A3Q0JC01	Thioredoxin-like isoform X1	LOC103518446		tr|A0A3Q0JC01|A0A3Q0JC01_DIACI;tr|A0A1S3DH26|A0A1S3DH26_DIACI	tr|A0A3Q0JC01|A0A3Q0JC01_DIACI Thioredoxin-like isoform X1 OS=Diaphorina citri OX=121845 GN=LOC103518446 PE=4 SV=1;tr|A0A1S3DH26|A0A1S3DH26_DIACI Thioredoxin-like isoform X2 OS=Diaphorina citri OX=121845 GN=LOC103518446 PE=4 SV=1	2	3	3	3	30.3	16.936		110470	73991	92230.5	169860	196660	250510	205677	0.448425	0.0428791
A0A1S3CYU3	L-dopachrome tautomerase yellow-f2-like	LOC103507908		tr|A0A1S3CYU3|A0A1S3CYU3_DIACI;tr|A0A1S3CZ05|A0A1S3CZ05_DIACI;tr|Q0PWU0|Q0PWU0_DIACI	tr|A0A1S3CYU3|A0A1S3CYU3_DIACI L-dopachrome tautomerase yellow-f2-like OS=Diaphorina citri OX=121845 GN=LOC103507908 PE=3 SV=1;tr|A0A1S3CZ05|A0A1S3CZ05_DIACI L-dopachrome tautomerase yellow-f2-like OS=Diaphorina citri OX=121845 GN=LOC103507909 PE=3 SV=1;tr	3	16	16	6	55.6	46.678	1488500	1528200	1107600	1.37477e+06	3285400	3320600	2613800	3.07327e+06	0.447331	0.00309516
A0A3Q0IQM5	Indole-3-acetaldehyde oxidase-like	LOC103505953		tr|A0A3Q0IQM5|A0A3Q0IQM5_DIACI	tr|A0A3Q0IQM5|A0A3Q0IQM5_DIACI Indole-3-acetaldehyde oxidase-like OS=Diaphorina citri OX=121845 GN=LOC103505953 PE=4 SV=1	1	9	9	9	23.1	76.559	138970	510680	379730	343127	592000	919550	794750	768767	0.446334	0.0423849
A0A3Q0JHY8	Uncharacterized protein LOC103521582	LOC103521582		tr|A0A3Q0JHY8|A0A3Q0JHY8_DIACI;tr|A0A1S3DJW7|A0A1S3DJW7_DIACI;tr|A0A1S3DJ04|A0A1S3DJ04_DIACI;tr|A0A1S3DK51|A0A1S3DK51_DIACI	tr|A0A3Q0JHY8|A0A3Q0JHY8_DIACI Uncharacterized protein LOC103521582 OS=Diaphorina citri OX=121845 GN=LOC103521582 PE=4 SV=1;tr|A0A1S3DJW7|A0A1S3DJW7_DIACI Uncharacterized protein LOC103519222 OS=Diaphorina citri OX=121845 GN=LOC103519222 PE=4 SV=1;tr|A0A1S	4	3	3	3	16.9	20.584	90879	295350	218120	201450	471080	482430	404270	452593	0.445101	0.0175499
A0A1S4EHC4	Adhesive plaque matrix protein-like	LOC103514031		tr|A0A1S4EHC4|A0A1S4EHC4_DIACI	tr|A0A1S4EHC4|A0A1S4EHC4_DIACI Adhesive plaque matrix protein-like OS=Diaphorina citri OX=121845 GN=LOC103514031 PE=4 SV=2	1	7	7	5	20.9	77.241	800190	938570	606510	781757	1962900	1663900	1672200	1.76633e+06	0.442587	0.00201983
A0A3Q0J3U8	Short-chain specific acyl-CoA dehydrogenase, mitochondrial	LOC103511969		tr|A0A3Q0J3U8|A0A3Q0J3U8_DIACI	tr|A0A3Q0J3U8|A0A3Q0J3U8_DIACI Short-chain specific acyl-CoA dehydrogenase, mitochondrial OS=Diaphorina citri OX=121845 GN=LOC103511969 PE=3 SV=1	1	3	3	3	35.5	22.88	52495	214600	260500	175865	456700	366010	374120	398943	0.440827	0.0324912
A0A3Q0JHC7	Wiskott-Aldrich syndrome protein family member	LOC103521142	FUNCTION: Downstream effector molecule involved in the transmission of signals from tyrosine kinase receptors and small GTPases to the actin cytoskeleton. Promotes formation of actin filaments. Part of the WAVE complex that regulates lamellipodia formation. The WAVE complex regulates actin filament reorganization via its interaction with the Arp2/3 complex. {ECO:0000256|RuleBase:RU367034}.	tr|A0A3Q0JHC7|A0A3Q0JHC7_DIACI	tr|A0A3Q0JHC7|A0A3Q0JHC7_DIACI Wiskott-Aldrich syndrome protein family member OS=Diaphorina citri OX=121845 GN=LOC103521142 PE=3 SV=1	1	2	2	2	6.1	56.454	23265	34174	39056	32165		79864	67810	73837	0.435622	0.0115688
A0A3Q0JNV3	Uncharacterized protein LOC113472910	LOC113472910		tr|A0A3Q0JNV3|A0A3Q0JNV3_DIACI	tr|A0A3Q0JNV3|A0A3Q0JNV3_DIACI Uncharacterized protein LOC113472910 OS=Diaphorina citri OX=121845 GN=LOC113472910 PE=4 SV=1	1	4	4	1	76.5	8.6996	1349400	1156800	960920	1.15571e+06	3151200	2472700	2357900	2660600	0.434378	0.00519788
A0A1S4E9K9	Uncharacterized protein LOC103507494 isoform X1	LOC103507494		tr|A0A1S4E9K9|A0A1S4E9K9_DIACI;tr|A0A3Q0IPB3|A0A3Q0IPB3_DIACI	tr|A0A1S4E9K9|A0A1S4E9K9_DIACI Uncharacterized protein LOC103507494 isoform X1 OS=Diaphorina citri OX=121845 GN=LOC103507494 PE=4 SV=1;tr|A0A3Q0IPB3|A0A3Q0IPB3_DIACI Uncharacterized protein LOC103507496 OS=Diaphorina citri OX=121845 GN=LOC103507496 PE=4 SV	2	4	4	4	11.9	70.002	824380	1423000	1005500	1.08429e+06	2792100	1937300	2830000	2519800	0.430309	0.0136052
A0A3Q0J5K1	Membrane alanyl aminopeptidase-like	LOC103515108		tr|A0A3Q0J5K1|A0A3Q0J5K1_DIACI	tr|A0A3Q0J5K1|A0A3Q0J5K1_DIACI Membrane alanyl aminopeptidase-like OS=Diaphorina citri OX=121845 GN=LOC103515108 PE=3 SV=1	1	5	5	5	44.8	20.758	697320	610710	235120	514383	908050	1556700	1147000	1.20392e+06	0.427258	0.0435054
A0A1S3DKT0	DNA-directed RNA polymerase II subunit RPB1-like	LOC103520562		tr|A0A1S3DKT0|A0A1S3DKT0_DIACI	tr|A0A1S3DKT0|A0A1S3DKT0_DIACI DNA-directed RNA polymerase II subunit RPB1-like OS=Diaphorina citri OX=121845 GN=LOC103520562 PE=4 SV=1	1	3	3	3	33.6	16.844	1175900	1008600	1321000	1168500	2671400	2735600	2823700	2.74357e+06	0.425905	9.67173e-05
A0A3Q0JJX5	Cuticle protein 7-like	LOC103523060		tr|A0A3Q0JJX5|A0A3Q0JJX5_DIACI;tr|A0A3Q0J6I0|A0A3Q0J6I0_DIACI;tr|A0A3Q0JP81|A0A3Q0JP81_DIACI;tr|A0A1S4ESG8|A0A1S4ESG8_DIACI	tr|A0A3Q0JJX5|A0A3Q0JJX5_DIACI Cuticle protein 7-like OS=Diaphorina citri OX=121845 GN=LOC103523060 PE=4 SV=1;tr|A0A3Q0J6I0|A0A3Q0J6I0_DIACI Cuticle protein 21-like OS=Diaphorina citri OX=121845 GN=LOC103515660 PE=4 SV=1;tr|A0A3Q0JP81|A0A3Q0JP81_DIACI DNA-	4	3	3	3	18.6	16.691	249330	789270	742150	593583	1590200	1312800	1281100	1394700	0.425599	0.0156902
A0A6G7S618	Cathepsin L-like protein			tr|A0A6G7S618|A0A6G7S618_DIACI;tr|A0A3Q0IST6|A0A3Q0IST6_DIACI;tr|A0A1S3DUK6|A0A1S3DUK6_DIACI;tr|A0A3Q0IM90|A0A3Q0IM90_DIACI;tr|A0A3Q0JQA2|A0A3Q0JQA2_DIACI	tr|A0A6G7S618|A0A6G7S618_DIACI Cathepsin L-like protein OS=Diaphorina citri OX=121845 PE=2 SV=1	5	13	13	13	55.1	38.04	2473800	4090700	6585600	4.38337e+06	10596000	10544000	9915400	10351800	0.42344	0.00799173
A0A1S3D0U3	Uncharacterized protein LOC103508960	LOC103508960		tr|A0A1S3D0U3|A0A1S3D0U3_DIACI	tr|A0A1S3D0U3|A0A1S3D0U3_DIACI Uncharacterized protein LOC103508960 OS=Diaphorina citri OX=121845 GN=LOC103508960 PE=4 SV=1	1	2	2	2	5.4	63.526	16593	24993	33053	24879.7	50518	74782	51221	58840.3	0.422834	0.0216041
A0A1S3CWQ4	Uncharacterized protein LOC103506671	LOC103506671		tr|A0A1S3CWQ4|A0A1S3CWQ4_DIACI	tr|A0A1S3CWQ4|A0A1S3CWQ4_DIACI Uncharacterized protein LOC103506671 OS=Diaphorina citri OX=121845 GN=LOC103506671 PE=4 SV=1	1	2	2	2	18.3	13.652	19167	69598	91709	60158	171650	131860	127000	143503	0.41921	0.0316091
A0A1S4EJA0	Uncharacterized protein LOC108253207	LOC108253208		tr|A0A1S4EJA0|A0A1S4EJA0_DIACI	tr|A0A1S4EJA0|A0A1S4EJA0_DIACI Uncharacterized protein LOC108253207 OS=Diaphorina citri OX=121845 GN=LOC108253208 PE=3 SV=1	1	2	2	2	3.7	57.851	45720	29754	28034	34502.7	99086	91316	64065	84822.3	0.406764	0.0138428
A0A1S4ESH4	Laminin subunit alpha-1-like	LOC108254526		tr|A0A1S4ESH4|A0A1S4ESH4_DIACI	tr|A0A1S4ESH4|A0A1S4ESH4_DIACI Laminin subunit alpha-1-like OS=Diaphorina citri OX=121845 GN=LOC108254526 PE=4 SV=1	1	2	2	2	57.1	7.6698	15700	47993	34242	32645	58806	93182	90488	80825.3	0.403896	0.0291097
A0A1S4EB83	Acidic amino acid decarboxylase GADL1	LOC103508957		tr|A0A1S4EB83|A0A1S4EB83_DIACI	tr|A0A1S4EB83|A0A1S4EB83_DIACI Acidic amino acid decarboxylase GADL1 OS=Diaphorina citri OX=121845 GN=LOC103508957 PE=3 SV=1	1	1	1	1	4.5	40.112	46395	147000	177400	123598	304430	334040	280100	306190	0.403665	0.0127318
A0A1S3CTW2	Vacuolar protein sorting-associated protein 28 homolog	LOC103505171	FUNCTION: Component of the ESCRT-I complex (endosomal sorting complex required for transport I), a regulator of vesicular trafficking process. {ECO:0000256|PIRNR:PIRNR017535}.	tr|A0A1S3CTW2|A0A1S3CTW2_DIACI	tr|A0A1S3CTW2|A0A1S3CTW2_DIACI Vacuolar protein sorting-associated protein 28 homolog OS=Diaphorina citri OX=121845 GN=LOC103505171 PE=3 SV=1	1	2	2	2	21.4	23.731	20694	32842	6906.3	20147.4	49063	61541	40242	50282	0.400689	0.0361121
A0A1S3CUS8	Protein CREG1 isoform X3	LOC103504940		tr|A0A1S3CUS8|A0A1S3CUS8_DIACI;tr|A0A1S3CTG6|A0A1S3CTG6_DIACI	tr|A0A1S3CUS8|A0A1S3CUS8_DIACI Protein CREG1 isoform X3 OS=Diaphorina citri OX=121845 GN=LOC103504940 PE=4 SV=1;tr|A0A1S3CTG6|A0A1S3CTG6_DIACI Protein CREG1 isoform X1 OS=Diaphorina citri OX=121845 GN=LOC103504940 PE=4 SV=1	2	2	2	2	16.9	26.666	19240	61313	63105	47886	107420	148140	106910	120823	0.396331	0.0211306
A0A1S3CUU7	Beta-ureidopropionase-like	LOC103505681		tr|A0A1S3CUU7|A0A1S3CUU7_DIACI	tr|A0A1S3CUU7|A0A1S3CUU7_DIACI Beta-ureidopropionase-like OS=Diaphorina citri OX=121845 GN=LOC103505681 PE=4 SV=1	1	3	3	3	19.2	33.029	13510	78188	70090	53929.3	130340	162730	116900	136657	0.394634	0.0277746
A0A1S3DBW7	LOW QUALITY PROTEIN: cuticle protein-like	LOC103515659		tr|A0A1S3DBW7|A0A1S3DBW7_DIACI	tr|A0A1S3DBW7|A0A1S3DBW7_DIACI LOW QUALITY PROTEIN: cuticle protein-like OS=Diaphorina citri OX=121845 GN=LOC103515659 PE=4 SV=2	1	4	4	4	48.7	41.106	76285	84184	73027	77832	227570	161290	212620	200493	0.388202	0.00381271
A0A1S4EN21	Uncharacterized protein LOC103519146 isoform X1	LOC103519146		tr|A0A1S4EN21|A0A1S4EN21_DIACI;tr|A0A3Q0IYU1|A0A3Q0IYU1_DIACI	tr|A0A1S4EN21|A0A1S4EN21_DIACI Uncharacterized protein LOC103519146 isoform X1 OS=Diaphorina citri OX=121845 GN=LOC103519146 PE=4 SV=1;tr|A0A3Q0IYU1|A0A3Q0IYU1_DIACI Uncharacterized protein LOC113467702 OS=Diaphorina citri OX=121845 GN=LOC113467702 PE=4 SV	2	4	4	4	31.4	14.815	26586	220360	202980	149975	488370	362280	366670	405773	0.369604	0.0263624
A0A1S4EIX4	Uncharacterized protein LOC108253140	LOC108253140		tr|A0A1S4EIX4|A0A1S4EIX4_DIACI;tr|A0A1S4EIK0|A0A1S4EIK0_DIACI	tr|A0A1S4EIX4|A0A1S4EIX4_DIACI Uncharacterized protein LOC108253140 OS=Diaphorina citri OX=121845 GN=LOC108253140 PE=4 SV=1;tr|A0A1S4EIK0|A0A1S4EIK0_DIACI Uncharacterized protein LOC103515194 OS=Diaphorina citri OX=121845 GN=LOC103515194 PE=4 SV=1	2	2	2	2	77.8	7.4174		355520	170400	262960	650040	695690	792040	712590	0.36902	0.0143372
A0A3Q0ILF9	Uncharacterized protein LOC103506099	LOC103506099		tr|A0A3Q0ILF9|A0A3Q0ILF9_DIACI	tr|A0A3Q0ILF9|A0A3Q0ILF9_DIACI Uncharacterized protein LOC103506099 OS=Diaphorina citri OX=121845 GN=LOC103506099 PE=4 SV=1	1	3	3	3	16.9	41.012	78270	57658	65640	67189.3	237340	178840	133890	183357	0.366441	0.0190497
A0A1S3DNJ3	Myogenesis-regulating glycosidase-like	LOC103522023		tr|A0A1S3DNJ3|A0A1S3DNJ3_DIACI	tr|A0A1S3DNJ3|A0A1S3DNJ3_DIACI Myogenesis-regulating glycosidase-like OS=Diaphorina citri OX=121845 GN=LOC103522023 PE=3 SV=1	1	3	3	3	28.5	22.744	446430	609670	331910	462670	1028800	1613300	1152700	1.26493e+06	0.365766	0.01474
A0A3Q0J1I4	Fibrillin-2-like	LOC113469092		tr|A0A3Q0J1I4|A0A3Q0J1I4_DIACI	tr|A0A3Q0J1I4|A0A3Q0J1I4_DIACI Fibrillin-2-like OS=Diaphorina citri OX=121845 GN=LOC113469092 PE=4 SV=1	1	3	3	3	9	49.804	10548	62068	160380	77665.3	183220	216530	238850	212867	0.364854	0.0446891
A0A1S4EQ10	Probable uridine nucleosidase 2	LOC103520937		tr|A0A1S4EQ10|A0A1S4EQ10_DIACI	tr|A0A1S4EQ10|A0A1S4EQ10_DIACI Probable uridine nucleosidase 2 OS=Diaphorina citri OX=121845 GN=LOC103520937 PE=3 SV=2	1	3	2	2	27.8	19.258	14981	303870	184910	167920	598920	377270	425610	467267	0.359367	0.049575
A0A1S3CXY8	Ester hydrolase C11orf54 homolog	LOC103507380		tr|A0A1S3CXY8|A0A1S3CXY8_DIACI	tr|A0A1S3CXY8|A0A1S3CXY8_DIACI Ester hydrolase C11orf54 homolog OS=Diaphorina citri OX=121845 GN=LOC103507380 PE=4 SV=1	1	1	1	1	27.4	8.1542	26154	12180	41745	26693	93642	66922	64147	74903.7	0.356364	0.0191766
A0A3Q0JC90	Protein windbeutel-like	LOC103516021		tr|A0A3Q0JC90|A0A3Q0JC90_DIACI	tr|A0A3Q0JC90|A0A3Q0JC90_DIACI Protein windbeutel-like OS=Diaphorina citri OX=121845 GN=LOC103516021 PE=4 SV=1	1	2	2	2	9.2	32.085	5102.3	48080	33550	28910.8	94935	80576	68052	81187.7	0.356098	0.0242844
A0A1S3CXQ3	Uncharacterized protein LOC103507240	LOC103507240		tr|A0A1S3CXQ3|A0A1S3CXQ3_DIACI	tr|A0A1S3CXQ3|A0A1S3CXQ3_DIACI Uncharacterized protein LOC103507240 OS=Diaphorina citri OX=121845 GN=LOC103507240 PE=4 SV=1	1	5	5	5	47.4	16.417	374340	453160	439480	422327	1153900	1444100	974940	1190980	0.354604	0.00520373
A0A3Q0J450	Uncharacterized protein LOC103514429 isoform X1	LOC103514429		tr|A0A3Q0J450|A0A3Q0J450_DIACI	tr|A0A3Q0J450|A0A3Q0J450_DIACI Uncharacterized protein LOC103514429 isoform X1 OS=Diaphorina citri OX=121845 GN=LOC103514429 PE=4 SV=1	1	4	4	4	21	35.719	27147	53734	46219	42366.7	138200	129320	96078	121199	0.349562	0.00637149
A0A1S3D5S1	Tetra-peptide repeat homeobox protein 1-like isoform X3	LOC103511135		tr|A0A1S3D5S1|A0A1S3D5S1_DIACI;tr|A0A1S3D499|A0A1S3D499_DIACI;tr|A0A3Q0J6E0|A0A3Q0J6E0_DIACI;tr|A0A3Q0JKU1|A0A3Q0JKU1_DIACI;tr|A0A1S4ES07|A0A1S4ES07_DIACI	tr|A0A1S3D5S1|A0A1S3D5S1_DIACI Tetra-peptide repeat homeobox protein 1-like isoform X3 OS=Diaphorina citri OX=121845 GN=LOC103511135 PE=4 SV=1;tr|A0A1S3D499|A0A1S3D499_DIACI Cuticle protein 64-like isoform X1 OS=Diaphorina citri OX=121845 GN=LOC103511135 P	5	8	4	4	36.4	27.337	455020	321410	294360	356930	1281200	1032900	816920	1.04367e+06	0.341994	0.00863997
A0A3Q0J6U1	Ribonuclease H1-like isoform X2	LOC103515795		tr|A0A3Q0J6U1|A0A3Q0J6U1_DIACI;tr|A0A3Q0J9A5|A0A3Q0J9A5_DIACI	tr|A0A3Q0J6U1|A0A3Q0J6U1_DIACI Ribonuclease H1-like isoform X2 OS=Diaphorina citri OX=121845 GN=LOC103515795 PE=4 SV=1;tr|A0A3Q0J9A5|A0A3Q0J9A5_DIACI Ribonuclease H1 OS=Diaphorina citri OX=121845 GN=LOC103514891 PE=4 SV=1	2	2	2	2	51.4	7.7425	23689	37089	78008	46262	189100	142640	92861	141534	0.326862	0.0417365
A0A1S3DG58	glutamate dehydrogenase [NAD(P)(+)]	LOC103517081		tr|A0A1S3DG58|A0A1S3DG58_DIACI	tr|A0A1S3DG58|A0A1S3DG58_DIACI glutamate dehydrogenase [NAD(P)(+)] OS=Diaphorina citri OX=121845 GN=LOC103517081 PE=3 SV=1	1	5	5	5	40.4	29.074	116340	98865	131310	115505	228210	401820	432880	354303	0.326006	0.0206554
A0A1S3D9B9	Cuticle protein 12.5-like isoform X1	LOC103514025		tr|A0A1S3D9B9|A0A1S3D9B9_DIACI;tr|A0A3Q0J320|A0A3Q0J320_DIACI	tr|A0A1S3D9B9|A0A1S3D9B9_DIACI Cuticle protein 12.5-like isoform X1 OS=Diaphorina citri OX=121845 GN=LOC103514025 PE=4 SV=1;tr|A0A3Q0J320|A0A3Q0J320_DIACI Cuticle protein 12.5-like isoform X2 OS=Diaphorina citri OX=121845 GN=LOC103514025 PE=4 SV=1	2	7	7	7	47.7	20.508	587340	879380	669130	711950	2661100	2337300	1799900	2266100	0.314174	0.0042658
A0A1S3DFR9	Isovaleryl-CoA dehydrogenase, mitochondrial	LOC103517796		tr|A0A1S3DFR9|A0A1S3DFR9_DIACI	tr|A0A1S3DFR9|A0A1S3DFR9_DIACI Isovaleryl-CoA dehydrogenase, mitochondrial OS=Diaphorina citri OX=121845 GN=LOC103517796 PE=3 SV=1	1	3	3	3	12.6	46.246	3364.1	49354	33087	28601.7	98321	90816	87756	92297.7	0.309885	0.00997635
A0A3Q0JF85	Uncharacterized protein LOC113471881	LOC113471881		tr|A0A3Q0JF85|A0A3Q0JF85_DIACI	tr|A0A3Q0JF85|A0A3Q0JF85_DIACI Uncharacterized protein LOC113471881 OS=Diaphorina citri OX=121845 GN=LOC113471881 PE=4 SV=1	1	4	4	4	61.6	8.4355	148190	329260	250360	242603	1108100	454980	799080	787387	0.308112	0.0496824
A0A1S4E9U5	c-Myc-binding protein homolog	LOC103507586		tr|A0A1S4E9U5|A0A1S4E9U5_DIACI	tr|A0A1S4E9U5|A0A1S4E9U5_DIACI c-Myc-binding protein homolog OS=Diaphorina citri OX=121845 GN=LOC103507586 PE=3 SV=1	1	2	2	2	33.3	12.606	5767	48720	16211	23566	60370	75890	94468	76909.3	0.306413	0.0304879
A0A3Q0J4B6	Polyamine oxidase 1-like	LOC113469677		tr|A0A3Q0J4B6|A0A3Q0J4B6_DIACI	tr|A0A3Q0J4B6|A0A3Q0J4B6_DIACI Polyamine oxidase 1-like OS=Diaphorina citri OX=121845 GN=LOC113469677 PE=4 SV=1	1	3	1	1	40.6	17.191	41908		20461	31184.5	95712	113730		104721	0.297786	0.0344124
A0A3Q0IYI7	Uncharacterized protein LOC103511890	LOC103511890		tr|A0A3Q0IYI7|A0A3Q0IYI7_DIACI	tr|A0A3Q0IYI7|A0A3Q0IYI7_DIACI Uncharacterized protein LOC103511890 OS=Diaphorina citri OX=121845 GN=LOC103511890 PE=4 SV=1	1	2	2	2	13.6	21.575	14851	13571		14211		55314	42330	48822	0.291078	0.0337371
A0A1S3DK34	DNA-directed RNA polymerase II subunit RPB1-like	LOC103520198		tr|A0A1S3DK34|A0A1S3DK34_DIACI	tr|A0A1S3DK34|A0A1S3DK34_DIACI DNA-directed RNA polymerase II subunit RPB1-like OS=Diaphorina citri OX=121845 GN=LOC103520198 PE=4 SV=1	1	2	2	2	24.5	25.84	67712	183840	76814	109455	408290	299670	429420	379127	0.288704	0.00793613
A0A1S3DT86	Uncharacterized protein LOC103524291	LOC103524291		tr|A0A1S3DT86|A0A1S3DT86_DIACI	tr|A0A1S3DT86|A0A1S3DT86_DIACI Uncharacterized protein LOC103524291 OS=Diaphorina citri OX=121845 GN=LOC103524291 PE=4 SV=1	1	11	11	11	64.8	22.521	4978800	3398400	3256000	3.87773e+06	13180000	13082000	14165000	1.34757e+07	0.287758	0.000123513
A0A3Q0IT24	Uncharacterized protein PF11_0213-like	LOC103509222		tr|A0A3Q0IT24|A0A3Q0IT24_DIACI	tr|A0A3Q0IT24|A0A3Q0IT24_DIACI Uncharacterized protein PF11_0213-like OS=Diaphorina citri OX=121845 GN=LOC103509222 PE=4 SV=1	1	3	3	3	3.3	237.01	36719	37738	1958.6	25471.9	109220	67710	93680	90203.3	0.282383	0.0185399
A0A3Q0JCA4	Uncharacterized protein LOC113470385	LOC113470385		tr|A0A3Q0JCA4|A0A3Q0JCA4_DIACI	tr|A0A3Q0JCA4|A0A3Q0JCA4_DIACI Uncharacterized protein LOC113470385 OS=Diaphorina citri OX=121845 GN=LOC113470385 PE=4 SV=1	1	3	3	3	43.6	11.286	10104	209530	139120	119585	273820	475090	567330	438747	0.27256	0.0378659
A0A3Q0IK95	U3 small nucleolar RNA-associated protein 15 homolog	LOC103505537		tr|A0A3Q0IK95|A0A3Q0IK95_DIACI	tr|A0A3Q0IK95|A0A3Q0IK95_DIACI U3 small nucleolar RNA-associated protein 15 homolog OS=Diaphorina citri OX=121845 GN=LOC103505537 PE=4 SV=1	1	1	1	1	5	50.829	6678.2	91675	52897	50416.7	224420	140770	206770	190653	0.264442	0.016623
A0A1S3D9V9	Uncharacterized protein LOC103514405 isoform X1	LOC103514405		tr|A0A1S3D9V9|A0A1S3D9V9_DIACI;tr|A0A3Q0J894|A0A3Q0J894_DIACI	tr|A0A1S3D9V9|A0A1S3D9V9_DIACI Uncharacterized protein LOC103514405 isoform X1 OS=Diaphorina citri OX=121845 GN=LOC103514405 PE=4 SV=1;tr|A0A3Q0J894|A0A3Q0J894_DIACI Uncharacterized protein LOC113469560 OS=Diaphorina citri OX=121845 GN=LOC113469560 PE=4 SV	2	5	5	5	39.2	21.786	40700	143680	54505	79628.3	335840	213540	355900	301760	0.26388	0.0155835
A0A1S3D756	Cathepsin B-like cysteine proteinase 4	LOC103511936		tr|A0A1S3D756|A0A1S3D756_DIACI	tr|A0A1S3D756|A0A1S3D756_DIACI Cathepsin B-like cysteine proteinase 4 OS=Diaphorina citri OX=121845 GN=LOC103511936 PE=3 SV=1	1	3	3	3	10.9	49.208	16884	10924	25106	17638	68548	85926	51542	68672	0.256844	0.0089702
A0A1S3D2X5	Choline transporter-like protein	LOC103510375		tr|A0A1S3D2X5|A0A1S3D2X5_DIACI;tr|A0A1S4EDW2|A0A1S4EDW2_DIACI	tr|A0A1S3D2X5|A0A1S3D2X5_DIACI Choline transporter-like protein OS=Diaphorina citri OX=121845 GN=LOC103510375 PE=3 SV=1;tr|A0A1S4EDW2|A0A1S4EDW2_DIACI Choline transporter-like protein OS=Diaphorina citri OX=121845 GN=LOC103510909 PE=3 SV=1	2	2	2	2	5.9	62.109	12563	13094	17206	14287.7	52826	44944	74037	57269	0.249483	0.00816923
A0A3Q0J396	Cuticle protein 16.5-like	LOC113469420		tr|A0A3Q0J396|A0A3Q0J396_DIACI	tr|A0A3Q0J396|A0A3Q0J396_DIACI Cuticle protein 16.5-like OS=Diaphorina citri OX=121845 GN=LOC113469420 PE=4 SV=1	1	5	5	5	25.6	31.435	56598	25091	32010	37899.7	213870	167770	86662	156101	0.24279	0.0369744
A0A3Q0JDI6	Uncharacterized protein LOC113471498	LOC113471498		tr|A0A3Q0JDI6|A0A3Q0JDI6_DIACI	tr|A0A3Q0JDI6|A0A3Q0JDI6_DIACI Uncharacterized protein LOC113471498 OS=Diaphorina citri OX=121845 GN=LOC113471498 PE=4 SV=1	1	2	2	2	24.4	18.107	23427	21948	25431	23602	91720	102520	116130	103457	0.228134	0.00036265
A0A3Q0J7D7	Collagen alpha-1(IV) chain-like	LOC108252929		tr|A0A3Q0J7D7|A0A3Q0J7D7_DIACI	tr|A0A3Q0J7D7|A0A3Q0J7D7_DIACI Collagen alpha-1(IV) chain-like OS=Diaphorina citri OX=121845 GN=LOC108252929 PE=4 SV=1	1	2	2	2	1.2	216.17	9063.8	29291	41986	26780.3	169690	107600	89894	122395	0.218803	0.0213138
A0A3Q0J186	Calmodulin	LOC113468030	FUNCTION: May be involved in calcium-mediated signal transduction. {ECO:0000256|RuleBase:RU367017}.	tr|A0A3Q0J186|A0A3Q0J186_DIACI	tr|A0A3Q0J186|A0A3Q0J186_DIACI Calmodulin OS=Diaphorina citri OX=121845 GN=LOC113468030 PE=4 SV=1	1	4	1	1	36	15.8	56406	300740		178573	813450	913750	730480	819227	0.217978	0.0111098
A0A1S3DI95	Cuticle protein 7-like	LOC103518903		tr|A0A1S3DI95|A0A1S3DI95_DIACI	tr|A0A1S3DI95|A0A1S3DI95_DIACI Cuticle protein 7-like OS=Diaphorina citri OX=121845 GN=LOC103518903 PE=4 SV=2	1	2	2	2	29.8	25.987	46185	120140	115720	94015	548150	469170	366340	461220	0.20384	0.00315091
A0A1S3D799	Skin secretory protein xP2-like	LOC103512800		tr|A0A1S3D799|A0A1S3D799_DIACI	tr|A0A1S3D799|A0A1S3D799_DIACI Skin secretory protein xP2-like OS=Diaphorina citri OX=121845 GN=LOC103512800 PE=4 SV=1	1	4	3	3	11.5	58.599	6067.5	44276	34502	28281.8	202350	115520	118820	145563	0.194292	0.0186417
A0A1S3DN58	Uncharacterized protein LOC103520974	LOC103520974		tr|A0A1S3DN58|A0A1S3DN58_DIACI	tr|A0A1S3DN58|A0A1S3DN58_DIACI Uncharacterized protein LOC103520974 OS=Diaphorina citri OX=121845 GN=LOC103520974 PE=4 SV=1	1	4	3	3	22.7	22.557	193290	2993.2	56447	84243.4	573300	393670	368910	445293	0.189186	0.0135975
A0A1S3CYZ8	Alpha-taxilin isoform X1	LOC103507936		tr|A0A1S3CYZ8|A0A1S3CYZ8_DIACI	tr|A0A1S3CYZ8|A0A1S3CYZ8_DIACI Alpha-taxilin isoform X1 OS=Diaphorina citri OX=121845 GN=LOC103507936 PE=3 SV=1	1	2	2	2	4.4	88.059	1073.2	8702.8	6520	5432	30768	31501	27000	29756.3	0.182549	0.000797023
A0A3Q0JAN7	Vesicle transport through interaction with t-SNAREs homolog 1A	LOC103515551		tr|A0A3Q0JAN7|A0A3Q0JAN7_DIACI	tr|A0A3Q0JAN7|A0A3Q0JAN7_DIACI Vesicle transport through interaction with t-SNAREs homolog 1A OS=Diaphorina citri OX=121845 GN=LOC103515551 PE=3 SV=1	1	2	2	2	35.8	12.59	25711	120580	102960	83083.7	295210	668030	635150	532797	0.155939	0.0214723
A0A1S3D5E8	Cuticle protein 12.5-like	LOC103511709		tr|A0A1S3D5E8|A0A1S3D5E8_DIACI	tr|A0A1S3D5E8|A0A1S3D5E8_DIACI Cuticle protein 12.5-like OS=Diaphorina citri OX=121845 GN=LOC103511709 PE=4 SV=1	1	4	4	4	52.9	16.173	245320	318930	356240	306830	2252400	2050600	2194500	2.16583e+06	0.141668	1.08163e-05
A0A1S3DLE1	Protein arginine N-methyltransferase 6 isoform X1	LOC103520064		tr|A0A1S3DLE1|A0A1S3DLE1_DIACI;tr|A0A1S3DJT2|A0A1S3DJT2_DIACI	tr|A0A1S3DLE1|A0A1S3DLE1_DIACI Protein arginine N-methyltransferase 6 isoform X1 OS=Diaphorina citri OX=121845 GN=LOC103520064 PE=4 SV=1;tr|A0A1S3DJT2|A0A1S3DJT2_DIACI Probable protein arginine N-methyltransferase 6.1 isoform X2 OS=Diaphorina citri OX=1218	2	4	4	4	13.9	41.068	11097	116810	51501	59802.7	315440	332910	677180	441843	0.135348	0.0349062
A0A3Q0J650	Uncharacterized protein LOC103513092 isoform X1	LOC103513092		tr|A0A3Q0J650|A0A3Q0J650_DIACI;tr|A0A3Q0J158|A0A3Q0J158_DIACI;tr|A0A3Q0J132|A0A3Q0J132_DIACI	tr|A0A3Q0J650|A0A3Q0J650_DIACI Uncharacterized protein LOC103513092 isoform X1 OS=Diaphorina citri OX=121845 GN=LOC103513092 PE=4 SV=1;tr|A0A3Q0J158|A0A3Q0J158_DIACI Uncharacterized protein LOC103513092 isoform X2 OS=Diaphorina citri OX=121845 GN=LOC103513	3	2	2	2	16.3	15.147	95669	68668	79196	81177.7	1024200	540820	425630	663550	0.122338	0.0337571
A0A1S3DBU1	Golgi phosphoprotein 3 homolog sauron	LOC103515313		tr|A0A1S3DBU1|A0A1S3DBU1_DIACI	tr|A0A1S3DBU1|A0A1S3DBU1_DIACI Golgi phosphoprotein 3 homolog sauron OS=Diaphorina citri OX=121845 GN=LOC103515313 PE=3 SV=1	1	1	1	1	7.4	26.353	2744.6	2286.1	1555.5	2195.4	18197	19550		18873.5	0.116322	0.000144596
A0A3Q0IWW8	Protein PRRC1-like	LOC103508583		tr|A0A3Q0IWW8|A0A3Q0IWW8_DIACI;tr|A0A1S3DEK0|A0A1S3DEK0_DIACI;tr|A0A3Q0J9B4|A0A3Q0J9B4_DIACI	tr|A0A3Q0IWW8|A0A3Q0IWW8_DIACI Protein PRRC1-like OS=Diaphorina citri OX=121845 GN=LOC103508583 PE=3 SV=1;tr|A0A1S3DEK0|A0A1S3DEK0_DIACI Protein PRRC1-like OS=Diaphorina citri OX=121845 GN=LOC103516963 PE=3 SV=1	3	3	3	3	23.2	23.098	18315	3642.3	8629.6	10195.6	108540	95532	93464	99178.7	0.102801	0.000154121
A0A3Q0IZY5	Glucose-induced degradation protein 8 homolog isoform X2	LOC103512524		tr|A0A3Q0IZY5|A0A3Q0IZY5_DIACI;tr|A0A1S3D829|A0A1S3D829_DIACI	tr|A0A3Q0IZY5|A0A3Q0IZY5_DIACI Glucose-induced degradation protein 8 homolog isoform X2 OS=Diaphorina citri OX=121845 GN=LOC103512524 PE=4 SV=1;tr|A0A1S3D829|A0A1S3D829_DIACI Glucose-induced degradation protein 8 homolog isoform X1 OS=Diaphorina citri OX=1	2	1	1	1	13.4	24.147	1751.5	619.87	8645.6	3672.32	41703	53941		47822	0.0767915	0.00423784
A0A3Q0JK44	Cuticle protein 12.5-like	LOC103520723		tr|A0A3Q0JK44|A0A3Q0JK44_DIACI	tr|A0A3Q0JK44|A0A3Q0JK44_DIACI Cuticle protein 12.5-like OS=Diaphorina citri OX=121845 GN=LOC103520723 PE=4 SV=1	1	5	5	5	48.4	16.535	174160	139490	150080	154577	2545000	1819500	1703900	2022800	0.0764172	0.00208727
A0A6G5VBM7	ATP-binding cassette transporter	ABCG15		tr|A0A6G5VBM7|A0A6G5VBM7_DIACI;tr|A0A3R5WTC8|A0A3R5WTC8_DIACI;tr|A0A3Q0IQC3|A0A3Q0IQC3_DIACI	tr|A0A6G5VBM7|A0A6G5VBM7_DIACI ATP-binding cassette transporter OS=Diaphorina citri OX=121845 GN=ABCG15 PE=2 SV=1;tr|A0A3R5WTC8|A0A3R5WTC8_DIACI ATP-binding cassette sub-family G member 17 OS=Diaphorina citri OX=121845 GN=ABCG17 PE=2 SV=1;tr|A0A3Q0IQC3|A0A	3	2	2	2	9.5	56.565	390270	2586.3	8466.8	133774	2900000	1703700	1298300	1.96733e+06	0.0679978	0.0211157
A0A1S3CUP2	pyridoxal 5-phosphate synthase	LOC103505604		tr|A0A1S3CUP2|A0A1S3CUP2_DIACI	tr|A0A1S3CUP2|A0A1S3CUP2_DIACI pyridoxal 5-phosphate synthase OS=Diaphorina citri OX=121845 GN=LOC103505604 PE=3 SV=1	1	3	3	3	20.7	30.183	19506	1139.1	9341.9	9995.67	181540	161460	131650	158217	0.0631771	0.000657464
A0A1S3DFV1	Protein argonaute-2	LOC103517620		tr|A0A1S3DFV1|A0A1S3DFV1_DIACI	tr|A0A1S3DFV1|A0A1S3DFV1_DIACI Protein argonaute-2 OS=Diaphorina citri OX=121845 GN=LOC103517620 PE=4 SV=1	1	8	8	8	54.5	28.438	16075	36795	37498	30122.7	269070	746500	426120	480563	0.062682	0.0328279
A0A3Q0JNB2	Uncharacterized protein LOC113472673	LOC113472673		tr|A0A3Q0JNB2|A0A3Q0JNB2_DIACI	tr|A0A3Q0JNB2|A0A3Q0JNB2_DIACI Uncharacterized protein LOC113472673 OS=Diaphorina citri OX=121845 GN=LOC113472673 PE=4 SV=1	1	1	1	1	13	11.505	7262.2	1124	4810.4	4398.87	63375	77013	72464	70950.7	0.0619989	0.000110175
A0A3Q0J478	Uncharacterized protein LOC103514764	LOC103514764		tr|A0A3Q0J478|A0A3Q0J478_DIACI	tr|A0A3Q0J478|A0A3Q0J478_DIACI Uncharacterized protein LOC103514764 OS=Diaphorina citri OX=121845 GN=LOC103514764 PE=4 SV=1	1	5	5	5	14.3	67.669	5277.4	7316.2	4790.2	5794.6	137510	157060	129980	141517	0.0409464	7.45963e-05
A0A1S4ELP8	Glutenin, high molecular weight subunit PW212	LOC108253505		tr|A0A1S4ELP8|A0A1S4ELP8_DIACI	tr|A0A1S4ELP8|A0A1S4ELP8_DIACI Glutenin, high molecular weight subunit PW212 OS=Diaphorina citri OX=121845 GN=LOC108253505 PE=4 SV=1	1	1	1	1	12.2	19.42	4513.2		4171.1	4342.15	124320	178740	91088	131383	0.0330496	0.0309045
A0A1S3DBS1	Uncharacterized protein LOC103515362	LOC103515362		tr|A0A1S3DBS1|A0A1S3DBS1_DIACI	tr|A0A1S3DBS1|A0A1S3DBS1_DIACI Uncharacterized protein LOC103515362 OS=Diaphorina citri OX=121845 GN=LOC103515362 PE=4 SV=1	1	5	5	5	23.1	58.698	3834.1	6697.7	2312.3	4281.37	1312800	849700	794550	985683	0.00434355	0.00394987
A0A1S2X8S3	Large ribosomal subunit protein uL22	Rpl17		tr|A0A1S2X8S3|A0A1S2X8S3_DIACI;sp|Q0PXV9|RL17_DIACI	tr|A0A1S2X8S3|A0A1S2X8S3_DIACI Large ribosomal subunit protein uL22 OS=Diaphorina citri OX=121845 GN=Rpl17 PE=3 SV=1;sp|Q0PXV9|RL17_DIACI Large ribosomal subunit protein uL22 OS=Diaphorina citri OX=121845 GN=RpL17 PE=2 SV=1	2	5	5	5	25.9	21.676	2217300	1947900	2373600	2179600	1296900	1656100	1436400	1.46313e+06	1.48968	0.0115955
A0A1S3CTS2	Eukaryotic translation initiation factor 3 subunit K	LOC103505096	FUNCTION: Component of the eukaryotic translation initiation factor 3 (eIF-3) complex, which is involved in protein synthesis of a specialized repertoire of mRNAs and, together with other initiation factors, stimulates binding of mRNA and methionyl-tRNAi to the 40S ribosome. The eIF-3 complex specifically targets and initiates translation of a subset of mRNAs involved in cell proliferation. {ECO:…	tr|A0A1S3CTS2|A0A1S3CTS2_DIACI	tr|A0A1S3CTS2|A0A1S3CTS2_DIACI Eukaryotic translation initiation factor 3 subunit K OS=Diaphorina citri OX=121845 GN=LOC103505096 PE=3 SV=1	1	11	11	11	77.4	25.187	1250800	887740	1009600	1049380	484210	710130	719580	637973	1.64486	0.0352523
A0A1S3CTT7	Complex III assembly factor LYRM7	LOC103505116		tr|A0A1S3CTT7|A0A1S3CTT7_DIACI	tr|A0A1S3CTT7|A0A1S3CTT7_DIACI Complex III assembly factor LYRM7 OS=Diaphorina citri OX=121845 GN=LOC103505116 PE=4 SV=1	1	2	2	2	26	13.98	93555	104350	91080	96328.3	67508	59214	55899	60873.7	1.58243	0.00267097
A0A1S3CUK5	60S acidic ribosomal protein P0	LOC103505561	FUNCTION: Ribosomal protein P0 is the functional equivalent of E.coli protein L10. {ECO:0000256|PIRNR:PIRNR039087}.	tr|A0A1S3CUK5|A0A1S3CUK5_DIACI;tr|A0A3Q0IK83|A0A3Q0IK83_DIACI	tr|A0A1S3CUK5|A0A1S3CUK5_DIACI 60S acidic ribosomal protein P0 OS=Diaphorina citri OX=121845 GN=LOC103505561 PE=3 SV=1	2	12	12	4	60.8	34.124	5893400	5097800	6711700	5.90097e+06	4005900	4488100	4492000	4.32867e+06	1.36323	0.033254
A0A1S3CUS1	High mobility group B protein 7-like	LOC103505639		tr|A0A1S3CUS1|A0A1S3CUS1_DIACI	tr|A0A1S3CUS1|A0A1S3CUS1_DIACI High mobility group B protein 7-like OS=Diaphorina citri OX=121845 GN=LOC103505639 PE=4 SV=1	1	3	3	3	26.4	17.407	170780	155660	157890	161443	264750	207570	302000	258107	0.625491	0.0256004
A0A1S3CV23	Solute carrier family 2, facilitated glucose transporter member 1 isoform X2	LOC103505775		tr|A0A1S3CV23|A0A1S3CV23_DIACI;tr|A0A1S3CWD1|A0A1S3CWD1_DIACI	tr|A0A1S3CV23|A0A1S3CV23_DIACI Solute carrier family 2, facilitated glucose transporter member 1 isoform X2 OS=Diaphorina citri OX=121845 GN=LOC103505775 PE=3 SV=1;tr|A0A1S3CWD1|A0A1S3CWD1_DIACI Solute carrier family 2, facilitated glucose transporter memb	2	3	3	3	9	54.123	164030	121430	134570	140010	86033	108260	89239	94510.7	1.48142	0.0340412
A0A1S3D3P8	Small ribosomal subunit protein bS16m	LOC103510815		tr|A0A1S3D3P8|A0A1S3D3P8_DIACI;tr|A0A1S3CVN1|A0A1S3CVN1_DIACI	tr|A0A1S3D3P8|A0A1S3D3P8_DIACI Small ribosomal subunit protein bS16m OS=Diaphorina citri OX=121845 GN=LOC103510815 PE=3 SV=1;tr|A0A1S3CVN1|A0A1S3CVN1_DIACI Small ribosomal subunit protein bS16m OS=Diaphorina citri OX=121845 GN=LOC103506107 PE=3 SV=1	2	3	3	3	32.2	16.897	63683	67930	58028	63213.7	35173	41724	45155	40684	1.55377	0.00533955
A0A1S3CX13	Carboxylic ester hydrolase	LOC103506174		tr|A0A1S3CX13|A0A1S3CX13_DIACI;tr|A0A1S3CVP2|A0A1S3CVP2_DIACI;tr|A0A1S3DJM7|A0A1S3DJM7_DIACI	tr|A0A1S3CX13|A0A1S3CX13_DIACI Carboxylic ester hydrolase OS=Diaphorina citri OX=121845 GN=LOC103506174 PE=3 SV=1;tr|A0A1S3CVP2|A0A1S3CVP2_DIACI Carboxylic ester hydrolase OS=Diaphorina citri OX=121845 GN=LOC103506174 PE=3 SV=1	3	17	17	17	51.7	61.724	1273400	1553900	1008300	1.27853e+06	2042500	2135900	2429800	2.20273e+06	0.58043	0.00920932
A0A1S3CW20	Uncharacterized protein LOC103506399 isoform X1	LOC103506399		tr|A0A1S3CW20|A0A1S3CW20_DIACI	tr|A0A1S3CW20|A0A1S3CW20_DIACI Uncharacterized protein LOC103506399 isoform X1 OS=Diaphorina citri OX=121845 GN=LOC103506399 PE=4 SV=1	1	7	7	7	28.8	40.108	265550	217330	202680	228520	110150	182520	137320	143330	1.59436	0.0399274
A0A1S3CW84	26S proteasome non-ATPase regulatory subunit 14-like	LOC103505718		tr|A0A1S3CW84|A0A1S3CW84_DIACI;tr|A0A3Q0IKT0|A0A3Q0IKT0_DIACI	tr|A0A1S3CW84|A0A1S3CW84_DIACI 26S proteasome non-ATPase regulatory subunit 14-like OS=Diaphorina citri OX=121845 GN=LOC103505718 PE=4 SV=1;tr|A0A3Q0IKT0|A0A3Q0IKT0_DIACI 26S proteasome non-ATPase regulatory subunit 14 OS=Diaphorina citri OX=121845 GN=LOC1	2	4	4	4	46	13.271	174990	193220	209820	192677	140620	158920	160770	153437	1.25574	0.0303025
A0A1S3CWL3	Gamma-interferon-inducible lysosomal thiol reductase-like	LOC103506626		tr|A0A1S3CWL3|A0A1S3CWL3_DIACI;tr|A0A3Q0IQV2|A0A3Q0IQV2_DIACI	tr|A0A1S3CWL3|A0A1S3CWL3_DIACI Gamma-interferon-inducible lysosomal thiol reductase-like OS=Diaphorina citri OX=121845 GN=LOC103506626 PE=3 SV=1;tr|A0A3Q0IQV2|A0A3Q0IQV2_DIACI Gamma-interferon-inducible lysosomal thiol reductase-like OS=Diaphorina citri OX	2	10	10	10	55.2	23.938	2679000	2427900	2892800	2.66657e+06	2133900	2301300	2255000	2.23007e+06	1.19573	0.0381902
A0A1S3CWL5	Uncharacterized protein LOC103506676	LOC103506676		tr|A0A1S3CWL5|A0A1S3CWL5_DIACI	tr|A0A1S3CWL5|A0A1S3CWL5_DIACI Uncharacterized protein LOC103506676 OS=Diaphorina citri OX=121845 GN=LOC103506676 PE=3 SV=2	1	7	7	7	17.3	59.11	838300	759340	581500	726380	407320	538600	449510	465143	1.56163	0.0374743
A0A1S3CWM4	NADH dehydrogenase [ubiquinone] 1 alpha subcomplex subunit 11	LOC103506691		tr|A0A1S3CWM4|A0A1S3CWM4_DIACI	tr|A0A1S3CWM4|A0A1S3CWM4_DIACI NADH dehydrogenase [ubiquinone] 1 alpha subcomplex subunit 11 OS=Diaphorina citri OX=121845 GN=LOC103506691 PE=3 SV=1	1	5	5	5	46.3	21.347	2385800	3150000	2766900	2.76757e+06	1863200	2030900	2246700	2.04693e+06	1.35206	0.0433272
A0A1S3CWW5	Alpha-actinin, sarcomeric-like	LOC103506762		tr|A0A1S3CWW5|A0A1S3CWW5_DIACI	tr|A0A1S3CWW5|A0A1S3CWW5_DIACI Alpha-actinin, sarcomeric-like OS=Diaphorina citri OX=121845 GN=LOC103506762 PE=4 SV=1	1	18	18	18	71.4	33.45	20268000	16784000	16574000	1.78753e+07	10246000	13094000	13541000	1.22937e+07	1.45403	0.0242237
A0A1S3CX11	Succinate--CoA ligase [ADP/GDP-forming] subunit alpha, mitochondrial	LOC103506896	FUNCTION: Succinyl-CoA synthetase functions in the citric acid cycle (TCA), coupling the hydrolysis of succinyl-CoA to the synthesis of either ATP or GTP and thus represents the only step of substrate-level phosphorylation in the TCA. The alpha subunit of the enzyme binds the substrates coenzyme A and phosphate, while succinate binding and specificity for either ATP or GTP is provided by differen…	tr|A0A1S3CX11|A0A1S3CX11_DIACI	tr|A0A1S3CX11|A0A1S3CX11_DIACI Succinate--CoA ligase [ADP/GDP-forming] subunit alpha, mitochondrial OS=Diaphorina citri OX=121845 GN=LOC103506896 PE=3 SV=1	1	13	13	13	52.5	35.493	28371000	28458000	25792000	2.75403e+07	21407000	23023000	19906000	2.14453e+07	1.28421	0.00829781
A0A1S3CXT8	Succinate--CoA ligase [ADP-forming] subunit beta, mitochondrial	LOC103507361	FUNCTION: ATP-specific succinyl-CoA synthetase functions in the citric acid cycle (TCA), coupling the hydrolysis of succinyl-CoA to the synthesis of ATP and thus represents the only step of substrate-level phosphorylation in the TCA. The beta subunit provides nucleotide specificity of the enzyme and binds the substrate succinate, while the binding sites for coenzyme A and phosphate are found in t…	tr|A0A1S3CXT8|A0A1S3CXT8_DIACI	tr|A0A1S3CXT8|A0A1S3CXT8_DIACI Succinate--CoA ligase [ADP-forming] subunit beta, mitochondrial OS=Diaphorina citri OX=121845 GN=LOC103507361 PE=3 SV=1	1	20	20	20	61.9	47.682	23228000	22746000	23249000	2.30743e+07	12385000	14988000	16682000	14685000	1.57129	0.00264608
A0A1S3CY61	Lachesin-like	LOC103507544		tr|A0A1S3CY61|A0A1S3CY61_DIACI	tr|A0A1S3CY61|A0A1S3CY61_DIACI Lachesin-like OS=Diaphorina citri OX=121845 GN=LOC103507544 PE=4 SV=1	1	3	3	3	30.6	15.929	358670	588990	409430	452363	913760	731770	733360	792963	0.570472	0.0210573
A0A6G5VBN5	ATP-binding cassette transporter	ABCG8		tr|A0A6G5VBN5|A0A6G5VBN5_DIACI;tr|A0A1S3CYT8|A0A1S3CYT8_DIACI	tr|A0A6G5VBN5|A0A6G5VBN5_DIACI ATP-binding cassette transporter OS=Diaphorina citri OX=121845 GN=ABCG8 PE=2 SV=1;tr|A0A1S3CYT8|A0A1S3CYT8_DIACI ATP-binding cassette sub-family G member 5 OS=Diaphorina citri OX=121845 GN=LOC103507184 PE=2 SV=2	2	6	6	6	11.7	66.637	205010	173990	214520	197840	150600	111030	126920	129517	1.52753	0.0152324
A0A1S3CYX2	Cuticle protein 7-like	LOC103507855		tr|A0A1S3CYX2|A0A1S3CYX2_DIACI	tr|A0A1S3CYX2|A0A1S3CYX2_DIACI Cuticle protein 7-like OS=Diaphorina citri OX=121845 GN=LOC103507855 PE=4 SV=1	1	6	6	6	60.4	14.954	1876500	1289400	1452400	1.53943e+06	3207500	2440100	2494700	2714100	0.567198	0.0178637
A0A1S3CZ07	Peroxiredoxin-5	LOC103507956	FUNCTION: Thiol-specific peroxidase that catalyzes the reduction of hydrogen peroxide and organic hydroperoxides to water and alcohols, respectively. Plays a role in cell protection against oxidative stress by detoxifying peroxides. {ECO:0000256|RuleBase:RU366011}.	tr|A0A1S3CZ07|A0A1S3CZ07_DIACI;tr|A0A3Q0IQB7|A0A3Q0IQB7_DIACI	tr|A0A1S3CZ07|A0A1S3CZ07_DIACI Peroxiredoxin-5 OS=Diaphorina citri OX=121845 GN=LOC103507956 PE=3 SV=1;tr|A0A3Q0IQB7|A0A3Q0IQB7_DIACI thioredoxin-dependent peroxiredoxin OS=Diaphorina citri OX=121845 GN=LOC103507966 PE=3 SV=1	2	11	11	11	75.3	18.927	10309000	11043000	11176000	1.08427e+07	9391900	7968500	6642600	8001000	1.35516	0.02754
A0A1S3CZ10	Proteasome subunit beta	LOC103507970		tr|A0A1S3CZ10|A0A1S3CZ10_DIACI	tr|A0A1S3CZ10|A0A1S3CZ10_DIACI Proteasome subunit beta OS=Diaphorina citri OX=121845 GN=LOC103507970 PE=3 SV=1	1	6	6	6	22.2	31.264	565280	444990	482220	497497	365170	393730	402630	387177	1.28493	0.0416754
A0A1S3CZ68	Small ribosomal subunit protein uS17	LOC103508035		tr|A0A1S3CZ68|A0A1S3CZ68_DIACI;tr|A0A1S4EAV4|A0A1S4EAV4_DIACI	tr|A0A1S3CZ68|A0A1S3CZ68_DIACI Small ribosomal subunit protein uS17 OS=Diaphorina citri OX=121845 GN=LOC103508035 PE=3 SV=1;tr|A0A1S4EAV4|A0A1S4EAV4_DIACI Small ribosomal subunit protein uS17 OS=Diaphorina citri OX=121845 GN=LOC103508035 PE=3 SV=1	2	7	7	7	40.8	17.766	3377000	2148300	2552300	2.69253e+06	1623200	1596700	1646300	1.62207e+06	1.65994	0.0416216
A0A1S3CZC3	Inter-alpha-trypsin inhibitor heavy chain H6-like	LOC103508164		tr|A0A1S3CZC3|A0A1S3CZC3_DIACI	tr|A0A1S3CZC3|A0A1S3CZC3_DIACI Inter-alpha-trypsin inhibitor heavy chain H6-like OS=Diaphorina citri OX=121845 GN=LOC103508164 PE=4 SV=2	1	4	1	1	40.8	17.196	659720	508230	518800	562250	269700	300670	288610	286327	1.96367	0.00513407
A0A1S3CZD2	ATPase ASNA1 homolog	LOC103508199	FUNCTION: ATPase required for the post-translational delivery of tail-anchored (TA) proteins to the endoplasmic reticulum. Recognizes and selectively binds the transmembrane domain of TA proteins in the cytosol. This complex then targets to the endoplasmic reticulum by membrane-bound receptors, where the tail-anchored protein is released for insertion. This process is regulated by ATP binding and…	tr|A0A1S3CZD2|A0A1S3CZD2_DIACI;tr|A0A3Q0JL26|A0A3Q0JL26_DIACI	tr|A0A1S3CZD2|A0A1S3CZD2_DIACI ATPase ASNA1 homolog OS=Diaphorina citri OX=121845 GN=LOC103508199 PE=3 SV=1	2	7	7	7	29.2	38.694	347480	284020	333470	321657	191740	233980	270010	231910	1.38699	0.039094
A0A1S3CZD9	STI1 domain-containing protein	LOC103507510		tr|A0A1S3CZD9|A0A1S3CZD9_DIACI	tr|A0A1S3CZD9|A0A1S3CZD9_DIACI STI1 domain-containing protein OS=Diaphorina citri OX=121845 GN=LOC103507510 PE=3 SV=1	1	11	11	11	32.9	41.688	563700	570740	573500	569313	1457600	1068700	791700	1106000	0.51475	0.0498924
A0A1S3CZW7	Trifunctional enzyme subunit alpha, mitochondrial-like	LOC103508477		tr|A0A1S3CZW7|A0A1S3CZW7_DIACI;tr|A0A3Q0IW67|A0A3Q0IW67_DIACI	tr|A0A1S3CZW7|A0A1S3CZW7_DIACI Trifunctional enzyme subunit alpha, mitochondrial-like OS=Diaphorina citri OX=121845 GN=LOC103508477 PE=4 SV=1	2	15	15	13	73	29.237	6252500	5250400	4802800	5.43523e+06	4084800	3990000	4397900	4.15757e+06	1.30731	0.0456944
A0A1S3D0D0	Uncharacterized protein LOC103508781	LOC103508781		tr|A0A1S3D0D0|A0A1S3D0D0_DIACI	tr|A0A1S3D0D0|A0A1S3D0D0_DIACI Uncharacterized protein LOC103508781 OS=Diaphorina citri OX=121845 GN=LOC103508781 PE=4 SV=1	1	1	1	1	6.4	28.306	45189	31197	35279	37221.7	22491	18882	24616	21996.3	1.69218	0.027291
A0A1S3D0K0	arginine kinase	LOC103508767		tr|A0A1S3D0K0|A0A1S3D0K0_DIACI;tr|A0A3Q0IXB0|A0A3Q0IXB0_DIACI;tr|A0A3Q0IX81|A0A3Q0IX81_DIACI;tr|A0A3Q0J1H2|A0A3Q0J1H2_DIACI;tr|D7PPG4|D7PPG4_DIACI	tr|A0A1S3D0K0|A0A1S3D0K0_DIACI arginine kinase OS=Diaphorina citri OX=121845 GN=LOC103508767 PE=3 SV=1;tr|A0A3Q0IXB0|A0A3Q0IXB0_DIACI arginine kinase OS=Diaphorina citri OX=121845 GN=LOC103508767 PE=3 SV=1;tr|A0A3Q0IX81|A0A3Q0IX81_DIACI arginine kinase OS=	5	22	22	22	58.3	36.566	58123000	63872000	66723000	62906000	48477000	49957000	54534000	5.09893e+07	1.23371	0.0187428
A0A3Q0IXG6	Calpain-B isoform X5	LOC103508959		tr|A0A3Q0IXG6|A0A3Q0IXG6_DIACI;tr|A0A1S3D0P2|A0A1S3D0P2_DIACI;tr|A0A1S3D0R0|A0A1S3D0R0_DIACI	tr|A0A3Q0IXG6|A0A3Q0IXG6_DIACI Calpain-B isoform X5 OS=Diaphorina citri OX=121845 GN=LOC103508959 PE=3 SV=1;tr|A0A1S3D0P2|A0A1S3D0P2_DIACI Calpain-A isoform X1 OS=Diaphorina citri OX=121845 GN=LOC103508959 PE=3 SV=1;tr|A0A1S3D0R0|A0A1S3D0R0_DIACI Calpain-A	3	24	24	24	41.5	86.586	1960200	1815400	1833800	1869800	1052100	1479800	1587100	1373000	1.36184	0.0428694
A0A1S3D0Y4	Uncharacterized protein LOC103509115	LOC103509115		tr|A0A1S3D0Y4|A0A1S3D0Y4_DIACI	tr|A0A1S3D0Y4|A0A1S3D0Y4_DIACI Uncharacterized protein LOC103509115 OS=Diaphorina citri OX=121845 GN=LOC103509115 PE=4 SV=1	1	2	2	2	14.9	14.612		58804	103670	81237	179620	156130	143830	159860	0.508176	0.0354225
A0A1S3D183	Proteasome subunit alpha type-7-1	LOC103509367		tr|A0A1S3D183|A0A1S3D183_DIACI	tr|A0A1S3D183|A0A1S3D183_DIACI Proteasome subunit alpha type-7-1 OS=Diaphorina citri OX=121845 GN=LOC103509367 PE=3 SV=1	1	3	3	3	26.6	20.244	691470	653970	629960	658467	484440	472540	518890	491957	1.33846	0.00182666
A0A1S3D1U6	Facilitated trehalose transporter Tret1-like	LOC103509582		tr|A0A1S3D1U6|A0A1S3D1U6_DIACI	tr|A0A1S3D1U6|A0A1S3D1U6_DIACI Facilitated trehalose transporter Tret1-like OS=Diaphorina citri OX=121845 GN=LOC103509582 PE=4 SV=1	1	4	4	4	12.4	57.975	198440	153230	189760	180477	98356	90886	108580	99274	1.81797	0.00533673
A0A1S3D1V5	Striatin-3	LOC103509697		tr|A0A1S3D1V5|A0A1S3D1V5_DIACI;tr|A0A3Q0IYN5|A0A3Q0IYN5_DIACI;tr|A0A1S3D1T8|A0A1S3D1T8_DIACI	tr|A0A1S3D1V5|A0A1S3D1V5_DIACI Striatin-3 OS=Diaphorina citri OX=121845 GN=LOC103509697 PE=4 SV=1;tr|A0A3Q0IYN5|A0A3Q0IYN5_DIACI Striatin-3-like OS=Diaphorina citri OX=121845 GN=LOC103509698 PE=4 SV=1	3	3	3	3	8.7	64.183	96330	92249	103890	97489.7	167170	118910	137940	141340	0.689753	0.0385506
A0A1S3DR45	Bifunctional coenzyme A synthase-like	LOC103522925		tr|A0A1S3DR45|A0A1S3DR45_DIACI;tr|A0A1S3D1W9|A0A1S3D1W9_DIACI	tr|A0A1S3DR45|A0A1S3DR45_DIACI Bifunctional coenzyme A synthase-like OS=Diaphorina citri OX=121845 GN=LOC103522925 PE=4 SV=1;tr|A0A1S3D1W9|A0A1S3D1W9_DIACI Bifunctional coenzyme A synthase-like OS=Diaphorina citri OX=121845 GN=LOC103509690 PE=4 SV=1	2	3	3	3	15.3	22.551	168370	173500	161840	167903	133170	143850	140430	139150	1.20664	0.00338046
A0A1S3D2D0	6-phosphogluconate dehydrogenase, decarboxylating	LOC103510040		tr|A0A1S3D2D0|A0A1S3D2D0_DIACI	tr|A0A1S3D2D0|A0A1S3D2D0_DIACI 6-phosphogluconate dehydrogenase, decarboxylating OS=Diaphorina citri OX=121845 GN=LOC103510040 PE=3 SV=1	1	13	13	13	59.6	37.711	4373400	4020600	4033500	4142500	3238700	3841800	3521500	3534000	1.17218	0.04363
A0A1S3D2G9	60S ribosomal protein L7a	LOC103509200	FUNCTION: Component of the ribosome. {ECO:0000256|RuleBase:RU367042}.	tr|A0A1S3D2G9|A0A1S3D2G9_DIACI;tr|Q0PWV1|Q0PWV1_DIACI	tr|A0A1S3D2G9|A0A1S3D2G9_DIACI 60S ribosomal protein L7a OS=Diaphorina citri OX=121845 GN=LOC103509200 PE=3 SV=1;tr|Q0PWV1|Q0PWV1_DIACI 60S ribosomal protein L7a (Fragment) OS=Diaphorina citri OX=121845 PE=2 SV=1	2	10	10	10	37.1	30.864	3333500	2551400	3329100	3.07133e+06	1180800	2421000	1860000	1820600	1.68699	0.0476313
A0A1S3D2I9	Translationally-controlled tumor protein homolog	LOC103509255		tr|A0A1S3D2I9|A0A1S3D2I9_DIACI;tr|A0A3Q0IT48|A0A3Q0IT48_DIACI	tr|A0A1S3D2I9|A0A1S3D2I9_DIACI Translationally-controlled tumor protein homolog OS=Diaphorina citri OX=121845 GN=LOC103509255 PE=3 SV=1;tr|A0A3Q0IT48|A0A3Q0IT48_DIACI Translationally-controlled tumor protein homolog OS=Diaphorina citri OX=121845 GN=LOC1035	2	7	7	7	56.2	16.771	2735300	2215100	2754600	2.56833e+06	1971000	1621600	1722500	1771700	1.44964	0.0177351
A0A1S3D2R0	60S ribosomal protein L10a-like	LOC103510129		tr|A0A1S3D2R0|A0A1S3D2R0_DIACI;tr|Q0PWU7|Q0PWU7_DIACI	tr|A0A1S3D2R0|A0A1S3D2R0_DIACI 60S ribosomal protein L10a-like OS=Diaphorina citri OX=121845 GN=LOC103510129 PE=4 SV=1;tr|Q0PWU7|Q0PWU7_DIACI Large ribosomal subunit protein uL1 (Fragment) OS=Diaphorina citri OX=121845 PE=2 SV=1	2	8	8	8	32.6	31.425	2478500	2297000	2684200	2.48657e+06	1505100	2015200	1769800	1.76337e+06	1.41012	0.0173879
A0A1S3D2S3	Protein transport protein Sec61 subunit alpha isoform X1	LOC103510285		tr|A0A1S3D2S3|A0A1S3D2S3_DIACI	tr|A0A1S3D2S3|A0A1S3D2S3_DIACI Protein transport protein Sec61 subunit alpha isoform X1 OS=Diaphorina citri OX=121845 GN=LOC103510285 PE=3 SV=1	1	5	5	5	17	52.311	700850	673880	772100	715610	439030	506450	416000	453827	1.57684	0.00280092
A0A1S3D320	Uncharacterized protein LOC103510441 isoform X1	LOC103510441		tr|A0A1S3D320|A0A1S3D320_DIACI;tr|A0A1S3D4J4|A0A1S3D4J4_DIACI;tr|A0A1S3DR98|A0A1S3DR98_DIACI	tr|A0A1S3D320|A0A1S3D320_DIACI Uncharacterized protein LOC103510441 isoform X1 OS=Diaphorina citri OX=121845 GN=LOC103510441 PE=4 SV=1;tr|A0A1S3D4J4|A0A1S3D4J4_DIACI Uncharacterized protein LOC103510441 isoform X2 OS=Diaphorina citri OX=121845 GN=LOC103510	3	4	4	4	25.8	28.877	1380500	1103100	1035900	1.17317e+06	863410	662580	565510	697167	1.68276	0.0255843
A0A1S3D344	Surfeit locus protein 4 homolog	LOC103510380		tr|A0A1S3D344|A0A1S3D344_DIACI	tr|A0A1S3D344|A0A1S3D344_DIACI Surfeit locus protein 4 homolog OS=Diaphorina citri OX=121845 GN=LOC103510380 PE=3 SV=1	1	6	6	6	24.3	31.912	780150	527740	627110	645000	365750	387260	429970	394327	1.6357	0.029735
A0A1S3D3L2	Uncharacterized protein LOC103509867	LOC103509867		tr|A0A1S3D3L2|A0A1S3D3L2_DIACI	tr|A0A1S3D3L2|A0A1S3D3L2_DIACI Uncharacterized protein LOC103509867 OS=Diaphorina citri OX=121845 GN=LOC103509867 PE=4 SV=1	1	3	3	3	23.8	22.454	140900	127950	179010	149287	110340	55624	58519	74827.7	1.99507	0.0337747
A0A1S3D3S4	Prohibitin	LOC103510840		tr|A0A1S3D3S4|A0A1S3D3S4_DIACI	tr|A0A1S3D3S4|A0A1S3D3S4_DIACI Prohibitin OS=Diaphorina citri OX=121845 GN=LOC103510840 PE=3 SV=1	1	11	11	11	52.5	29.062	5887300	4481800	4319800	4896300	3084000	3053900	3272400	3.13677e+06	1.56094	0.0248416
A0A1S4ED76	Sorting nexin	LOC103510348	FUNCTION: Involved in several stages of intracellular trafficking. {ECO:0000256|PIRNR:PIRNR036924}.	tr|A0A1S4ED76|A0A1S4ED76_DIACI;tr|A0A1S3D4C7|A0A1S3D4C7_DIACI	tr|A0A1S4ED76|A0A1S4ED76_DIACI Sorting nexin OS=Diaphorina citri OX=121845 GN=LOC103510348 PE=3 SV=1;tr|A0A1S3D4C7|A0A1S3D4C7_DIACI Sorting nexin OS=Diaphorina citri OX=121845 GN=LOC103510348 PE=3 SV=1	2	8	8	8	32.5	48.005	356780	366910	351310	358333	244010	290120	273630	269253	1.33084	0.00333248
A0A1S3D4M5	c-Myc-binding protein homolog	LOC103511242		tr|A0A1S3D4M5|A0A1S3D4M5_DIACI	tr|A0A1S3D4M5|A0A1S3D4M5_DIACI c-Myc-binding protein homolog OS=Diaphorina citri OX=121845 GN=LOC103511242 PE=3 SV=1	1	3	3	3	32.7	16.527	535910	791870	767780	698520	1221500	964240	1390300	1.19201e+06	0.586	0.0291908
A0A1S3D4Z0	Protein Mo25	LOC103511589		tr|A0A1S3D4Z0|A0A1S3D4Z0_DIACI	tr|A0A1S3D4Z0|A0A1S3D4Z0_DIACI Protein Mo25 OS=Diaphorina citri OX=121845 GN=LOC103511589 PE=3 SV=1	1	1	1	1	6.8	17.75	112670	102080	100160	104970	76590	71643	73807	74013.3	1.41826	0.00171778
A0A1S3D504	DNA-directed RNA polymerases I, II, and III subunit RPABC3	LOC103510689	FUNCTION: DNA-dependent RNA polymerase catalyzes the transcription of DNA into RNA using the four ribonucleoside triphosphates as substrates. Common component of RNA polymerases I, II and III which synthesize ribosomal RNA precursors, mRNA precursors and many functional non-coding RNAs, and small RNAs, such as 5S rRNA and tRNAs, respectively. {ECO:0000256|PIRNR:PIRNR000779}.	tr|A0A1S3D504|A0A1S3D504_DIACI	tr|A0A1S3D504|A0A1S3D504_DIACI DNA-directed RNA polymerases I, II, and III subunit RPABC3 OS=Diaphorina citri OX=121845 GN=LOC103510689 PE=3 SV=1	1	1	1	1	8	17.224	36338	28263	30544	31715	22808	9454.6	19255	17172.5	1.84684	0.035514
A0A1S3D557	3-hydroxyacyl-CoA dehydrogenase type-2	LOC103511570		tr|A0A1S3D557|A0A1S3D557_DIACI	tr|A0A1S3D557|A0A1S3D557_DIACI 3-hydroxyacyl-CoA dehydrogenase type-2 OS=Diaphorina citri OX=121845 GN=LOC103511570 PE=3 SV=1	1	12	12	12	70.1	26.972	1549500	1505100	1556700	1537100	1390700	1410200	1495400	1432100	1.07332	0.043277
A0A1S3D5F9	Phosphoglycerate kinase	LOC103510946		tr|A0A1S3D5F9|A0A1S3D5F9_DIACI;tr|A0A1S3D3Y6|A0A1S3D3Y6_DIACI	tr|A0A1S3D5F9|A0A1S3D5F9_DIACI Phosphoglycerate kinase OS=Diaphorina citri OX=121845 GN=LOC103510946 PE=3 SV=1;tr|A0A1S3D3Y6|A0A1S3D3Y6_DIACI Phosphoglycerate kinase OS=Diaphorina citri OX=121845 GN=LOC103510946 PE=3 SV=1	2	28	28	28	75.2	44.789	45770000	36475000	35136000	39127000	29561000	26916000	26751000	2.77427e+07	1.41035	0.03036
A0A1S3D5I9	Eukaryotic translation initiation factor 3 subunit D	LOC103511871	FUNCTION: mRNA cap-binding component of the eukaryotic translation initiation factor 3 (eIF-3) complex, which is involved in protein synthesis of a specialized repertoire of mRNAs and, together with other initiation factors, stimulates binding of mRNA and methionyl-tRNAi to the 40S ribosome. The eIF-3 complex specifically targets and initiates translation of a subset of mRNAs involved in cell pro…	tr|A0A1S3D5I9|A0A1S3D5I9_DIACI;tr|A0A1S3DSW4|A0A1S3DSW4_DIACI	tr|A0A1S3D5I9|A0A1S3D5I9_DIACI Eukaryotic translation initiation factor 3 subunit D OS=Diaphorina citri OX=121845 GN=LOC103511871 PE=3 SV=1;tr|A0A1S3DSW4|A0A1S3DSW4_DIACI Eukaryotic translation initiation factor 3 subunit p66 OS=Diaphorina citri OX=121845	2	10	10	10	36.1	62.895	909390	734980	839150	827840	580710	618980	673700	624463	1.32568	0.0239483
A0A1S3D5P5	Large ribosomal subunit protein uL18	LOC103511085		tr|A0A1S3D5P5|A0A1S3D5P5_DIACI	tr|A0A1S3D5P5|A0A1S3D5P5_DIACI Large ribosomal subunit protein uL18 OS=Diaphorina citri OX=121845 GN=LOC103511085 PE=3 SV=1	1	12	12	12	45.6	34.906	4390700	4788800	5383800	4.85443e+06	3131700	3671100	3386800	3.39653e+06	1.42923	0.0112828
A0A3Q0IYK5	Short/branched chain specific acyl-CoA dehydrogenase, mitochondrial isoform X3	LOC103511898		tr|A0A3Q0IYK5|A0A3Q0IYK5_DIACI;tr|A0A1S4EEX7|A0A1S4EEX7_DIACI;tr|A0A1S3D5S6|A0A1S3D5S6_DIACI	tr|A0A3Q0IYK5|A0A3Q0IYK5_DIACI Short/branched chain specific acyl-CoA dehydrogenase, mitochondrial isoform X3 OS=Diaphorina citri OX=121845 GN=LOC103511898 PE=3 SV=1;tr|A0A1S4EEX7|A0A1S4EEX7_DIACI Short/branched chain specific acyl-CoA dehydrogenase, mitoc	3	10	10	10	37.5	45.517	677720	764530	652150	698133	891560	877620	892130	887103	0.786981	0.00531706
A0A1S3D651	60S ribosomal protein L44	LOC103512114		tr|A0A1S3D651|A0A1S3D651_DIACI	tr|A0A1S3D651|A0A1S3D651_DIACI 60S ribosomal protein L44 OS=Diaphorina citri OX=121845 GN=LOC103512114 PE=3 SV=1	1	2	2	2	20.2	12.518	787420	535290	645690	656133	390130	431720	380740	400863	1.6368	0.0267721
A0A1S3D6S2	Small nuclear ribonucleoprotein E	LOC103512593	FUNCTION: Associated with the spliceosome snRNP U1, U2, U4/U6 and U5. {ECO:0000256|RuleBase:RU365053}.	tr|A0A1S3D6S2|A0A1S3D6S2_DIACI;tr|A0A3Q0J011|A0A3Q0J011_DIACI	tr|A0A1S3D6S2|A0A1S3D6S2_DIACI Small nuclear ribonucleoprotein E OS=Diaphorina citri OX=121845 GN=LOC103512593 PE=3 SV=1;tr|A0A3Q0J011|A0A3Q0J011_DIACI Small nuclear ribonucleoprotein E OS=Diaphorina citri OX=121845 GN=LOC103512593 PE=3 SV=1	2	3	3	3	54.1	11.353	576830	564840	667330	603000	394380	516570	377230	429393	1.40431	0.0333743
A0A1S3D6T6	J domain-containing protein	LOC103512654		tr|A0A1S3D6T6|A0A1S3D6T6_DIACI	tr|A0A1S3D6T6|A0A1S3D6T6_DIACI J domain-containing protein OS=Diaphorina citri OX=121845 GN=LOC103512654 PE=4 SV=1	1	4	4	4	36.4	19.866	153360	114140	129500	132333	252100	267670	204580	241450	0.548078	0.00788315
A0A1S3D6Y2	Deoxynucleoside triphosphate triphosphohydrolase SAMHD1	LOC103512752		tr|A0A1S3D6Y2|A0A1S3D6Y2_DIACI	tr|A0A1S3D6Y2|A0A1S3D6Y2_DIACI Deoxynucleoside triphosphate triphosphohydrolase SAMHD1 OS=Diaphorina citri OX=121845 GN=LOC103512752 PE=4 SV=1	1	10	10	10	62.5	29.867	3976200	4327300	4617700	4.30707e+06	1948500	2505500	2233800	2.22927e+06	1.93206	0.00106747
A0A1S3D726	La protein homolog isoform X1	LOC103511897		tr|A0A1S3D726|A0A1S3D726_DIACI	tr|A0A1S3D726|A0A1S3D726_DIACI La protein homolog isoform X1 OS=Diaphorina citri OX=121845 GN=LOC103511897 PE=4 SV=1	1	7	7	7	28.2	44.384	1039600	663850	825130	842860	496070	525010	357020	459367	1.83483	0.0334984
A0A1S3D745	Dystonin-like	LOC103512691		tr|A0A1S3D745|A0A1S3D745_DIACI;tr|A0A3Q0JNR7|A0A3Q0JNR7_DIACI	tr|A0A1S3D745|A0A1S3D745_DIACI Dystonin-like OS=Diaphorina citri OX=121845 GN=LOC103512691 PE=4 SV=1;tr|A0A3Q0JNR7|A0A3Q0JNR7_DIACI Dystonin OS=Diaphorina citri OX=121845 GN=LOC103523674 PE=4 SV=1	2	2	2	2	7.3	50.658	119810	112620	124110	118847	56281	76019	75798	69366	1.71333	0.00253818
A0A1S3D7F8	Calponin	LOC103513027	FUNCTION: Thin filament-associated protein that is implicated in the regulation and modulation of smooth muscle contraction. It is capable of binding to actin, calmodulin, troponin C and tropomyosin. The interaction of calponin with actin inhibits the actomyosin Mg-ATPase activity. {ECO:0000256|RuleBase:RU361224}.	tr|A0A1S3D7F8|A0A1S3D7F8_DIACI	tr|A0A1S3D7F8|A0A1S3D7F8_DIACI Calponin OS=Diaphorina citri OX=121845 GN=LOC103513027 PE=3 SV=1	1	11	11	11	71.6	19.158	5614900	6491800	5820200	5.97563e+06	9426200	7988100	6929900	8.11473e+06	0.736393	0.0499802
A0A3Q0IZJ8	39S ribosomal protein L13, mitochondrial-like	LOC103512455		tr|A0A3Q0IZJ8|A0A3Q0IZJ8_DIACI;tr|A0A1S3D7P3|A0A1S3D7P3_DIACI	tr|A0A3Q0IZJ8|A0A3Q0IZJ8_DIACI 39S ribosomal protein L13, mitochondrial-like OS=Diaphorina citri OX=121845 GN=LOC103512455 PE=3 SV=1;tr|A0A1S3D7P3|A0A1S3D7P3_DIACI 39S ribosomal protein L13, mitochondrial OS=Diaphorina citri OX=121845 GN=LOC103512279 PE=3	2	2	2	2	18.4	16.026		34150	28741	31445.5	17125	19609	24529	20421	1.53986	0.0497538
A0A1S3D7R1	NADH dehydrogenase [ubiquinone] 1 alpha subcomplex subunit 13	LOC103513178		tr|A0A1S3D7R1|A0A1S3D7R1_DIACI	tr|A0A1S3D7R1|A0A1S3D7R1_DIACI NADH dehydrogenase [ubiquinone] 1 alpha subcomplex subunit 13 OS=Diaphorina citri OX=121845 GN=LOC103513178 PE=3 SV=1	1	7	7	7	50.3	18.017	3522700	3054600	2729700	3.10233e+06	1757100	1803100	1974300	1.84483e+06	1.68163	0.00629108
A0A1S3D812	von Willebrand factor A domain-containing protein 8	LOC103513327		tr|A0A1S3D812|A0A1S3D812_DIACI	tr|A0A1S3D812|A0A1S3D812_DIACI von Willebrand factor A domain-containing protein 8 OS=Diaphorina citri OX=121845 GN=LOC103513327 PE=4 SV=1	1	2	2	2	11.3	37.176	33256	35008	23078	30447.3	42520	46499	48400	45806.3	0.664697	0.0200607
A0A1S3D8P7	Solute carrier family 12 member 4-like	LOC103512913		tr|A0A1S3D8P7|A0A1S3D8P7_DIACI	tr|A0A1S3D8P7|A0A1S3D8P7_DIACI Solute carrier family 12 member 4-like OS=Diaphorina citri OX=121845 GN=LOC103512913 PE=4 SV=1	1	6	2	2	12	86.317	81184	86546	86645	84791.7	65555	67658	72432	68548.3	1.23696	0.0039457
A0A1S4EQX1	Uncharacterized protein LOC103522735	LOC103522735		tr|A0A1S4EQX1|A0A1S4EQX1_DIACI;tr|A0A1S3D8Q0|A0A1S3D8Q0_DIACI	tr|A0A1S4EQX1|A0A1S4EQX1_DIACI Uncharacterized protein LOC103522735 OS=Diaphorina citri OX=121845 GN=LOC103522735 PE=4 SV=1;tr|A0A1S3D8Q0|A0A1S3D8Q0_DIACI Uncharacterized protein LOC103513672 isoform X1 OS=Diaphorina citri OX=121845 GN=LOC103513672 PE=4 SV	2	2	2	2	18.5	12.749	177480	156220	163440	165713	117250	124740	145350	129113	1.28347	0.0249641
A0A1S3D8U7	signal peptidase I	LOC103513626		tr|A0A1S3D8U7|A0A1S3D8U7_DIACI	tr|A0A1S3D8U7|A0A1S3D8U7_DIACI signal peptidase I OS=Diaphorina citri OX=121845 GN=LOC103513626 PE=3 SV=1	1	3	3	1	25.2	11.737	298890	250910	284580	278127	202170	199750	218390	206770	1.3451	0.00973361
A0A1S3D8W9	gamma-glutamylcyclotransferase	LOC103513801		tr|A0A1S3D8W9|A0A1S3D8W9_DIACI;tr|A0A3Q0JJG7|A0A3Q0JJG7_DIACI	tr|A0A1S3D8W9|A0A1S3D8W9_DIACI gamma-glutamylcyclotransferase OS=Diaphorina citri OX=121845 GN=LOC103513801 PE=4 SV=1	2	4	4	4	36.2	24.875	210640	335560	303940	283380	460180	488930	384980	444697	0.637243	0.029486
A0A1S3D918	Lysosomal Pro-X carboxypeptidase-like	LOC103513849		tr|A0A1S3D918|A0A1S3D918_DIACI	tr|A0A1S3D918|A0A1S3D918_DIACI Lysosomal Pro-X carboxypeptidase-like OS=Diaphorina citri OX=121845 GN=LOC103513849 PE=3 SV=1	1	4	4	4	9.3	63.433	196700	138130	158860	164563	99555	99262	75901	91572.7	1.79708	0.0179674
A0A1S3DTJ5	Protoporphyrinogen oxidase	LOC103524025	FUNCTION: Catalyzes the 6-electron oxidation of protoporphyrinogen-IX to form protoporphyrin-IX. {ECO:0000256|RuleBase:RU364052}.	tr|A0A1S3DTJ5|A0A1S3DTJ5_DIACI;tr|A0A1S3D9S5|A0A1S3D9S5_DIACI;tr|A0A1S3D9W9|A0A1S3D9W9_DIACI;tr|A0A3Q0J8V7|A0A3Q0J8V7_DIACI	tr|A0A1S3DTJ5|A0A1S3DTJ5_DIACI Protoporphyrinogen oxidase OS=Diaphorina citri OX=121845 GN=LOC103524025 PE=3 SV=2;tr|A0A1S3D9S5|A0A1S3D9S5_DIACI Protoporphyrinogen oxidase OS=Diaphorina citri OX=121845 GN=LOC103514350 PE=3 SV=1;tr|A0A1S3D9W9|A0A1S3D9W9_DIA	4	4	4	4	16.1	45.379	181460	166090	143520	163690	91254	111890	110260	104468	1.56689	0.00998045
A0A1S4EHV3	Peroxisomal (S)-2-hydroxy-acid oxidase GLO3-like isoform X2	LOC103514444		tr|A0A1S4EHV3|A0A1S4EHV3_DIACI;tr|A0A1S3DA23|A0A1S3DA23_DIACI	tr|A0A1S4EHV3|A0A1S4EHV3_DIACI Peroxisomal (S)-2-hydroxy-acid oxidase GLO3-like isoform X2 OS=Diaphorina citri OX=121845 GN=LOC103514444 PE=3 SV=1;tr|A0A1S3DA23|A0A1S3DA23_DIACI Peroxisomal (S)-2-hydroxy-acid oxidase GLO3-like isoform X1 OS=Diaphorina citr	2	9	9	9	47.1	41.516	368650	340520	379610	362927	278930	235910	261720	258853	1.40206	0.00367066
A0A1S3DAJ3	Uncharacterized protein LOC103514595 isoform X1	LOC103514595		tr|A0A1S3DAJ3|A0A1S3DAJ3_DIACI	tr|A0A1S3DAJ3|A0A1S3DAJ3_DIACI Uncharacterized protein LOC103514595 isoform X1 OS=Diaphorina citri OX=121845 GN=LOC103514595 PE=4 SV=1	1	4	4	4	37.6	22.428	134440	100220	105810	113490	179090	154370	215900	183120	0.619758	0.028555
A0A1S3DBM9	glucose-6-phosphate 1-epimerase	LOC103515205		tr|A0A1S3DBM9|A0A1S3DBM9_DIACI	tr|A0A1S3DBM9|A0A1S3DBM9_DIACI glucose-6-phosphate 1-epimerase OS=Diaphorina citri OX=121845 GN=LOC103515205 PE=3 SV=1	1	1	1	1	8.7	30.139	32406	32562	38626	34531.3	12964	21130	23937	19343.7	1.78515	0.0172747
A0A1S3DDI6	Cuticle protein 7-like	LOC103515658		tr|A0A1S3DDI6|A0A1S3DDI6_DIACI	tr|A0A1S3DDI6|A0A1S3DDI6_DIACI Cuticle protein 7-like OS=Diaphorina citri OX=121845 GN=LOC103515658 PE=4 SV=1	1	5	5	3	28.7	23.301	207720	267410	243900	239677	397960	465860	311470	391763	0.611789	0.0337583
A0A1S3DEA4	NADH dehydrogenase [ubiquinone] 1 alpha subcomplex subunit 10, mitochondrial	LOC103517007	FUNCTION: Accessory subunit of the mitochondrial membrane respiratory chain NADH dehydrogenase (Complex I), that is believed not to be involved in catalysis. Complex I functions in the transfer of electrons from NADH to the respiratory chain. The immediate electron acceptor for the enzyme is believed to be ubiquinone. {ECO:0000256|PIRNR:PIRNR000543}.	tr|A0A1S3DEA4|A0A1S3DEA4_DIACI;tr|Q0PWU3|Q0PWU3_DIACI	tr|A0A1S3DEA4|A0A1S3DEA4_DIACI NADH dehydrogenase [ubiquinone] 1 alpha subcomplex subunit 10, mitochondrial OS=Diaphorina citri OX=121845 GN=LOC103517007 PE=3 SV=1;tr|Q0PWU3|Q0PWU3_DIACI NADH dehydrogenase [ubiquinone] 1 alpha subcomplex subunit 10, mitoch	2	20	20	20	64.3	46.705	10710000	7482400	7855800	8.68273e+06	4776800	4678100	5484700	4.97987e+06	1.74357	0.0243447
A0A1S3DEI2	CRAL-TRIO domain-containing protein C3H8.02	LOC103516816		tr|A0A1S3DEI2|A0A1S3DEI2_DIACI	tr|A0A1S3DEI2|A0A1S3DEI2_DIACI CRAL-TRIO domain-containing protein C3H8.02 OS=Diaphorina citri OX=121845 GN=LOC103516816 PE=4 SV=1	1	2	2	2	10.5	26.728	106000	105870	123520	111797	47174	93689	65407	68756.7	1.62598	0.0433044
A0A1S3DEL2	alkaline phosphatase	LOC103516265		tr|A0A1S3DEL2|A0A1S3DEL2_DIACI	tr|A0A1S3DEL2|A0A1S3DEL2_DIACI alkaline phosphatase OS=Diaphorina citri OX=121845 GN=LOC103516265 PE=3 SV=1	1	22	22	22	42.7	62.786	3168300	2786700	2784400	2.91313e+06	4930000	4962000	5086300	4.99277e+06	0.583471	0.000107298
A0A1S3DEQ5	ATP-dependent RNA helicase me31b	LOC103517033		tr|A0A1S3DEQ5|A0A1S3DEQ5_DIACI;tr|A0A3Q0JDP1|A0A3Q0JDP1_DIACI	tr|A0A1S3DEQ5|A0A1S3DEQ5_DIACI ATP-dependent RNA helicase me31b OS=Diaphorina citri OX=121845 GN=LOC103517033 PE=3 SV=1	2	20	20	20	63.4	43.591	2700100	2004700	2911800	2.53887e+06	1188600	1643400	1264300	1.36543e+06	1.85939	0.018942
A0A1S3DF00	Small ribosomal subunit protein uS14	LOC103517290		tr|A0A1S3DF00|A0A1S3DF00_DIACI	tr|A0A1S3DF00|A0A1S3DF00_DIACI Small ribosomal subunit protein uS14 OS=Diaphorina citri OX=121845 GN=LOC103517290 PE=3 SV=1	1	3	3	3	48.2	6.5024	572120	397970	433830	467973	290440	328260	276100	298267	1.56898	0.0373853
A0A1S3DF15	ATP-dependent 6-phosphofructokinase-like	LOC103516511		tr|A0A1S3DF15|A0A1S3DF15_DIACI;tr|A0A3Q0J890|A0A3Q0J890_DIACI	tr|A0A1S3DF15|A0A1S3DF15_DIACI ATP-dependent 6-phosphofructokinase-like OS=Diaphorina citri OX=121845 GN=LOC103516511 PE=4 SV=1	2	6	6	6	59.9	21.358	2988000	3207300	3026500	3.07393e+06	1999200	1926600	2791000	2.23893e+06	1.37295	0.042805
A0A1S3DF64	Ubiquitin-fold modifier 1	LOC103517266	FUNCTION: Ubiquitin-like modifier. {ECO:0000256|PIRNR:PIRNR038027}.	tr|A0A1S3DF64|A0A1S3DF64_DIACI	tr|A0A1S3DF64|A0A1S3DF64_DIACI Ubiquitin-fold modifier 1 OS=Diaphorina citri OX=121845 GN=LOC103517266 PE=3 SV=1	1	3	3	3	56.7	9.6882	183640	221890	183330	196287	265100	278340	296940	280127	0.700707	0.00604081
A0A1S3DHK3	NECAP-like protein CG9132 isoform X2	LOC103517855		tr|A0A1S3DHK3|A0A1S3DHK3_DIACI;tr|A0A1S3DG10|A0A1S3DG10_DIACI;tr|A0A1S3DG14|A0A1S3DG14_DIACI;tr|A0A3Q0JDE7|A0A3Q0JDE7_DIACI	tr|A0A1S3DHK3|A0A1S3DHK3_DIACI NECAP-like protein CG9132 isoform X2 OS=Diaphorina citri OX=121845 GN=LOC103517855 PE=3 SV=1;tr|A0A1S3DG10|A0A1S3DG10_DIACI NECAP-like protein CG9132 isoform X1 OS=Diaphorina citri OX=121845 GN=LOC103517855 PE=3 SV=1;tr|A0A1S	4	4	4	4	34.1	22.839	69949	155240	129720	118303	267720	214750	187780	223417	0.529517	0.0381418
A0A1S3DGB2	Uncharacterized protein LOC103517165	LOC103517165		tr|A0A1S3DGB2|A0A1S3DGB2_DIACI;tr|A0A1S4EL12|A0A1S4EL12_DIACI	tr|A0A1S3DGB2|A0A1S3DGB2_DIACI Uncharacterized protein LOC103517165 OS=Diaphorina citri OX=121845 GN=LOC103517165 PE=4 SV=1;tr|A0A1S4EL12|A0A1S4EL12_DIACI Uncharacterized protein LOC108253428 OS=Diaphorina citri OX=121845 GN=LOC108253428 PE=4 SV=1	2	5	5	5	24.5	28.107	4084700	3336100	3105900	3508900	2402600	1851600	1932300	2.06217e+06	1.70156	0.0133397
A0A1S3DGV8	Protein lin-7 homolog C	LOC103518141		tr|A0A1S3DGV8|A0A1S3DGV8_DIACI;tr|A0A3Q0JBD2|A0A3Q0JBD2_DIACI	tr|A0A1S3DGV8|A0A1S3DGV8_DIACI Protein lin-7 homolog C OS=Diaphorina citri OX=121845 GN=LOC103518141 PE=3 SV=2;tr|A0A3Q0JBD2|A0A3Q0JBD2_DIACI Protein lin-7 homolog B-like OS=Diaphorina citri OX=121845 GN=LOC103518139 PE=4 SV=1	2	5	5	5	43.4	19.183	111960	111320	132930	118737	185270	232840	179210	199107	0.596347	0.01195
A0A1S3DH01	Trimeric intracellular cation channel type 1B.1	LOC103518294		tr|A0A1S3DH01|A0A1S3DH01_DIACI	tr|A0A1S3DH01|A0A1S3DH01_DIACI Trimeric intracellular cation channel type 1B.1 OS=Diaphorina citri OX=121845 GN=LOC103518294 PE=3 SV=1	1	6	6	6	33.5	30.487	322180	305050	283830	303687	130470	197170	240860	189500	1.60257	0.0282402
A0A1S3DH60	Haloacid dehalogenase-like hydrolase domain-containing 5	LOC103517622		tr|A0A1S3DH60|A0A1S3DH60_DIACI	tr|A0A1S3DH60|A0A1S3DH60_DIACI Haloacid dehalogenase-like hydrolase domain-containing 5 OS=Diaphorina citri OX=121845 GN=LOC103517622 PE=4 SV=1	1	5	5	5	27.1	35.128	300490	233990	281390	271957	148020	217300	117170	160830	1.69096	0.0354711
A0A1S3DHG4	Serpin-Z1C isoform X11	LOC103518206		tr|A0A1S3DHG4|A0A1S3DHG4_DIACI	tr|A0A1S3DHG4|A0A1S3DHG4_DIACI Serpin-Z1C isoform X11 OS=Diaphorina citri OX=121845 GN=LOC103518206 PE=3 SV=1	1	25	25	2	72.3	41.132	20847000	17830000	15522000	1.80663e+07	12688000	10564000	11253000	1.15017e+07	1.57076	0.0168815
A0A1S3DI48	Translation elongation factor 2	LOC103518196		tr|A0A1S3DI48|A0A1S3DI48_DIACI	tr|A0A1S3DI48|A0A1S3DI48_DIACI Translation elongation factor 2 OS=Diaphorina citri OX=121845 GN=LOC103518196 PE=4 SV=1	1	44	44	44	66.4	94	25709000	19949000	23775000	2.31443e+07	16728000	16790000	15245000	1.62543e+07	1.42389	0.0175242
A0A1S3DI91	Cadherin-3	LOC103519204		tr|A0A1S3DI91|A0A1S3DI91_DIACI	tr|A0A1S3DI91|A0A1S3DI91_DIACI Cadherin-3 OS=Diaphorina citri OX=121845 GN=LOC103519204 PE=4 SV=1	1	4	4	4	9.9	85.987	109290	58689	76858	81612.3	137820	181490	140980	153430	0.531919	0.0244896
A0A1S3DIA9	Mitochondrial pyruvate carrier	LOC103518288	FUNCTION: Mediates the uptake of pyruvate into mitochondria. {ECO:0000256|RuleBase:RU363100}.	tr|A0A1S3DIA9|A0A1S3DIA9_DIACI	tr|A0A1S3DIA9|A0A1S3DIA9_DIACI Mitochondrial pyruvate carrier OS=Diaphorina citri OX=121845 GN=LOC103518288 PE=3 SV=1	1	7	7	7	53.6	13.917	1208800	1117800	1144000	1.15687e+06	613810	630400	868940	704383	1.64238	0.00644314
A0A1S4ENB8	Uncharacterized protein LOC103519365	LOC103519365		tr|A0A1S4ENB8|A0A1S4ENB8_DIACI;tr|A0A1S3DIM3|A0A1S3DIM3_DIACI	tr|A0A1S4ENB8|A0A1S4ENB8_DIACI Uncharacterized protein LOC103519365 OS=Diaphorina citri OX=121845 GN=LOC103519365 PE=4 SV=2;tr|A0A1S3DIM3|A0A1S3DIM3_DIACI Uncharacterized protein LOC103519361 OS=Diaphorina citri OX=121845 GN=LOC103519361 PE=4 SV=1	2	6	6	6	46.9	27.833	630350	782740	683700	698930	318270	515110	500720	444700	1.57169	0.0304924
A0A1S3DIR9	Cuticle protein 7-like	LOC103519424		tr|A0A1S3DIR9|A0A1S3DIR9_DIACI	tr|A0A1S3DIR9|A0A1S3DIR9_DIACI Cuticle protein 7-like OS=Diaphorina citri OX=121845 GN=LOC103519424 PE=4 SV=1	1	6	6	6	62.4	20.126	2129300	2624300	2164900	2.30617e+06	4573100	3839000	3129000	3.84703e+06	0.599466	0.0259995
A0A1S3DIS9	Malate dehydrogenase, cytoplasmic	LOC103519440		tr|A0A1S3DIS9|A0A1S3DIS9_DIACI	tr|A0A1S3DIS9|A0A1S3DIS9_DIACI Malate dehydrogenase, cytoplasmic OS=Diaphorina citri OX=121845 GN=LOC103519440 PE=3 SV=1	1	15	15	15	51.1	36.604	630160	402040	643530	558577	1024700	780250	918970	907973	0.615191	0.0296884
A0A1S3DIZ1	Titin-like	LOC103519537		tr|A0A1S3DIZ1|A0A1S3DIZ1_DIACI	tr|A0A1S3DIZ1|A0A1S3DIZ1_DIACI Titin-like OS=Diaphorina citri OX=121845 GN=LOC103519537 PE=4 SV=1	1	8	8	8	18	79.14	245490	232770	249390	242550	180050	196330	153970	176783	1.37202	0.00782766
A0A1S3DJ13	Histone H2B	LOC103519436		tr|A0A1S3DJ13|A0A1S3DJ13_DIACI	tr|A0A1S3DJ13|A0A1S3DJ13_DIACI Histone H2B OS=Diaphorina citri OX=121845 GN=LOC103519436 PE=3 SV=2	1	3	2	2	34.3	7.4554	380550	268920	276440	308637	155210	159850	210200	175087	1.76277	0.0290833
A0A1S3DJ44	Carbonic anhydrase 1	LOC103519635		tr|A0A1S3DJ44|A0A1S3DJ44_DIACI	tr|A0A1S3DJ44|A0A1S3DJ44_DIACI Carbonic anhydrase 1 OS=Diaphorina citri OX=121845 GN=LOC103519635 PE=3 SV=1	1	2	2	2	15.3	42.285	49458	59737	72727	60640.7	100320	100400	110050	103590	0.585391	0.00453031
A0A1S3DJZ2	Protein lingerer-like	LOC103519259		tr|A0A1S3DJZ2|A0A1S3DJZ2_DIACI	tr|A0A1S3DJZ2|A0A1S3DJZ2_DIACI Protein lingerer-like OS=Diaphorina citri OX=121845 GN=LOC103519259 PE=4 SV=1	1	1	1	1	3.9	31.983	369050	517110	360620	415593	1087500	678670	687880	818017	0.50805	0.0491102
A0A1S3DKU5	Lysine--tRNA ligase	LOC103520308		tr|A0A1S3DKU5|A0A1S3DKU5_DIACI	tr|A0A1S3DKU5|A0A1S3DKU5_DIACI Lysine--tRNA ligase OS=Diaphorina citri OX=121845 GN=LOC103520308 PE=4 SV=2	1	6	6	6	27.7	39.532	484570	420090	511700	472120	337700	406050	360280	368010	1.2829	0.0369216
A0A1S3DLK3	Uncharacterized protein LOC103521004	LOC103521004		tr|A0A1S3DLK3|A0A1S3DLK3_DIACI	tr|A0A1S3DLK3|A0A1S3DLK3_DIACI Uncharacterized protein LOC103521004 OS=Diaphorina citri OX=121845 GN=LOC103521004 PE=4 SV=1	1	3	3	3	29.6	13.725	5854900	5582100	4600500	5.34583e+06	9419600	8070200	6778800	8.08953e+06	0.660833	0.0323
A0A1S3DLW1	Uncharacterized protein LOC103520858	LOC103520858		tr|A0A1S3DLW1|A0A1S3DLW1_DIACI;tr|A0A1S4ERG0|A0A1S4ERG0_DIACI;tr|A0A1S4ERD2|A0A1S4ERD2_DIACI;tr|A0A3Q0JPS1|A0A3Q0JPS1_DIACI	tr|A0A1S3DLW1|A0A1S3DLW1_DIACI Uncharacterized protein LOC103520858 OS=Diaphorina citri OX=121845 GN=LOC103520858 PE=3 SV=1;tr|A0A1S4ERG0|A0A1S4ERG0_DIACI Uncharacterized protein LOC103523577 OS=Diaphorina citri OX=121845 GN=LOC103523577 PE=3 SV=1	4	99	99	46	42	442.56	8591700	6084800	7819100	7.49853e+06	10723000	12089000	12162000	11658000	0.643209	0.00900348
A0A1S3DMD0	N-alpha-acetyltransferase 15, NatA auxiliary subunit-like	LOC103521179		tr|A0A1S3DMD0|A0A1S3DMD0_DIACI;tr|A0A3Q0JDQ6|A0A3Q0JDQ6_DIACI	tr|A0A1S3DMD0|A0A1S3DMD0_DIACI N-alpha-acetyltransferase 15, NatA auxiliary subunit-like OS=Diaphorina citri OX=121845 GN=LOC103521179 PE=4 SV=2;tr|A0A3Q0JDQ6|A0A3Q0JDQ6_DIACI N-alpha-acetyltransferase 15, NatA auxiliary subunit-like OS=Diaphorina citri OX	2	2	2	2	13.2	21.604	135990	128560	126550	130367	97322	120800	100970	106364	1.22567	0.0375874
A0A1S3DME9	Uncharacterized protein LOC103521203	LOC103521203		tr|A0A1S3DME9|A0A1S3DME9_DIACI	tr|A0A1S3DME9|A0A1S3DME9_DIACI Uncharacterized protein LOC103521203 OS=Diaphorina citri OX=121845 GN=LOC103521203 PE=4 SV=1	1	2	2	2	10.9	30.121	35996	41595	20212	32601	59808	53437	77357	63534	0.513127	0.0322004
A0A1S3DNU0	Thioredoxin reductase 1, mitochondrial-like	LOC103522158		tr|A0A1S3DNU0|A0A1S3DNU0_DIACI	tr|A0A1S3DNU0|A0A1S3DNU0_DIACI Thioredoxin reductase 1, mitochondrial-like OS=Diaphorina citri OX=121845 GN=LOC103522158 PE=3 SV=1	1	5	5	5	61.8	11.248	1676300	1299000	1532300	1.50253e+06	1103000	984620	1037200	1.04161e+06	1.44252	0.0160872
A0A1S3DPG8	Cubilin-like	LOC103522204		tr|A0A1S3DPG8|A0A1S3DPG8_DIACI	tr|A0A1S3DPG8|A0A1S3DPG8_DIACI Cubilin-like OS=Diaphorina citri OX=121845 GN=LOC103522204 PE=4 SV=1	1	2	2	2	20.6	19.876	73415	85330	65665	74803.3	33402	51053	59194	47883	1.56221	0.0474715
A0A1S3DPI1	Sidoreflexin	LOC103522479		tr|A0A1S3DPI1|A0A1S3DPI1_DIACI	tr|A0A1S3DPI1|A0A1S3DPI1_DIACI Sidoreflexin OS=Diaphorina citri OX=121845 GN=LOC103522479 PE=3 SV=1	1	13	13	2	65	36.863	3587900	2896000	2779300	3.08773e+06	1582600	2001200	2349400	1.97773e+06	1.56125	0.0297994
A0A1S3DPZ6	Eukaryotic translation initiation factor 3 subunit L-like	LOC103522668		tr|A0A1S3DPZ6|A0A1S3DPZ6_DIACI	tr|A0A1S3DPZ6|A0A1S3DPZ6_DIACI Eukaryotic translation initiation factor 3 subunit L-like OS=Diaphorina citri OX=121845 GN=LOC103522668 PE=4 SV=1	1	3	2	2	20	15.036	247240	180920	210020	212727	132100	147010	139360	139490	1.52503	0.0204147
A0A1S3DQ38	U5 small nuclear ribonucleoprotein 200 kDa helicase	LOC103522739		tr|A0A1S3DQ38|A0A1S3DQ38_DIACI	tr|A0A1S3DQ38|A0A1S3DQ38_DIACI U5 small nuclear ribonucleoprotein 200 kDa helicase OS=Diaphorina citri OX=121845 GN=LOC103522739 PE=4 SV=2	1	2	2	2	6.8	59.776	24527	21441	25319	23762.3	13184	18922	18188	16764.7	1.41741	0.0315177
A0A1S3DQW5	Cytochrome b-c1 complex subunit 8	LOC103523138		tr|A0A1S3DQW5|A0A1S3DQW5_DIACI	tr|A0A1S3DQW5|A0A1S3DQW5_DIACI Cytochrome b-c1 complex subunit 8 OS=Diaphorina citri OX=121845 GN=LOC103523138 PE=3 SV=1	1	6	6	6	83.3	9.8151	6873900	5987000	5728500	6.19647e+06	4779900	4571600	3415200	4.25557e+06	1.45608	0.0239956
A0A1S3DR35	Asparagine synthetase [glutamine-hydrolyzing]	LOC103522904		tr|A0A1S3DR35|A0A1S3DR35_DIACI	tr|A0A1S3DR35|A0A1S3DR35_DIACI Asparagine synthetase [glutamine-hydrolyzing] OS=Diaphorina citri OX=121845 GN=LOC103522904 PE=4 SV=1	1	6	6	6	19.1	51.25	194640	216220	257090	222650	122180	138850	158670	139900	1.59149	0.0173087
A0A1S3DRL7	V-type proton ATPase subunit E-like	LOC103523463		tr|A0A1S3DRL7|A0A1S3DRL7_DIACI	tr|A0A1S3DRL7|A0A1S3DRL7_DIACI V-type proton ATPase subunit E-like OS=Diaphorina citri OX=121845 GN=LOC103523463 PE=3 SV=1	1	11	11	11	55.3	26.106	8601000	6877100	7110600	7.52957e+06	5868500	5656300	5082700	5.53583e+06	1.36015	0.0276213
A0A1S3DS04	Apyrase-like	LOC103522838		tr|A0A1S3DS04|A0A1S3DS04_DIACI	tr|A0A1S3DS04|A0A1S3DS04_DIACI Apyrase-like OS=Diaphorina citri OX=121845 GN=LOC103522838 PE=3 SV=1	1	20	20	20	67	40.145	15023000	16163000	16262000	15816000	12976000	12610000	13312000	12966000	1.21981	0.00308435
A0A1S3DTB4	Dolichol-phosphate mannosyltransferase subunit 1	LOC103523480	FUNCTION: Transfers mannose from GDP-mannose to dolichol monophosphate to form dolichol phosphate mannose (Dol-P-Man) which is the mannosyl donor in pathways leading to N-glycosylation, glycosyl phosphatidylinositol membrane anchoring, and O-mannosylation of proteins. {ECO:0000256|RuleBase:RU365083}.	tr|A0A1S3DTB4|A0A1S3DTB4_DIACI	tr|A0A1S3DTB4|A0A1S3DTB4_DIACI Dolichol-phosphate mannosyltransferase subunit 1 OS=Diaphorina citri OX=121845 GN=LOC103523480 PE=3 SV=1	1	7	7	7	41.6	27.431	446950	354660	380230	393947	271520	256060	251530	259703	1.51691	0.00886741
A0A1S3DTE6	NADH dehydrogenase [ubiquinone] 1 alpha subcomplex subunit 12	LOC103524313	FUNCTION: Accessory subunit of the mitochondrial membrane respiratory chain NADH dehydrogenase (Complex I), that is believed not to be involved in catalysis. Complex I functions in the transfer of electrons from NADH to the respiratory chain. The immediate electron acceptor for the enzyme is believed to be ubiquinone. {ECO:0000256|RuleBase:RU363103}.	tr|A0A1S3DTE6|A0A1S3DTE6_DIACI	tr|A0A1S3DTE6|A0A1S3DTE6_DIACI NADH dehydrogenase [ubiquinone] 1 alpha subcomplex subunit 12 OS=Diaphorina citri OX=121845 GN=LOC103524313 PE=3 SV=1	1	5	5	5	41.7	15.304	1774500	2116300	1833400	1.90807e+06	1251100	1406800	1478900	1.37893e+06	1.38373	0.0133704
A0A1S3DU63	Probable methylthioribulose-1-phosphate dehydratase	LOC103524408	FUNCTION: Catalyzes the dehydration of methylthioribulose-1-phosphate (MTRu-1-P) into 2,3-diketo-5-methylthiopentyl-1-phosphate (DK-MTP-1-P). {ECO:0000256|HAMAP-Rule:MF_03116, ECO:0000256|SAAS:SAAS00035250}.	tr|A0A1S3DU63|A0A1S3DU63_DIACI	tr|A0A1S3DU63|A0A1S3DU63_DIACI Probable methylthioribulose-1-phosphate dehydratase OS=Diaphorina citri OX=121845 GN=LOC103524408 PE=3 SV=1	1	12	12	12	59.5	25.7	1578700	1263700	1293100	1378500	1728900	1631800	1680400	1.68037e+06	0.820357	0.0443703
A0A1S3DU64	Uncharacterized protein LOC103523903	LOC103523903		tr|A0A1S3DU64|A0A1S3DU64_DIACI	tr|A0A1S3DU64|A0A1S3DU64_DIACI Uncharacterized protein LOC103523903 OS=Diaphorina citri OX=121845 GN=LOC103523903 PE=3 SV=1	1	22	22	22	60.6	60.802	1199000	1024000	1218100	1.14703e+06	1837200	2233100	2214000	2.09477e+06	0.547571	0.00268416
A0A1S4ESV1	Aldose reductase isoform X2	LOC103524884		tr|A0A1S4ESV1|A0A1S4ESV1_DIACI;tr|A0A1S3DUD6|A0A1S3DUD6_DIACI	tr|A0A1S4ESV1|A0A1S4ESV1_DIACI Aldose reductase isoform X2 OS=Diaphorina citri OX=121845 GN=LOC103524884 PE=4 SV=1;tr|A0A1S3DUD6|A0A1S3DUD6_DIACI Aldose reductase isoform X1 OS=Diaphorina citri OX=121845 GN=LOC103524884 PE=4 SV=1	2	17	17	17	71.4	37.036	4705800	3742700	4539700	4329400	3392900	2908800	2759600	3.02043e+06	1.43337	0.0207639
A0A1S3DUM4	Uncharacterized protein LOC103524647 isoform X1	LOC103524647		tr|A0A1S3DUM4|A0A1S3DUM4_DIACI;tr|A0A1S3DUT4|A0A1S3DUT4_DIACI	tr|A0A1S3DUM4|A0A1S3DUM4_DIACI Uncharacterized protein LOC103524647 isoform X1 OS=Diaphorina citri OX=121845 GN=LOC103524647 PE=4 SV=1;tr|A0A1S3DUT4|A0A1S3DUT4_DIACI Uncharacterized protein LOC103524647 isoform X2 OS=Diaphorina citri OX=121845 GN=LOC103524	2	18	18	3	71.4	28.647	38698000	33705000	31953000	3.47853e+07	25288000	25245000	29123000	26552000	1.31008	0.0263464
A0A1S3DUT7	Carboxypeptidase Q	LOC103524745		tr|A0A1S3DUT7|A0A1S3DUT7_DIACI	tr|A0A1S3DUT7|A0A1S3DUT7_DIACI Carboxypeptidase Q OS=Diaphorina citri OX=121845 GN=LOC103524745 PE=4 SV=1	1	12	12	12	39.9	52.585	4864300	3033900	4225300	4.04117e+06	2671900	2214100	1754700	2.21357e+06	1.82564	0.0378264
A0A1S4E6U9	ADP-ribosylation factor	LOC103505457		tr|A0A1S4E6U9|A0A1S4E6U9_DIACI;tr|A0A1S4E6U2|A0A1S4E6U2_DIACI	tr|A0A1S4E6U9|A0A1S4E6U9_DIACI ADP-ribosylation factor OS=Diaphorina citri OX=121845 GN=LOC103505457 PE=3 SV=1	2	7	7	7	54.4	20.762	2420300	2027900	2236500	2.22823e+06	1472400	1664700	1791200	1.64277e+06	1.35639	0.016149
A0A1S4E7U6	26S proteasome non-ATPase regulatory subunit 12	LOC103505862		tr|A0A1S4E7U6|A0A1S4E7U6_DIACI	tr|A0A1S4E7U6|A0A1S4E7U6_DIACI 26S proteasome non-ATPase regulatory subunit 12 OS=Diaphorina citri OX=121845 GN=LOC103505862 PE=3 SV=1	1	11	11	11	35	52.149	785240	678370	629780	697797	394410	556860	542860	498043	1.40108	0.0449994
A0A1S4E7Y5	ethanolamine-phosphate cytidylyltransferase	LOC103506224		tr|A0A1S4E7Y5|A0A1S4E7Y5_DIACI;tr|A0A3Q0JD99|A0A3Q0JD99_DIACI	tr|A0A1S4E7Y5|A0A1S4E7Y5_DIACI ethanolamine-phosphate cytidylyltransferase OS=Diaphorina citri OX=121845 GN=LOC103506224 PE=3 SV=1	2	6	6	3	46.5	27.451	409030	361190	328870	366363	245900	282610	248310	258940	1.41486	0.0147164
A0A1S4E856	28S ribosomal protein S5, mitochondrial	LOC103506430		tr|A0A1S4E856|A0A1S4E856_DIACI	tr|A0A1S4E856|A0A1S4E856_DIACI 28S ribosomal protein S5, mitochondrial OS=Diaphorina citri OX=121845 GN=LOC103506430 PE=3 SV=1	1	3	3	3	8	50.402	65809	50243	69321	61791	46932	39726	39539	42065.7	1.46892	0.0359554
A0A1S4E8P0	NADH dehydrogenase [ubiquinone] 1 alpha subcomplex subunit 6	LOC103506742		tr|A0A1S4E8P0|A0A1S4E8P0_DIACI	tr|A0A1S4E8P0|A0A1S4E8P0_DIACI NADH dehydrogenase [ubiquinone] 1 alpha subcomplex subunit 6 OS=Diaphorina citri OX=121845 GN=LOC103506742 PE=3 SV=1	1	3	3	3	16.8	14.373	1522500	1056000	1184200	1.25423e+06	669500	614660	652150	645437	1.94323	0.0121956
A0A1S4E932	Large ribosomal subunit protein uL13	LOC103507206		tr|A0A1S4E932|A0A1S4E932_DIACI;tr|Q0PWU2|Q0PWU2_DIACI;tr|A0A3Q0IU91|A0A3Q0IU91_DIACI	tr|A0A1S4E932|A0A1S4E932_DIACI Large ribosomal subunit protein uL13 OS=Diaphorina citri OX=121845 GN=LOC103507206 PE=3 SV=1;tr|Q0PWU2|Q0PWU2_DIACI Large ribosomal subunit protein uL13 (Fragment) OS=Diaphorina citri OX=121845 PE=2 SV=1	3	3	3	3	14.6	21.368	1200100	1380900	1552700	1377900	942120	1040600	1057000	1013240	1.35989	0.0278228
A0A1S4E9C4	Succinate dehydrogenase [ubiquinone] iron-sulfur subunit, mitochondrial	LOC103507414	FUNCTION: Iron-sulfur protein (IP) subunit of succinate dehydrogenase (SDH) that is involved in complex II of the mitochondrial electron transport chain and is responsible for transferring electrons from succinate to ubiquinone (coenzyme Q). {ECO:0000256|RuleBase:RU361237}.	tr|A0A1S4E9C4|A0A1S4E9C4_DIACI	tr|A0A1S4E9C4|A0A1S4E9C4_DIACI Succinate dehydrogenase [ubiquinone] iron-sulfur subunit, mitochondrial OS=Diaphorina citri OX=121845 GN=LOC103507414 PE=3 SV=1	1	15	15	15	68.4	24.341	10751000	8466800	7730800	8.98287e+06	4729200	4694300	4940500	4788000	1.87612	0.0100522
A0A1S4EA04	Guanine nucleotide-binding protein subunit gamma	LOC103507998	FUNCTION: Guanine nucleotide-binding proteins (G proteins) are involved as a modulator or transducer in various transmembrane signaling systems. The beta and gamma chains are required for the GTPase activity, for replacement of GDP by GTP, and for G protein-effector interaction. {ECO:0000256|RuleBase:RU004973}.	tr|A0A1S4EA04|A0A1S4EA04_DIACI	tr|A0A1S4EA04|A0A1S4EA04_DIACI Guanine nucleotide-binding protein subunit gamma OS=Diaphorina citri OX=121845 GN=LOC103507998 PE=3 SV=1	1	2	2	2	48.6	8.3656	391090	370160	390400	383883	239480	341360	304710	295183	1.30049	0.044067
A0A1S4EAF3	Glyoxalase domain-containing protein 4	LOC103508248		tr|A0A1S4EAF3|A0A1S4EAF3_DIACI;tr|A0A1S4EAL7|A0A1S4EAL7_DIACI	tr|A0A1S4EAF3|A0A1S4EAF3_DIACI Glyoxalase domain-containing protein 4 OS=Diaphorina citri OX=121845 GN=LOC103508248 PE=3 SV=2	2	11	11	11	73.1	27.198	1942900	2390600	2210600	2.18137e+06	3243700	2777800	2694400	2905300	0.750823	0.0280233
A0A1S4EB00	Fatty acid synthase-like	LOC108252307		tr|A0A1S4EB00|A0A1S4EB00_DIACI	tr|A0A1S4EB00|A0A1S4EB00_DIACI Fatty acid synthase-like OS=Diaphorina citri OX=121845 GN=LOC108252307 PE=3 SV=2	1	6	6	6	17.6	49.099	241570	182620	246950	223713	176260	158790	148190	161080	1.38883	0.0475847
A0A1S4EB33	tRNA (uracil(54)-C(5))-methyltransferase	LOC103508800		tr|A0A1S4EB33|A0A1S4EB33_DIACI	tr|A0A1S4EB33|A0A1S4EB33_DIACI tRNA (uracil(54)-C(5))-methyltransferase OS=Diaphorina citri OX=121845 GN=LOC103508800 PE=3 SV=1	1	5	5	5	7.3	78.563	393410	251420	293670	312833	160520	173100	165030	166217	1.88208	0.0255872
A0A1S4EB56	Uncharacterized protein LOC103508661 isoform X1	LOC103508661		tr|A0A1S4EB56|A0A1S4EB56_DIACI	tr|A0A1S4EB56|A0A1S4EB56_DIACI Uncharacterized protein LOC103508661 isoform X1 OS=Diaphorina citri OX=121845 GN=LOC103508661 PE=4 SV=1	1	5	5	4	48.6	16.035	1419700	1840800	1550800	1.60377e+06	2231700	2655200	2296200	2.39437e+06	0.669808	0.0120327
A0A1S4EB99	NADH-ubiquinone oxidoreductase subunit 8	LOC103508771		tr|A0A1S4EB99|A0A1S4EB99_DIACI	tr|A0A1S4EB99|A0A1S4EB99_DIACI NADH-ubiquinone oxidoreductase subunit 8 OS=Diaphorina citri OX=121845 GN=LOC103508771 PE=3 SV=2	1	8	8	8	47.8	28.544	4201900	4221000	4301100	4.24133e+06	3663300	3546000	3510500	3.57327e+06	1.18696	0.000268729
A0A1S4EBG9	Aspartate--tRNA ligase, cytoplasmic	LOC108252361		tr|A0A1S4EBG9|A0A1S4EBG9_DIACI	tr|A0A1S4EBG9|A0A1S4EBG9_DIACI Aspartate--tRNA ligase, cytoplasmic OS=Diaphorina citri OX=121845 GN=LOC108252361 PE=3 SV=1	1	8	8	8	37.2	36.294	861350	591880	619990	691073	411900	491110	427980	443663	1.55765	0.0496251
A0A1S4EBN0	Regulator of microtubule dynamics protein 2-like	LOC103509011		tr|A0A1S4EBN0|A0A1S4EBN0_DIACI	tr|A0A1S4EBN0|A0A1S4EBN0_DIACI Regulator of microtubule dynamics protein 2-like OS=Diaphorina citri OX=121845 GN=LOC103509011 PE=4 SV=1	1	13	13	13	52.8	30.855	2762300	3349900	3175700	3.09597e+06	5365100	4422900	5295100	5027700	0.615782	0.0052394
A0A1S4EDB0	Uncharacterized protein LOC103510432 isoform X1	LOC103510432		tr|A0A1S4EDB0|A0A1S4EDB0_DIACI;tr|A0A1S3DSL3|A0A1S3DSL3_DIACI	tr|A0A1S4EDB0|A0A1S4EDB0_DIACI Uncharacterized protein LOC103510432 isoform X1 OS=Diaphorina citri OX=121845 GN=LOC103510432 PE=4 SV=1;tr|A0A1S3DSL3|A0A1S3DSL3_DIACI Uncharacterized protein LOC103523947 OS=Diaphorina citri OX=121845 GN=LOC103523947 PE=4 SV	2	8	8	8	34.7	30.734	465940	408670	458890	444500	562330	606990	769570	646297	0.687765	0.0369022
A0A1S4EDN7	NADH dehydrogenase [ubiquinone] iron-sulfur protein 7, mitochondrial-like	LOC103511148		tr|A0A1S4EDN7|A0A1S4EDN7_DIACI	tr|A0A1S4EDN7|A0A1S4EDN7_DIACI NADH dehydrogenase [ubiquinone] iron-sulfur protein 7, mitochondrial-like OS=Diaphorina citri OX=121845 GN=LOC103511148 PE=4 SV=1	1	7	7	7	54.8	16.188	2693800	2660900	2502600	2619100	1502000	1725500	1949300	1725600	1.51779	0.003257
A0A1S4EE60	LOW QUALITY PROTEIN: ryanodine receptor-like	LOC103511157		tr|A0A1S4EE60|A0A1S4EE60_DIACI;tr|A0A1S4ER78|A0A1S4ER78_DIACI	tr|A0A1S4EE60|A0A1S4EE60_DIACI LOW QUALITY PROTEIN: ryanodine receptor-like OS=Diaphorina citri OX=121845 GN=LOC103511157 PE=4 SV=1	2	36	36	30	17.6	355.49	1506800	1119200	1148100	1.25803e+06	697230	772490	994720	821480	1.53142	0.0465462
A0A1S4EES3	Peptidyl-prolyl cis-trans isomerase	LOC108252712	FUNCTION: PPIases accelerate the folding of proteins. It catalyzes the cis-trans isomerization of proline imidic peptide bonds in oligopeptides. {ECO:0000256|RuleBase:RU363019}.	tr|A0A1S4EES3|A0A1S4EES3_DIACI;tr|A0A3Q0JI03|A0A3Q0JI03_DIACI;tr|A0A1S3DMU8|A0A1S3DMU8_DIACI	tr|A0A1S4EES3|A0A1S4EES3_DIACI Peptidyl-prolyl cis-trans isomerase OS=Diaphorina citri OX=121845 GN=LOC108252712 PE=3 SV=2;tr|A0A3Q0JI03|A0A3Q0JI03_DIACI Peptidyl-prolyl cis-trans isomerase OS=Diaphorina citri OX=121845 GN=LOC113472470 PE=3 SV=1;tr|A0A1S3D	3	8	8	8	64.4	16.13	5759400	6654300	6280300	6.23133e+06	8216300	7908600	6863200	7662700	0.813203	0.0418645
A0A1S4EES7	fumarate hydratase	LOC103512153		tr|A0A1S4EES7|A0A1S4EES7_DIACI	tr|A0A1S4EES7|A0A1S4EES7_DIACI fumarate hydratase OS=Diaphorina citri OX=121845 GN=LOC103512153 PE=3 SV=2	1	12	12	12	53.7	33.839	15314000	13275000	11735000	1.34413e+07	9684200	8652300	10359000	9.56517e+06	1.40524	0.0279669
A0A1S4EF16	Adenosylhomocysteinase	LOC103512015		tr|A0A1S4EF16|A0A1S4EF16_DIACI	tr|A0A1S4EF16|A0A1S4EF16_DIACI Adenosylhomocysteinase OS=Diaphorina citri OX=121845 GN=LOC103512015 PE=3 SV=1	1	19	19	19	62.3	47.783	5225400	3679700	4470400	4458500	2602000	2905500	2850100	2.78587e+06	1.6004	0.0214121
A0A1S4EF58	Calcium uptake protein 3, mitochondrial	LOC103512249		tr|A0A1S4EF58|A0A1S4EF58_DIACI	tr|A0A1S4EF58|A0A1S4EF58_DIACI Calcium uptake protein 3, mitochondrial OS=Diaphorina citri OX=121845 GN=LOC103512249 PE=4 SV=1	1	1	1	1	4.7	34.696		19875	16561	18218	8871.2	13703	10948	11174.1	1.63038	0.0486315
A0A1S4EFE4	microsomal epoxide hydrolase	LOC103512380		tr|A0A1S4EFE4|A0A1S4EFE4_DIACI;tr|A0A3Q0J4M9|A0A3Q0J4M9_DIACI	tr|A0A1S4EFE4|A0A1S4EFE4_DIACI microsomal epoxide hydrolase OS=Diaphorina citri OX=121845 GN=LOC103512380 PE=3 SV=2	2	22	22	22	69.8	55.055	10286000	11236000	10431000	10651000	5515900	9348300	7433100	7.43243e+06	1.43304	0.0482808
A0A1S4EG08	Uncharacterized protein LOC103512796	LOC103512796		tr|A0A1S4EG08|A0A1S4EG08_DIACI	tr|A0A1S4EG08|A0A1S4EG08_DIACI Uncharacterized protein LOC103512796 OS=Diaphorina citri OX=121845 GN=LOC103512796 PE=4 SV=2	1	3	2	2	7.3	87.547	737900	672540	647150	685863	1463900	1198000	1010800	1.22423e+06	0.560239	0.0159761
A0A1S4EGC2	Phosphate carrier protein, mitochondrial-like	LOC103513298		tr|A0A1S4EGC2|A0A1S4EGC2_DIACI;tr|A0A3Q0IL85|A0A3Q0IL85_DIACI	tr|A0A1S4EGC2|A0A1S4EGC2_DIACI Phosphate carrier protein, mitochondrial-like OS=Diaphorina citri OX=121845 GN=LOC103513298 PE=3 SV=1	2	18	18	12	64.1	37.02	33502000	27180000	26310000	2.89973e+07	16997000	18348000	20276000	1.85403e+07	1.56401	0.0131117
A0A1S4EGJ4	Proteasome subunit beta	LOC108252904		tr|A0A1S4EGJ4|A0A1S4EGJ4_DIACI	tr|A0A1S4EGJ4|A0A1S4EGJ4_DIACI Proteasome subunit beta OS=Diaphorina citri OX=121845 GN=LOC108252904 PE=3 SV=1	1	4	4	4	28.8	24.587	714180	661460	723680	699773	515990	580000	528360	541450	1.29241	0.00454225
A0A1S4EHE0	Carboxypeptidase	LOC108253002		tr|A0A1S4EHE0|A0A1S4EHE0_DIACI;tr|A0A3Q0JKU3|A0A3Q0JKU3_DIACI	tr|A0A1S4EHE0|A0A1S4EHE0_DIACI Carboxypeptidase OS=Diaphorina citri OX=121845 GN=LOC108253002 PE=3 SV=1	2	13	13	13	34.3	59.559	1723800	1161500	1351000	1412100	911000	870650	898300	893317	1.58074	0.0350926
A0A1S4EHS4	Leucine-rich melanocyte differentiation-associated protein	LOC103514446		tr|A0A1S4EHS4|A0A1S4EHS4_DIACI	tr|A0A1S4EHS4|A0A1S4EHS4_DIACI Leucine-rich melanocyte differentiation-associated protein OS=Diaphorina citri OX=121845 GN=LOC103514446 PE=4 SV=1	1	1	1	1	13.3	14.107		35079	33307	34193	26648		22615	24631.5	1.38818	0.0491825
A0A1S4EHT5	Acyl-CoA Delta(11) desaturase isoform X1	LOC103514600		tr|A0A1S4EHT5|A0A1S4EHT5_DIACI	tr|A0A1S4EHT5|A0A1S4EHT5_DIACI Acyl-CoA Delta(11) desaturase isoform X1 OS=Diaphorina citri OX=121845 GN=LOC103514600 PE=3 SV=1	1	10	10	10	35.9	42.622	1293800	1209600	1169500	1224300	625110	971220	930160	842163	1.45376	0.029419
A0A1S4EHZ4	Glycerol-3-phosphate dehydrogenase [NAD(+)]	LOC103514396		tr|A0A1S4EHZ4|A0A1S4EHZ4_DIACI;tr|A0A1S3DA57|A0A1S3DA57_DIACI	tr|A0A1S4EHZ4|A0A1S4EHZ4_DIACI Glycerol-3-phosphate dehydrogenase [NAD(+)] OS=Diaphorina citri OX=121845 GN=LOC103514396 PE=3 SV=1;tr|A0A1S3DA57|A0A1S3DA57_DIACI Glycerol-3-phosphate dehydrogenase [NAD(+)] OS=Diaphorina citri OX=121845 GN=LOC103514393 PE=3	2	21	21	21	76.9	34.623	37103000	30750000	30524000	3.27923e+07	16608000	19598000	21456000	1.92207e+07	1.7061	0.00623209
A0A1S4EI60	Cytochrome c1, heme protein, mitochondrial	LOC103514702		tr|A0A1S4EI60|A0A1S4EI60_DIACI	tr|A0A1S4EI60|A0A1S4EI60_DIACI Cytochrome c1, heme protein, mitochondrial OS=Diaphorina citri OX=121845 GN=LOC103514702 PE=3 SV=2	1	12	12	12	57.4	32.095	14271000	14094000	12988000	1.37843e+07	8423000	10541000	10292000	9752000	1.41349	0.00664331
A0A1S4EID0	Large ribosomal subunit protein eL28	LOC103514921		tr|A0A1S4EID0|A0A1S4EID0_DIACI;tr|Q0PXV0|Q0PXV0_DIACI	tr|A0A1S4EID0|A0A1S4EID0_DIACI Large ribosomal subunit protein eL28 OS=Diaphorina citri OX=121845 GN=LOC103514921 PE=3 SV=1;tr|Q0PXV0|Q0PXV0_DIACI Large ribosomal subunit protein eL28 OS=Diaphorina citri OX=121845 GN=LOC103514918 PE=2 SV=1	2	3	3	3	40.8	8.5929	1417200	845610	1021800	1094870	516890	586800	607170	570287	1.91986	0.0375042
A0A1S4EIR4	Large ribosomal subunit protein uL11	LOC103515306		tr|A0A1S4EIR4|A0A1S4EIR4_DIACI	tr|A0A1S4EIR4|A0A1S4EIR4_DIACI Large ribosomal subunit protein uL11 OS=Diaphorina citri OX=121845 GN=LOC103515306 PE=3 SV=1	1	5	5	5	43	17.772	2633000	2805800	3073700	2837500	1960300	2166300	1872400	1.99967e+06	1.41899	0.00567037
A0A1S4EJ46	SUMO-activating enzyme subunit 1-like	LOC103515582		tr|A0A1S4EJ46|A0A1S4EJ46_DIACI;tr|A0A1S3DTQ2|A0A1S3DTQ2_DIACI	tr|A0A1S4EJ46|A0A1S4EJ46_DIACI SUMO-activating enzyme subunit 1-like OS=Diaphorina citri OX=121845 GN=LOC103515582 PE=3 SV=1;tr|A0A1S3DTQ2|A0A1S3DTQ2_DIACI SUMO-activating enzyme subunit 1-like OS=Diaphorina citri OX=121845 GN=LOC103523667 PE=4 SV=1	2	4	4	3	22	31.158	451780	376530	435510	421273	319030	318310	280450	305930	1.37703	0.0116245
A0A1S4EJN6	GTP-binding protein SAR1	LOC103515799		tr|A0A1S4EJN6|A0A1S4EJN6_DIACI;tr|A0A1S3DTJ8|A0A1S3DTJ8_DIACI	tr|A0A1S4EJN6|A0A1S4EJN6_DIACI GTP-binding protein SAR1 OS=Diaphorina citri OX=121845 GN=LOC103515799 PE=3 SV=1	2	7	7	7	48.4	21.393	1030600	834580	875910	913697	722430	752140	738620	737730	1.23852	0.043263
A0A1S4EK31	Cytochrome c oxidase subunit 5B, mitochondrial-like isoform X1	LOC103516448		tr|A0A1S4EK31|A0A1S4EK31_DIACI	tr|A0A1S4EK31|A0A1S4EK31_DIACI Cytochrome c oxidase subunit 5B, mitochondrial-like isoform X1 OS=Diaphorina citri OX=121845 GN=LOC103516448 PE=4 SV=1	1	8	8	8	61.2	15.151	20323000	16313000	15201000	17279000	12829000	11851000	11402000	1.20273e+07	1.43664	0.0311152
A0A1S4EKI7	Isocitrate dehydrogenase [NAD] subunit gamma, mitochondrial-like isoform X1	LOC103516741		tr|A0A1S4EKI7|A0A1S4EKI7_DIACI	tr|A0A1S4EKI7|A0A1S4EKI7_DIACI Isocitrate dehydrogenase [NAD] subunit gamma, mitochondrial-like isoform X1 OS=Diaphorina citri OX=121845 GN=LOC103516741 PE=3 SV=1	1	15	15	15	59.5	42.3	14237000	13337000	12331000	1.33017e+07	8783200	9222300	9009400	9.00497e+06	1.47715	0.00160347
A0A1S4EL69	NADH dehydrogenase [ubiquinone] 1 beta subcomplex subunit 3	LOC103517352		tr|A0A1S4EL69|A0A1S4EL69_DIACI	tr|A0A1S4EL69|A0A1S4EL69_DIACI NADH dehydrogenase [ubiquinone] 1 beta subcomplex subunit 3 OS=Diaphorina citri OX=121845 GN=LOC103517352 PE=3 SV=1	1	3	3	3	29.5	12.38	2503800	2142100	2211600	2.28583e+06	1158300	1500300	1714700	1.45777e+06	1.56804	0.0134933
A0A1S4ELL7	Uncharacterized protein LOC103517768	LOC103517768		tr|A0A1S4ELL7|A0A1S4ELL7_DIACI	tr|A0A1S4ELL7|A0A1S4ELL7_DIACI Uncharacterized protein LOC103517768 OS=Diaphorina citri OX=121845 GN=LOC103517768 PE=4 SV=1	1	53	52	52	47.2	257.29	4983400	3131300	3858600	3991100	7406700	7122800	6972000	7.16717e+06	0.556859	0.00457289
A0A1S4EN86	Probable medium-chain specific acyl-CoA dehydrogenase, mitochondrial	LOC103519316		tr|A0A1S4EN86|A0A1S4EN86_DIACI	tr|A0A1S4EN86|A0A1S4EN86_DIACI Probable medium-chain specific acyl-CoA dehydrogenase, mitochondrial OS=Diaphorina citri OX=121845 GN=LOC103519316 PE=4 SV=1	1	4	4	4	46.7	10.107	2793700	2220200	1976000	2.32997e+06	1644800	1255800	1383400	1428000	1.63163	0.0281688
A0A1S4EP36	Alpha,alpha-trehalose-phosphate synthase [UDP-forming]	LOC103520276		tr|A0A1S4EP36|A0A1S4EP36_DIACI;tr|A0A3Q0IWE9|A0A3Q0IWE9_DIACI	tr|A0A1S4EP36|A0A1S4EP36_DIACI Alpha,alpha-trehalose-phosphate synthase [UDP-forming] OS=Diaphorina citri OX=121845 GN=LOC103520276 PE=3 SV=2	2	22	21	6	47.8	67.851	3497700	3467200	3400700	3455200	2645600	2520300	3051000	2.73897e+06	1.2615	0.0116702
A0A1S4EP55	Dynamin-like 120 kDa protein, mitochondrial	LOC103520337		tr|A0A1S4EP55|A0A1S4EP55_DIACI	tr|A0A1S4EP55|A0A1S4EP55_DIACI Dynamin-like 120 kDa protein, mitochondrial OS=Diaphorina citri OX=121845 GN=LOC103520337 PE=4 SV=1	1	7	7	7	30	36.607	538380	326310	446570	437087	178170	272910	260220	237100	1.84347	0.0427221
A0A1S4EQ49	Ras-related protein Ral-a	LOC108253952		tr|A0A1S4EQ49|A0A1S4EQ49_DIACI;tr|A0A3Q0J703|A0A3Q0J703_DIACI	tr|A0A1S4EQ49|A0A1S4EQ49_DIACI Ras-related protein Ral-a OS=Diaphorina citri OX=121845 GN=LOC108253952 PE=4 SV=1;tr|A0A3Q0J703|A0A3Q0J703_DIACI Conserved oligomeric Golgi complex subunit 1 OS=Diaphorina citri OX=121845 GN=LOC113470184 PE=3 SV=1	2	3	3	3	16.6	26.831	433550	355910	347250	378903	304380	269630	285010	286340	1.32326	0.0339337
A0A1S4ER07	Dihydrolipoamide acetyltransferase component of pyruvate dehydrogenase complex	LOC103522969		tr|A0A1S4ER07|A0A1S4ER07_DIACI	tr|A0A1S4ER07|A0A1S4ER07_DIACI Dihydrolipoamide acetyltransferase component of pyruvate dehydrogenase complex OS=Diaphorina citri OX=121845 GN=LOC103522969 PE=3 SV=1	1	6	6	6	25.9	42.95	129960	71057	131030	110682	211170	195020	237710	214633	0.515681	0.0113114
A0A3Q0JL86	Peptidyl-tRNA hydrolase ICT1, mitochondrial isoform X3	LOC103524187		tr|A0A3Q0JL86|A0A3Q0JL86_DIACI;tr|A0A1S4ES33|A0A1S4ES33_DIACI	tr|A0A3Q0JL86|A0A3Q0JL86_DIACI Peptidyl-tRNA hydrolase ICT1, mitochondrial isoform X3 OS=Diaphorina citri OX=121845 GN=LOC103524187 PE=4 SV=1;tr|A0A1S4ES33|A0A1S4ES33_DIACI Peptidyl-tRNA hydrolase ICT1, mitochondrial isoform X1 OS=Diaphorina citri OX=12184	2	2	2	2	17.6	18.266	109030	92015	91615	97553.3	83868	71536	71499	75634.3	1.2898	0.0361081
A0A1S4ES97	Ubiquitin-conjugating enzyme E2 N isoform X1	LOC103524350		tr|A0A1S4ES97|A0A1S4ES97_DIACI	tr|A0A1S4ES97|A0A1S4ES97_DIACI Ubiquitin-conjugating enzyme E2 N isoform X1 OS=Diaphorina citri OX=121845 GN=LOC103524350 PE=3 SV=1	1	5	5	5	45.7	17.198	1456800	1223700	1252400	1.31097e+06	1107200	962240	926720	998720	1.31265	0.0272698
A0A1S4ESJ1	Ras-related protein Rab-44	LOC103524537		tr|A0A1S4ESJ1|A0A1S4ESJ1_DIACI	tr|A0A1S4ESJ1|A0A1S4ESJ1_DIACI Ras-related protein Rab-44 OS=Diaphorina citri OX=121845 GN=LOC103524537 PE=3 SV=1	1	8	8	8	16.6	66.643	1639200	1365100	1573500	1.52593e+06	1151000	1146500	1268100	1.18853e+06	1.28388	0.0212237
A0A1S4ESJ8	Proteasome subunit alpha type	LOC103524149	FUNCTION: The proteasome is a multicatalytic proteinase complex which is characterized by its ability to cleave peptides with Arg, Phe, Tyr, Leu, and Glu adjacent to the leaving group at neutral or slightly basic pH. {ECO:0000256|RuleBase:RU000551}.	tr|A0A1S4ESJ8|A0A1S4ESJ8_DIACI	tr|A0A1S4ESJ8|A0A1S4ESJ8_DIACI Proteasome subunit alpha type OS=Diaphorina citri OX=121845 GN=LOC103524149 PE=3 SV=1	1	12	12	12	62.5	27.755	2078600	1708400	1910800	1.89927e+06	1308600	1643900	1490900	1.48113e+06	1.28231	0.0442958
A0A1S4ETA6	AFG3-like protein 2	LOC103504941		tr|A0A1S4ETA6|A0A1S4ETA6_DIACI;tr|A0A1S3CTP2|A0A1S3CTP2_DIACI	tr|A0A1S4ETA6|A0A1S4ETA6_DIACI AFG3-like protein 2 OS=Diaphorina citri OX=121845 GN=LOC103504941 PE=3 SV=1	2	23	23	23	38.8	88.352	2165200	2162300	2269100	2.19887e+06	1912200	1760700	1916500	1.86313e+06	1.1802	0.00567397
A0A1X9QGZ5	Cytochrome c oxidase subunit 1	cox1	FUNCTION: Component of the cytochrome c oxidase, the last enzyme in the mitochondrial electron transport chain which drives oxidative phosphorylation. The respiratory chain contains 3 multisubunit complexes succinate dehydrogenase (complex II, CII), ubiquinol-cytochrome c oxidoreductase (cytochrome b-c1 complex, complex III, CIII) and cytochrome c oxidase (complex IV, CIV), that cooperate to tran…	tr|A0A1X9QGZ5|A0A1X9QGZ5_DIACI;tr|A0A343K7D6|A0A343K7D6_DIACI;tr|C4N3C4|C4N3C4_DIACI;tr|A0A4P8KXN2|A0A4P8KXN2_DIACI;tr|A0A4P8KXI2|A0A4P8KXI2_DIACI;tr|A0A4P8L0F0|A0A4P8L0F0_DIACI;tr|A0A4P8KXQ9|A0A4P8KXQ9_DIACI;tr|A0A4P8KXF0|A0A4P8KXF0_DIACI;tr|C4N3T9|C4N3T9_DIACI;tr|C4N3K2|C4N3K2_DIACI;tr|C4N3V2|C4N3V2_DIACI;tr|C4N3B1|C4N3B1_DIACI;tr|C4N3B0|C4N3B0_DIACI;tr|A0A4P8KXT3|A0A4P8KXT3_DIACI;tr|A0A4P8KXS0…	tr|A0A1X9QGZ5|A0A1X9QGZ5_DIACI Cytochrome c oxidase subunit 1 OS=Diaphorina citri OX=121845 GN=cox1 PE=3 SV=1;tr|A0A343K7D6|A0A343K7D6_DIACI Cytochrome c oxidase subunit 1 OS=Diaphorina citri OX=121845 GN=cox1 PE=3 SV=1;tr|C4N3C4|C4N3C4_DIACI Cytochrome c	299	6	6	2	18.9	56.83	2420700	1935500	1952300	2.10283e+06	1638300	1332200	1521200	1.49723e+06	1.40448	0.0293262
A0A1X9QGZ8	ATP synthase subunit a	atp6		tr|A0A1X9QGZ8|A0A1X9QGZ8_DIACI	tr|A0A1X9QGZ8|A0A1X9QGZ8_DIACI ATP synthase subunit a OS=Diaphorina citri OX=121845 GN=atp6 PE=3 SV=1	1	4	4	4	33.5	25.564	1614200	1169900	1058100	1.28073e+06	663300	714460	792790	723517	1.77015	0.0327984
A0A343K7U0	NADH-ubiquinone oxidoreductase chain 1	nad1		tr|A0A343K7U0|A0A343K7U0_DIACI;tr|A0A343K7R4|A0A343K7R4_DIACI;tr|A0A343K782|A0A343K782_DIACI;tr|A0A1X9QH05|A0A1X9QH05_DIACI;tr|A0A3Q0IVD1|A0A3Q0IVD1_DIACI	tr|A0A343K7U0|A0A343K7U0_DIACI NADH-ubiquinone oxidoreductase chain 1 OS=Diaphorina citri OX=121845 GN=nad1 PE=3 SV=1;tr|A0A343K7R4|A0A343K7R4_DIACI NADH-ubiquinone oxidoreductase chain 1 OS=Diaphorina citri OX=121845 GN=nad1 PE=3 SV=1;tr|A0A343K782|A0A343	5	4	4	4	10.2	35.019	2340000	1745200	1715800	1.93367e+06	1178400	1067100	1310600	1.18537e+06	1.63128	0.0254079
A0A343W3L5	Cytochrome c oxidase subunit 2 (Fragment)	COII	FUNCTION: Component of the cytochrome c oxidase, the last enzyme in the mitochondrial electron transport chain which drives oxidative phosphorylation. The respiratory chain contains 3 multisubunit complexes succinate dehydrogenase (complex II, CII), ubiquinol-cytochrome c oxidoreductase (cytochrome b-c1 complex, complex III, CIII) and cytochrome c oxidase (complex IV, CIV), that cooperate to tran…	tr|A0A343W3L5|A0A343W3L5_DIACI;tr|A0A343W3K8|A0A343W3K8_DIACI;tr|A0A343W1Z9|A0A343W1Z9_DIACI;tr|A0A343W1N9|A0A343W1N9_DIACI;tr|A0A343K7D7|A0A343K7D7_DIACI;tr|A0A1X9QH11|A0A1X9QH11_DIACI	tr|A0A343W3L5|A0A343W3L5_DIACI Cytochrome c oxidase subunit 2 (Fragment) OS=Diaphorina citri OX=121845 GN=COII PE=3 SV=1;tr|A0A343W3K8|A0A343W3K8_DIACI Cytochrome c oxidase subunit 2 (Fragment) OS=Diaphorina citri OX=121845 GN=COII PE=3 SV=1;tr|A0A343W1Z9|	6	4	4	4	37.1	24.272	12148000	11073000	9711500	10977500	5584700	6423900	8075600	6.69473e+06	1.63972	0.0135309
A0A3Q0IHL7	Succinate dehydrogenase [ubiquinone] flavoprotein subunit, mitochondrial	LOC103524445	FUNCTION: Flavoprotein (FP) subunit of succinate dehydrogenase (SDH) that is involved in complex II of the mitochondrial electron transport chain and is responsible for transferring electrons from succinate to ubiquinone (coenzyme Q). {ECO:0000256|RuleBase:RU362051}.	tr|A0A3Q0IHL7|A0A3Q0IHL7_DIACI	tr|A0A3Q0IHL7|A0A3Q0IHL7_DIACI Succinate dehydrogenase [ubiquinone] flavoprotein subunit, mitochondrial OS=Diaphorina citri OX=121845 GN=LOC103524445 PE=3 SV=1	1	31	31	31	71.7	72.445	31930000	31675000	29753000	3.11193e+07	22344000	21452000	20591000	2.14623e+07	1.44995	0.000347585
A0A3Q0IMP4	Uncharacterized protein LOC103524863	LOC103524863		tr|A0A3Q0IMP4|A0A3Q0IMP4_DIACI;tr|A0A3Q0IIF0|A0A3Q0IIF0_DIACI	tr|A0A3Q0IMP4|A0A3Q0IMP4_DIACI Uncharacterized protein LOC103524863 OS=Diaphorina citri OX=121845 GN=LOC103524863 PE=4 SV=1;tr|A0A3Q0IIF0|A0A3Q0IIF0_DIACI Uncharacterized protein LOC103524870 OS=Diaphorina citri OX=121845 GN=LOC103524870 PE=4 SV=1	2	5	5	5	20.4	43.305	42446	69563	61741	57916.7	87644	107360	81192	92065.3	0.629082	0.0387205
A0A3Q0IIM8	LOW QUALITY PROTEIN: E3 ubiquitin-protein ligase UBR4	LOC103525056		tr|A0A3Q0IIM8|A0A3Q0IIM8_DIACI	tr|A0A3Q0IIM8|A0A3Q0IIM8_DIACI LOW QUALITY PROTEIN: E3 ubiquitin-protein ligase UBR4 OS=Diaphorina citri OX=121845 GN=LOC103525056 PE=3 SV=1	1	2	2	2	0.6	638.01	35391	35775	33197	34787.7	22055	18097	26980	22377.3	1.55459	0.00995409
A0A3Q0IIX3	LOW QUALITY PROTEIN: coatomer subunit alpha-like	LOC103504937		tr|A0A3Q0IIX3|A0A3Q0IIX3_DIACI;tr|A0A1S3DLT1|A0A1S3DLT1_DIACI	tr|A0A3Q0IIX3|A0A3Q0IIX3_DIACI LOW QUALITY PROTEIN: coatomer subunit alpha-like OS=Diaphorina citri OX=121845 GN=LOC103504937 PE=4 SV=1	2	27	27	18	43.1	153.07	1166100	1104000	1418900	1.22967e+06	875630	811600	1007500	898243	1.36897	0.0418609
A0A3Q0IJ19	Unc-112-related protein	LOC103505036		tr|A0A3Q0IJ19|A0A3Q0IJ19_DIACI;tr|A0A3Q0JI93|A0A3Q0JI93_DIACI	tr|A0A3Q0IJ19|A0A3Q0IJ19_DIACI Unc-112-related protein OS=Diaphorina citri OX=121845 GN=LOC103505036 PE=4 SV=1	2	11	9	9	29.4	69.605	450480	376330	368060	398290	263600	263630	307500	278243	1.43144	0.0161282
A0A3Q0IJC7	Cytochrome P450 6a2	LOC103505079		tr|A0A3Q0IJC7|A0A3Q0IJC7_DIACI	tr|A0A3Q0IJC7|A0A3Q0IJC7_DIACI Cytochrome P450 6a2 OS=Diaphorina citri OX=121845 GN=LOC103505079 PE=3 SV=1	1	9	9	9	17.5	97.37	649930	889790	697300	745673	1211500	1469700	1752900	1.47803e+06	0.504504	0.0132549
A0A3Q0IKI2	Probable medium-chain specific acyl-CoA dehydrogenase, mitochondrial	LOC103505664		tr|A0A3Q0IKI2|A0A3Q0IKI2_DIACI	tr|A0A3Q0IKI2|A0A3Q0IKI2_DIACI Probable medium-chain specific acyl-CoA dehydrogenase, mitochondrial OS=Diaphorina citri OX=121845 GN=LOC103505664 PE=3 SV=1	1	11	11	11	57.8	30.229	4037600	4167200	3545400	3.91673e+06	3009800	2599800	3248100	2.95257e+06	1.32655	0.0227507
A0A3Q0IKK7	Citrate synthase	LOC103505691		tr|A0A3Q0IKK7|A0A3Q0IKK7_DIACI;tr|A0A1S3CUV0|A0A1S3CUV0_DIACI	tr|A0A3Q0IKK7|A0A3Q0IKK7_DIACI Citrate synthase OS=Diaphorina citri OX=121845 GN=LOC103505691 PE=3 SV=1;tr|A0A1S3CUV0|A0A1S3CUV0_DIACI Citrate synthase OS=Diaphorina citri OX=121845 GN=LOC103505689 PE=3 SV=1	2	24	24	24	58.2	51.2	62368000	49543000	50899000	54270000	32057000	36341000	40099000	3.61657e+07	1.50059	0.0180747
A0A3Q0IKV2	Junctophilin-1	LOC103505743		tr|A0A3Q0IKV2|A0A3Q0IKV2_DIACI	tr|A0A3Q0IKV2|A0A3Q0IKV2_DIACI Junctophilin-1 OS=Diaphorina citri OX=121845 GN=LOC103505743 PE=3 SV=1	1	1	1	1	2.4	96.531	61106	45079	48058	51414.3	25699	39523	28963	31395	1.63766	0.036119
A0A3Q0IKZ2	Calcium-transporting ATPase	LOC103505247	FUNCTION: This magnesium-dependent enzyme catalyzes the hydrolysis of ATP coupled with the transport of calcium. {ECO:0000256|RuleBase:RU361146}.	tr|A0A3Q0IKZ2|A0A3Q0IKZ2_DIACI	tr|A0A3Q0IKZ2|A0A3Q0IKZ2_DIACI Calcium-transporting ATPase OS=Diaphorina citri OX=121845 GN=LOC103505247 PE=3 SV=1	1	17	13	13	24.8	106.92	1656300	1439300	1565000	1.55353e+06	1011800	1122200	1268100	1.13403e+06	1.36992	0.0125294
A0A3Q0IL61	Sodium/potassium-transporting ATPase subunit beta-1-like	LOC103505949		tr|A0A3Q0IL61|A0A3Q0IL61_DIACI	tr|A0A3Q0IL61|A0A3Q0IL61_DIACI Sodium/potassium-transporting ATPase subunit beta-1-like OS=Diaphorina citri OX=121845 GN=LOC103505949 PE=3 SV=1	1	3	3	3	8.3	40.248	297770	272060	331060	300297	222050	216770	261490	233437	1.28642	0.0392357
A0A3Q0ILD3	Kinesin light chain	LOC103506178	FUNCTION: Kinesin is a microtubule-associated force-producing protein that may play a role in organelle transport. {ECO:0000256|RuleBase:RU367020}.	tr|A0A3Q0ILD3|A0A3Q0ILD3_DIACI;tr|A0A3Q0ILM2|A0A3Q0ILM2_DIACI	tr|A0A3Q0ILD3|A0A3Q0ILD3_DIACI Kinesin light chain OS=Diaphorina citri OX=121845 GN=LOC103506178 PE=3 SV=1	2	10	10	10	36	49.912	220770	208730	246510	225337	406530	425600	328580	386903	0.582411	0.00699818
A0A3Q0ILL2	Squamous cell carcinoma antigen recognized by T-cells 3-like	LOC103506169		tr|A0A3Q0ILL2|A0A3Q0ILL2_DIACI	tr|A0A3Q0ILL2|A0A3Q0ILL2_DIACI Squamous cell carcinoma antigen recognized by T-cells 3-like OS=Diaphorina citri OX=121845 GN=LOC103506169 PE=4 SV=1	1	2	2	2	3.5	97.007	54089	47043	53390	51507.3		32244	23511	27877.5	1.84763	0.0122827
A0A3Q0ILM8	Casein kinase I	LOC103506322		tr|A0A3Q0ILM8|A0A3Q0ILM8_DIACI	tr|A0A3Q0ILM8|A0A3Q0ILM8_DIACI Casein kinase I OS=Diaphorina citri OX=121845 GN=LOC103506322 PE=4 SV=1	1	3	3	3	11.2	47.139	63773	64770	62488	63677	41010	50580	55936	49175.3	1.2949	0.0303748
A0A3Q0ILY6	Papilin-like	LOC103506439		tr|A0A3Q0ILY6|A0A3Q0ILY6_DIACI	tr|A0A3Q0ILY6|A0A3Q0ILY6_DIACI Papilin-like OS=Diaphorina citri OX=121845 GN=LOC103506439 PE=4 SV=1	1	4	4	4	13.3	39.12	352310	296130	335590	328010	189960	234480	208310	210917	1.55516	0.00513851
A0A3Q0IMQ9	Pyruvate carboxylase, mitochondrial isoform X1	LOC103506729		tr|A0A3Q0IMQ9|A0A3Q0IMQ9_DIACI;tr|A0A3Q0IMH8|A0A3Q0IMH8_DIACI;tr|A0A3Q0IT26|A0A3Q0IT26_DIACI;tr|A0A3Q0J2I0|A0A3Q0J2I0_DIACI	tr|A0A3Q0IMQ9|A0A3Q0IMQ9_DIACI Pyruvate carboxylase, mitochondrial isoform X1 OS=Diaphorina citri OX=121845 GN=LOC103506729 PE=4 SV=1;tr|A0A3Q0IMH8|A0A3Q0IMH8_DIACI Pyruvate carboxylase, mitochondrial isoform X4 OS=Diaphorina citri OX=121845 GN=LOC10350672	4	37	37	37	68.4	85.503	34403000	30963000	29188000	31518000	24601000	22591000	24321000	2.38377e+07	1.32219	0.00972538
A0A3Q0IMZ9	Phenoloxidase subunit 1-like	LOC103506840		tr|A0A3Q0IMZ9|A0A3Q0IMZ9_DIACI	tr|A0A3Q0IMZ9|A0A3Q0IMZ9_DIACI Phenoloxidase subunit 1-like OS=Diaphorina citri OX=121845 GN=LOC103506840 PE=4 SV=1	1	18	18	10	45.2	55.093	11233000	9689200	9240600	1.00543e+07	5380500	6977100	7948100	6.76857e+06	1.48544	0.0268427
A0A3Q0IN75	LOW QUALITY PROTEIN: molybdopterin biosynthesis protein CNX1-like	LOC103524596	FUNCTION: Catalyzes two steps in the biosynthesis of the molybdenum cofactor. In the first step, molybdopterin is adenylated. Subsequently, molybdate is inserted into adenylated molybdopterin and AMP is released. {ECO:0000256|RuleBase:RU365090}.	tr|A0A3Q0IN75|A0A3Q0IN75_DIACI;tr|A0A1S3DTC3|A0A1S3DTC3_DIACI	tr|A0A3Q0IN75|A0A3Q0IN75_DIACI LOW QUALITY PROTEIN: molybdopterin biosynthesis protein CNX1-like OS=Diaphorina citri OX=121845 GN=LOC103524596 PE=3 SV=1	2	11	11	4	25.5	81.127	580030	436540	421610	479393	280120	340370	340190	320227	1.49704	0.0428488
A0A3Q0INC0	alpha-glucosidase	LOC108252122		tr|A0A3Q0INC0|A0A3Q0INC0_DIACI	tr|A0A3Q0INC0|A0A3Q0INC0_DIACI alpha-glucosidase OS=Diaphorina citri OX=121845 GN=LOC108252122 PE=4 SV=1	1	13	13	13	38.8	71.376	1424200	1260300	1399700	1361400	1551900	2006700	2004300	1854300	0.734185	0.0366225
A0A3Q0INT3	Pyruvate dehydrogenase E1 component subunit beta	LOC103507242	FUNCTION: The pyruvate dehydrogenase complex catalyzes the overall conversion of pyruvate to acetyl-CoA and CO2. {ECO:0000256|RuleBase:RU364074}.	tr|A0A3Q0INT3|A0A3Q0INT3_DIACI	tr|A0A3Q0INT3|A0A3Q0INT3_DIACI Pyruvate dehydrogenase E1 component subunit beta OS=Diaphorina citri OX=121845 GN=LOC103507242 PE=4 SV=1	1	9	9	5	59.5	26.848	6475700	4855000	5174100	5501600	4281600	4014400	3951500	4082500	1.34761	0.0485608
A0A3Q0INU3	Dystroglycan 1	LOC103507479		tr|A0A3Q0INU3|A0A3Q0INU3_DIACI	tr|A0A3Q0INU3|A0A3Q0INU3_DIACI Dystroglycan 1 OS=Diaphorina citri OX=121845 GN=LOC103507479 PE=4 SV=1	1	2	2	2	2.6	135.8	93300	78451	90414	87388.3	41157		57032	49094.5	1.78	0.0193648
A0A3Q0IP13	Dihydrolipoyl dehydrogenase, mitochondrial-like	LOC103525038		tr|A0A3Q0IP13|A0A3Q0IP13_DIACI	tr|A0A3Q0IP13|A0A3Q0IP13_DIACI Dihydrolipoyl dehydrogenase, mitochondrial-like OS=Diaphorina citri OX=121845 GN=LOC103525038 PE=3 SV=1	1	19	19	19	36.8	81.948	24055000	21744000	22479000	2.27593e+07	14545000	19102000	17506000	17051000	1.33478	0.0189709
A0A3Q0IP58	Succinate dehydrogenase [ubiquinone] iron-sulfur subunit, mitochondrial-like	LOC113466684		tr|A0A3Q0IP58|A0A3Q0IP58_DIACI	tr|A0A3Q0IP58|A0A3Q0IP58_DIACI Succinate dehydrogenase [ubiquinone] iron-sulfur subunit, mitochondrial-like OS=Diaphorina citri OX=121845 GN=LOC113466684 PE=4 SV=1	1	1	1	1	21.1	8.4357	776800	766400	727200	756800	448370	479370	519670	482470	1.56859	0.000428141
A0A3Q0IP74	Protein lap4	LOC103505322		tr|A0A3Q0IP74|A0A3Q0IP74_DIACI	tr|A0A3Q0IP74|A0A3Q0IP74_DIACI Protein lap4 OS=Diaphorina citri OX=121845 GN=LOC103505322 PE=4 SV=1	1	12	12	11	17.2	128.51	164120	240580	251600	218767	400170	368330	304030	357510	0.611918	0.024515
A0A3Q0IP96	Glycerol-3-phosphate dehydrogenase	LOC103507480		tr|A0A3Q0IP96|A0A3Q0IP96_DIACI	tr|A0A3Q0IP96|A0A3Q0IP96_DIACI Glycerol-3-phosphate dehydrogenase OS=Diaphorina citri OX=121845 GN=LOC103507480 PE=3 SV=1	1	23	23	18	60.3	58.533	27063000	22203000	21162000	23476000	14355000	14973000	17624000	1.56507e+07	1.5	0.0196328
A0A3Q0IPC6	Methyl farnesoate epoxidase-like	LOC108251894		tr|A0A3Q0IPC6|A0A3Q0IPC6_DIACI;tr|A0A1S4E6P1|A0A1S4E6P1_DIACI	tr|A0A3Q0IPC6|A0A3Q0IPC6_DIACI Methyl farnesoate epoxidase-like OS=Diaphorina citri OX=121845 GN=LOC108251894 PE=3 SV=1	2	5	5	4	28.9	25.935	1442300	1424100	1277600	1.38133e+06	835700	958370	1041400	945157	1.46149	0.00532535
A0A3Q0IPD4	85/88 kDa calcium-independent phospholipase A2-like	LOC103507537		tr|A0A3Q0IPD4|A0A3Q0IPD4_DIACI	tr|A0A3Q0IPD4|A0A3Q0IPD4_DIACI 85/88 kDa calcium-independent phospholipase A2-like OS=Diaphorina citri OX=121845 GN=LOC103507537 PE=4 SV=1	1	17	17	17	56.9	46.972	6780400	7584000	6585200	6983200	4682200	4938700	5884500	5.16847e+06	1.35112	0.0189681
A0A3Q0IPL5	Melanotransferrin	LOC103505481		tr|A0A3Q0IPL5|A0A3Q0IPL5_DIACI;tr|A0A1S4ERD7|A0A1S4ERD7_DIACI	tr|A0A3Q0IPL5|A0A3Q0IPL5_DIACI Melanotransferrin OS=Diaphorina citri OX=121845 GN=LOC103505481 PE=4 SV=1	2	6	6	6	17.7	62.406	235060	236410	243340	238270	201510	193790	198860	198053	1.20306	0.000299757
A0A3Q0IPN2	Uncharacterized protein LOC103507566	LOC103507566		tr|A0A3Q0IPN2|A0A3Q0IPN2_DIACI	tr|A0A3Q0IPN2|A0A3Q0IPN2_DIACI Uncharacterized protein LOC103507566 OS=Diaphorina citri OX=121845 GN=LOC103507566 PE=4 SV=1	1	6	6	6	11.4	76.127	183590	169950	164320	172620	317960	228800	240070	262277	0.65816	0.0350541
A0A3Q0IPQ3	Uncharacterized protein LOC113465309	LOC113465309		tr|A0A3Q0IPQ3|A0A3Q0IPQ3_DIACI;tr|A0A1S3CUH4|A0A1S3CUH4_DIACI	tr|A0A3Q0IPQ3|A0A3Q0IPQ3_DIACI Uncharacterized protein LOC113465309 OS=Diaphorina citri OX=121845 GN=LOC113465309 PE=4 SV=1;tr|A0A1S3CUH4|A0A1S3CUH4_DIACI Uncharacterized protein LOC103505518 isoform X1 OS=Diaphorina citri OX=121845 GN=LOC103505518 PE=4 SV	2	4	4	4	18.3	68.091	720440	664540	514810	633263	882080	866500	760850	836477	0.75706	0.0481637
A0A3Q0IQ04	Transferrin	LOC103507786	FUNCTION: Transferrins are iron binding transport proteins which bind Fe(3+) ion in association with the binding of an anion, usually bicarbonate. {ECO:0000256|PIRNR:PIRNR002549}.	tr|A0A3Q0IQ04|A0A3Q0IQ04_DIACI	tr|A0A3Q0IQ04|A0A3Q0IQ04_DIACI Transferrin OS=Diaphorina citri OX=121845 GN=LOC103507786 PE=3 SV=1	1	42	42	22	65.5	77.684	60091000	57644000	50337000	56024000	27030000	27868000	29477000	28125000	1.99196	0.000759912
A0A482LU45	Cytochrome P450 CYP6BD5	CYP6BD5		tr|A0A482LU45|A0A482LU45_DIACI;tr|A0A3Q0IQ47|A0A3Q0IQ47_DIACI;tr|A0A3Q0JDH6|A0A3Q0JDH6_DIACI	tr|A0A482LU45|A0A482LU45_DIACI Cytochrome P450 CYP6BD5 OS=Diaphorina citri OX=121845 GN=CYP6BD5 PE=2 SV=1;tr|A0A3Q0IQ47|A0A3Q0IQ47_DIACI Cytochrome P450 9e2-like OS=Diaphorina citri OX=121845 GN=LOC103507942 PE=3 SV=1;tr|A0A3Q0JDH6|A0A3Q0JDH6_DIACI Cytochr	3	7	7	7	16.2	60.937	402230	334170	362380	366260	172820	222440	244880	213380	1.71647	0.00623154
A0A3Q0IQB1	Mitochondrial carrier homolog 1-like isoform X2	LOC103507887		tr|A0A3Q0IQB1|A0A3Q0IQB1_DIACI;tr|A0A3Q0IQ65|A0A3Q0IQ65_DIACI	tr|A0A3Q0IQB1|A0A3Q0IQB1_DIACI Mitochondrial carrier homolog 1-like isoform X2 OS=Diaphorina citri OX=121845 GN=LOC103507887 PE=3 SV=1;tr|A0A3Q0IQ65|A0A3Q0IQ65_DIACI Mitochondrial carrier homolog 1-like isoform X1 OS=Diaphorina citri OX=121845 GN=LOC103507	2	3	3	3	14.2	34.246	118930	143000	149170	137033	72961	85718	114990	91223	1.50218	0.0416471
A0A3Q0IQA5	C-1-tetrahydrofolate synthase, cytoplasmic	LOC103507868		tr|A0A3Q0IQA5|A0A3Q0IQA5_DIACI	tr|A0A3Q0IQA5|A0A3Q0IQA5_DIACI C-1-tetrahydrofolate synthase, cytoplasmic OS=Diaphorina citri OX=121845 GN=LOC103507868 PE=3 SV=1	1	24	24	23	45.7	83.948	4182500	3466800	3149000	3.59943e+06	2514200	2865800	2283600	2.55453e+06	1.40904	0.0403067
A0A3Q0IQQ7	Ste24 endopeptidase	LOC103505974		tr|A0A3Q0IQQ7|A0A3Q0IQQ7_DIACI	tr|A0A3Q0IQQ7|A0A3Q0IQQ7_DIACI Ste24 endopeptidase OS=Diaphorina citri OX=121845 GN=LOC103505974 PE=4 SV=1	1	3	3	1	5.7	91.224	58734	83115	72604	71484.3	39455	50907	47735	46032.3	1.55292	0.0315115
A0A3Q0IR11	Carboxypeptidase D-like	LOC103508259		tr|A0A3Q0IR11|A0A3Q0IR11_DIACI	tr|A0A3Q0IR11|A0A3Q0IR11_DIACI Carboxypeptidase D-like OS=Diaphorina citri OX=121845 GN=LOC103508259 PE=3 SV=1	1	4	4	4	9.7	73.001	144730	157890	142750	148457	73491	101220	95186	89965.7	1.65015	0.00376558
A0A3Q0IR34	Prohibitin	LOC103505750		tr|A0A3Q0IR34|A0A3Q0IR34_DIACI;tr|A0A1S3CUZ0|A0A1S3CUZ0_DIACI	tr|A0A3Q0IR34|A0A3Q0IR34_DIACI Prohibitin OS=Diaphorina citri OX=121845 GN=LOC103505750 PE=3 SV=1;tr|A0A1S3CUZ0|A0A1S3CUZ0_DIACI Spidroin-2-like OS=Diaphorina citri OX=121845 GN=LOC103505748 PE=3 SV=2	2	4	4	4	60	9.0624	3182200	2251200	2434900	2.62277e+06	1879900	1361700	1549300	1.59697e+06	1.64234	0.0335069
A0A3Q0IR49	Uncharacterized protein LOC103508334	LOC103508334		tr|A0A3Q0IR49|A0A3Q0IR49_DIACI	tr|A0A3Q0IR49|A0A3Q0IR49_DIACI Uncharacterized protein LOC103508334 OS=Diaphorina citri OX=121845 GN=LOC103508334 PE=4 SV=1	1	1	1	1	2.3	71.015	32743	55948	54027	47572.7	21570	27518	27339	25475.7	1.86738	0.0452737
A0A3Q0IRN0	LOW QUALITY PROTEIN: uncharacterized protein LOC103508543	LOC103508543		tr|A0A3Q0IRN0|A0A3Q0IRN0_DIACI	tr|A0A3Q0IRN0|A0A3Q0IRN0_DIACI LOW QUALITY PROTEIN: uncharacterized protein LOC103508543 OS=Diaphorina citri OX=121845 GN=LOC103508543 PE=4 SV=1	1	4	4	4	7.9	100.66	84895	90415	71937	82415.7	54384	59525	53799	55902.7	1.47427	0.010072
A0A3Q0ISD2	glutaminase	LOC103508916		tr|A0A3Q0ISD2|A0A3Q0ISD2_DIACI	tr|A0A3Q0ISD2|A0A3Q0ISD2_DIACI glutaminase OS=Diaphorina citri OX=121845 GN=LOC103508916 PE=3 SV=1	1	4	4	4	9.8	56.507	153700	161280	142030	152337	49234	107330	97025	84529.7	1.80217	0.0224372
A0A3Q0IST3	Aminopeptidase N-like	LOC103509111		tr|A0A3Q0IST3|A0A3Q0IST3_DIACI	tr|A0A3Q0IST3|A0A3Q0IST3_DIACI Aminopeptidase N-like OS=Diaphorina citri OX=121845 GN=LOC103509111 PE=3 SV=1	1	23	23	18	49.8	61.863	11265000	8577600	8395000	9.41253e+06	13078000	11387000	12807000	12424000	0.757609	0.0475427
A0A3Q0ISV8	AMP deaminase	LOC103509162		tr|A0A3Q0ISV8|A0A3Q0ISV8_DIACI	tr|A0A3Q0ISV8|A0A3Q0ISV8_DIACI AMP deaminase OS=Diaphorina citri OX=121845 GN=LOC103509162 PE=3 SV=1	1	18	18	11	31.4	135.66	903420	794040	872590	856683	1100000	1172300	1153700	1142000	0.750161	0.00187812
A0A3Q0ISW2	40S ribosomal protein S16 isoform X1	LOC103506377		tr|A0A3Q0ISW2|A0A3Q0ISW2_DIACI	tr|A0A3Q0ISW2|A0A3Q0ISW2_DIACI 40S ribosomal protein S16 isoform X1 OS=Diaphorina citri OX=121845 GN=LOC103506377 PE=3 SV=1	1	7	7	7	50	11.703	2024900	1716700	2100100	1.94723e+06	1528600	1402100	1235200	1.38863e+06	1.40227	0.018196
A0A3Q0ITJ1	V-type proton ATPase subunit a	LOC113467546	FUNCTION: Essential component of the vacuolar proton pump (V-ATPase), a multimeric enzyme that catalyzes the translocation of protons across the membranes. Required for assembly and activity of the V-ATPase. {ECO:0000256|RuleBase:RU361189}.	tr|A0A3Q0ITJ1|A0A3Q0ITJ1_DIACI	tr|A0A3Q0ITJ1|A0A3Q0ITJ1_DIACI V-type proton ATPase subunit a OS=Diaphorina citri OX=121845 GN=LOC113467546 PE=3 SV=1	1	5	5	5	4.4	96.522	1164800	1264500	1331900	1.25373e+06	944640	1054800	980420	993287	1.26221	0.0111513
A0A3Q0ITL3	Cysteine proteinase CG12163	LOC103509461		tr|A0A3Q0ITL3|A0A3Q0ITL3_DIACI	tr|A0A3Q0ITL3|A0A3Q0ITL3_DIACI Cysteine proteinase CG12163 OS=Diaphorina citri OX=121845 GN=LOC103509461 PE=4 SV=1	1	4	4	4	27.6	14.075	2623000	2130500	1804700	2.18607e+06	4728000	3495400	3079400	3767600	0.580228	0.0450191
A0A3Q0ITM9	NADH-ubiquinone oxidoreductase 75 kDa subunit, mitochondrial	LOC103507325		tr|A0A3Q0ITM9|A0A3Q0ITM9_DIACI;tr|A0A3Q0JJH2|A0A3Q0JJH2_DIACI;tr|A0A3Q0JMY0|A0A3Q0JMY0_DIACI	tr|A0A3Q0ITM9|A0A3Q0ITM9_DIACI NADH-ubiquinone oxidoreductase 75 kDa subunit, mitochondrial OS=Diaphorina citri OX=121845 GN=LOC103507325 PE=4 SV=1	3	26	26	26	74.2	51.717	27850000	21256000	20769000	2.32917e+07	18119000	15574000	14597000	1.60967e+07	1.44699	0.045798
A0A3Q0ITU0	3-dehydrosphinganine reductase	LOC103509594		tr|A0A3Q0ITU0|A0A3Q0ITU0_DIACI	tr|A0A3Q0ITU0|A0A3Q0ITU0_DIACI 3-dehydrosphinganine reductase OS=Diaphorina citri OX=121845 GN=LOC103509594 PE=4 SV=1	1	1	1	1	2.8	42.747		22777	23131	22954	39387	45395	39428	41403.3	0.5544	0.00563174
A0A3Q0IU70	Obscurin-like	LOC113466744		tr|A0A3Q0IU70|A0A3Q0IU70_DIACI	tr|A0A3Q0IU70|A0A3Q0IU70_DIACI Obscurin-like OS=Diaphorina citri OX=121845 GN=LOC113466744 PE=4 SV=1	1	7	7	7	80.9	10.357	1691100	1434300	1292800	1.47273e+06	1129200	1114600	1149800	1131200	1.30192	0.0433049
A0A3Q0IUC6	Uncharacterized protein LOC103509806	LOC103509806		tr|A0A3Q0IUC6|A0A3Q0IUC6_DIACI;tr|A0A1S3DQB1|A0A1S3DQB1_DIACI	tr|A0A3Q0IUC6|A0A3Q0IUC6_DIACI Uncharacterized protein LOC103509806 OS=Diaphorina citri OX=121845 GN=LOC103509806 PE=4 SV=1	2	9	9	9	22.7	77.93	825840	628980	685420	713413	366360	329430	381900	359230	1.98595	0.00426332
A0A3Q0IUI3	Cytochrome c oxidase subunit 6A1, mitochondrial-like isoform X2	LOC103509941		tr|A0A3Q0IUI3|A0A3Q0IUI3_DIACI	tr|A0A3Q0IUI3|A0A3Q0IUI3_DIACI Cytochrome c oxidase subunit 6A1, mitochondrial-like isoform X2 OS=Diaphorina citri OX=121845 GN=LOC103509941 PE=3 SV=1	1	4	4	1	60	12.186	10898000	7741200	6970200	8.53647e+06	5388700	4988600	5003100	5126800	1.66507	0.0477806
A0A3Q0IUM2	Lysine-specific histone demethylase 1B	LOC103507790		tr|A0A3Q0IUM2|A0A3Q0IUM2_DIACI	tr|A0A3Q0IUM2|A0A3Q0IUM2_DIACI Lysine-specific histone demethylase 1B OS=Diaphorina citri OX=121845 GN=LOC103507790 PE=4 SV=1	1	6	5	5	40.4	24.73	193080	219770	242420	218423	289510	289710	291000	290073	0.752993	0.00737413
A0A3Q0IV15	Uncharacterized protein LOC113466743	LOC113466743		tr|A0A3Q0IV15|A0A3Q0IV15_DIACI	tr|A0A3Q0IV15|A0A3Q0IV15_DIACI Uncharacterized protein LOC113466743 OS=Diaphorina citri OX=121845 GN=LOC113466743 PE=4 SV=1	1	5	5	5	40.2	322.7	370920	397090	425180	397730	282090	155200	290630	242640	1.63918	0.0289779
A0A3Q0IV47	Atlastin-like	LOC103510262		tr|A0A3Q0IV47|A0A3Q0IV47_DIACI	tr|A0A3Q0IV47|A0A3Q0IV47_DIACI Atlastin-like OS=Diaphorina citri OX=121845 GN=LOC103510262 PE=3 SV=1	1	11	11	7	33.6	52.311	946740	684290	749310	793447	525800	504400	617060	549087	1.44503	0.0470224
A0A3Q0IVL1	Dolichyl-diphosphooligosaccharide--protein glycosyltransferase subunit 2	LOC103510455	FUNCTION: Subunit of the oligosaccharyl transferase (OST) complex that catalyzes the initial transfer of a defined glycan (Glc(3)Man(9)GlcNAc(2) in eukaryotes) from the lipid carrier dolichol-pyrophosphate to an asparagine residue within an Asn-X-Ser/Thr consensus motif in nascent polypeptide chains, the first step in protein N-glycosylation. N-glycosylation occurs cotranslationally and the compl…	tr|A0A3Q0IVL1|A0A3Q0IVL1_DIACI	tr|A0A3Q0IVL1|A0A3Q0IVL1_DIACI Dolichyl-diphosphooligosaccharide--protein glycosyltransferase subunit 2 OS=Diaphorina citri OX=121845 GN=LOC103510455 PE=3 SV=1	1	5	5	5	32.4	22.645	420300	581280	491620	497733	183410	377640	272850	277967	1.79062	0.0394232
A0A3Q0IVR0	Eukaryotic translation initiation factor 3 subunit A-like	LOC113465336		tr|A0A3Q0IVR0|A0A3Q0IVR0_DIACI	tr|A0A3Q0IVR0|A0A3Q0IVR0_DIACI Eukaryotic translation initiation factor 3 subunit A-like OS=Diaphorina citri OX=121845 GN=LOC113465336 PE=4 SV=1	1	3	3	3	25.2	24.534	566480	400230	359180	441963	267810	268810	258020	264880	1.66854	0.0493093
A0A3Q0IW98	3(2),5-bisphosphate nucleotidase 1	LOC103508187		tr|A0A3Q0IW98|A0A3Q0IW98_DIACI	tr|A0A3Q0IW98|A0A3Q0IW98_DIACI 3(2),5-bisphosphate nucleotidase 1 OS=Diaphorina citri OX=121845 GN=LOC103508187 PE=3 SV=1	1	7	7	7	60.3	18.999	1594800	1220100	1288200	1367700	919080	951690	885650	918807	1.48856	0.018411
A0A3Q0IWB0	Transforming growth factor-beta-induced protein ig-h3-like	LOC103508562		tr|A0A3Q0IWB0|A0A3Q0IWB0_DIACI;tr|A0A3Q0JP17|A0A3Q0JP17_DIACI	tr|A0A3Q0IWB0|A0A3Q0IWB0_DIACI Transforming growth factor-beta-induced protein ig-h3-like OS=Diaphorina citri OX=121845 GN=LOC103508562 PE=4 SV=1	2	11	11	9	24.6	76.684	954560	926540	774340	885147	1318700	1150300	1255200	1241400	0.713023	0.00875083
A0A3Q0IWG3	NADPH--cytochrome P450 reductase-like	LOC103510852		tr|A0A3Q0IWG3|A0A3Q0IWG3_DIACI	tr|A0A3Q0IWG3|A0A3Q0IWG3_DIACI NADPH--cytochrome P450 reductase-like OS=Diaphorina citri OX=121845 GN=LOC103510852 PE=4 SV=1	1	3	3	3	44.9	9.1151	622320	461450	410530	498100	306510	287330	249070	280970	1.77279	0.0302496
A0A3Q0IWG5	NADPH--cytochrome P450 reductase-like	LOC103510851		tr|A0A3Q0IWG5|A0A3Q0IWG5_DIACI	tr|A0A3Q0IWG5|A0A3Q0IWG5_DIACI NADPH--cytochrome P450 reductase-like OS=Diaphorina citri OX=121845 GN=LOC103510851 PE=4 SV=1	1	5	5	5	35.1	23.922	636340	587730	544850	589640	359130	357540	313490	343387	1.71713	0.00125718
A0A3Q0IWI8	LOW QUALITY PROTEIN: spectrin beta chain, non-erythrocytic 1-like	LOC103510935		tr|A0A3Q0IWI8|A0A3Q0IWI8_DIACI;tr|A0A1S3DMF4|A0A1S3DMF4_DIACI;tr|A0A3Q0JK33|A0A3Q0JK33_DIACI	tr|A0A3Q0IWI8|A0A3Q0IWI8_DIACI LOW QUALITY PROTEIN: spectrin beta chain, non-erythrocytic 1-like OS=Diaphorina citri OX=121845 GN=LOC103510935 PE=3 SV=1	3	98	98	98	35.3	448.65	9500100	7950600	7666700	8.37247e+06	5381600	5281600	4982600	5.21527e+06	1.60538	0.00560676
A0A3Q0IWL7	Uncharacterized protein LOC103510933	LOC103510933		tr|A0A3Q0IWL7|A0A3Q0IWL7_DIACI	tr|A0A3Q0IWL7|A0A3Q0IWL7_DIACI Uncharacterized protein LOC103510933 OS=Diaphorina citri OX=121845 GN=LOC103510933 PE=4 SV=1	1	2	2	2	9	30.354	223930	153390	215130	197483	133530	127150	140830	133837	1.47555	0.0476579
A0A3Q0IX09	Fasciclin-1	LOC103511117		tr|A0A3Q0IX09|A0A3Q0IX09_DIACI	tr|A0A3Q0IX09|A0A3Q0IX09_DIACI Fasciclin-1 OS=Diaphorina citri OX=121845 GN=LOC103511117 PE=4 SV=1	1	10	10	10	24.7	67.888	415880	704490	587000	569123	854460	792120	785000	810527	0.702165	0.0495136
A0A3Q0IXC7	Innexin	LOC103508760	FUNCTION: Structural component of the gap junctions. {ECO:0000256|RuleBase:RU010713}.	tr|A0A3Q0IXC7|A0A3Q0IXC7_DIACI	tr|A0A3Q0IXC7|A0A3Q0IXC7_DIACI Innexin OS=Diaphorina citri OX=121845 GN=LOC103508760 PE=3 SV=1	1	5	5	5	25.4	35.063	591770	606830	606200	601600	549020	575060	544320	556133	1.08175	0.0133804
A0A3Q0IXF1	Carbonyl reductase [NADPH] 1-like	LOC113468298		tr|A0A3Q0IXF1|A0A3Q0IXF1_DIACI	tr|A0A3Q0IXF1|A0A3Q0IXF1_DIACI Carbonyl reductase [NADPH] 1-like OS=Diaphorina citri OX=121845 GN=LOC113468298 PE=4 SV=1	1	3	3	3	37	15.707	757270	812750	788260	786093	930770	859000	877170	888980	0.884264	0.0186244
A0A3Q0IXP1	NADH dehydrogenase [ubiquinone] flavoprotein 1, mitochondrial-like	LOC103509270		tr|A0A3Q0IXP1|A0A3Q0IXP1_DIACI	tr|A0A3Q0IXP1|A0A3Q0IXP1_DIACI NADH dehydrogenase [ubiquinone] flavoprotein 1, mitochondrial-like OS=Diaphorina citri OX=121845 GN=LOC103509270 PE=4 SV=1	1	4	4	4	32.5	17.418	2316200	1624600	1606100	1.84897e+06	746090	957560	1078600	927417	1.99367	0.0219368
A0A3Q0IXP5	Transportin-1-like	LOC103511466		tr|A0A3Q0IXP5|A0A3Q0IXP5_DIACI;tr|A0A3Q0IXQ5|A0A3Q0IXQ5_DIACI	tr|A0A3Q0IXP5|A0A3Q0IXP5_DIACI Transportin-1-like OS=Diaphorina citri OX=121845 GN=LOC103511466 PE=4 SV=1;tr|A0A3Q0IXQ5|A0A3Q0IXQ5_DIACI Transportin-1-like isoform X1 OS=Diaphorina citri OX=121845 GN=LOC113465282 PE=4 SV=1	2	1	1	1	3.9	34.186	34297	26547	27938	29594	16442	12753	16113	15102.7	1.95952	0.00552049
A0A3Q0IXQ7	Malate dehydrogenase, mitochondrial-like	LOC103509286		tr|A0A3Q0IXQ7|A0A3Q0IXQ7_DIACI	tr|A0A3Q0IXQ7|A0A3Q0IXQ7_DIACI Malate dehydrogenase, mitochondrial-like OS=Diaphorina citri OX=121845 GN=LOC103509286 PE=3 SV=1	1	7	5	5	46.6	26.189	11178000	11405000	10987000	11190000	8437900	7427800	8611400	8.15903e+06	1.37149	0.00145355
A0A3Q0IXS9	2-hydroxyacylsphingosine 1-beta-galactosyltransferase-like	LOC103509448		tr|A0A3Q0IXS9|A0A3Q0IXS9_DIACI	tr|A0A3Q0IXS9|A0A3Q0IXS9_DIACI 2-hydroxyacylsphingosine 1-beta-galactosyltransferase-like OS=Diaphorina citri OX=121845 GN=LOC103509448 PE=4 SV=1	1	2	2	2	4	60.268	41260	32698	35837	36598.3	48324	47819	55581	50574.7	0.72365	0.0168655
A0A3Q0IXU2	Phosphotransferase	LOC103509493		tr|A0A3Q0IXU2|A0A3Q0IXU2_DIACI;tr|A0A1S4EH37|A0A1S4EH37_DIACI	tr|A0A3Q0IXU2|A0A3Q0IXU2_DIACI Phosphotransferase OS=Diaphorina citri OX=121845 GN=LOC103509493 PE=3 SV=1	2	12	12	9	35.7	49.277	3662400	3137700	3226300	3.34213e+06	1484700	2118200	2108000	1.90363e+06	1.75566	0.00557998
A0A3Q0IY18	V-type proton ATPase subunit a	LOC103509452	FUNCTION: Essential component of the vacuolar proton pump (V-ATPase), a multimeric enzyme that catalyzes the translocation of protons across the membranes. Required for assembly and activity of the V-ATPase. {ECO:0000256|RuleBase:RU361189}.	tr|A0A3Q0IY18|A0A3Q0IY18_DIACI;tr|A0A1S4EFW5|A0A1S4EFW5_DIACI	tr|A0A3Q0IY18|A0A3Q0IY18_DIACI V-type proton ATPase subunit a OS=Diaphorina citri OX=121845 GN=LOC103509452 PE=3 SV=1	2	9	3	3	29.2	58.367	321510	269480	296350	295780	222460	246370	242980	237270	1.2466	0.0251794
A0A3Q0IY23	Alpha-tocopherol transfer protein	LOC103509087		tr|A0A3Q0IY23|A0A3Q0IY23_DIACI	tr|A0A3Q0IY23|A0A3Q0IY23_DIACI Alpha-tocopherol transfer protein OS=Diaphorina citri OX=121845 GN=LOC103509087 PE=4 SV=1	1	8	8	8	35.8	36.595	328490	253400	288820	290237	178720	220130	183260	194037	1.49578	0.019173
A0A3Q0IY39	Actin-interacting protein 1 isoform X1	LOC103511660		tr|A0A3Q0IY39|A0A3Q0IY39_DIACI;tr|A0A3Q0J2I3|A0A3Q0J2I3_DIACI;tr|A0A3Q0JL00|A0A3Q0JL00_DIACI;tr|A0A3Q0JL40|A0A3Q0JL40_DIACI	tr|A0A3Q0IY39|A0A3Q0IY39_DIACI Actin-interacting protein 1 isoform X1 OS=Diaphorina citri OX=121845 GN=LOC103511660 PE=4 SV=1;tr|A0A3Q0J2I3|A0A3Q0J2I3_DIACI Actin-interacting protein 1 isoform X3 OS=Diaphorina citri OX=121845 GN=LOC103511660 PE=4 SV=1;tr|A	4	21	21	21	58.7	65.441	3607300	4021900	3912900	3.84737e+06	4682300	4400900	4464600	4.51593e+06	0.851954	0.0113185
A0A3Q0IYB8	Uncharacterized protein LOC103511713	LOC103511713		tr|A0A3Q0IYB8|A0A3Q0IYB8_DIACI;tr|Q0PWT9|Q0PWT9_DIACI	tr|A0A3Q0IYB8|A0A3Q0IYB8_DIACI Uncharacterized protein LOC103511713 OS=Diaphorina citri OX=121845 GN=LOC103511713 PE=4 SV=1	2	18	18	18	54.7	63.261	6562800	5626400	6385900	6191700	7789100	8667500	9224800	8.56047e+06	0.72329	0.00950864
A0A3Q0IYY6	ATP-dependent RNA helicase	LOC103512058		tr|A0A3Q0IYY6|A0A3Q0IYY6_DIACI;tr|A0A1S3DUJ0|A0A1S3DUJ0_DIACI;tr|A0A1S4ERV3|A0A1S4ERV3_DIACI	tr|A0A3Q0IYY6|A0A3Q0IYY6_DIACI ATP-dependent RNA helicase OS=Diaphorina citri OX=121845 GN=LOC103512058 PE=3 SV=1	3	5	5	5	10.2	73.32	2210200	1669100	2073800	1.98437e+06	940280	1083200	1035300	1.01959e+06	1.94623	0.0045384
A0A3Q0IZR5	Aspartate, glycine, lysine and serine-rich protein	LOC103512488		tr|A0A3Q0IZR5|A0A3Q0IZR5_DIACI	tr|A0A3Q0IZR5|A0A3Q0IZR5_DIACI Aspartate, glycine, lysine and serine-rich protein OS=Diaphorina citri OX=121845 GN=LOC103512488 PE=4 SV=1	1	4	4	4	12.1	69.171	86635	135670	94778	105694	246450	194460	173550	204820	0.516035	0.0199996
A0A3Q0IZX0	Plexin A3-like	LOC103512566		tr|A0A3Q0IZX0|A0A3Q0IZX0_DIACI	tr|A0A3Q0IZX0|A0A3Q0IZX0_DIACI Plexin A3-like OS=Diaphorina citri OX=121845 GN=LOC103512566 PE=3 SV=1	1	5	2	2	3.7	214.4	218020	196470	252400	222297	140810	134060	89391	121420	1.8308	0.0116873
A0A3Q0J0M0	Lambda-crystallin homolog isoform X3	LOC103512794		tr|A0A3Q0J0M0|A0A3Q0J0M0_DIACI;tr|A0A3Q0J0H9|A0A3Q0J0H9_DIACI;tr|A0A3Q0JP88|A0A3Q0JP88_DIACI;tr|A0A1S3DTM9|A0A1S3DTM9_DIACI	tr|A0A3Q0J0M0|A0A3Q0J0M0_DIACI Lambda-crystallin homolog isoform X3 OS=Diaphorina citri OX=121845 GN=LOC103512794 PE=3 SV=1;tr|A0A3Q0J0H9|A0A3Q0J0H9_DIACI Lambda-crystallin homolog isoform X1 OS=Diaphorina citri OX=121845 GN=LOC103512794 PE=3 SV=1;tr|A0A3Q	4	7	7	7	56.2	26.601	360500	363400	356170	360023	496810	470090	456910	474603	0.758577	0.000655585
A0A3Q0J1D3	receptor protein-tyrosine kinase	LOC103513240		tr|A0A3Q0J1D3|A0A3Q0J1D3_DIACI	tr|A0A3Q0J1D3|A0A3Q0J1D3_DIACI receptor protein-tyrosine kinase OS=Diaphorina citri OX=121845 GN=LOC103513240 PE=4 SV=1	1	2	2	2	2.7	116.25	35237		34960	35098.5		62875	52523	57699	0.608303	0.048687
A0A3Q0J1F0	oxoglutarate dehydrogenase (succinyl-transferring)	LOC103513217		tr|A0A3Q0J1F0|A0A3Q0J1F0_DIACI;tr|A0A1S4EP03|A0A1S4EP03_DIACI	tr|A0A3Q0J1F0|A0A3Q0J1F0_DIACI oxoglutarate dehydrogenase (succinyl-transferring) OS=Diaphorina citri OX=121845 GN=LOC103513217 PE=3 SV=1	2	29	29	20	39.6	113.26	17613000	16126000	15459000	1.63993e+07	11434000	12135000	13903000	1.24907e+07	1.31293	0.0158523
A0A3Q0J1S9	Protein krasavietz-like	LOC103513448		tr|A0A3Q0J1S9|A0A3Q0J1S9_DIACI	tr|A0A3Q0J1S9|A0A3Q0J1S9_DIACI Protein krasavietz-like OS=Diaphorina citri OX=121845 GN=LOC103513448 PE=4 SV=1	1	5	5	1	25.1	26.28	309160	234740	285290	276397	154340	224390	193900	190877	1.44804	0.0458085
A0A3Q0J1U0	H/ACA ribonucleoprotein complex subunit 4	LOC103513443		tr|A0A3Q0J1U0|A0A3Q0J1U0_DIACI	tr|A0A3Q0J1U0|A0A3Q0J1U0_DIACI H/ACA ribonucleoprotein complex subunit 4 OS=Diaphorina citri OX=121845 GN=LOC103513443 PE=3 SV=1	1	6	6	6	18.4	55.404	643060	432960	559000	545007	202770	376660	276920	285450	1.90929	0.0305263
A0A3Q0J250	Beta-glucuronidase	LOC103513703	FUNCTION: Plays an important role in the degradation of dermatan and keratan sulfates. {ECO:0000256|RuleBase:RU361154}.	tr|A0A3Q0J250|A0A3Q0J250_DIACI;tr|A0A3Q0J288|A0A3Q0J288_DIACI	tr|A0A3Q0J250|A0A3Q0J250_DIACI Beta-glucuronidase OS=Diaphorina citri OX=121845 GN=LOC103513703 PE=3 SV=1	2	11	11	7	32.7	70.6	349490	426500	332830	369607	573440	545260	712120	610273	0.605641	0.0151875
A0A3Q0J2J8	Tubulin alpha chain	LOC103513788	FUNCTION: Tubulin is the major constituent of microtubules. It binds two moles of GTP, one at an exchangeable site on the beta chain and one at a non-exchangeable site on the alpha chain. {ECO:0000256|RuleBase:RU000352, ECO:0000256|SAAS:SAAS00392176}.	tr|A0A3Q0J2J8|A0A3Q0J2J8_DIACI;tr|A0A1S3D8W0|A0A1S3D8W0_DIACI	tr|A0A3Q0J2J8|A0A3Q0J2J8_DIACI Tubulin alpha chain OS=Diaphorina citri OX=121845 GN=LOC103513788 PE=3 SV=1;tr|A0A1S3D8W0|A0A1S3D8W0_DIACI Tubulin alpha chain OS=Diaphorina citri OX=121845 GN=LOC103513790 PE=3 SV=2	2	24	11	5	73.7	46.14	32103000	25291000	25710000	2.77013e+07	19332000	18962000	21430000	19908000	1.39147	0.0288719
A0A3Q0J353	Importin subunit beta-like	LOC103514066		tr|A0A3Q0J353|A0A3Q0J353_DIACI	tr|A0A3Q0J353|A0A3Q0J353_DIACI Importin subunit beta-like OS=Diaphorina citri OX=121845 GN=LOC103514066 PE=4 SV=1	1	13	13	13	33.3	71.842	773010	627720	727350	709360	408050	492540	501550	467380	1.51774	0.00977801
A0A3Q0J367	Xaa-Pro aminopeptidase 3-like	LOC103514082		tr|A0A3Q0J367|A0A3Q0J367_DIACI	tr|A0A3Q0J367|A0A3Q0J367_DIACI Xaa-Pro aminopeptidase 3-like OS=Diaphorina citri OX=121845 GN=LOC103514082 PE=4 SV=1	1	1	1	1	1.4	57.385	388510	422540	404960	405337	259110	261710	277840	266220	1.52256	0.000262367
A0A3Q0J376	Uncharacterized protein LOC103513983	LOC103513983		tr|A0A3Q0J376|A0A3Q0J376_DIACI	tr|A0A3Q0J376|A0A3Q0J376_DIACI Uncharacterized protein LOC103513983 OS=Diaphorina citri OX=121845 GN=LOC103513983 PE=4 SV=1	1	6	4	4	8.2	92.29	546870	390390	382170	439810	854810	964540	637260	818870	0.537094	0.0262181
A0A3Q0J3B7	ATP synthase subunit f, mitochondrial	LOC103511755		tr|A0A3Q0J3B7|A0A3Q0J3B7_DIACI	tr|A0A3Q0J3B7|A0A3Q0J3B7_DIACI ATP synthase subunit f, mitochondrial OS=Diaphorina citri OX=121845 GN=LOC103511755 PE=3 SV=1	1	5	5	5	68.2	12.517	16022000	12489000	12120000	1.35437e+07	8851500	9052800	10072000	9.32543e+06	1.45234	0.031519
A0A3Q0J448	Protein transport protein SEC23	LOC103514510	FUNCTION: Component of the coat protein complex II (COPII) which promotes the formation of transport vesicles from the endoplasmic reticulum (ER). The coat has two main functions, the physical deformation of the endoplasmic reticulum membrane into vesicles and the selection of cargo molecules. {ECO:0000256|RuleBase:RU365030}.	tr|A0A3Q0J448|A0A3Q0J448_DIACI	tr|A0A3Q0J448|A0A3Q0J448_DIACI Protein transport protein SEC23 OS=Diaphorina citri OX=121845 GN=LOC103514510 PE=3 SV=1	1	4	1	1	13.3	83.242	95494	95163	99735	96797.3	73438	71267	73635	72780	1.33	0.000131398
A0A3Q0J522	UV radiation resistance associated protein	LOC103514961		tr|A0A3Q0J522|A0A3Q0J522_DIACI	tr|A0A3Q0J522|A0A3Q0J522_DIACI UV radiation resistance associated protein OS=Diaphorina citri OX=121845 GN=LOC103514961 PE=4 SV=1	1	1	1	1	3.9	61.541	331310		269550	300430	199030	197170	195440	197213	1.52338	0.0207759
A0A3Q0J5N4	Eukaryotic translation initiation factor 4 gamma 2 isoform X1	LOC103515146		tr|A0A3Q0J5N4|A0A3Q0J5N4_DIACI;tr|A0A1S3DRW9|A0A1S3DRW9_DIACI	tr|A0A3Q0J5N4|A0A3Q0J5N4_DIACI Eukaryotic translation initiation factor 4 gamma 2 isoform X1 OS=Diaphorina citri OX=121845 GN=LOC103515146 PE=3 SV=1;tr|A0A1S3DRW9|A0A1S3DRW9_DIACI Myb-like protein M OS=Diaphorina citri OX=121845 GN=LOC103522787 PE=4 SV=1	2	4	4	4	6.1	87.419	108170	137100	126960	124077	56089	83461	77454	72334.7	1.71531	0.0120585
A0A3Q0J604	Piwi-like protein Siwi	LOC103513051		tr|A0A3Q0J604|A0A3Q0J604_DIACI	tr|A0A3Q0J604|A0A3Q0J604_DIACI Piwi-like protein Siwi OS=Diaphorina citri OX=121845 GN=LOC103513051 PE=3 SV=1	1	22	22	20	52.5	69.914	2741600	2419300	2492900	2.55127e+06	1548600	2038700	1898400	1.82857e+06	1.39523	0.0145919
A0A3Q0J609	Piwi-like protein Siwi isoform X1	LOC113468989		tr|A0A3Q0J609|A0A3Q0J609_DIACI	tr|A0A3Q0J609|A0A3Q0J609_DIACI Piwi-like protein Siwi isoform X1 OS=Diaphorina citri OX=121845 GN=LOC113468989 PE=4 SV=1	1	8	6	6	84.6	18.564	1773400	1772800	1969400	1.83853e+06	975780	1337100	1285800	1199560	1.53267	0.00805679
A0A3Q0J698	NADH dehydrogenase [ubiquinone] 1 beta subcomplex subunit 10	LOC108253180		tr|A0A3Q0J698|A0A3Q0J698_DIACI	tr|A0A3Q0J698|A0A3Q0J698_DIACI NADH dehydrogenase [ubiquinone] 1 beta subcomplex subunit 10 OS=Diaphorina citri OX=121845 GN=LOC108253180 PE=3 SV=1	1	12	12	10	77.9	16.209	6955400	5467400	5388000	5.93693e+06	3927300	4332400	3746600	4002100	1.48345	0.0228823
A0A3Q0J6G0	beta-ketoacyl-[acyl-carrier-protein] synthase I	LOC103513580		tr|A0A3Q0J6G0|A0A3Q0J6G0_DIACI	tr|A0A3Q0J6G0|A0A3Q0J6G0_DIACI beta-ketoacyl-[acyl-carrier-protein] synthase I OS=Diaphorina citri OX=121845 GN=LOC103513580 PE=3 SV=1	1	4	4	4	21.4	39.823		48994	33959	41476.5	66150	83848	70977	73658.3	0.563093	0.0355832
A0A3Q0J6G7	AP-1 complex subunit gamma-1-like	LOC103515619		tr|A0A3Q0J6G7|A0A3Q0J6G7_DIACI	tr|A0A3Q0J6G7|A0A3Q0J6G7_DIACI AP-1 complex subunit gamma-1-like OS=Diaphorina citri OX=121845 GN=LOC103515619 PE=4 SV=1	1	2	2	2	4.2	59.435	44414	33217	35621	37750.7	24099	24655	20647	23133.7	1.63185	0.0157291
A0A3Q0J6M8	alanine transaminase	LOC103513332		tr|A0A3Q0J6M8|A0A3Q0J6M8_DIACI;tr|A0A3Q0J1N0|A0A3Q0J1N0_DIACI	tr|A0A3Q0J6M8|A0A3Q0J6M8_DIACI alanine transaminase OS=Diaphorina citri OX=121845 GN=LOC103513332 PE=3 SV=1	2	22	22	22	59.3	56.264	29179000	22815000	23622000	2.52053e+07	15906000	14592000	16959000	15819000	1.59336	0.01134
A0A3Q0J6W1	Phosphate carrier protein, mitochondrial-like isoform X1	LOC103515833		tr|A0A3Q0J6W1|A0A3Q0J6W1_DIACI	tr|A0A3Q0J6W1|A0A3Q0J6W1_DIACI Phosphate carrier protein, mitochondrial-like isoform X1 OS=Diaphorina citri OX=121845 GN=LOC103515833 PE=3 SV=1	1	3	3	3	10	36.656	71041	82287	91793	81707	62836	64837	56507	61393.3	1.33088	0.0353796
A0A3Q0J7F2	Probable serine carboxypeptidase CPVL	LOC103516105		tr|A0A3Q0J7F2|A0A3Q0J7F2_DIACI	tr|A0A3Q0J7F2|A0A3Q0J7F2_DIACI Probable serine carboxypeptidase CPVL OS=Diaphorina citri OX=121845 GN=LOC103516105 PE=3 SV=1	1	5	5	5	20.8	33.207	245910	217560	304290	255920	131960	128030	150950	136980	1.8683	0.0109125
A0A3Q0J7U8	Proline dehydrogenase	LOC103516289	FUNCTION: Converts proline to delta-1-pyrroline-5-carboxylate. {ECO:0000256|RuleBase:RU364054}.	tr|A0A3Q0J7U8|A0A3Q0J7U8_DIACI	tr|A0A3Q0J7U8|A0A3Q0J7U8_DIACI Proline dehydrogenase OS=Diaphorina citri OX=121845 GN=LOC103516289 PE=3 SV=1	1	26	26	26	51.7	68.655	23744000	18498000	18049000	20097000	11364000	12908000	14930000	1.30673e+07	1.53796	0.0286161
A0A3Q0J806	ATP-dependent RNA helicase WM6	LOC103514355		tr|A0A3Q0J806|A0A3Q0J806_DIACI;tr|A0A3Q0J2Y4|A0A3Q0J2Y4_DIACI	tr|A0A3Q0J806|A0A3Q0J806_DIACI ATP-dependent RNA helicase WM6 OS=Diaphorina citri OX=121845 GN=LOC103514355 PE=4 SV=1	2	8	8	8	20.1	69.031	640990	502280	552420	565230	305340	437710	399510	380853	1.48411	0.0309739
A0A3Q0J847	RNA-binding protein 14-like	LOC103514029		tr|A0A3Q0J847|A0A3Q0J847_DIACI;tr|A0A1S3DAU1|A0A1S3DAU1_DIACI	tr|A0A3Q0J847|A0A3Q0J847_DIACI RNA-binding protein 14-like OS=Diaphorina citri OX=121845 GN=LOC103514029 PE=4 SV=1;tr|A0A1S3DAU1|A0A1S3DAU1_DIACI Cuticle protein 65-like OS=Diaphorina citri OX=121845 GN=LOC103514026 PE=4 SV=1	2	4	2	1	21.3	57.268	2102800	2209700	1531400	1.94797e+06	2869000	4137500	3631700	3.54607e+06	0.549332	0.0197056
A0A3Q0J867	Importin-7-like	LOC103516477		tr|A0A3Q0J867|A0A3Q0J867_DIACI;tr|A0A3Q0J898|A0A3Q0J898_DIACI	tr|A0A3Q0J867|A0A3Q0J867_DIACI Importin-7-like OS=Diaphorina citri OX=121845 GN=LOC103516477 PE=4 SV=1	2	7	7	5	16.6	79.776	329260	278070	320650	309327	170580	244840	195700	203707	1.51849	0.0172486
A0A3Q0J8Q5	glutamine--tRNA ligase	LOC103516686		tr|A0A3Q0J8Q5|A0A3Q0J8Q5_DIACI	tr|A0A3Q0J8Q5|A0A3Q0J8Q5_DIACI glutamine--tRNA ligase OS=Diaphorina citri OX=121845 GN=LOC103516686 PE=3 SV=1	1	7	7	7	14.8	88.08	209990	212840	213450	212093	120810	151220	160830	144287	1.46994	0.00499274
A0A3Q0J8X7	60S ribosomal protein L22-like	LOC103516826		tr|A0A3Q0J8X7|A0A3Q0J8X7_DIACI	tr|A0A3Q0J8X7|A0A3Q0J8X7_DIACI 60S ribosomal protein L22-like OS=Diaphorina citri OX=121845 GN=LOC103516826 PE=3 SV=1	1	3	3	3	41.3	10.955	1577000	1058600	1300100	1311900	734680	965750	858400	852943	1.53809	0.048861
A0A3Q0J968	Delta-1-pyrroline-5-carboxylate dehydrogenase, mitochondrial	LOC103514504		tr|A0A3Q0J968|A0A3Q0J968_DIACI;tr|A0A3Q0JKN3|A0A3Q0JKN3_DIACI	tr|A0A3Q0J968|A0A3Q0J968_DIACI Delta-1-pyrroline-5-carboxylate dehydrogenase, mitochondrial OS=Diaphorina citri OX=121845 GN=LOC103514504 PE=3 SV=1	2	16	16	16	37.2	59.729	25953000	17897000	17511000	2.04537e+07	12134000	10726000	12961000	1.19403e+07	1.71299	0.0395442
A0A3Q0J999	MICOS complex subunit MIC60	LOC103516929	FUNCTION: Component of the MICOS complex, a large protein complex of the mitochondrial inner membrane that plays crucial roles in the maintenance of crista junctions, inner membrane architecture, and formation of contact sites to the outer membrane. {ECO:0000256|RuleBase:RU363000}.	tr|A0A3Q0J999|A0A3Q0J999_DIACI	tr|A0A3Q0J999|A0A3Q0J999_DIACI MICOS complex subunit MIC60 OS=Diaphorina citri OX=121845 GN=LOC103516929 PE=3 SV=1	1	21	21	21	63.7	45.404	5076400	3984500	3991800	4350900	3239000	2929700	3288000	3.15223e+06	1.38026	0.0342868
A0A3Q0J9A0	Phospholipase A-2-activating protein	LOC103514884		tr|A0A3Q0J9A0|A0A3Q0J9A0_DIACI;tr|A0A3Q0J869|A0A3Q0J869_DIACI	tr|A0A3Q0J9A0|A0A3Q0J9A0_DIACI Phospholipase A-2-activating protein OS=Diaphorina citri OX=121845 GN=LOC103514884 PE=3 SV=1;tr|A0A3Q0J869|A0A3Q0J869_DIACI Phospholipase A-2-activating protein-like OS=Diaphorina citri OX=121845 GN=LOC113470421 PE=4 SV=1	2	8	8	2	21.2	72.162	332960	277750	274230	294980	154890	205760	232340	197663	1.49234	0.0303739
A0A3Q0J9A7	Carboxylic ester hydrolase	LOC103517030		tr|A0A3Q0J9A7|A0A3Q0J9A7_DIACI;tr|A0A3Q0J9K2|A0A3Q0J9K2_DIACI	tr|A0A3Q0J9A7|A0A3Q0J9A7_DIACI Carboxylic ester hydrolase OS=Diaphorina citri OX=121845 GN=LOC103517030 PE=3 SV=1	2	28	28	28	63.5	61.861	13669000	9602100	13864000	1.23784e+07	24393000	25393000	23724000	2.45033e+07	0.505171	0.00118295
A0A3Q0J9Q9	LOW QUALITY PROTEIN: homeobox protein 2-like	LOC108253070		tr|A0A3Q0J9Q9|A0A3Q0J9Q9_DIACI	tr|A0A3Q0J9Q9|A0A3Q0J9Q9_DIACI LOW QUALITY PROTEIN: homeobox protein 2-like OS=Diaphorina citri OX=121845 GN=LOC108253070 PE=4 SV=1	1	10	9	6	15.8	134.46	1484900	3154700	1609300	2.08297e+06	4491000	4483900	3155000	4043300	0.515165	0.0481795
A0A3Q0J9T5	Eukaryotic translation initiation factor 3 subunit E	LOC103514804	FUNCTION: Component of the eukaryotic translation initiation factor 3 (eIF-3) complex, which is involved in protein synthesis of a specialized repertoire of mRNAs and, together with other initiation factors, stimulates binding of mRNA and methionyl-tRNAi to the 40S ribosome. The eIF-3 complex specifically targets and initiates translation of a subset of mRNAs involved in cell proliferation. {ECO:…	tr|A0A3Q0J9T5|A0A3Q0J9T5_DIACI;tr|A0A1S3DPP2|A0A1S3DPP2_DIACI	tr|A0A3Q0J9T5|A0A3Q0J9T5_DIACI Eukaryotic translation initiation factor 3 subunit E OS=Diaphorina citri OX=121845 GN=LOC103514804 PE=3 SV=1	2	10	10	10	47	44.876	827380	600100	659020	695500	431120	525000	402800	452973	1.53541	0.0351615
A0A3Q0JA89	Small ribosomal subunit protein eS1	LOC103515015		tr|A0A3Q0JA89|A0A3Q0JA89_DIACI;tr|A0A3Q0J564|A0A3Q0J564_DIACI	tr|A0A3Q0JA89|A0A3Q0JA89_DIACI Small ribosomal subunit protein eS1 OS=Diaphorina citri OX=121845 GN=LOC103515015 PE=3 SV=1;tr|A0A3Q0J564|A0A3Q0J564_DIACI Small ribosomal subunit protein eS1 OS=Diaphorina citri OX=121845 GN=LOC103515015 PE=3 SV=1	2	8	8	8	31.8	31.401	4354500	3007800	3673100	3.67847e+06	2368900	2704700	2166700	2.41343e+06	1.52416	0.03926
A0A3Q0JAB1	NADPH--cytochrome P450 reductase-like	LOC108253113		tr|A0A3Q0JAB1|A0A3Q0JAB1_DIACI;tr|A0A3Q0J586|A0A3Q0J586_DIACI	tr|A0A3Q0JAB1|A0A3Q0JAB1_DIACI NADPH--cytochrome P450 reductase-like OS=Diaphorina citri OX=121845 GN=LOC108253113 PE=4 SV=1;tr|A0A3Q0J586|A0A3Q0J586_DIACI NADPH--cytochrome P450 reductase-like OS=Diaphorina citri OX=121845 GN=LOC113469866 PE=4 SV=1	2	3	3	3	31	20.675	443120	489190	451520	461277	224420	329150	335740	296437	1.55607	0.0131068
A0A3Q0JAH3	Acetyl-CoA hydrolase	LOC103517594		tr|A0A3Q0JAH3|A0A3Q0JAH3_DIACI	tr|A0A3Q0JAH3|A0A3Q0JAH3_DIACI Acetyl-CoA hydrolase OS=Diaphorina citri OX=121845 GN=LOC103517594 PE=3 SV=1	1	2	2	2	6.1	48.704	113630	74327	108030	98662.3	58082	67162	47812	57685.3	1.71035	0.0384701
A0A3Q0JAS4	Intersectin-1	LOC113470995		tr|A0A3Q0JAS4|A0A3Q0JAS4_DIACI	tr|A0A3Q0JAS4|A0A3Q0JAS4_DIACI Intersectin-1 OS=Diaphorina citri OX=121845 GN=LOC113470995 PE=4 SV=1	1	3	2	2	14.2	34.947	30760	31733	30460	30984.3	38706	41606	38104	39472	0.78497	0.00178067
A0A3Q0JB80	Hillarin isoform X1	LOC103517985		tr|A0A3Q0JB80|A0A3Q0JB80_DIACI;tr|A0A3Q0JFA0|A0A3Q0JFA0_DIACI;tr|A0A3Q0JD43|A0A3Q0JD43_DIACI	tr|A0A3Q0JB80|A0A3Q0JB80_DIACI Hillarin isoform X1 OS=Diaphorina citri OX=121845 GN=LOC103517985 PE=4 SV=1;tr|A0A3Q0JFA0|A0A3Q0JFA0_DIACI Hillarin isoform X4 OS=Diaphorina citri OX=121845 GN=LOC103517985 PE=4 SV=1	3	11	11	11	41.5	47.035	374610	461900	447080	427863	223320	309960	345650	292977	1.4604	0.040669
A0A3Q0JB91	Nucleosome assembly protein 1-like 1	LOC103518088		tr|A0A3Q0JB91|A0A3Q0JB91_DIACI	tr|A0A3Q0JB91|A0A3Q0JB91_DIACI Nucleosome assembly protein 1-like 1 OS=Diaphorina citri OX=121845 GN=LOC103518088 PE=3 SV=1	1	6	6	6	18	54.59	539440	397290	465220	467317	291550	344900	281330	305927	1.52754	0.0239203
A0A3Q0JBG5	Carbonic anhydrase 4-like	LOC103518085		tr|A0A3Q0JBG5|A0A3Q0JBG5_DIACI	tr|A0A3Q0JBG5|A0A3Q0JBG5_DIACI Carbonic anhydrase 4-like OS=Diaphorina citri OX=121845 GN=LOC103518085 PE=3 SV=1	1	4	4	4	25.2	34.014	115610	104950	187570	136043	221030	224780	317280	254363	0.534839	0.044094
A0A3Q0JBN2	Eukaryotic translation initiation factor 3 subunit L	LOC103516035		tr|A0A3Q0JBN2|A0A3Q0JBN2_DIACI	tr|A0A3Q0JBN2|A0A3Q0JBN2_DIACI Eukaryotic translation initiation factor 3 subunit L OS=Diaphorina citri OX=121845 GN=LOC103516035 PE=4 SV=1	1	8	8	7	22.4	58.229	538960	411760	458590	469770	228760	334500	314560	292607	1.60547	0.0229085
A0A3Q0JBZ0	Uncharacterized protein LOC103515871	LOC103515871		tr|A0A3Q0JBZ0|A0A3Q0JBZ0_DIACI	tr|A0A3Q0JBZ0|A0A3Q0JBZ0_DIACI Uncharacterized protein LOC103515871 OS=Diaphorina citri OX=121845 GN=LOC103515871 PE=3 SV=1	1	5	5	5	20.3	62.005	170590	146610	142230	153143	107250	109360	96899	104503	1.46544	0.00719669
A0A3Q0JC24	Neither inactivation nor afterpotential protein C-like	LOC103518375		tr|A0A3Q0JC24|A0A3Q0JC24_DIACI	tr|A0A3Q0JC24|A0A3Q0JC24_DIACI Neither inactivation nor afterpotential protein C-like OS=Diaphorina citri OX=121845 GN=LOC103518375 PE=3 SV=1	1	8	8	8	10.9	115.03	287900	303590	280260	290583	194860	240280	259540	231560	1.25489	0.0442036
A0A3Q0JCB0	Cytochrome P450 714A2-like	LOC113470261		tr|A0A3Q0JCB0|A0A3Q0JCB0_DIACI	tr|A0A3Q0JCB0|A0A3Q0JCB0_DIACI Cytochrome P450 714A2-like OS=Diaphorina citri OX=121845 GN=LOC113470261 PE=3 SV=1	1	1	1	1	5.5	39.302	140380	112030	113510	121973	72884	80741	67145	73590	1.65747	0.00847125
A0A3Q0JCF3	Galactokinase-like	LOC103516117		tr|A0A3Q0JCF3|A0A3Q0JCF3_DIACI;tr|A0A1S4EBD4|A0A1S4EBD4_DIACI	tr|A0A3Q0JCF3|A0A3Q0JCF3_DIACI Galactokinase-like OS=Diaphorina citri OX=121845 GN=LOC103516117 PE=4 SV=1	2	9	9	9	47.5	39.386	1078500	1042100	1060200	1.06027e+06	2040000	2069100	2041800	2050300	0.517128	2.47095e-07
A0A3Q0JCG5	3-hydroxyisobutyryl-CoA hydrolase, mitochondrial	LOC103516123	FUNCTION: Hydrolyzes 3-hydroxyisobutyryl-CoA (HIBYL-CoA), a saline catabolite. {ECO:0000256|RuleBase:RU363052}.	tr|A0A3Q0JCG5|A0A3Q0JCG5_DIACI	tr|A0A3Q0JCG5|A0A3Q0JCG5_DIACI 3-hydroxyisobutyryl-CoA hydrolase, mitochondrial OS=Diaphorina citri OX=121845 GN=LOC103516123 PE=4 SV=1	1	4	4	3	25.9	27.208	321270	221360	244450	262360	151930	177040	182070	170347	1.54015	0.0436223
A0A3Q0JCW1	60S ribosomal protein L21	LOC103518873		tr|A0A3Q0JCW1|A0A3Q0JCW1_DIACI;tr|A0A3Q0JI10|A0A3Q0JI10_DIACI	tr|A0A3Q0JCW1|A0A3Q0JCW1_DIACI 60S ribosomal protein L21 OS=Diaphorina citri OX=121845 GN=LOC103518873 PE=3 SV=1	2	14	14	6	14.6	195.14	1782600	1284100	1694500	1.58707e+06	1001600	1201800	1053200	1.08553e+06	1.46202	0.0383552
A0A3Q0JD10	Malic enzyme	LOC103519081		tr|A0A3Q0JD10|A0A3Q0JD10_DIACI	tr|A0A3Q0JD10|A0A3Q0JD10_DIACI Malic enzyme OS=Diaphorina citri OX=121845 GN=LOC103519081 PE=3 SV=1	1	16	14	14	60.3	34.821	14266000	15932000	15379000	1.51923e+07	7797400	9078300	9698200	8.85797e+06	1.7151	0.00104292
A0A3Q0JD50	Delta(24)-sterol reductase-like	LOC103518884		tr|A0A3Q0JD50|A0A3Q0JD50_DIACI	tr|A0A3Q0JD50|A0A3Q0JD50_DIACI Delta(24)-sterol reductase-like OS=Diaphorina citri OX=121845 GN=LOC103518884 PE=4 SV=1	1	4	4	4	10.5	53.826	218680	222400	234990	225357	168500	170770	134700	157990	1.4264	0.00600823
A0A3Q0JE49	Coatomer subunit alpha-like	LOC103519490		tr|A0A3Q0JE49|A0A3Q0JE49_DIACI	tr|A0A3Q0JE49|A0A3Q0JE49_DIACI Coatomer subunit alpha-like OS=Diaphorina citri OX=121845 GN=LOC103519490 PE=4 SV=1	1	12	3	3	33.4	70.648	260420	175690	234520	223543	126760	140420	152730	139970	1.59708	0.0330893
A0A3Q0JEB8	Opsin Rh4-like	LOC103517454		tr|A0A3Q0JEB8|A0A3Q0JEB8_DIACI;tr|A0A859N796|A0A859N796_DIACI	tr|A0A3Q0JEB8|A0A3Q0JEB8_DIACI Opsin Rh4-like OS=Diaphorina citri OX=121845 GN=LOC103517454 PE=4 SV=1;tr|A0A859N796|A0A859N796_DIACI UV OS=Diaphorina citri OX=121845 PE=2 SV=1	2	1	1	1	9.6	18.542		16015	15106	15560.5		28083	25078	26580.5	0.58541	0.019693
A0A3Q0JEY1	Ornithine aminotransferase	LOC103519906		tr|A0A3Q0JEY1|A0A3Q0JEY1_DIACI	tr|A0A3Q0JEY1|A0A3Q0JEY1_DIACI Ornithine aminotransferase OS=Diaphorina citri OX=121845 GN=LOC103519906 PE=3 SV=1	1	12	12	12	89.4	23.434	4866800	3896300	4608100	4.45707e+06	3697600	3444000	2884200	3.34193e+06	1.33368	0.0415556
A0A3Q0JF19	Cytoplasmic aconitate hydratase-like	LOC108253550		tr|A0A3Q0JF19|A0A3Q0JF19_DIACI	tr|A0A3Q0JF19|A0A3Q0JF19_DIACI Cytoplasmic aconitate hydratase-like OS=Diaphorina citri OX=121845 GN=LOC108253550 PE=3 SV=1	1	16	16	8	45	63.302	2498400	2127900	2151000	2259100	1819000	1829400	1778700	1.80903e+06	1.24879	0.0203886
A0A3Q0JFN5	IQ domain-containing protein N	LOC103518168		tr|A0A3Q0JFN5|A0A3Q0JFN5_DIACI	tr|A0A3Q0JFN5|A0A3Q0JFN5_DIACI IQ domain-containing protein N OS=Diaphorina citri OX=121845 GN=LOC103518168 PE=4 SV=1	1	1	1	1	17.4	11.987	80956	74302	89703	81653.7	106590	118810	116730	114043	0.715988	0.00517803
A0A3Q0JFV7	Aminopeptidase N-like	LOC113472026		tr|A0A3Q0JFV7|A0A3Q0JFV7_DIACI	tr|A0A3Q0JFV7|A0A3Q0JFV7_DIACI Aminopeptidase N-like OS=Diaphorina citri OX=121845 GN=LOC113472026 PE=3 SV=1	1	11	6	6	43.2	42.859	2587100	3081200	3111500	2926600	4312900	4954400	5761400	5.00957e+06	0.584202	0.0099846
A0A3Q0JG87	Eukaryotic translation initiation factor 5	LOC103518523		tr|A0A3Q0JG87|A0A3Q0JG87_DIACI	tr|A0A3Q0JG87|A0A3Q0JG87_DIACI Eukaryotic translation initiation factor 5 OS=Diaphorina citri OX=121845 GN=LOC103518523 PE=3 SV=1	1	9	9	9	29.9	50.321	650390	506360	597220	584657	387980	441200	366480	398553	1.46695	0.0173423
A0A3Q0JLK0	UDP-glucuronosyltransferase	LOC103521101		tr|A0A3Q0JLK0|A0A3Q0JLK0_DIACI;tr|A0A3Q0JH20|A0A3Q0JH20_DIACI;tr|A0A3Q0J0X4|A0A3Q0J0X4_DIACI	tr|A0A3Q0JLK0|A0A3Q0JLK0_DIACI UDP-glucuronosyltransferase OS=Diaphorina citri OX=121845 GN=LOC103521101 PE=3 SV=1;tr|A0A3Q0JH20|A0A3Q0JH20_DIACI UDP-glucuronosyltransferase OS=Diaphorina citri OX=121845 GN=LOC103521101 PE=3 SV=1;tr|A0A3Q0J0X4|A0A3Q0J0X4_D	3	6	6	6	24	51.374	682950	435450	511450	543283	289000	288210	377690	318300	1.70683	0.0464828
A0A3Q0JHS8	Xanthine dehydrogenase 2-like	LOC103521524		tr|A0A3Q0JHS8|A0A3Q0JHS8_DIACI	tr|A0A3Q0JHS8|A0A3Q0JHS8_DIACI Xanthine dehydrogenase 2-like OS=Diaphorina citri OX=121845 GN=LOC103521524 PE=4 SV=1	1	19	19	19	57.7	63.96	1037400	1125100	965800	1.04277e+06	1511800	1611000	1410200	1511000	0.690117	0.00319934
A0A3Q0JIS9	Probable medium-chain specific acyl-CoA dehydrogenase, mitochondrial	LOC113471594		tr|A0A3Q0JIS9|A0A3Q0JIS9_DIACI	tr|A0A3Q0JIS9|A0A3Q0JIS9_DIACI Probable medium-chain specific acyl-CoA dehydrogenase, mitochondrial OS=Diaphorina citri OX=121845 GN=LOC113471594 PE=4 SV=1	1	2	2	2	16.5	14.168	1978500	1433500	1611700	1.67457e+06	1099300	774720	793610	889210	1.88321	0.0149296
A0A3Q0JJ94	Leucine-rich repeats and immunoglobulin-like domains protein 1	LOC103519591		tr|A0A3Q0JJ94|A0A3Q0JJ94_DIACI	tr|A0A3Q0JJ94|A0A3Q0JJ94_DIACI Leucine-rich repeats and immunoglobulin-like domains protein 1 OS=Diaphorina citri OX=121845 GN=LOC103519591 PE=4 SV=1	1	6	6	5	36.2	34.212	183930	191830	188780	188180	204710	254810	257570	239030	0.787265	0.042647
A0A3Q0JJP0	Uncharacterized protein LOC113473025	LOC113473025		tr|A0A3Q0JJP0|A0A3Q0JJP0_DIACI	tr|A0A3Q0JJP0|A0A3Q0JJP0_DIACI Uncharacterized protein LOC113473025 OS=Diaphorina citri OX=121845 GN=LOC113473025 PE=4 SV=1	1	2	1	1	15.1	11.904	154030	115180	169560	146257	103290	94943	84902	94378.3	1.54968	0.038122
A0A3Q0JJQ8	DnaJ homolog subfamily C member 3	LOC103520499		tr|A0A3Q0JJQ8|A0A3Q0JJQ8_DIACI	tr|A0A3Q0JJQ8|A0A3Q0JJQ8_DIACI DnaJ homolog subfamily C member 3 OS=Diaphorina citri OX=121845 GN=LOC103520499 PE=4 SV=1	1	6	6	3	12.5	78.383	37573	72635	110180	73462.7	124140	149380	145680	139733	0.525735	0.0415738
A0A3Q0JJV1	Muscle LIM protein Mlp84B-like	LOC103523001		tr|A0A3Q0JJV1|A0A3Q0JJV1_DIACI	tr|A0A3Q0JJV1|A0A3Q0JJV1_DIACI Muscle LIM protein Mlp84B-like OS=Diaphorina citri OX=121845 GN=LOC103523001 PE=4 SV=1	1	10	10	10	58.9	26.773	6187200	6817100	7052100	6.68547e+06	8867600	7870200	7872400	8203400	0.814963	0.0225887
A0A3Q0JK22	Importin subunit beta-1-like	LOC103520690		tr|A0A3Q0JK22|A0A3Q0JK22_DIACI	tr|A0A3Q0JK22|A0A3Q0JK22_DIACI Importin subunit beta-1-like OS=Diaphorina citri OX=121845 GN=LOC103520690 PE=4 SV=1	1	1	1	1	10.1	14.46		145900	139720	142810	83264	100710	105880	96618	1.47809	0.014893
A0A3Q0JK77	Cytosolic 10-formyltetrahydrofolate dehydrogenase	LOC103523378		tr|A0A3Q0JK77|A0A3Q0JK77_DIACI	tr|A0A3Q0JK77|A0A3Q0JK77_DIACI Cytosolic 10-formyltetrahydrofolate dehydrogenase OS=Diaphorina citri OX=121845 GN=LOC103523378 PE=3 SV=1	1	3	3	3	5.8	82.084	109950	83331	91613	94964.7	64014	53073	47748	54945	1.72836	0.0121919
A0A3Q0JKL2	Galactose-1-phosphate uridylyltransferase	LOC103520353		tr|A0A3Q0JKL2|A0A3Q0JKL2_DIACI	tr|A0A3Q0JKL2|A0A3Q0JKL2_DIACI Galactose-1-phosphate uridylyltransferase OS=Diaphorina citri OX=121845 GN=LOC103520353 PE=3 SV=1	1	13	13	12	52.2	33.855	1068500	917840	896820	961053	1203200	1253400	1223500	1226700	0.783446	0.00901055
A0A3Q0JL68	Uncharacterized protein LOC103520809	LOC103520809		tr|A0A3Q0JL68|A0A3Q0JL68_DIACI	tr|A0A3Q0JL68|A0A3Q0JL68_DIACI Uncharacterized protein LOC103520809 OS=Diaphorina citri OX=121845 GN=LOC103520809 PE=4 SV=1	1	4	4	4	20	35.225	1146800	2101100	1825900	1.69127e+06	2840400	2542900	3362700	2.91533e+06	0.580128	0.0300153
A0A3Q0JLA6	Uncharacterized protein LOC103524261	LOC103524261		tr|A0A3Q0JLA6|A0A3Q0JLA6_DIACI;tr|A0A1S3DV15|A0A1S3DV15_DIACI	tr|A0A3Q0JLA6|A0A3Q0JLA6_DIACI Uncharacterized protein LOC103524261 OS=Diaphorina citri OX=121845 GN=LOC103524261 PE=4 SV=1;tr|A0A1S3DV15|A0A1S3DV15_DIACI Uncharacterized protein LOC103524274 OS=Diaphorina citri OX=121845 GN=LOC103524274 PE=4 SV=1	2	6	6	6	41.3	24.402	2114000	2087700	1681300	1961000	3255200	2987800	3209400	3150800	0.622382	0.00185491
A0A3Q0JLB4	Complex I-49kD	LOC103524257		tr|A0A3Q0JLB4|A0A3Q0JLB4_DIACI	tr|A0A3Q0JLB4|A0A3Q0JLB4_DIACI Complex I-49kD OS=Diaphorina citri OX=121845 GN=LOC103524257 PE=3 SV=1	1	14	14	14	46.1	47.284	9963300	7648200	7859300	8.49027e+06	4238500	4992700	5335700	4.85563e+06	1.74854	0.0107887
A0A3Q0JLG5	Myosin heavy chain, muscle-like isoform X2	LOC103524328		tr|A0A3Q0JLG5|A0A3Q0JLG5_DIACI;tr|A0A3Q0JLG9|A0A3Q0JLG9_DIACI;tr|A0A1S3DTE0|A0A1S3DTE0_DIACI	tr|A0A3Q0JLG5|A0A3Q0JLG5_DIACI Myosin heavy chain, muscle-like isoform X2 OS=Diaphorina citri OX=121845 GN=LOC103524328 PE=3 SV=1;tr|A0A3Q0JLG9|A0A3Q0JLG9_DIACI Myosin heavy chain, muscle-like isoform X1 OS=Diaphorina citri OX=121845 GN=LOC103524328 PE=3 S	3	35	3	0	65.7	72.158	14872000	16077000	16255000	1.57347e+07	7383800	7830500	9316000	8.17677e+06	1.92431	0.000485682
A0A3Q0JLG8	Uncharacterized protein LOC113473903	LOC113473903		tr|A0A3Q0JLG8|A0A3Q0JLG8_DIACI	tr|A0A3Q0JLG8|A0A3Q0JLG8_DIACI Uncharacterized protein LOC113473903 OS=Diaphorina citri OX=121845 GN=LOC113473903 PE=4 SV=1	1	2	2	2	20.4	13.205	317710	770850	528150	538903	947010	981060	1187200	1.03842e+06	0.518963	0.0296462
A0A3Q0JLI2	Myosin heavy chain, muscle-like isoform X12	LOC103524328		tr|A0A3Q0JLI2|A0A3Q0JLI2_DIACI	tr|A0A3Q0JLI2|A0A3Q0JLI2_DIACI Myosin heavy chain, muscle-like isoform X12 OS=Diaphorina citri OX=121845 GN=LOC103524328 PE=3 SV=1	1	35	1	0	65.4	72.189	1710500	2017600	1790100	1839400	902190	1397700	1473800	1.2579e+06	1.46228	0.0447145
A0A3Q0JLM4	COP9 signalosome complex subunit 2	LOC103524349		tr|A0A3Q0JLM4|A0A3Q0JLM4_DIACI;tr|A0A3Q0JLQ3|A0A3Q0JLQ3_DIACI	tr|A0A3Q0JLM4|A0A3Q0JLM4_DIACI COP9 signalosome complex subunit 2 OS=Diaphorina citri OX=121845 GN=LOC103524349 PE=4 SV=1;tr|A0A3Q0JLQ3|A0A3Q0JLQ3_DIACI COP9 signalosome complex subunit 2-like OS=Diaphorina citri OX=121845 GN=LOC113473934 PE=4 SV=1	2	3	3	2	8.6	51.89	111450	87434	98041	98975	61775	72974	76305	70351.3	1.40687	0.0253172
A0A3Q0JPX9	NADH dehydrogenase [ubiquinone] 1 alpha subcomplex subunit 9, mitochondrial-like isoform X1	LOC103523602		tr|A0A3Q0JPX9|A0A3Q0JPX9_DIACI	tr|A0A3Q0JPX9|A0A3Q0JPX9_DIACI NADH dehydrogenase [ubiquinone] 1 alpha subcomplex subunit 9, mitochondrial-like isoform X1 OS=Diaphorina citri OX=121845 GN=LOC103523602 PE=4 SV=1	1	15	15	7	56.5	40.696	8219800	8423400	9286800	8.64333e+06	4437300	5527500	6073600	5.34613e+06	1.61674	0.0047762
A0A3Q0JR32	proline--tRNA ligase	LOC103524260		tr|A0A3Q0JR32|A0A3Q0JR32_DIACI	tr|A0A3Q0JR32|A0A3Q0JR32_DIACI proline--tRNA ligase OS=Diaphorina citri OX=121845 GN=LOC103524260 PE=4 SV=1	1	22	22	22	28.7	149.06	1045100	834440	866810	915450	601520	665340	658210	641690	1.42662	0.0162058
A0A3R5SMP1	ATP-binding cassette sub-family C member 3	ABCC3		tr|A0A3R5SMP1|A0A3R5SMP1_DIACI;tr|A0A6G5VBK1|A0A6G5VBK1_DIACI;tr|A0A3Q0J0E5|A0A3Q0J0E5_DIACI;tr|A0A3Q0JGJ0|A0A3Q0JGJ0_DIACI;tr|A0A3Q0JJX7|A0A3Q0JJX7_DIACI	tr|A0A3R5SMP1|A0A3R5SMP1_DIACI ATP-binding cassette sub-family C member 3 OS=Diaphorina citri OX=121845 GN=ABCC3 PE=2 SV=1;tr|A0A6G5VBK1|A0A6G5VBK1_DIACI ATP-binding cassette transporter OS=Diaphorina citri OX=121845 GN=ABCC5 PE=2 SV=1;tr|A0A3Q0J0E5|A0A3Q0	5	14	14	14	13.9	153.61	429050	399830	400930	409937	474410	575430	575990	541943	0.75642	0.0197504
A0A3R5VSI0	ATP-binding cassette sub-family G member 10	ABCG10		tr|A0A3R5VSI0|A0A3R5VSI0_DIACI;tr|A0A1S4ERS2|A0A1S4ERS2_DIACI;tr|A0A3Q0ITX9|A0A3Q0ITX9_DIACI	tr|A0A3R5VSI0|A0A3R5VSI0_DIACI ATP-binding cassette sub-family G member 10 OS=Diaphorina citri OX=121845 GN=ABCG10 PE=2 SV=1;tr|A0A1S4ERS2|A0A1S4ERS2_DIACI ABC transporter G family member 13-like OS=Diaphorina citri OX=121845 GN=LOC103524018 PE=3 SV=2;tr|A	3	4	4	4	5.5	101.08	76693	78689	82479	79287	66615	47225	42203	52014.3	1.52433	0.0233216
A0A7T3UZ07	Chemosensory protein 8	CSP8		tr|A0A7T3UZ07|A0A7T3UZ07_DIACI;tr|A0A1S4ELV4|A0A1S4ELV4_DIACI	tr|A0A7T3UZ07|A0A7T3UZ07_DIACI Chemosensory protein 8 OS=Diaphorina citri OX=121845 GN=CSP8 PE=2 SV=1;tr|A0A1S4ELV4|A0A1S4ELV4_DIACI Ejaculatory bulb-specific protein 3-like OS=Diaphorina citri OX=121845 GN=LOC108253528 PE=4 SV=1	2	6	6	6	43.4	15.448	2442100	2317400	1788200	2.18257e+06	1594700	1077400	1079600	1.25057e+06	1.74526	0.0242729
Q0PWV3	Putative ribosomal protein L3e (Fragment)			tr|Q0PWV3|Q0PWV3_DIACI	tr|Q0PWV3|Q0PWV3_DIACI Putative ribosomal protein L3e (Fragment) OS=Diaphorina citri OX=121845 PE=2 SV=1	1	4	2	2	25.9	22.357	1182100	969000	1190800	1.11397e+06	466510	812050	730040	669533	1.6638	0.0248988
Q0PWV7	40S ribosomal protein S3 (Fragment)			tr|Q0PWV7|Q0PWV7_DIACI;tr|A0A1S3D3J0|A0A1S3D3J0_DIACI	tr|Q0PWV7|Q0PWV7_DIACI 40S ribosomal protein S3 (Fragment) OS=Diaphorina citri OX=121845 PE=2 SV=1	2	10	10	10	54.5	24.153	4163700	4201500	4818300	4394500	3688900	3441100	3469600	3533200	1.24377	0.0189671
Q0PWV8	Ribosomal protein S4-like protein (Fragment)			tr|Q0PWV8|Q0PWV8_DIACI	tr|Q0PWV8|Q0PWV8_DIACI Ribosomal protein S4-like protein (Fragment) OS=Diaphorina citri OX=121845 PE=2 SV=1	1	4	4	4	33.7	11.361	1906400	1281300	1505400	1.56437e+06	912810	1063400	1025300	1.0005e+06	1.56358	0.0401903
Q0PWV9	Ribosomal protein S3a-like protein (Fragment)			tr|Q0PWV9|Q0PWV9_DIACI	tr|Q0PWV9|Q0PWV9_DIACI Ribosomal protein S3a-like protein (Fragment) OS=Diaphorina citri OX=121845 PE=2 SV=1	1	3	3	3	35.3	9.5119	1083500	1125400	1382500	1.19713e+06	756700	843410	840520	813543	1.47151	0.0171569
Q0PXV1	40S ribosomal protein S7	LOC103524175		tr|Q0PXV1|Q0PXV1_DIACI	tr|Q0PXV1|Q0PXV1_DIACI 40S ribosomal protein S7 OS=Diaphorina citri OX=121845 GN=LOC103524175 PE=2 SV=1	1	7	7	7	45.8	22.266	2712600	1921000	2221900	2.28517e+06	1488300	1272600	1060700	1.27387e+06	1.79388	0.0180673
Q0PXV6	Large ribosomal subunit protein eL27	LOC103505456		tr|Q0PXV6|Q0PXV6_DIACI	tr|Q0PXV6|Q0PXV6_DIACI Large ribosomal subunit protein eL27 OS=Diaphorina citri OX=121845 GN=LOC103505456 PE=2 SV=1	1	4	4	4	29.9	16.017	1395500	1208700	1319800	1308000	796060	906270	831780	844703	1.54847	0.00184511
Q0PXW3	4a-hydroxytetrahydrobiopterin dehydratase	LOC103505248		tr|Q0PXW3|Q0PXW3_DIACI	tr|Q0PXW3|Q0PXW3_DIACI 4a-hydroxytetrahydrobiopterin dehydratase OS=Diaphorina citri OX=121845 GN=LOC103505248 PE=2 SV=1	1	4	4	4	35.2	16.031	673810	1005300	748300	809137	1211700	1311500	1103300	1.20883e+06	0.669353	0.0268974
Q0PXW4	ATP synthase subunit	LOC103517650	FUNCTION: Mitochondrial membrane ATP synthase (F1F0 ATP synthase or Complex V) produces ATP from ADP in the presence of a proton gradient across the membrane which is generated by electron transport complexes of the respiratory chain. F-type ATPases consist of two structural domains, F1 - containing the extramembraneous catalytic core, and F0 - containing the membrane proton channel, linked toget…	tr|Q0PXW4|Q0PXW4_DIACI	tr|Q0PXW4|Q0PXW4_DIACI ATP synthase subunit OS=Diaphorina citri OX=121845 GN=LOC103517650 PE=2 SV=1	1	7	7	7	82.6	10.023	15158000	13299000	12998000	1.38183e+07	7859600	8758800	9341600	8.65333e+06	1.59688	0.00298079
Q0PXW5	Large ribosomal subunit protein eL32	LOC103510417		tr|Q0PXW5|Q0PXW5_DIACI	tr|Q0PXW5|Q0PXW5_DIACI Large ribosomal subunit protein eL32 OS=Diaphorina citri OX=121845 GN=LOC103510417 PE=2 SV=1	1	5	5	5	38.8	16.102	586790	480740	584370	550633	325620	455040	317310	365990	1.5045	0.0311107
Q0PXW6	Small ribosomal subunit protein uS15	LOC103504825		tr|Q0PXW6|Q0PXW6_DIACI;tr|A0A1S4ET32|A0A1S4ET32_DIACI	tr|Q0PXW6|Q0PXW6_DIACI Small ribosomal subunit protein uS15 OS=Diaphorina citri OX=121845 GN=LOC103504825 PE=2 SV=1	2	5	5	5	32.5	17.118	1524700	1577100	1432600	1.51147e+06	568210	994510	870270	810997	1.86372	0.00630022
Q0PXW9	ATP synthase subunit b			tr|Q0PXW9|Q0PXW9_DIACI;tr|A0A3Q0JDM5|A0A3Q0JDM5_DIACI;tr|A0A3Q0JEE2|A0A3Q0JEE2_DIACI	tr|Q0PXW9|Q0PXW9_DIACI ATP synthase subunit b OS=Diaphorina citri OX=121845 PE=2 SV=1	3	18	18	18	65.9	28.683	34306000	26514000	25266000	2.86953e+07	16619000	18319000	19801000	1.82463e+07	1.57266	0.0245955
Q0PXX5	40S ribosomal protein S14	LOC103506688		tr|Q0PXX5|Q0PXX5_DIACI	tr|Q0PXX5|Q0PXX5_DIACI 40S ribosomal protein S14 OS=Diaphorina citri OX=121845 GN=LOC103506688 PE=2 SV=1	1	9	9	9	64.9	16.236	1872600	2569900	1925000	2122500	3745400	4208200	3103100	3.68557e+06	0.575895	0.0161718
Q0PXY2	40S ribosomal protein S27	LOC103510550		tr|Q0PXY2|Q0PXY2_DIACI	tr|Q0PXY2|Q0PXY2_DIACI 40S ribosomal protein S27 OS=Diaphorina citri OX=121845 GN=LOC103510550 PE=2 SV=1	1	3	3	3	38.1	9.441	1080300	913080	1029700	1.00769e+06	634490	594690	608920	612700	1.64468	0.00148182
Q0PXY7	Ribosomal protein L15	LOC103518561		tr|Q0PXY7|Q0PXY7_DIACI;tr|A0A3Q0JGD6|A0A3Q0JGD6_DIACI	tr|Q0PXY7|Q0PXY7_DIACI Ribosomal protein L15 OS=Diaphorina citri OX=121845 GN=LOC103518561 PE=2 SV=1	2	5	5	5	25.5	24.17	2013900	1382100	1702300	1.69943e+06	1126700	1180700	1075500	1.12763e+06	1.50708	0.0364875
Q0PXY9	Ribosomal protein L19	LOC103523745		tr|Q0PXY9|Q0PXY9_DIACI	tr|Q0PXY9|Q0PXY9_DIACI Ribosomal protein L19 OS=Diaphorina citri OX=121845 GN=LOC103523745 PE=2 SV=1	1	5	5	5	22.6	23.633	1654800	1402100	1684600	1580500	1311600	1016000	1191600	1.17307e+06	1.34732	0.0304037
Q0PXZ4	Small ribosomal subunit protein eS17			tr|Q0PXZ4|Q0PXZ4_DIACI;tr|A0A1S4ESW8|A0A1S4ESW8_DIACI	tr|Q0PXZ4|Q0PXZ4_DIACI Small ribosomal subunit protein eS17 OS=Diaphorina citri OX=121845 PE=2 SV=1;tr|A0A1S4ESW8|A0A1S4ESW8_DIACI 40S ribosomal protein S17 OS=Diaphorina citri OX=121845 GN=LOC103524952 PE=4 SV=1	2	6	6	6	59.8	15.377	1559800	1277700	1415900	1417800	955100	976540	938570	956737	1.48191	0.0049585
Q0PXZ6	40S ribosomal protein S12	LOC103511878		tr|Q0PXZ6|Q0PXZ6_DIACI	tr|Q0PXZ6|Q0PXZ6_DIACI 40S ribosomal protein S12 OS=Diaphorina citri OX=121845 GN=LOC103511878 PE=2 SV=1	1	9	9	9	69.3	15.219	4530500	3972400	4623900	4375600	3661900	3666100	2804700	3.37757e+06	1.29549	0.0468234
Q0PY02	60S ribosomal protein L26	LOC103522681		tr|Q0PY02|Q0PY02_DIACI;tr|A0A3Q0J3Q5|A0A3Q0J3Q5_DIACI	tr|Q0PY02|Q0PY02_DIACI 60S ribosomal protein L26 OS=Diaphorina citri OX=121845 GN=LOC103522681 PE=2 SV=1;tr|A0A3Q0J3Q5|A0A3Q0J3Q5_DIACI 60S ribosomal protein L26-like OS=Diaphorina citri OX=121845 GN=LOC103511904 PE=3 SV=1	2	4	4	4	20.3	17.669	665460	566520	728190	653390	367720	558300	388310	438110	1.49138	0.048221
Q0PXX8	Small ribosomal subunit protein uS2		FUNCTION: Required for the assembly and/or stability of the 40S ribosomal subunit. Required for the processing of the 20S rRNA-precursor to mature 18S rRNA in a late step of the maturation of 40S ribosomal subunits. {ECO:0000255|HAMAP-Rule:MF_03015}.	sp|Q0PXX8|RSSA_DIACI	sp|Q0PXX8|RSSA_DIACI Small ribosomal subunit protein uS2 OS=Diaphorina citri OX=121845 PE=2 SV=1	1	12	12	12	59.5	33.337	2156000	4307600	4373400	3.61233e+06	3712200	4886600	3916100	4.17163e+06	0.865928	0.529563
A0A1S4EG25	Large ribosomal subunit protein eL18	LOC108252857		tr|A0A1S4EG25|A0A1S4EG25_DIACI;tr|A0A1S4EG93|A0A1S4EG93_DIACI;sp|Q0PXY6|RL18_DIACI	tr|A0A1S4EG25|A0A1S4EG25_DIACI Large ribosomal subunit protein eL18 OS=Diaphorina citri OX=121845 GN=LOC108252857 PE=3 SV=1;tr|A0A1S4EG93|A0A1S4EG93_DIACI Large ribosomal subunit protein eL18 OS=Diaphorina citri OX=121845 GN=LOC108252857 PE=3 SV=1;sp|Q0PXY	3	3	3	3	27.2	15.209	1573600	1607900	1885300	1.68893e+06	1471600	1476900	1278700	1.40907e+06	1.19862	0.0771383
A0A075W3Z0	Farnesoic acid o-methyltransferase	LOC103523376		tr|A0A075W3Z0|A0A075W3Z0_DIACI	tr|A0A075W3Z0|A0A075W3Z0_DIACI Farnesoic acid o-methyltransferase OS=Diaphorina citri OX=121845 GN=LOC103523376 PE=2 SV=1	1	3	3	3	13.2	31.247		35190	53013	44101.5	41865	68832	84744	65147	0.676954	0.31466
A0A0A7DNF9	Ferritin	LOC103514874	FUNCTION: Stores iron in a soluble, non-toxic, readily available form. Important for iron homeostasis. Iron is taken up in the ferrous form and deposited as ferric hydroxides after oxidation. {ECO:0000256|RuleBase:RU361145}.	tr|A0A0A7DNF9|A0A0A7DNF9_DIACI	tr|A0A0A7DNF9|A0A0A7DNF9_DIACI Ferritin OS=Diaphorina citri OX=121845 GN=LOC103514874 PE=2 SV=1	1	6	6	6	36.5	27.57	1622900	1357700	1580200	1.52027e+06	2718900	1996700	1083300	1.93297e+06	0.786494	0.438663
A0A0A7DNL8	Glutathione S-transferase	LOC103519049		tr|A0A0A7DNL8|A0A0A7DNL8_DIACI;tr|A0A482LN30|A0A482LN30_DIACI;tr|A0A3Q0J3L6|A0A3Q0J3L6_DIACI	tr|A0A0A7DNL8|A0A0A7DNL8_DIACI Glutathione S-transferase OS=Diaphorina citri OX=121845 GN=LOC103519049 PE=2 SV=1;tr|A0A482LN30|A0A482LN30_DIACI Glutathione S-transferase GST-3 OS=Diaphorina citri OX=121845 GN=GST-3 PE=2 SV=1	3	13	13	12	63.5	23.739	5794600	4373500	4284800	4.81763e+06	4390000	4788100	4701100	4626400	1.04134	0.723578
A0A0A7DNS5	Cathepsin B (Fragment)			tr|A0A0A7DNS5|A0A0A7DNS5_DIACI	tr|A0A0A7DNS5|A0A0A7DNS5_DIACI Cathepsin B (Fragment) OS=Diaphorina citri OX=121845 PE=2 SV=1	1	3	3	3	32.5	16.653	99102	872480	484130	485237	313070	475040	454030	414047	1.17194	0.771396
A0A1S3DQH2	Facilitated trehalose transporter Tret1-like	LOC103522906		tr|A0A1S3DQH2|A0A1S3DQH2_DIACI;tr|A0A0A7DNU3|A0A0A7DNU3_DIACI;tr|A0A3Q0IV31|A0A3Q0IV31_DIACI	tr|A0A1S3DQH2|A0A1S3DQH2_DIACI Facilitated trehalose transporter Tret1-like OS=Diaphorina citri OX=121845 GN=LOC103522906 PE=4 SV=2;tr|A0A0A7DNU3|A0A0A7DNU3_DIACI Sugar transporter 1 OS=Diaphorina citri OX=121845 PE=2 SV=1;tr|A0A3Q0IV31|A0A3Q0IV31_DIACI Fa	3	4	4	4	19.5	37.255	753440	532770	477530	587913	375690	427340	559690	454240	1.29428	0.254382
A0A0A7DNX4	Ras-related C3 botulinum toxin substrate 1	LOC103512003		tr|A0A0A7DNX4|A0A0A7DNX4_DIACI;tr|A0A3Q0JJS4|A0A3Q0JJS4_DIACI	tr|A0A0A7DNX4|A0A0A7DNX4_DIACI Ras-related C3 botulinum toxin substrate 1 OS=Diaphorina citri OX=121845 GN=LOC103512003 PE=2 SV=1	2	6	5	5	49	21.353	172390	259750	457310	296483	278830	409810	480530	389723	0.760753	0.416218
A0A0U4DX43	Cathepsin B-like cysteine peptidase	LOC103512321		tr|A0A0U4DX43|A0A0U4DX43_DIACI;tr|A0A1S3DUR0|A0A1S3DUR0_DIACI	tr|A0A0U4DX43|A0A0U4DX43_DIACI Cathepsin B-like cysteine peptidase OS=Diaphorina citri OX=121845 GN=LOC103512321 PE=2 SV=1	2	6	6	3	31	41.908	514860	879060	941290	778403	367100	428270	511430	435600	1.78697	0.0697729
A0A1S3CTH5	Peptidyl-prolyl cis-trans isomerase	LOC103504931		tr|A0A1S3CTH5|A0A1S3CTH5_DIACI	tr|A0A1S3CTH5|A0A1S3CTH5_DIACI Peptidyl-prolyl cis-trans isomerase OS=Diaphorina citri OX=121845 GN=LOC103504931 PE=4 SV=1	1	4	4	4	47.8	17.625	106070	357310	343350	268910	373970	477650	420620	424080	0.634102	0.148557
A0A1S3CTH6	Uncharacterized protein LOC103504956 isoform X1	LOC103504956		tr|A0A1S3CTH6|A0A1S3CTH6_DIACI	tr|A0A1S3CTH6|A0A1S3CTH6_DIACI Uncharacterized protein LOC103504956 isoform X1 OS=Diaphorina citri OX=121845 GN=LOC103504956 PE=4 SV=2	1	2	2	2	19.9	16.327	5912.5	41619	29254	25595.2	45802	216220	215030	159017	0.160958	0.0813486
A0A1S3CTI2	26S proteasome non-ATPase regulatory subunit 11 isoform X1	LOC103504959		tr|A0A1S3CTI2|A0A1S3CTI2_DIACI	tr|A0A1S3CTI2|A0A1S3CTI2_DIACI 26S proteasome non-ATPase regulatory subunit 11 isoform X1 OS=Diaphorina citri OX=121845 GN=LOC103504959 PE=3 SV=1	1	13	13	13	40.9	46.936	858380	734190	820330	804300	659790	788460	667220	705157	1.1406	0.149015
A0A1S3CTK5	V-type proton ATPase subunit H	LOC103504881	FUNCTION: Subunit of the peripheral V1 complex of vacuolar ATPase. Subunit H activates ATPase activity of the enzyme and couples ATPase activity to proton flow. Vacuolar ATPase is responsible for acidifying a variety of intracellular compartments in eukaryotic cells, thus providing most of the energy required for transport processes in the vacuolar system. {ECO:0000256|PIRNR:PIRNR032184}.	tr|A0A1S3CTK5|A0A1S3CTK5_DIACI	tr|A0A1S3CTK5|A0A1S3CTK5_DIACI V-type proton ATPase subunit H OS=Diaphorina citri OX=121845 GN=LOC103504881 PE=3 SV=1	1	21	21	21	53.9	56.06	5036600	3548100	3637300	4074000	3273800	3230300	3474500	3326200	1.22482	0.200063
A0A1S3CTN3	Coatomer subunit alpha-like	LOC103504929		tr|A0A1S3CTN3|A0A1S3CTN3_DIACI	tr|A0A1S3CTN3|A0A1S3CTN3_DIACI Coatomer subunit alpha-like OS=Diaphorina citri OX=121845 GN=LOC103504929 PE=4 SV=1	1	1	1	1	20.2	10.002	49392	44177	63354	52307.7	23378	42265	43669	36437.3	1.43555	0.141952
A0A1S3CTP4	Glutaredoxin-C3 isoform X3	LOC103505055		tr|A0A1S3CTP4|A0A1S3CTP4_DIACI;tr|A0A3Q0IJ42|A0A3Q0IJ42_DIACI;tr|A0A1S4E6Y1|A0A1S4E6Y1_DIACI;tr|A0A1S4E6Y6|A0A1S4E6Y6_DIACI	tr|A0A1S3CTP4|A0A1S3CTP4_DIACI Glutaredoxin-C3 isoform X3 OS=Diaphorina citri OX=121845 GN=LOC103505055 PE=4 SV=1;tr|A0A3Q0IJ42|A0A3Q0IJ42_DIACI Glutaredoxin-C4 isoform X2 OS=Diaphorina citri OX=121845 GN=LOC103505055 PE=4 SV=1;tr|A0A1S4E6Y1|A0A1S4E6Y1_DIA	4	3	3	3	35	11.142	654550	1678200	1651900	1.32822e+06	303500	574490	480390	452793	2.93338	0.0647348
A0A1S3CTP8	Kinase	LOC103505053		tr|A0A1S3CTP8|A0A1S3CTP8_DIACI	tr|A0A1S3CTP8|A0A1S3CTP8_DIACI Kinase OS=Diaphorina citri OX=121845 GN=LOC103505053 PE=3 SV=1	1	3	3	3	18.8	32.323	134390	135370	122940	130900	120290	154680	137270	137413	0.9526	0.575569
A0A1S3CTQ6	Uncharacterized protein LOC103504975	LOC103504975		tr|A0A1S3CTQ6|A0A1S3CTQ6_DIACI;tr|A0A1S3DRI4|A0A1S3DRI4_DIACI	tr|A0A1S3CTQ6|A0A1S3CTQ6_DIACI Uncharacterized protein LOC103504975 OS=Diaphorina citri OX=121845 GN=LOC103504975 PE=4 SV=1;tr|A0A1S3DRI4|A0A1S3DRI4_DIACI Uncharacterized protein LOC103523069 OS=Diaphorina citri OX=121845 GN=LOC103523069 PE=4 SV=2	2	2	2	2	11.6	23.567	19303	9368.5	23404	17358.5	93078	30639	48390	57369	0.302576	0.10345
A0A1S3CTQ9	Aminomethyltransferase, mitochondrial-like	LOC103505081		tr|A0A1S3CTQ9|A0A1S3CTQ9_DIACI	tr|A0A1S3CTQ9|A0A1S3CTQ9_DIACI Aminomethyltransferase, mitochondrial-like OS=Diaphorina citri OX=121845 GN=LOC103505081 PE=4 SV=2	1	3	3	3	29.9	16.082	157770	220060	232810	203547	172640	129500	207770	169970	1.19754	0.358583
A0A1S3CTV4	Farnesoate epoxidase-like	LOC103505155		tr|A0A1S3CTV4|A0A1S3CTV4_DIACI	tr|A0A1S3CTV4|A0A1S3CTV4_DIACI Farnesoate epoxidase-like OS=Diaphorina citri OX=121845 GN=LOC103505155 PE=3 SV=1	1	4	3	3	47.3	16.083	50520	10190	318360	126357	94542	67386	109430	90452.7	1.39694	0.731311
A0A3Q0IJK0	Uncharacterized protein LOC103505149 isoform X1	LOC103505149		tr|A0A3Q0IJK0|A0A3Q0IJK0_DIACI;tr|A0A1S3CTV5|A0A1S3CTV5_DIACI	tr|A0A3Q0IJK0|A0A3Q0IJK0_DIACI Uncharacterized protein LOC103505149 isoform X1 OS=Diaphorina citri OX=121845 GN=LOC103505149 PE=4 SV=1;tr|A0A1S3CTV5|A0A1S3CTV5_DIACI Uncharacterized protein LOC103505149 isoform X3 OS=Diaphorina citri OX=121845 GN=LOC103505	2	3	3	3	31.2	13.582	251970	635080	567180	484743	1293700	503150	808990	868613	0.558066	0.211937
A0A1S3CTY6	E3 ubiquitin-protein ligase PPP1R11-like	LOC103505194		tr|A0A1S3CTY6|A0A1S3CTY6_DIACI	tr|A0A1S3CTY6|A0A1S3CTY6_DIACI E3 ubiquitin-protein ligase PPP1R11-like OS=Diaphorina citri OX=121845 GN=LOC103505194 PE=4 SV=1	1	1	1	1	27.3	12.406	36560	23946	22161	27555.7	31228	34955	42714	36299	0.75913	0.196982
A0A1S3CU24	Coiled-coil domain-containing protein 43	LOC103505259		tr|A0A1S3CU24|A0A1S3CU24_DIACI	tr|A0A1S3CU24|A0A1S3CU24_DIACI Coiled-coil domain-containing protein 43 OS=Diaphorina citri OX=121845 GN=LOC103505259 PE=3 SV=1	1	1	1	1	7.1	23.82	6322.5	11149	10824	9431.83	8420.7	33459	8959.5	16946.4	0.556569	0.42174
A0A3Q0IJR1	Thyroid receptor-interacting protein 11 isoform X1	LOC103505263		tr|A0A3Q0IJR1|A0A3Q0IJR1_DIACI;tr|A0A1S3CU25|A0A1S3CU25_DIACI;tr|A0A3Q0JJJ1|A0A3Q0JJJ1_DIACI	tr|A0A3Q0IJR1|A0A3Q0IJR1_DIACI Thyroid receptor-interacting protein 11 isoform X1 OS=Diaphorina citri OX=121845 GN=LOC103505263 PE=4 SV=1;tr|A0A1S3CU25|A0A1S3CU25_DIACI Thyroid receptor-interacting protein 11 isoform X2 OS=Diaphorina citri OX=121845 GN=LOC	3	7	7	7	5.1	214.91	115100	166780	107000	129627	125960	134460	55128	105183	1.2324	0.479144
A0A1S3CU39	Uncharacterized protein LOC103505283	LOC103505283		tr|A0A1S3CU39|A0A1S3CU39_DIACI	tr|A0A1S3CU39|A0A1S3CU39_DIACI Uncharacterized protein LOC103505283 OS=Diaphorina citri OX=121845 GN=LOC103505283 PE=4 SV=1	1	1	1	1	14.2	14.035	197410	64285	47557	103084	124990	68365	70871	88075.3	1.17041	0.782688
A0A1S3CU86	RISC-loading complex subunit tarbp2-like	LOC103505389		tr|A0A1S3CU86|A0A1S3CU86_DIACI	tr|A0A1S3CU86|A0A1S3CU86_DIACI RISC-loading complex subunit tarbp2-like OS=Diaphorina citri OX=121845 GN=LOC103505389 PE=4 SV=1	1	5	5	4	25.5	32.228	375310	272620	319990	322640	315430	311420	222690	283180	1.13935	0.404576
A0A1S3CU87	proteasome endopeptidase complex	LOC103505261		tr|A0A1S3CU87|A0A1S3CU87_DIACI	tr|A0A1S3CU87|A0A1S3CU87_DIACI proteasome endopeptidase complex OS=Diaphorina citri OX=121845 GN=LOC103505261 PE=4 SV=1	1	4	4	4	30	29.193	152950	372530	332090	285857	281050	310580	457570	349733	0.817356	0.502556
A0A1S3CUA1	Molybdenum cofactor synthesis protein cinnamon-like isoform X2	LOC103505408		tr|A0A1S3CUA1|A0A1S3CUA1_DIACI;tr|A0A3Q0IK58|A0A3Q0IK58_DIACI	tr|A0A1S3CUA1|A0A1S3CUA1_DIACI Molybdenum cofactor synthesis protein cinnamon-like isoform X2 OS=Diaphorina citri OX=121845 GN=LOC103505408 PE=3 SV=1;tr|A0A3Q0IK58|A0A3Q0IK58_DIACI Molybdenum cofactor synthesis protein cinnamon-like isoform X1 OS=Diaphorin	2	2	2	2	21.3	18.142	30374	48549	41414	40112.3	28875	38676	24680	30743.7	1.30473	0.235682
A0A1S3CUA3	Programmed cell death protein 5 isoform X2	LOC103505406		tr|A0A1S3CUA3|A0A1S3CUA3_DIACI;tr|A0A3Q0IK12|A0A3Q0IK12_DIACI	tr|A0A1S3CUA3|A0A1S3CUA3_DIACI Programmed cell death protein 5 isoform X2 OS=Diaphorina citri OX=121845 GN=LOC103505406 PE=3 SV=1;tr|A0A3Q0IK12|A0A3Q0IK12_DIACI Programmed cell death protein 5 isoform X1 OS=Diaphorina citri OX=121845 GN=LOC103505406 PE=3 S	2	4	4	4	45.5	14.849	227930	164680	160780	184463	214760	217000	166380	199380	0.925185	0.614066
A0A1S3CUB6	Prostatic acid phosphatase	LOC103505300		tr|A0A1S3CUB6|A0A1S3CUB6_DIACI	tr|A0A1S3CUB6|A0A1S3CUB6_DIACI Prostatic acid phosphatase OS=Diaphorina citri OX=121845 GN=LOC103505300 PE=4 SV=1	1	4	4	4	11.9	45.687	162930	263220	173670	199940	273690	257550	113720	214987	0.930011	0.814244
A0A1S3CUI2	Protein D3-like	LOC103505535		tr|A0A1S3CUI2|A0A1S3CUI2_DIACI	tr|A0A1S3CUI2|A0A1S3CUI2_DIACI Protein D3-like OS=Diaphorina citri OX=121845 GN=LOC103505535 PE=4 SV=2	1	4	4	4	25.8	24.767	187220	455510	326370	323033	475890	625500	491510	530967	0.608387	0.0839956
A0A1S3CUK6	Apoptosis inhibitor 5-like	LOC103505580		tr|A0A1S3CUK6|A0A1S3CUK6_DIACI	tr|A0A1S3CUK6|A0A1S3CUK6_DIACI Apoptosis inhibitor 5-like OS=Diaphorina citri OX=121845 GN=LOC103505580 PE=3 SV=1	1	2	2	1	5.6	44.368	20387	2311.4	74361	32353.1	23530	80834	38511	47625	0.679331	0.609745
A0A1S3CUM0	Echinoderm microtubule-associated protein-like 2 isoform X3	LOC103505583		tr|A0A1S3CUM0|A0A1S3CUM0_DIACI;tr|A0A1S3CUL7|A0A1S3CUL7_DIACI;tr|A0A1S3CVX6|A0A1S3CVX6_DIACI	tr|A0A1S3CUM0|A0A1S3CUM0_DIACI Echinoderm microtubule-associated protein-like 2 isoform X3 OS=Diaphorina citri OX=121845 GN=LOC103505583 PE=3 SV=1;tr|A0A1S3CUL7|A0A1S3CUL7_DIACI Echinoderm microtubule-associated protein-like 2 isoform X2 OS=Diaphorina citr	3	12	12	12	21.2	94.129	434650	681740	525360	547250	437530	592100	651510	560380	0.976569	0.898141
A0A1S3CUM1	Stathmin	LOC103505590		tr|A0A1S3CUM1|A0A1S3CUM1_DIACI;tr|A0A1S3CUM8|A0A1S3CUM8_DIACI	tr|A0A1S3CUM1|A0A1S3CUM1_DIACI Stathmin OS=Diaphorina citri OX=121845 GN=LOC103505590 PE=3 SV=1;tr|A0A1S3CUM8|A0A1S3CUM8_DIACI Stathmin-1-A isoform X1 OS=Diaphorina citri OX=121845 GN=LOC103505590 PE=4 SV=1	2	3	3	3	22.6	17.521	378490	131960	269040	259830	473530	66553	143730	227938	1.13992	0.835279
A0A1S3CUM4	Abl interactor 2	LOC103505586		tr|A0A1S3CUM4|A0A1S3CUM4_DIACI	tr|A0A1S3CUM4|A0A1S3CUM4_DIACI Abl interactor 2 OS=Diaphorina citri OX=121845 GN=LOC103505586 PE=3 SV=1	1	2	2	2	6	49.733	51757	97513	69859	73043	83558	73286	33347	63397	1.15215	0.659242
A0A1S3CUN8	Annexin	LOC103505600		tr|A0A1S3CUN8|A0A1S3CUN8_DIACI;tr|A0A1S3D169|A0A1S3D169_DIACI;tr|A0A1S3CZT9|A0A1S3CZT9_DIACI	tr|A0A1S3CUN8|A0A1S3CUN8_DIACI Annexin OS=Diaphorina citri OX=121845 GN=LOC103505600 PE=3 SV=1	3	13	12	9	52.4	37.372	6964300	5566400	5836600	6.12243e+06	8312100	6622600	5657600	6864100	0.89195	0.449651
A0A1S3CUP6	Uncharacterized protein C1683.06c-like	LOC103504892		tr|A0A1S3CUP6|A0A1S3CUP6_DIACI;tr|A0A1S3DQJ0|A0A1S3DQJ0_DIACI	tr|A0A1S3CUP6|A0A1S3CUP6_DIACI Uncharacterized protein C1683.06c-like OS=Diaphorina citri OX=121845 GN=LOC103504892 PE=3 SV=1;tr|A0A1S3DQJ0|A0A1S3DQJ0_DIACI Inosine-uridine preferring nucleoside hydrolase-like OS=Diaphorina citri OX=121845 GN=LOC103522195	2	2	2	2	8.6	35.925	24310	12706	18695	18570.3	13759	94865	28269	45631	0.406967	0.343267
A0A1S3CUQ7	Guanine nucleotide-binding protein G(S) subunit alpha isoform X1	LOC103505624		tr|A0A1S3CUQ7|A0A1S3CUQ7_DIACI;tr|A0A1S4E720|A0A1S4E720_DIACI;tr|A0A3Q0IP34|A0A3Q0IP34_DIACI	tr|A0A1S3CUQ7|A0A1S3CUQ7_DIACI Guanine nucleotide-binding protein G(S) subunit alpha isoform X1 OS=Diaphorina citri OX=121845 GN=LOC103505624 PE=3 SV=1;tr|A0A1S4E720|A0A1S4E720_DIACI Guanine nucleotide-binding protein G(S) subunit alpha isoform X2 OS=Diaph	3	8	8	8	30.9	44.3	614910	371800	381790	456167	363370	363070	406820	377753	1.20758	0.386467
A0A1S3CW28	Cytochrome c oxidase subunit 4	LOC103505632		tr|A0A1S3CW28|A0A1S3CW28_DIACI;tr|A0A1S3CUR7|A0A1S3CUR7_DIACI;tr|A0A1S3CUR6|A0A1S3CUR6_DIACI	tr|A0A1S3CW28|A0A1S3CW28_DIACI Cytochrome c oxidase subunit 4 OS=Diaphorina citri OX=121845 GN=LOC103505632 PE=3 SV=1;tr|A0A1S3CUR7|A0A1S3CUR7_DIACI Cytochrome c oxidase subunit 4 OS=Diaphorina citri OX=121845 GN=LOC103505633 PE=3 SV=1;tr|A0A1S3CUR6|A0A1S3	3	2	2	2	12.4	26.195	52339	57996	58279	56204.7		36274	66286	51280	1.09603	0.696397
A0A1S3DEP1	glutathione transferase	LOC103516914		tr|A0A1S3DEP1|A0A1S3DEP1_DIACI;tr|A0A1S3CUR9|A0A1S3CUR9_DIACI	tr|A0A1S3DEP1|A0A1S3DEP1_DIACI glutathione transferase OS=Diaphorina citri OX=121845 GN=LOC103516914 PE=3 SV=1;tr|A0A1S3CUR9|A0A1S3CUR9_DIACI glutathione transferase OS=Diaphorina citri OX=121845 GN=LOC103505568 PE=3 SV=1	2	1	1	1	7.8	17.66	1057800	625960	563640	749133	660370	567580	673860	633937	1.18172	0.508685
A0A1S3CUS4	Interferon regulatory factor 2-binding protein-like B	LOC103505582		tr|A0A1S3CUS4|A0A1S3CUS4_DIACI	tr|A0A1S3CUS4|A0A1S3CUS4_DIACI Interferon regulatory factor 2-binding protein-like B OS=Diaphorina citri OX=121845 GN=LOC103505582 PE=3 SV=1	1	1	1	1	2.5	54.914	758780	11489	17125	262465	7166.1	5029.8	4938.3	5711.4	45.9545	0.359298
A0A1S3CUV1	Vacuolar protein sorting-associated protein 35	LOC103505696	FUNCTION: Plays a role in vesicular protein sorting. {ECO:0000256|PIRNR:PIRNR009375}.	tr|A0A1S3CUV1|A0A1S3CUV1_DIACI	tr|A0A1S3CUV1|A0A1S3CUV1_DIACI Vacuolar protein sorting-associated protein 35 OS=Diaphorina citri OX=121845 GN=LOC103505696 PE=3 SV=1	1	16	16	16	29.8	90.529	1239300	868700	924070	1010690	533010	721180	714980	656390	1.53977	0.0537021
A0A1S3CUV2	Prefoldin subunit 6	LOC103505690		tr|A0A1S3CUV2|A0A1S3CUV2_DIACI	tr|A0A1S3CUV2|A0A1S3CUV2_DIACI Prefoldin subunit 6 OS=Diaphorina citri OX=121845 GN=LOC103505690 PE=3 SV=1	1	3	3	3	27.4	14.688	193150	133850	145420	157473	229430	189990	122020	180480	0.872525	0.560035
A0A1S3DK33	Splicing factor U2af 38 kDa subunit	LOC103520222		tr|A0A1S3DK33|A0A1S3DK33_DIACI;tr|A0A1S3CUW1|A0A1S3CUW1_DIACI;tr|A0A1S3D5B4|A0A1S3D5B4_DIACI	tr|A0A1S3DK33|A0A1S3DK33_DIACI Splicing factor U2af 38 kDa subunit OS=Diaphorina citri OX=121845 GN=LOC103520222 PE=4 SV=1;tr|A0A1S3CUW1|A0A1S3CUW1_DIACI Splicing factor U2af 38 kDa subunit-like OS=Diaphorina citri OX=121845 GN=LOC103505713 PE=4 SV=1;tr|A0	3	2	2	2	12.8	27.551		58378	40780	49579	34692	38299	47812	40267.7	1.23124	0.342563
A0A1S3CUX3	Ubiquitin-conjugating enzyme E2 variant 2-like	LOC103505008		tr|A0A1S3CUX3|A0A1S3CUX3_DIACI	tr|A0A1S3CUX3|A0A1S3CUX3_DIACI Ubiquitin-conjugating enzyme E2 variant 2-like OS=Diaphorina citri OX=121845 GN=LOC103505008 PE=4 SV=1	1	2	2	2	22.3	11.989	261160	299600	283200	281320	167050	244620	234510	215393	1.30608	0.0695113
A0A1S3CUY0	Filamin-A-like	LOC103505729		tr|A0A1S3CUY0|A0A1S3CUY0_DIACI	tr|A0A1S3CUY0|A0A1S3CUY0_DIACI Filamin-A-like OS=Diaphorina citri OX=121845 GN=LOC103505729 PE=3 SV=1	1	1	1	1	10.6	17.053	24814	4263.2	55599	28225.4	53476	35958	46277	45237	0.623945	0.341135
A0A1S3CV00	Cathepsin B-like cysteine proteinase 4	LOC103505051		tr|A0A1S3CV00|A0A1S3CV00_DIACI	tr|A0A1S3CV00|A0A1S3CV00_DIACI Cathepsin B-like cysteine proteinase 4 OS=Diaphorina citri OX=121845 GN=LOC103505051 PE=3 SV=1	1	6	6	6	25.4	41.273	141700	241480	327130	236770	81725	194170	185930	153942	1.53805	0.2694
A0A1S4E6B9	Translocation protein SEC63 homolog isoform X1	LOC103505072		tr|A0A1S4E6B9|A0A1S4E6B9_DIACI;tr|A0A1S3CV10|A0A1S3CV10_DIACI	tr|A0A1S4E6B9|A0A1S4E6B9_DIACI Translocation protein SEC63 homolog isoform X1 OS=Diaphorina citri OX=121845 GN=LOC103505072 PE=4 SV=1;tr|A0A1S3CV10|A0A1S3CV10_DIACI Translocation protein SEC63 homolog isoform X2 OS=Diaphorina citri OX=121845 GN=LOC10350507	2	2	2	2	4.8	89.784	121890		36265	79077.5	23640	25788	5458.3	18295.4	4.32225	0.16254
A0A1S3CV42	Cystinosin homolog	LOC103505825		tr|A0A1S3CV42|A0A1S3CV42_DIACI	tr|A0A1S3CV42|A0A1S3CV42_DIACI Cystinosin homolog OS=Diaphorina citri OX=121845 GN=LOC103505825 PE=3 SV=1	1	1	1	1	4.8	37.423	52538	56735	44939	51404	41504	51295	55701	49500	1.03846	0.743682
A0A1S3CV45	GTP-binding protein 128up-like	LOC103505742		tr|A0A1S3CV45|A0A1S3CV45_DIACI	tr|A0A1S3CV45|A0A1S3CV45_DIACI GTP-binding protein 128up-like OS=Diaphorina citri OX=121845 GN=LOC103505742 PE=4 SV=1	1	4	4	4	21.2	30.913	211070	102780	137630	150493	91926	98439	87133	92499.3	1.62697	0.144948
A0A1S3CV53	Glycogen synthase kinase-3 beta-like	LOC103505841		tr|A0A1S3CV53|A0A1S3CV53_DIACI;tr|A0A1S3DPS6|A0A1S3DPS6_DIACI	tr|A0A1S3CV53|A0A1S3CV53_DIACI Glycogen synthase kinase-3 beta-like OS=Diaphorina citri OX=121845 GN=LOC103505841 PE=3 SV=1;tr|A0A1S3DPS6|A0A1S3DPS6_DIACI Glycogen synthase kinase-3-like OS=Diaphorina citri OX=121845 GN=LOC103522575 PE=4 SV=2	2	8	8	8	38.7	36.71	384690	432490	509060	442080	265230	404250	436130	368537	1.19955	0.31293
A0A1S3CV61	Pyrroline-5-carboxylate reductase	LOC103505866		tr|A0A1S3CV61|A0A1S3CV61_DIACI;tr|A0A1S3CV68|A0A1S3CV68_DIACI;tr|A0A1S3CV63|A0A1S3CV63_DIACI	tr|A0A1S3CV61|A0A1S3CV61_DIACI Pyrroline-5-carboxylate reductase OS=Diaphorina citri OX=121845 GN=LOC103505866 PE=3 SV=1;tr|A0A1S3CV68|A0A1S3CV68_DIACI Pyrroline-5-carboxylate reductase OS=Diaphorina citri OX=121845 GN=LOC103505866 PE=3 SV=1;tr|A0A1S3CV63|	3	8	8	8	46.2	31.456	1206400	1539300	1768500	1.50473e+06	1259800	1510700	1493700	1421400	1.05863	0.671071
A0A1S3CV73	MICOS complex subunit	LOC103505869	FUNCTION: Component of the MICOS complex, a large protein complex of the mitochondrial inner membrane that plays crucial roles in the maintenance of crista junctions, inner membrane architecture, and formation of contact sites to the outer membrane. {ECO:0000256|RuleBase:RU363021}.	tr|A0A1S3CV73|A0A1S3CV73_DIACI;tr|A0A1S3CV66|A0A1S3CV66_DIACI	tr|A0A1S3CV73|A0A1S3CV73_DIACI MICOS complex subunit OS=Diaphorina citri OX=121845 GN=LOC103505869 PE=3 SV=1;tr|A0A1S3CV66|A0A1S3CV66_DIACI MICOS complex subunit OS=Diaphorina citri OX=121845 GN=LOC103505869 PE=3 SV=1	2	13	13	13	72.8	26.694	3521400	2545400	2516400	2.86107e+06	2011700	1907400	2033500	1984200	1.44192	0.0577771
A0A1S3CV85	inorganic diphosphatase	LOC103505878		tr|A0A1S3CV85|A0A1S3CV85_DIACI	tr|A0A1S3CV85|A0A1S3CV85_DIACI inorganic diphosphatase OS=Diaphorina citri OX=121845 GN=LOC103505878 PE=3 SV=1	1	11	11	11	60.7	30.92	10898000	7821600	7965300	8.89497e+06	10751000	8913700	6814800	8826500	1.00776	0.966139
A0A1S3CV89	LOW QUALITY PROTEIN: uncharacterized protein LOC103505908	LOC103505908		tr|A0A1S3CV89|A0A1S3CV89_DIACI	tr|A0A1S3CV89|A0A1S3CV89_DIACI LOW QUALITY PROTEIN: uncharacterized protein LOC103505908 OS=Diaphorina citri OX=121845 GN=LOC103505908 PE=4 SV=2	1	1	1	1	1	121.32	4176000	1969000	114050	2086350	875710	62871	1200200	712927	2.92646	0.32387
A0A1S3CVB6	Glutathione peroxidase	LOC103505868		tr|A0A1S3CVB6|A0A1S3CVB6_DIACI	tr|A0A1S3CVB6|A0A1S3CVB6_DIACI Glutathione peroxidase OS=Diaphorina citri OX=121845 GN=LOC103505868 PE=3 SV=1	1	6	6	6	50	18.786	1649800	1077500	1202500	1.30993e+06	840530	949110	852950	880863	1.4871	0.0725232
A0A1S3D7J2	Testis-specific serine/threonine-protein kinase 3-like	LOC103512965		tr|A0A1S3D7J2|A0A1S3D7J2_DIACI;tr|A0A1S3CVF1|A0A1S3CVF1_DIACI	tr|A0A1S3D7J2|A0A1S3D7J2_DIACI Testis-specific serine/threonine-protein kinase 3-like OS=Diaphorina citri OX=121845 GN=LOC103512965 PE=3 SV=1;tr|A0A1S3CVF1|A0A1S3CVF1_DIACI Testis-specific serine/threonine-protein kinase 4-like OS=Diaphorina citri OX=12184	2	1	1	1	2.8	39.945		12317	11845	12081	18195	13239	19999	17144.3	0.704664	0.148244
A0A1S3CVH1	Uncharacterized protein LOC103505958	LOC103505958		tr|A0A1S3CVH1|A0A1S3CVH1_DIACI	tr|A0A1S3CVH1|A0A1S3CVH1_DIACI Uncharacterized protein LOC103505958 OS=Diaphorina citri OX=121845 GN=LOC103505958 PE=4 SV=1	1	8	8	8	38.5	30.255	6677000	4234600	4225400	5.04567e+06	5381200	3993300	3412900	4.26247e+06	1.18374	0.478571
A0A1S3CVH5	HIG1 domain family member 2A, mitochondrial isoform X1	LOC103506066		tr|A0A1S3CVH5|A0A1S3CVH5_DIACI	tr|A0A1S3CVH5|A0A1S3CVH5_DIACI HIG1 domain family member 2A, mitochondrial isoform X1 OS=Diaphorina citri OX=121845 GN=LOC103506066 PE=4 SV=1	1	2	2	2	31.7	11.618	803300	369930	460980	544737	323370	101710	25053	150044	3.6305	0.068483
A0A1S3CVJ1	Tubulin beta chain	LOC103506000	FUNCTION: Tubulin is the major constituent of microtubules. It binds two moles of GTP, one at an exchangeable site on the beta chain and one at a non-exchangeable site on the alpha chain. {ECO:0000256|RuleBase:RU000352, ECO:0000256|SAAS:SAAS00031082}.	tr|A0A1S3CVJ1|A0A1S3CVJ1_DIACI	tr|A0A1S3CVJ1|A0A1S3CVJ1_DIACI Tubulin beta chain OS=Diaphorina citri OX=121845 GN=LOC103506000 PE=3 SV=1	1	19	15	14	64.5	50.906	1336800	1694600	1659600	1.56367e+06	1818300	1925600	3385200	2.37637e+06	0.658007	0.191774
A0A1S3CVJ4	Eukaryotic translation initiation factor 4E-binding protein 1	LOC103506044		tr|A0A1S3CVJ4|A0A1S3CVJ4_DIACI	tr|A0A1S3CVJ4|A0A1S3CVJ4_DIACI Eukaryotic translation initiation factor 4E-binding protein 1 OS=Diaphorina citri OX=121845 GN=LOC103506044 PE=3 SV=1	1	4	4	4	58.2	11.931	103410	135010	89122	109181	135160	81400	61641	92733.7	1.17736	0.558669
A0A1S3CVK8	C-terminal-binding protein isoform X3	LOC103506120		tr|A0A1S3CVK8|A0A1S3CVK8_DIACI;tr|A0A1S3CWX9|A0A1S3CWX9_DIACI;tr|A0A1S3CVR8|A0A1S3CVR8_DIACI	tr|A0A1S3CVK8|A0A1S3CVK8_DIACI C-terminal-binding protein isoform X3 OS=Diaphorina citri OX=121845 GN=LOC103506120 PE=3 SV=1;tr|A0A1S3CWX9|A0A1S3CWX9_DIACI C-terminal-binding protein isoform X2 OS=Diaphorina citri OX=121845 GN=LOC103506120 PE=3 SV=1;tr|A0A	3	4	4	4	13.1	52.118	228060	131240	176930	178743	75581	186830	198310	153574	1.16389	0.628437
A0A1S3CVN0	BAG family molecular chaperone regulator 2	LOC103506121		tr|A0A1S3CVN0|A0A1S3CVN0_DIACI	tr|A0A1S3CVN0|A0A1S3CVN0_DIACI BAG family molecular chaperone regulator 2 OS=Diaphorina citri OX=121845 GN=LOC103506121 PE=4 SV=1	1	6	6	6	45.9	22.253	187850	205070	168040	186987	200540	304520	188430	231163	0.808894	0.313692
A0A1S3CVN3	Glycerol-3-phosphate phosphatase	LOC103506152		tr|A0A1S3CVN3|A0A1S3CVN3_DIACI	tr|A0A1S3CVN3|A0A1S3CVN3_DIACI Glycerol-3-phosphate phosphatase OS=Diaphorina citri OX=121845 GN=LOC103506152 PE=3 SV=1	1	3	3	3	18.1	33.884	304240	315900	342870	321003	376520	273780	271440	307247	1.04477	0.725274
A0A1S3CVN5	Cuticle protein 7-like	LOC103506128		tr|A0A1S3CVN5|A0A1S3CVN5_DIACI	tr|A0A1S3CVN5|A0A1S3CVN5_DIACI Cuticle protein 7-like OS=Diaphorina citri OX=121845 GN=LOC103506128 PE=4 SV=1	1	2	2	2	25.8	16.181	586910	210860	332440	376737	415450	684220	594850	564840	0.666979	0.239073
A0A1S4E825	Protein TFG isoform X2	LOC103506133		tr|A0A1S4E825|A0A1S4E825_DIACI;tr|A0A1S3CVP0|A0A1S3CVP0_DIACI	tr|A0A1S4E825|A0A1S4E825_DIACI Protein TFG isoform X2 OS=Diaphorina citri OX=121845 GN=LOC103506133 PE=4 SV=1;tr|A0A1S3CVP0|A0A1S3CVP0_DIACI Protein TFG isoform X1 OS=Diaphorina citri OX=121845 GN=LOC103506133 PE=4 SV=1	2	3	3	3	20.1	36.939	73041	19073	97232	63115.3	49025	94003	97987	80338.3	0.785619	0.570849
A0A1S3CVP9	Actin, muscle isoform X1	LOC103506086		tr|A0A1S3CVP9|A0A1S3CVP9_DIACI;tr|A0A3Q0ILA9|A0A3Q0ILA9_DIACI;tr|A0A3Q0IWK8|A0A3Q0IWK8_DIACI;tr|A0A3Q0IRS7|A0A3Q0IRS7_DIACI	tr|A0A1S3CVP9|A0A1S3CVP9_DIACI Actin, muscle isoform X1 OS=Diaphorina citri OX=121845 GN=LOC103506086 PE=3 SV=1;tr|A0A3Q0ILA9|A0A3Q0ILA9_DIACI Actin, clone 205 isoform X2 OS=Diaphorina citri OX=121845 GN=LOC103506086 PE=3 SV=1	4	32	32	6	87.5	41.785	456870000	332980000	323240000	371030000	276420000	271300000	327940000	2.91887e+08	1.27114	0.165096
A0A1S3CVQ2	Septin-2	LOC103506190		tr|A0A1S3CVQ2|A0A1S3CVQ2_DIACI	tr|A0A1S3CVQ2|A0A1S3CVQ2_DIACI Septin-2 OS=Diaphorina citri OX=121845 GN=LOC103506190 PE=3 SV=1	1	2	2	2	8.9	46.987	133740	140300	171200	148413	163070	157180	129890	150047	0.989114	0.920756
A0A1S3CVR5	Complex III subunit 9	LOC103506148		tr|A0A1S3CVR5|A0A1S3CVR5_DIACI	tr|A0A1S3CVR5|A0A1S3CVR5_DIACI Complex III subunit 9 OS=Diaphorina citri OX=121845 GN=LOC103506148 PE=3 SV=1	1	4	4	4	70.7	6.7817	5504500	3351500	3449600	4.10187e+06	2520700	2425200	2543700	2.49653e+06	1.64302	0.0844027
A0A3Q0IL98	Serine/threonine-protein kinase mig-15 isoform X3	LOC103506122		tr|A0A3Q0IL98|A0A3Q0IL98_DIACI;tr|A0A1S3CVS3|A0A1S3CVS3_DIACI;tr|A0A1S4E829|A0A1S4E829_DIACI;tr|A0A3Q0IN68|A0A3Q0IN68_DIACI	tr|A0A3Q0IL98|A0A3Q0IL98_DIACI Serine/threonine-protein kinase mig-15 isoform X3 OS=Diaphorina citri OX=121845 GN=LOC103506122 PE=4 SV=1;tr|A0A1S3CVS3|A0A1S3CVS3_DIACI Serine/threonine-protein kinase mig-15 isoform X2 OS=Diaphorina citri OX=121845 GN=LOC10	4	2	2	2	2.7	137.94	22615	4134.6	18219	14989.5		74881	6028.6	40454.8	0.370525	0.40979
A0A1S3CVS6	Uncharacterized protein LOC103506162	LOC103506162		tr|A0A1S3CVS6|A0A1S3CVS6_DIACI	tr|A0A1S3CVS6|A0A1S3CVS6_DIACI Uncharacterized protein LOC103506162 OS=Diaphorina citri OX=121845 GN=LOC103506162 PE=4 SV=1	1	1	1	1	18.9	16.771		64171	59701	61936	46788	146190	78023	90333.7	0.685636	0.508341
A0A1S3CVU1	WAS/WASL-interacting protein family member 2-like	LOC103506191		tr|A0A1S3CVU1|A0A1S3CVU1_DIACI	tr|A0A1S3CVU1|A0A1S3CVU1_DIACI WAS/WASL-interacting protein family member 2-like OS=Diaphorina citri OX=121845 GN=LOC103506191 PE=3 SV=1	1	1	1	1	5.7	21.698	46094	25754	31361	34403	55029	36281	25886	39065.3	0.880653	0.678979
A0A1S3CVU8	GTPase HRas	LOC103506233		tr|A0A1S3CVU8|A0A1S3CVU8_DIACI	tr|A0A1S3CVU8|A0A1S3CVU8_DIACI GTPase HRas OS=Diaphorina citri OX=121845 GN=LOC103506233 PE=4 SV=1	1	6	6	6	45.5	21.548	589260	454720	467540	503840	486800	497910	455660	480123	1.0494	0.623774
A0A1S3CVV0	Uncharacterized protein LOC103505544	LOC103505544		tr|A0A1S3CVV0|A0A1S3CVV0_DIACI	tr|A0A1S3CVV0|A0A1S3CVV0_DIACI Uncharacterized protein LOC103505544 OS=Diaphorina citri OX=121845 GN=LOC103505544 PE=4 SV=1	1	2	2	2	24.3	15.139	74054	73871	66005	71310	68334	65214	77103	70217	1.01557	0.817623
A0A1S3CVV4	Uncharacterized protein LOC103506172 isoform X1	LOC103506172		tr|A0A1S3CVV4|A0A1S3CVV4_DIACI	tr|A0A1S3CVV4|A0A1S3CVV4_DIACI Uncharacterized protein LOC103506172 isoform X1 OS=Diaphorina citri OX=121845 GN=LOC103506172 PE=4 SV=2	1	1	1	1	0.9	164.28	2094600	1831700	1619600	1.84863e+06	2349100	1925100	1716400	1.99687e+06	0.925767	0.556553
A0A1S3CVX1	Uncharacterized protein LOC103505570	LOC103505570		tr|A0A1S3CVX1|A0A1S3CVX1_DIACI	tr|A0A1S3CVX1|A0A1S3CVX1_DIACI Uncharacterized protein LOC103505570 OS=Diaphorina citri OX=121845 GN=LOC103505570 PE=4 SV=1	1	3	3	3	10.8	50.582		12968	8110.8	10539.4	17585	21484	113660	50909.7	0.207022	0.393059
A0A1S3CVX9	Uncharacterized protein LOC103506326	LOC103506326		tr|A0A1S3CVX9|A0A1S3CVX9_DIACI	tr|A0A1S3CVX9|A0A1S3CVX9_DIACI Uncharacterized protein LOC103506326 OS=Diaphorina citri OX=121845 GN=LOC103506326 PE=3 SV=1	1	2	2	2	16.6	17.731	104220	37839	92107	78055.3	60165	25665	18354	34728	2.24762	0.147131
A0A3Q0IVZ7	Erlin-1	LOC103508028		tr|A0A3Q0IVZ7|A0A3Q0IVZ7_DIACI;tr|A0A1S3CW00|A0A1S3CW00_DIACI	tr|A0A3Q0IVZ7|A0A3Q0IVZ7_DIACI Erlin-1 OS=Diaphorina citri OX=121845 GN=LOC103508028 PE=3 SV=1;tr|A0A1S3CW00|A0A1S3CW00_DIACI Erlin-1 OS=Diaphorina citri OX=121845 GN=LOC103506365 PE=3 SV=1	2	4	4	4	22.6	35.743	40808	55194	73896	56632.7	46960	75398	88787	70381.7	0.804651	0.428319
A0A1S3CW15	Superoxide dismutase	LOC103506397	FUNCTION: Destroys radicals which are normally produced within the cells and which are toxic to biological systems. {ECO:0000256|RuleBase:RU000414}.	tr|A0A1S3CW15|A0A1S3CW15_DIACI;tr|A0A1S3CW51|A0A1S3CW51_DIACI;tr|A0A3Q0ILU4|A0A3Q0ILU4_DIACI	tr|A0A1S3CW15|A0A1S3CW15_DIACI Superoxide dismutase OS=Diaphorina citri OX=121845 GN=LOC103506397 PE=3 SV=1;tr|A0A1S3CW51|A0A1S3CW51_DIACI Superoxide dismutase OS=Diaphorina citri OX=121845 GN=LOC103506397 PE=3 SV=1;tr|A0A3Q0ILU4|A0A3Q0ILU4_DIACI Superoxid	3	13	13	13	75.9	24.854	16818000	11663000	11034000	1.31717e+07	11689000	11307000	8985900	1.06606e+07	1.23554	0.281209
A0A1S3CW24	Uncharacterized protein LOC103506299	LOC103506299		tr|A0A1S3CW24|A0A1S3CW24_DIACI;tr|A0A3Q0ILV9|A0A3Q0ILV9_DIACI	tr|A0A1S3CW24|A0A1S3CW24_DIACI Uncharacterized protein LOC103506299 OS=Diaphorina citri OX=121845 GN=LOC103506299 PE=3 SV=1	2	3	3	3	15.2	31.344	1814.5	84308	96216	60779.5	59674	117990	140180	105948	0.573673	0.302257
A0A1S3CW67	mRNA-decapping enzyme-like protein	LOC103506448		tr|A0A1S3CW67|A0A1S3CW67_DIACI	tr|A0A1S3CW67|A0A1S3CW67_DIACI mRNA-decapping enzyme-like protein OS=Diaphorina citri OX=121845 GN=LOC103506448 PE=3 SV=1	1	1	1	1	3	44.773	17287	16239	15716	16414	17859	23616	13809	18428	0.89071	0.523237
A0A3Q0ISR7	Ubiquitin domain-containing protein UBFD1 isoform X2	LOC103506425		tr|A0A3Q0ISR7|A0A3Q0ISR7_DIACI;tr|A0A1S3CW76|A0A1S3CW76_DIACI	tr|A0A3Q0ISR7|A0A3Q0ISR7_DIACI Ubiquitin domain-containing protein UBFD1 isoform X2 OS=Diaphorina citri OX=121845 GN=LOC103506425 PE=4 SV=1;tr|A0A1S3CW76|A0A1S3CW76_DIACI Ubiquitin domain-containing protein UBFD1 isoform X1 OS=Diaphorina citri OX=121845 GN	2	4	4	4	24.2	31.441	160510	87223	85001	110911	96930	88164	95030	93374.7	1.18781	0.52089
A0A1S3CW83	Uncharacterized protein LOC103506411	LOC103506411		tr|A0A1S3CW83|A0A1S3CW83_DIACI	tr|A0A1S3CW83|A0A1S3CW83_DIACI Uncharacterized protein LOC103506411 OS=Diaphorina citri OX=121845 GN=LOC103506411 PE=4 SV=1	1	2	2	2	37.1	17.616		54437	48781	51609	69769	115100	181690	122186	0.422379	0.191574
A0A1S3CW85	Probable nuclear hormone receptor HR3	LOC103506495		tr|A0A1S3CW85|A0A1S3CW85_DIACI	tr|A0A1S3CW85|A0A1S3CW85_DIACI Probable nuclear hormone receptor HR3 OS=Diaphorina citri OX=121845 GN=LOC103506495 PE=3 SV=1	1	1	1	1	2	51.017	1771600	1651600	2017200	1.81347e+06	2248500	1478600	12101	1.2464e+06	1.45496	0.441678
A0A1S3CW90	glycerol kinase	LOC103506505		tr|A0A1S3CW90|A0A1S3CW90_DIACI;tr|A0A1S3DP08|A0A1S3DP08_DIACI	tr|A0A1S3CW90|A0A1S3CW90_DIACI glycerol kinase OS=Diaphorina citri OX=121845 GN=LOC103506505 PE=3 SV=1	2	8	8	8	26.1	57.149	358670	189410	255120	267733	49912	177430	177310	134884	1.98492	0.110681
A0A1S3CW92	Troponin C	LOC103506455		tr|A0A1S3CW92|A0A1S3CW92_DIACI	tr|A0A1S3CW92|A0A1S3CW92_DIACI Troponin C OS=Diaphorina citri OX=121845 GN=LOC103506455 PE=4 SV=1	1	3	3	3	27.9	15.796	50117	197150	205670	150979	232160	259080	163260	218167	0.692035	0.311111
A0A1S3CW97	Protein NDUFAF4 homolog	LOC103506460		tr|A0A1S3CW97|A0A1S3CW97_DIACI	tr|A0A1S3CW97|A0A1S3CW97_DIACI Protein NDUFAF4 homolog OS=Diaphorina citri OX=121845 GN=LOC103506460 PE=4 SV=1	1	1	1	1	7.4	31.289	189550	118220	115390	141053	74523	88266	66711	76500	1.84383	0.0616357
A0A1S3CW98	Papilin-like	LOC103506437		tr|A0A1S3CW98|A0A1S3CW98_DIACI	tr|A0A1S3CW98|A0A1S3CW98_DIACI Papilin-like OS=Diaphorina citri OX=121845 GN=LOC103506437 PE=4 SV=1	1	8	8	8	33.1	37.326	826680	499050	476850	600860	729160	507980	418020	551720	1.08907	0.753461
A0A1S3CWA9	Uncharacterized protein LOC103506538	LOC103506538		tr|A0A1S3CWA9|A0A1S3CWA9_DIACI	tr|A0A1S3CWA9|A0A1S3CWA9_DIACI Uncharacterized protein LOC103506538 OS=Diaphorina citri OX=121845 GN=LOC103506538 PE=4 SV=1	1	2	2	2	16	24.184	324820	104350	661820	363663	69442	70852	108280	82858	4.38899	0.159233
A0A1S3CWB5	Protein obstructor-E	LOC103506532		tr|A0A1S3CWB5|A0A1S3CWB5_DIACI	tr|A0A1S3CWB5|A0A1S3CWB5_DIACI Protein obstructor-E OS=Diaphorina citri OX=121845 GN=LOC103506532 PE=4 SV=1	1	3	3	3	16.6	33.368	24401	45811	51248	40486.7	14118	79803	34927	42949.3	0.942661	0.912474
A0A1S3CWC7	RNA-binding protein squid-like	LOC103506472		tr|A0A1S3CWC7|A0A1S3CWC7_DIACI	tr|A0A1S3CWC7|A0A1S3CWC7_DIACI RNA-binding protein squid-like OS=Diaphorina citri OX=121845 GN=LOC103506472 PE=4 SV=1	1	10	4	4	46.2	29.93	344820	334550	374960	351443	311400	321760	336160	323107	1.0877	0.114693
A0A1S3CWC9	COP9 signalosome complex subunit 6	LOC103506573	FUNCTION: Component of the COP9 signalosome complex (CSN), a complex involved in various cellular and developmental processes. {ECO:0000256|RuleBase:RU367006}.	tr|A0A1S3CWC9|A0A1S3CWC9_DIACI	tr|A0A1S3CWC9|A0A1S3CWC9_DIACI COP9 signalosome complex subunit 6 OS=Diaphorina citri OX=121845 GN=LOC103506573 PE=3 SV=1	1	4	4	4	21.5	36.816	49074	53650	39040	47254.7	16744	178480	55421	83548.3	0.565597	0.499609
A0A1S3CWE0	40S ribosomal protein S24	LOC103506570		tr|A0A1S3CWE0|A0A1S3CWE0_DIACI;tr|A0A3Q0IM69|A0A3Q0IM69_DIACI;tr|Q0PXY5|Q0PXY5_DIACI	tr|A0A1S3CWE0|A0A1S3CWE0_DIACI 40S ribosomal protein S24 OS=Diaphorina citri OX=121845 GN=LOC103506570 PE=3 SV=1;tr|A0A3Q0IM69|A0A3Q0IM69_DIACI 40S ribosomal protein S24 OS=Diaphorina citri OX=121845 GN=LOC103506570 PE=3 SV=1;tr|Q0PXY5|Q0PXY5_DIACI 40S rib	3	3	3	3	36	15.568	1680400	870550	1105500	1.21882e+06	661600	990850	719270	790573	1.54169	0.176309
A0A1S3CXS6	Galactose mutarotase	LOC103506599		tr|A0A1S3CXS6|A0A1S3CXS6_DIACI;tr|A0A1S3CWF4|A0A1S3CWF4_DIACI	tr|A0A1S3CXS6|A0A1S3CXS6_DIACI Galactose mutarotase OS=Diaphorina citri OX=121845 GN=LOC103506599 PE=4 SV=1;tr|A0A1S3CWF4|A0A1S3CWF4_DIACI Galactose mutarotase OS=Diaphorina citri OX=121845 GN=LOC103506600 PE=4 SV=2	2	1	1	1	8.5	24.134		4222	2020.7	3121.35		8189.9	44921	26555.5	0.117541	0.330773
A0A1S3CWG7	Uncharacterized protein LOC103505835	LOC103505835		tr|A0A1S3CWG7|A0A1S3CWG7_DIACI;tr|A0A3Q0IR97|A0A3Q0IR97_DIACI;tr|A0A3Q0IKT5|A0A3Q0IKT5_DIACI	tr|A0A1S3CWG7|A0A1S3CWG7_DIACI Uncharacterized protein LOC103505835 OS=Diaphorina citri OX=121845 GN=LOC103505835 PE=4 SV=2	3	6	6	6	20.7	67.676	266820	316890	234370	272693	133760	211030	255400	200063	1.36304	0.165598
A0A1S3CWG9	Uncharacterized protein LOC103506625	LOC103506625		tr|A0A1S3CWG9|A0A1S3CWG9_DIACI	tr|A0A1S3CWG9|A0A1S3CWG9_DIACI Uncharacterized protein LOC103506625 OS=Diaphorina citri OX=121845 GN=LOC103506625 PE=4 SV=1	1	3	3	1	31	15.089	70141	836490	354040	420224	389050	1059200	1054200	834150	0.503775	0.25981
A0A1S3CWH0	procollagen-lysine 5-dioxygenase	LOC103506550		tr|A0A1S3CWH0|A0A1S3CWH0_DIACI	tr|A0A1S3CWH0|A0A1S3CWH0_DIACI procollagen-lysine 5-dioxygenase OS=Diaphorina citri OX=121845 GN=LOC103506550 PE=4 SV=1	1	3	3	3	6.5	84.497	245280	78761	143600	155880	63574	26059	40580	43404.3	3.59135	0.086279
A0A1S3CWJ4	ATP synthase subunit beta, mitochondrial-like	LOC103506594		tr|A0A1S3CWJ4|A0A1S3CWJ4_DIACI	tr|A0A1S3CWJ4|A0A1S3CWJ4_DIACI ATP synthase subunit beta, mitochondrial-like OS=Diaphorina citri OX=121845 GN=LOC103506594 PE=3 SV=2	1	17	17	17	74.1	27.847	125340000	103540000	97732000	1.08871e+08	107980000	82990000	81201000	9.07237e+07	1.20002	0.206702
A0A1S3CWL7	Hsp90 co-chaperone Cdc37-like	LOC103506637		tr|A0A1S3CWL7|A0A1S3CWL7_DIACI;tr|A0A1S3DH02|A0A1S3DH02_DIACI	tr|A0A1S3CWL7|A0A1S3CWL7_DIACI Hsp90 co-chaperone Cdc37-like OS=Diaphorina citri OX=121845 GN=LOC103506637 PE=3 SV=1;tr|A0A1S3DH02|A0A1S3DH02_DIACI Hsp90 co-chaperone Cdc37-like OS=Diaphorina citri OX=121845 GN=LOC103517534 PE=3 SV=1	2	2	2	2	25.3	18.176		11102	8287.1	9694.55	11303	9416.5	70951	30556.8	0.317263	0.482613
A0A1S3CWP5	Venom acid phosphatase Acph-1-like	LOC103506681		tr|A0A1S3CWP5|A0A1S3CWP5_DIACI;tr|A0A3Q0IZB1|A0A3Q0IZB1_DIACI	tr|A0A1S3CWP5|A0A1S3CWP5_DIACI Venom acid phosphatase Acph-1-like OS=Diaphorina citri OX=121845 GN=LOC103506681 PE=4 SV=2;tr|A0A3Q0IZB1|A0A3Q0IZB1_DIACI Lysosomal acid phosphatase-like OS=Diaphorina citri OX=121845 GN=LOC113468687 PE=4 SV=1	2	2	2	2	5.3	50.195		4856	3637.2	4246.6	2951.6	58896	12799	24882.2	0.170668	0.422384
A0A1S3CWP8	Cysteine proteinase COT44-like	LOC103506723		tr|A0A1S3CWP8|A0A1S3CWP8_DIACI	tr|A0A1S3CWP8|A0A1S3CWP8_DIACI Cysteine proteinase COT44-like OS=Diaphorina citri OX=121845 GN=LOC103506723 PE=3 SV=1	1	8	4	4	67.3	18.22	3743300	2383700	3075100	3.06737e+06	3392900	2606900	1263400	2.42107e+06	1.26695	0.429024
A0A1S3CWR1	28S ribosomal protein S21, mitochondrial	LOC103506745		tr|A0A1S3CWR1|A0A1S3CWR1_DIACI	tr|A0A1S3CWR1|A0A1S3CWR1_DIACI 28S ribosomal protein S21, mitochondrial OS=Diaphorina citri OX=121845 GN=LOC103506745 PE=3 SV=1	1	1	1	1	13.8	10.381	23419	15971	19927	19772.3	19869	15762	16897	17509.3	1.12925	0.412352
A0A1S3CWU1	SH3 domain-binding glutamic acid-rich protein homolog isoform X1	LOC103506724		tr|A0A1S3CWU1|A0A1S3CWU1_DIACI	tr|A0A1S3CWU1|A0A1S3CWU1_DIACI SH3 domain-binding glutamic acid-rich protein homolog isoform X1 OS=Diaphorina citri OX=121845 GN=LOC103506724 PE=3 SV=1	1	2	2	2	20.2	14.408	741910	326310	376700	481640	598870	381350	231120	403780	1.19283	0.668843
A0A1S3CWU7	ADP-ribosylation factor-like protein 3	LOC103506065		tr|A0A1S3CWU7|A0A1S3CWU7_DIACI	tr|A0A1S3CWU7|A0A1S3CWU7_DIACI ADP-ribosylation factor-like protein 3 OS=Diaphorina citri OX=121845 GN=LOC103506065 PE=3 SV=1	1	6	6	6	48.2	24.794	594450	400890	393810	463050	477730	401370	414700	431267	1.0737	0.672577
A0A1S3CWV2	Prefoldin subunit 2	LOC103506804		tr|A0A1S3CWV2|A0A1S3CWV2_DIACI	tr|A0A1S3CWV2|A0A1S3CWV2_DIACI Prefoldin subunit 2 OS=Diaphorina citri OX=121845 GN=LOC103506804 PE=3 SV=1	1	3	3	3	29.2	16.251	313750	264110	271280	283047	321640	247560	230720	266640	1.06153	0.634502
A0A3Q0IMU6	Alkaline phosphatase	LOC103506767		tr|A0A3Q0IMU6|A0A3Q0IMU6_DIACI;tr|A0A1S3CWV3|A0A1S3CWV3_DIACI	tr|A0A3Q0IMU6|A0A3Q0IMU6_DIACI Alkaline phosphatase OS=Diaphorina citri OX=121845 GN=LOC103506767 PE=3 SV=1;tr|A0A1S3CWV3|A0A1S3CWV3_DIACI Alkaline phosphatase OS=Diaphorina citri OX=121845 GN=LOC103506767 PE=3 SV=1	2	6	6	6	23.2	48.822	96494	183670	135130	138431	93332	212540	271280	192384	0.719557	0.4057
A0A1S3CWV6	Phosphatidylinositol 4-phosphate 5-kinase type-1 alpha-like isoform X2	LOC103506746		tr|A0A1S3CWV6|A0A1S3CWV6_DIACI;tr|A0A1S4E8G8|A0A1S4E8G8_DIACI;tr|A0A1S3CY28|A0A1S3CY28_DIACI;tr|A0A1S4E8H7|A0A1S4E8H7_DIACI	tr|A0A1S3CWV6|A0A1S3CWV6_DIACI Phosphatidylinositol 4-phosphate 5-kinase type-1 alpha-like isoform X2 OS=Diaphorina citri OX=121845 GN=LOC103506746 PE=4 SV=1;tr|A0A1S4E8G8|A0A1S4E8G8_DIACI Phosphatidylinositol 4-phosphate 5-kinase type-1 alpha-like isoform	4	4	4	4	9.7	72.841	99712	76359	55653	77241.3	75769	103880	118530	99393	0.777131	0.282901
A0A1S3CWW9	Zinc finger CCCH domain-containing protein 11A-like	LOC103506837		tr|A0A1S3CWW9|A0A1S3CWW9_DIACI	tr|A0A1S3CWW9|A0A1S3CWW9_DIACI Zinc finger CCCH domain-containing protein 11A-like OS=Diaphorina citri OX=121845 GN=LOC103506837 PE=4 SV=1	1	2	2	2	22.5	14.986		75068	79347	77207.5	40652	99138	80711	73500.3	1.05044	0.878781
A0A1S3CWY8	EH domain-containing protein 1	LOC103506863		tr|A0A1S3CWY8|A0A1S3CWY8_DIACI	tr|A0A1S3CWY8|A0A1S3CWY8_DIACI EH domain-containing protein 1 OS=Diaphorina citri OX=121845 GN=LOC103506863 PE=4 SV=1	1	23	23	21	49.8	62.091	1917000	1377800	1406700	1.56717e+06	1324800	1445200	1398000	1.38933e+06	1.128	0.375709
A0A3Q0IN55	Protein no-on-transient A isoform X2	LOC103506883		tr|A0A3Q0IN55|A0A3Q0IN55_DIACI;tr|A0A1S3CWZ7|A0A1S3CWZ7_DIACI	tr|A0A3Q0IN55|A0A3Q0IN55_DIACI Protein no-on-transient A isoform X2 OS=Diaphorina citri OX=121845 GN=LOC103506883 PE=4 SV=1;tr|A0A1S3CWZ7|A0A1S3CWZ7_DIACI Protein no-on-transient A isoform X1 OS=Diaphorina citri OX=121845 GN=LOC103506883 PE=4 SV=1	2	3	3	3	11.4	51.697	3526.4	2686.8	9692.9	5302.03		92093	37666	64879.5	0.0817212	0.062067
A0A1S3CX17	Coatomer subunit zeta	LOC103506899	FUNCTION: The zeta subunit may be involved in regulating the coat assembly and, hence, the rate of biosynthetic protein transport due to its association-dissociation properties with the coatomer complex. {ECO:0000256|RuleBase:RU366053}.	tr|A0A1S3CX17|A0A1S3CX17_DIACI	tr|A0A1S3CX17|A0A1S3CX17_DIACI Coatomer subunit zeta OS=Diaphorina citri OX=121845 GN=LOC103506899 PE=3 SV=1	1	2	2	2	16.6	20.438	313420	2901100	3569200	2261240		673390	239970	456680	4.95148	0.256853
A0A1S3CX20	Vacuolar protein sorting-associated protein 13C	LOC103506921		tr|A0A1S3CX20|A0A1S3CX20_DIACI	tr|A0A1S3CX20|A0A1S3CX20_DIACI Vacuolar protein sorting-associated protein 13C OS=Diaphorina citri OX=121845 GN=LOC103506921 PE=4 SV=1	1	4	2	2	23	30.364	85516	60860	82086	76154	45323	73164	60761	59749.3	1.27456	0.215159
A0A1S3CX38	Glucose-6-phosphate 1-dehydrogenase	LOC103506864		tr|A0A1S3CX38|A0A1S3CX38_DIACI;tr|A0A1S3CYA5|A0A1S3CYA5_DIACI;tr|A0A1S3CWZ0|A0A1S3CWZ0_DIACI;tr|A0A1S4E8N2|A0A1S4E8N2_DIACI	tr|A0A1S3CX38|A0A1S3CX38_DIACI Glucose-6-phosphate 1-dehydrogenase OS=Diaphorina citri OX=121845 GN=LOC103506864 PE=4 SV=1;tr|A0A1S3CYA5|A0A1S3CYA5_DIACI Glucose-6-phosphate 1-dehydrogenase OS=Diaphorina citri OX=121845 GN=LOC103506864 PE=4 SV=1;tr|A0A1S3C	4	8	8	8	65.3	19.917	1311500	962660	903280	1.05915e+06	921030	994340	941940	952437	1.11204	0.455223
A0A1S3CX43	Glutathione-independent glyoxalase DJR-1.1-like	LOC103506956		tr|A0A1S3CX43|A0A1S3CX43_DIACI	tr|A0A1S3CX43|A0A1S3CX43_DIACI Glutathione-independent glyoxalase DJR-1.1-like OS=Diaphorina citri OX=121845 GN=LOC103506956 PE=4 SV=1	1	7	7	7	29.2	17.586	2293400	2499800	2312700	2.36863e+06	2486600	2061600	1851700	2133300	1.11031	0.300383
A0A1S3CX47	Pro-resilin-like	LOC103506880		tr|A0A1S3CX47|A0A1S3CX47_DIACI	tr|A0A1S3CX47|A0A1S3CX47_DIACI Pro-resilin-like OS=Diaphorina citri OX=121845 GN=LOC103506880 PE=4 SV=1	1	2	2	2	25.2	13.734	4081900	3427000	3249400	3586100	5377100	4157100	2785500	4.10657e+06	0.87326	0.546104
A0A1S3CX50	Thioredoxin, mitochondrial-like	LOC103506223		tr|A0A1S3CX50|A0A1S3CX50_DIACI	tr|A0A1S3CX50|A0A1S3CX50_DIACI Thioredoxin, mitochondrial-like OS=Diaphorina citri OX=121845 GN=LOC103506223 PE=4 SV=1	1	5	5	5	37.4	16.27	2411600	1741200	1723100	1.95863e+06	2240900	1487200	1329200	1.68577e+06	1.16187	0.491996
A0A1S3CX58	60S ribosomal protein L13	LOC103506989		tr|A0A1S3CX58|A0A1S3CX58_DIACI;tr|Q0PXV2|Q0PXV2_DIACI;tr|A0A1S4E977|A0A1S4E977_DIACI	tr|A0A1S3CX58|A0A1S3CX58_DIACI 60S ribosomal protein L13 OS=Diaphorina citri OX=121845 GN=LOC103506989 PE=3 SV=1;tr|Q0PXV2|Q0PXV2_DIACI 60S ribosomal protein L13 OS=Diaphorina citri OX=121845 GN=LOC103506989 PE=2 SV=1	3	6	6	6	24.4	25.395	2177700	1333000	1623300	1.71133e+06	1058800	1220200	1009000	1096000	1.56144	0.0739516
A0A1S3CX64	Adenylosuccinate lyase	LOC103506939		tr|A0A1S3CX64|A0A1S3CX64_DIACI	tr|A0A1S3CX64|A0A1S3CX64_DIACI Adenylosuccinate lyase OS=Diaphorina citri OX=121845 GN=LOC103506939 PE=4 SV=1	1	3	3	3	39.2	13.673	42747	87495	100850	77030.7	62356	64069	87275	71233.3	1.08139	0.779079
A0A1S3CX88	Cytochrome c	LOC103507048	FUNCTION: Electron carrier protein. The oxidized form of the cytochrome c heme group can accept an electron from the heme group of the cytochrome c1 subunit of cytochrome reductase. Cytochrome c then transfers this electron to the cytochrome oxidase complex, the final protein carrier in the mitochondrial electron-transport chain. {ECO:0000256|RuleBase:RU004427}.	tr|A0A1S3CX88|A0A1S3CX88_DIACI	tr|A0A1S3CX88|A0A1S3CX88_DIACI Cytochrome c OS=Diaphorina citri OX=121845 GN=LOC103507048 PE=3 SV=1	1	8	8	8	48.1	11.78	40743000	30640000	30513000	3.39653e+07	30235000	28085000	27261000	28527000	1.19064	0.195508
A0A1S3CX92	Troponin C-like	LOC103506300		tr|A0A1S3CX92|A0A1S3CX92_DIACI;tr|A0A1S4E804|A0A1S4E804_DIACI	tr|A0A1S3CX92|A0A1S3CX92_DIACI Troponin C-like OS=Diaphorina citri OX=121845 GN=LOC103506300 PE=4 SV=1;tr|A0A1S4E804|A0A1S4E804_DIACI Troponin C-like OS=Diaphorina citri OX=121845 GN=LOC108252022 PE=4 SV=1	2	8	8	7	64.7	17.754	11580000	10920000	9426700	1.06422e+07	10531000	8910300	7776300	9.07253e+06	1.17302	0.199387
A0A1S3CXA6	GTP cyclohydrolase 1	LOC103507006		tr|A0A1S3CXA6|A0A1S3CXA6_DIACI;tr|A0A1S4E987|A0A1S4E987_DIACI	tr|A0A1S3CXA6|A0A1S3CXA6_DIACI GTP cyclohydrolase 1 OS=Diaphorina citri OX=121845 GN=LOC103507006 PE=3 SV=1;tr|A0A1S4E987|A0A1S4E987_DIACI GTP cyclohydrolase 1 OS=Diaphorina citri OX=121845 GN=LOC103507006 PE=3 SV=1	2	6	6	6	39.6	26.755	418550	104230	521080	347953	68160	100770	9501.7	59477.2	5.85019	0.0876524
A0A1S3CXA8	Uncharacterized protein LOC103507066 isoform X1	LOC103507066		tr|A0A1S3CXA8|A0A1S3CXA8_DIACI	tr|A0A1S3CXA8|A0A1S3CXA8_DIACI Uncharacterized protein LOC103507066 isoform X1 OS=Diaphorina citri OX=121845 GN=LOC103507066 PE=4 SV=1	1	4	4	4	23.3	21.378	307000	568890	493640	456510	764380	606890	1250500	873923	0.522368	0.116181
A0A1S3CXA9	Uncharacterized protein LOC103507057	LOC103507057		tr|A0A1S3CXA9|A0A1S3CXA9_DIACI	tr|A0A1S3CXA9|A0A1S3CXA9_DIACI Uncharacterized protein LOC103507057 OS=Diaphorina citri OX=121845 GN=LOC103507057 PE=4 SV=1	1	1	1	1	10.1	15.699	138290	110620		124455	111600	76381	87573	91851.3	1.35496	0.149593
A0A1S3CXB4	Uncharacterized protein LOC103507065	LOC103507065		tr|A0A1S3CXB4|A0A1S3CXB4_DIACI	tr|A0A1S3CXB4|A0A1S3CXB4_DIACI Uncharacterized protein LOC103507065 OS=Diaphorina citri OX=121845 GN=LOC103507065 PE=4 SV=1	1	2	2	2	12.3	17.463		53219	60858	57038.5	59170	80079	57900	65716.3	0.86795	0.437325
A0A1S3CXC2	Longitudinals lacking protein, isoforms H/M/V	LOC103507032		tr|A0A1S3CXC2|A0A1S3CXC2_DIACI;tr|A0A1S3D2G6|A0A1S3D2G6_DIACI	tr|A0A1S3CXC2|A0A1S3CXC2_DIACI Longitudinals lacking protein, isoforms H/M/V OS=Diaphorina citri OX=121845 GN=LOC103507032 PE=4 SV=1;tr|A0A1S3D2G6|A0A1S3D2G6_DIACI Longitudinals lacking protein, isoforms H/M/V OS=Diaphorina citri OX=121845 GN=LOC103510069	2	4	4	3	47.1	17.843	425040	319400	377900	374113	304320	354840	260650	306603	1.22019	0.174301
A0A1S3CXD3	Innexin	LOC103507053	FUNCTION: Structural component of the gap junctions. {ECO:0000256|RuleBase:RU010713}.	tr|A0A1S3CXD3|A0A1S3CXD3_DIACI	tr|A0A1S3CXD3|A0A1S3CXD3_DIACI Innexin OS=Diaphorina citri OX=121845 GN=LOC103507053 PE=3 SV=1	1	2	2	2	5.9	44.959	69212	138460	91502	99724.7	103020	201710	142940	149223	0.668291	0.232229
A0A1S3CXD9	Proteasome activator complex subunit 3	LOC103507118		tr|A0A1S3CXD9|A0A1S3CXD9_DIACI;tr|A0A1S3CXH8|A0A1S3CXH8_DIACI	tr|A0A1S3CXD9|A0A1S3CXD9_DIACI Proteasome activator complex subunit 3 OS=Diaphorina citri OX=121845 GN=LOC103507118 PE=3 SV=1;tr|A0A1S3CXH8|A0A1S3CXH8_DIACI Proteasome activator complex subunit 3-like OS=Diaphorina citri OX=121845 GN=LOC108251833 PE=3 SV=1	2	4	4	4	25.4	27.752	47128	70782	54620	57510	49711	113190	12633	58511.3	0.982887	0.97512
A0A1S3CYN7	Transmembrane protein 70 homolog, mitochondrial	LOC103507080		tr|A0A1S3CYN7|A0A1S3CYN7_DIACI;tr|A0A1S3CXG5|A0A1S3CXG5_DIACI	tr|A0A1S3CYN7|A0A1S3CYN7_DIACI Transmembrane protein 70 homolog, mitochondrial OS=Diaphorina citri OX=121845 GN=LOC103507080 PE=3 SV=1;tr|A0A1S3CXG5|A0A1S3CXG5_DIACI Transmembrane protein 70 homolog, mitochondrial OS=Diaphorina citri OX=121845 GN=LOC103507	2	1	1	1	8.6	24.997		22560	13602	18081		16467	14066	15266.5	1.18436	0.605608
A0A1S3CXL1	Uncharacterized protein LOC103507166 isoform X3	LOC103507166		tr|A0A1S3CXL1|A0A1S3CXL1_DIACI;tr|A0A3Q0INV2|A0A3Q0INV2_DIACI;tr|A0A1S3CXH2|A0A1S3CXH2_DIACI	tr|A0A1S3CXL1|A0A1S3CXL1_DIACI Uncharacterized protein LOC103507166 isoform X3 OS=Diaphorina citri OX=121845 GN=LOC103507166 PE=4 SV=1;tr|A0A3Q0INV2|A0A3Q0INV2_DIACI Uncharacterized protein LOC103507166 isoform X2 OS=Diaphorina citri OX=121845 GN=LOC103507	3	2	2	2	12.5	27.842	111350	74745	69223	85106	55206	50917	39416	48513	1.75429	0.0595778
A0A1S3CXK7	Proteasome subunit beta	LOC103507227		tr|A0A1S3CXK7|A0A1S3CXK7_DIACI	tr|A0A1S3CXK7|A0A1S3CXK7_DIACI Proteasome subunit beta OS=Diaphorina citri OX=121845 GN=LOC103507227 PE=3 SV=1	1	8	8	8	48.1	25.214	705030	987560	1099300	930630	962840	856390	820570	879933	1.05761	0.705501
A0A1S3CXM8	Eukaryotic translation initiation factor 3 subunit B-like	LOC103506534		tr|A0A1S3CXM8|A0A1S3CXM8_DIACI;tr|A0A3Q0IQV8|A0A3Q0IQV8_DIACI;tr|A0A1S3DS18|A0A1S3DS18_DIACI	tr|A0A1S3CXM8|A0A1S3CXM8_DIACI Eukaryotic translation initiation factor 3 subunit B-like OS=Diaphorina citri OX=121845 GN=LOC103506534 PE=4 SV=1;tr|A0A3Q0IQV8|A0A3Q0IQV8_DIACI Eukaryotic translation initiation factor 3 subunit B-like OS=Diaphorina citri OX	3	4	4	4	39	19.733	419010	185710	252580	285767	130970	118650	150600	133407	2.14207	0.0950524
A0A1S3CXN0	Uncharacterized protein LOC103507204	LOC103507204		tr|A0A1S3CXN0|A0A1S3CXN0_DIACI	tr|A0A1S3CXN0|A0A1S3CXN0_DIACI Uncharacterized protein LOC103507204 OS=Diaphorina citri OX=121845 GN=LOC103507204 PE=4 SV=2	1	2	2	2	3.2	85.929	255540	28700	39248	107829	62174	56734		59454	1.81366	0.647187
A0A1S3CXN2	Succinate dehydrogenase cytochrome b560 subunit, mitochondrial-like	LOC103507211		tr|A0A1S3CXN2|A0A1S3CXN2_DIACI	tr|A0A1S3CXN2|A0A1S3CXN2_DIACI Succinate dehydrogenase cytochrome b560 subunit, mitochondrial-like OS=Diaphorina citri OX=121845 GN=LOC103507211 PE=4 SV=2	1	3	3	3	16.9	15.886	562550	350940	325250	412913	181470	228040	228780	212763	1.94072	0.0596546
A0A1S3CXP2	Proteasome subunit alpha type	LOC103507226	FUNCTION: The proteasome is a multicatalytic proteinase complex which is characterized by its ability to cleave peptides with Arg, Phe, Tyr, Leu, and Glu adjacent to the leaving group at neutral or slightly basic pH. {ECO:0000256|RuleBase:RU000551}.	tr|A0A1S3CXP2|A0A1S3CXP2_DIACI	tr|A0A1S3CXP2|A0A1S3CXP2_DIACI Proteasome subunit alpha type OS=Diaphorina citri OX=121845 GN=LOC103507226 PE=3 SV=1	1	11	11	11	62.6	28.214	880350	1956400	1968800	1601850	2426000	2205700	1856300	2.16267e+06	0.740683	0.230695
A0A1S3CXR6	Phosphatidylinositol 5-phosphate 4-kinase type-2 alpha	LOC103507318		tr|A0A1S3CXR6|A0A1S3CXR6_DIACI;tr|A0A1S3DIE5|A0A1S3DIE5_DIACI;tr|A0A3Q0JHM5|A0A3Q0JHM5_DIACI	tr|A0A1S3CXR6|A0A1S3CXR6_DIACI Phosphatidylinositol 5-phosphate 4-kinase type-2 alpha OS=Diaphorina citri OX=121845 GN=LOC103507318 PE=4 SV=2;tr|A0A1S3DIE5|A0A1S3DIE5_DIACI Phosphatidylinositol 5-phosphate 4-kinase type-2 alpha OS=Diaphorina citri OX=12184	3	8	8	8	21.5	54.515	746260	411240	423970	527157	423470	589380	542540	518463	1.01677	0.945827
A0A1S3CXR9	Uncharacterized protein DDB_G0283357-like	LOC103507263		tr|A0A1S3CXR9|A0A1S3CXR9_DIACI	tr|A0A1S3CXR9|A0A1S3CXR9_DIACI Uncharacterized protein DDB_G0283357-like OS=Diaphorina citri OX=121845 GN=LOC103507263 PE=4 SV=1	1	2	2	2	16.7	32.32	116520	213660	153210	161130	297640	158210	204710	220187	0.731788	0.301464
A0A1S3CXS3	Charged multivesicular body protein 4c isoform X1	LOC103507316		tr|A0A1S3CXS3|A0A1S3CXS3_DIACI	tr|A0A1S3CXS3|A0A1S3CXS3_DIACI Charged multivesicular body protein 4c isoform X1 OS=Diaphorina citri OX=121845 GN=LOC103507316 PE=3 SV=1	1	7	7	7	54.3	24.876	868400	607920	676160	717493	1496400	889790	696480	1.02756e+06	0.698252	0.288045
A0A1S3CXT5	Cold shock domain-containing protein CG9705-like	LOC103507296		tr|A0A1S3CXT5|A0A1S3CXT5_DIACI	tr|A0A1S3CXT5|A0A1S3CXT5_DIACI Cold shock domain-containing protein CG9705-like OS=Diaphorina citri OX=121845 GN=LOC103507296 PE=4 SV=1	1	2	2	2	41.4	15.537	78242	94141	74378	82253.7	462370	111060	91314	221581	0.371212	0.312568
A0A1S3CXT6	Tyrosine-protein phosphatase non-receptor type 2-like	LOC103506615		tr|A0A1S3CXT6|A0A1S3CXT6_DIACI	tr|A0A1S3CXT6|A0A1S3CXT6_DIACI Tyrosine-protein phosphatase non-receptor type 2-like OS=Diaphorina citri OX=121845 GN=LOC103506615 PE=3 SV=1	1	2	2	2	5.8	52.955	26728	30947	36373	31349.3	14244	31285	29033	24854	1.26134	0.342019
A0A1S3CXU1	V-type proton ATPase subunit D	LOC103507362		tr|A0A1S3CXU1|A0A1S3CXU1_DIACI	tr|A0A1S3CXU1|A0A1S3CXU1_DIACI V-type proton ATPase subunit D OS=Diaphorina citri OX=121845 GN=LOC103507362 PE=3 SV=1	1	9	9	9	51.4	27.721	1824700	1178300	1307900	1.43697e+06	999040	942610	999280	980310	1.46583	0.0827224
A0A1S3CXV3	Phospholipid scramblase	LOC103507317	FUNCTION: May mediate accelerated ATP-independent bidirectional transbilayer migration of phospholipids upon binding calcium ions that results in a loss of phospholipid asymmetry in the plasma membrane. {ECO:0000256|RuleBase:RU363116}.	tr|A0A1S3CXV3|A0A1S3CXV3_DIACI	tr|A0A1S3CXV3|A0A1S3CXV3_DIACI Phospholipid scramblase OS=Diaphorina citri OX=121845 GN=LOC103507317 PE=3 SV=1	1	4	4	4	17.4	26.294	387330	690470	7259800	2779200	886220	906370	648820	813803	3.41508	0.430472
A0A1S3CXW6	ATP synthase-coupling factor 6, mitochondrial	LOC103507338	FUNCTION: Mitochondrial membrane ATP synthase (F(1)F(0) ATP synthase or Complex V) produces ATP from ADP in the presence of a proton gradient across the membrane which is generated by electron transport complexes of the respiratory chain. {ECO:0000256|PIRNR:PIRNR002455}.	tr|A0A1S3CXW6|A0A1S3CXW6_DIACI;tr|A0A3Q0IP69|A0A3Q0IP69_DIACI	tr|A0A1S3CXW6|A0A1S3CXW6_DIACI ATP synthase-coupling factor 6, mitochondrial OS=Diaphorina citri OX=121845 GN=LOC103507338 PE=3 SV=1;tr|A0A3Q0IP69|A0A3Q0IP69_DIACI ATP synthase-coupling factor 6, mitochondrial OS=Diaphorina citri OX=121845 GN=LOC103507341	2	3	3	3	31.1	11.921	21176000	14060000	12927000	1.60543e+07	17536000	11766000	11636000	13646000	1.17649	0.497648
A0A1S3CXW7	Multiple inositol polyphosphate phosphatase 1-like	LOC103506667		tr|A0A1S3CXW7|A0A1S3CXW7_DIACI	tr|A0A1S3CXW7|A0A1S3CXW7_DIACI Multiple inositol polyphosphate phosphatase 1-like OS=Diaphorina citri OX=121845 GN=LOC103506667 PE=4 SV=1	1	2	2	2	13.4	20.291	118320	99679	100220	106073	125420	71613	92470	96501	1.09919	0.599692
A0A1S3CXX8	Transcription factor BTF3	LOC103507363		tr|A0A1S3CXX8|A0A1S3CXX8_DIACI;tr|Q0PXU9|Q0PXU9_DIACI	tr|A0A1S3CXX8|A0A1S3CXX8_DIACI Transcription factor BTF3 OS=Diaphorina citri OX=121845 GN=LOC103507363 PE=3 SV=1;tr|Q0PXU9|Q0PXU9_DIACI Transcription factor BTF3 OS=Diaphorina citri OX=121845 PE=2 SV=1	2	8	8	8	60.8	20.458	1122400	1710900	1553900	1462400	1968000	1385600	1215100	1522900	0.960273	0.843844
A0A1S3CXY6	lactoylglutathione lyase	LOC103507437		tr|A0A1S3CXY6|A0A1S3CXY6_DIACI	tr|A0A1S3CXY6|A0A1S3CXY6_DIACI lactoylglutathione lyase OS=Diaphorina citri OX=121845 GN=LOC103507437 PE=3 SV=1	1	7	7	7	64.3	20.686	1103200	682640	722540	836127	888150	840990	575740	768293	1.08829	0.703049
A0A1S3CY07	Regulator of microtubule dynamics protein 1 isoform X1	LOC103506718		tr|A0A1S3CY07|A0A1S3CY07_DIACI	tr|A0A1S3CY07|A0A1S3CY07_DIACI Regulator of microtubule dynamics protein 1 isoform X1 OS=Diaphorina citri OX=121845 GN=LOC103506718 PE=4 SV=1	1	6	6	6	23.6	36.695	355820	354200	314270	341430	455310	385400	361030	400580	0.852339	0.132266
A0A1S3CY29	H(+)-transporting two-sector ATPase	LOC103507511		tr|A0A1S3CY29|A0A1S3CY29_DIACI	tr|A0A1S3CY29|A0A1S3CY29_DIACI H(+)-transporting two-sector ATPase OS=Diaphorina citri OX=121845 GN=LOC103507511 PE=3 SV=1	1	38	38	38	78.5	68.242	28414000	22602000	23312000	24776000	20713000	19704000	20310000	2.02423e+07	1.22397	0.0707842
A0A1S3CY39	Probable 4-aminobutyrate aminotransferase, mitochondrial	LOC103507520		tr|A0A1S3CY39|A0A1S3CY39_DIACI	tr|A0A1S3CY39|A0A1S3CY39_DIACI Probable 4-aminobutyrate aminotransferase, mitochondrial OS=Diaphorina citri OX=121845 GN=LOC103507520 PE=3 SV=1	1	4	4	4	56.3	19.871	860470	845650	754740	820287	608510	767300	992660	789490	1.03901	0.804158
A0A1S3CY47	Lissencephaly-1 homolog	LOC103507528	FUNCTION: Positively regulates the activity of the minus-end directed microtubule motor protein dynein. May enhance dynein-mediated microtubule sliding by targeting dynein to the microtubule plus end. Required for several dynein- and microtubule-dependent processes. {ECO:0000256|HAMAP-Rule:MF_03141}.	tr|A0A1S3CY47|A0A1S3CY47_DIACI	tr|A0A1S3CY47|A0A1S3CY47_DIACI Lissencephaly-1 homolog OS=Diaphorina citri OX=121845 GN=LOC103507528 PE=3 SV=1	1	7	7	7	30.4	45.539	583490	527120	573950	561520	310010	777750	451760	513173	1.09421	0.746488
A0A1S3CZH0	Trafficking protein particle complex subunit 2-like protein	LOC103507539		tr|A0A1S3CZH0|A0A1S3CZH0_DIACI;tr|A0A1S3CY52|A0A1S3CY52_DIACI	tr|A0A1S3CZH0|A0A1S3CZH0_DIACI Trafficking protein particle complex subunit 2-like protein OS=Diaphorina citri OX=121845 GN=LOC103507539 PE=3 SV=1;tr|A0A1S3CY52|A0A1S3CY52_DIACI Trafficking protein particle complex subunit 2-like protein OS=Diaphorina citr	2	1	1	1	16.3	9.7929		23879	14611	19245	3599.4	25682	19734	16338.5	1.1779	0.772532
A0A1S3CY59	Sarcalumenin	LOC103507509		tr|A0A1S3CY59|A0A1S3CY59_DIACI	tr|A0A1S3CY59|A0A1S3CY59_DIACI Sarcalumenin OS=Diaphorina citri OX=121845 GN=LOC103507509 PE=4 SV=1	1	20	20	20	35.3	87.033	6271100	4741400	4956800	5323100	4114800	3884400	3975300	3991500	1.33361	0.0509302
A0A1S3CYA2	RNA-binding protein squid isoform X4	LOC103507559		tr|A0A1S3CYA2|A0A1S3CYA2_DIACI;tr|A0A1S3CY71|A0A1S3CY71_DIACI;tr|A0A1S3CY67|A0A1S3CY67_DIACI	tr|A0A1S3CYA2|A0A1S3CYA2_DIACI RNA-binding protein squid isoform X4 OS=Diaphorina citri OX=121845 GN=LOC103507559 PE=4 SV=1;tr|A0A1S3CY71|A0A1S3CY71_DIACI RNA-binding protein squid isoform X3 OS=Diaphorina citri OX=121845 GN=LOC103507559 PE=4 SV=1;tr|A0A1S	3	9	9	9	39.7	29.942	658450	1564700	1865300	1.36282e+06	1652400	1839900	1135900	1.54273e+06	0.883378	0.690007
A0A1S3CY85	Uncharacterized protein LOC103507527	LOC103507527		tr|A0A1S3CY85|A0A1S3CY85_DIACI	tr|A0A1S3CY85|A0A1S3CY85_DIACI Uncharacterized protein LOC103507527 OS=Diaphorina citri OX=121845 GN=LOC103507527 PE=4 SV=1	1	1	1	1	1.1	166.83	38347	27263	41289	35633	34122	31919	16161	27400.7	1.30044	0.309972
A0A1S3CYB2	UDP-glucuronosyltransferase 2B31-like	LOC103507578		tr|A0A1S3CYB2|A0A1S3CYB2_DIACI	tr|A0A1S3CYB2|A0A1S3CYB2_DIACI UDP-glucuronosyltransferase 2B31-like OS=Diaphorina citri OX=121845 GN=LOC103507578 PE=4 SV=1	1	7	7	7	22.8	59.382	474030	273030	316250	354437	199670	216880	219540	212030	1.67163	0.0812001
A0A1S3CYC2	Large ribosomal subunit protein mL53	LOC103507600		tr|A0A1S3CYC2|A0A1S3CYC2_DIACI	tr|A0A1S3CYC2|A0A1S3CYC2_DIACI Large ribosomal subunit protein mL53 OS=Diaphorina citri OX=121845 GN=LOC103507600 PE=3 SV=1	1	1	1	1	9.3	15.711	7061.2	24626	31153	20946.7	21001	17747	19936	19561.3	1.07082	0.857905
A0A3Q0IPQ9	FAD-dependent oxidoreductase domain-containing protein 1-like isoform X1	LOC103507641		tr|A0A3Q0IPQ9|A0A3Q0IPQ9_DIACI;tr|A0A1S3CYC5|A0A1S3CYC5_DIACI;tr|A0A3Q0IUE4|A0A3Q0IUE4_DIACI	tr|A0A3Q0IPQ9|A0A3Q0IPQ9_DIACI FAD-dependent oxidoreductase domain-containing protein 1-like isoform X1 OS=Diaphorina citri OX=121845 GN=LOC103507641 PE=4 SV=1;tr|A0A1S3CYC5|A0A1S3CYC5_DIACI FAD-dependent oxidoreductase domain-containing protein 1-like iso	3	6	6	6	14.7	64.15	370080	248810	263460	294117	245470	199500	197600	214190	1.37316	0.125032
A0A1S3CYD2	Thioredoxin-like protein 1	LOC103507655		tr|A0A1S3CYD2|A0A1S3CYD2_DIACI	tr|A0A1S3CYD2|A0A1S3CYD2_DIACI Thioredoxin-like protein 1 OS=Diaphorina citri OX=121845 GN=LOC103507655 PE=4 SV=1	1	6	6	6	33.8	31.71	829080	740230	667890	745733	863880	582270	561700	669283	1.11423	0.518278
A0A1S3CYD5	Pancreatic triacylglycerol lipase-like	LOC103507659		tr|A0A1S3CYD5|A0A1S3CYD5_DIACI	tr|A0A1S3CYD5|A0A1S3CYD5_DIACI Pancreatic triacylglycerol lipase-like OS=Diaphorina citri OX=121845 GN=LOC103507659 PE=3 SV=2	1	3	3	3	6	88.743	499030	1103000	961170	854400	1212900	1237200	1758100	1.40273e+06	0.609097	0.0976619
A0A1S3CYD8	CTP synthase (glutamine hydrolyzing)	LOC103506917		tr|A0A1S3CYD8|A0A1S3CYD8_DIACI	tr|A0A1S3CYD8|A0A1S3CYD8_DIACI CTP synthase (glutamine hydrolyzing) OS=Diaphorina citri OX=121845 GN=LOC103506917 PE=3 SV=1	1	2	2	2	12.1	33.081	8659.5	68479	98672	58603.5	72810	78792	82155	77919	0.752108	0.507813
A0A1S3CYF4	Calcium load-activated calcium channel	LOC103507642	FUNCTION: Calcium-selective channel required to prevent calcium stores from overfilling. {ECO:0000256|PIRNR:PIRNR023322}.	tr|A0A1S3CYF4|A0A1S3CYF4_DIACI	tr|A0A1S3CYF4|A0A1S3CYF4_DIACI Calcium load-activated calcium channel OS=Diaphorina citri OX=121845 GN=LOC103507642 PE=3 SV=1	1	2	2	2	13.7	20.805	935120	361990	473540	590217	327460	282940	69314	226571	2.60499	0.132156
A0A1S3CYF9	Chorion class high-cysteine HCB protein 13-like	LOC103507681		tr|A0A1S3CYF9|A0A1S3CYF9_DIACI	tr|A0A1S3CYF9|A0A1S3CYF9_DIACI Chorion class high-cysteine HCB protein 13-like OS=Diaphorina citri OX=121845 GN=LOC103507681 PE=4 SV=1	1	4	4	4	72.1	10.596	224490	1496800	840410	853900	1866100	1537300	2166600	1.85667e+06	0.45991	0.070693
A0A1S3CYJ0	Dynein light chain	LOC103507755		tr|A0A1S3CYJ0|A0A1S3CYJ0_DIACI	tr|A0A1S3CYJ0|A0A1S3CYJ0_DIACI Dynein light chain OS=Diaphorina citri OX=121845 GN=LOC103507755 PE=3 SV=1	1	4	4	4	67.4	10.374	443820	629160	668570	580517	346850	559220	536250	480773	1.20746	0.360093
A0A1S3CYJ4	Ras-related protein Rab-35	LOC103507763		tr|A0A1S3CYJ4|A0A1S3CYJ4_DIACI	tr|A0A1S3CYJ4|A0A1S3CYJ4_DIACI Ras-related protein Rab-35 OS=Diaphorina citri OX=121845 GN=LOC103507763 PE=4 SV=1	1	2	2	2	31.4	11.83	44317	41011	49689	45005.7	25762	43328	65429	44839.7	1.0037	0.989406
A0A1S3CYJ8	ER membrane protein complex subunit 3	LOC103507773		tr|A0A1S3CYJ8|A0A1S3CYJ8_DIACI;tr|A0A1S3CYQ5|A0A1S3CYQ5_DIACI	tr|A0A1S3CYJ8|A0A1S3CYJ8_DIACI ER membrane protein complex subunit 3 OS=Diaphorina citri OX=121845 GN=LOC103507773 PE=3 SV=1;tr|A0A1S3CYQ5|A0A1S3CYQ5_DIACI ER membrane protein complex subunit 3 OS=Diaphorina citri OX=121845 GN=LOC103507776 PE=3 SV=1	2	2	2	2	12.8	27.421	75726	64383	67699	69269.3	53669	61108	4633.6	39803.5	1.74028	0.177595
A0A1S3CYK1	Diamine acetyltransferase 2 isoform X4	LOC103507027		tr|A0A1S3CYK1|A0A1S3CYK1_DIACI;tr|A0A3Q0INC5|A0A3Q0INC5_DIACI;tr|A0A1S4E9A1|A0A1S4E9A1_DIACI;tr|A0A3Q0ITX0|A0A3Q0ITX0_DIACI	tr|A0A1S3CYK1|A0A1S3CYK1_DIACI Diamine acetyltransferase 2 isoform X4 OS=Diaphorina citri OX=121845 GN=LOC103507027 PE=4 SV=1;tr|A0A3Q0INC5|A0A3Q0INC5_DIACI Diamine acetyltransferase 2 isoform X1 OS=Diaphorina citri OX=121845 GN=LOC103507027 PE=4 SV=1;tr|A	4	3	3	3	30.9	18.644	280120	374210	82301	245544	188510	264040	168850	207133	1.18544	0.693979
A0A1S3CYL5	Piwi-like protein Ago3	LOC103507780		tr|A0A1S3CYL5|A0A1S3CYL5_DIACI	tr|A0A1S3CYL5|A0A1S3CYL5_DIACI Piwi-like protein Ago3 OS=Diaphorina citri OX=121845 GN=LOC103507780 PE=3 SV=1	1	3	3	3	5.4	99.874	31576	21603	26130	26436.3	17408	26558	17169	20378.3	1.29728	0.225057
A0A3Q0IQ79	NAD(+) kinase	LOC103507804		tr|A0A3Q0IQ79|A0A3Q0IQ79_DIACI;tr|A0A1S3CYM6|A0A1S3CYM6_DIACI;tr|A0A1S3CYQ9|A0A1S3CYQ9_DIACI;tr|A0A1S3CYT3|A0A1S3CYT3_DIACI;tr|A0A1S3CYN8|A0A1S3CYN8_DIACI;tr|A0A1S3CYM1|A0A1S3CYM1_DIACI;tr|A0A3Q0IQ14|A0A3Q0IQ14_DIACI;tr|A0A1S3CZZ4|A0A1S3CZZ4_DIACI;tr|A0A1S3CYQ4|A0A1S3CYQ4_DIACI;tr|A0A1S3CYS8|A0A1S3CYS8_DIACI;tr|A0A1S3CYN3|A0A1S3CYN3_DIACI;tr|A0A1S3CYL6|A0A1S3CYL6_DIACI	tr|A0A3Q0IQ79|A0A3Q0IQ79_DIACI NAD(+) kinase OS=Diaphorina citri OX=121845 GN=LOC103507804 PE=3 SV=1;tr|A0A1S3CYM6|A0A1S3CYM6_DIACI NAD(+) kinase OS=Diaphorina citri OX=121845 GN=LOC103507804 PE=3 SV=1;tr|A0A1S3CYQ9|A0A1S3CYQ9_DIACI NAD(+) kinase OS=Diapho	12	1	1	1	4.1	43.444	200920	55922	59712	105518		121850	31252	76551	1.3784	0.707763
A0A1S3CYN9	Uncharacterized protein LOC103507787	LOC103507787		tr|A0A1S3CYN9|A0A1S3CYN9_DIACI	tr|A0A1S3CYN9|A0A1S3CYN9_DIACI Uncharacterized protein LOC103507787 OS=Diaphorina citri OX=121845 GN=LOC103507787 PE=4 SV=1	1	4	4	4	23.3	21.843	1832300	1663500	4448500	2648100	3029000	866420	5491600	3.12901e+06	0.846307	0.780282
A0A1S3CYP5	Vacuolar protein sorting-associated protein 37C isoform X1	LOC103507756		tr|A0A1S3CYP5|A0A1S3CYP5_DIACI	tr|A0A1S3CYP5|A0A1S3CYP5_DIACI Vacuolar protein sorting-associated protein 37C isoform X1 OS=Diaphorina citri OX=121845 GN=LOC103507756 PE=3 SV=1	1	2	2	2	12.8	26.124	174690	1305.5	2830.3	59608.6	166190	107010	112980	128727	0.463063	0.317279
A0A1S3CYP9	Transferrin-like	LOC103507801		tr|A0A1S3CYP9|A0A1S3CYP9_DIACI	tr|A0A1S3CYP9|A0A1S3CYP9_DIACI Transferrin-like OS=Diaphorina citri OX=121845 GN=LOC103507801 PE=4 SV=1	1	13	2	2	59.9	31.514	321620	1935600	1961000	1.40607e+06	257470	1316500	934140	836037	1.68183	0.412955
A0A1S3CYQ0	Ras-related protein Rab-35-like	LOC103507764		tr|A0A1S3CYQ0|A0A1S3CYQ0_DIACI	tr|A0A1S3CYQ0|A0A1S3CYQ0_DIACI Ras-related protein Rab-35-like OS=Diaphorina citri OX=121845 GN=LOC103507764 PE=4 SV=1	1	1	1	1	11.7	13.688	11908	22193	43972	26024.3	8061.2	32278	34754	25031.1	1.03968	0.941518
A0A1S3CYR1	ADP-ribosylation factor 6	LOC103507122		tr|A0A1S3CYR1|A0A1S3CYR1_DIACI	tr|A0A1S3CYR1|A0A1S3CYR1_DIACI ADP-ribosylation factor 6 OS=Diaphorina citri OX=121845 GN=LOC103507122 PE=3 SV=1	1	4	4	4	34.9	20.142	217330	164290	160610	180743	109360	144520	162800	138893	1.30131	0.157716
A0A1S3CYS1	Proline-rich proteoglycan 2-like	LOC103507857		tr|A0A1S3CYS1|A0A1S3CYS1_DIACI	tr|A0A1S3CYS1|A0A1S3CYS1_DIACI Proline-rich proteoglycan 2-like OS=Diaphorina citri OX=121845 GN=LOC103507857 PE=4 SV=1	1	2	2	2	8.5	37.844	12443	23402	46093	27312.7	34595	47434	31000	37676.3	0.724929	0.403079
A0A1S4ERK7	Uncharacterized protein LOC103523797	LOC103523797		tr|A0A1S4ERK7|A0A1S4ERK7_DIACI;tr|A0A1S3CYT5|A0A1S3CYT5_DIACI	tr|A0A1S4ERK7|A0A1S4ERK7_DIACI Uncharacterized protein LOC103523797 OS=Diaphorina citri OX=121845 GN=LOC103523797 PE=4 SV=1;tr|A0A1S3CYT5|A0A1S3CYT5_DIACI Uncharacterized protein LOC103507178 isoform X1 OS=Diaphorina citri OX=121845 GN=LOC103507178 PE=4 SV	2	1	1	1	5.4	41.895	4687200		3019400	3853300	2575200	2155200	8046.3	1.57948e+06	2.4396	0.154389
A0A3Q0IVQ9	Uncharacterized protein LOC103507921 isoform X2	LOC103507921		tr|A0A3Q0IVQ9|A0A3Q0IVQ9_DIACI;tr|A0A1S3CYV6|A0A1S3CYV6_DIACI	tr|A0A3Q0IVQ9|A0A3Q0IVQ9_DIACI Uncharacterized protein LOC103507921 isoform X2 OS=Diaphorina citri OX=121845 GN=LOC103507921 PE=4 SV=1;tr|A0A1S3CYV6|A0A1S3CYV6_DIACI Uncharacterized protein LOC103507921 isoform X1 OS=Diaphorina citri OX=121845 GN=LOC103507	2	9	9	9	73.7	16.089	1423700	1542000	1720100	1.56193e+06	2723700	2122000	1889700	2.24513e+06	0.695697	0.0601983
A0A1S3CYX4	Protein phosphatase 1 regulatory subunit 7	LOC103507907		tr|A0A1S3CYX4|A0A1S3CYX4_DIACI	tr|A0A1S3CYX4|A0A1S3CYX4_DIACI Protein phosphatase 1 regulatory subunit 7 OS=Diaphorina citri OX=121845 GN=LOC103507907 PE=4 SV=1	1	5	5	5	16.4	40.01	273790	166790	209880	216820	259890	155110	162450	192483	1.12644	0.624011
A0A1S3CYY1	DDB1- and CUL4-associated factor 7	LOC103507876		tr|A0A1S3CYY1|A0A1S3CYY1_DIACI	tr|A0A1S3CYY1|A0A1S3CYY1_DIACI DDB1- and CUL4-associated factor 7 OS=Diaphorina citri OX=121845 GN=LOC103507876 PE=4 SV=1	1	4	4	4	18	39.362	100050	250600	338530	229727	506970	423160	249260	393130	0.584353	0.187815
A0A3Q0IQF5	eIF-4F 25 kDa subunit	LOC103508014		tr|A0A3Q0IQF5|A0A3Q0IQF5_DIACI;tr|A0A1S3CZ14|A0A1S3CZ14_DIACI;tr|A0A3Q0IV50|A0A3Q0IV50_DIACI	tr|A0A3Q0IQF5|A0A3Q0IQF5_DIACI eIF-4F 25 kDa subunit OS=Diaphorina citri OX=121845 GN=LOC103508014 PE=3 SV=1;tr|A0A1S3CZ14|A0A1S3CZ14_DIACI eIF-4F 25 kDa subunit OS=Diaphorina citri OX=121845 GN=LOC103508014 PE=3 SV=1;tr|A0A3Q0IV50|A0A3Q0IV50_DIACI eIF-4F	3	7	7	7	55.9	21.493	554480	472040	533980	520167	339290	521890	409340	423507	1.22824	0.174828
A0A1S3CZ45	Uncharacterized protein LOC103508016	LOC103508016		tr|A0A1S3CZ45|A0A1S3CZ45_DIACI	tr|A0A1S3CZ45|A0A1S3CZ45_DIACI Uncharacterized protein LOC103508016 OS=Diaphorina citri OX=121845 GN=LOC103508016 PE=4 SV=1	1	10	10	10	66.1	12.916	50200000	31185000	40153000	4.05127e+07	39291000	20713000	22387000	2.74637e+07	1.47514	0.181834
A0A1S3CZ55	Prolyl endopeptidase	LOC103508036		tr|A0A1S3CZ55|A0A1S3CZ55_DIACI	tr|A0A1S3CZ55|A0A1S3CZ55_DIACI Prolyl endopeptidase OS=Diaphorina citri OX=121845 GN=LOC103508036 PE=3 SV=1	1	11	11	11	21.1	87.396	603310	355130	525730	494723	364270	464000	278510	368927	1.34098	0.238195
A0A1S3CZ62	Myosin light chain alkali	LOC103508000		tr|A0A1S3CZ62|A0A1S3CZ62_DIACI	tr|A0A1S3CZ62|A0A1S3CZ62_DIACI Myosin light chain alkali OS=Diaphorina citri OX=121845 GN=LOC103508000 PE=4 SV=1	1	8	8	8	73.9	17.928	46040000	27448000	21320000	3.16027e+07	43023000	21420000	27961000	3.08013e+07	1.02602	0.938792
A0A1S3CZ78	Short-chain dehydrogenase/reductase family 16C member 6	LOC103508015		tr|A0A1S3CZ78|A0A1S3CZ78_DIACI	tr|A0A1S3CZ78|A0A1S3CZ78_DIACI Short-chain dehydrogenase/reductase family 16C member 6 OS=Diaphorina citri OX=121845 GN=LOC103508015 PE=4 SV=1	1	4	2	2	27.9	15.378	249700	212090	161830	207873	162130	148020	130140	146763	1.41638	0.0870354
A0A1S3CZ88	Phenoloxidase 1-like	LOC103508125		tr|A0A1S3CZ88|A0A1S3CZ88_DIACI	tr|A0A1S3CZ88|A0A1S3CZ88_DIACI Phenoloxidase 1-like OS=Diaphorina citri OX=121845 GN=LOC103508125 PE=4 SV=1	1	6	6	6	11.9	77.733	3274000	5868700	6335000	5.15923e+06	8756600	6027100	4377700	6.38713e+06	0.807754	0.483767
A0A1S3CZ92	Spectrin beta chain	LOC103507435		tr|A0A1S3CZ92|A0A1S3CZ92_DIACI	tr|A0A1S3CZ92|A0A1S3CZ92_DIACI Spectrin beta chain OS=Diaphorina citri OX=121845 GN=LOC103507435 PE=3 SV=1	1	96	96	96	57.1	266.96	18482000	13369000	14382000	15411000	14195000	13026000	14019000	1.37467e+07	1.12107	0.358294
A0A1S3CZ93	NEDD8-activating enzyme E1 regulatory subunit	LOC103508129		tr|A0A1S3CZ93|A0A1S3CZ93_DIACI	tr|A0A1S3CZ93|A0A1S3CZ93_DIACI NEDD8-activating enzyme E1 regulatory subunit OS=Diaphorina citri OX=121845 GN=LOC103508129 PE=3 SV=1	1	9	9	9	25.4	60.905	411370	308980	324950	348433	200540	247940	279550	242677	1.43579	0.0543127
A0A1S3CZ97	Inositol-1-monophosphatase	LOC103508140		tr|A0A1S3CZ97|A0A1S3CZ97_DIACI;tr|A0A1S3CZR0|A0A1S3CZR0_DIACI	tr|A0A1S3CZ97|A0A1S3CZ97_DIACI Inositol-1-monophosphatase OS=Diaphorina citri OX=121845 GN=LOC103508140 PE=3 SV=1;tr|A0A1S3CZR0|A0A1S3CZR0_DIACI Inositol monophosphatase 1-like OS=Diaphorina citri OX=121845 GN=LOC103508285 PE=3 SV=1	2	6	6	6	45.2	21.247	1217300	938700	1092300	1.08277e+06	532640	766290	951580	750170	1.44336	0.0842955
A0A1S3CZA0	Uncharacterized protein LOC103508051 isoform X1	LOC103508051		tr|A0A1S3CZA0|A0A1S3CZA0_DIACI;tr|A0A3Q0IQK1|A0A3Q0IQK1_DIACI;tr|A0A1S3CZ71|A0A1S3CZ71_DIACI;tr|A0A1S3DP27|A0A1S3DP27_DIACI	tr|A0A1S3CZA0|A0A1S3CZA0_DIACI Uncharacterized protein LOC103508051 isoform X1 OS=Diaphorina citri OX=121845 GN=LOC103508051 PE=3 SV=1;tr|A0A3Q0IQK1|A0A3Q0IQK1_DIACI Protein-L-isoaspartate(D-aspartate) O-methyltransferase-like OS=Diaphorina citri OX=121845	4	8	8	7	23.3	63.219	1727100	1096300	1452100	1.42517e+06	936630	1041200	694020	890617	1.6002	0.063248
A0A1S3CZA5	Heat shock protein 83	LOC103508055		tr|A0A1S3CZA5|A0A1S3CZA5_DIACI	tr|A0A1S3CZA5|A0A1S3CZA5_DIACI Heat shock protein 83 OS=Diaphorina citri OX=121845 GN=LOC103508055 PE=3 SV=1	1	25	25	14	54.9	83.225	10270000	5507100	6242200	7.33977e+06	8353600	6869000	7487600	7.57007e+06	0.969578	0.888485
A0A1S3CZB2	Activating signal cointegrator 1 complex subunit 2 homolog	LOC103508170		tr|A0A1S3CZB2|A0A1S3CZB2_DIACI	tr|A0A1S3CZB2|A0A1S3CZB2_DIACI Activating signal cointegrator 1 complex subunit 2 homolog OS=Diaphorina citri OX=121845 GN=LOC103508170 PE=4 SV=1	1	9	9	9	48.4	39.228	1587700	1178300	959010	1241670	1695900	1327600	1493400	1.50563e+06	0.824683	0.282599
A0A1S3CZB7	Ankyrin-3-like	LOC103508174		tr|A0A1S3CZB7|A0A1S3CZB7_DIACI;tr|A0A3Q0JC46|A0A3Q0JC46_DIACI;tr|A0A1S3DIR6|A0A1S3DIR6_DIACI	tr|A0A1S3CZB7|A0A1S3CZB7_DIACI Ankyrin-3-like OS=Diaphorina citri OX=121845 GN=LOC103508174 PE=4 SV=1	3	10	8	5	26.2	72.858	269270	264660	255350	263093	213360	257330	241330	237340	1.10851	0.128786
A0A1S3CZE0	Uncharacterized protein LOC103508166	LOC103508166		tr|A0A1S3CZE0|A0A1S3CZE0_DIACI	tr|A0A1S3CZE0|A0A1S3CZE0_DIACI Uncharacterized protein LOC103508166 OS=Diaphorina citri OX=121845 GN=LOC103508166 PE=4 SV=1	1	5	1	0	19	44.645	495300	54174	72445	207306	67457	23285		45371	4.56914	0.44967
A0A1S3CZE1	Vigilin-like	LOC103508219		tr|A0A1S3CZE1|A0A1S3CZE1_DIACI	tr|A0A1S3CZE1|A0A1S3CZE1_DIACI Vigilin-like OS=Diaphorina citri OX=121845 GN=LOC103508219 PE=4 SV=1	1	5	5	5	15.8	40.022	823250	367600	525870	572240	517470	330440	139790	329233	1.7381	0.231501
A0A1S3CZE7	Platelet-activating factor acetylhydrolase IB subunit beta isoform X1	LOC103508201		tr|A0A1S3CZE7|A0A1S3CZE7_DIACI	tr|A0A1S3CZE7|A0A1S3CZE7_DIACI Platelet-activating factor acetylhydrolase IB subunit beta isoform X1 OS=Diaphorina citri OX=121845 GN=LOC103508201 PE=4 SV=1	1	8	8	5	50.7	25.09	697360	558470	512040	589290	509600	519200	510490	513097	1.1485	0.243547
A0A1S3CZF5	Phenoloxidase-activating factor 2-like	LOC103508186		tr|A0A1S3CZF5|A0A1S3CZF5_DIACI	tr|A0A1S3CZF5|A0A1S3CZF5_DIACI Phenoloxidase-activating factor 2-like OS=Diaphorina citri OX=121845 GN=LOC103508186 PE=4 SV=1	1	12	12	12	46.7	53.878	673390	1080900	1238600	997630	615490	1392500	1286000	1.098e+06	0.908591	0.751454
A0A1S3CZG3	Proteasome subunit beta	LOC103508142		tr|A0A1S3CZG3|A0A1S3CZG3_DIACI	tr|A0A1S3CZG3|A0A1S3CZG3_DIACI Proteasome subunit beta OS=Diaphorina citri OX=121845 GN=LOC103508142 PE=3 SV=1	1	8	8	8	41.2	25.192	529300	756650	767400	684450	578850	588900	628920	598890	1.14286	0.340409
A0A1S3CZH1	ADP/ATP translocase	LOC103508270		tr|A0A1S3CZH1|A0A1S3CZH1_DIACI	tr|A0A1S3CZH1|A0A1S3CZH1_DIACI ADP/ATP translocase OS=Diaphorina citri OX=121845 GN=LOC103508270 PE=3 SV=1	1	14	11	11	55.4	34.297	422220	693870	581630	565907	648680	602880	963040	738200	0.766603	0.27972
A0A1S3CZH9	Cathepsin B-like cysteine proteinase 4	LOC103508275		tr|A0A1S3CZH9|A0A1S3CZH9_DIACI	tr|A0A1S3CZH9|A0A1S3CZH9_DIACI Cathepsin B-like cysteine proteinase 4 OS=Diaphorina citri OX=121845 GN=LOC103508275 PE=3 SV=1	1	9	9	9	36	38.838	1824700	2144000	1665500	1.87807e+06	1361100	1401000	1802700	1521600	1.23427	0.148033
A0A1S3CZK2	Cell division control protein 42 homolog	LOC103508197		tr|A0A1S3CZK2|A0A1S3CZK2_DIACI	tr|A0A1S3CZK2|A0A1S3CZK2_DIACI Cell division control protein 42 homolog OS=Diaphorina citri OX=121845 GN=LOC103508197 PE=3 SV=1	1	7	7	6	53.4	21.304	556820	968720	1153800	893113	729030	667670	941510	779403	1.14589	0.591037
A0A1S3CZK3	Mitochondrial import inner membrane translocase subunit TIM44	LOC103508306	FUNCTION: Essential component of the PAM complex, a complex required for the translocation of transit peptide-containing proteins from the inner membrane into the mitochondrial matrix in an ATP-dependent manner. {ECO:0000256|PIRNR:PIRNR037871}.	tr|A0A1S3CZK3|A0A1S3CZK3_DIACI	tr|A0A1S3CZK3|A0A1S3CZK3_DIACI Mitochondrial import inner membrane translocase subunit TIM44 OS=Diaphorina citri OX=121845 GN=LOC103508306 PE=3 SV=1	1	8	8	8	26.6	49.488	977660	524380	582240	694760	536910	500560	442880	493450	1.40796	0.237455
A0A1S3CZK8	Protein ABHD11-like	LOC103508289		tr|A0A1S3CZK8|A0A1S3CZK8_DIACI;tr|A0A1S3D0Z3|A0A1S3D0Z3_DIACI;tr|A0A3Q0JL25|A0A3Q0JL25_DIACI	tr|A0A1S3CZK8|A0A1S3CZK8_DIACI Protein ABHD11-like OS=Diaphorina citri OX=121845 GN=LOC103508289 PE=4 SV=1	3	3	3	3	22.7	34.442	97211	100140	79034	92128.3	59468	95207	93772	82815.7	1.11245	0.525841
A0A1S3CZL2	Tubulin beta chain	LOC103508326	FUNCTION: Tubulin is the major constituent of microtubules. It binds two moles of GTP, one at an exchangeable site on the beta chain and one at a non-exchangeable site on the alpha chain. {ECO:0000256|RuleBase:RU000352, ECO:0000256|SAAS:SAAS00031082}.	tr|A0A1S3CZL2|A0A1S3CZL2_DIACI	tr|A0A1S3CZL2|A0A1S3CZL2_DIACI Tubulin beta chain OS=Diaphorina citri OX=121845 GN=LOC103508326 PE=3 SV=1	1	12	9	8	34.9	51.278	364080	369150	456960	396730	530380	763750	1267600	853910	0.464604	0.105819
A0A1S3CZL3	Proteasomal ubiquitin receptor ADRM1	LOC103507607		tr|A0A1S3CZL3|A0A1S3CZL3_DIACI	tr|A0A1S3CZL3|A0A1S3CZL3_DIACI Proteasomal ubiquitin receptor ADRM1 OS=Diaphorina citri OX=121845 GN=LOC103507607 PE=3 SV=1	1	4	4	4	23.2	29.702	151900	154680	138330	148303	201970	159010	158170	173050	0.856997	0.181515
A0A1S3CZL5	IMP dehydrogenase	LOC103508286		tr|A0A1S3CZL5|A0A1S3CZL5_DIACI	tr|A0A1S3CZL5|A0A1S3CZL5_DIACI IMP dehydrogenase OS=Diaphorina citri OX=121845 GN=LOC103508286 PE=4 SV=1	1	11	11	11	30.8	51.106	1260900	646530	959880	955770	806830	790020	471830	689560	1.38606	0.270111
A0A1S3CZL7	Pyridine nucleotide-disulfide oxidoreductase domain-containing protein 2-like	LOC103508352		tr|A0A1S3CZL7|A0A1S3CZL7_DIACI	tr|A0A1S3CZL7|A0A1S3CZL7_DIACI Pyridine nucleotide-disulfide oxidoreductase domain-containing protein 2-like OS=Diaphorina citri OX=121845 GN=LOC103508352 PE=4 SV=1	1	2	2	2	6.5	61.07	66300	29330	40560	45396.7	28511	42949	30119	33859.7	1.34073	0.385687
A0A3Q0JI11	Gamma-aminobutyric acid receptor-associated protein-like	LOC103521693		tr|A0A3Q0JI11|A0A3Q0JI11_DIACI;tr|A0A1S3CZM9|A0A1S3CZM9_DIACI;tr|A0A1S4EAC5|A0A1S4EAC5_DIACI;tr|A0A1S4EAR4|A0A1S4EAR4_DIACI	tr|A0A3Q0JI11|A0A3Q0JI11_DIACI Gamma-aminobutyric acid receptor-associated protein-like OS=Diaphorina citri OX=121845 GN=LOC103521693 PE=3 SV=1;tr|A0A1S3CZM9|A0A1S3CZM9_DIACI Gamma-aminobutyric acid receptor-associated protein isoform X3 OS=Diaphorina citr	4	1	1	1	15.6	12.461	63403	55720	47907	55676.7	95623	3820.8	58546	52663.3	1.05722	0.916623
A0A1S3CZP7	Uncharacterized protein LOC103508338	LOC103508338		tr|A0A1S3CZP7|A0A1S3CZP7_DIACI	tr|A0A1S3CZP7|A0A1S3CZP7_DIACI Uncharacterized protein LOC103508338 OS=Diaphorina citri OX=121845 GN=LOC103508338 PE=4 SV=1	1	1	1	1	4.1	42.183	99073	68988	67726	78595.7	58006	2915.5		30460.8	2.58023	0.143318
A0A1S3CZQ3	UDP-glucose:glycoprotein glucosyltransferase 2-like	LOC103507670		tr|A0A1S3CZQ3|A0A1S3CZQ3_DIACI	tr|A0A1S3CZQ3|A0A1S3CZQ3_DIACI UDP-glucose:glycoprotein glucosyltransferase 2-like OS=Diaphorina citri OX=121845 GN=LOC103507670 PE=4 SV=1	1	3	2	2	19.4	30.285	168870	120320	105040	131410	94008	105810	121730	107183	1.22604	0.309879
A0A1S3CZS7	Uncharacterized protein LOC103508449	LOC103508449		tr|A0A1S3CZS7|A0A1S3CZS7_DIACI	tr|A0A1S3CZS7|A0A1S3CZS7_DIACI Uncharacterized protein LOC103508449 OS=Diaphorina citri OX=121845 GN=LOC103508449 PE=4 SV=1	1	2	2	2	23.1	14.693	622220	2908700	4296700	2.60921e+06	1601200	2098600	887610	1.52914e+06	1.70633	0.392313
A0A1S3CZU1	Trafficking protein particle complex subunit 6B	LOC103508353		tr|A0A1S3CZU1|A0A1S3CZU1_DIACI	tr|A0A1S3CZU1|A0A1S3CZU1_DIACI Trafficking protein particle complex subunit 6B OS=Diaphorina citri OX=121845 GN=LOC103508353 PE=3 SV=1	1	2	2	2	27.3	18.936	4917	45390	35020	28442.3	73266	56593	19298	49719	0.572062	0.348348
A0A1S3CZU9	Proteasome subunit alpha type	LOC103508369	FUNCTION: The proteasome is a multicatalytic proteinase complex which is characterized by its ability to cleave peptides with Arg, Phe, Tyr, Leu, and Glu adjacent to the leaving group at neutral or slightly basic pH. {ECO:0000256|RuleBase:RU000551}.	tr|A0A1S3CZU9|A0A1S3CZU9_DIACI	tr|A0A1S3CZU9|A0A1S3CZU9_DIACI Proteasome subunit alpha type OS=Diaphorina citri OX=121845 GN=LOC103508369 PE=3 SV=2	1	9	9	9	58.1	27.231	1016400	755340	788230	853323	936920	796070	706930	813307	1.0492	0.724792
A0A1S3CZV1	Methylosome subunit pICln	LOC103508485		tr|A0A1S3CZV1|A0A1S3CZV1_DIACI	tr|A0A1S3CZV1|A0A1S3CZV1_DIACI Methylosome subunit pICln OS=Diaphorina citri OX=121845 GN=LOC103508485 PE=3 SV=1	1	2	2	2	17.3	15.417		35435	45255	40345	36741	58626	43022	46129.7	0.8746	0.572614
A0A1S3CZV7	Glyoxylate reductase/hydroxypyruvate reductase-like isoform X3	LOC108251832		tr|A0A1S3CZV7|A0A1S3CZV7_DIACI;tr|A0A3Q0IRF5|A0A3Q0IRF5_DIACI;tr|A0A3Q0IW58|A0A3Q0IW58_DIACI;tr|A0A3Q0IWU8|A0A3Q0IWU8_DIACI	tr|A0A1S3CZV7|A0A1S3CZV7_DIACI Glyoxylate reductase/hydroxypyruvate reductase-like isoform X3 OS=Diaphorina citri OX=121845 GN=LOC108251832 PE=3 SV=1	4	3	3	3	13.2	35.565	21179	5085.6	33166	19810.2	72707	49246	120220	80724.3	0.245406	0.0530597
A0A1S3CZX6	Large ribosomal subunit protein eL14	LOC103508494		tr|A0A1S3CZX6|A0A1S3CZX6_DIACI	tr|A0A1S3CZX6|A0A1S3CZX6_DIACI Large ribosomal subunit protein eL14 OS=Diaphorina citri OX=121845 GN=LOC103508494 PE=3 SV=1	1	3	3	3	17.8	25.796	2472000	1080800	1303400	1.61873e+06	880830	1031800	1151700	1.02144e+06	1.58475	0.244824
A0A1S3CZY1	Chitobiosyldiphosphodolichol beta-mannosyltransferase	LOC103508500		tr|A0A1S3CZY1|A0A1S3CZY1_DIACI	tr|A0A1S3CZY1|A0A1S3CZY1_DIACI Chitobiosyldiphosphodolichol beta-mannosyltransferase OS=Diaphorina citri OX=121845 GN=LOC103508500 PE=4 SV=1	1	2	2	2	8	40.084		30974	27809	29391.5		15522	24873	20197.5	1.4552	0.203554
A0A1S3D007	Actin-related protein 2/3 complex subunit 5	LOC103508511	FUNCTION: Functions as component of the Arp2/3 complex which is involved in regulation of actin polymerization and together with an activating nucleation-promoting factor (NPF) mediates the formation of branched actin networks. Arp2/3 complex plays a critical role in the control of cell morphogenesis via the modulation of cell polarity development. {ECO:0000256|RuleBase:RU004301}.	tr|A0A1S3D007|A0A1S3D007_DIACI	tr|A0A1S3D007|A0A1S3D007_DIACI Actin-related protein 2/3 complex subunit 5 OS=Diaphorina citri OX=121845 GN=LOC103508511 PE=3 SV=1	1	3	3	3	41.4	16.876	231790	203470	144910	193390	140840	183010	177400	167083	1.15745	0.412637
A0A1S3D013	Actin-1	LOC103508596		tr|A0A1S3D013|A0A1S3D013_DIACI	tr|A0A1S3D013|A0A1S3D013_DIACI Actin-1 OS=Diaphorina citri OX=121845 GN=LOC103508596 PE=3 SV=1	1	14	4	4	57.6	27.868	28158000	16783000	18274000	2.10717e+07	16087000	13836000	16743000	1.55553e+07	1.35463	0.20786
A0A1S3D024	Actin-related protein 2/3 complex subunit 4	LOC103508476	FUNCTION: Functions as actin-binding component of the Arp2/3 complex which is involved in regulation of actin polymerization and together with an activating nucleation-promoting factor (NPF) mediates the formation of branched actin networks. Seems to contact the mother actin filament. {ECO:0000256|PIRNR:PIRNR039100}.	tr|A0A1S3D024|A0A1S3D024_DIACI	tr|A0A1S3D024|A0A1S3D024_DIACI Actin-related protein 2/3 complex subunit 4 OS=Diaphorina citri OX=121845 GN=LOC103508476 PE=3 SV=1	1	4	4	4	22.6	19.808	250660	171390	176640	199563	142220	153800	182980	159667	1.24987	0.231694
A0A1S4EB39	Uncharacterized protein LOC103508653 isoform X3	LOC103508653		tr|A0A1S4EB39|A0A1S4EB39_DIACI;tr|A0A1S4EAS0|A0A1S4EAS0_DIACI;tr|A0A1S4EB46|A0A1S4EB46_DIACI;tr|A0A1S4EB47|A0A1S4EB47_DIACI;tr|A0A1S4EB34|A0A1S4EB34_DIACI;tr|A0A1S4EAX2|A0A1S4EAX2_DIACI;tr|A0A1S3D041|A0A1S3D041_DIACI	tr|A0A1S4EB39|A0A1S4EB39_DIACI Uncharacterized protein LOC103508653 isoform X3 OS=Diaphorina citri OX=121845 GN=LOC103508653 PE=4 SV=1;tr|A0A1S4EAS0|A0A1S4EAS0_DIACI Microtubule-associated protein Jupiter-like isoform X2 OS=Diaphorina citri OX=121845 GN=LO	7	2	2	2	39.2	10.422	607590	301250	249160	386000	433600	363750	343870	380407	1.0147	0.963563
A0A1S3D046	folate gamma-glutamyl hydrolase	LOC103508601		tr|A0A1S3D046|A0A1S3D046_DIACI	tr|A0A1S3D046|A0A1S3D046_DIACI folate gamma-glutamyl hydrolase OS=Diaphorina citri OX=121845 GN=LOC103508601 PE=4 SV=1	1	4	4	4	24.8	23.545	156440	321570	351440	276483	229990	264630	336110	276910	0.998459	0.995309
A0A1S3D050	Protein C19orf12 homolog	LOC103507850		tr|A0A1S3D050|A0A1S3D050_DIACI	tr|A0A1S3D050|A0A1S3D050_DIACI Protein C19orf12 homolog OS=Diaphorina citri OX=121845 GN=LOC103507850 PE=3 SV=1	1	5	5	5	58	14.413	501860	234980	246210	327683	186850	142060	163700	164203	1.99559	0.137104
A0A1S3D051	Uncharacterized protein LOC103508667	LOC103508667		tr|A0A1S3D051|A0A1S3D051_DIACI	tr|A0A1S3D051|A0A1S3D051_DIACI Uncharacterized protein LOC103508667 OS=Diaphorina citri OX=121845 GN=LOC103508667 PE=4 SV=1	1	1	1	1	14	15.192	897250	1111700	534610	847853	559310	336300	346990	414200	2.04697	0.0772837
A0A1S3D068	Uncharacterized protein LOC103508636 isoform X1	LOC103508636		tr|A0A1S3D068|A0A1S3D068_DIACI	tr|A0A1S3D068|A0A1S3D068_DIACI Uncharacterized protein LOC103508636 isoform X1 OS=Diaphorina citri OX=121845 GN=LOC103508636 PE=4 SV=1	1	1	1	1	21.5	10.452		127860	597120	362490	666890	15008	32550	238149	1.52211	0.72943
A0A1S3D082	Uncharacterized protein LOC103508678	LOC103508678		tr|A0A1S3D082|A0A1S3D082_DIACI	tr|A0A1S3D082|A0A1S3D082_DIACI Uncharacterized protein LOC103508678 OS=Diaphorina citri OX=121845 GN=LOC103508678 PE=4 SV=1	1	1	1	1	2.8	52.258	2723.3		12907	7815.15	10383	15986	85236	37201.7	0.210075	0.417155
A0A1S3D097	MD-2-related lipid-recognition protein	LOC103507941		tr|A0A1S3D097|A0A1S3D097_DIACI	tr|A0A1S3D097|A0A1S3D097_DIACI MD-2-related lipid-recognition protein OS=Diaphorina citri OX=121845 GN=LOC103507941 PE=4 SV=1	1	2	2	2	35.9	10.479	63384	132080	92727	96063.7	135840	157970	118720	137510	0.698594	0.144773
A0A1S3D0A6	Pyridoxal-dependent decarboxylase domain-containing protein 2	LOC103508731		tr|A0A1S3D0A6|A0A1S3D0A6_DIACI	tr|A0A1S3D0A6|A0A1S3D0A6_DIACI Pyridoxal-dependent decarboxylase domain-containing protein 2 OS=Diaphorina citri OX=121845 GN=LOC103508731 PE=4 SV=1	1	6	6	6	12.2	78.129	187240	119370	189880	165497	143320	99416	141730	128155	1.29138	0.241567
A0A1S3D0B1	Uncharacterized protein LOC103508742	LOC103508742		tr|A0A1S3D0B1|A0A1S3D0B1_DIACI	tr|A0A1S3D0B1|A0A1S3D0B1_DIACI Uncharacterized protein LOC103508742 OS=Diaphorina citri OX=121845 GN=LOC103508742 PE=4 SV=1	1	3	3	3	33	11.958	484350	474220	325820	428130	1006000	725220	612620	781280	0.547985	0.0505629
A0A1S3D0B2	Methionine aminopeptidase	LOC103507971	FUNCTION: Cotranslationally removes the N-terminal methionine from nascent proteins. The N-terminal methionine is often cleaved when the second residue in the primary sequence is small and uncharged (Met-Ala-, Cys, Gly, Pro, Ser, Thr, or Val). {ECO:0000256|RuleBase:RU003653}.	tr|A0A1S3D0B2|A0A1S3D0B2_DIACI;tr|A0A3Q0IQC1|A0A3Q0IQC1_DIACI	tr|A0A1S3D0B2|A0A1S3D0B2_DIACI Methionine aminopeptidase OS=Diaphorina citri OX=121845 GN=LOC103507971 PE=3 SV=1	2	4	4	4	16.5	42.248	204100	94141	132010	143417	102130	98162	80942	93744.7	1.52987	0.205605
A0A1S3D1P6	Retinol dehydrogenase 12 isoform X3	LOC103508728		tr|A0A1S3D1P6|A0A1S3D1P6_DIACI;tr|A0A3Q0IS06|A0A3Q0IS06_DIACI;tr|A0A1S3D0B4|A0A1S3D0B4_DIACI;tr|A0A3Q0JHU1|A0A3Q0JHU1_DIACI	tr|A0A1S3D1P6|A0A1S3D1P6_DIACI Retinol dehydrogenase 12 isoform X3 OS=Diaphorina citri OX=121845 GN=LOC103508728 PE=3 SV=1;tr|A0A3Q0IS06|A0A3Q0IS06_DIACI Retinol dehydrogenase 12 isoform X2 OS=Diaphorina citri OX=121845 GN=LOC103508728 PE=3 SV=1;tr|A0A1S3D	4	3	3	3	16.6	34.606	41404	127750	112920	94024.7	91410	82643	116280	96777.7	0.971553	0.927684
A0A1S3D0C4	Eukaryotic translation initiation factor 4B	LOC103508743		tr|A0A1S3D0C4|A0A1S3D0C4_DIACI	tr|A0A1S3D0C4|A0A1S3D0C4_DIACI Eukaryotic translation initiation factor 4B OS=Diaphorina citri OX=121845 GN=LOC103508743 PE=4 SV=1	1	3	3	3	9.7	33.071	183170	119510	158620	153767	137570	126560	94794	119641	1.28523	0.204591
A0A1S3D0C5	Uncharacterized protein LOC103508661 isoform X2	LOC103508661		tr|A0A1S3D0C5|A0A1S3D0C5_DIACI	tr|A0A1S3D0C5|A0A1S3D0C5_DIACI Uncharacterized protein LOC103508661 isoform X2 OS=Diaphorina citri OX=121845 GN=LOC103508661 PE=4 SV=1	1	4	3	3	43.1	14.726	308630	886680	531460	575590	1837300	745850	869110	1.15075e+06	0.500185	0.208509
A0A1S3D0E1	Small ribosomal subunit protein uS10m	LOC103508828		tr|A0A1S3D0E1|A0A1S3D0E1_DIACI	tr|A0A1S3D0E1|A0A1S3D0E1_DIACI Small ribosomal subunit protein uS10m OS=Diaphorina citri OX=121845 GN=LOC103508828 PE=3 SV=1	1	1	1	1	8.6	19.841	19386	38162	37462	31670	38608	36066	37733	37469	0.845232	0.40191
A0A1S3D0E2	Vesicle-fusing ATPase	LOC103508689	FUNCTION: Required for vesicle-mediated transport. Catalyzes the fusion of transport vesicles within the Golgi cisternae. Is also required for transport from the endoplasmic reticulum to the Golgi stack. Seems to function as a fusion protein required for the delivery of cargo proteins to all compartments of the Golgi stack independent of vesicle origin. {ECO:0000256|RuleBase:RU367045}.	tr|A0A1S3D0E2|A0A1S3D0E2_DIACI	tr|A0A1S3D0E2|A0A1S3D0E2_DIACI Vesicle-fusing ATPase OS=Diaphorina citri OX=121845 GN=LOC103508689 PE=3 SV=1	1	3	3	3	40.3	14.952	56236	65375	51962	57857.7	90430	51405	51475	64436.7	0.8979	0.653515
A0A1S3D0E5	Mitochondrial import inner membrane translocase subunit	LOC103508799	FUNCTION: Mitochondrial intermembrane chaperone that participates in the import and insertion of some multi-pass transmembrane proteins into the mitochondrial inner membrane. Also required for the transfer of beta-barrel precursors from the TOM complex to the sorting and assembly machinery (SAM complex) of the outer membrane. Acts as a chaperone-like protein that protects the hydrophobic precurso…	tr|A0A1S3D0E5|A0A1S3D0E5_DIACI	tr|A0A1S3D0E5|A0A1S3D0E5_DIACI Mitochondrial import inner membrane translocase subunit OS=Diaphorina citri OX=121845 GN=LOC103508799 PE=3 SV=1	1	2	2	2	28.9	10.096	767600	520660	536190	608150	725170	426650	500070	550630	1.10446	0.657179
A0A1S3D0E9	Mitochondrial import inner membrane translocase subunit TIM14-like isoform X1	LOC103508783		tr|A0A1S3D0E9|A0A1S3D0E9_DIACI;tr|A0A3Q0IS60|A0A3Q0IS60_DIACI	tr|A0A1S3D0E9|A0A1S3D0E9_DIACI Mitochondrial import inner membrane translocase subunit TIM14-like isoform X1 OS=Diaphorina citri OX=121845 GN=LOC103508783 PE=4 SV=1;tr|A0A3Q0IS60|A0A3Q0IS60_DIACI Mitochondrial import inner membrane translocase subunit TIM1	2	3	3	3	36.2	12.49	55382	131090	75099	87190.3	102790	107070	109690	106517	0.81856	0.443726
A0A1S3D0G2	Mitochondrial import inner membrane translocase subunit	LOC103508727		tr|A0A1S3D0G2|A0A1S3D0G2_DIACI	tr|A0A1S3D0G2|A0A1S3D0G2_DIACI Mitochondrial import inner membrane translocase subunit OS=Diaphorina citri OX=121845 GN=LOC103508727 PE=3 SV=1	1	3	3	3	34	11.07	182050	159340	170080	170490	120090	157570	115680	131113	1.30033	0.0565665
A0A1S4EBH5	Eukaryotic translation initiation factor 4H-like isoform X6	LOC103508862		tr|A0A1S4EBH5|A0A1S4EBH5_DIACI;tr|A0A1S3D1X7|A0A1S3D1X7_DIACI;tr|A0A1S4EBE1|A0A1S4EBE1_DIACI;tr|A0A1S3D0J2|A0A1S3D0J2_DIACI;tr|A0A1S3D0H9|A0A1S3D0H9_DIACI;tr|A0A1S4EB57|A0A1S4EB57_DIACI	tr|A0A1S4EBH5|A0A1S4EBH5_DIACI Eukaryotic translation initiation factor 4H-like isoform X6 OS=Diaphorina citri OX=121845 GN=LOC103508862 PE=4 SV=1;tr|A0A1S3D1X7|A0A1S3D1X7_DIACI Eukaryotic translation initiation factor 4H-like isoform X5 OS=Diaphorina citr	6	3	3	3	16	33.447	412590	382250	508250	434363	389500	469350	257120	371990	1.16767	0.438739
A0A1S3D0K9	Uncharacterized protein LOC103508946 isoform X1	LOC103508946		tr|A0A1S3D0K9|A0A1S3D0K9_DIACI	tr|A0A1S3D0K9|A0A1S3D0K9_DIACI Uncharacterized protein LOC103508946 isoform X1 OS=Diaphorina citri OX=121845 GN=LOC103508946 PE=4 SV=1	1	2	1	1	34.3	15.673	522950	275730	295510	364730	291080	101680	216660	203140	1.79546	0.169589
A0A1S3D0L5	Uncharacterized protein LOC103508106	LOC103508106		tr|A0A1S3D0L5|A0A1S3D0L5_DIACI	tr|A0A1S3D0L5|A0A1S3D0L5_DIACI Uncharacterized protein LOC103508106 OS=Diaphorina citri OX=121845 GN=LOC103508106 PE=4 SV=1	1	1	1	1	8.8	19.043	86260	38409	69771	64813.3	55699	45284	38370	46451	1.39531	0.285583
A0A1S3D0N6	2-oxoglutarate dehydrogenase, mitochondrial-like	LOC103508861		tr|A0A1S3D0N6|A0A1S3D0N6_DIACI	tr|A0A1S3D0N6|A0A1S3D0N6_DIACI 2-oxoglutarate dehydrogenase, mitochondrial-like OS=Diaphorina citri OX=121845 GN=LOC103508861 PE=3 SV=1	1	2	2	2	7.7	46.023		8881.9	15249	12065.5	9009	10141	37454	18868	0.639466	0.617045
A0A1S3D0P0	Lysosomal alpha-glucosidase-like	LOC103508865		tr|A0A1S3D0P0|A0A1S3D0P0_DIACI	tr|A0A1S3D0P0|A0A1S3D0P0_DIACI Lysosomal alpha-glucosidase-like OS=Diaphorina citri OX=121845 GN=LOC103508865 PE=4 SV=1	1	3	3	3	37.8	12.614	499930	137670	177890	271830	279430	138260	85536	167742	1.62052	0.463113
A0A1S3D0P3	Endocuticle structural glycoprotein SgAbd-2-like	LOC103508942		tr|A0A1S3D0P3|A0A1S3D0P3_DIACI	tr|A0A1S3D0P3|A0A1S3D0P3_DIACI Endocuticle structural glycoprotein SgAbd-2-like OS=Diaphorina citri OX=121845 GN=LOC103508942 PE=4 SV=1	1	3	3	3	42.9	15.115	9264600	6407400	6421400	7.36447e+06	8454800	6234300	5671800	6.78697e+06	1.08509	0.673962
A0A1S3D0Q7	Elongin-B	LOC103509001		tr|A0A1S3D0Q7|A0A1S3D0Q7_DIACI	tr|A0A1S3D0Q7|A0A1S3D0Q7_DIACI Elongin-B OS=Diaphorina citri OX=121845 GN=LOC103509001 PE=4 SV=1	1	3	3	3	29.5	14.562	352420	345130	317810	338453	563950	381330	350430	431903	0.783632	0.238161
A0A1S3D0S6	Elongator complex protein 3	LOC103509039	FUNCTION: Catalytic tRNA acetyltransferase subunit of the RNA polymerase II elongator complex, which is a component of the RNA polymerase II (Pol II) holoenzyme and is involved in transcriptional elongation. {ECO:0000256|PIRNR:PIRNR005669}.	tr|A0A1S3D0S6|A0A1S3D0S6_DIACI	tr|A0A1S3D0S6|A0A1S3D0S6_DIACI Elongator complex protein 3 OS=Diaphorina citri OX=121845 GN=LOC103509039 PE=3 SV=1	1	3	3	3	8.8	63.337	1797300	1900600	1943400	1.88043e+06	1845300	1434600	1202400	1494100	1.25857	0.115745
A0A1S3D0T3	Alpha-tocopherol transfer protein-like	LOC103508939		tr|A0A1S3D0T3|A0A1S3D0T3_DIACI	tr|A0A1S3D0T3|A0A1S3D0T3_DIACI Alpha-tocopherol transfer protein-like OS=Diaphorina citri OX=121845 GN=LOC103508939 PE=4 SV=1	1	1	1	1	5.2	32.747	26578	12366		19472	4201.4		42552	23376.7	0.832966	0.866197
A0A1S3D0V5	U2 small nuclear ribonucleoprotein A	LOC103509096		tr|A0A1S3D0V5|A0A1S3D0V5_DIACI	tr|A0A1S3D0V5|A0A1S3D0V5_DIACI U2 small nuclear ribonucleoprotein A OS=Diaphorina citri OX=121845 GN=LOC103509096 PE=3 SV=1	1	1	1	1	6.2	31.104	24344	3066.4	11447	12952.5	4932.7	15965	10410	10435.9	1.24115	0.735949
A0A1S3D0W6	Ras-related protein Rab-39B-like	LOC103509152		tr|A0A1S3D0W6|A0A1S3D0W6_DIACI	tr|A0A1S3D0W6|A0A1S3D0W6_DIACI Ras-related protein Rab-39B-like OS=Diaphorina citri OX=121845 GN=LOC103509152 PE=4 SV=1	1	5	5	4	36.5	21.56	702460	1129400	1009800	947220	626200	837000	1316800	926667	1.02218	0.936047
A0A1S3D0X5	LOW QUALITY PROTEIN: clavesin-1-like	LOC103509126		tr|A0A1S3D0X5|A0A1S3D0X5_DIACI	tr|A0A1S3D0X5|A0A1S3D0X5_DIACI LOW QUALITY PROTEIN: clavesin-1-like OS=Diaphorina citri OX=121845 GN=LOC103509126 PE=4 SV=1	1	2	2	2	7.6	33.793	104690	2103.9	11031	39275	1732.2	4085.4	1692.4	2503.33	15.6891	0.325245
A0A1S3D0X6	Uncharacterized protein LOC103509172	LOC103509172		tr|A0A1S3D0X6|A0A1S3D0X6_DIACI	tr|A0A1S3D0X6|A0A1S3D0X6_DIACI Uncharacterized protein LOC103509172 OS=Diaphorina citri OX=121845 GN=LOC103509172 PE=4 SV=1	1	4	4	4	27.6	17.553	712030	465600	394900	524177	421090	192480	437840	350470	1.49564	0.23545
A0A1S3D0X8	Uncharacterized protein LOC103509106	LOC103509106		tr|A0A1S3D0X8|A0A1S3D0X8_DIACI	tr|A0A1S3D0X8|A0A1S3D0X8_DIACI Uncharacterized protein LOC103509106 OS=Diaphorina citri OX=121845 GN=LOC103509106 PE=4 SV=1	1	5	5	5	28.5	29.472	479520	642200	697410	606377	554410	624230	632990	603877	1.00414	0.973209
A0A1S3D0Y6	Lipid storage droplets surface-binding protein 2	LOC103509186		tr|A0A1S3D0Y6|A0A1S3D0Y6_DIACI	tr|A0A1S3D0Y6|A0A1S3D0Y6_DIACI Lipid storage droplets surface-binding protein 2 OS=Diaphorina citri OX=121845 GN=LOC103509186 PE=3 SV=1	1	3	3	3	43.8	15.873		39594	46996	43295	46983	229400	232170	169518	0.255401	0.209039
A0A1S3D0Z6	Vacuolar protein sorting-associated protein VTA1 homolog isoform X1	LOC103509201		tr|A0A1S3D0Z6|A0A1S3D0Z6_DIACI;tr|A0A1S3DP90|A0A1S3DP90_DIACI;tr|A0A1S3D173|A0A1S3D173_DIACI	tr|A0A1S3D0Z6|A0A1S3D0Z6_DIACI Vacuolar protein sorting-associated protein VTA1 homolog isoform X1 OS=Diaphorina citri OX=121845 GN=LOC103509201 PE=3 SV=1;tr|A0A1S3DP90|A0A1S3DP90_DIACI Vacuolar protein sorting-associated protein VTA1 homolog OS=Diaphorina	3	4	4	4	23.1	34.635	117700	56386	163250	112445	124900	143550	245040	171163	0.656948	0.292636
A0A1S4EAH3	15-hydroxyprostaglandin dehydrogenase [NAD(+)] isoform X6	LOC103508305		tr|A0A1S4EAH3|A0A1S4EAH3_DIACI;tr|A0A1S3D104|A0A1S3D104_DIACI;tr|A0A1S4EAP3|A0A1S4EAP3_DIACI;tr|A0A3Q0IR48|A0A3Q0IR48_DIACI	tr|A0A1S4EAH3|A0A1S4EAH3_DIACI 15-hydroxyprostaglandin dehydrogenase [NAD(+)] isoform X6 OS=Diaphorina citri OX=121845 GN=LOC103508305 PE=3 SV=1;tr|A0A1S3D104|A0A1S3D104_DIACI 15-hydroxyprostaglandin dehydrogenase [NAD(+)] isoform X4 OS=Diaphorina citri OX	4	10	10	10	49.8	31.456	1026300	881280	1082900	996827	1357700	1053100	843280	1.08469e+06	0.918994	0.614148
A0A1S3D116	Flightin	LOC103508322		tr|A0A1S3D116|A0A1S3D116_DIACI	tr|A0A1S3D116|A0A1S3D116_DIACI Flightin OS=Diaphorina citri OX=121845 GN=LOC103508322 PE=4 SV=1	1	4	3	3	42.3	15.772	12435000	8670300	8153600	9.75297e+06	6308400	7881600	3595400	5.92847e+06	1.64511	0.106274
A0A1S3D144	Uncharacterized protein LOC103509279	LOC103509279		tr|A0A1S3D144|A0A1S3D144_DIACI	tr|A0A1S3D144|A0A1S3D144_DIACI Uncharacterized protein LOC103509279 OS=Diaphorina citri OX=121845 GN=LOC103509279 PE=3 SV=1	1	2	2	2	19.6	16.795	159800	34265	104410	99491.7	5197.5	16042	15856	12365.2	8.04612	0.0754034
A0A1S3D166	Sodium/potassium-transporting ATPase subunit alpha	LOC103508421		tr|A0A1S3D166|A0A1S3D166_DIACI;tr|A0A3Q0JFJ8|A0A3Q0JFJ8_DIACI	tr|A0A1S3D166|A0A1S3D166_DIACI Sodium/potassium-transporting ATPase subunit alpha OS=Diaphorina citri OX=121845 GN=LOC103508421 PE=3 SV=1	2	22	22	21	31.4	111.89	2125600	1473800	1656800	1.75207e+06	1228900	1213700	1552300	1.33163e+06	1.31573	0.132855
A0A1S3D172	Transmembrane emp24 domain-containing protein eca	LOC103509321		tr|A0A1S3D172|A0A1S3D172_DIACI	tr|A0A1S3D172|A0A1S3D172_DIACI Transmembrane emp24 domain-containing protein eca OS=Diaphorina citri OX=121845 GN=LOC103509321 PE=3 SV=1	1	4	4	1	20.1	24.99	164540	178640	158960	167380	75819	277940	411730	255163	0.655973	0.420201
A0A1S3D184	Mitochondrial intermembrane space import and assembly protein 40-B-like	LOC103509337		tr|A0A1S3D184|A0A1S3D184_DIACI;tr|A0A1S3DL69|A0A1S3DL69_DIACI;tr|A0A3Q0ITC5|A0A3Q0ITC5_DIACI	tr|A0A1S3D184|A0A1S3D184_DIACI Mitochondrial intermembrane space import and assembly protein 40-B-like OS=Diaphorina citri OX=121845 GN=LOC103509337 PE=4 SV=1;tr|A0A1S3DL69|A0A1S3DL69_DIACI Mitochondrial intermembrane space import and assembly protein 40 O	3	2	2	2	16	16.026		118950	117040	117995	86270	116310	99661	100747	1.1712	0.222451
A0A1S3D192	Ras-related protein Rab-21	LOC103509259		tr|A0A1S3D192|A0A1S3D192_DIACI	tr|A0A1S3D192|A0A1S3D192_DIACI Ras-related protein Rab-21 OS=Diaphorina citri OX=121845 GN=LOC103509259 PE=3 SV=1	1	2	2	2	13.5	25.089	146820	46870	15429	69706.3	48968		37586	43277	1.6107	0.642057
A0A1S3D197	Histone-lysine N-methyltransferase NSD3	LOC103509368		tr|A0A1S3D197|A0A1S3D197_DIACI	tr|A0A1S3D197|A0A1S3D197_DIACI Histone-lysine N-methyltransferase NSD3 OS=Diaphorina citri OX=121845 GN=LOC103509368 PE=4 SV=1	1	5	5	5	25.1	31.103	266070	180140	152270	199493	272620	191240	245420	236427	0.843785	0.426557
A0A1S3D1A8	Cofilin/actin-depolymerizing factor homolog isoform X1	LOC103509384		tr|A0A1S3D1A8|A0A1S3D1A8_DIACI	tr|A0A1S3D1A8|A0A1S3D1A8_DIACI Cofilin/actin-depolymerizing factor homolog isoform X1 OS=Diaphorina citri OX=121845 GN=LOC103509384 PE=3 SV=2	1	6	6	6	48.4	14.97	3979300	7751600	7368600	6366500	8851100	8848100	8086800	8.59533e+06	0.740693	0.143061
A0A1S3D1A9	U6 snRNA-associated Sm-like protein LSm1	LOC103509335	FUNCTION: Probably involved with other LSm subunits in the general process of degradation of mRNAs. {ECO:0000256|RuleBase:RU365047}.	tr|A0A1S3D1A9|A0A1S3D1A9_DIACI	tr|A0A1S3D1A9|A0A1S3D1A9_DIACI U6 snRNA-associated Sm-like protein LSm1 OS=Diaphorina citri OX=121845 GN=LOC103509335 PE=3 SV=1	1	2	2	2	22.8	15.865	51887	40203	77120	56403.3	19621	45740	23024	29461.7	1.91447	0.119335
A0A1S3D1B0	Craniofacial development protein 2-like	LOC103508479		tr|A0A1S3D1B0|A0A1S3D1B0_DIACI	tr|A0A1S3D1B0|A0A1S3D1B0_DIACI Craniofacial development protein 2-like OS=Diaphorina citri OX=121845 GN=LOC103508479 PE=4 SV=1	1	1	1	1	11.6	22.699		91061	71880	81470.5	103650	168520	138660	136943	0.594921	0.115357
A0A1S3D1B5	Trifunctional enzyme subunit alpha, mitochondrial	LOC103508490		tr|A0A1S3D1B5|A0A1S3D1B5_DIACI;tr|A0A3Q0IRI8|A0A3Q0IRI8_DIACI	tr|A0A1S3D1B5|A0A1S3D1B5_DIACI Trifunctional enzyme subunit alpha, mitochondrial OS=Diaphorina citri OX=121845 GN=LOC103508490 PE=4 SV=1	2	14	14	8	36.3	64.092	6177400	7512100	6418400	6.70263e+06	4439200	5336000	5842200	5205800	1.28753	0.0614084
A0A1S3D1C2	Probable protein disulfide-isomerase ER-60	LOC103509302		tr|A0A1S3D1C2|A0A1S3D1C2_DIACI	tr|A0A1S3D1C2|A0A1S3D1C2_DIACI Probable protein disulfide-isomerase ER-60 OS=Diaphorina citri OX=121845 GN=LOC103509302 PE=4 SV=1	1	3	3	3	36.2	7.7627	1228700	846930	896600	990743	985400	835990	746730	856040	1.15736	0.386129
A0A1S3D1D3	GPI mannosyltransferase 1	LOC103509385	FUNCTION: Mannosyltransferase involved in glycosylphosphatidylinositol-anchor biosynthesis. Transfers the first alpha-1,4-mannose to GlcN-acyl-PI during GPI precursor assembly. {ECO:0000256|RuleBase:RU365064}.	tr|A0A1S3D1D3|A0A1S3D1D3_DIACI	tr|A0A1S3D1D3|A0A1S3D1D3_DIACI GPI mannosyltransferase 1 OS=Diaphorina citri OX=121845 GN=LOC103509385 PE=3 SV=2	1	5	5	5	17.6	47.728	117470	103550	123630	114883	134630	23913	81588	80043.7	1.43526	0.344326
A0A1S3D1D4	28S ribosomal protein S34, mitochondrial	LOC103509417		tr|A0A1S3D1D4|A0A1S3D1D4_DIACI	tr|A0A1S3D1D4|A0A1S3D1D4_DIACI 28S ribosomal protein S34, mitochondrial OS=Diaphorina citri OX=121845 GN=LOC103509417 PE=4 SV=1	1	2	2	2	21.4	24.858	38905	47181	55440	47175.3		40514	37594	39054	1.20795	0.285118
A0A1S3D1F5	Programmed cell death protein 6 isoform X2	LOC103509446		tr|A0A1S3D1F5|A0A1S3D1F5_DIACI;tr|A0A3Q0IY30|A0A3Q0IY30_DIACI	tr|A0A1S3D1F5|A0A1S3D1F5_DIACI Programmed cell death protein 6 isoform X2 OS=Diaphorina citri OX=121845 GN=LOC103509446 PE=4 SV=1;tr|A0A3Q0IY30|A0A3Q0IY30_DIACI Programmed cell death protein 6 isoform X1 OS=Diaphorina citri OX=121845 GN=LOC103509446 PE=4 S	2	6	6	5	45.8	20.58	270230	235380	185520	230377	207900	253920	305570	255797	0.900624	0.534189
A0A1S3D1G9	Protein canopy homolog 3	LOC103509466		tr|A0A1S3D1G9|A0A1S3D1G9_DIACI	tr|A0A1S3D1G9|A0A1S3D1G9_DIACI Protein canopy homolog 3 OS=Diaphorina citri OX=121845 GN=LOC103509466 PE=4 SV=1	1	3	3	3	23.9	24.073	22795	46742	58965	42834	60561	130670	65839	85690	0.499872	0.160587
A0A1S3D1I0	26S proteasome regulatory subunit 8	LOC103508602		tr|A0A1S3D1I0|A0A1S3D1I0_DIACI;tr|A0A1S3DSR8|A0A1S3DSR8_DIACI;tr|A0A3Q0IRQ7|A0A3Q0IRQ7_DIACI	tr|A0A1S3D1I0|A0A1S3D1I0_DIACI 26S proteasome regulatory subunit 8 OS=Diaphorina citri OX=121845 GN=LOC103508602 PE=3 SV=1;tr|A0A1S3DSR8|A0A1S3DSR8_DIACI 26S proteasome regulatory subunit 8-like OS=Diaphorina citri OX=121845 GN=LOC103524060 PE=3 SV=2	3	13	13	12	45.2	45.531	1559400	945090	1107000	1203830	1350300	1024400	877300	1084000	1.11054	0.631202
A0A1S3D1J0	Mitochondrial proton/calcium exchanger protein-like	LOC103508619		tr|A0A1S3D1J0|A0A1S3D1J0_DIACI	tr|A0A1S3D1J0|A0A1S3D1J0_DIACI Mitochondrial proton/calcium exchanger protein-like OS=Diaphorina citri OX=121845 GN=LOC103508619 PE=4 SV=2	1	1	1	1	17.3	12.632	163250	58418	68226	96631.3	67231	38854		53042.5	1.82177	0.398943
A0A1S3D1J4	Protein enhancer of sevenless 2B	LOC103509503		tr|A0A1S3D1J4|A0A1S3D1J4_DIACI;tr|A0A1S3D1F1|A0A1S3D1F1_DIACI	tr|A0A1S3D1J4|A0A1S3D1J4_DIACI Protein enhancer of sevenless 2B OS=Diaphorina citri OX=121845 GN=LOC103509503 PE=4 SV=1;tr|A0A1S3D1F1|A0A1S3D1F1_DIACI Protein enhancer of sevenless 2B-like OS=Diaphorina citri OX=121845 GN=LOC103509346 PE=4 SV=1	2	6	6	6	29.8	28.088	957080	619150	604460	726897	797100	624320	604330	675250	1.07649	0.712317
A0A1S3D1K0	Uncharacterized protein LOC103508637	LOC103508637		tr|A0A1S3D1K0|A0A1S3D1K0_DIACI	tr|A0A1S3D1K0|A0A1S3D1K0_DIACI Uncharacterized protein LOC103508637 OS=Diaphorina citri OX=121845 GN=LOC103508637 PE=4 SV=1	1	13	13	13	38.1	71.517	1405800	1765700	1444200	1.53857e+06	1500400	1569200	1649300	1.57297e+06	0.97813	0.791871
A0A1S3D1L9	Inositol-3-phosphate synthase-like	LOC103509558		tr|A0A1S3D1L9|A0A1S3D1L9_DIACI	tr|A0A1S3D1L9|A0A1S3D1L9_DIACI Inositol-3-phosphate synthase-like OS=Diaphorina citri OX=121845 GN=LOC103509558 PE=4 SV=1	1	4	3	3	62	11.252	181180	106760	127910	138617	111570	57232	183480	117427	1.18045	0.646081
A0A1S3D1M8	Uncharacterized protein LOC103509599 isoform X1	LOC103509599		tr|A0A1S3D1M8|A0A1S3D1M8_DIACI	tr|A0A1S3D1M8|A0A1S3D1M8_DIACI Uncharacterized protein LOC103509599 isoform X1 OS=Diaphorina citri OX=121845 GN=LOC103509599 PE=4 SV=1	1	2	2	2	18	18.074		19763	26052	22907.5	88714	49741	93282	77245.7	0.296554	0.0567303
A0A1S3D1N2	Proliferation-associated protein 2G4	LOC103509465		tr|A0A1S3D1N2|A0A1S3D1N2_DIACI	tr|A0A1S3D1N2|A0A1S3D1N2_DIACI Proliferation-associated protein 2G4 OS=Diaphorina citri OX=121845 GN=LOC103509465 PE=3 SV=1	1	17	17	17	60	44.96	1844400	1938900	2495800	2.09303e+06	1628500	1888900	1592800	1703400	1.22874	0.156408
A0A1S3D1P7	ADP-ribosylation factor-like protein 8	LOC103509482		tr|A0A1S3D1P7|A0A1S3D1P7_DIACI;tr|A0A3Q0IYU0|A0A3Q0IYU0_DIACI	tr|A0A1S3D1P7|A0A1S3D1P7_DIACI ADP-ribosylation factor-like protein 8 OS=Diaphorina citri OX=121845 GN=LOC103509482 PE=4 SV=1;tr|A0A3Q0IYU0|A0A3Q0IYU0_DIACI ADP-ribosylation factor-like protein 8B-A OS=Diaphorina citri OX=121845 GN=LOC108252427 PE=3 SV=1	2	4	4	4	54.3	10.497	122890	110090	57991	96990.3	35338	84828	113580	77915.3	1.24482	0.562737
A0A1S3D1Q6	phosphoenolpyruvate carboxykinase (GTP)	LOC103509504		tr|A0A1S3D1Q6|A0A1S3D1Q6_DIACI	tr|A0A1S3D1Q6|A0A1S3D1Q6_DIACI phosphoenolpyruvate carboxykinase (GTP) OS=Diaphorina citri OX=121845 GN=LOC103509504 PE=3 SV=1	1	16	15	15	36.2	73.932	1647700	1133700	1430500	1.40397e+06	1036700	1008700	950660	998687	1.40581	0.0551131
A0A1S3D1R4	SRSF protein kinase 1-like	LOC103509632		tr|A0A1S3D1R4|A0A1S3D1R4_DIACI	tr|A0A1S3D1R4|A0A1S3D1R4_DIACI SRSF protein kinase 1-like OS=Diaphorina citri OX=121845 GN=LOC103509632 PE=4 SV=1	1	1	1	1	2.4	83.45		284560	155810	220185	217690	226440	309310	251147	0.876719	0.646783
A0A1S3D1S6	Dihydropyrimidinase-like	LOC103509550		tr|A0A1S3D1S6|A0A1S3D1S6_DIACI	tr|A0A1S3D1S6|A0A1S3D1S6_DIACI Dihydropyrimidinase-like OS=Diaphorina citri OX=121845 GN=LOC103509550 PE=3 SV=2	1	17	17	17	49.4	65.267	1936500	2054500	1611100	1.86737e+06	2518200	2158600	2180600	2285800	0.816942	0.0766615
Q0PWT8	Cytochrome c oxidase subunit 4 (Fragment)			tr|Q0PWT8|Q0PWT8_DIACI;tr|A0A1S3D1T5|A0A1S3D1T5_DIACI	tr|Q0PWT8|Q0PWT8_DIACI Cytochrome c oxidase subunit 4 (Fragment) OS=Diaphorina citri OX=121845 PE=2 SV=1;tr|A0A1S3D1T5|A0A1S3D1T5_DIACI Cytochrome c oxidase subunit 4 OS=Diaphorina citri OX=121845 GN=LOC103509664 PE=3 SV=1	2	6	6	6	54.8	18.16	9028700	7703700	7351500	8.02797e+06	7305200	5196200	7827900	6.77643e+06	1.18469	0.259263
A0A1S3D1V1	Defense protein Hdd11	LOC103508820		tr|A0A1S3D1V1|A0A1S3D1V1_DIACI	tr|A0A1S3D1V1|A0A1S3D1V1_DIACI Defense protein Hdd11 OS=Diaphorina citri OX=121845 GN=LOC103508820 PE=4 SV=1	1	4	4	4	48.2	17.27	175690	60909	41906	92835	97367	150060	127090	124839	0.743638	0.511671
A0A1S3DRC5	Mitochondrial-processing peptidase subunit alpha-like	LOC103523330		tr|A0A1S3DRC5|A0A1S3DRC5_DIACI;tr|A0A1S3D1W3|A0A1S3D1W3_DIACI	tr|A0A1S3DRC5|A0A1S3DRC5_DIACI Mitochondrial-processing peptidase subunit alpha-like OS=Diaphorina citri OX=121845 GN=LOC103523330 PE=3 SV=1;tr|A0A1S3D1W3|A0A1S3D1W3_DIACI Mitochondrial-processing peptidase subunit alpha-like isoform X1 OS=Diaphorina citri	2	9	9	9	28.5	57.874	620580	1176000	1142500	979693	898310	862840	918890	893347	1.09666	0.65746
A0A1S3D1W5	Superoxide dismutase [Cu-Zn]	LOC103509717	FUNCTION: Destroys radicals which are normally produced within the cells and which are toxic to biological systems. {ECO:0000256|RuleBase:RU000393}.	tr|A0A1S3D1W5|A0A1S3D1W5_DIACI;tr|C5NS97|C5NS97_DIACI	tr|A0A1S3D1W5|A0A1S3D1W5_DIACI Superoxide dismutase [Cu-Zn] OS=Diaphorina citri OX=121845 GN=LOC103509717 PE=3 SV=1;tr|C5NS97|C5NS97_DIACI Copper zinc superoxide dismutase (Fragment) OS=Diaphorina citri OX=121845 GN=CuZN SOD PE=2 SV=1	2	7	7	7	78.1	15.976	13839000	15030000	15442000	1.47703e+07	17367000	15109000	12019000	1.48317e+07	0.995865	0.971663
A0A1S3D1W7	Eukaryotic translation initiation factor 5A	LOC103508849		tr|A0A1S3D1W7|A0A1S3D1W7_DIACI	tr|A0A1S3D1W7|A0A1S3D1W7_DIACI Eukaryotic translation initiation factor 5A OS=Diaphorina citri OX=121845 GN=LOC103508849 PE=3 SV=1	1	10	10	10	67.5	17.498	2448700	4535600	5661600	4215300	5312200	5064200	3931600	4.76933e+06	0.883834	0.620064
A0A1S3D1X5	26S proteasome regulatory subunit 7	LOC103509734		tr|A0A1S3D1X5|A0A1S3D1X5_DIACI	tr|A0A1S3D1X5|A0A1S3D1X5_DIACI 26S proteasome regulatory subunit 7 OS=Diaphorina citri OX=121845 GN=LOC103509734 PE=3 SV=1	1	3	3	3	15.9	38.074	642180	165260	440030	415823	195450	189230	19971	134884	3.08283	0.133762
A0A1S3D225	T-complex protein 1 subunit delta	LOC103509713		tr|A0A1S3D225|A0A1S3D225_DIACI	tr|A0A1S3D225|A0A1S3D225_DIACI T-complex protein 1 subunit delta OS=Diaphorina citri OX=121845 GN=LOC103509713 PE=3 SV=1	1	18	18	18	55.7	57.279	1503900	1365900	1646200	1.50533e+06	917220	1268800	1300500	1.16217e+06	1.29527	0.0799736
A0A1S3D228	mannose-6-phosphate isomerase	LOC103509837		tr|A0A1S3D228|A0A1S3D228_DIACI	tr|A0A1S3D228|A0A1S3D228_DIACI mannose-6-phosphate isomerase OS=Diaphorina citri OX=121845 GN=LOC103509837 PE=3 SV=1	1	3	3	3	21.2	26.405	96415	72511	74496	81140.7	77289	74747	81605	77880.3	1.04186	0.701548
A0A1S3D229	Uncharacterized protein LOC103509726	LOC103509726		tr|A0A1S3D229|A0A1S3D229_DIACI	tr|A0A1S3D229|A0A1S3D229_DIACI Uncharacterized protein LOC103509726 OS=Diaphorina citri OX=121845 GN=LOC103509726 PE=4 SV=2	1	2	2	2	18.9	19.735	235670	159480	150020	181723	132930	89265	100470	107555	1.68959	0.0694327
A0A1S3D242	ER membrane protein complex subunit 2	LOC103509838		tr|A0A1S3D242|A0A1S3D242_DIACI	tr|A0A1S3D242|A0A1S3D242_DIACI ER membrane protein complex subunit 2 OS=Diaphorina citri OX=121845 GN=LOC103509838 PE=3 SV=1	1	2	2	2	11.2	33.059		66563	78831	72697	28512	50221	50134	42955.7	1.69237	0.0643589
A0A1S3D255	Sm protein F	LOC103509919	FUNCTION: Associated with the spliceosome snRNP U1, U2, U4/U6 and U5. {ECO:0000256|PIRNR:PIRNR006609}.	tr|A0A1S3D255|A0A1S3D255_DIACI	tr|A0A1S3D255|A0A1S3D255_DIACI Sm protein F OS=Diaphorina citri OX=121845 GN=LOC103509919 PE=3 SV=1	1	4	4	4	61.4	9.7732	83416	316990	381860	260755	177740	254610	216760	216370	1.20514	0.659095
A0A1S3D262	Endophilin-B2 isoform X1	LOC103509012		tr|A0A1S3D262|A0A1S3D262_DIACI;tr|A0A1S3D0P9|A0A1S3D0P9_DIACI	tr|A0A1S3D262|A0A1S3D262_DIACI Endophilin-B2 isoform X1 OS=Diaphorina citri OX=121845 GN=LOC103509012 PE=4 SV=1;tr|A0A1S3D0P9|A0A1S3D0P9_DIACI Endophilin-B1 isoform X2 OS=Diaphorina citri OX=121845 GN=LOC103509012 PE=4 SV=1	2	4	4	4	19.4	33.5	517580	321300	123710	320863	436470	369890	278290	361550	0.887466	0.756648
A0A1S3D277	Translation initiation factor eIF-2B subunit gamma	LOC103509044		tr|A0A1S3D277|A0A1S3D277_DIACI	tr|A0A1S3D277|A0A1S3D277_DIACI Translation initiation factor eIF-2B subunit gamma OS=Diaphorina citri OX=121845 GN=LOC103509044 PE=4 SV=2	1	2	2	2	9.4	35.776		25464	37291	31377.5	12438	31759	38746	27647.7	1.13491	0.758412
A0A1S3D2C9	Acidic leucine-rich nuclear phosphoprotein 32 family member A-like	LOC103509130		tr|A0A1S3D2C9|A0A1S3D2C9_DIACI	tr|A0A1S3D2C9|A0A1S3D2C9_DIACI Acidic leucine-rich nuclear phosphoprotein 32 family member A-like OS=Diaphorina citri OX=121845 GN=LOC103509130 PE=3 SV=1	1	6	6	6	52.4	13.746	545420	523700	514240	527787	799290	655260	582640	679063	0.777227	0.0783788
A0A1S3D2D9	Copper transport protein	LOC103509151		tr|A0A1S3D2D9|A0A1S3D2D9_DIACI;tr|A0A3Q0JPM0|A0A3Q0JPM0_DIACI	tr|A0A1S3D2D9|A0A1S3D2D9_DIACI Copper transport protein OS=Diaphorina citri OX=121845 GN=LOC103509151 PE=3 SV=1;tr|A0A3Q0JPM0|A0A3Q0JPM0_DIACI Copper transport protein OS=Diaphorina citri OX=121845 GN=LOC103523459 PE=3 SV=1	2	2	2	2	16	15.076		112650	112150	112400	117600	152710	178140	149483	0.751923	0.200233
A0A1S3D2F1	Regucalcin-like	LOC103509948		tr|A0A1S3D2F1|A0A1S3D2F1_DIACI	tr|A0A1S3D2F1|A0A1S3D2F1_DIACI Regucalcin-like OS=Diaphorina citri OX=121845 GN=LOC103509948 PE=3 SV=2	1	8	4	4	47.1	17.12	1431700	1108500	896040	1.14541e+06	2025000	1751600	1366600	1714400	0.668113	0.0821196
A0A1S3D2G7	Glyceraldehyde-3-phosphate dehydrogenase	LOC103509971		tr|A0A1S3D2G7|A0A1S3D2G7_DIACI	tr|A0A1S3D2G7|A0A1S3D2G7_DIACI Glyceraldehyde-3-phosphate dehydrogenase OS=Diaphorina citri OX=121845 GN=LOC103509971 PE=3 SV=1	1	10	8	8	45.6	39.302	153350	354800	403440	303863	392230	460760	537920	463637	0.655391	0.141403
A0A1S3D2J2	COP9 signalosome complex subunit 3	LOC103510012		tr|A0A1S3D2J2|A0A1S3D2J2_DIACI	tr|A0A1S3D2J2|A0A1S3D2J2_DIACI COP9 signalosome complex subunit 3 OS=Diaphorina citri OX=121845 GN=LOC103510012 PE=4 SV=1	1	5	5	5	19.5	49.541	328920	229260	210390	256190	162350	154870	223210	180143	1.42215	0.149275
A0A1S3D2L2	Glutathione hydrolase 1 proenzyme	LOC103510162		tr|A0A1S3D2L2|A0A1S3D2L2_DIACI;tr|A0A3Q0IZF9|A0A3Q0IZF9_DIACI	tr|A0A1S3D2L2|A0A1S3D2L2_DIACI Glutathione hydrolase 1 proenzyme OS=Diaphorina citri OX=121845 GN=LOC103510162 PE=4 SV=2;tr|A0A3Q0IZF9|A0A3Q0IZF9_DIACI Glutathione hydrolase 1 proenzyme-like OS=Diaphorina citri OX=121845 GN=LOC113465335 PE=4 SV=1	2	3	3	3	9.7	55.977	22094	39298	38837	33409.7	25015	42807	61763	43195	0.773461	0.461455
A0A1S3D2Q2	Uncharacterized protein LOC103510254 isoform X1	LOC103510254		tr|A0A1S3D2Q2|A0A1S3D2Q2_DIACI;tr|A0A1S3D2W9|A0A1S3D2W9_DIACI	tr|A0A1S3D2Q2|A0A1S3D2Q2_DIACI Uncharacterized protein LOC103510254 isoform X1 OS=Diaphorina citri OX=121845 GN=LOC103510254 PE=4 SV=1;tr|A0A1S3D2W9|A0A1S3D2W9_DIACI Uncharacterized protein LOC103510254 isoform X6 OS=Diaphorina citri OX=121845 GN=LOC103510	2	6	1	1	31.7	32.515	64000	45536	106090	71875.3	51959	62227	33385	49190.3	1.46117	0.315947
A0A1S3D2Q5	CCHC-type zinc finger protein CG3800-like	LOC103510257		tr|A0A1S3D2Q5|A0A1S3D2Q5_DIACI	tr|A0A1S3D2Q5|A0A1S3D2Q5_DIACI CCHC-type zinc finger protein CG3800-like OS=Diaphorina citri OX=121845 GN=LOC103510257 PE=4 SV=1	1	3	3	3	29.1	16.837	288450	302430	384800	325227	366390	49101	118960	178150	1.82557	0.218455
A0A1S3D2R5	Reactive oxygen species modulator 1	LOC103509371		tr|A0A1S3D2R5|A0A1S3D2R5_DIACI	tr|A0A1S3D2R5|A0A1S3D2R5_DIACI Reactive oxygen species modulator 1 OS=Diaphorina citri OX=121845 GN=LOC103509371 PE=3 SV=1	1	1	1	1	20.5	7.9844	266550	81349	90234	146044		51159	62430	56794.5	2.57145	0.335393
A0A1S3D2S5	Uncharacterized protein LOC103510161	LOC103510161		tr|A0A1S3D2S5|A0A1S3D2S5_DIACI	tr|A0A1S3D2S5|A0A1S3D2S5_DIACI Uncharacterized protein LOC103510161 OS=Diaphorina citri OX=121845 GN=LOC103510161 PE=4 SV=1	1	1	1	1	21.2	9.6863	193020	123250	144100	153457	132210	182460	79302	131324	1.16853	0.574548
A0A1S3D2U1	Fructose-bisphosphate aldolase	LOC103510324		tr|A0A1S3D2U1|A0A1S3D2U1_DIACI	tr|A0A1S3D2U1|A0A1S3D2U1_DIACI Fructose-bisphosphate aldolase OS=Diaphorina citri OX=121845 GN=LOC103510324 PE=3 SV=1	1	7	6	6	26.9	39.167	455270	610670	600830	555590	561580	422070	634410	539353	1.0301	0.849131
A0A1S3D2U7	Transmembrane protein 177	LOC103510337		tr|A0A1S3D2U7|A0A1S3D2U7_DIACI	tr|A0A1S3D2U7|A0A1S3D2U7_DIACI Transmembrane protein 177 OS=Diaphorina citri OX=121845 GN=LOC103510337 PE=4 SV=2	1	4	4	4	17.8	26.3	219530	347460	63522	210171	140400	149540	165930	151957	1.3831	0.519052
A0A1S3D2W5	Uncharacterized protein LOC103510362	LOC103510362		tr|A0A1S3D2W5|A0A1S3D2W5_DIACI	tr|A0A1S3D2W5|A0A1S3D2W5_DIACI Uncharacterized protein LOC103510362 OS=Diaphorina citri OX=121845 GN=LOC103510362 PE=4 SV=2	1	2	2	2	3.5	56.139	49240	40992	30385	40205.7	37010	71959	32918	47295.7	0.850092	0.628127
A0A1S3D2Z2	Large ribosomal subunit protein mL46	LOC103510439		tr|A0A1S3D2Z2|A0A1S3D2Z2_DIACI;tr|A0A1S3DQT7|A0A1S3DQT7_DIACI	tr|A0A1S3D2Z2|A0A1S3D2Z2_DIACI Large ribosomal subunit protein mL46 OS=Diaphorina citri OX=121845 GN=LOC103510439 PE=3 SV=1;tr|A0A1S3DQT7|A0A1S3DQT7_DIACI 39S ribosomal protein L46, mitochondrial-like OS=Diaphorina citri OX=121845 GN=LOC103523104 PE=4 SV=1	2	2	2	2	5.4	32.517	23298	14385	28180	21954.3	50799	23394	19096	31096.3	0.70601	0.441788
A0A1S3D331	Uncharacterized protein LOC103509555	LOC103509555		tr|A0A1S3D331|A0A1S3D331_DIACI	tr|A0A1S3D331|A0A1S3D331_DIACI Uncharacterized protein LOC103509555 OS=Diaphorina citri OX=121845 GN=LOC103509555 PE=4 SV=1	1	7	7	7	20.2	54.506	147720	201830	100090	149880	316560	221660	686820	408347	0.367041	0.149068
A0A1S3D354	V-type proton ATPase subunit F	LOC103510477	FUNCTION: Subunit of the peripheral V1 complex of vacuolar ATPase essential for assembly or catalytic function. V-ATPase is responsible for acidifying a variety of intracellular compartments in eukaryotic cells. {ECO:0000256|PIRNR:PIRNR015945}.	tr|A0A1S3D354|A0A1S3D354_DIACI	tr|A0A1S3D354|A0A1S3D354_DIACI V-type proton ATPase subunit F OS=Diaphorina citri OX=121845 GN=LOC103510477 PE=3 SV=1	1	8	8	8	81.5	13.758	1001600	1281500	1609200	1.29743e+06	1522000	1576600	1247100	1.44857e+06	0.895667	0.498008
A0A1S3D365	Protein ABHD16A	LOC103509612		tr|A0A1S3D365|A0A1S3D365_DIACI	tr|A0A1S3D365|A0A1S3D365_DIACI Protein ABHD16A OS=Diaphorina citri OX=121845 GN=LOC103509612 PE=4 SV=1	1	4	4	4	10.8	56.843	66159	67931	94979	76356.3	71251	24640	60920	52270.3	1.4608	0.227967
A0A1S3D367	Cytoplasmic phosphatidylinositol transfer protein 1	LOC103510487		tr|A0A1S3D367|A0A1S3D367_DIACI	tr|A0A1S3D367|A0A1S3D367_DIACI Cytoplasmic phosphatidylinositol transfer protein 1 OS=Diaphorina citri OX=121845 GN=LOC103510487 PE=4 SV=1	1	6	6	6	34.1	32.372	46082	165030	218770	143294	125040	146840	166180	146020	0.981331	0.960995
A0A1S3D369	Eukaryotic translation initiation factor 3 subunit A	LOC103510513		tr|A0A1S3D369|A0A1S3D369_DIACI	tr|A0A1S3D369|A0A1S3D369_DIACI Eukaryotic translation initiation factor 3 subunit A OS=Diaphorina citri OX=121845 GN=LOC103510513 PE=4 SV=1	1	14	14	14	22.3	106.42	919410	562560	684430	722133	375680	460910	471370	435987	1.65632	0.0585105
A0A1S3D383	phenylalanine--tRNA ligase	LOC103510531		tr|A0A1S3D383|A0A1S3D383_DIACI;tr|A0A1S3D397|A0A1S3D397_DIACI	tr|A0A1S3D383|A0A1S3D383_DIACI phenylalanine--tRNA ligase OS=Diaphorina citri OX=121845 GN=LOC103510531 PE=3 SV=1;tr|A0A1S3D397|A0A1S3D397_DIACI Phenylalanine--tRNA ligase alpha subunit-like OS=Diaphorina citri OX=121845 GN=LOC103510535 PE=4 SV=1	2	7	7	7	27.2	55.728	467550	266080	334940	356190	332280	304180	305730	314063	1.13413	0.520138
A0A1S3D3A2	NEDD8-activating enzyme E1 catalytic subunit	LOC103510542		tr|A0A1S3D3A2|A0A1S3D3A2_DIACI;tr|A0A1S3DNP3|A0A1S3DNP3_DIACI	tr|A0A1S3D3A2|A0A1S3D3A2_DIACI NEDD8-activating enzyme E1 catalytic subunit OS=Diaphorina citri OX=121845 GN=LOC103510542 PE=3 SV=1;tr|A0A1S3DNP3|A0A1S3DNP3_DIACI Nedd8-activating enzyme E1 catalytic subunit-like OS=Diaphorina citri OX=121845 GN=LOC1035221	2	2	2	2	12.1	49.405	13019	18649	19781	17149.7	12800	31304	33038	25714	0.666939	0.27668
A0A1S3DJJ7	Pro-resilin-like	LOC103519740		tr|A0A1S3DJJ7|A0A1S3DJJ7_DIACI;tr|A0A1S3D4U2|A0A1S3D4U2_DIACI;tr|A0A1S3D3B7|A0A1S3D3B7_DIACI	tr|A0A1S3DJJ7|A0A1S3DJJ7_DIACI Pro-resilin-like OS=Diaphorina citri OX=121845 GN=LOC103519740 PE=4 SV=1;tr|A0A1S3D4U2|A0A1S3D4U2_DIACI Pro-resilin-like isoform X3 OS=Diaphorina citri OX=121845 GN=LOC103510569 PE=4 SV=1;tr|A0A1S3D3B7|A0A1S3D3B7_DIACI Pro-re	3	6	6	6	46.3	14.407	2656800	2478900	2027200	2.38763e+06	3032500	2913700	2225100	2.72377e+06	0.876592	0.344396
A0A1S3D3C2	Bifunctional coenzyme A synthase-like	LOC103509691		tr|A0A1S3D3C2|A0A1S3D3C2_DIACI	tr|A0A1S3D3C2|A0A1S3D3C2_DIACI Bifunctional coenzyme A synthase-like OS=Diaphorina citri OX=121845 GN=LOC103509691 PE=4 SV=1	1	4	4	4	27.2	25.91	60027	48132	44086	50748.3	64524	99232	147450	103735	0.48921	0.0967423
A0A1S3D3C5	NADH dehydrogenase [ubiquinone] 1 alpha subcomplex subunit 7	LOC103510596		tr|A0A1S3D3C5|A0A1S3D3C5_DIACI	tr|A0A1S3D3C5|A0A1S3D3C5_DIACI NADH dehydrogenase [ubiquinone] 1 alpha subcomplex subunit 7 OS=Diaphorina citri OX=121845 GN=LOC103510596 PE=3 SV=1	1	5	5	5	76.1	10.416	1862400	4465600	3214700	3180900	4577400	3629800	3865000	4.02407e+06	0.790469	0.353408
A0A1S3D3E8	dolichyl-phosphate beta-glucosyltransferase	LOC103510627		tr|A0A1S3D3E8|A0A1S3D3E8_DIACI	tr|A0A1S3D3E8|A0A1S3D3E8_DIACI dolichyl-phosphate beta-glucosyltransferase OS=Diaphorina citri OX=121845 GN=LOC103510627 PE=3 SV=1	1	2	2	2	7.1	38.678	27745	4014.5	60481	30746.8	12341	16870	18761	15990.7	1.9228	0.421183
A0A1S3D3G1	ATP synthase subunit s, mitochondrial-like	LOC103510654		tr|A0A1S3D3G1|A0A1S3D3G1_DIACI	tr|A0A1S3D3G1|A0A1S3D3G1_DIACI ATP synthase subunit s, mitochondrial-like OS=Diaphorina citri OX=121845 GN=LOC103510654 PE=4 SV=1	1	4	4	4	28.9	22.328	348160	192590	212960	251237	180640	158280	207680	182200	1.37891	0.246219
A0A3Q0IW35	KH domain-containing, RNA-binding, signal transduction-associated protein 2-like isoform X3	LOC103510682		tr|A0A3Q0IW35|A0A3Q0IW35_DIACI;tr|A0A1S3D3H1|A0A1S3D3H1_DIACI	tr|A0A3Q0IW35|A0A3Q0IW35_DIACI KH domain-containing, RNA-binding, signal transduction-associated protein 2-like isoform X3 OS=Diaphorina citri OX=121845 GN=LOC103510682 PE=4 SV=1;tr|A0A1S3D3H1|A0A1S3D3H1_DIACI KH domain-containing, RNA-binding, signal tran	2	5	5	5	17.3	42.491	157150	342630	163290	221023	127750	494930	204410	275697	0.80169	0.689698
A0A1S3D3H5	Protein-L-isoaspartate(D-aspartate) O-methyltransferase-like	LOC103510692		tr|A0A1S3D3H5|A0A1S3D3H5_DIACI	tr|A0A1S3D3H5|A0A1S3D3H5_DIACI Protein-L-isoaspartate(D-aspartate) O-methyltransferase-like OS=Diaphorina citri OX=121845 GN=LOC103510692 PE=3 SV=1	1	9	9	9	46	38.747	799910	1044400	1402500	1082270	879050	1010800	699110	862987	1.2541	0.327872
A0A1S3D3I4	NADH dehydrogenase [ubiquinone] 1 alpha subcomplex assembly factor 2	LOC103510714		tr|A0A1S3D3I4|A0A1S3D3I4_DIACI	tr|A0A1S3D3I4|A0A1S3D3I4_DIACI NADH dehydrogenase [ubiquinone] 1 alpha subcomplex assembly factor 2 OS=Diaphorina citri OX=121845 GN=LOC103510714 PE=3 SV=1	1	3	3	3	30.2	17.209	115710	60187	31465	69120.7	5846.1	120050	141590	89162	0.775225	0.702585
A0A1S3D3J2	Metastasis-associated protein MTA1	LOC103521734		tr|A0A1S3D3J2|A0A1S3D3J2_DIACI	tr|A0A1S3D3J2|A0A1S3D3J2_DIACI Metastasis-associated protein MTA1 OS=Diaphorina citri OX=121845 GN=LOC103521734 PE=4 SV=1	1	1	1	1	6.4	36.905	5450800	3887100	3378300	4.23873e+06	4409600	3373800	2669400	3.48427e+06	1.21654	0.400457
A0A1S3D3J3	E3 ubiquitin-protein ligase RNF181	LOC103509834		tr|A0A1S3D3J3|A0A1S3D3J3_DIACI	tr|A0A1S3D3J3|A0A1S3D3J3_DIACI E3 ubiquitin-protein ligase RNF181 OS=Diaphorina citri OX=121845 GN=LOC103509834 PE=4 SV=1	1	3	3	3	44.4	16.579	62211	57527	61810	60516	70743	65299	57710	64584	0.937012	0.373655
A0A1S3D3L3	Ras-like GTP-binding protein Rho1	LOC103510737		tr|A0A1S3D3L3|A0A1S3D3L3_DIACI	tr|A0A1S3D3L3|A0A1S3D3L3_DIACI Ras-like GTP-binding protein Rho1 OS=Diaphorina citri OX=121845 GN=LOC103510737 PE=4 SV=1	1	9	9	9	65.6	21.721	712280	1687100	1734100	1.37783e+06	823260	1727400	1212400	1.25435e+06	1.09844	0.785199
A0A1S3D3N4	28S ribosomal protein S35, mitochondrial	LOC103510776		tr|A0A1S3D3N4|A0A1S3D3N4_DIACI;tr|A0A1S3D560|A0A1S3D560_DIACI	tr|A0A1S3D3N4|A0A1S3D3N4_DIACI 28S ribosomal protein S35, mitochondrial OS=Diaphorina citri OX=121845 GN=LOC103510776 PE=4 SV=1	2	5	5	5	23.3	40.2	170720	70197	91729	110882	126360	77543	55469	86457.3	1.28251	0.545728
A0A1S3D3N5	Uncharacterized protein LOC103510798	LOC103510798		tr|A0A1S3D3N5|A0A1S3D3N5_DIACI;tr|A0A1S3D3N8|A0A1S3D3N8_DIACI	tr|A0A1S3D3N5|A0A1S3D3N5_DIACI Uncharacterized protein LOC103510798 OS=Diaphorina citri OX=121845 GN=LOC103510798 PE=4 SV=1	2	11	11	11	52.9	26.884	1145800	839230	748710	911247	554970	932840	875980	787930	1.15651	0.50399
A0A3Q0IQ85	E3 ubiquitin-protein ligase KCMF1-like	LOC103505806		tr|A0A3Q0IQ85|A0A3Q0IQ85_DIACI;tr|A0A1S3D3T4|A0A1S3D3T4_DIACI	tr|A0A3Q0IQ85|A0A3Q0IQ85_DIACI E3 ubiquitin-protein ligase KCMF1-like OS=Diaphorina citri OX=121845 GN=LOC103505806 PE=4 SV=1;tr|A0A1S3D3T4|A0A1S3D3T4_DIACI E3 ubiquitin-protein ligase KCMF1 isoform X1 OS=Diaphorina citri OX=121845 GN=LOC103510853 PE=4 SV=	2	1	1	1	6	31.569	10614	2625.5	3296.6	5512.03	23557	8984.4	13710	15417.1	0.357526	0.118503
A0A1S3D3U1	Peroxidase-like	LOC103510881		tr|A0A1S3D3U1|A0A1S3D3U1_DIACI;tr|A0A3Q0IWL8|A0A3Q0IWL8_DIACI	tr|A0A1S3D3U1|A0A1S3D3U1_DIACI Peroxidase-like OS=Diaphorina citri OX=121845 GN=LOC103510881 PE=4 SV=1	2	5	5	5	13	74.018	481180	205370	232170	306240	164860	97557	27274	96563.7	3.17138	0.0952142
A0A1S3D3W6	Protein scabrous-like	LOC103510814		tr|A0A1S3D3W6|A0A1S3D3W6_DIACI;tr|A0A3Q0ILC5|A0A3Q0ILC5_DIACI	tr|A0A1S3D3W6|A0A1S3D3W6_DIACI Protein scabrous-like OS=Diaphorina citri OX=121845 GN=LOC103510814 PE=4 SV=2;tr|A0A3Q0ILC5|A0A3Q0ILC5_DIACI Protein scabrous OS=Diaphorina citri OX=121845 GN=LOC103506106 PE=4 SV=1	2	1	1	1	14.7	19.1		736850	562300	649575	1114300	908130		1011215	0.642371	0.115767
A0A1S3D3X3	Obg-like ATPase 1	LOC103510054	FUNCTION: Hydrolyzes ATP, and can also hydrolyze GTP with lower efficiency. Has lower affinity for GTP. {ECO:0000256|HAMAP-Rule:MF_03167}.	tr|A0A1S3D3X3|A0A1S3D3X3_DIACI;tr|A0A1S3D2E0|A0A1S3D2E0_DIACI;tr|A0A1S3D2G1|A0A1S3D2G1_DIACI;tr|A0A1S4ECU8|A0A1S4ECU8_DIACI;tr|A0A1S3D2L6|A0A1S3D2L6_DIACI	tr|A0A1S3D3X3|A0A1S3D3X3_DIACI Obg-like ATPase 1 OS=Diaphorina citri OX=121845 GN=LOC103510054 PE=3 SV=1;tr|A0A1S3D2E0|A0A1S3D2E0_DIACI Obg-like ATPase 1 OS=Diaphorina citri OX=121845 GN=LOC103510054 PE=3 SV=1;tr|A0A1S3D2G1|A0A1S3D2G1_DIACI Obg-like ATPase	5	14	14	14	46.3	48.501	2174700	1352200	1574500	1.70047e+06	1373300	1397700	1126300	1299100	1.30896	0.198217
A0A3Q0IUB4	Uncharacterized protein LOC113466771	LOC113466771		tr|A0A3Q0IUB4|A0A3Q0IUB4_DIACI;tr|A0A1S3D3X8|A0A1S3D3X8_DIACI	tr|A0A3Q0IUB4|A0A3Q0IUB4_DIACI Uncharacterized protein LOC113466771 OS=Diaphorina citri OX=121845 GN=LOC113466771 PE=4 SV=1;tr|A0A1S3D3X8|A0A1S3D3X8_DIACI CKLF-like MARVEL transmembrane domain-containing protein 8 OS=Diaphorina citri OX=121845 GN=LOC103510	2	1	1	1	16.2	12.113	655180	469810	412060	512350	450350	489280	493020	477550	1.07287	0.665111
A0A1S3D3Y4	LOW QUALITY PROTEIN: complement component 1 Q subcomponent-binding protein, mitochondrial	LOC103510846		tr|A0A1S3D3Y4|A0A1S3D3Y4_DIACI	tr|A0A1S3D3Y4|A0A1S3D3Y4_DIACI LOW QUALITY PROTEIN: complement component 1 Q subcomponent-binding protein, mitochondrial OS=Diaphorina citri OX=121845 GN=LOC103510846 PE=3 SV=1	1	8	8	8	42.8	28.858	5232300	2862600	2962700	3.68587e+06	3587700	2600900	1961000	2.71653e+06	1.35683	0.345375
A0A1S3D419	Nucleoporin Nup43-like	LOC103510990		tr|A0A1S3D419|A0A1S3D419_DIACI	tr|A0A1S3D419|A0A1S3D419_DIACI Nucleoporin Nup43-like OS=Diaphorina citri OX=121845 GN=LOC103510990 PE=4 SV=1	1	1	1	1	4.4	30.234	26940	159180	137700	107940	178950	146180	122440	149190	0.723507	0.4028
A0A1S3D420	Lamin Dm0	LOC103510146		tr|A0A1S3D420|A0A1S3D420_DIACI;tr|A0A1S3DSJ0|A0A1S3DSJ0_DIACI;tr|A0A1S3DT80|A0A1S3DT80_DIACI	tr|A0A1S3D420|A0A1S3D420_DIACI Lamin Dm0 OS=Diaphorina citri OX=121845 GN=LOC103510146 PE=4 SV=1	3	17	17	17	41.4	48.429	3928600	2502700	2528200	2986500	3643500	2954000	2603900	3.06713e+06	0.973711	0.892745
A0A1S3D421	Bis(5-nucleosyl)-tetraphosphatase [asymmetrical]	LOC103511012		tr|A0A1S3D421|A0A1S3D421_DIACI;tr|A0A1S4EDN0|A0A1S4EDN0_DIACI	tr|A0A1S3D421|A0A1S3D421_DIACI Bis(5-nucleosyl)-tetraphosphatase [asymmetrical] OS=Diaphorina citri OX=121845 GN=LOC103511012 PE=3 SV=1;tr|A0A1S4EDN0|A0A1S4EDN0_DIACI Bis(5-nucleosyl)-tetraphosphatase [asymmetrical] OS=Diaphorina citri OX=121845 GN=LOC10	2	2	2	2	15.1	19.249	148410	97183	97581	114391	100510	82365	54780	79218.3	1.444	0.178598
A0A1S3D442	Mitochondrial import inner membrane translocase subunit	LOC103511040	FUNCTION: Mitochondrial intermembrane chaperone that participates in the import and insertion of some multi-pass transmembrane proteins into the mitochondrial inner membrane. Also required for the transfer of beta-barrel precursors from the TOM complex to the sorting and assembly machinery (SAM complex) of the outer membrane. Acts as a chaperone-like protein that protects the hydrophobic precurso…	tr|A0A1S3D442|A0A1S3D442_DIACI	tr|A0A1S3D442|A0A1S3D442_DIACI Mitochondrial import inner membrane translocase subunit OS=Diaphorina citri OX=121845 GN=LOC103511040 PE=3 SV=1	1	3	3	3	37.9	11.444	277120	295720	282350	285063	289610	548830	409530	415990	0.685265	0.156242
A0A1S3D462	Large ribosomal subunit protein uL29	LOC103510951		tr|A0A1S3D462|A0A1S3D462_DIACI	tr|A0A1S3D462|A0A1S3D462_DIACI Large ribosomal subunit protein uL29 OS=Diaphorina citri OX=121845 GN=LOC103510951 PE=3 SV=1	1	3	3	3	16.8	14.932	225410	168810	245430	213217	111010	189200	116890	139033	1.53357	0.094791
A0A1S3D469	F-actin-capping protein subunit alpha	LOC103511100	FUNCTION: F-actin-capping proteins bind in a Ca(2+)-independent manner to the fast growing ends of actin filaments (barbed end) thereby blocking the exchange of subunits at these ends. Unlike other capping proteins (such as gelsolin and severin), these proteins do not sever actin filaments. {ECO:0000256|RuleBase:RU365077, ECO:0000256|SAAS:SAAS01187389}.	tr|A0A1S3D469|A0A1S3D469_DIACI	tr|A0A1S3D469|A0A1S3D469_DIACI F-actin-capping protein subunit alpha OS=Diaphorina citri OX=121845 GN=LOC103511100 PE=3 SV=1	1	9	9	9	57.5	32.438	1520000	1003600	1001000	1.17487e+06	1054100	982240	858230	964857	1.21766	0.312336
A0A1S3D4B4	RNA-binding protein 33 isoform X2	LOC103511154		tr|A0A1S3D4B4|A0A1S3D4B4_DIACI;tr|A0A1S3D497|A0A1S3D497_DIACI	tr|A0A1S3D4B4|A0A1S3D4B4_DIACI RNA-binding protein 33 isoform X2 OS=Diaphorina citri OX=121845 GN=LOC103511154 PE=4 SV=1;tr|A0A1S3D497|A0A1S3D497_DIACI Splicing factor 3B subunit 2 isoform X1 OS=Diaphorina citri OX=121845 GN=LOC103511154 PE=4 SV=1	2	2	2	2	6.1	58.089	212030	142030	170980	175013	232660	129820	108750	157077	1.11419	0.700149
A0A1S3D4D5	Uncharacterized protein LOC103511229	LOC103511229		tr|A0A1S3D4D5|A0A1S3D4D5_DIACI	tr|A0A1S3D4D5|A0A1S3D4D5_DIACI Uncharacterized protein LOC103511229 OS=Diaphorina citri OX=121845 GN=LOC103511229 PE=4 SV=1	1	1	1	1	9.2	14.447	241700	150990		196345	131560	132730	176070	146787	1.33762	0.290716
A0A1S3D4D9	Plexin A3-like isoform X1	LOC103511236		tr|A0A1S3D4D9|A0A1S3D4D9_DIACI	tr|A0A1S3D4D9|A0A1S3D4D9_DIACI Plexin A3-like isoform X1 OS=Diaphorina citri OX=121845 GN=LOC103511236 PE=4 SV=1	1	4	3	3	15.2	36.183	10100	41111	110860	54023.7	20868	101110	6114	42697.3	1.26527	0.80047
A0A1S3D4F7	Cathepsin F-like	LOC103511254		tr|A0A1S3D4F7|A0A1S3D4F7_DIACI	tr|A0A1S3D4F7|A0A1S3D4F7_DIACI Cathepsin F-like OS=Diaphorina citri OX=121845 GN=LOC103511254 PE=3 SV=1	1	8	3	3	49.1	24.475	242150	1050100	1159000	817083	58438	533270	113120	234943	3.4778	0.148471
A0A1S3D4I7	Calcium uniporter protein	LOC103511309	FUNCTION: Mitochondrial inner membrane calcium uniporter that mediates calcium uptake into mitochondria. Constitutes a pore-forming and calcium-conducting subunit. Mitochondrial calcium homeostasis plays key roles in cellular physiology and regulates cell bioenergetics, cytoplasmic calcium signals and activation of cell death pathways. {ECO:0000256|RuleBase:RU367035}.	tr|A0A1S3D4I7|A0A1S3D4I7_DIACI	tr|A0A1S3D4I7|A0A1S3D4I7_DIACI Calcium uniporter protein OS=Diaphorina citri OX=121845 GN=LOC103511309 PE=3 SV=1	1	4	4	4	19.1	44.494	161340	184940	124700	156993	109230	165590	134380	136400	1.15098	0.438079
A0A1S3D4J6	Extracellular serine/threonine protein CG31145	LOC103511332		tr|A0A1S3D4J6|A0A1S3D4J6_DIACI	tr|A0A1S3D4J6|A0A1S3D4J6_DIACI Extracellular serine/threonine protein CG31145 OS=Diaphorina citri OX=121845 GN=LOC103511332 PE=3 SV=1	1	3	3	3	7.2	67.107	129580	12557	122930	88355.7	44210	47538	25901	39216.3	2.25303	0.27132
A0A1S3D4K4	Acyl-coenzyme A thioesterase 9, mitochondrial-like	LOC103510447		tr|A0A1S3D4K4|A0A1S3D4K4_DIACI;tr|A0A3Q0IVJ9|A0A3Q0IVJ9_DIACI	tr|A0A1S3D4K4|A0A1S3D4K4_DIACI Acyl-coenzyme A thioesterase 9, mitochondrial-like OS=Diaphorina citri OX=121845 GN=LOC103510447 PE=4 SV=1	2	6	6	6	23.2	51.053	80940	207290	61378	116536	35930	140170	101930	92676.7	1.25745	0.686459
A0A1S3D4L1	Multiple coagulation factor deficiency protein 2 homolog	LOC103511356		tr|A0A1S3D4L1|A0A1S3D4L1_DIACI	tr|A0A1S3D4L1|A0A1S3D4L1_DIACI Multiple coagulation factor deficiency protein 2 homolog OS=Diaphorina citri OX=121845 GN=LOC103511356 PE=4 SV=1	1	5	5	5	41	22.313	293010	296780	356910	315567	431200	391490	300940	374543	0.842537	0.248949
A0A1S3D4N2	Signal peptidase complex subunit 2	LOC103511381		tr|A0A1S3D4N2|A0A1S3D4N2_DIACI	tr|A0A1S3D4N2|A0A1S3D4N2_DIACI Signal peptidase complex subunit 2 OS=Diaphorina citri OX=121845 GN=LOC103511381 PE=3 SV=1	1	3	3	3	23.4	21.603	35562	142770	104770	94367.3	52150	67884	182580	100871	0.935522	0.905987
A0A1S3D4Q3	Tetratricopeptide repeat protein 19 homolog, mitochondrial	LOC103511402		tr|A0A1S3D4Q3|A0A1S3D4Q3_DIACI	tr|A0A1S3D4Q3|A0A1S3D4Q3_DIACI Tetratricopeptide repeat protein 19 homolog, mitochondrial OS=Diaphorina citri OX=121845 GN=LOC103511402 PE=3 SV=1	1	2	2	2	12.6	32.295	8991.9	32174	50770	30645.3	16374	48497	60655	41842	0.732405	0.565607
A0A1S3D4R1	ATP synthase subunit delta, mitochondrial isoform X1	LOC103511460		tr|A0A1S3D4R1|A0A1S3D4R1_DIACI	tr|A0A1S3D4R1|A0A1S3D4R1_DIACI ATP synthase subunit delta, mitochondrial isoform X1 OS=Diaphorina citri OX=121845 GN=LOC103511460 PE=3 SV=2	1	5	1	1	54.4	21.656	125480	213980		169730	252890	105070		178980	0.948318	0.92429
A0A1S3D4U3	Uncharacterized protein LOC103511519	LOC103511519		tr|A0A1S3D4U3|A0A1S3D4U3_DIACI	tr|A0A1S3D4U3|A0A1S3D4U3_DIACI Uncharacterized protein LOC103511519 OS=Diaphorina citri OX=121845 GN=LOC103511519 PE=4 SV=2	1	7	4	4	14.3	67.85	3374800	2314600	2223800	2.63773e+06	1928500	1898700	1463400	1.76353e+06	1.49571	0.0935158
A0A1S3D4V5	28S ribosomal protein S28, mitochondrial	LOC103511528		tr|A0A1S3D4V5|A0A1S3D4V5_DIACI	tr|A0A1S3D4V5|A0A1S3D4V5_DIACI 28S ribosomal protein S28, mitochondrial OS=Diaphorina citri OX=121845 GN=LOC103511528 PE=4 SV=2	1	2	2	2	19.2	18.859	36773	36701	38854	37442.7	39380	63597	29210	44062.3	0.849766	0.552595
A0A1S3D4V7	non-specific serine/threonine protein kinase	LOC103511543		tr|A0A1S3D4V7|A0A1S3D4V7_DIACI;tr|A0A3Q0J2A7|A0A3Q0J2A7_DIACI;tr|A0A3Q0IXZ6|A0A3Q0IXZ6_DIACI	tr|A0A1S3D4V7|A0A1S3D4V7_DIACI non-specific serine/threonine protein kinase OS=Diaphorina citri OX=121845 GN=LOC103511543 PE=4 SV=1;tr|A0A3Q0J2A7|A0A3Q0J2A7_DIACI non-specific serine/threonine protein kinase OS=Diaphorina citri OX=121845 GN=LOC103511543 PE	3	8	8	8	25.7	54.717	560430	153920	434090	382813	113170	256460	322740	230790	1.65871	0.323437
A0A1S3D4W3	Cytosolic Fe-S cluster assembly factor NUBP1 homolog	LOC103511548	FUNCTION: Component of the cytosolic iron-sulfur (Fe/S) protein assembly (CIA) machinery. Required for maturation of extramitochondrial Fe-S proteins. The NUBP1-NUBP2 heterotetramer forms a Fe-S scaffold complex, mediating the de novo assembly of an Fe-S cluster and its transfer to target apoproteins. {ECO:0000256|HAMAP-Rule:MF_03038}.	tr|A0A1S3D4W3|A0A1S3D4W3_DIACI	tr|A0A1S3D4W3|A0A1S3D4W3_DIACI Cytosolic Fe-S cluster assembly factor NUBP1 homolog OS=Diaphorina citri OX=121845 GN=LOC103511548 PE=3 SV=1	1	2	2	2	14.5	33.129		39013	45679	42346	26018	48733	42701	39150.7	1.08162	0.749095
A0A1S3D4X6	DnaJ protein homolog 1	LOC103510628		tr|A0A1S3D4X6|A0A1S3D4X6_DIACI	tr|A0A1S3D4X6|A0A1S3D4X6_DIACI DnaJ protein homolog 1 OS=Diaphorina citri OX=121845 GN=LOC103510628 PE=4 SV=1	1	7	7	7	25.6	38.892	756240	505750	564760	608917	733560	557640	447740	579647	1.0505	0.807488
A0A1S3D4Y1	Uncharacterized protein LOC103511425 isoform X2	LOC103511425		tr|A0A1S3D4Y1|A0A1S3D4Y1_DIACI;tr|A0A3Q0IXL8|A0A3Q0IXL8_DIACI	tr|A0A1S3D4Y1|A0A1S3D4Y1_DIACI Uncharacterized protein LOC103511425 isoform X2 OS=Diaphorina citri OX=121845 GN=LOC103511425 PE=4 SV=1;tr|A0A3Q0IXL8|A0A3Q0IXL8_DIACI Uncharacterized protein LOC103511425 isoform X1 OS=Diaphorina citri OX=121845 GN=LOC103511	2	2	2	2	5.5	58.701	328250	74699	155980	186310	88861	9232.2	13045	37046.1	5.02913	0.132271
A0A1S3D4Y8	Protein mago nashi homolog isoform X1	LOC103511593		tr|A0A1S3D4Y8|A0A1S3D4Y8_DIACI	tr|A0A1S3D4Y8|A0A1S3D4Y8_DIACI Protein mago nashi homolog isoform X1 OS=Diaphorina citri OX=121845 GN=LOC103511593 PE=3 SV=1	1	1	1	1	10.1	17.44	106300	63968	76405	82224.3	51468	52504	50174	51382	1.60026	0.0703152
A0A1S3D517	Ectopic P granules protein 3-like	LOC103511621		tr|A0A1S3D517|A0A1S3D517_DIACI	tr|A0A1S3D517|A0A1S3D517_DIACI Ectopic P granules protein 3-like OS=Diaphorina citri OX=121845 GN=LOC103511621 PE=4 SV=1	1	1	1	1	4.3	51.713	59790	28871	38565	42408.7	32208	24384	33935	30175.7	1.40539	0.271196
A0A1S3D528	Uncharacterized protein LOC103511652	LOC103511652		tr|A0A1S3D528|A0A1S3D528_DIACI	tr|A0A1S3D528|A0A1S3D528_DIACI Uncharacterized protein LOC103511652 OS=Diaphorina citri OX=121845 GN=LOC103511652 PE=4 SV=1	1	4	4	4	41.7	16.17	892790	225650	274260	464233	220650	106910	195370	174310	2.66326	0.253372
A0A1S3D536	HD domain-containing protein 2	LOC103511647		tr|A0A1S3D536|A0A1S3D536_DIACI	tr|A0A1S3D536|A0A1S3D536_DIACI HD domain-containing protein 2 OS=Diaphorina citri OX=121845 GN=LOC103511647 PE=4 SV=1	1	5	5	5	44.4	18.863	591270	441650	459200	497373	539720	462390	330970	444360	1.1193	0.529441
A0A1S3D544	Inositol-1-monophosphatase	LOC103511680		tr|A0A1S3D544|A0A1S3D544_DIACI	tr|A0A1S3D544|A0A1S3D544_DIACI Inositol-1-monophosphatase OS=Diaphorina citri OX=121845 GN=LOC103511680 PE=3 SV=1	1	1	1	1	13.6	26.336	140310		52175	96242.5	10495		4937.7	7716.35	12.4725	0.182839
A0A3Q0IY66	Keratin, type II cytoskeletal 2 epidermal-like isoform X4	LOC103511685		tr|A0A3Q0IY66|A0A3Q0IY66_DIACI;tr|A0A1S4EE95|A0A1S4EE95_DIACI;tr|A0A1S3D6M8|A0A1S3D6M8_DIACI;tr|A0A1S3D545|A0A1S3D545_DIACI	tr|A0A3Q0IY66|A0A3Q0IY66_DIACI Keratin, type II cytoskeletal 2 epidermal-like isoform X4 OS=Diaphorina citri OX=121845 GN=LOC103511685 PE=4 SV=1;tr|A0A1S4EE95|A0A1S4EE95_DIACI Glycine-rich protein 2-like isoform X3 OS=Diaphorina citri OX=121845 GN=LOC10351	4	1	1	1	20.3	12.353	5756.9	3655.4	5973.2	5128.5	10422	36384	10756	19187.3	0.267286	0.178655
A0A1S3D546	Uncharacterized protein LOC103511661 isoform X1	LOC103511661		tr|A0A1S3D546|A0A1S3D546_DIACI;tr|A0A1S3D6L8|A0A1S3D6L8_DIACI	tr|A0A1S3D546|A0A1S3D546_DIACI Uncharacterized protein LOC103511661 isoform X1 OS=Diaphorina citri OX=121845 GN=LOC103511661 PE=3 SV=1;tr|A0A1S3D6L8|A0A1S3D6L8_DIACI Uncharacterized protein LOC103511661 isoform X2 OS=Diaphorina citri OX=121845 GN=LOC103511	2	6	6	6	37.4	32.317	428960	386400	367860	394407	218330	328800	371620	306250	1.28786	0.147116
A0A1S3D554	Probable N-acetyltransferase san	LOC103511692		tr|A0A1S3D554|A0A1S3D554_DIACI	tr|A0A1S3D554|A0A1S3D554_DIACI Probable N-acetyltransferase san OS=Diaphorina citri OX=121845 GN=LOC103511692 PE=4 SV=1	1	1	1	1	9	19.349		34967	43718	39342.5	12500	60999	42935	38811.3	1.01369	0.978964
A0A1S3D555	S-methyl-5-thioadenosine phosphorylase	LOC103511694	FUNCTION: Catalyzes the reversible phosphorylation of S-methyl-5'-thioadenosine (MTA) to adenine and 5-methylthioribose-1-phosphate. Involved in the breakdown of MTA, a major by-product of polyamine biosynthesis. Responsible for the first step in the methionine salvage pathway after MTA has been generated from S-adenosylmethionine. Has broad substrate specificity with 6-aminopurine nucleosides as…	tr|A0A1S3D555|A0A1S3D555_DIACI;tr|A0A3Q0IYB1|A0A3Q0IYB1_DIACI	tr|A0A1S3D555|A0A1S3D555_DIACI S-methyl-5-thioadenosine phosphorylase OS=Diaphorina citri OX=121845 GN=LOC103511694 PE=3 SV=1;tr|A0A3Q0IYB1|A0A3Q0IYB1_DIACI S-methyl-5-thioadenosine phosphorylase-like OS=Diaphorina citri OX=121845 GN=LOC103511697 PE=4 SV	2	10	10	10	55.5	31.067	577670	423010	523820	508167	627370	787040	612530	675647	0.752119	0.0804172
A0A3Q0IY71	Dedicator of cytokinesis protein 7 isoform X4	LOC103511696		tr|A0A3Q0IY71|A0A3Q0IY71_DIACI;tr|A0A1S3D559|A0A1S3D559_DIACI;tr|A0A3Q0IY64|A0A3Q0IY64_DIACI;tr|A0A1S4EEQ4|A0A1S4EEQ4_DIACI	tr|A0A3Q0IY71|A0A3Q0IY71_DIACI Dedicator of cytokinesis protein 7 isoform X4 OS=Diaphorina citri OX=121845 GN=LOC103511696 PE=3 SV=1;tr|A0A1S3D559|A0A1S3D559_DIACI Dedicator of cytokinesis protein 7 isoform X3 OS=Diaphorina citri OX=121845 GN=LOC103511696	4	2	2	2	2.2	228.45	58967	4598500	832700	1.83006e+06		593130	594850	593990	3.08095	0.543703
A0A1S3D572	Translin-associated protein X-like	LOC103511710		tr|A0A1S3D572|A0A1S3D572_DIACI;tr|A0A1S3D5F3|A0A1S3D5F3_DIACI	tr|A0A1S3D572|A0A1S3D572_DIACI Translin-associated protein X-like OS=Diaphorina citri OX=121845 GN=LOC103511710 PE=3 SV=1;tr|A0A1S3D5F3|A0A1S3D5F3_DIACI Translin-associated protein X-like OS=Diaphorina citri OX=121845 GN=LOC103511714 PE=4 SV=1	2	4	4	4	23.7	31.695	76374	72682	65392	71482.7	16557	43804	68115	42825.3	1.66917	0.133164
A0A1S3D580	Acireductone dioxygenase	LOC103511723	FUNCTION: Catalyzes the formation of formate and 2-keto-4-methylthiobutyrate (KMTB) from 1,2-dihydroxy-3-keto-5-methylthiopentene (DHK-MTPene). {ECO:0000256|HAMAP-Rule:MF_03154, ECO:0000256|SAAS:SAAS00003715}.	tr|A0A1S3D580|A0A1S3D580_DIACI	tr|A0A1S3D580|A0A1S3D580_DIACI Acireductone dioxygenase OS=Diaphorina citri OX=121845 GN=LOC103511723 PE=3 SV=1	1	6	6	6	37.8	22.423	1494800	979030	1096900	1.19024e+06	1150400	947640	773070	957037	1.24368	0.28773
A0A1S3D583	60S ribosomal protein L37a isoform X1	LOC103511721		tr|A0A1S3D583|A0A1S3D583_DIACI	tr|A0A1S3D583|A0A1S3D583_DIACI 60S ribosomal protein L37a isoform X1 OS=Diaphorina citri OX=121845 GN=LOC103511721 PE=3 SV=1	1	3	3	3	38	10.369	553880	775930	1028900	786237	645730	642880	653220	647277	1.21468	0.36861
A0A1S3D5A0	Macrophage migration inhibitory factor homolog	LOC103511645		tr|A0A1S3D5A0|A0A1S3D5A0_DIACI	tr|A0A1S3D5A0|A0A1S3D5A0_DIACI Macrophage migration inhibitory factor homolog OS=Diaphorina citri OX=121845 GN=LOC103511645 PE=3 SV=1	1	5	5	5	69.2	12.835	2315400	895530	759170	1.32337e+06	989960	1256400	825000	1.02379e+06	1.29262	0.590724
A0A1S3D5C8	cAMP-dependent protein kinase type II regulatory subunit-like	LOC103510899		tr|A0A1S3D5C8|A0A1S3D5C8_DIACI	tr|A0A1S3D5C8|A0A1S3D5C8_DIACI cAMP-dependent protein kinase type II regulatory subunit-like OS=Diaphorina citri OX=121845 GN=LOC103510899 PE=4 SV=1	1	6	3	3	50.3	22.051	266210	221130	227380	238240	244710	204520	183330	210853	1.12988	0.297138
A0A1S3D5D9	3-hydroxyisobutyrate dehydrogenase	LOC103510926		tr|A0A1S3D5D9|A0A1S3D5D9_DIACI;tr|A0A1S3D3W5|A0A1S3D3W5_DIACI	tr|A0A1S3D5D9|A0A1S3D5D9_DIACI 3-hydroxyisobutyrate dehydrogenase OS=Diaphorina citri OX=121845 GN=LOC103510926 PE=3 SV=1;tr|A0A1S3D3W5|A0A1S3D3W5_DIACI Probable 3-hydroxyisobutyrate dehydrogenase, mitochondrial OS=Diaphorina citri OX=121845 GN=LOC10351093	2	4	4	4	30.8	26.609	524360	267030	275660	355683	70637	471350	380720	307569	1.15643	0.761055
A0A1S3D5E1	Importin subunit alpha	LOC103511808		tr|A0A1S3D5E1|A0A1S3D5E1_DIACI	tr|A0A1S3D5E1|A0A1S3D5E1_DIACI Importin subunit alpha OS=Diaphorina citri OX=121845 GN=LOC103511808 PE=3 SV=1	1	12	12	12	43.6	56.854	177300	687240	836300	566947	498130	587500	568430	551353	1.02828	0.941993
A0A1S3D5F2	Protein unzipped	LOC103511810		tr|A0A1S3D5F2|A0A1S3D5F2_DIACI	tr|A0A1S3D5F2|A0A1S3D5F2_DIACI Protein unzipped OS=Diaphorina citri OX=121845 GN=LOC103511810 PE=4 SV=1	1	5	5	5	18.8	53.068	392610	270350	292980	318647	278600	335820	267240	293887	1.08425	0.596699
A0A1S3D5F4	Polyadenylate-binding protein 4	LOC103511827		tr|A0A1S3D5F4|A0A1S3D5F4_DIACI;tr|A0A3Q0IYE9|A0A3Q0IYE9_DIACI	tr|A0A1S3D5F4|A0A1S3D5F4_DIACI Polyadenylate-binding protein 4 OS=Diaphorina citri OX=121845 GN=LOC103511827 PE=3 SV=1;tr|A0A3Q0IYE9|A0A3Q0IYE9_DIACI Uncharacterized protein LOC103511826 OS=Diaphorina citri OX=121845 GN=LOC103511826 PE=4 SV=1	2	7	7	7	27.7	32.786	254260	1136100	914320	768227	1215900	1202100	1055300	1.15777e+06	0.663542	0.222252
A0A1S3D5H8	Protein maelstrom homolog	LOC103511877		tr|A0A1S3D5H8|A0A1S3D5H8_DIACI	tr|A0A1S3D5H8|A0A1S3D5H8_DIACI Protein maelstrom homolog OS=Diaphorina citri OX=121845 GN=LOC103511877 PE=3 SV=1	1	5	5	5	22.6	49.817	234290	245470	229220	236327	41086	284530	171440	165685	1.42636	0.373033
A0A1S3D5I2	Ras-related protein Rab-11A	LOC103511752		tr|A0A1S3D5I2|A0A1S3D5I2_DIACI	tr|A0A1S3D5I2|A0A1S3D5I2_DIACI Ras-related protein Rab-11A OS=Diaphorina citri OX=121845 GN=LOC103511752 PE=4 SV=1	1	4	4	4	21.9	25.363	707120	888410	608100	734543	524730	484890	510420	506680	1.44972	0.0514369
A0A1S3D5J2	Uncharacterized protein LOC103511903	LOC103511903		tr|A0A1S3D5J2|A0A1S3D5J2_DIACI	tr|A0A1S3D5J2|A0A1S3D5J2_DIACI Uncharacterized protein LOC103511903 OS=Diaphorina citri OX=121845 GN=LOC103511903 PE=4 SV=2	1	1	1	1	6.6	21.032	2477.5	13112	4811.9	6800.47	9175	41964		25569.5	0.26596	0.241971
A0A1S3D5M2	Thiosulfate sulfurtransferase, mitochondrial isoform X3	LOC103511921		tr|A0A1S3D5M2|A0A1S3D5M2_DIACI;tr|A0A1S4EF84|A0A1S4EF84_DIACI;tr|A0A1S3D5K2|A0A1S3D5K2_DIACI	tr|A0A1S3D5M2|A0A1S3D5M2_DIACI Thiosulfate sulfurtransferase, mitochondrial isoform X3 OS=Diaphorina citri OX=121845 GN=LOC103511921 PE=4 SV=1;tr|A0A1S4EF84|A0A1S4EF84_DIACI Thiosulfate sulfurtransferase, mitochondrial isoform X2 OS=Diaphorina citri OX=121	3	1	1	1	26.7	15.099	105750	96120	105070	102313	119050	15253	72410	68904.3	1.48486	0.330312
A0A1S3D5S2	Venom acid phosphatase Acph-1 isoform X1	LOC103511891		tr|A0A1S3D5S2|A0A1S3D5S2_DIACI;tr|A0A1S3D5K3|A0A1S3D5K3_DIACI;tr|Q0PWU9|Q0PWU9_DIACI	tr|A0A1S3D5S2|A0A1S3D5S2_DIACI Venom acid phosphatase Acph-1 isoform X1 OS=Diaphorina citri OX=121845 GN=LOC103511891 PE=4 SV=1;tr|A0A1S3D5K3|A0A1S3D5K3_DIACI Venom acid phosphatase Acph-1 isoform X2 OS=Diaphorina citri OX=121845 GN=LOC103511891 PE=4 SV=1;	3	17	17	17	53.9	48.162	23392000	20667000	19134000	2.10643e+07	19257000	17620000	19877000	18918000	1.11345	0.204026
A0A1S3D5K6	Uncharacterized protein LOC103511015	LOC103511015		tr|A0A1S3D5K6|A0A1S3D5K6_DIACI;tr|A0A7T3R140|A0A7T3R140_DIACI;tr|A0A1S3DBF3|A0A1S3DBF3_DIACI	tr|A0A1S3D5K6|A0A1S3D5K6_DIACI Uncharacterized protein LOC103511015 OS=Diaphorina citri OX=121845 GN=LOC103511015 PE=4 SV=2;tr|A0A7T3R140|A0A7T3R140_DIACI Chemosensory protein 3 OS=Diaphorina citri OX=121845 GN=CSP3 PE=2 SV=1;tr|A0A1S3DBF3|A0A1S3DBF3_DIACI	3	3	3	3	9.5	54.005	255650	260680	223070	246467	144140	186610	227840	186197	1.32369	0.0884491
A0A1S3D5L1	Trehalase	LOC103511933		tr|A0A1S3D5L1|A0A1S3D5L1_DIACI;tr|A0A1S3D5U6|A0A1S3D5U6_DIACI;tr|A0A1S3D5M3|A0A1S3D5M3_DIACI;tr|A0A1S3D5V1|A0A1S3D5V1_DIACI	tr|A0A1S3D5L1|A0A1S3D5L1_DIACI Trehalase OS=Diaphorina citri OX=121845 GN=LOC103511933 PE=3 SV=1;tr|A0A1S3D5U6|A0A1S3D5U6_DIACI Trehalase OS=Diaphorina citri OX=121845 GN=LOC103511933 PE=3 SV=1;tr|A0A1S3D5M3|A0A1S3D5M3_DIACI Trehalase OS=Diaphorina citri O	4	11	11	11	25.6	70.286	1157800	800130	722310	893413	596370	695110	707190	666223	1.34101	0.176535
A0A1S3D5L9	Moesin/ezrin/radixin homolog 1-like	LOC103511039		tr|A0A1S3D5L9|A0A1S3D5L9_DIACI;tr|A0A3Q0IWU6|A0A3Q0IWU6_DIACI	tr|A0A1S3D5L9|A0A1S3D5L9_DIACI Moesin/ezrin/radixin homolog 1-like OS=Diaphorina citri OX=121845 GN=LOC103511039 PE=4 SV=1;tr|A0A3Q0IWU6|A0A3Q0IWU6_DIACI Moesin/ezrin/radixin homolog 1-like OS=Diaphorina citri OX=121845 GN=LOC113468180 PE=4 SV=1	2	2	2	2	37.5	8.3145		615250	251310	433280	482760	547970	592560	541097	0.800744	0.502181
A0A1S3D5P3	Trifunctional enzyme subunit beta, mitochondrial	LOC103511957		tr|A0A1S3D5P3|A0A1S3D5P3_DIACI	tr|A0A1S3D5P3|A0A1S3D5P3_DIACI Trifunctional enzyme subunit beta, mitochondrial OS=Diaphorina citri OX=121845 GN=LOC103511957 PE=3 SV=1	1	16	16	16	55.1	50.838	6903100	9832300	8263500	8.33297e+06	7316300	7983800	8710200	8.00343e+06	1.04117	0.742853
A0A1S3D5P7	Glycerophosphocholine phosphodiesterase GPCPD1 isoform X3	LOC103511955		tr|A0A1S3D5P7|A0A1S3D5P7_DIACI;tr|A0A1S3D5P8|A0A1S3D5P8_DIACI;tr|A0A3Q0IYX4|A0A3Q0IYX4_DIACI	tr|A0A1S3D5P7|A0A1S3D5P7_DIACI Glycerophosphocholine phosphodiesterase GPCPD1 isoform X3 OS=Diaphorina citri OX=121845 GN=LOC103511955 PE=4 SV=1;tr|A0A1S3D5P8|A0A1S3D5P8_DIACI Glycerophosphocholine phosphodiesterase GPCPD1 isoform X2 OS=Diaphorina citri OX	3	7	7	7	17.9	69.202	99400	97601	161300	119434	112250	140990	160890	138043	0.86519	0.502077
A0A1S3D5W4	Diacylglycerol O-acyltransferase 1-like	LOC103512085		tr|A0A1S3D5W4|A0A1S3D5W4_DIACI	tr|A0A1S3D5W4|A0A1S3D5W4_DIACI Diacylglycerol O-acyltransferase 1-like OS=Diaphorina citri OX=121845 GN=LOC103512085 PE=3 SV=1	1	2	2	2	60.8	9.1104	25154	28306		26730		25271	38074	31672.5	0.84395	0.531625
A0A1S3D5W7	Dynein light chain roadblock	LOC103512086		tr|A0A1S3D5W7|A0A1S3D5W7_DIACI	tr|A0A1S3D5W7|A0A1S3D5W7_DIACI Dynein light chain roadblock OS=Diaphorina citri OX=121845 GN=LOC103512086 PE=3 SV=1	1	3	3	3	50.5	10.749	146970	321200	255550	241240	254180	273840	235910	254643	0.947364	0.809203
A0A1S3D5Y9	Flocculation protein FLO11-like	LOC103511253		tr|A0A1S3D5Y9|A0A1S3D5Y9_DIACI;tr|A0A1S4EDV2|A0A1S4EDV2_DIACI	tr|A0A1S3D5Y9|A0A1S3D5Y9_DIACI Flocculation protein FLO11-like OS=Diaphorina citri OX=121845 GN=LOC103511253 PE=4 SV=1	2	5	5	5	7.6	106.41	345220	342700	299180	329033	503250	380380	304550	396060	0.830766	0.325031
A0A1S3D5Z9	Mesencephalic astrocyte-derived neurotrophic factor homolog	LOC103511268		tr|A0A1S3D5Z9|A0A1S3D5Z9_DIACI	tr|A0A1S3D5Z9|A0A1S3D5Z9_DIACI Mesencephalic astrocyte-derived neurotrophic factor homolog OS=Diaphorina citri OX=121845 GN=LOC103511268 PE=3 SV=1	1	5	5	5	38.1	20.108	230620	638640	639920	503060	510090	714130	658010	627410	0.801804	0.451458
A0A1S3D610	Serine protease K12H4.7	LOC103512024		tr|A0A1S3D610|A0A1S3D610_DIACI	tr|A0A1S3D610|A0A1S3D610_DIACI Serine protease K12H4.7 OS=Diaphorina citri OX=121845 GN=LOC103512024 PE=3 SV=1	1	14	14	14	53.1	40.425	1301600	1327100	1573900	1.40087e+06	1399200	1454000	1604700	1.48597e+06	0.942731	0.468497
A0A1S3D612	Protein kinase C and casein kinase substrate in neurons protein 1-like	LOC103512194		tr|A0A1S3D612|A0A1S3D612_DIACI	tr|A0A1S3D612|A0A1S3D612_DIACI Protein kinase C and casein kinase substrate in neurons protein 1-like OS=Diaphorina citri OX=121845 GN=LOC103512194 PE=4 SV=1	1	2	2	2	33.6	13.898	4478.1	128080	178980	103846	152880	161850	138420	151050	0.687494	0.41746
A0A1S3D613	Protein kinase C and casein kinase II substrate protein 3-like isoform X1	LOC103512187		tr|A0A1S3D613|A0A1S3D613_DIACI;tr|A0A1S3D621|A0A1S3D621_DIACI;tr|A0A1S3DRR5|A0A1S3DRR5_DIACI	tr|A0A1S3D613|A0A1S3D613_DIACI Protein kinase C and casein kinase II substrate protein 3-like isoform X1 OS=Diaphorina citri OX=121845 GN=LOC103512187 PE=4 SV=1;tr|A0A1S3D621|A0A1S3D621_DIACI Protein kinase C and casein kinase substrate in neurons protein	3	5	5	4	18.7	37.244	286610	239110	260000	261907	587600	24963	414840	342468	0.764763	0.654671
A0A1S4ERT5	L-2-hydroxyglutarate dehydrogenase, mitochondrial-like	LOC103524011		tr|A0A1S4ERT5|A0A1S4ERT5_DIACI;tr|A0A3Q0J4B3|A0A3Q0J4B3_DIACI;tr|A0A1S3D622|A0A1S3D622_DIACI	tr|A0A1S4ERT5|A0A1S4ERT5_DIACI L-2-hydroxyglutarate dehydrogenase, mitochondrial-like OS=Diaphorina citri OX=121845 GN=LOC103524011 PE=4 SV=1;tr|A0A3Q0J4B3|A0A3Q0J4B3_DIACI L-2-hydroxyglutarate dehydrogenase, mitochondrial isoform X3 OS=Diaphorina citri OX	3	2	2	2	13.5	28.378	50057	25572	26395	34008	75869	28321	40738	48309.3	0.703963	0.431002
A0A1S3D625	Polyhomeotic-proximal chromatin protein	LOC103512053		tr|A0A1S3D625|A0A1S3D625_DIACI	tr|A0A1S3D625|A0A1S3D625_DIACI Polyhomeotic-proximal chromatin protein OS=Diaphorina citri OX=121845 GN=LOC103512053 PE=4 SV=1	1	2	2	2	5.1	78.935	52103	29011	36342	39152	37909	28755	46895	37853	1.03432	0.887154
A0A1S3D628	Glutathione S-transferase isoform X2	LOC103512218		tr|A0A1S3D628|A0A1S3D628_DIACI;tr|A0A1S3D637|A0A1S3D637_DIACI;tr|A0A482LUS4|A0A482LUS4_DIACI	tr|A0A1S3D628|A0A1S3D628_DIACI Glutathione S-transferase isoform X2 OS=Diaphorina citri OX=121845 GN=LOC103512218 PE=4 SV=1;tr|A0A1S3D637|A0A1S3D637_DIACI Glutathione S-transferase isoform X1 OS=Diaphorina citri OX=121845 GN=LOC103512218 PE=4 SV=1	3	8	7	4	37.9	23.797	862050	453350	518340	611247	521290	439520	563220	508010	1.20322	0.477543
A0A1S3D629	Calcineurin subunit B type 2	LOC103511326		tr|A0A1S3D629|A0A1S3D629_DIACI	tr|A0A1S3D629|A0A1S3D629_DIACI Calcineurin subunit B type 2 OS=Diaphorina citri OX=121845 GN=LOC103511326 PE=3 SV=1	1	3	3	3	42.4	13.665	225490	284690	353500	287893	394040	246630	299140	313270	0.918994	0.678281
A0A1S3D647	SAP domain-containing ribonucleoprotein isoform X2	LOC103512243		tr|A0A1S3D647|A0A1S3D647_DIACI;tr|A0A1S3D643|A0A1S3D643_DIACI	tr|A0A1S3D647|A0A1S3D647_DIACI SAP domain-containing ribonucleoprotein isoform X2 OS=Diaphorina citri OX=121845 GN=LOC103512243 PE=4 SV=1;tr|A0A1S3D643|A0A1S3D643_DIACI SAP domain-containing ribonucleoprotein isoform X1 OS=Diaphorina citri OX=121845 GN=LOC	2	1	1	1	6.5	33.011	41374	27693	28124	32397	36316	34006	31451	33924.3	0.954978	0.761732
A0A1S3D648	26S proteasome non-ATPase regulatory subunit 2	LOC103512234	FUNCTION: Component of the 26S proteasome, a multiprotein complex involved in the ATP-dependent degradation of ubiquitinated proteins. This complex plays a key role in the maintenance of protein homeostasis by removing misfolded or damaged proteins, which could impair cellular functions, and by removing proteins whose functions are no longer required. Therefore, the proteasome participates in num…	tr|A0A1S3D648|A0A1S3D648_DIACI	tr|A0A1S3D648|A0A1S3D648_DIACI 26S proteasome non-ATPase regulatory subunit 2 OS=Diaphorina citri OX=121845 GN=LOC103512234 PE=3 SV=1	1	23	23	23	38.3	100.92	1010700	1454800	1567900	1.34447e+06	1002500	1295100	1427200	1241600	1.08285	0.651905
A0A1S3D666	Pseudouridine-5-phosphatase-like	LOC103512259		tr|A0A1S3D666|A0A1S3D666_DIACI	tr|A0A1S3D666|A0A1S3D666_DIACI Pseudouridine-5-phosphatase-like OS=Diaphorina citri OX=121845 GN=LOC103512259 PE=4 SV=1	1	4	4	4	30.9	27.552	88038	289360	212320	196573	182900	316570	317430	272300	0.721897	0.36249
A0A1S3D669	Mitochondrial-processing peptidase subunit beta	LOC103512280		tr|A0A1S3D669|A0A1S3D669_DIACI;tr|A0A3Q0IZB5|A0A3Q0IZB5_DIACI	tr|A0A1S3D669|A0A1S3D669_DIACI Mitochondrial-processing peptidase subunit beta OS=Diaphorina citri OX=121845 GN=LOC103512280 PE=4 SV=2	2	18	18	18	74.6	43.199	25105000	29972000	32738000	2.92717e+07	25662000	23407000	23998000	2.43557e+07	1.20184	0.10261
A0A1S3D683	Plasminogen activator inhibitor 1 RNA-binding protein	LOC103511418		tr|A0A1S3D683|A0A1S3D683_DIACI	tr|A0A1S3D683|A0A1S3D683_DIACI Plasminogen activator inhibitor 1 RNA-binding protein OS=Diaphorina citri OX=121845 GN=LOC103511418 PE=4 SV=1	1	5	5	5	24.5	26.192	1088000	598040	730560	805533	782420	570190	458130	603580	1.33459	0.311559
A0A1S3D693	Glucosamine-6-phosphate isomerase-like	LOC103512195		tr|A0A1S3D693|A0A1S3D693_DIACI	tr|A0A1S3D693|A0A1S3D693_DIACI Glucosamine-6-phosphate isomerase-like OS=Diaphorina citri OX=121845 GN=LOC103512195 PE=4 SV=1	1	2	1	1	23.9	17.298	29612	51589	49010	43403.7	29390	65890	48960	48080	0.902738	0.729807
A0A1S3D6C2	Vacuolar protein sorting-associated protein 4B-like	LOC103512387		tr|A0A1S3D6C2|A0A1S3D6C2_DIACI;tr|A0A3Q0IZN5|A0A3Q0IZN5_DIACI	tr|A0A1S3D6C2|A0A1S3D6C2_DIACI Vacuolar protein sorting-associated protein 4B-like OS=Diaphorina citri OX=121845 GN=LOC103512387 PE=4 SV=2;tr|A0A3Q0IZN5|A0A3Q0IZN5_DIACI Vacuolar protein sorting-associated protein 4B-like OS=Diaphorina citri OX=121845 GN=L	2	2	2	2	18.9	13.397	25455	30882	21855	26064	8496.8	51691	23391	27859.6	0.935548	0.896315
A0A1S3D6D6	Succinate-semialdehyde dehydrogenase, mitochondrial-like	LOC103512390		tr|A0A1S3D6D6|A0A1S3D6D6_DIACI	tr|A0A1S3D6D6|A0A1S3D6D6_DIACI Succinate-semialdehyde dehydrogenase, mitochondrial-like OS=Diaphorina citri OX=121845 GN=LOC103512390 PE=3 SV=1	1	11	11	11	57.5	34.558	1736500	969520	1038800	1.24827e+06	909190	755680	843730	836200	1.49279	0.173198
A0A1S3D6F7	Uncharacterized protein LOC103512422	LOC103512422		tr|A0A1S3D6F7|A0A1S3D6F7_DIACI	tr|A0A1S3D6F7|A0A1S3D6F7_DIACI Uncharacterized protein LOC103512422 OS=Diaphorina citri OX=121845 GN=LOC103512422 PE=4 SV=1	1	3	3	3	22.8	22.312	143260	145820	116250	135110	272990	138170	159190	190117	0.710669	0.269355
A0A1S3D6H8	Transmembrane 9 superfamily member	LOC103512457		tr|A0A1S3D6H8|A0A1S3D6H8_DIACI	tr|A0A1S3D6H8|A0A1S3D6H8_DIACI Transmembrane 9 superfamily member OS=Diaphorina citri OX=121845 GN=LOC103512457 PE=3 SV=2	1	2	2	1	7.8	42.617	142500	52623	100070	98397.7	50497	31713	87663	56624.3	1.73773	0.245571
A0A3Q0J4A4	Sialin-like isoform X1	LOC113465347		tr|A0A3Q0J4A4|A0A3Q0J4A4_DIACI;tr|A0A1S3D6I1|A0A1S3D6I1_DIACI	tr|A0A3Q0J4A4|A0A3Q0J4A4_DIACI Sialin-like isoform X1 OS=Diaphorina citri OX=121845 GN=LOC113465347 PE=4 SV=1;tr|A0A1S3D6I1|A0A1S3D6I1_DIACI Sialin OS=Diaphorina citri OX=121845 GN=LOC103512495 PE=4 SV=1	2	2	2	2	9.2	28.116	230490	143970	128870	167777	116350	102640	113180	110723	1.51528	0.148482
A0A1S3D6S4	DnaJ homolog shv isoform X2	LOC103512511		tr|A0A1S3D6S4|A0A1S3D6S4_DIACI;tr|A0A1S3D6J2|A0A1S3D6J2_DIACI	tr|A0A1S3D6S4|A0A1S3D6S4_DIACI DnaJ homolog shv isoform X2 OS=Diaphorina citri OX=121845 GN=LOC103512511 PE=4 SV=1;tr|A0A1S3D6J2|A0A1S3D6J2_DIACI DnaJ homolog shv isoform X1 OS=Diaphorina citri OX=121845 GN=LOC103512511 PE=4 SV=1	2	7	7	7	26.9	41.189	675750	526850	539080	580560	586610	593250	425120	534993	1.08517	0.565299
A0A1S3D6L1	Small ribosomal subunit protein RACK1	LOC103512534		tr|A0A1S3D6L1|A0A1S3D6L1_DIACI;tr|Q0PWT4|Q0PWT4_DIACI;tr|A0A3Q0J4C9|A0A3Q0J4C9_DIACI;tr|A0A3Q0IZZ1|A0A3Q0IZZ1_DIACI;tr|A0A3Q0ISS4|A0A3Q0ISS4_DIACI	tr|A0A1S3D6L1|A0A1S3D6L1_DIACI Small ribosomal subunit protein RACK1 OS=Diaphorina citri OX=121845 GN=LOC103512534 PE=3 SV=1	5	18	18	18	82.8	35.824	4726600	5464500	6517100	5569400	3275100	4608300	4931800	4.27173e+06	1.30378	0.148359
A0A1S3D6N8	Proteasome subunit alpha type-2	LOC103512444		tr|A0A1S3D6N8|A0A1S3D6N8_DIACI;tr|A0A3Q0IZT6|A0A3Q0IZT6_DIACI	tr|A0A1S3D6N8|A0A1S3D6N8_DIACI Proteasome subunit alpha type-2 OS=Diaphorina citri OX=121845 GN=LOC103512444 PE=3 SV=1	2	9	9	9	65.2	32.979	1078400	1236600	1297300	1204100	958700	1088100	1151300	1.06603e+06	1.12951	0.185407
A0A1S3D6P1	hydroxyacid-oxoacid transhydrogenase	LOC103512568		tr|A0A1S3D6P1|A0A1S3D6P1_DIACI	tr|A0A1S3D6P1|A0A1S3D6P1_DIACI hydroxyacid-oxoacid transhydrogenase OS=Diaphorina citri OX=121845 GN=LOC103512568 PE=3 SV=1	1	14	14	14	52.1	50.949	1419600	5264300	3046400	3.24343e+06	2847400	2719800	2259800	2609000	1.24317	0.603975
A0A1S3D849	Low molecular weight phosphotyrosine protein phosphatase 1-like isoform X2	LOC103512551		tr|A0A1S3D849|A0A1S3D849_DIACI;tr|A0A1S3D6P2|A0A1S3D6P2_DIACI	tr|A0A1S3D849|A0A1S3D849_DIACI Low molecular weight phosphotyrosine protein phosphatase 1-like isoform X2 OS=Diaphorina citri OX=121845 GN=LOC103512551 PE=4 SV=1;tr|A0A1S3D6P2|A0A1S3D6P2_DIACI acid phosphatase OS=Diaphorina citri OX=121845 GN=LOC103512551	2	2	2	2	14.6	23.686	6603.4	7486.5	63148	25746	21400	46363	15402	27721.7	0.928731	0.929463
A0A1S4EFH8	Uncharacterized protein LOC103512459	LOC103512459		tr|A0A1S4EFH8|A0A1S4EFH8_DIACI;tr|A0A1S3D6P8|A0A1S3D6P8_DIACI	tr|A0A1S4EFH8|A0A1S4EFH8_DIACI Uncharacterized protein LOC103512459 OS=Diaphorina citri OX=121845 GN=LOC103512459 PE=4 SV=1;tr|A0A1S3D6P8|A0A1S3D6P8_DIACI Uncharacterized protein LOC103512462 OS=Diaphorina citri OX=121845 GN=LOC103512462 PE=4 SV=1	2	1	1	1	9.4	16.333	45702	26962		36332	490350	48844	52465	197220	0.184221	0.457928
A0A1S3D6Q0	Protein app1-like	LOC103511706		tr|A0A1S3D6Q0|A0A1S3D6Q0_DIACI	tr|A0A1S3D6Q0|A0A1S3D6Q0_DIACI Protein app1-like OS=Diaphorina citri OX=121845 GN=LOC103511706 PE=4 SV=1	1	1	1	1	10.3	30.221	81265	159750	133670	124895	95618	127480	100540	107879	1.15773	0.535208
A0A1S3D6R4	UPF0160 protein isoform X1	LOC103512494		tr|A0A1S3D6R4|A0A1S3D6R4_DIACI	tr|A0A1S3D6R4|A0A1S3D6R4_DIACI UPF0160 protein isoform X1 OS=Diaphorina citri OX=121845 GN=LOC103512494 PE=3 SV=1	1	4	4	4	16	39.54	109310	108500	68869	95559.7	93725	96389	98336	96150	0.99386	0.967007
A0A1S3D6R6	Catalase-like	LOC103512632		tr|A0A1S3D6R6|A0A1S3D6R6_DIACI	tr|A0A1S3D6R6|A0A1S3D6R6_DIACI Catalase-like OS=Diaphorina citri OX=121845 GN=LOC103512632 PE=4 SV=1	1	5	1	0	71.1	12.521	2270600	1564100	1402800	1.74583e+06	1718100	1391200	1124700	1.41133e+06	1.23701	0.350783
A0A1S3D6U7	Immunoglobulin-binding protein 1	LOC103512543		tr|A0A1S3D6U7|A0A1S3D6U7_DIACI	tr|A0A1S3D6U7|A0A1S3D6U7_DIACI Immunoglobulin-binding protein 1 OS=Diaphorina citri OX=121845 GN=LOC103512543 PE=4 SV=1	1	2	2	2	9.8	23.02	121250	63784	57519	80851	90272	58484	61819	70191.7	1.15186	0.662434
A0A1S3D6V2	Uncharacterized protein LOC103512692	LOC103512692		tr|A0A1S3D6V2|A0A1S3D6V2_DIACI	tr|A0A1S3D6V2|A0A1S3D6V2_DIACI Uncharacterized protein LOC103512692 OS=Diaphorina citri OX=121845 GN=LOC103512692 PE=4 SV=1	1	3	3	3	26.3	22.709	15969	63117	24659	34581.7	8837.5	31986	28462	23095.2	1.49736	0.51689
A0A1S3D6V9	54S ribosomal protein L12, mitochondrial	LOC103512703		tr|A0A1S3D6V9|A0A1S3D6V9_DIACI;tr|A0A1S4EBY1|A0A1S4EBY1_DIACI	tr|A0A1S3D6V9|A0A1S3D6V9_DIACI 54S ribosomal protein L12, mitochondrial OS=Diaphorina citri OX=121845 GN=LOC103512703 PE=4 SV=1;tr|A0A1S4EBY1|A0A1S4EBY1_DIACI Uncharacterized protein LOC108252404 OS=Diaphorina citri OX=121845 GN=LOC108252404 PE=4 SV=1	2	4	4	4	36.5	10.412	456920	336150	278300	357123	490470	364190	315660	390107	0.91545	0.679055
A0A1S3D6W1	Twitchin-like	LOC103512720		tr|A0A1S3D6W1|A0A1S3D6W1_DIACI	tr|A0A1S3D6W1|A0A1S3D6W1_DIACI Twitchin-like OS=Diaphorina citri OX=121845 GN=LOC103512720 PE=4 SV=1	1	13	1	1	53.4	33.617	629110	531390	428260	529587	933050	463260	585680	660663	0.801598	0.437641
A0A1S3D6W9	Alpha-1,3/1,6-mannosyltransferase ALG2	LOC103512674		tr|A0A1S3D6W9|A0A1S3D6W9_DIACI	tr|A0A1S3D6W9|A0A1S3D6W9_DIACI Alpha-1,3/1,6-mannosyltransferase ALG2 OS=Diaphorina citri OX=121845 GN=LOC103512674 PE=3 SV=1	1	4	4	4	16.4	46.708	29624	74030	177140	93598	27747	69883	104700	67443.3	1.3878	0.622002
A0A1S3D6Z9	Malectin	LOC103512742		tr|A0A1S3D6Z9|A0A1S3D6Z9_DIACI	tr|A0A1S3D6Z9|A0A1S3D6Z9_DIACI Malectin OS=Diaphorina citri OX=121845 GN=LOC103512742 PE=3 SV=1	1	8	8	8	48.3	29.874	559310	462840	583450	535200	449760	492720	520510	487663	1.09748	0.323004
A0A1S3D717	Serine/threonine-protein phosphatase	LOC103512815		tr|A0A1S3D717|A0A1S3D717_DIACI	tr|A0A1S3D717|A0A1S3D717_DIACI Serine/threonine-protein phosphatase OS=Diaphorina citri OX=121845 GN=LOC103512815 PE=3 SV=1	1	2	1	1	7.3	37.29	383020	247880	280500	303800	204730	228040	213890	215553	1.4094	0.0993067
A0A1S3D763	Tubulin-folding cofactor B	LOC103512889		tr|A0A1S3D763|A0A1S3D763_DIACI	tr|A0A1S3D763|A0A1S3D763_DIACI Tubulin-folding cofactor B OS=Diaphorina citri OX=121845 GN=LOC103512889 PE=4 SV=1	1	3	3	3	15.4	27.745	45342	70293	79378	65004.3	119320	106530	80155	102002	0.637287	0.0738846
A0A1S3D787	Homocysteine S-methyltransferase 2-like	LOC103512891		tr|A0A1S3D787|A0A1S3D787_DIACI;tr|A0A3Q0J0N3|A0A3Q0J0N3_DIACI	tr|A0A1S3D787|A0A1S3D787_DIACI Homocysteine S-methyltransferase 2-like OS=Diaphorina citri OX=121845 GN=LOC103512891 PE=4 SV=1	2	6	6	6	33.8	35.321	254120	198350	192580	215017	268510	249130	350170	289270	0.743308	0.112754
A0A1S3D7B8	Coiled-coil-helix-coiled-coil-helix domain-containing protein 1	LOC103512975		tr|A0A1S3D7B8|A0A1S3D7B8_DIACI	tr|A0A1S3D7B8|A0A1S3D7B8_DIACI Coiled-coil-helix-coiled-coil-helix domain-containing protein 1 OS=Diaphorina citri OX=121845 GN=LOC103512975 PE=4 SV=1	1	2	2	2	16.7	14.59	42409	14124	18474	25002.3	16821	13453	23020	17764.7	1.40742	0.476744
A0A1S3D7C6	Uncharacterized protein LOC103512961	LOC103512961		tr|A0A1S3D7C6|A0A1S3D7C6_DIACI	tr|A0A1S3D7C6|A0A1S3D7C6_DIACI Uncharacterized protein LOC103512961 OS=Diaphorina citri OX=121845 GN=LOC103512961 PE=4 SV=1	1	1	1	1	18.2	18.368		22691	2857.3	12774.1	29183	46755	32338	36092	0.353933	0.105645
A0A1S3D7F9	Alpha-1,4 glucan phosphorylase	LOC103512901	FUNCTION: Phosphorylase is an important allosteric enzyme in carbohydrate metabolism. Enzymes from different sources differ in their regulatory mechanisms and in their natural substrates. However, all known phosphorylases share catalytic and structural properties. {ECO:0000256|RuleBase:RU000587}.	tr|A0A1S3D7F9|A0A1S3D7F9_DIACI	tr|A0A1S3D7F9|A0A1S3D7F9_DIACI Alpha-1,4 glucan phosphorylase OS=Diaphorina citri OX=121845 GN=LOC103512901 PE=3 SV=1	1	3	3	3	61.9	8.9323	1077500	916300	972960	988920	729050	649630	1031300	803327	1.23103	0.213239
A0A1S3D7G1	DnaJ homolog subfamily C member 28-like	LOC103512117		tr|A0A1S3D7G1|A0A1S3D7G1_DIACI	tr|A0A1S3D7G1|A0A1S3D7G1_DIACI DnaJ homolog subfamily C member 28-like OS=Diaphorina citri OX=121845 GN=LOC103512117 PE=4 SV=1	1	1	1	1	10.9	18.157	18677	49903	25007	31195.7	20862		20685	20773.5	1.5017	0.459187
A0A1S3D7J3	Malate dehydrogenase	LOC103513073		tr|A0A1S3D7J3|A0A1S3D7J3_DIACI	tr|A0A1S3D7J3|A0A1S3D7J3_DIACI Malate dehydrogenase OS=Diaphorina citri OX=121845 GN=LOC103513073 PE=3 SV=1	1	9	9	7	79.4	16.824	22678000	15657000	16174000	1.81697e+07	13578000	11605000	13108000	1.27637e+07	1.42355	0.0816666
A0A1S3D7K2	eIF-2B GDP-GTP exchange factor subunit epsilon	LOC103512974		tr|A0A1S3D7K2|A0A1S3D7K2_DIACI	tr|A0A1S3D7K2|A0A1S3D7K2_DIACI eIF-2B GDP-GTP exchange factor subunit epsilon OS=Diaphorina citri OX=121845 GN=LOC103512974 PE=3 SV=1	1	3	3	3	6.4	70.802	36044	84382	53191	57872.3	30254	54532	65854	50213.3	1.15253	0.686221
A0A1S3D7L4	Apolipoprotein D-like	LOC103513091		tr|A0A1S3D7L4|A0A1S3D7L4_DIACI	tr|A0A1S3D7L4|A0A1S3D7L4_DIACI Apolipoprotein D-like OS=Diaphorina citri OX=121845 GN=LOC103513091 PE=4 SV=1	1	8	8	8	47.3	23.438	10247000	5912300	9441100	8.53347e+06	7904300	5028600	3114500	5.34913e+06	1.5953	0.173596
A0A1S3D7M0	NADH dehydrogenase [ubiquinone] iron-sulfur protein 3, mitochondrial	LOC103513123		tr|A0A1S3D7M0|A0A1S3D7M0_DIACI	tr|A0A1S3D7M0|A0A1S3D7M0_DIACI NADH dehydrogenase [ubiquinone] iron-sulfur protein 3, mitochondrial OS=Diaphorina citri OX=121845 GN=LOC103513123 PE=3 SV=1	1	14	14	11	70.2	30.776	12651000	9103400	8555300	1.01032e+07	7875600	7113100	6085000	7.02457e+06	1.43827	0.0902506
A0A1S3D7P9	Multiple inositol polyphosphate phosphatase 1	LOC103513143		tr|A0A1S3D7P9|A0A1S3D7P9_DIACI	tr|A0A1S3D7P9|A0A1S3D7P9_DIACI Multiple inositol polyphosphate phosphatase 1 OS=Diaphorina citri OX=121845 GN=LOC103513143 PE=4 SV=1	1	3	3	3	14.7	32.931	144310	162040	141430	149260	29738	268620	107160	135173	1.10422	0.851703
A0A1S3DRH5	Signal recognition particle receptor subunit beta	LOC103523444		tr|A0A1S3DRH5|A0A1S3DRH5_DIACI;tr|A0A1S3D7Q3|A0A1S3D7Q3_DIACI	tr|A0A1S3DRH5|A0A1S3DRH5_DIACI Signal recognition particle receptor subunit beta OS=Diaphorina citri OX=121845 GN=LOC103523444 PE=3 SV=2;tr|A0A1S3D7Q3|A0A1S3D7Q3_DIACI Signal recognition particle receptor subunit beta OS=Diaphorina citri OX=121845 GN=LOC10	2	2	2	2	14.5	24.96	17537	29685	46098	31106.7	40033	40102	44373	41502.7	0.74951	0.28349
A0A1S3D7T0	2-oxoglutarate dehydrogenase-like, mitochondrial isoform X1	LOC103513212		tr|A0A1S3D7T0|A0A1S3D7T0_DIACI	tr|A0A1S3D7T0|A0A1S3D7T0_DIACI 2-oxoglutarate dehydrogenase-like, mitochondrial isoform X1 OS=Diaphorina citri OX=121845 GN=LOC103513212 PE=3 SV=1	1	5	2	2	43.1	18.281	100650	323860	478970	301160	429160	274830	305110	336367	0.895332	0.78298
A0A1S3D7T1	Proteasome subunit beta	LOC103513094		tr|A0A1S3D7T1|A0A1S3D7T1_DIACI	tr|A0A1S3D7T1|A0A1S3D7T1_DIACI Proteasome subunit beta OS=Diaphorina citri OX=121845 GN=LOC103513094 PE=3 SV=1	1	4	4	4	34.6	22.846	431700	229690	261530	307640	171950	243840	236090	217293	1.41578	0.247131
A0A1S3D7T6	UPF0389 protein CG9231	LOC103513213		tr|A0A1S3D7T6|A0A1S3D7T6_DIACI	tr|A0A1S3D7T6|A0A1S3D7T6_DIACI UPF0389 protein CG9231 OS=Diaphorina citri OX=121845 GN=LOC103513213 PE=3 SV=1	1	4	4	4	28.5	17.232	816990	590270	645250	684170	586180	305100	205830	365703	1.87083	0.0745106
A0A1S3D7T8	Kynurenine/alpha-aminoadipate aminotransferase, mitochondrial	LOC103513100		tr|A0A1S3D7T8|A0A1S3D7T8_DIACI	tr|A0A1S3D7T8|A0A1S3D7T8_DIACI Kynurenine/alpha-aminoadipate aminotransferase, mitochondrial OS=Diaphorina citri OX=121845 GN=LOC103513100 PE=4 SV=1	1	4	4	4	13.9	55.443	243090	109500	128050	160213	153780	101670	103880	119777	1.3376	0.420748
A0A1S3D7U8	SURF1-like protein	LOC103513124	FUNCTION: Probably involved in the biogenesis of the COX complex. {ECO:0000256|RuleBase:RU363076}.	tr|A0A1S3D7U8|A0A1S3D7U8_DIACI	tr|A0A1S3D7U8|A0A1S3D7U8_DIACI SURF1-like protein OS=Diaphorina citri OX=121845 GN=LOC103513124 PE=3 SV=1	1	2	2	2	5.8	31.359	84863	63246	53413	67174	45603	51948	47657	48402.7	1.38782	0.118647
A0A1S3D7U9	Succinate-semialdehyde dehydrogenase, mitochondrial-like	LOC103512391		tr|A0A1S3D7U9|A0A1S3D7U9_DIACI	tr|A0A1S3D7U9|A0A1S3D7U9_DIACI Succinate-semialdehyde dehydrogenase, mitochondrial-like OS=Diaphorina citri OX=121845 GN=LOC103512391 PE=4 SV=1	1	1	1	1	13.8	16.081	872670	403820	448580	575023	413410	327210	390700	377107	1.52483	0.261726
A0A1S3D7V4	S-phase kinase-associated protein 1	LOC103512398		tr|A0A1S3D7V4|A0A1S3D7V4_DIACI	tr|A0A1S3D7V4|A0A1S3D7V4_DIACI S-phase kinase-associated protein 1 OS=Diaphorina citri OX=121845 GN=LOC103512398 PE=3 SV=1	1	10	10	10	74.7	18.591	1968800	1352800	1549900	1.62383e+06	1648000	1541800	1179900	1.45657e+06	1.11484	0.507974
A0A1S3D973	Sex-lethal homolog isoform X4	LOC103513155		tr|A0A1S3D973|A0A1S3D973_DIACI;tr|A0A3Q0J6E4|A0A3Q0J6E4_DIACI;tr|A0A1S3D7X3|A0A1S3D7X3_DIACI	tr|A0A1S3D973|A0A1S3D973_DIACI Sex-lethal homolog isoform X4 OS=Diaphorina citri OX=121845 GN=LOC103513155 PE=4 SV=1;tr|A0A3Q0J6E4|A0A3Q0J6E4_DIACI Sex-lethal homolog isoform X3 OS=Diaphorina citri OX=121845 GN=LOC103513155 PE=4 SV=1;tr|A0A1S3D7X3|A0A1S3D7	3	5	5	5	31.8	24.77	392780	336270	330540	353197	424970	484510	320040	409840	0.861792	0.337402
A0A1S3D7X6	Uncharacterized protein LOC103513259	LOC103513259		tr|A0A1S3D7X6|A0A1S3D7X6_DIACI	tr|A0A1S3D7X6|A0A1S3D7X6_DIACI Uncharacterized protein LOC103513259 OS=Diaphorina citri OX=121845 GN=LOC103513259 PE=4 SV=1	1	2	2	2	11.3	30.33	151170	3715.2	72582	75822.4	11131	16953		14042	5.39969	0.343364
A0A1S3D7Z6	Ubiquitin activating enzyme 4	LOC103513305		tr|A0A1S3D7Z6|A0A1S3D7Z6_DIACI	tr|A0A1S3D7Z6|A0A1S3D7Z6_DIACI Ubiquitin activating enzyme 4 OS=Diaphorina citri OX=121845 GN=LOC103513305 PE=4 SV=1	1	2	2	2	6.7	58.406	4067.7	5477	5673	5072.57		31849	14280	23064.5	0.21993	0.0716796
A0A1S3D815	von Willebrand factor A domain-containing protein 8	LOC103513324		tr|A0A1S3D815|A0A1S3D815_DIACI;tr|A0A1S3DPX9|A0A1S3DPX9_DIACI	tr|A0A1S3D815|A0A1S3D815_DIACI von Willebrand factor A domain-containing protein 8 OS=Diaphorina citri OX=121845 GN=LOC103513324 PE=4 SV=2	2	3	3	3	4.8	112.9	1465200	2523700	2339900	2109600	2202800	2707000	2559400	2.48973e+06	0.84732	0.349607
A0A1S3D824	Facilitated trehalose transporter Tret1-like	LOC103512517		tr|A0A1S3D824|A0A1S3D824_DIACI	tr|A0A1S3D824|A0A1S3D824_DIACI Facilitated trehalose transporter Tret1-like OS=Diaphorina citri OX=121845 GN=LOC103512517 PE=4 SV=1	1	2	2	2	5	58.496	107570	86966	151700	115412	114870	111150	2617.4	76212.5	1.51435	0.398058
A0A1S3D847	S-adenosylmethionine synthase	LOC103513245	FUNCTION: Catalyzes the formation of S-adenosylmethionine from methionine and ATP. {ECO:0000256|RuleBase:RU000541}.	tr|A0A1S3D847|A0A1S3D847_DIACI	tr|A0A1S3D847|A0A1S3D847_DIACI S-adenosylmethionine synthase OS=Diaphorina citri OX=121845 GN=LOC103513245 PE=3 SV=1	1	7	7	1	29.3	44.325	750960	357000	543250	550403	449180	392050	340150	393793	1.3977	0.255327
A0A1S3D853	Protein odr-4 homolog	LOC103513401		tr|A0A1S3D853|A0A1S3D853_DIACI	tr|A0A1S3D853|A0A1S3D853_DIACI Protein odr-4 homolog OS=Diaphorina citri OX=121845 GN=LOC103513401 PE=3 SV=1	1	3	3	3	11.2	51.646	54713	102640	72571	76641.3	98608	79644	137850	105367	0.727373	0.263879
A0A1S3D855	Charged multivesicular body protein 7	LOC103513403		tr|A0A1S3D855|A0A1S3D855_DIACI	tr|A0A1S3D855|A0A1S3D855_DIACI Charged multivesicular body protein 7 OS=Diaphorina citri OX=121845 GN=LOC103513403 PE=3 SV=1	1	3	3	3	12.5	49.271	36252	5788600	1415300	2413384	2325100	5195000	2548900	3.35633e+06	0.719054	0.656161
A0A1S3D863	Uncharacterized protein LOC103513290	LOC103513290		tr|A0A1S3D863|A0A1S3D863_DIACI	tr|A0A1S3D863|A0A1S3D863_DIACI Uncharacterized protein LOC103513290 OS=Diaphorina citri OX=121845 GN=LOC103513290 PE=4 SV=1	1	2	2	2	28.7	15.655	1332400	488530	647210	822713	140730	106000	59555	102095	8.05831	0.0502443
A0A1S3D866	NADH dehydrogenase [ubiquinone] iron-sulfur protein 6, mitochondrial-like	LOC103513427		tr|A0A1S3D866|A0A1S3D866_DIACI;tr|A0A1S3D0J9|A0A1S3D0J9_DIACI	tr|A0A1S3D866|A0A1S3D866_DIACI NADH dehydrogenase [ubiquinone] iron-sulfur protein 6, mitochondrial-like OS=Diaphorina citri OX=121845 GN=LOC103513427 PE=4 SV=1;tr|A0A1S3D0J9|A0A1S3D0J9_DIACI NADH dehydrogenase [ubiquinone] iron-sulfur protein 6, mitochond	2	4	4	4	57	13.796	5632700	3844600	4144400	4.54057e+06	3487700	3055500	2310600	2.95127e+06	1.53851	0.0711198
A0A1S3D870	Mitochondrial import inner membrane translocase subunit	LOC103513430		tr|A0A1S3D870|A0A1S3D870_DIACI	tr|A0A1S3D870|A0A1S3D870_DIACI Mitochondrial import inner membrane translocase subunit OS=Diaphorina citri OX=121845 GN=LOC103513430 PE=3 SV=1	1	2	2	2	30.3	11.32		5074.9	19687	12381		74402	19061	46731.5	0.264938	0.352916
A0A1S3DS49	Eukaryotic translation initiation factor 4C	LOC103523757	FUNCTION: Seems to be required for maximal rate of protein biosynthesis. Enhances ribosome dissociation into subunits and stabilizes the binding of the initiator Met-tRNA(I) to 40 S ribosomal subunits. {ECO:0000256|RuleBase:RU004365}.	tr|A0A1S3DS49|A0A1S3DS49_DIACI;tr|A0A1S3D896|A0A1S3D896_DIACI	tr|A0A1S3DS49|A0A1S3DS49_DIACI Eukaryotic translation initiation factor 4C OS=Diaphorina citri OX=121845 GN=LOC103523757 PE=3 SV=1;tr|A0A1S3D896|A0A1S3D896_DIACI Eukaryotic translation initiation factor 4C OS=Diaphorina citri OX=121845 GN=LOC103513464 PE=3	2	2	2	2	16.6	16.717	242740	161570	219920	208077	331430	295450	151370	259417	0.802094	0.441025
A0A1S3D899	Microtubule-associated protein RP/EB family member 1 isoform X3	LOC103513470		tr|A0A1S3D899|A0A1S3D899_DIACI;tr|A0A1S3D9R5|A0A1S3D9R5_DIACI;tr|A0A1S3D8A2|A0A1S3D8A2_DIACI	tr|A0A1S3D899|A0A1S3D899_DIACI Microtubule-associated protein RP/EB family member 1 isoform X3 OS=Diaphorina citri OX=121845 GN=LOC103513470 PE=4 SV=1;tr|A0A1S3D9R5|A0A1S3D9R5_DIACI Microtubule-associated protein RP/EB family member 3 isoform X2 OS=Diaphor	3	4	4	4	24.9	23.964	1471300	959030	1096700	1.17568e+06	872200	821570	828890	840887	1.39814	0.0951972
A0A1S3D8B1	Vitellogenin-1-like	LOC103513496		tr|A0A1S3D8B1|A0A1S3D8B1_DIACI	tr|A0A1S3D8B1|A0A1S3D8B1_DIACI Vitellogenin-1-like OS=Diaphorina citri OX=121845 GN=LOC103513496 PE=4 SV=1	1	6	2	2	55	8.9852	207490	99284	350720	219165	70885	57726		64305.5	3.40818	0.198504
A0A1S3D8C1	Small nuclear ribonucleoprotein Sm D2	LOC103513502		tr|A0A1S3D8C1|A0A1S3D8C1_DIACI	tr|A0A1S3D8C1|A0A1S3D8C1_DIACI Small nuclear ribonucleoprotein Sm D2 OS=Diaphorina citri OX=121845 GN=LOC103513502 PE=3 SV=1	1	1	1	1	19.1	12.658	23902	34729	7107.2	21912.7	261350	22921	3801.7	96024.2	0.2282	0.423576
A0A1S3D8D4	Triokinase/FMN cyclase	LOC103512699		tr|A0A1S3D8D4|A0A1S3D8D4_DIACI	tr|A0A1S3D8D4|A0A1S3D8D4_DIACI Triokinase/FMN cyclase OS=Diaphorina citri OX=121845 GN=LOC103512699 PE=4 SV=2	1	6	6	6	23.6	44.349	262180	410310	363580	345357	194150	246730	307440	249440	1.38453	0.1539
A0A1S3D8D9	Uncharacterized protein LOC103512709	LOC103512709		tr|A0A1S3D8D9|A0A1S3D8D9_DIACI	tr|A0A1S3D8D9|A0A1S3D8D9_DIACI Uncharacterized protein LOC103512709 OS=Diaphorina citri OX=121845 GN=LOC103512709 PE=4 SV=1	1	1	1	1	3.6	32.127	4549.4	8765.9		6657.65	103700		9067.7	56383.8	0.118077	0.403919
A0A1S3D8E8	Eukaryotic translation initiation factor 2 subunit 3-like	LOC103513433		tr|A0A1S3D8E8|A0A1S3D8E8_DIACI	tr|A0A1S3D8E8|A0A1S3D8E8_DIACI Eukaryotic translation initiation factor 2 subunit 3-like OS=Diaphorina citri OX=121845 GN=LOC103513433 PE=4 SV=1	1	4	2	2	33.5	21.961	394400	137960	204260	245540	180040	151720	315690	215817	1.13772	0.762854
A0A1S3D8F5	Carboxylic ester hydrolase	LOC103513553		tr|A0A1S3D8F5|A0A1S3D8F5_DIACI;tr|A0A3Q0JIX9|A0A3Q0JIX9_DIACI	tr|A0A1S3D8F5|A0A1S3D8F5_DIACI Carboxylic ester hydrolase OS=Diaphorina citri OX=121845 GN=LOC103513553 PE=3 SV=1	2	15	15	10	27.7	72.634	2762500	4196600	4404200	3.78777e+06	2991400	5685300	6516800	5064500	0.747905	0.341056
A0A1S3D8G0	Troponin I-like	LOC103513560		tr|A0A1S3D8G0|A0A1S3D8G0_DIACI;tr|Q0PXW0|Q0PXW0_DIACI	tr|A0A1S3D8G0|A0A1S3D8G0_DIACI Troponin I-like OS=Diaphorina citri OX=121845 GN=LOC103513560 PE=4 SV=1;tr|Q0PXW0|Q0PXW0_DIACI Putative troponin I OS=Diaphorina citri OX=121845 GN=LOC103522353 PE=2 SV=1	2	11	9	9	43.4	17.052	19507000	13509000	14088000	1.57013e+07	14386000	13223000	12830000	1.34797e+07	1.16482	0.321727
A0A1S3D8G3	Uncharacterized protein LOC103513455	LOC103513455		tr|A0A1S3D8G3|A0A1S3D8G3_DIACI	tr|A0A1S3D8G3|A0A1S3D8G3_DIACI Uncharacterized protein LOC103513455 OS=Diaphorina citri OX=121845 GN=LOC103513455 PE=4 SV=1	1	2	2	2	9.6	13.541	1054100	2197900	3369700	2.20723e+06	593530	1009800	2365400	1322910	1.66847	0.360004
A0A1S3D8G9	Small ribosomal subunit protein eS28	LOC103513573		tr|A0A1S3D8G9|A0A1S3D8G9_DIACI	tr|A0A1S3D8G9|A0A1S3D8G9_DIACI Small ribosomal subunit protein eS28 OS=Diaphorina citri OX=121845 GN=LOC103513573 PE=3 SV=1	1	2	2	2	32.3	7.3775	2716800	1756300	2021000	2164700	2428400	1837100	1317900	1.86113e+06	1.16311	0.519213
A0A1S3D8H4	Uncharacterized protein LOC103513571	LOC103513571		tr|A0A1S3D8H4|A0A1S3D8H4_DIACI	tr|A0A1S3D8H4|A0A1S3D8H4_DIACI Uncharacterized protein LOC103513571 OS=Diaphorina citri OX=121845 GN=LOC103513571 PE=4 SV=1	1	2	2	2	10.3	23.409	664110	594900	540430	599813	870350	685000	569910	708420	0.846692	0.314716
A0A1S3D8H7	Uncharacterized protein LOC103513466	LOC103513466		tr|A0A1S3D8H7|A0A1S3D8H7_DIACI	tr|A0A1S3D8H7|A0A1S3D8H7_DIACI Uncharacterized protein LOC103513466 OS=Diaphorina citri OX=121845 GN=LOC103513466 PE=4 SV=1	1	1	1	1	0.8	142	1021500	1488800	1562000	1.35743e+06	538160	1156800	1166600	953853	1.4231	0.206668
A0A1S3D8I5	Alpha-soluble NSF attachment protein-like	LOC103513582	FUNCTION: Required for vesicular transport between the endoplasmic reticulum and the Golgi apparatus. {ECO:0000256|RuleBase:RU367013}.	tr|A0A1S3D8I5|A0A1S3D8I5_DIACI	tr|A0A1S3D8I5|A0A1S3D8I5_DIACI Alpha-soluble NSF attachment protein-like OS=Diaphorina citri OX=121845 GN=LOC103513582 PE=3 SV=2	1	2	2	2	12.4	21.498	7601.1	87206	75107	56638	141430	2498.2	101540	81822.7	0.692204	0.628622
A0A1S3D8L3	Proteasome subunit alpha type-4-like	LOC103513627		tr|A0A1S3D8L3|A0A1S3D8L3_DIACI;tr|A0A1S3DE06|A0A1S3DE06_DIACI	tr|A0A1S3D8L3|A0A1S3D8L3_DIACI Proteasome subunit alpha type-4-like OS=Diaphorina citri OX=121845 GN=LOC103513627 PE=4 SV=1;tr|A0A1S3DE06|A0A1S3DE06_DIACI Proteasome subunit alpha type-4-like OS=Diaphorina citri OX=121845 GN=LOC103516856 PE=4 SV=1	2	2	2	2	40	6.6464	461950	223320	233990	306420	216440	174700	181190	190777	1.60617	0.216601
A0A1S4EGR0	Endothelial differentiation-related factor 1 homolog	LOC103513644		tr|A0A1S4EGR0|A0A1S4EGR0_DIACI;tr|A0A1S3D8M3|A0A1S3D8M3_DIACI	tr|A0A1S4EGR0|A0A1S4EGR0_DIACI Endothelial differentiation-related factor 1 homolog OS=Diaphorina citri OX=121845 GN=LOC103513644 PE=4 SV=1;tr|A0A1S3D8M3|A0A1S3D8M3_DIACI Endothelial differentiation-related factor 1 homolog OS=Diaphorina citri OX=121845 GN	2	1	1	1	11.6	14.294	147920	82969	102950	111280	125820	112350	75445	104538	1.06449	0.796061
A0A1S3D8M9	Uncharacterized protein LOC103513652	LOC103513652		tr|A0A1S3D8M9|A0A1S3D8M9_DIACI	tr|A0A1S3D8M9|A0A1S3D8M9_DIACI Uncharacterized protein LOC103513652 OS=Diaphorina citri OX=121845 GN=LOC103513652 PE=4 SV=1	1	2	1	1	11.1	32.963	36559		7021.7	21790.3	212760	14408	12503	79890.3	0.272753	0.549772
A0A1S3D8N7	Dual specificity protein phosphatase	LOC103512884	FUNCTION: Dual specificity phosphatase able to dephosphorylate phosphotyrosine, phosphoserine and phosphothreonine residues, with a preference for phosphotyrosine as a substrate. {ECO:0000256|RuleBase:RU366038}.	tr|A0A1S3D8N7|A0A1S3D8N7_DIACI	tr|A0A1S3D8N7|A0A1S3D8N7_DIACI Dual specificity protein phosphatase OS=Diaphorina citri OX=121845 GN=LOC103512884 PE=3 SV=1	1	5	5	5	50.3	16.297	224300	101800	71911	132670	109870	93784	112420	105358	1.25923	0.592212
A0A1S3D8P5	Polypeptide N-acetylgalactosaminyltransferase 9	LOC103513664		tr|A0A1S3D8P5|A0A1S3D8P5_DIACI	tr|A0A1S3D8P5|A0A1S3D8P5_DIACI Polypeptide N-acetylgalactosaminyltransferase 9 OS=Diaphorina citri OX=121845 GN=LOC103513664 PE=4 SV=2	1	1	1	1	6.9	26.74	71081		49451	60266	40153	33786		36969.5	1.63015	0.174757
A0A1S3D8Q2	RPB5 homolog	LOC103513569		tr|A0A1S3D8Q2|A0A1S3D8Q2_DIACI	tr|A0A1S3D8Q2|A0A1S3D8Q2_DIACI RPB5 homolog OS=Diaphorina citri OX=121845 GN=LOC103513569 PE=3 SV=1	1	1	1	1	7.2	27.277	33935	33640	40668	36081	42084	38354	31127	37188.3	0.970224	0.793179
A0A3Q0J5T3	Glucose dehydrogenase [FAD, quinone] isoform X1	LOC103512943		tr|A0A3Q0J5T3|A0A3Q0J5T3_DIACI;tr|A0A1S3D8R6|A0A1S3D8R6_DIACI	tr|A0A3Q0J5T3|A0A3Q0J5T3_DIACI Glucose dehydrogenase [FAD, quinone] isoform X1 OS=Diaphorina citri OX=121845 GN=LOC103512943 PE=3 SV=1;tr|A0A1S3D8R6|A0A1S3D8R6_DIACI Glucose dehydrogenase [FAD, quinone] isoform X2 OS=Diaphorina citri OX=121845 GN=LOC103512	2	2	2	2	4.7	56.946	17302	38247	39785	31778	34005	69102	49431	50846	0.624985	0.201244
A0A1S3D8R7	DnaJ homolog subfamily A member 1 isoform X1	LOC103513585		tr|A0A1S3D8R7|A0A1S3D8R7_DIACI;tr|A0A1S4EGN3|A0A1S4EGN3_DIACI;tr|A0A3Q0JF56|A0A3Q0JF56_DIACI	tr|A0A1S3D8R7|A0A1S3D8R7_DIACI DnaJ homolog subfamily A member 1 isoform X1 OS=Diaphorina citri OX=121845 GN=LOC103513585 PE=3 SV=1;tr|A0A1S4EGN3|A0A1S4EGN3_DIACI DnaJ homolog subfamily A member 1 isoform X3 OS=Diaphorina citri OX=121845 GN=LOC103513585 PE	3	14	14	13	49.8	44.618	754930	750330	667090	724117	719640	655690	573390	649573	1.11476	0.21805
A0A1S3D8S4	Calmodulin-A-like	LOC103513726	FUNCTION: May be involved in calcium-mediated signal transduction. {ECO:0000256|RuleBase:RU367017}.	tr|A0A1S3D8S4|A0A1S3D8S4_DIACI	tr|A0A1S3D8S4|A0A1S3D8S4_DIACI Calmodulin-A-like OS=Diaphorina citri OX=121845 GN=LOC103513726 PE=4 SV=1	1	3	2	2	22.1	16.861		2313.2	6178.7	4245.95	53197	7893.8	13848	24979.6	0.169977	0.341928
A0A1S3D8S7	Protein anoxia up-regulated	LOC103513598		tr|A0A1S3D8S7|A0A1S3D8S7_DIACI	tr|A0A1S3D8S7|A0A1S3D8S7_DIACI Protein anoxia up-regulated OS=Diaphorina citri OX=121845 GN=LOC103513598 PE=4 SV=1	1	5	5	5	44.7	12.442	4442800	4586800	4170800	4.40013e+06	6041800	4056700	3995600	4.69803e+06	0.93659	0.685265
A0A1S3D8T0	Cytochrome c oxidase subunit 6B	LOC103513747		tr|A0A1S3D8T0|A0A1S3D8T0_DIACI	tr|A0A1S3D8T0|A0A1S3D8T0_DIACI Cytochrome c oxidase subunit 6B OS=Diaphorina citri OX=121845 GN=LOC103513747 PE=4 SV=1	1	3	3	3	36.8	12.423	221070	29368	43463	97967	32752	67243	28457	42817.3	2.28802	0.430075
A0A1S3D8U2	Alpha-N-acetylglucosaminidase-like	LOC103513622		tr|A0A1S3D8U2|A0A1S3D8U2_DIACI	tr|A0A1S3D8U2|A0A1S3D8U2_DIACI Alpha-N-acetylglucosaminidase-like OS=Diaphorina citri OX=121845 GN=LOC103513622 PE=4 SV=1	1	2	1	1	33	9.9391	113720	69842	73196	85586	68494	72315	74417	71742	1.19297	0.384995
A0A1S3D8V0	Glutaredoxin-3-like	LOC103513771		tr|A0A1S3D8V0|A0A1S3D8V0_DIACI	tr|A0A1S3D8V0|A0A1S3D8V0_DIACI Glutaredoxin-3-like OS=Diaphorina citri OX=121845 GN=LOC103513771 PE=4 SV=1	1	3	3	3	31.1	15.386	787940	541850	506820	612203	714500	590090	539680	614757	0.995847	0.981334
A0A1S3D8W4	Geranylgeranyl transferase type-2 subunit alpha	LOC103513795		tr|A0A1S3D8W4|A0A1S3D8W4_DIACI;tr|A0A3Q0J7M8|A0A3Q0J7M8_DIACI	tr|A0A1S3D8W4|A0A1S3D8W4_DIACI Geranylgeranyl transferase type-2 subunit alpha OS=Diaphorina citri OX=121845 GN=LOC103513795 PE=3 SV=1;tr|A0A3Q0J7M8|A0A3Q0J7M8_DIACI Geranylgeranyl transferase type-2 subunit alpha OS=Diaphorina citri OX=121845 GN=LOC103513	2	3	3	3	10.1	61.901	50988	51447	46570	49668.3	38476	72557	80633	63888.7	0.77742	0.335848
A0A1S3D8X3	LOW QUALITY PROTEIN: endoplasmic reticulum chaperone BiP-like	LOC103513817		tr|A0A1S3D8X3|A0A1S3D8X3_DIACI;tr|A0A3Q0J2J1|A0A3Q0J2J1_DIACI	tr|A0A1S3D8X3|A0A1S3D8X3_DIACI LOW QUALITY PROTEIN: endoplasmic reticulum chaperone BiP-like OS=Diaphorina citri OX=121845 GN=LOC103513817 PE=3 SV=2	2	30	30	27	48.9	72.608	20761000	16052000	17470000	1.80943e+07	23401000	17377000	16922000	1.92333e+07	0.94078	0.673629
A0A1S3D8Y2	26S proteasome non-ATPase regulatory subunit 13	LOC103513835		tr|A0A1S3D8Y2|A0A1S3D8Y2_DIACI	tr|A0A1S3D8Y2|A0A1S3D8Y2_DIACI 26S proteasome non-ATPase regulatory subunit 13 OS=Diaphorina citri OX=121845 GN=LOC103513835 PE=4 SV=1	1	10	10	10	36.1	44.064	393000	439630	567660	466763	311010	465570	378980	385187	1.21178	0.301057
A0A3Q0J756	Uncharacterized protein LOC103513879 isoform X3	LOC103513879		tr|A0A3Q0J756|A0A3Q0J756_DIACI;tr|A0A1S3D911|A0A1S3D911_DIACI	tr|A0A3Q0J756|A0A3Q0J756_DIACI Uncharacterized protein LOC103513879 isoform X3 OS=Diaphorina citri OX=121845 GN=LOC103513879 PE=4 SV=1;tr|A0A1S3D911|A0A1S3D911_DIACI Uncharacterized protein LOC103513879 isoform X1 OS=Diaphorina citri OX=121845 GN=LOC103513	2	3	3	3	17.6	28.024	100200	184650	320590	201813	180760	182230	361200	241397	0.836024	0.675483
A0A1S3D915	Uncharacterized protein LOC103513887	LOC103513887		tr|A0A1S3D915|A0A1S3D915_DIACI;tr|A0A3Q0J766|A0A3Q0J766_DIACI	tr|A0A1S3D915|A0A1S3D915_DIACI Uncharacterized protein LOC103513887 OS=Diaphorina citri OX=121845 GN=LOC103513887 PE=4 SV=1	2	9	9	9	62.5	27.401	1186500	1005100	987750	1.05978e+06	949530	1110400	1129800	1.06324e+06	0.996746	0.969645
A0A1S3D923	Neurexin-4-like	LOC103513882		tr|A0A1S3D923|A0A1S3D923_DIACI	tr|A0A1S3D923|A0A1S3D923_DIACI Neurexin-4-like OS=Diaphorina citri OX=121845 GN=LOC103513882 PE=3 SV=2	1	6	1	1	20.1	42.801	3088.6	67354	43007	37816.5		55209	71139	63174	0.598609	0.383501
A0A1S3D925	X-ray repair cross-complementing protein 5-like	LOC103513911		tr|A0A1S3D925|A0A1S3D925_DIACI	tr|A0A1S3D925|A0A1S3D925_DIACI X-ray repair cross-complementing protein 5-like OS=Diaphorina citri OX=121845 GN=LOC103513911 PE=4 SV=1	1	2	2	2	6.3	60.61	173290	71146	116620	120352	45910	31891	63548	47116.3	2.55436	0.0770213
A0A1S3D948	Heat shock protein 70 A1-like isoform X2	LOC103513939		tr|A0A1S3D948|A0A1S3D948_DIACI;tr|A0A1S3DAN2|A0A1S3DAN2_DIACI;tr|A0A1S3D964|A0A1S3D964_DIACI;tr|A0A3Q0IVR3|A0A3Q0IVR3_DIACI;tr|A0A1S3DAP3|A0A1S3DAP3_DIACI;tr|A0A1S3D3Y1|A0A1S3D3Y1_DIACI;tr|A0A1S3D970|A0A1S3D970_DIACI;tr|C5NS96|C5NS96_DIACI;tr|A0A1S3DT18|A0A1S3DT18_DIACI	tr|A0A1S3D948|A0A1S3D948_DIACI Heat shock protein 70 A1-like isoform X2 OS=Diaphorina citri OX=121845 GN=LOC103513939 PE=3 SV=1;tr|A0A1S3DAN2|A0A1S3DAN2_DIACI Heat shock protein 70 A1-like OS=Diaphorina citri OX=121845 GN=LOC103513939 PE=3 SV=1;tr|A0A1S3D9	9	13	10	10	25.4	68.977	1018400	875390	800460	898083	2012000	1417200	1221300	1.55017e+06	0.579346	0.0570566
A0A1S3D965	NADP-dependent malic enzyme-like	LOC103513943		tr|A0A1S3D965|A0A1S3D965_DIACI	tr|A0A1S3D965|A0A1S3D965_DIACI NADP-dependent malic enzyme-like OS=Diaphorina citri OX=121845 GN=LOC103513943 PE=4 SV=2	1	4	4	4	27.7	15.712	1623800	2287400	2396800	2.10267e+06	1736600	916350	1378600	1343850	1.56466	0.0885629
A0A1S3D966	Uncharacterized protein LOC103513825 isoform X1	LOC103513825		tr|A0A1S3D966|A0A1S3D966_DIACI	tr|A0A1S3D966|A0A1S3D966_DIACI Uncharacterized protein LOC103513825 isoform X1 OS=Diaphorina citri OX=121845 GN=LOC103513825 PE=4 SV=1	1	3	3	3	45	11.044	758620	619700	578990	652437	1028500	720160	617190	788617	0.827318	0.370181
A0A1S3D977	Protein quiver	LOC103513974		tr|A0A1S3D977|A0A1S3D977_DIACI	tr|A0A1S3D977|A0A1S3D977_DIACI Protein quiver OS=Diaphorina citri OX=121845 GN=LOC103513974 PE=3 SV=1	1	1	1	1	8.8	17.933		23276	24933	24104.5	18111	26002	36988	27033.7	0.891647	0.707389
A0A1S3D983	LOW QUALITY PROTEIN: protein kinase C and casein kinase substrate in neurons protein 1-like	LOC103513191		tr|A0A1S3D983|A0A1S3D983_DIACI	tr|A0A1S3D983|A0A1S3D983_DIACI LOW QUALITY PROTEIN: protein kinase C and casein kinase substrate in neurons protein 1-like OS=Diaphorina citri OX=121845 GN=LOC103513191 PE=4 SV=2	1	3	2	2	11	36.662		186620	209950	198285	283370	279770	169070	244070	0.81241	0.420753
A0A1S3D990	Apyrase	LOC103513970		tr|A0A1S3D990|A0A1S3D990_DIACI;tr|A0A3Q0JMK1|A0A3Q0JMK1_DIACI	tr|A0A1S3D990|A0A1S3D990_DIACI Apyrase OS=Diaphorina citri OX=121845 GN=LOC103513970 PE=3 SV=2	2	8	8	8	25.2	47.644	307880	227920	231020	255607	335650	298120	386310	340027	0.751725	0.0821311
A0A1S3D9A6	Guanine nucleotide-binding protein subunit beta-2 isoform X1	LOC103513214		tr|A0A1S3D9A6|A0A1S3D9A6_DIACI	tr|A0A1S3D9A6|A0A1S3D9A6_DIACI Guanine nucleotide-binding protein subunit beta-2 isoform X1 OS=Diaphorina citri OX=121845 GN=LOC103513214 PE=3 SV=1	1	8	8	8	29.3	38.257	107680	38408	175350	107146	199700	252980	476580	309753	0.345907	0.0963398
A0A1S3D9B1	Ethanolamine kinase	LOC103513219		tr|A0A1S3D9B1|A0A1S3D9B1_DIACI	tr|A0A1S3D9B1|A0A1S3D9B1_DIACI Ethanolamine kinase OS=Diaphorina citri OX=121845 GN=LOC103513219 PE=4 SV=1	1	2	2	2	21.6	13.511	15957	73517	81303	56925.7	107040	52541	106580	88720.3	0.64163	0.310751
A0A1S3D9C2	NADH dehydrogenase [ubiquinone] 1 beta subcomplex subunit 4	LOC103514037		tr|A0A1S3D9C2|A0A1S3D9C2_DIACI	tr|A0A1S3D9C2|A0A1S3D9C2_DIACI NADH dehydrogenase [ubiquinone] 1 beta subcomplex subunit 4 OS=Diaphorina citri OX=121845 GN=LOC103514037 PE=3 SV=1	1	3	3	3	40	13.595	869510	900820	1028400	932910	364550	1193300	785770	781207	1.19419	0.568003
A0A1S3D9D8	phosphoribosylaminoimidazolesuccinocarboxamide synthase	LOC103514080		tr|A0A1S3D9D8|A0A1S3D9D8_DIACI	tr|A0A1S3D9D8|A0A1S3D9D8_DIACI phosphoribosylaminoimidazolesuccinocarboxamide synthase OS=Diaphorina citri OX=121845 GN=LOC103514080 PE=4 SV=1	1	6	6	6	47	23.086	451920	483770	510610	482100	417200	606320	441670	488397	0.987107	0.923698
A0A1S3D9E0	Mitochondrial uncoupling protein 4 isoform X1	LOC103513274		tr|A0A1S3D9E0|A0A1S3D9E0_DIACI;tr|A0A1S4EGC0|A0A1S4EGC0_DIACI;tr|A0A1S3DSZ7|A0A1S3DSZ7_DIACI	tr|A0A1S3D9E0|A0A1S3D9E0_DIACI Mitochondrial uncoupling protein 4 isoform X1 OS=Diaphorina citri OX=121845 GN=LOC103513274 PE=3 SV=1;tr|A0A1S4EGC0|A0A1S4EGC0_DIACI Mitochondrial uncoupling protein 4 isoform X2 OS=Diaphorina citri OX=121845 GN=LOC103513274	3	3	3	3	14.6	35.21	125600	61528	187570	124899		14732	36443	25587.5	4.88126	0.128578
A0A1S3D9F2	Protein yellow-like	LOC103513958		tr|A0A1S3D9F2|A0A1S3D9F2_DIACI;tr|A0A3Q0JEP4|A0A3Q0JEP4_DIACI	tr|A0A1S3D9F2|A0A1S3D9F2_DIACI Protein yellow-like OS=Diaphorina citri OX=121845 GN=LOC103513958 PE=3 SV=1	2	8	8	6	20.4	49.593	254500	403510	309150	322387	426300	361310	416150	401253	0.803449	0.175538
A0A1S3D9H1	Small ribosomal subunit protein mS40	LOC103514120		tr|A0A1S3D9H1|A0A1S3D9H1_DIACI	tr|A0A1S3D9H1|A0A1S3D9H1_DIACI Small ribosomal subunit protein mS40 OS=Diaphorina citri OX=121845 GN=LOC103514120 PE=3 SV=1	1	2	2	2	11.2	24.859	52921	32070	118670	67887	48450	46893	57608	50983.7	1.33154	0.555519
A0A1S3D9H2	alpha-L-fucosidase	LOC103514140		tr|A0A1S3D9H2|A0A1S3D9H2_DIACI;tr|A0A1S3DQJ7|A0A1S3DQJ7_DIACI	tr|A0A1S3D9H2|A0A1S3D9H2_DIACI alpha-L-fucosidase OS=Diaphorina citri OX=121845 GN=LOC103514140 PE=3 SV=1	2	18	18	18	46.2	53.753	3882500	3043000	3192500	3.37267e+06	2555600	2977000	2766700	2.76643e+06	1.21914	0.101151
A0A1S3D9I6	Skin secretory protein xP2-like isoform X1	LOC103514141		tr|A0A1S3D9I6|A0A1S3D9I6_DIACI	tr|A0A1S3D9I6|A0A1S3D9I6_DIACI Skin secretory protein xP2-like isoform X1 OS=Diaphorina citri OX=121845 GN=LOC103514141 PE=4 SV=1	1	14	14	12	31.2	50.564	26004000	19007000	18077000	2.10293e+07	22677000	15830000	15389000	1.79653e+07	1.17055	0.423271
A0A1S3D9J3	Syntaxin-1A-like	LOC103514014		tr|A0A1S3D9J3|A0A1S3D9J3_DIACI	tr|A0A1S3D9J3|A0A1S3D9J3_DIACI Syntaxin-1A-like OS=Diaphorina citri OX=121845 GN=LOC103514014 PE=3 SV=1	1	6	6	6	30.7	30.313	1290300	786940	849650	975630	752120	811250	781220	781530	1.24836	0.289974
A0A1S3D9N5	Peroxiredoxin-6-like isoform X1	LOC103513426		tr|A0A1S3D9N5|A0A1S3D9N5_DIACI	tr|A0A1S3D9N5|A0A1S3D9N5_DIACI Peroxiredoxin-6-like isoform X1 OS=Diaphorina citri OX=121845 GN=LOC103513426 PE=4 SV=1	1	2	2	2	57.8	9.4807	332640	100590	86956	173395	89403	73447		81425	2.12951	0.438045
A0A1S3D9P8	Lipase maturation factor	LOC103513404	FUNCTION: Involved in the maturation of specific proteins in the endoplasmic reticulum. {ECO:0000256|RuleBase:RU361229}.	tr|A0A1S3D9P8|A0A1S3D9P8_DIACI	tr|A0A1S3D9P8|A0A1S3D9P8_DIACI Lipase maturation factor OS=Diaphorina citri OX=121845 GN=LOC103513404 PE=3 SV=1	1	7	7	7	17.4	76.515	599660	444060	438690	494137	290880	407950	320540	339790	1.45424	0.0716655
A0A1S3D9Q2	Uncharacterized protein LOC103514307	LOC103514307		tr|A0A1S3D9Q2|A0A1S3D9Q2_DIACI;tr|A0A1S3D9T8|A0A1S3D9T8_DIACI	tr|A0A1S3D9Q2|A0A1S3D9Q2_DIACI Uncharacterized protein LOC103514307 OS=Diaphorina citri OX=121845 GN=LOC103514307 PE=4 SV=1;tr|A0A1S3D9T8|A0A1S3D9T8_DIACI Uncharacterized protein LOC103514304 OS=Diaphorina citri OX=121845 GN=LOC103514304 PE=4 SV=1	2	2	2	2	17.2	19.291		32342	56453	44397.5	20283	37397	24069	27249.7	1.62929	0.223537
A0A1S3DB52	Heterogeneous nuclear ribonucleoprotein M isoform X2	LOC103514237		tr|A0A1S3DB52|A0A1S3DB52_DIACI;tr|A0A1S3D9Q4|A0A1S3D9Q4_DIACI	tr|A0A1S3DB52|A0A1S3DB52_DIACI Heterogeneous nuclear ribonucleoprotein M isoform X2 OS=Diaphorina citri OX=121845 GN=LOC103514237 PE=4 SV=1;tr|A0A1S3D9Q4|A0A1S3D9Q4_DIACI Heterogeneous nuclear ribonucleoprotein M isoform X1 OS=Diaphorina citri OX=121845 GN	2	4	4	4	15.6	46.595	277230	260030	267070	268110	367570	375410	286440	343140	0.781343	0.060147
A0A1S3D9Q7	Serine/threonine-protein phosphatase	LOC103513459		tr|A0A1S3D9Q7|A0A1S3D9Q7_DIACI	tr|A0A1S3D9Q7|A0A1S3D9Q7_DIACI Serine/threonine-protein phosphatase OS=Diaphorina citri OX=121845 GN=LOC103513459 PE=3 SV=1	1	10	5	5	33.3	37.182	282800	225680	117420	208633	176140	347150	224490	249260	0.837011	0.594309
A0A1S3D9R4	Angiotensin-converting enzyme	LOC103514272		tr|A0A1S3D9R4|A0A1S3D9R4_DIACI	tr|A0A1S3D9R4|A0A1S3D9R4_DIACI Angiotensin-converting enzyme OS=Diaphorina citri OX=121845 GN=LOC103514272 PE=3 SV=1	1	2	2	2	5	66.438	763110	889170	467850	706710	1180500	649680	430870	753683	0.937675	0.862911
A0A3Q0J3S6	Serine/threonine-protein kinase 26 isoform X2	LOC103514289		tr|A0A3Q0J3S6|A0A3Q0J3S6_DIACI;tr|A0A1S3D9S4|A0A1S3D9S4_DIACI	tr|A0A3Q0J3S6|A0A3Q0J3S6_DIACI Serine/threonine-protein kinase 26 isoform X2 OS=Diaphorina citri OX=121845 GN=LOC103514289 PE=4 SV=1;tr|A0A1S3D9S4|A0A1S3D9S4_DIACI Serine/threonine-protein kinase 26 isoform X1 OS=Diaphorina citri OX=121845 GN=LOC103514289	2	2	2	2	4.7	66.474	5976.2	8793.9	10004	8258.03	14011	27289	11894	17731.3	0.465731	0.128944
A0A1S3D9S7	Ragulator complex protein LAMTOR1	LOC103513491		tr|A0A1S3D9S7|A0A1S3D9S7_DIACI;tr|A0A1S4EGK3|A0A1S4EGK3_DIACI;tr|A0A1S3D8A8|A0A1S3D8A8_DIACI	tr|A0A1S3D9S7|A0A1S3D9S7_DIACI Ragulator complex protein LAMTOR1 OS=Diaphorina citri OX=121845 GN=LOC103513491 PE=3 SV=1;tr|A0A1S4EGK3|A0A1S4EGK3_DIACI Uncharacterized protein LOC103513491 isoform X2 OS=Diaphorina citri OX=121845 GN=LOC103513491 PE=4 SV=1	3	3	3	3	39	18.494	102520	60913	62711	75381.3	65985	64564	94710	75086.3	1.00393	0.986798
A0A1S3D9T3	Programmed cell death protein 6-like isoform X1	LOC103513497		tr|A0A1S3D9T3|A0A1S3D9T3_DIACI	tr|A0A1S3D9T3|A0A1S3D9T3_DIACI Programmed cell death protein 6-like isoform X1 OS=Diaphorina citri OX=121845 GN=LOC103513497 PE=4 SV=1	1	6	5	5	46.8	19.888	95493	334760	359790	263348	298220	309750	334030	314000	0.838687	0.582877
A0A1S3D9T6	Titin-like	LOC103514196		tr|A0A1S3D9T6|A0A1S3D9T6_DIACI	tr|A0A1S3D9T6|A0A1S3D9T6_DIACI Titin-like OS=Diaphorina citri OX=121845 GN=LOC103514196 PE=3 SV=1	1	7	3	3	23.2	154.17	173410	125970	16044	105141	251250	225500	115510	197420	0.532577	0.213794
A0A1S3D9T9	Heat shock protein 83	LOC103514323		tr|A0A1S3D9T9|A0A1S3D9T9_DIACI	tr|A0A1S3D9T9|A0A1S3D9T9_DIACI Heat shock protein 83 OS=Diaphorina citri OX=121845 GN=LOC103514323 PE=3 SV=1	1	32	32	32	62.6	74.319	5610800	2945500	4436900	4.33107e+06	5968600	5036800	4795600	5267000	0.822302	0.332716
A0A1S3D9U8	Sorting nexin-12	LOC103514182		tr|A0A1S3D9U8|A0A1S3D9U8_DIACI	tr|A0A1S3D9U8|A0A1S3D9U8_DIACI Sorting nexin-12 OS=Diaphorina citri OX=121845 GN=LOC103514182 PE=4 SV=1	1	4	4	4	31.9	19.077	304020	156230	191770	217340	373130	186850	177130	245703	0.884563	0.73385
A0A1S3D9V4	Metaxin-1	LOC103514345		tr|A0A1S3D9V4|A0A1S3D9V4_DIACI	tr|A0A1S3D9V4|A0A1S3D9V4_DIACI Metaxin-1 OS=Diaphorina citri OX=121845 GN=LOC103514345 PE=4 SV=2	1	2	2	2	17.5	22.42	83455	49797	62258	65170	27994	39650	42794	36812.7	1.77031	0.0585544
A0A1S3D9Y7	G protein-coupled receptor kinase	LOC103514397		tr|A0A1S3D9Y7|A0A1S3D9Y7_DIACI	tr|A0A1S3D9Y7|A0A1S3D9Y7_DIACI G protein-coupled receptor kinase OS=Diaphorina citri OX=121845 GN=LOC103514397 PE=3 SV=1	1	2	2	2	15.1	30.255	76752	49311	49633	58565.3	62033	62762	48785	57860	1.01219	0.948012
A0A1S3DA04	LOW QUALITY PROTEIN: uncharacterized protein LOC103513589	LOC103513589		tr|A0A1S3DA04|A0A1S3DA04_DIACI	tr|A0A1S3DA04|A0A1S3DA04_DIACI LOW QUALITY PROTEIN: uncharacterized protein LOC103513589 OS=Diaphorina citri OX=121845 GN=LOC103513589 PE=3 SV=1	1	8	8	4	20.2	45.142	1008700	828670	879290	905553	842250	805600	929140	858997	1.0542	0.512968
A0A1S3DA17	Small ribosomal subunit protein mS31	LOC103514443		tr|A0A1S3DA17|A0A1S3DA17_DIACI	tr|A0A1S3DA17|A0A1S3DA17_DIACI Small ribosomal subunit protein mS31 OS=Diaphorina citri OX=121845 GN=LOC103514443 PE=3 SV=1	1	2	2	2	14.8	26.777	19540	29054	30971	26521.7	28474	38059	22947	29826.7	0.889193	0.590309
A0A1S3DA26	Keratin-associated protein 5-3-like	LOC103514453		tr|A0A1S3DA26|A0A1S3DA26_DIACI	tr|A0A1S3DA26|A0A1S3DA26_DIACI Keratin-associated protein 5-3-like OS=Diaphorina citri OX=121845 GN=LOC103514453 PE=4 SV=1	1	8	8	8	84.4	17.941	881380	1648700	1536100	1.35539e+06	2373800	2209300	3626700	2736600	0.495284	0.0528991
A0A1S3DA33	Isocitrate dehydrogenase [NAD] subunit, mitochondrial	LOC103514456		tr|A0A1S3DA33|A0A1S3DA33_DIACI	tr|A0A1S3DA33|A0A1S3DA33_DIACI Isocitrate dehydrogenase [NAD] subunit, mitochondrial OS=Diaphorina citri OX=121845 GN=LOC103514456 PE=3 SV=1	1	10	10	9	41.7	42.15	3904300	6074500	5596000	5191600	2664600	4405900	4660600	3.91037e+06	1.32765	0.231597
A0A1S3DA59	Uncharacterized abhydrolase domain-containing protein DDB_G0269086-like isoform X3	LOC103514494		tr|A0A1S3DA59|A0A1S3DA59_DIACI;tr|A0A1S3DA52|A0A1S3DA52_DIACI;tr|A0A1S4EHR3|A0A1S4EHR3_DIACI	tr|A0A1S3DA59|A0A1S3DA59_DIACI Uncharacterized abhydrolase domain-containing protein DDB_G0269086-like isoform X3 OS=Diaphorina citri OX=121845 GN=LOC103514494 PE=4 SV=1;tr|A0A1S3DA52|A0A1S3DA52_DIACI Uncharacterized abhydrolase domain-containing protein D	3	6	6	6	19.3	47.855	1008200	1460800	1283500	1.25083e+06	1842400	1582200	1426800	1.61713e+06	0.773488	0.110124
A0A1S3DA70	non-specific serine/threonine protein kinase	LOC103514570		tr|A0A1S3DA70|A0A1S3DA70_DIACI;tr|A0A3Q0J4F5|A0A3Q0J4F5_DIACI	tr|A0A1S3DA70|A0A1S3DA70_DIACI non-specific serine/threonine protein kinase OS=Diaphorina citri OX=121845 GN=LOC103514570 PE=3 SV=1;tr|A0A3Q0J4F5|A0A3Q0J4F5_DIACI non-specific serine/threonine protein kinase OS=Diaphorina citri OX=121845 GN=LOC103514574 PE	2	4	4	4	11	57.413		88252	36376	62314	52908	84300	100750	79319.3	0.785609	0.56666
A0A3Q0JKN1	Ran GTPase-activating protein 1-like	LOC113473546		tr|A0A3Q0JKN1|A0A3Q0JKN1_DIACI;tr|A0A3Q0J7C6|A0A3Q0J7C6_DIACI;tr|A0A1S3DA71|A0A1S3DA71_DIACI;tr|A0A3Q0JPZ4|A0A3Q0JPZ4_DIACI	tr|A0A3Q0JKN1|A0A3Q0JKN1_DIACI Ran GTPase-activating protein 1-like OS=Diaphorina citri OX=121845 GN=LOC113473546 PE=4 SV=1;tr|A0A3Q0J7C6|A0A3Q0J7C6_DIACI Ran GTPase-activating protein 1 isoform X2 OS=Diaphorina citri OX=121845 GN=LOC103513674 PE=4 SV=1;tr	4	2	2	2	11.7	36.069		40088	42622	41355	60116	71331	18798	50081.7	0.825751	0.700957
A0A1S3DA94	Histone H2A	LOC103514550		tr|A0A1S3DA94|A0A1S3DA94_DIACI;tr|A0A1S3DIS4|A0A1S3DIS4_DIACI;tr|A0A1S3DSL4|A0A1S3DSL4_DIACI	tr|A0A1S3DA94|A0A1S3DA94_DIACI Histone H2A OS=Diaphorina citri OX=121845 GN=LOC103514550 PE=3 SV=1;tr|A0A1S3DIS4|A0A1S3DIS4_DIACI Histone H2A OS=Diaphorina citri OX=121845 GN=LOC103519432 PE=3 SV=1;tr|A0A1S3DSL4|A0A1S3DSL4_DIACI Histone H2A OS=Diaphorina c	3	5	5	3	60.5	13.382	6946900	8911100	8859900	8239300	8872300	8567000	7988000	8.47577e+06	0.972101	0.751287
A0A1S3DAC5	Uncharacterized protein LOC103513784	LOC103513784		tr|A0A1S3DAC5|A0A1S3DAC5_DIACI	tr|A0A1S3DAC5|A0A1S3DAC5_DIACI Uncharacterized protein LOC103513784 OS=Diaphorina citri OX=121845 GN=LOC103513784 PE=4 SV=1	1	2	1	1	18.4	22.994		49616	51885	50750.5	38445	63858	19986	40763	1.24501	0.586415
A0A1S3DAN0	Large ribosomal subunit protein eL38	LOC103514770		tr|A0A1S3DAN0|A0A1S3DAN0_DIACI	tr|A0A1S3DAN0|A0A1S3DAN0_DIACI Large ribosomal subunit protein eL38 OS=Diaphorina citri OX=121845 GN=LOC103514770 PE=3 SV=1	1	2	2	2	28.2	9.1998	55469	235680	619310	303486	738430	774710	482280	665140	0.456274	0.129769
A0A1S3DAN5	Uncharacterized protein LOC103514777	LOC103514777		tr|A0A1S3DAN5|A0A1S3DAN5_DIACI	tr|A0A1S3DAN5|A0A1S3DAN5_DIACI Uncharacterized protein LOC103514777 OS=Diaphorina citri OX=121845 GN=LOC103514777 PE=4 SV=1	1	2	2	2	4.4	83.025	36394	31062	33849	33768.3	36083	29412	21281	28925.3	1.16743	0.346989
A0A1S3DAP5	Uncharacterized protein LOC103514795	LOC103514795		tr|A0A1S3DAP5|A0A1S3DAP5_DIACI	tr|A0A1S3DAP5|A0A1S3DAP5_DIACI Uncharacterized protein LOC103514795 OS=Diaphorina citri OX=121845 GN=LOC103514795 PE=4 SV=1	1	1	1	1	14.4	15.729	20431	15634	16230	17431.7		12010	1503.9	6756.95	2.57981	0.092439
A0A1S3DAQ1	Protein LSM14 homolog A	LOC103514700		tr|A0A1S3DAQ1|A0A1S3DAQ1_DIACI	tr|A0A1S3DAQ1|A0A1S3DAQ1_DIACI Protein LSM14 homolog A OS=Diaphorina citri OX=121845 GN=LOC103514700 PE=3 SV=1	1	8	8	8	34.8	43.009	735910	686700	1003200	808603	902810	691520	302930	632420	1.27859	0.430902
A0A1S3DAR2	Uncharacterized protein LOC103514828 isoform X3	LOC103514828		tr|A0A1S3DAR2|A0A1S3DAR2_DIACI	tr|A0A1S3DAR2|A0A1S3DAR2_DIACI Uncharacterized protein LOC103514828 isoform X3 OS=Diaphorina citri OX=121845 GN=LOC103514828 PE=3 SV=2	1	5	1	1	18.1	41.967	400790	19476	257520	225929	1030.2	850.09		940.145	240.313	0.215064
A0A1S3DAS5	U6 snRNA-associated Sm-like protein LSm2	LOC103514923	FUNCTION: Binds specifically to the 3'-terminal U-tract of U6 snRNA. {ECO:0000256|PIRNR:PIRNR016394}.	tr|A0A1S3DAS5|A0A1S3DAS5_DIACI	tr|A0A1S3DAS5|A0A1S3DAS5_DIACI U6 snRNA-associated Sm-like protein LSm2 OS=Diaphorina citri OX=121845 GN=LOC103514923 PE=3 SV=1	1	1	1	1	17	12.789	350730	136910	186950	224863	161780	139830	95198	132269	1.70004	0.241906
A0A1S3DAT3	Protein NipSnap	LOC103514008		tr|A0A1S3DAT3|A0A1S3DAT3_DIACI	tr|A0A1S3DAT3|A0A1S3DAT3_DIACI Protein NipSnap OS=Diaphorina citri OX=121845 GN=LOC103514008 PE=3 SV=1	1	6	6	6	59.2	17.338	912650	709600	700040	774097	551040	598980	595010	581677	1.3308	0.0535568
A0A1S3DAU5	Glucose-6-phosphate isomerase	LOC103514039		tr|A0A1S3DAU5|A0A1S3DAU5_DIACI;CON__Q3ZBD7	tr|A0A1S3DAU5|A0A1S3DAU5_DIACI Glucose-6-phosphate isomerase OS=Diaphorina citri OX=121845 GN=LOC103514039 PE=3 SV=1	2	27	27	27	71.8	62.345	17381000	14111000	13500000	1.49973e+07	11754000	11530000	12834000	1.20393e+07	1.24569	0.0803748
A0A1S3DAV5	Late endosomal/lysosomal adaptor and MAPK and MTOR activator 4	LOC103514986		tr|A0A1S3DAV5|A0A1S3DAV5_DIACI	tr|A0A1S3DAV5|A0A1S3DAV5_DIACI Late endosomal/lysosomal adaptor and MAPK and MTOR activator 4 OS=Diaphorina citri OX=121845 GN=LOC103514986 PE=3 SV=1	1	3	3	3	47.9	13.146	91838	43945	9929.6	48570.9	99881	89170	158570	115874	0.419171	0.103964
A0A1S3DAY5	26S proteasome regulatory subunit 4-like	LOC103514125		tr|A0A1S3DAY5|A0A1S3DAY5_DIACI	tr|A0A1S3DAY5|A0A1S3DAY5_DIACI 26S proteasome regulatory subunit 4-like OS=Diaphorina citri OX=121845 GN=LOC103514125 PE=3 SV=1	1	8	8	6	24.4	49.057	1200000	691250	777910	889720	826820	672550	568410	689260	1.29083	0.31383
A0A1S3DB12	Deleted in autism protein 1	LOC103515042		tr|A0A1S3DB12|A0A1S3DB12_DIACI	tr|A0A1S3DB12|A0A1S3DB12_DIACI Deleted in autism protein 1 OS=Diaphorina citri OX=121845 GN=LOC103515042 PE=3 SV=1	1	1	1	1	4.3	44.755	45160	33809	27307	35425.3	22985	15661	28592	22412.7	1.58059	0.112653
A0A1S3DB14	Adenylate kinase-like	LOC103514940		tr|A0A1S3DB14|A0A1S3DB14_DIACI	tr|A0A1S3DB14|A0A1S3DB14_DIACI Adenylate kinase-like OS=Diaphorina citri OX=121845 GN=LOC103514940 PE=3 SV=1	1	5	5	5	52.9	16.282	578870	534000	551440	554770	502040	386480	631820	506780	1.0947	0.541851
A0A1S3DB18	GrpE protein homolog	LOC103514947	FUNCTION: Essential component of the PAM complex, a complex required for the translocation of transit peptide-containing proteins from the inner membrane into the mitochondrial matrix in an ATP-dependent manner. {ECO:0000256|RuleBase:RU000640}.	tr|A0A1S3DB18|A0A1S3DB18_DIACI	tr|A0A1S3DB18|A0A1S3DB18_DIACI GrpE protein homolog OS=Diaphorina citri OX=121845 GN=LOC103514947 PE=3 SV=1	1	3	3	2	42.2	11.337	564800	335950	507290	469347	339290	303100	153900	265430	1.76825	0.0840421
A0A1S3DB21	Thioredoxin domain-containing protein 5 homolog	LOC103515126		tr|A0A1S3DB21|A0A1S3DB21_DIACI	tr|A0A1S3DB21|A0A1S3DB21_DIACI Thioredoxin domain-containing protein 5 homolog OS=Diaphorina citri OX=121845 GN=LOC103515126 PE=3 SV=1	1	13	13	13	50.6	45.213	1027800	1195600	1333200	1.18553e+06	1410500	1163700	1163000	1.24573e+06	0.951675	0.644311
A0A1S3DB26	Uncharacterized protein LOC103515065 isoform X2	LOC103515065		tr|A0A1S3DB26|A0A1S3DB26_DIACI;tr|A0A1S3DBE4|A0A1S3DBE4_DIACI	tr|A0A1S3DB26|A0A1S3DB26_DIACI Uncharacterized protein LOC103515065 isoform X2 OS=Diaphorina citri OX=121845 GN=LOC103515065 PE=4 SV=1;tr|A0A1S3DBE4|A0A1S3DBE4_DIACI Uncharacterized protein LOC103515065 isoform X1 OS=Diaphorina citri OX=121845 GN=LOC103515	2	1	1	1	3.8	47.497	68987	55602	48964	57851	77291	71405	22373	57023	1.01452	0.966222
A0A1S3DB28	Uncharacterized protein LOC103514881	LOC103514881		tr|A0A1S3DB28|A0A1S3DB28_DIACI	tr|A0A1S3DB28|A0A1S3DB28_DIACI Uncharacterized protein LOC103514881 OS=Diaphorina citri OX=121845 GN=LOC103514881 PE=4 SV=1	1	2	2	2	15.5	22.097	59158	64976	106660	76931.3	80061	91876	55578	75838.3	1.01441	0.955446
A0A1S3DB40	Large ribosomal subunit protein uL2	LOC103514987		tr|A0A1S3DB40|A0A1S3DB40_DIACI	tr|A0A1S3DB40|A0A1S3DB40_DIACI Large ribosomal subunit protein uL2 OS=Diaphorina citri OX=121845 GN=LOC103514987 PE=3 SV=1	1	8	8	8	35.8	27.976	2071100	2154000	2800800	2.34197e+06	1623500	2384400	1311000	1.77297e+06	1.32093	0.221664
A0A1S3DB56	Adenylate kinase-like	LOC103514941		tr|A0A1S3DB56|A0A1S3DB56_DIACI	tr|A0A1S3DB56|A0A1S3DB56_DIACI Adenylate kinase-like OS=Diaphorina citri OX=121845 GN=LOC103514941 PE=3 SV=1	1	2	2	2	23.5	9.5759	17889	413570	187440	206300	174800	386660	196250	252570	0.816802	0.745318
A0A1S3DB58	Eukaryotic translation initiation factor 5B-like	LOC103514258		tr|A0A1S3DB58|A0A1S3DB58_DIACI	tr|A0A1S3DB58|A0A1S3DB58_DIACI Eukaryotic translation initiation factor 5B-like OS=Diaphorina citri OX=121845 GN=LOC103514258 PE=4 SV=1	1	4	4	4	17.8	41.404	1800100	1060900	1058100	1.30637e+06	1504600	1240500	1007000	1250700	1.04451	0.854994
A0A1S3DB61	Endonuclease	LOC103515098		tr|A0A1S3DB61|A0A1S3DB61_DIACI	tr|A0A1S3DB61|A0A1S3DB61_DIACI Endonuclease OS=Diaphorina citri OX=121845 GN=LOC103515098 PE=3 SV=1	1	5	5	5	27	34.064	270450	132180	123790	175473	181830	192280	142630	172247	1.01873	0.951539
A0A1S3DB76	Syntaxin-12-like	LOC103515048		tr|A0A1S3DB76|A0A1S3DB76_DIACI	tr|A0A1S3DB76|A0A1S3DB76_DIACI Syntaxin-12-like OS=Diaphorina citri OX=121845 GN=LOC103515048 PE=3 SV=1	1	3	3	3	16.7	32.344	70554	54044	62372	62323.3	90562	52824	96948	80111.3	0.777959	0.289159
A0A1S3DB94	Chemosensory protein 2	LOC103514997		tr|A0A1S3DB94|A0A1S3DB94_DIACI;tr|A0A1S3DAW3|A0A1S3DAW3_DIACI;tr|A0A2Z2GXF8|A0A2Z2GXF8_DIACI	tr|A0A1S3DB94|A0A1S3DB94_DIACI Chemosensory protein 2 OS=Diaphorina citri OX=121845 GN=LOC103514997 PE=2 SV=1;tr|A0A1S3DAW3|A0A1S3DAW3_DIACI Ejaculatory bulb-specific protein 3-like OS=Diaphorina citri OX=121845 GN=LOC103515000 PE=4 SV=1;tr|A0A2Z2GXF8|A0A2	3	3	3	3	28.9	14.838		145390	206990	176190	224200	262740	45360	177433	0.992993	0.989783
A0A1S3DMJ2	Cathepsin K-like	LOC103521260		tr|A0A1S3DMJ2|A0A1S3DMJ2_DIACI;tr|A0A1S3DB95|A0A1S3DB95_DIACI	tr|A0A1S3DMJ2|A0A1S3DMJ2_DIACI Cathepsin K-like OS=Diaphorina citri OX=121845 GN=LOC103521260 PE=3 SV=1;tr|A0A1S3DB95|A0A1S3DB95_DIACI Cathepsin L1-like OS=Diaphorina citri OX=121845 GN=LOC103515186 PE=3 SV=1	2	10	10	1	56.6	25.358	25217000	26568000	46106000	3.26303e+07	26864000	26661000	11955000	2.18267e+07	1.49498	0.265931
A0A1S3DBA0	Formin-binding protein 1-like isoform X3	LOC103515191		tr|A0A1S3DBA0|A0A1S3DBA0_DIACI;tr|A0A1S3DBI6|A0A1S3DBI6_DIACI;tr|A0A1S3DBH7|A0A1S3DBH7_DIACI	tr|A0A1S3DBA0|A0A1S3DBA0_DIACI Formin-binding protein 1-like isoform X3 OS=Diaphorina citri OX=121845 GN=LOC103515191 PE=4 SV=1;tr|A0A1S3DBI6|A0A1S3DBI6_DIACI Formin-binding protein 1-like isoform X1 OS=Diaphorina citri OX=121845 GN=LOC103515191 PE=4 SV=1;	3	2	2	2	4.9	69.31	164040	3313.1	41586	69646.4	44903	50431	65082	53472	1.30248	0.757163
A0A1S3DBA4	UBX domain-containing protein 1-B-like	LOC103515207		tr|A0A1S3DBA4|A0A1S3DBA4_DIACI;tr|A0A1S4ECK4|A0A1S4ECK4_DIACI;tr|A0A1S4ECY7|A0A1S4ECY7_DIACI	tr|A0A1S3DBA4|A0A1S3DBA4_DIACI UBX domain-containing protein 1-B-like OS=Diaphorina citri OX=121845 GN=LOC103515207 PE=4 SV=1;tr|A0A1S4ECK4|A0A1S4ECK4_DIACI UBX domain-containing protein 1-B-like OS=Diaphorina citri OX=121845 GN=LOC103510149 PE=4 SV=2;tr|A	3	4	4	4	22.9	36.51	302960	318900	275630	299163	412870	274680	307350	331633	0.902091	0.497543
A0A1S3DBC4	Uncharacterized protein LOC103515118 isoform X1	LOC103515118		tr|A0A1S3DBC4|A0A1S3DBC4_DIACI;tr|A0A3Q0JAH8|A0A3Q0JAH8_DIACI	tr|A0A1S3DBC4|A0A1S3DBC4_DIACI Uncharacterized protein LOC103515118 isoform X1 OS=Diaphorina citri OX=121845 GN=LOC103515118 PE=4 SV=1;tr|A0A3Q0JAH8|A0A3Q0JAH8_DIACI Uncharacterized protein LOC103515118 isoform X2 OS=Diaphorina citri OX=121845 GN=LOC103515	2	3	3	3	8	95.51	65294	69796	41305	58798.3		44382	70759	57570.5	1.02133	0.940175
A0A1S3DBC7	AP complex subunit sigma	LOC103515127		tr|A0A1S3DBC7|A0A1S3DBC7_DIACI	tr|A0A1S3DBC7|A0A1S3DBC7_DIACI AP complex subunit sigma OS=Diaphorina citri OX=121845 GN=LOC103515127 PE=3 SV=1	1	1	1	1	12.1	18.459	67888	45445	56983	56772	45841	39182	40286	41769.7	1.35917	0.0919892
A0A1S3DBE6	Transmembrane protein 50A-like	LOC103515350		tr|A0A1S3DBE6|A0A1S3DBE6_DIACI	tr|A0A1S3DBE6|A0A1S3DBE6_DIACI Transmembrane protein 50A-like OS=Diaphorina citri OX=121845 GN=LOC103515350 PE=3 SV=1	1	1	1	1	9.4	17.634	12137	40024	40952	31037.7		41742	64574	53158	0.583876	0.233794
A0A1S3DBF4	3-ketoacyl-CoA thiolase, mitochondrial isoform X1	LOC103514425		tr|A0A1S3DBF4|A0A1S3DBF4_DIACI	tr|A0A1S3DBF4|A0A1S3DBF4_DIACI 3-ketoacyl-CoA thiolase, mitochondrial isoform X1 OS=Diaphorina citri OX=121845 GN=LOC103514425 PE=3 SV=1	1	17	17	2	71.4	41.623	6570400	9523200	7281600	7.79173e+06	6646600	6582900	6443000	6557500	1.18822	0.238565
A0A1S3DBF6	Magnesium-dependent phosphatase 1-like	LOC103515168		tr|A0A1S3DBF6|A0A1S3DBF6_DIACI	tr|A0A1S3DBF6|A0A1S3DBF6_DIACI Magnesium-dependent phosphatase 1-like OS=Diaphorina citri OX=121845 GN=LOC103515168 PE=4 SV=1	1	3	3	3	41.5	16.242	237340	187960	270350	231883	145210	178060	165700	162990	1.42268	0.0557013
A0A1S3DBF9	Sodium/potassium-transporting ATPase subunit beta-2-like isoform X2	LOC103514430		tr|A0A1S3DBF9|A0A1S3DBF9_DIACI;tr|A0A3Q0J8C5|A0A3Q0J8C5_DIACI;tr|A0A1S4EHU8|A0A1S4EHU8_DIACI	tr|A0A1S3DBF9|A0A1S3DBF9_DIACI Sodium/potassium-transporting ATPase subunit beta-2-like isoform X2 OS=Diaphorina citri OX=121845 GN=LOC103514430 PE=3 SV=1;tr|A0A3Q0J8C5|A0A3Q0J8C5_DIACI Sodium/potassium-transporting ATPase subunit beta-2-like isoform X4 OS	3	9	9	9	41.9	37.908	299560	946530	1090400	778830	234690	415830	559780	403433	1.9305	0.223385
A0A1S3DBH8	Ervatamin-C-like	LOC103515421		tr|A0A1S3DBH8|A0A1S3DBH8_DIACI	tr|A0A1S3DBH8|A0A1S3DBH8_DIACI Ervatamin-C-like OS=Diaphorina citri OX=121845 GN=LOC103515421 PE=3 SV=1	1	8	8	5	38.9	36.924	2085300	2572600	2421300	2.35973e+06	2493400	1921800	2388600	2.26793e+06	1.04048	0.706803
[truncated: 2,138 more rows]

## Sheet: B
Protein	Protein Name	Gene Name	Function	ProteinGroup	FastaHeaders	Proteins	Peptides	RazorUniquePeptides	UniquePeptides	Coverage	MolWeight	LFQ intensity infected-1	LFQ intensity infected-2	LFQ intensity infected-3	LFQ intensity free-1	LFQ intensity free-2	LFQ intensity free-3
[truncated: 32 more rows]
