# Supplementary material for: An integrated proteomic and phosphoproteomic analysis reveals α-crystallin A and vitellogenin A1 as key players involved in CLas infection in Diaphorina citri
Source: Research Square preprint supplement (doi:10.21203/rs.3.rs-7919843/v1), 2026-01-30
Supplement: Supplementary file 2 [file d63899d2b879f0f89373e522.xlsx]

## Sheet: Total phosphopeptides
Protein	Proteins	Amino acid	Modified peptide	Position in peptide	Sequence length	Description	Protein Name	Gene Name	-10LgP	Mass	ppm	Start	End	AScore	PTMLocation	MotifSequence	Intensity free-1	Intensity free-2	Intensity free-3	Intensity infected-1	Intensity infected-2	Intensity infected-3	Identified or Quantified peptide	GO annotations	KO(Name)	Pathways	Subcellular localization	Domain
A0A1S3D116	A0A1S3D116|A0A1S3D116_DIACI	S	A(+42.01)DDEGFS(+79.97)WDDVEAIEEPK	7	18	Flightin OS=Diaphorina citri OX=121845 GN=LOC103508322 PE=4 SV=1	Flightin	LOC103508322	76.64	2172.84	3.8	2	19		S8	ADDEGFSWDDVEA	1286.55	3878.94	1173.36	504.949	5866.42	1982.73	Quantified
A0A1S3D116	A0A1S3D116|A0A1S3D116_DIACI	S	A(+42.01)DDEGFSWDDVEAIEEPKAEES(+79.97)AAETAEGPAAGAPAEK	22	38	Flightin OS=Diaphorina citri OX=121845 GN=LOC103508322 PE=4 SV=1	Flightin	LOC103508322	77.41	4010.67	-2.2	2	39	A1:Acetylation (Protein N-term):1000.00;S22:Phosphorylation (STY):11.12	S23	EPKAEESAAETAE	1188.63	888.067	1558.44	334.91	2189.15	610.478	Quantified
A0A3Q0J7F4	A0A3Q0J7F4|A0A3Q0J7F4_DIACI:A0A1S3DH41|A0A1S3DH41_DIACI	S	A(+42.01)DDNIEPDQAS(+79.97)FDK	11	14	Ubiquitin thioesterase OS=Diaphorina citri OX=121845 GN=LOC103516077 PE=3 SV=1	Ubiquitin thioesterase	LOC103516077	39.11	1685.65	4.7	2	15		S12	IEPDQASFDKGYS	1015.26	328.553	708.652	3088.92	1420.07	354.136	Quantified	GO:0071108(BP:protein K48-linked deubiquitination);GO:0005634(CC:nucleus);GO:0019784(MF:NEDD8-specific protease activity);GO:0004843(MF:thiol-dependent ubiquitin-specific protease activity);GO:0043130(MF:ubiquitin binding)				PF10275(Peptidase C65 Otubain)
A0A3Q0J7F4	A0A3Q0J7F4|A0A3Q0J7F4_DIACI:A0A1S3DH41|A0A1S3DH41_DIACI	S	A(+42.01)DDNIEPDQAS(+79.97)FDKGYSEDANQVNQDDLILQQSK	11	34	Ubiquitin thioesterase OS=Diaphorina citri OX=121845 GN=LOC103516077 PE=3 SV=1	Ubiquitin thioesterase	LOC103516077	70	3931.69	4.4	2	35	A1:Acetylation (Protein N-term):1000.00;S11:Phosphorylation (STY):5.81	S12	IEPDQASFDKGYS	1689.98	1546.83	2868.66	870.062	1596.44	3428.09	Quantified	GO:0071108(BP:protein K48-linked deubiquitination);GO:0005634(CC:nucleus);GO:0019784(MF:NEDD8-specific protease activity);GO:0004843(MF:thiol-dependent ubiquitin-specific protease activity);GO:0043130(MF:ubiquitin binding)				PF10275(Peptidase C65 Otubain)
A0A3Q0J7F4	A0A3Q0J7F4|A0A3Q0J7F4_DIACI:A0A1S3DH41|A0A1S3DH41_DIACI	Y	A(+42.01)DDNIEPDQASFDKGY(+79.97)SEDANQVNQDDLILQQSK	16	34	Ubiquitin thioesterase OS=Diaphorina citri OX=121845 GN=LOC103516077 PE=3 SV=1	Ubiquitin thioesterase	LOC103516077	77.96	3931.69	12.6	2	35	A1:Acetylation (Protein N-term):1000.00;Y16:Phosphorylation (STY):0.00	Y17	ASFDKGYSEDANQ	1689.98	1546.83	2868.66	1064.66	290.945	3733.57	Quantified	GO:0071108(BP:protein K48-linked deubiquitination);GO:0005634(CC:nucleus);GO:0019784(MF:NEDD8-specific protease activity);GO:0004843(MF:thiol-dependent ubiquitin-specific protease activity);GO:0043130(MF:ubiquitin binding)				PF10275(Peptidase C65 Otubain)
A0A3Q0II33	A0A3Q0II33|A0A3Q0II33_DIACI	T	A(+42.01)DDT(+79.97)EDEEIVVPEGQSNSDK	4	20	Dentin sialophosphoprotein-like OS=Diaphorina citri OX=121845 GN=LOC113465496 PE=4 SV=1	Dentin sialophosphoprotein-like	LOC113465496	51.04	2297.91	2.8	2	21	A1:Acetylation (Protein N-term):1000.00;T4:Phosphorylation (STY):54.40	T5	__MADDTEDEEIV	147.762	1460.5	250.363	920.45	150.864	923.283	Quantified
A0A3Q0IVB2	A0A3Q0IVB2|A0A3Q0IVB2_DIACI	S	A(+42.01)DFIDS(+79.97)EAEESEEEEELNEQER	6	22	Transcription elongation factor spt6 OS=Diaphorina citri OX=121845 GN=LOC103510308 PE=3 SV=1	Transcription elongation factor spt6	LOC103510308	57.83	2748.04	8.7	2	23	A1:Acetylation (Protein N-term):1000.00;S6:Phosphorylation (STY):30.64	S7	MADFIDSEAEESE	212.558	117.111	104.266	203.385	78.1355	73.7915	Quantified	GO:0032968(BP:positive regulation of transcription elongation from RNA polymerase II promoter);GO:0005634(CC:nucleus);GO:0003677(MF:DNA binding);GO:0003746(MF:translation elongation factor activity)			Nucleus	PF14641(Helix-turn-helix DNA-binding domain of SPT6);PF00575(S1 RNA binding domain);PF14635(Helix-hairpin-helix motif);PF14632(Acidic N-terminal SPT6);PF14633(SH2 domain);PF14878(Death-like domain of SPT6);PF14639(Holliday-junction resolvase-like of SPT6)
A0A3Q0IVB2	A0A3Q0IVB2|A0A3Q0IVB2_DIACI	S	A(+42.01)DFIDSEAEES(+79.97)EEEEELNEQER	11	22	Transcription elongation factor spt6 OS=Diaphorina citri OX=121845 GN=LOC103510308 PE=3 SV=1	Transcription elongation factor spt6	LOC103510308	73.13	2748.04	-1.7	2	23	A1:Acetylation (Protein N-term):1000.00;S11:Phosphorylation (STY):62.80	S12	DSEAEESEEEEEL	212.558		181.452	196.145	304.216	213.394	Quantified	GO:0032968(BP:positive regulation of transcription elongation from RNA polymerase II promoter);GO:0005634(CC:nucleus);GO:0003677(MF:DNA binding);GO:0003746(MF:translation elongation factor activity)			Nucleus	PF14641(Helix-turn-helix DNA-binding domain of SPT6);PF00575(S1 RNA binding domain);PF14635(Helix-hairpin-helix motif);PF14632(Acidic N-terminal SPT6);PF14633(SH2 domain);PF14878(Death-like domain of SPT6);PF14639(Holliday-junction resolvase-like of SPT6)
A0A1S3CU39	A0A1S3CU39|A0A1S3CU39_DIACI	S	A(+42.01)DIVS(+79.97)DISIIQDEDQLR	5	17	Uncharacterized protein LOC103505283 OS=Diaphorina citri OX=121845 GN=LOC103505283 PE=4 SV=1	Uncharacterized protein LOC103505283	LOC103505283	47.84	2050.95	-4.8	2	18	A1:Acetylation (Protein N-term):1000.00;S5:Phosphorylation (STY):40.63	S6	_MADIVSDISIIQ	1233	1579.54	735.604	587.2	2203.93	1959.41	Quantified					PF12510(Smoothelin cytoskeleton protein)
A0A3Q0IMG8	A0A3Q0IMG8|A0A3Q0IMG8_DIACI	S	A(+42.01)DS(+79.97)DDEYDR	3	9	Serrate RNA effector molecule homolog OS=Diaphorina citri OX=121845 GN=LOC108254592 PE=4 SV=1	Serrate RNA effector molecule homolog	LOC108254592	40.47	1206.37	2.8	2	10	A1:Acetylation (Protein N-term):1000.00;S3:Phosphorylation (STY):42.68	S4	___MADSDDEYDR	1985.73	422.464	1241.71	4245.12	3475.87	2743.29	Quantified	GO:0006397(BP:mRNA processing)				PF12066(Domain of unknown function (DUF3546))
A0A1S3DH05	A0A1S3DH05|A0A1S3DH05_DIACI	T	A(+42.01)DT(+79.97)APAT(+79.97)PVAPAAASAETPK	3	20	Histone H1-like OS=Diaphorina citri OX=121845 GN=LOC103518306 PE=3 SV=1	Histone H1-like	LOC103518306	53.46	2037.87	2.5	2	21	A1:Acetylation (Protein N-term):1000.00;T3:Phosphorylation (STY):64.80;T7:Phosphorylation (STY):49.04	T4	___MADTAPATPV	677.246	2037.3	1325.39	1081.8	1171.59	138.327	Quantified	GO:0006334(BP:nucleosome assembly);GO:0042025(CC:host cell nucleus);GO:0000786(CC:nucleosome);GO:0005634(CC:nucleus);GO:0003677(MF:DNA binding)			Chromosome;Nucleus	PF00538(linker histone H1 and H5 family)
A0A1S3DH05	A0A1S3DH05|A0A1S3DH05_DIACI	T	A(+42.01)DT(+79.97)APAT(+79.97)PVAPAAASAETPK	7	20	Histone H1-like OS=Diaphorina citri OX=121845 GN=LOC103518306 PE=3 SV=1	Histone H1-like	LOC103518306	53.46	2037.87	2.5	2	21	A1:Acetylation (Protein N-term):1000.00;T3:Phosphorylation (STY):64.80;T7:Phosphorylation (STY):49.04	T8	ADTAPATPVAPAA	677.246	2037.3	1325.39	1081.8	1171.59	138.327	Quantified	GO:0006334(BP:nucleosome assembly);GO:0042025(CC:host cell nucleus);GO:0000786(CC:nucleosome);GO:0005634(CC:nucleus);GO:0003677(MF:DNA binding)			Chromosome;Nucleus	PF00538(linker histone H1 and H5 family)
A0A1S3DH05	A0A1S3DH05|A0A1S3DH05_DIACI	T	A(+42.01)DT(+79.97)APATPVAPAAASAETPK	3	20	Histone H1-like OS=Diaphorina citri OX=121845 GN=LOC103518306 PE=3 SV=1	Histone H1-like	LOC103518306	44.99	1957.9	-3.1	2	21	A1:Acetylation (Protein N-term):1000.00;T3:Phosphorylation (STY):0.00	T4	___MADTAPATPV	222.168		969.752	95.02	1253.33	1063.98	Quantified	GO:0006334(BP:nucleosome assembly);GO:0042025(CC:host cell nucleus);GO:0000786(CC:nucleosome);GO:0005634(CC:nucleus);GO:0003677(MF:DNA binding)			Chromosome;Nucleus	PF00538(linker histone H1 and H5 family)
A0A1S3DIN6	A0A1S3DIN6|A0A1S3DIN6_DIACI	T	A(+42.01)DTAPAIAAPSAET(+79.97)PK	14	16	Histone H1E-like OS=Diaphorina citri OX=121845 GN=LOC103519434 PE=3 SV=1	Histone H1E-like	LOC103519434	49.12	1631.74	-0.5	2	17	A1:Acetylation (Protein N-term):1000.00;T14:Phosphorylation (STY):6.63	T15	AAPSAETPKGKGK	493.913	536.316	135.545	1308.28	1067.93	315.85	Quantified	GO:0006334(BP:nucleosome assembly);GO:0042025(CC:host cell nucleus);GO:0000786(CC:nucleosome);GO:0005634(CC:nucleus);GO:0003677(MF:DNA binding)			Chromosome;Nucleus	PF00538(linker histone H1 and H5 family)
A0A1S3DH05	A0A1S3DH05|A0A1S3DH05_DIACI	T	A(+42.01)DTAPAT(+79.97)PVAPAAASAET(+79.97)PK	7	20	Histone H1-like OS=Diaphorina citri OX=121845 GN=LOC103518306 PE=3 SV=1	Histone H1-like	LOC103518306	32.24	2037.87	2	2	21	A1:Acetylation (Protein N-term):1000.00;T7:Phosphorylation (STY):32.48;T18:Phosphorylation (STY):7.77	T8	ADTAPATPVAPAA	103.834	2037.3	1325.39	556.378	488.075	2376	Quantified	GO:0006334(BP:nucleosome assembly);GO:0042025(CC:host cell nucleus);GO:0000786(CC:nucleosome);GO:0005634(CC:nucleus);GO:0003677(MF:DNA binding)			Chromosome;Nucleus	PF00538(linker histone H1 and H5 family)
A0A1S3DH05	A0A1S3DH05|A0A1S3DH05_DIACI	T	A(+42.01)DTAPAT(+79.97)PVAPAAASAET(+79.97)PK	18	20	Histone H1-like OS=Diaphorina citri OX=121845 GN=LOC103518306 PE=3 SV=1	Histone H1-like	LOC103518306	32.24	2037.87	2	2	21	A1:Acetylation (Protein N-term):1000.00;T7:Phosphorylation (STY):32.48;T18:Phosphorylation (STY):7.77	T19	AAASAETPKGKGK	103.834	2037.3	1325.39	556.378	488.075	2376	Quantified	GO:0006334(BP:nucleosome assembly);GO:0042025(CC:host cell nucleus);GO:0000786(CC:nucleosome);GO:0005634(CC:nucleus);GO:0003677(MF:DNA binding)			Chromosome;Nucleus	PF00538(linker histone H1 and H5 family)
A0A1S3DH05	A0A1S3DH05|A0A1S3DH05_DIACI	T	A(+42.01)DTAPAT(+79.97)PVAPAAASAETPK	7	20	Histone H1-like OS=Diaphorina citri OX=121845 GN=LOC103518306 PE=3 SV=1	Histone H1-like	LOC103518306	68.42	1957.9	1	2	21	A1:Acetylation (Protein N-term):1000.00;T7:Phosphorylation (STY):46.31	T8	ADTAPATPVAPAA	23903.9	49964.2	48134.4	14746.1	24707.6	22656.4	Quantified	GO:0006334(BP:nucleosome assembly);GO:0042025(CC:host cell nucleus);GO:0000786(CC:nucleosome);GO:0005634(CC:nucleus);GO:0003677(MF:DNA binding)			Chromosome;Nucleus	PF00538(linker histone H1 and H5 family)
A0A1S3DH05	A0A1S3DH05|A0A1S3DH05_DIACI	T	A(+42.01)DTAPATPVAPAAASAET(+79.97)PK	18	20	Histone H1-like OS=Diaphorina citri OX=121845 GN=LOC103518306 PE=3 SV=1	Histone H1-like	LOC103518306	61.03	1957.9	1.6	2	21	A1:Acetylation (Protein N-term):1000.00;T18:Phosphorylation (STY):9.42	T19	AAASAETPKGKGK	4361.04	5409.47	2875.73	1675.47	9301.68	11064.5	Quantified	GO:0006334(BP:nucleosome assembly);GO:0042025(CC:host cell nucleus);GO:0000786(CC:nucleosome);GO:0005634(CC:nucleus);GO:0003677(MF:DNA binding)			Chromosome;Nucleus	PF00538(linker histone H1 and H5 family)
A0A3Q0IPS3	A0A3Q0IPS3|A0A3Q0IPS3_DIACI	S	A(+42.01)DTEINKS(+79.97)DS(+79.97)DEPQQK	8	16	Uncharacterized protein LOC103505159 OS=Diaphorina citri OX=121845 GN=LOC103505159 PE=4 SV=1	Uncharacterized protein LOC103505159	LOC103505159	51.43	2005.76	0.9	2	17	A1:Acetylation (Protein N-term):1000.00;S8:Phosphorylation (STY):45.16;S10:Phosphorylation (STY):52.22	S9	DTEINKSDSDEPQ	35890.6	38129	23576.2	32903.5	42861.9	44766.5	Quantified
A0A3Q0IPS3	A0A3Q0IPS3|A0A3Q0IPS3_DIACI	S	A(+42.01)DTEINKS(+79.97)DS(+79.97)DEPQQK	10	16	Uncharacterized protein LOC103505159 OS=Diaphorina citri OX=121845 GN=LOC103505159 PE=4 SV=1	Uncharacterized protein LOC103505159	LOC103505159	51.43	2005.76	0.9	2	17	A1:Acetylation (Protein N-term):1000.00;S8:Phosphorylation (STY):45.16;S10:Phosphorylation (STY):52.22	S11	EINKSDSDEPQQK	35890.6	38129	23576.2	32903.5	42861.9	44766.5	Quantified
A0A3Q0IPS3	A0A3Q0IPS3|A0A3Q0IPS3_DIACI	S	A(+42.01)DTEINKS(+79.97)DSDEPQQK	8	16	Uncharacterized protein LOC103505159 OS=Diaphorina citri OX=121845 GN=LOC103505159 PE=4 SV=1	Uncharacterized protein LOC103505159	LOC103505159	62.7	1925.79	2.8	2	17	A1:Acetylation (Protein N-term):1000.00;S8:Phosphorylation (STY):28.86	S9	DTEINKSDSDEPQ	147909	160634	158075	190242	130978	111750	Quantified
A0A3Q0IUJ0	A0A3Q0IUJ0|A0A3Q0IUJ0_DIACI	S	A(+42.01)DTES(+79.97)WSNGGESDGSLK	5	17	tRNA (Uracil-5-)-methyltransferase homolog A-like OS=Diaphorina citri OX=121845 GN=LOC103509924 PE=4 SV=1	tRNA (Uracil-5-)-methyltransferase homolog A-like	LOC103509924	31.36	1860.71	0.5	2	18	A1:Acetylation (Protein N-term):1000.00;S5:Phosphorylation (STY):0.00	S6	_MADTESWSNGGE	638.337	630.709	869.699	848.557	654.846	28.6907	Quantified	GO:0032259(BP:methylation);GO:0008168(MF:methyltransferase activity)
A0A3Q0IUJ0	A0A3Q0IUJ0|A0A3Q0IUJ0_DIACI	S	A(+42.01)DTESWS(+79.97)NGGESDGSLK	7	17	tRNA (Uracil-5-)-methyltransferase homolog A-like OS=Diaphorina citri OX=121845 GN=LOC103509924 PE=4 SV=1	tRNA (Uracil-5-)-methyltransferase homolog A-like	LOC103509924	53.06	1860.71	2.2	2	18	A1:Acetylation (Protein N-term):1000.00;S7:Phosphorylation (STY):45.01	S8	ADTESWSNGGESD	373.692	778.888	103.957	848.557	654.846	905.793	Quantified	GO:0032259(BP:methylation);GO:0008168(MF:methyltransferase activity)
A0A3Q0IUJ0	A0A3Q0IUJ0|A0A3Q0IUJ0_DIACI	S	A(+42.01)DTESWS(+79.97)NGGESDGSLKR	7	18	tRNA (Uracil-5-)-methyltransferase homolog A-like OS=Diaphorina citri OX=121845 GN=LOC103509924 PE=4 SV=1	tRNA (Uracil-5-)-methyltransferase homolog A-like	LOC103509924	40.08	2016.81	-0.6	2	19	A1:Acetylation (Protein N-term):1000.00;S7:Phosphorylation (STY):4.73	S8	ADTESWSNGGESD	1191.96	362.874	1196.18	1668.39	916.628	221.326	Quantified	GO:0032259(BP:methylation);GO:0008168(MF:methyltransferase activity)
A0A3Q0IUJ0	A0A3Q0IUJ0|A0A3Q0IUJ0_DIACI	S	A(+42.01)DTESWSNGGES(+79.97)DGSLKR	12	18	tRNA (Uracil-5-)-methyltransferase homolog A-like OS=Diaphorina citri OX=121845 GN=LOC103509924 PE=4 SV=1	tRNA (Uracil-5-)-methyltransferase homolog A-like	LOC103509924	40.5	2016.81	0.9	2	19	A1:Acetylation (Protein N-term):1000.00;S12:Phosphorylation (STY):5.77	S13	WSNGGESDGSLKR	1836.44	1345.87	1029.51	2958.23	5324.12	2694.31	Quantified	GO:0032259(BP:methylation);GO:0008168(MF:methyltransferase activity)
A0A3Q0JLD8	A0A3Q0JLD8|A0A3Q0JLD8_DIACI	S	A(+42.01)EIC(+57.02)EKLS(+79.97)PK	8	10	Sodium/hydrogen exchanger 9B2 OS=Diaphorina citri OX=121845 GN=LOC103524295 PE=4 SV=1	Sodium/hydrogen exchanger 9B2	LOC103524295	35.62	1295.58	-2.2	2	11	C4:Carbamidomethylation:1000.00	S9	EICEKLSPKLSQK	3028.81	5370.47	4515.43	2901.37	2728.06	5309.49	Quantified	GO:0016021(CC:integral component of membrane);GO:0015299(MF:solute:proton antiporter activity)				PF00999(Sodium/hydrogen exchanger family)
A0A1S3D726	A0A1S3D726|A0A1S3D726_DIACI	S	A(+42.01)ETDSSATNGNS(+79.97)GAEAEVSK	12	20	La protein homolog isoform X1 OS=Diaphorina citri OX=121845 GN=LOC103511897 PE=4 SV=1	La protein homolog isoform X1	LOC103511897	59.74	2045.81	1.4	2	21	A1:Acetylation (Protein N-term):1000.00;S12:Phosphorylation (STY):33.81	S13	SATNGNSGAEAEV	148.97	1211.96	307.801	3407.45	2412.79	3163.8	Quantified	GO:0006396(BP:RNA processing);GO:0005634(CC:nucleus);GO:1990904(CC:ribonucleoprotein complex);GO:0003723(MF:RNA binding)				PF05383(La domain);PF00076(RNA recognition motif. (a.k.a. RRM, RBD, or RNP domain));PF08777(RNA binding motif)
A0A3Q0JEI3	A0A3Q0JEI3|A0A3Q0JEI3_DIACI	S	A(+42.01)NLFSS(+79.97)VGQLLR	6	12	Uncharacterized protein LOC113471678 OS=Diaphorina citri OX=121845 GN=LOC113471678 PE=4 SV=1	Uncharacterized protein LOC113471678	LOC113471678	43.43	1425.7	-1.2	2	13	A1:Acetylation (Protein N-term):1000.00;S6:Phosphorylation (STY):12.28	S7	MANLFSSVGQLLR				55.1335	343.971		Quantified
A0A3Q0JAI0	A0A3Q0JAI0|A0A3Q0JAI0_DIACI	S	A(+42.01)NTSAAGGDS(+79.97)PK	10	12	Bifunctional 3'-phosphoadenosine 5'-phosphosulfate synthase-like OS=Diaphorina citri OX=121845 GN=LOC103517628 PE=4 SV=1	Bifunctional 3'-phosphoadenosine 5'-phosphosulfate synthase-like	LOC103517628	49.58	1196.47	2.1	2	13	A1:Acetylation (Protein N-term):1000.00;S10:Phosphorylation (STY):55.13	S11	SAAGGDSPKAKDV	223.797	50752.4	83665.3	153967	135814	106180	Quantified	GO:0004781(MF:sulfate adenylyltransferase (ATP) activity)	K13811(NA)	ko00230(Purine metabolism);ko00261(Monobactam biosynthesis);ko00450(Selenocompound metabolism);ko00920(Sulfur metabolism)		PF01747(ATP-sulfurylase);PF14306(PUA-like domain);PF01583(Adenylylsulphate kinase)
A0A3Q0JR50	A0A3Q0JR50|A0A3Q0JR50_DIACI	S	A(+42.01)QTSS(+79.97)PVSK	5	9	Uncharacterized protein LOC113473966 OS=Diaphorina citri OX=121845 GN=LOC113473966 PE=4 SV=1	Uncharacterized protein LOC113473966	LOC113473966	35.58	1025.44	2.8	2	10	A1:Acetylation (Protein N-term):1000.00;S5:Phosphorylation (STY):12.28	S6	_MAQTSSPVSKSS	6652.45	163.279	262.066	905.052	646.518	125.244	Quantified
A0A1S3D2T8	A0A1S3D2T8|A0A1S3D2T8_DIACI	S	A(+42.01)S(+79.97)APVSSYMLSPSEQPK	2	17	Peptide transporter family 1-like OS=Diaphorina citri OX=121845 GN=LOC103510323 PE=3 SV=1	Peptide transporter family 1-like	LOC103510323	48.9	1899.83	3.6	2	18	A1:Acetylation (Protein N-term):1000.00;S2:Phosphorylation (STY):42.68	S3	____MASAPVSSY	1323.51	811.511	1181.45	813.276	332.255	454.798	Quantified	GO:0006857(BP:oligopeptide transport);GO:0016021(CC:integral component of membrane);GO:0022857(MF:transmembrane transporter activity)			Membrane;Multi-pass membrane protein	PF00854(POT family)
A0A1S3D1A8	A0A1S3D1A8|A0A1S3D1A8_DIACI	S	A(+42.01)S(+79.97)GVTVSDIC(+57.02)K	2	11	Cofilin/actin-depolymerizing factor homolog isoform X1 OS=Diaphorina citri OX=121845 GN=LOC103509384 PE=3 SV=2	Cofilin/actin-depolymerizing factor homolog isoform X1	LOC103509384	68.35	1257.53	-1.3	2	12	A1:Acetylation (Protein N-term):1000.00;S2:Phosphorylation (STY):62.26;C10:Carbamidomethylation:1000.00	S3	____MASGVTVSD	171029	123451	224970	151848	175745	117016	Quantified	GO:0030042(BP:actin filament depolymerization);GO:0015629(CC:actin cytoskeleton);GO:0003779(MF:actin binding)	K05765(NA)	ko04810(Regulation of actin cytoskeleton)		PF00241(Cofilin/tropomyosin-type actin-binding protein)
A0A1S3CZ93	A0A1S3CZ93|A0A1S3CZ93_DIACI	S	A(+42.01)S(+79.97)PAPKS(+79.97)PELSEK	2	13	NEDD8-activating enzyme E1 regulatory subunit OS=Diaphorina citri OX=121845 GN=LOC103508129 PE=3 SV=1	NEDD8-activating enzyme E1 regulatory subunit	LOC103508129	45.32	1541.64	2.2	2	14	A1:Acetylation (Protein N-term):1000.00;S2:Phosphorylation (STY):58.98;S7:Phosphorylation (STY):28.70	S3	____MASPAPKSP	14097.3	22885	28135.3	33128.6	18976.3	21347.9	Quantified	GO:0045116(BP:protein neddylation);GO:0019781(MF:NEDD8 activating enzyme activity)				PF00899(ThiF family)
A0A1S3CZ93	A0A1S3CZ93|A0A1S3CZ93_DIACI	S	A(+42.01)S(+79.97)PAPKS(+79.97)PELSEK	7	13	NEDD8-activating enzyme E1 regulatory subunit OS=Diaphorina citri OX=121845 GN=LOC103508129 PE=3 SV=1	NEDD8-activating enzyme E1 regulatory subunit	LOC103508129	45.32	1541.64	2.2	2	14	A1:Acetylation (Protein N-term):1000.00;S2:Phosphorylation (STY):58.98;S7:Phosphorylation (STY):28.70	S8	ASPAPKSPELSEK	14097.3	22885	28135.3	33128.6	18976.3	21347.9	Quantified	GO:0045116(BP:protein neddylation);GO:0019781(MF:NEDD8 activating enzyme activity)				PF00899(ThiF family)
A0A1S3D9E7	A0A1S3D9E7|A0A1S3D9E7_DIACI	S	A(+42.01)S(+79.97)PPPTKPPR	2	10	Exocyst complex component 4-like OS=Diaphorina citri OX=121845 GN=LOC103513949 PE=4 SV=1	Exocyst complex component 4-like	LOC103513949	54.89	1168.56	-2.1	2	11	A1:Acetylation (Protein N-term):1000.00;S2:Phosphorylation (STY):52.86	S3	____MASPPPTKP	14685.5	14972.9	20134.5	26399.3	14370.4	10580.9	Quantified	GO:0006810(BP:transport)
A0A1S3DCD9	A0A1S3DCD9|A0A1S3DCD9_DIACI	S	A(+42.01)S(+79.97)QTQGIQQLLAAEK	2	15	V-type proton ATPase subunit G OS=Diaphorina citri OX=121845 GN=LOC103515954 PE=3 SV=1	V-type proton ATPase subunit G	LOC103515954	65.08	1706.82	2.3	2	16	A1:Acetylation (Protein N-term):1000.00;S2:Phosphorylation (STY):5.99	S3	____MASQTQGIQ	807.232	130.766	644.609	325.241	384.495	122.357	Quantified	GO:1902600(BP:proton transmembrane transport);GO:0016471(CC:vacuolar proton-transporting V-type ATPase complex);GO:0042626(MF:ATPase activity, coupled to transmembrane movement of substances)	K02152(NA)	ko00190(Oxidative phosphorylation);ko04145(Phagosome);ko04150(mTOR signaling pathway)		PF03179(Vacuolar (H+)-ATPase G subunit)
A0A1S3DEZ8	A0A1S3DEZ8|A0A1S3DEZ8_DIACI	S	A(+42.01)S(+79.97)SAEYLAEISEYVESNK	2	18	Cytosolic non-specific dipeptidase OS=Diaphorina citri OX=121845 GN=LOC103517369 PE=3 SV=1	Cytosolic non-specific dipeptidase	LOC103517369	53.12	2110.9	0.7	2	19	A1:Acetylation (Protein N-term):1000.00;S2:Phosphorylation (STY):0.00	S3	____MASSAEYLA	238.685	305.141			229.847		Quantified	GO:0008237(MF:metallopeptidase activity)				PF01546(Peptidase family M20/M25/M40)
A0A1S4EJQ5	A0A1S4EJQ5|A0A1S4EJQ5_DIACI:A0A1S3DPZ9|A0A1S3DPZ9_DIACI:A0A1S3DCX2|A0A1S3DCX2_DIACI	S	A(+42.01)S(+79.97)SDSAPDDSLYPIAVLIDELK	2	22	Serine/threonine-protein phosphatase 2A 65 kDa regulatory subunit A alpha isoform OS=Diaphorina citri OX=121845 GN=LOC103516057 PE=4 SV=1	Serine/threonine-protein phosphatase 2A 65 kDa regulatory subunit A alpha isoform	LOC103516057	52.76	2440.13	-3.9	2	23	A1:Acetylation (Protein N-term):1000.00;S2:Phosphorylation (STY):0.00	S3	____MASSDSAPD	90.5454	1267.71			223.471	237.536	Quantified	GO:0006461(NA:NA);GO:0034047(NA:NA)	K03456(NA)	ko03015(mRNA surveillance pathway);ko04071(Sphingolipid signaling pathway);ko04110(Cell cycle);ko04111(Cell cycle - yeast);ko04113(Meiosis - yeast);ko04114(Oocyte meiosis);ko04151(PI3K-Akt signaling pathway);ko04152(AMPK signaling pathway);ko04350(TGF-beta signaling pathway);ko04390(Hippo signaling pathway);ko04391(Hippo signaling pathway - fly);ko04530(Tight junction)		PF13646(HEAT repeats)
A0A1S3DIU9	A0A1S3DIU9|A0A1S3DIU9_DIACI	S	A(+42.01)S(+79.97)TEQIPSEK	2	10	Uncharacterized protein LOC103519345 OS=Diaphorina citri OX=121845 GN=LOC103519345 PE=4 SV=2	Uncharacterized protein LOC103519345	LOC103519345	58.21	1210.51	-2	2	11	A1:Acetylation (Protein N-term):1000.00;S2:Phosphorylation (STY):14.02	S3	____MASTEQIPS	35765	16824.1	28517.3	44835.7	22504.2	24224.4	Quantified	GO:0003676(MF:nucleic acid binding)				PF00313('Cold-shock' DNA-binding domain)
A0A1S3CZ93	A0A1S3CZ93|A0A1S3CZ93_DIACI	S	A(+42.01)SPAPKS(+79.97)PELSEK	7	13	NEDD8-activating enzyme E1 regulatory subunit OS=Diaphorina citri OX=121845 GN=LOC103508129 PE=3 SV=1	NEDD8-activating enzyme E1 regulatory subunit	LOC103508129	56.67	1461.68	-6.2	2	14	A1:Acetylation (Protein N-term):1000.00;S7:Phosphorylation (STY):77.13	S8	ASPAPKSPELSEK	6630.97	13739.1	13136.7	18073.7	17700.5	16810.5	Quantified	GO:0045116(BP:protein neddylation);GO:0019781(MF:NEDD8 activating enzyme activity)				PF00899(ThiF family)
A0A1S3DIU9	A0A1S3DIU9|A0A1S3DIU9_DIACI	S	A(+42.01)STEQIPS(+79.97)EK	8	10	Uncharacterized protein LOC103519345 OS=Diaphorina citri OX=121845 GN=LOC103519345 PE=4 SV=2	Uncharacterized protein LOC103519345	LOC103519345	35.94	1210.51	0	2	11	A1:Acetylation (Protein N-term):1000.00;S8:Phosphorylation (STY):47.92	S9	STEQIPSEKNDSV	591.855	16824.1	57.7009	1678.98	22504.2	159.307	Quantified	GO:0003676(MF:nucleic acid binding)				PF00313('Cold-shock' DNA-binding domain)
A0A1S4EID2	A0A1S4EID2|A0A1S4EID2_DIACI	T	A(+42.01)T(+79.97)SNVFAM(+15.99)FDQAQIQNFK	2	18	Myosin regulatory light chain sqh OS=Diaphorina citri OX=121845 GN=LOC103515046 PE=4 SV=1	Myosin regulatory light chain sqh	LOC103515046	33.4	2196.96	8.7	20	37	A1:Acetylation (Protein N-term):1000.00;T2:Phosphorylation (STY):0.00;M8:Oxidation (M):1000.00	T21	KRAQRATSNVFAM	453.626	330.802	7342.26	265.684	233.566	439.371	Quantified	GO:0005509(MF:calcium ion binding)	K12757(NA)	ko04510(Focal adhesion);ko04520(Adherens junction);ko04530(Tight junction);ko04810(Regulation of actin cytoskeleton);ko04814(Motor proteins)		PF13405(EF-hand domain)
A0A3Q0JHL7	A0A3Q0JHL7|A0A3Q0JHL7_DIACI	T	A(+42.01)TGDVIQPGPGLDT(+79.97)QSIDINQVETQLK	14	27	Uncharacterized protein LOC113471556 OS=Diaphorina citri OX=121845 GN=LOC113471556 PE=3 SV=1	Uncharacterized protein LOC113471556	LOC113471556	57.53	2958.42	-5	2	28	A1:Acetylation (Protein N-term):1000.00;T14:Phosphorylation (STY):0.00	T15	PGPGLDTQSIDIN	4229.22	1429	2971.2	2738.96	4725	6686.61	Quantified	GO:0008017(MF:microtubule binding)
A0A3Q0JHL7	A0A3Q0JHL7|A0A3Q0JHL7_DIACI	S	A(+42.01)TGDVIQPGPGLDTQS(+79.97)IDINQVETQLK	16	27	Uncharacterized protein LOC113471556 OS=Diaphorina citri OX=121845 GN=LOC113471556 PE=3 SV=1	Uncharacterized protein LOC113471556	LOC113471556	75.92	2958.42	1.5	2	28	A1:Acetylation (Protein N-term):1000.00;S16:Phosphorylation (STY):0.00	S17	PGLDTQSIDINQV	45013.4	1429	2971.2	2738.96	24174.1	6686.61	Quantified	GO:0008017(MF:microtubule binding)
A0A3Q0JDK9	A0A3Q0JDK9|A0A3Q0JDK9_DIACI	S	A(+42.01)TGDVIQPGPGPDTQS(+79.97)IDINQVETQLK	16	27	Uncharacterized protein LOC103519218 OS=Diaphorina citri OX=121845 GN=LOC103519218 PE=3 SV=1	Uncharacterized protein LOC103519218	LOC103519218	77.76	2942.39	0.7	2	28	A1:Acetylation (Protein N-term):1000.00;S16:Phosphorylation (STY):30.83	S17	PGPDTQSIDINQV	79078.8	35735.4	39934.2	14777.9	48824.1	15631.9	Quantified	GO:0008017(MF:microtubule binding)
A0A3Q0IJ17	A0A3Q0IJ17|A0A3Q0IJ17_DIACI	S	A(+42.01)TLTRPKS(+79.97)PRPPVSAK	8	16	Beta-parvin isoform X1 OS=Diaphorina citri OX=121845 GN=LOC103504926 PE=3 SV=1	Beta-parvin isoform X1	LOC103504926	26.82	1826.98	4.4	2	17	A1:Acetylation (Protein N-term):1000.00;S8:Phosphorylation (STY):5.14	S9	TLTRPKSPRPPVS	351.679	1138.28	2555.78	104.599	253.878	454.197	Quantified	GO:0031532(BP:actin cytoskeleton reorganization);GO:0007155(BP:cell adhesion);GO:0003779(MF:actin binding)	K06275(NA)	ko04510(Focal adhesion)		PF00307(Calponin homology (CH) domain)
A0A1S3CYV6	A0A1S3CYV6|A0A1S3CYV6_DIACI:A0A3Q0IVQ9|A0A3Q0IVQ9_DIACI	S	AAAAS(+79.97)LIESQVNK	5	13	Uncharacterized protein LOC103507921 isoform X1 OS=Diaphorina citri OX=121845 GN=LOC103507921 PE=4 SV=1	Uncharacterized protein LOC103507921 isoform X1	LOC103507921	44.08	1380.66	-3.3	36	48	S5:Phosphorylation (STY):33.81	S40	KKAAAASLIESQV	233.659	159.705	249.598	210.534	198.068	126.988	Quantified
A0A3Q0JD68	A0A3Q0JD68|A0A3Q0JD68_DIACI	Y	AAADNVSSAGLQNLLY(+79.97)DSPSPPSPSITVEPTKR	16	33	Patronin-like OS=Diaphorina citri OX=121845 GN=LOC103516486 PE=4 SV=1	Patronin-like	LOC103516486	42.86	3461.67	-0.1	469	501	Y16:Phosphorylation (STY):0.00	Y484	GLQNLLYDSPSPP	3074.27	4182.41	2667.45	283.265	2829.29	2730.6	Quantified	GO:0031175(BP:neuron projection development);GO:0005516(MF:calmodulin binding);GO:0008017(MF:microtubule binding);GO:0030507(MF:spectrin binding)				PF08683(Microtubule-binding calmodulin-regulated spectrin-associated);PF17095(Spectrin-binding region of Ca2+-Calmodulin);PF11971(CAMSAP CH domain)
A0A3Q0JD68	A0A3Q0JD68|A0A3Q0JD68_DIACI	S	AAADNVSSAGLQNLLYDSPS(+79.97)PPSPSITVEPTK	20	32	Patronin-like OS=Diaphorina citri OX=121845 GN=LOC103516486 PE=4 SV=1	Patronin-like	LOC103516486	60.91	3305.57	3.9	469	500	S20:Phosphorylation (STY):0.00	S488	LLYDSPSPPSPSI	1622.89	335.012	70.8044	225.258	751.669	77.7699	Quantified	GO:0031175(BP:neuron projection development);GO:0005516(MF:calmodulin binding);GO:0008017(MF:microtubule binding);GO:0030507(MF:spectrin binding)				PF08683(Microtubule-binding calmodulin-regulated spectrin-associated);PF17095(Spectrin-binding region of Ca2+-Calmodulin);PF11971(CAMSAP CH domain)
A0A3Q0JD68	A0A3Q0JD68|A0A3Q0JD68_DIACI	S	AAADNVSSAGLQNLLYDSPS(+79.97)PPSPSITVEPTKR	20	33	Patronin-like OS=Diaphorina citri OX=121845 GN=LOC103516486 PE=4 SV=1	Patronin-like	LOC103516486	43.96	3461.67	1	469	501	S20:Phosphorylation (STY):11.12	S488	LLYDSPSPPSPSI	1190.14	4182.41	817.862	1100	2829.29	2730.6	Quantified	GO:0031175(BP:neuron projection development);GO:0005516(MF:calmodulin binding);GO:0008017(MF:microtubule binding);GO:0030507(MF:spectrin binding)				PF08683(Microtubule-binding calmodulin-regulated spectrin-associated);PF17095(Spectrin-binding region of Ca2+-Calmodulin);PF11971(CAMSAP CH domain)
A0A3Q0JD68	A0A3Q0JD68|A0A3Q0JD68_DIACI	S	AAADNVSSAGLQNLLYDSPSPPS(+79.97)PSITVEPTK	23	32	Patronin-like OS=Diaphorina citri OX=121845 GN=LOC103516486 PE=4 SV=1	Patronin-like	LOC103516486	47.32	3305.57	1.7	469	500	S23:Phosphorylation (STY):7.32	S491	DSPSPPSPSITVE	1622.89	1285.63	1065.91	370.467	1000.23	388.502	Quantified	GO:0031175(BP:neuron projection development);GO:0005516(MF:calmodulin binding);GO:0008017(MF:microtubule binding);GO:0030507(MF:spectrin binding)				PF08683(Microtubule-binding calmodulin-regulated spectrin-associated);PF17095(Spectrin-binding region of Ca2+-Calmodulin);PF11971(CAMSAP CH domain)
A0A3Q0JD68	A0A3Q0JD68|A0A3Q0JD68_DIACI	S	AAADNVSSAGLQNLLYDSPSPPSPS(+79.97)ITVEPTK	25	32	Patronin-like OS=Diaphorina citri OX=121845 GN=LOC103516486 PE=4 SV=1	Patronin-like	LOC103516486	49.76	3305.57	1.2	469	500	S25:Phosphorylation (STY):0.00	S493	PSPPSPSITVEPT	702.945	1285.63	70.8044	225.258	751.669	388.502	Quantified	GO:0031175(BP:neuron projection development);GO:0005516(MF:calmodulin binding);GO:0008017(MF:microtubule binding);GO:0030507(MF:spectrin binding)				PF08683(Microtubule-binding calmodulin-regulated spectrin-associated);PF17095(Spectrin-binding region of Ca2+-Calmodulin);PF11971(CAMSAP CH domain)
A0A1S3DH24	A0A1S3DH24|A0A1S3DH24_DIACI	S	AAALLLENDHS(+79.97)PDVK	11	15	Ankyrin-3-like OS=Diaphorina citri OX=121845 GN=LOC103518522 PE=4 SV=1	Ankyrin-3-like	LOC103518522	62.24	1671.79	1.4	120	134		S130	LLENDHSPDVKSN	2853.48	3872.81	3475.93	3228.77	4266.23	3345.61	Quantified					PF12796(Ankyrin repeats (3 copies));PF13637(Ankyrin repeats (many copies))
A0A3Q0ILD9	A0A3Q0ILD9|A0A3Q0ILD9_DIACI:A0A1S3DPY7|A0A1S3DPY7_DIACI:A0A1S4E917|A0A1S4E917_DIACI:A0A3Q0JJC6|A0A3Q0JJC6_DIACI	S	AAAS(+79.97)VENLR	4	9	Uncharacterized protein LOC113466130 OS=Diaphorina citri OX=121845 GN=LOC113466130 PE=4 SV=1	Uncharacterized protein LOC113466130	LOC113466130	50.95	1009.46	-2.9	77	85		S80	GSRAAASVENLRA	3035.95	640.708	4764.39	301.442	884.209	1478.09	Quantified
A0A3Q0IX63	A0A3Q0IX63|A0A3Q0IX63_DIACI	S	AAASVLS(+79.97)PFDEQEEWAR	7	17	Ankyrin repeat and sterile alpha motif domain-containing protein 1B OS=Diaphorina citri OX=121845 GN=LOC103508666 PE=4 SV=1	Ankyrin repeat and sterile alpha motif domain-containing protein 1B	LOC103508666	29.2	1984.86	1.4	755	771	S7:Phosphorylation (STY):44.44	S761	AAASVLSPFDEQE	856.097	285.297	337.121	317.526	76.9934	165.225	Quantified					PF12796(Ankyrin repeats (3 copies));PF00536(SAM domain (Sterile alpha motif))
A0A1S4ESR1	A0A1S4ESR1|A0A1S4ESR1_DIACI	S	AADS(+79.97)S(+79.97)DEEEYDENNAQK	4	17	HIV Tat-specific factor 1 homolog isoform X1 OS=Diaphorina citri OX=121845 GN=LOC103524592 PE=3 SV=1	HIV Tat-specific factor 1 homolog isoform X1	LOC103524592	51.41	2073.67	3.3	182	198	S4:Phosphorylation (STY):47.38;S5:Phosphorylation (STY):54.46	S185	SDKAADSSDEEEY	589.954	276.647	198.937	352.129	249.127	274.833	Quantified	GO:0000398(BP:mRNA splicing, via spliceosome);GO:0003723(MF:RNA binding)				PF00076(RNA recognition motif. (a.k.a. RRM, RBD, or RNP domain))
A0A1S4ESR1	A0A1S4ESR1|A0A1S4ESR1_DIACI	S	AADS(+79.97)S(+79.97)DEEEYDENNAQK	5	17	HIV Tat-specific factor 1 homolog isoform X1 OS=Diaphorina citri OX=121845 GN=LOC103524592 PE=3 SV=1	HIV Tat-specific factor 1 homolog isoform X1	LOC103524592	51.41	2073.67	3.3	182	198	S4:Phosphorylation (STY):47.38;S5:Phosphorylation (STY):54.46	S186	DKAADSSDEEEYD	589.954	276.647	198.937	352.129	249.127	274.833	Quantified	GO:0000398(BP:mRNA splicing, via spliceosome);GO:0003723(MF:RNA binding)				PF00076(RNA recognition motif. (a.k.a. RRM, RBD, or RNP domain))
A0A1S3CZA5	A0A1S3CZA5|A0A1S3CZA5_DIACI	T	AADVDIT(+79.97)PVDGDSEDASR	7	18	Heat shock protein 83 OS=Diaphorina citri OX=121845 GN=LOC103508055 PE=3 SV=1	Heat shock protein 83	LOC103508055	55.99	1911.77	3.4	701	718	T7:Phosphorylation (STY):34.81	T707	AADVDITPVDGDS	324.62	1421.85	1329.31	1060.53	1566.39	991.988	Quantified	GO:0006457(BP:protein folding);GO:0005524(MF:ATP binding);GO:0051082(MF:unfolded protein binding)	K04079(NA)	ko04141(Protein processing in endoplasmic reticulum);ko04151(PI3K-Akt signaling pathway);ko04217(Necroptosis)		PF00183(Hsp90 protein);PF02518(Histidine kinase-, DNA gyrase B-, and HSP90-like ATPase)
A0A1S3CZA5	A0A1S3CZA5|A0A1S3CZA5_DIACI	S	AADVDITPVDGDS(+79.97)EDASR	13	18	Heat shock protein 83 OS=Diaphorina citri OX=121845 GN=LOC103508055 PE=3 SV=1	Heat shock protein 83	LOC103508055	57.96	1911.77	1.7	701	718	S13:Phosphorylation (STY):25.11	S713	TPVDGDSEDASRM	8413.98	9159	6701.73	1644.25	5013.6	4016.23	Quantified	GO:0006457(BP:protein folding);GO:0005524(MF:ATP binding);GO:0051082(MF:unfolded protein binding)	K04079(NA)	ko04141(Protein processing in endoplasmic reticulum);ko04151(PI3K-Akt signaling pathway);ko04217(Necroptosis)		PF00183(Hsp90 protein);PF02518(Histidine kinase-, DNA gyrase B-, and HSP90-like ATPase)
A0A1S3CZA5	A0A1S3CZA5|A0A1S3CZA5_DIACI	S	AADVDITPVDGDSEDAS(+79.97)R	17	18	Heat shock protein 83 OS=Diaphorina citri OX=121845 GN=LOC103508055 PE=3 SV=1	Heat shock protein 83	LOC103508055	50	1911.77	0.8	701	718	S17:Phosphorylation (STY):5.55	S717	GDSEDASRMEEVD	8413.98	9159	1716.52	1644.25	5013.6	4016.23	Quantified	GO:0006457(BP:protein folding);GO:0005524(MF:ATP binding);GO:0051082(MF:unfolded protein binding)	K04079(NA)	ko04141(Protein processing in endoplasmic reticulum);ko04151(PI3K-Akt signaling pathway);ko04217(Necroptosis)		PF00183(Hsp90 protein);PF02518(Histidine kinase-, DNA gyrase B-, and HSP90-like ATPase)
A0A3Q0JCM3	A0A3Q0JCM3|A0A3Q0JCM3_DIACI	S	AAEIS(+79.97)SILEER	5	11	ATP synthase subunit alpha, mitochondrial-like OS=Diaphorina citri OX=121845 GN=LOC108253615 PE=3 SV=1	ATP synthase subunit alpha, mitochondrial-like	LOC108253615	60.5	1296.6	-3.3	43	53	S5:Phosphorylation (STY):9.34	S47	SRAAEISSILEER	798.444	421.956	656.635	254.935	835.232	417.289	Quantified	GO:0015986(BP:ATP synthesis coupled proton transport);GO:0045261(CC:proton-transporting ATP synthase complex, catalytic core F(1));GO:0005524(MF:ATP binding);GO:0046933(MF:proton-transporting ATP synthase activity, rotational mechanism)	K02132(NA)	ko00190(Oxidative phosphorylation)		PF00306(ATP synthase alpha/beta chain, C terminal domain);PF00006(ATP synthase alpha/beta family, nucleotide-binding domain)
A0A3Q0JCM3	A0A3Q0JCM3|A0A3Q0JCM3_DIACI	S	AAEISS(+79.97)ILEER	6	11	ATP synthase subunit alpha, mitochondrial-like OS=Diaphorina citri OX=121845 GN=LOC108253615 PE=3 SV=1	ATP synthase subunit alpha, mitochondrial-like	LOC108253615	54.32	1296.6	-4	43	53	S6:Phosphorylation (STY):10.11	S48	RAAEISSILEERI	1368.72	283.838	750.536	1173.94	2224.93	1508.55	Quantified	GO:0015986(BP:ATP synthesis coupled proton transport);GO:0045261(CC:proton-transporting ATP synthase complex, catalytic core F(1));GO:0005524(MF:ATP binding);GO:0046933(MF:proton-transporting ATP synthase activity, rotational mechanism)	K02132(NA)	ko00190(Oxidative phosphorylation)		PF00306(ATP synthase alpha/beta chain, C terminal domain);PF00006(ATP synthase alpha/beta family, nucleotide-binding domain)
A0A3Q0J7P5	A0A3Q0J7P5|A0A3Q0J7P5_DIACI:A0A1S3DD98|A0A1S3DD98_DIACI:A0A1S3DCX8|A0A1S3DCX8_DIACI:A0A3Q0JLL3|A0A3Q0JLL3_DIACI:A0A3Q0JPP7|A0A3Q0JPP7_DIACI:A0A1S3DGP9|A0A1S3DGP9_DIACI	S	AAEVRS(+79.97)RR	6	8	Spectrin alpha chain-like OS=Diaphorina citri OX=121845 GN=LOC103516244 PE=4 SV=1	Spectrin alpha chain-like	LOC103516244	25.74	1023.5	-7.6	1814	1821		S1819	KAAEVRSRRSDLK	432.433	398.648	5853.09	853.423	7865.15	125.46	Quantified	GO:0005509(MF:calcium ion binding)	K06114(NA)	ko04210(Apoptosis)		PF13499(EF-hand domain pair);PF08726(Ca2+ insensitive EF hand);PF00435(Spectrin repeat)
A0A1S4EG41	A0A1S4EG41|A0A1S4EG41_DIACI	S	AAFDDAIAELDTLS(+79.97)EDSYK	14	19	LOW QUALITY PROTEIN: 14-3-3 protein epsilon OS=Diaphorina citri OX=121845 GN=LOC103512747 PE=3 SV=1	LOW QUALITY PROTEIN: 14-3-3 protein epsilon	LOC103512747	87.7	2152.91	2.6	195	213	S14:Phosphorylation (STY):26.52	S208	AELDTLSEDSYKD	118152	175771	254582	162079	187795	97725.8	Quantified	GO:0019904(MF:protein domain specific binding)	K06630(NA)	ko04011(MAPK signaling pathway - yeast);ko04110(Cell cycle);ko04114(Oocyte meiosis);ko04151(PI3K-Akt signaling pathway);ko04390(Hippo signaling pathway);ko04391(Hippo signaling pathway - fly)		PF00244(14-3-3 protein)
A0A1S4EG41	A0A1S4EG41|A0A1S4EG41_DIACI	S	AAFDDAIAELDTLSEDS(+79.97)YK	17	19	LOW QUALITY PROTEIN: 14-3-3 protein epsilon OS=Diaphorina citri OX=121845 GN=LOC103512747 PE=3 SV=1	LOW QUALITY PROTEIN: 14-3-3 protein epsilon	LOC103512747	63.3	2152.91	2.6	195	213	S17:Phosphorylation (STY):0.00	S211	DTLSEDSYKDSTL					96.0369	48.0874	Quantified	GO:0019904(MF:protein domain specific binding)	K06630(NA)	ko04011(MAPK signaling pathway - yeast);ko04110(Cell cycle);ko04114(Oocyte meiosis);ko04151(PI3K-Akt signaling pathway);ko04390(Hippo signaling pathway);ko04391(Hippo signaling pathway - fly)		PF00244(14-3-3 protein)
A0A1S4EG41	A0A1S4EG41|A0A1S4EG41_DIACI	S	AAFDDAIAELDTLSEDSYKDS(+79.97)TLIM(+15.99)QLLR	21	29	LOW QUALITY PROTEIN: 14-3-3 protein epsilon OS=Diaphorina citri OX=121845 GN=LOC103512747 PE=3 SV=1	LOW QUALITY PROTEIN: 14-3-3 protein epsilon	LOC103512747	32.03	3339.55	-0.5	195	223	S21:Phosphorylation (STY):0.00;M25:Oxidation (M):1000.00	S215	EDSYKDSTLIMQL		347.506					Identified	GO:0019904(MF:protein domain specific binding)	K06630(NA)	ko04011(MAPK signaling pathway - yeast);ko04110(Cell cycle);ko04114(Oocyte meiosis);ko04151(PI3K-Akt signaling pathway);ko04390(Hippo signaling pathway);ko04391(Hippo signaling pathway - fly)		PF00244(14-3-3 protein)
A0A1S3DIW1	A0A1S3DIW1|A0A1S3DIW1_DIACI	S	AAFES(+79.97)LKR	5	8	Bestrophin homolog OS=Diaphorina citri OX=121845 GN=LOC103519462 PE=3 SV=1	Bestrophin homolog	LOC103519462	32.47	1000.47	-3.3	626	633		S630	AKAAFESLKRSRQ	289.711	221.637	448.717	139.421	306.637	208.676	Quantified	GO:0034707(CC:chloride channel complex);GO:0005886(CC:plasma membrane);GO:0005254(MF:chloride channel activity)			Cell membrane;Multi-pass membrane protein;Membrane	PF01062(Bestrophin, RFP-TM, chloride channel)
A0A3Q0JMS1	A0A3Q0JMS1|A0A3Q0JMS1_DIACI	T	AAGLELAEAEATVQYHT(+79.97)R	17	18	Uncharacterized protein LOC103522618 OS=Diaphorina citri OX=121845 GN=LOC103522618 PE=4 SV=1	Uncharacterized protein LOC103522618	LOC103522618	30.65	2008.93	10.7	134	151	T17:Phosphorylation (STY):0.00	T150	ATVQYHTRNVTSV	2068.58	1937.67	2412.22	2595.63	1750.08	1443.76	Quantified
A0A3Q0JP13	A0A3Q0JP13|A0A3Q0JP13_DIACI	S	AAHLGLTNS(+79.97)QIK	9	12	Dynein intermediate chain 2, axonemal-like OS=Diaphorina citri OX=121845 GN=LOC103522902 PE=4 SV=1	Dynein intermediate chain 2, axonemal-like	LOC103522902	73.34	1331.66	-1.9	396	407	S9:Phosphorylation (STY):4.64	S404	HLGLTNSQIKVKV	8221.99	9990.71	12377.2	5044.31	5425.73	4076.47	Quantified	GO:0044464(CC:cell part)	K11143(NA)	ko04814(Motor proteins)
A0A1S3CYV6	A0A1S3CYV6|A0A1S3CYV6_DIACI:A0A3Q0IVQ9|A0A3Q0IVQ9_DIACI	S	AAIDS(+79.97)FDEELK	5	11	Uncharacterized protein LOC103507921 isoform X1 OS=Diaphorina citri OX=121845 GN=LOC103507921 PE=4 SV=1	Uncharacterized protein LOC103507921 isoform X1	LOC103507921	57.18	1316.55	-2.9	74	84		S78	KKAAIDSFDEELK	7408.29	2385.37	3258.69	10287.3	9403.35	6555.21	Quantified
A0A1S3CYV6	A0A1S3CYV6|A0A1S3CYV6_DIACI:A0A3Q0IVQ9|A0A3Q0IVQ9_DIACI	S	AAIDS(+79.97)FDEELKK	5	12	Uncharacterized protein LOC103507921 isoform X1 OS=Diaphorina citri OX=121845 GN=LOC103507921 PE=4 SV=1	Uncharacterized protein LOC103507921 isoform X1	LOC103507921	62.87	1444.65	-1	74	85		S78	KKAAIDSFDEELK	7992.46	9832.35	6500.9	12902.4	12744.8	8440.17	Quantified
A0A3Q0IN52	A0A3Q0IN52|A0A3Q0IN52_DIACI	T	AAIDTT(+79.97)SMHR	6	10	LOW QUALITY PROTEIN: titin OS=Diaphorina citri OX=121845 GN=LOC103524768 PE=4 SV=1	LOW QUALITY PROTEIN: titin	LOC103524768	29.97	1181.49	0.3	1133	1142	T6:Phosphorylation (STY):0.00	T1138	RAAIDTTSMHRGT	1147.71	1313.11	1385.79	1559.75	477.136	902.621	Quantified					PF07679(Immunoglobulin I-set domain);PF06582(Repeat of unknown function (DUF1136))
A0A1S4EGW3	A0A1S4EGW3|A0A1S4EGW3_DIACI	S	AAIS(+79.97)EDEFEGGLC(+57.02)	4	13	Gamma-soluble NSF attachment protein-like isoform X1 OS=Diaphorina citri OX=121845 GN=LOC103513818 PE=3 SV=1	Gamma-soluble NSF attachment protein-like isoform X1	LOC103513818	51.91	1476.55	-0.8	310	322	C13:Carbamidomethylation:1000.00	S313	STKAAISEDEFEG	7109.68	2185.85	2431.97	300.837	5938.02	3846.8	Quantified	GO:0006886(BP:intracellular protein transport)				PF14938(Soluble NSF attachment protein, SNAP)
A0A3Q0IU94	A0A3Q0IU94|A0A3Q0IU94_DIACI	T	AALAAANGEELQEVT(+79.97)DGEEEEDEEDR	15	26	tRNA pseudouridine synthase A OS=Diaphorina citri OX=121845 GN=LOC103509769 PE=3 SV=1	tRNA pseudouridine synthase A	LOC103509769	46.33	2898.16	-1.4	390	415		T404	EELQEVTDGEEEE	505.717	1230.15	982.465	1165.65	968.538	397.013	Quantified	GO:0031119(BP:tRNA pseudouridine synthesis);GO:0009982(MF:pseudouridine synthase activity);GO:0003723(MF:RNA binding)				PF01416(tRNA pseudouridine synthase)
A0A3Q0IU94	A0A3Q0IU94|A0A3Q0IU94_DIACI	T	AALAAANGEELQEVT(+79.97)DGEEEEDEEDRGGVR	15	30	tRNA pseudouridine synthase A OS=Diaphorina citri OX=121845 GN=LOC103509769 PE=3 SV=1	tRNA pseudouridine synthase A	LOC103509769	50.92	3267.37	-5.8	390	419		T404	EELQEVTDGEEEE	1404.81	1481.14	1641.82	535.219	1481.06	1770.32	Quantified	GO:0031119(BP:tRNA pseudouridine synthesis);GO:0009982(MF:pseudouridine synthase activity);GO:0003723(MF:RNA binding)				PF01416(tRNA pseudouridine synthase)
A0A3Q0JEQ9	A0A3Q0JEQ9|A0A3Q0JEQ9_DIACI	S	AALS(+79.97)FGS(+79.97)PSNSK	4	12	Calcium/calmodulin-dependent protein kinase type II subunit delta-like OS=Diaphorina citri OX=121845 GN=LOC113471771 PE=4 SV=1	Calcium/calmodulin-dependent protein kinase type II subunit delta-like	LOC113471771	36.94	1324.51	-1.6	25	36	S4:Phosphorylation (STY):23.70;S7:Phosphorylation (STY):14.04	S28	ALKAALSFGSPSN	652.662	569.754	851.251	1183.18	228.322	1309.19	Quantified	GO:0005516(MF:calmodulin binding);GO:0004683(MF:calmodulin-dependent protein kinase activity)				PF08332(Calcium/calmodulin dependent protein kinase II association domain)
A0A3Q0JEQ9	A0A3Q0JEQ9|A0A3Q0JEQ9_DIACI	S	AALS(+79.97)FGS(+79.97)PSNSK	7	12	Calcium/calmodulin-dependent protein kinase type II subunit delta-like OS=Diaphorina citri OX=121845 GN=LOC113471771 PE=4 SV=1	Calcium/calmodulin-dependent protein kinase type II subunit delta-like	LOC113471771	36.94	1324.51	-1.6	25	36	S4:Phosphorylation (STY):23.70;S7:Phosphorylation (STY):14.04	S31	AALSFGSPSNSKS	652.662	569.754	851.251	1183.18	228.322	1309.19	Quantified	GO:0005516(MF:calmodulin binding);GO:0004683(MF:calmodulin-dependent protein kinase activity)				PF08332(Calcium/calmodulin dependent protein kinase II association domain)
A0A3Q0JEQ9	A0A3Q0JEQ9|A0A3Q0JEQ9_DIACI	S	AALS(+79.97)FGSPSNSK	4	12	Calcium/calmodulin-dependent protein kinase type II subunit delta-like OS=Diaphorina citri OX=121845 GN=LOC113471771 PE=4 SV=1	Calcium/calmodulin-dependent protein kinase type II subunit delta-like	LOC113471771	66.51	1244.54	-1.3	25	36	S4:Phosphorylation (STY):26.52	S28	ALKAALSFGSPSN	11245.5	10488.3	11053.1	6010.88	4793.08	5776.87	Quantified	GO:0005516(MF:calmodulin binding);GO:0004683(MF:calmodulin-dependent protein kinase activity)				PF08332(Calcium/calmodulin dependent protein kinase II association domain)
A0A3Q0JEQ9	A0A3Q0JEQ9|A0A3Q0JEQ9_DIACI	S	AALSFGS(+79.97)PSNSK	7	12	Calcium/calmodulin-dependent protein kinase type II subunit delta-like OS=Diaphorina citri OX=121845 GN=LOC113471771 PE=4 SV=1	Calcium/calmodulin-dependent protein kinase type II subunit delta-like	LOC113471771	51.74	1244.54	-2.5	25	36	S7:Phosphorylation (STY):26.31	S31	AALSFGSPSNSKS	1665.59	2004.99	1442.26	1408.07	4440.22	3982.44	Quantified	GO:0005516(MF:calmodulin binding);GO:0004683(MF:calmodulin-dependent protein kinase activity)				PF08332(Calcium/calmodulin dependent protein kinase II association domain)
A0A3Q0JEQ9	A0A3Q0JEQ9|A0A3Q0JEQ9_DIACI	S	AALSFGSPSNS(+79.97)K	11	12	Calcium/calmodulin-dependent protein kinase type II subunit delta-like OS=Diaphorina citri OX=121845 GN=LOC113471771 PE=4 SV=1	Calcium/calmodulin-dependent protein kinase type II subunit delta-like	LOC113471771	31.03	1244.54	-3.7	25	36	S11:Phosphorylation (STY):0.00	S35	FGSPSNSKSGPTT	1665.59	606.327	1442.26	1408.07	4440.22	2709.63	Quantified	GO:0005516(MF:calmodulin binding);GO:0004683(MF:calmodulin-dependent protein kinase activity)				PF08332(Calcium/calmodulin dependent protein kinase II association domain)
A0A3Q0J0I9	A0A3Q0J0I9|A0A3Q0J0I9_DIACI	S	AAPAPS(+79.97)PTPVPSQK	6	14	Dihydrolipoamide acetyltransferase component of pyruvate dehydrogenase complex OS=Diaphorina citri OX=121845 GN=LOC103512808 PE=3 SV=1	Dihydrolipoamide acetyltransferase component of pyruvate dehydrogenase complex	LOC103512808	63.36	1426.69	0.1	190	203	S6:Phosphorylation (STY):14.63	S195	KAAPAPSPTPVPS	6434.17	4190.36	8097.43	320.226	3426.52	3899.76	Quantified	GO:0050909(BP:sensory perception of taste);GO:0016021(CC:integral component of membrane);GO:0016746(MF:transferase activity, transferring acyl groups)	K00627(NA)	ko00010(Glycolysis / Gluconeogenesis);ko00020(Citrate cycle (TCA cycle));ko00620(Pyruvate metabolism);ko00785(Lipoic acid metabolism)	Cell membrane;Multi-pass membrane protein	PF08395(7tm Chemosensory receptor);PF02817(e3 binding domain);PF00198(2-oxoacid dehydrogenases acyltransferase (catalytic domain));PF00364(Biotin-requiring enzyme)
A0A3Q0IT74	A0A3Q0IT74|A0A3Q0IT74_DIACI	S	AAPTTTPS(+79.97)SPQQSVLDTLIQR	8	21	Coiled-coil and C2 domain-containing protein 1-like OS=Diaphorina citri OX=121845 GN=LOC103507101 PE=3 SV=1	Coiled-coil and C2 domain-containing protein 1-like	LOC103507101	45.94	2290.12	-4.6	74	94	S8:Phosphorylation (STY):0.00	S81	APTTTPSSPQQSV	7566.78	6754.44	3439.74	9734.64	2939.88	5997.05	Quantified	GO:0001227(MF:DNA-binding transcription repressor activity, RNA polymerase II-specific)				PF00168(C2 domain)
A0A3Q0IT74	A0A3Q0IT74|A0A3Q0IT74_DIACI	S	AAPTTTPSS(+79.97)PQQSVLDTLIQR	9	21	Coiled-coil and C2 domain-containing protein 1-like OS=Diaphorina citri OX=121845 GN=LOC103507101 PE=3 SV=1	Coiled-coil and C2 domain-containing protein 1-like	LOC103507101	54.42	2290.12	-15.1	74	94	S9:Phosphorylation (STY):0.00	S82	PTTTPSSPQQSVL	7951.72	6822.83	10188.8	9859.38	3185.19	1963.08	Quantified	GO:0001227(MF:DNA-binding transcription repressor activity, RNA polymerase II-specific)				PF00168(C2 domain)
A0A3Q0IT74	A0A3Q0IT74|A0A3Q0IT74_DIACI	S	AAPTTTPSSPQQS(+79.97)VLDTLIQR	13	21	Coiled-coil and C2 domain-containing protein 1-like OS=Diaphorina citri OX=121845 GN=LOC103507101 PE=3 SV=1	Coiled-coil and C2 domain-containing protein 1-like	LOC103507101	44.47	2290.12	1.1	74	94	S13:Phosphorylation (STY):0.00	S86	PSSPQQSVLDTLI	282.458	873.089	2831.32	1077.33	1468.98	840.926	Quantified	GO:0001227(MF:DNA-binding transcription repressor activity, RNA polymerase II-specific)				PF00168(C2 domain)
A0A3Q0J5M2	A0A3Q0J5M2|A0A3Q0J5M2_DIACI	S	AAQPLS(+79.97)PQQQDQQQTK	6	16	Uncharacterized protein LOC113469036 OS=Diaphorina citri OX=121845 GN=LOC113469036 PE=4 SV=1	Uncharacterized protein LOC113469036	LOC113469036	39.39	1874.85	-1.6	68	83	S6:Phosphorylation (STY):9.99	S73	KAAQPLSPQQQDQ	530.215	258.739	692.008	216.425	265.659	75.079	Quantified
A0A3Q0JDW0	A0A3Q0JDW0|A0A3Q0JDW0_DIACI	T	AAQVVEET(+79.97)DDERDDIDDEIIVTHL	8	24	UNC93-like protein OS=Diaphorina citri OX=121845 GN=LOC103519288 PE=3 SV=1	UNC93-like protein	LOC103519288	44.7	2819.24	-4	220	243	T8:Phosphorylation (STY):50.91	T227	AQVVEETDDERDD	343.35	419.86	387.509	160.032	216.493	169.12	Quantified	GO:0016021(CC:integral component of membrane);GO:0022857(MF:transmembrane transporter activity)			Membrane;Multi-pass membrane protein	PF07690(Major Facilitator Superfamily)
A0A3Q0JFH3	A0A3Q0JFH3|A0A3Q0JFH3_DIACI	S	AAS(+79.97)DESLVNDVQEQR	3	15	Uncharacterized protein LOC103520224 OS=Diaphorina citri OX=121845 GN=LOC103520224 PE=4 SV=1	Uncharacterized protein LOC103520224	LOC103520224	64.17	1739.74	5	213	227	S3:Phosphorylation (STY):16.66	S215	EAMRAASDESLVN	1046.61	1565.88	138.73	456.54	784.758	166.951	Quantified					PF02995(Protein of unknown function (DUF229))
A0A1S4EA75	A0A1S4EA75|A0A1S4EA75_DIACI:A0A3Q0IQZ0|A0A3Q0IQZ0_DIACI	S	AAS(+79.97)FEDDEDGHLIYK	3	15	Probable serine/threonine-protein kinase dyrk2 isoform X3 OS=Diaphorina citri OX=121845 GN=LOC103522754 PE=4 SV=1	Probable serine/threonine-protein kinase dyrk2 isoform X3	LOC103522754	74.39	1788.72	3.8	386	400	S3:Phosphorylation (STY):173.67	S388	FSSRAASFEDDED	32820.8	49827.1	64810.9	69563.7	50087.9	39371.2	Quantified	GO:0005524(MF:ATP binding);GO:0004672(MF:protein kinase activity)				PF00069(Protein kinase domain)
A0A3Q0J6P0	A0A3Q0J6P0|A0A3Q0J6P0_DIACI	S	AAS(+79.97)LGDLSR	3	9	Uncharacterized protein LOC108253231 OS=Diaphorina citri OX=121845 GN=LOC108253231 PE=4 SV=1	Uncharacterized protein LOC108253231	LOC108253231	41.8	968.433	-1.1	376	384	S3:Phosphorylation (STY):44.27	S378	SDRKAASLGDLSR	2950.31	531.545	798.701	2673.76	2034.12	2431.61	Quantified
A0A3Q0JK09	A0A3Q0JK09|A0A3Q0JK09_DIACI	S	AASNSSQLS(+79.97)DTPENEVIDLTGGR	9	23	Histone deacetylase 4-like OS=Diaphorina citri OX=121845 GN=LOC103523301 PE=3 SV=1	Histone deacetylase 4-like	LOC103523301	46.5	2440.08	7.5	285	307	S9:Phosphorylation (STY):0.00	S293	SNSSQLSDTPENE	1017.28	1405.97	1828.02	350.632	911.973	473.548	Quantified	GO:0016787(MF:hydrolase activity)	K11406(NA)	ko04371(Apelin signaling pathway)		PF00850(Histone deacetylase domain)
A0A3Q0JK09	A0A3Q0JK09|A0A3Q0JK09_DIACI	T	AASNSSQLSDT(+79.97)PENEVIDLTGGR	11	23	Histone deacetylase 4-like OS=Diaphorina citri OX=121845 GN=LOC103523301 PE=3 SV=1	Histone deacetylase 4-like	LOC103523301	37.78	2440.08	-4.3	285	307	T11:Phosphorylation (STY):0.00	T295	SSQLSDTPENEVI	1017.28	1405.97	676.459	387.048	911.973	473.548	Quantified	GO:0016787(MF:hydrolase activity)	K11406(NA)	ko04371(Apelin signaling pathway)		PF00850(Histone deacetylase domain)
A0A1S3D197	A0A1S3D197|A0A1S3D197_DIACI	T	AAVAESLQNGDT(+79.97)EEEESK	12	18	Histone-lysine N-methyltransferase NSD3 OS=Diaphorina citri OX=121845 GN=LOC103509368 PE=4 SV=1	Histone-lysine N-methyltransferase NSD3	LOC103509368	47.35	1985.81	5.1	168	185	T12:Phosphorylation (STY):39.44	T179	SLQNGDTEEEESK	2632.16	1204.86	643.664	764.222	610.859	712.295	Quantified	GO:0032259(BP:methylation);GO:0008168(MF:methyltransferase activity)				PF00855(PWWP domain)
A0A1S3D197	A0A1S3D197|A0A1S3D197_DIACI	S	AAVAESLQNGDTEEEES(+79.97)K	17	18	Histone-lysine N-methyltransferase NSD3 OS=Diaphorina citri OX=121845 GN=LOC103509368 PE=4 SV=1	Histone-lysine N-methyltransferase NSD3	LOC103509368	42.55	1985.81	-10.4	168	185	S17:Phosphorylation (STY):24.47	S184	DTEEEESKSAKEV	498.249	885.671	535.764	503.064	305.636	221.466	Quantified	GO:0032259(BP:methylation);GO:0008168(MF:methyltransferase activity)				PF00855(PWWP domain)
A0A3Q0IVK8	A0A3Q0IVK8|A0A3Q0IVK8_DIACI	T	AAVNNSATANATAPNT(+79.97)PTSEAPGK	16	24	LOW QUALITY PROTEIN: UHRF1-binding protein 1-like OS=Diaphorina citri OX=121845 GN=LOC103510461 PE=4 SV=1	LOW QUALITY PROTEIN: UHRF1-binding protein 1-like	LOC103510461	54.55	2334.05	-1.4	411	434	T16:Phosphorylation (STY):22.85	T426	NATAPNTPTSEAP	1271.04	286.668	662.898	1306.1	358.837	779.729	Quantified					PF12624(N-terminal region of Chorein or VPS13)
A0A3Q0IVK8	A0A3Q0IVK8|A0A3Q0IVK8_DIACI	S	AAVNNSATANATAPNTPTS(+79.97)EAPGK	19	24	LOW QUALITY PROTEIN: UHRF1-binding protein 1-like OS=Diaphorina citri OX=121845 GN=LOC103510461 PE=4 SV=1	LOW QUALITY PROTEIN: UHRF1-binding protein 1-like	LOC103510461	34.32	2334.05	-5.6	411	434	S19:Phosphorylation (STY):0.00	S429	APNTPTSEAPGKL	1271.04	615.342	662.898	567.856	211.058	392.107	Quantified					PF12624(N-terminal region of Chorein or VPS13)
A0A1S3DR68	A0A1S3DR68|A0A1S3DR68_DIACI:A0A3Q0JGQ6|A0A3Q0JGQ6_DIACI:A0A1S3DSX7|A0A1S3DSX7_DIACI	S	AAVPS(+79.97)GASTGIYEALELR	5	18	Alpha-enolase-like OS=Diaphorina citri OX=121845 GN=LOC103523285 PE=4 SV=2	Alpha-enolase-like	LOC103523285	33.56	1883.9	0.5	33	50	S5:Phosphorylation (STY):19.16	S37	FRAAVPSGASTGI	629.271	1216.77	69.8982	893.482	707.443	517.233	Quantified	GO:0006096(BP:glycolytic process);GO:0000015(CC:phosphopyruvate hydratase complex);GO:0000287(MF:magnesium ion binding);GO:0004634(MF:phosphopyruvate hydratase activity)				PF03952(Enolase, N-terminal domain)
A0A1S3DR68	A0A1S3DR68|A0A1S3DR68_DIACI:A0A3Q0JGQ6|A0A3Q0JGQ6_DIACI:A0A1S3DSX7|A0A1S3DSX7_DIACI	S	AAVPSGAS(+79.97)TGIYEALELR	8	18	Alpha-enolase-like OS=Diaphorina citri OX=121845 GN=LOC103523285 PE=4 SV=2	Alpha-enolase-like	LOC103523285	65.22	1883.9	3	33	50	S8:Phosphorylation (STY):0.00	S40	AVPSGASTGIYEA	18322.1	33764.6	23098.9	589.103	11625.4	3278.39	Quantified	GO:0006096(BP:glycolytic process);GO:0000015(CC:phosphopyruvate hydratase complex);GO:0000287(MF:magnesium ion binding);GO:0004634(MF:phosphopyruvate hydratase activity)				PF03952(Enolase, N-terminal domain)
A0A1S3DR68	A0A1S3DR68|A0A1S3DR68_DIACI:A0A3Q0JGQ6|A0A3Q0JGQ6_DIACI:A0A1S3DSX7|A0A1S3DSX7_DIACI	T	AAVPSGAST(+79.97)GIYEALELR	9	18	Alpha-enolase-like OS=Diaphorina citri OX=121845 GN=LOC103523285 PE=4 SV=2	Alpha-enolase-like	LOC103523285	50.9	1883.9	2.1	33	50	T9:Phosphorylation (STY):9.34	T41	VPSGASTGIYEAL	18322.1	33764.6	23098.9	325.114	11625.4	3278.39	Quantified	GO:0006096(BP:glycolytic process);GO:0000015(CC:phosphopyruvate hydratase complex);GO:0000287(MF:magnesium ion binding);GO:0004634(MF:phosphopyruvate hydratase activity)				PF03952(Enolase, N-terminal domain)
A0A1S3DR68	A0A1S3DR68|A0A1S3DR68_DIACI:A0A3Q0JGQ6|A0A3Q0JGQ6_DIACI:A0A1S3DSX7|A0A1S3DSX7_DIACI	Y	AAVPSGASTGIY(+79.97)EALELR	12	18	Alpha-enolase-like OS=Diaphorina citri OX=121845 GN=LOC103523285 PE=4 SV=2	Alpha-enolase-like	LOC103523285	57.02	1883.9	4.1	33	50	Y12:Phosphorylation (STY):35.82	Y44	GASTGIYEALELR	1472.74	2356.98	1639.95	1594.81	2927.92	1200.26	Quantified	GO:0006096(BP:glycolytic process);GO:0000015(CC:phosphopyruvate hydratase complex);GO:0000287(MF:magnesium ion binding);GO:0004634(MF:phosphopyruvate hydratase activity)				PF03952(Enolase, N-terminal domain)
A0A3Q0J4R3	A0A3Q0J4R3|A0A3Q0J4R3_DIACI:A0A1S3D6W1|A0A1S3D6W1_DIACI	T	AC(+57.02)IVPANITAT(+79.97)SVPDLK	11	17	Twitchin-like OS=Diaphorina citri OX=121845 GN=LOC103512723 PE=4 SV=1	Twitchin-like	LOC103512723	51.4	1848.91	6.2	474	490	C2:Carbamidomethylation:1000.00;T11:Phosphorylation (STY):0.00	T484	PANITATSVPDLK	630.596	1173.64	907.337	1131.43	603.001	628.94	Quantified					PF00041(Fibronectin type III domain);PF07679(Immunoglobulin I-set domain)
A0A3Q0J4R3	A0A3Q0J4R3|A0A3Q0J4R3_DIACI:A0A1S3D6W1|A0A1S3D6W1_DIACI	S	AC(+57.02)IVPANITATS(+79.97)VPDLK	12	17	Twitchin-like OS=Diaphorina citri OX=121845 GN=LOC103512723 PE=4 SV=1	Twitchin-like	LOC103512723	62.94	1848.91	0.7	474	490	C2:Carbamidomethylation:1000.00;S12:Phosphorylation (STY):17.01	S485	ANITATSVPDLKE	4680.7	5116.97	3750.77	2613.12	3958.37	1871.59	Quantified					PF00041(Fibronectin type III domain);PF07679(Immunoglobulin I-set domain)
A0A3Q0JK34	A0A3Q0JK34|A0A3Q0JK34_DIACI	S	ADADKEES(+79.97)DFEDEEEIVPEPEEVPEK	8	26	LOW QUALITY PROTEIN: uncharacterized protein LOC103520694 OS=Diaphorina citri OX=121845 GN=LOC103520694 PE=4 SV=1	LOW QUALITY PROTEIN: uncharacterized protein LOC103520694	LOC103520694	80.42	3083.25	0.4	955	980		S962	DADKEESDFEDEE	25803.8	33862.4	34473.3	64330.9	34871.1	39759.3	Quantified	GO:0016021(CC:integral component of membrane)
A0A3Q0IXP7	A0A3Q0IXP7|A0A3Q0IXP7_DIACI	S	ADALQQGAS(+79.97)QFEQQAGK	9	17	Vesicle-associated membrane protein 2 OS=Diaphorina citri OX=121845 GN=LOC103508917 PE=4 SV=1	Vesicle-associated membrane protein 2	LOC103508917	54.64	1855.81	3	68	84		S76	ALQQGASQFEQQA	1964.99	2277.59	1242.89	487.475	621.27	446.406	Quantified	GO:0016192(BP:vesicle-mediated transport);GO:0016021(CC:integral component of membrane)	K13504(NA)	ko04130(SNARE interactions in vesicular transport)		PF00957(Synaptobrevin)
A0A3Q0JFN1	A0A3Q0JFN1|A0A3Q0JFN1_DIACI:A0A1S3DJC1|A0A1S3DJC1_DIACI	T	ADDGT(+79.97)PFVELLK	5	12	fructose-bisphosphate aldolase OS=Diaphorina citri OX=121845 GN=LOC103518161 PE=3 SV=1	fructose-bisphosphate aldolase	LOC103518161	26.77	1383.63	-3.5	88	99		T92	QKADDGTPFVELL	4632.84	3491.46	218.177	1346.78	2605.86	1379.78	Quantified	GO:0006096(BP:glycolytic process);GO:0004332(MF:fructose-bisphosphate aldolase activity)	K01623(NA)	ko00010(Glycolysis / Gluconeogenesis);ko00030(Pentose phosphate pathway);ko00051(Fructose and mannose metabolism);ko00680(Methane metabolism);ko00710(Carbon fixation in photosynthetic organisms);ko04066(HIF-1 signaling pathway)		PF00274(Fructose-bisphosphate aldolase class-I)
A0A3Q0J932	A0A3Q0J932|A0A3Q0J932_DIACI:A0A3Q0J4P0|A0A3Q0J4P0_DIACI	S	ADDSFTDFHLSS(+79.97)PK	12	14	PHD finger protein rhinoceros-like isoform X1 OS=Diaphorina citri OX=121845 GN=LOC103514785 PE=4 SV=1	PHD finger protein rhinoceros-like isoform X1	LOC103514785	65.33	1645.67	1.3	1067	1080	S12:Phosphorylation (STY):12.28	S1078	TDFHLSSPKNVGS	445.156	589.745	249.472	560.812	329.182	179.888	Quantified	GO:0046872(MF:metal ion binding)				PF13832(PHD-zinc-finger like domain);PF13831(PHD-finger)
A0A3Q0J6F6	A0A3Q0J6F6|A0A3Q0J6F6_DIACI	S	ADFSDS(+79.97)LNK	6	9	Dynactin subunit 2 OS=Diaphorina citri OX=121845 GN=LOC103515576 PE=3 SV=1	Dynactin subunit 2	LOC103515576	28.38	1075.42	0.3	60	68	S6:Phosphorylation (STY):9.40	S65	RADFSDSLNKLHK	183.118		184.414	254.83	216.678	263.982	Quantified	GO:0007017(BP:microtubule-based process);GO:0005869(CC:dynactin complex)	K10424(NA)	ko04814(Motor proteins)		PF04912(Dynamitin)
A0A3Q0JIK9	A0A3Q0JIK9|A0A3Q0JIK9_DIACI	T	ADGPAPETPDLT(+79.97)PR	12	14	Protein NASP homolog OS=Diaphorina citri OX=121845 GN=LOC103519813 PE=4 SV=1	Protein NASP homolog	LOC103519813	56.74	1515.66	-5.2	179	192	T12:Phosphorylation (STY):26.57	T190	PETPDLTPRKAEA	838.391	532.996	778.201	2622.72	840.295	354.795	Quantified					PF10516(SHNi-TPR)
A0A3Q0IPJ2	A0A3Q0IPJ2|A0A3Q0IPJ2_DIACI	S	ADGRDS(+79.97)ADEDEGLDSR	6	16	LOW QUALITY PROTEIN: obscurin-like OS=Diaphorina citri OX=121845 GN=LOC103507575 PE=3 SV=1	LOW QUALITY PROTEIN: obscurin-like	LOC103507575	59.6	1786.66	-2.2	3192	3207	S6:Phosphorylation (STY):77.76	S3197	KADGRDSADEDEG	56.4207		1659.08	2063.85	4945.33	568.616	Quantified	GO:0005524(MF:ATP binding);GO:0005085(MF:guanyl-nucleotide exchange factor activity);GO:0004672(MF:protein kinase activity)				PF00621(RhoGEF domain);PF00069(Protein kinase domain);PF00041(Fibronectin type III domain);PF07679(Immunoglobulin I-set domain)
A0A1S3CTE9	A0A1S3CTE9|A0A1S3CTE9_DIACI	S	ADIDGLS(+79.97)DIS(+79.97)DKS(+79.97)DPFTDNFDQIGTK	7	26	Transcriptional regulator ATRX-like OS=Diaphorina citri OX=121845 GN=LOC103504893 PE=4 SV=1	Transcriptional regulator ATRX-like	LOC103504893	43.01	3053.19	-1.2	691	716	S7:Phosphorylation (STY):12.23;S10:Phosphorylation (STY):6.08;S13:Phosphorylation (STY):8.26	S697	ADIDGLSDISDKS	3691.71	301.552	2319.03	175.032	3464.71	2787.07	Quantified	GO:0046872(MF:metal ion binding)			Nucleus
A0A1S3CTE9	A0A1S3CTE9|A0A1S3CTE9_DIACI	S	ADIDGLS(+79.97)DIS(+79.97)DKS(+79.97)DPFTDNFDQIGTK	10	26	Transcriptional regulator ATRX-like OS=Diaphorina citri OX=121845 GN=LOC103504893 PE=4 SV=1	Transcriptional regulator ATRX-like	LOC103504893	43.01	3053.19	-1.2	691	716	S7:Phosphorylation (STY):12.23;S10:Phosphorylation (STY):6.08;S13:Phosphorylation (STY):8.26	S700	DGLSDISDKSDPF	3691.71	301.552	2319.03	175.032	3464.71	2787.07	Quantified	GO:0046872(MF:metal ion binding)			Nucleus
A0A1S3CTE9	A0A1S3CTE9|A0A1S3CTE9_DIACI	S	ADIDGLS(+79.97)DIS(+79.97)DKS(+79.97)DPFTDNFDQIGTK	13	26	Transcriptional regulator ATRX-like OS=Diaphorina citri OX=121845 GN=LOC103504893 PE=4 SV=1	Transcriptional regulator ATRX-like	LOC103504893	43.01	3053.19	-1.2	691	716	S7:Phosphorylation (STY):12.23;S10:Phosphorylation (STY):6.08;S13:Phosphorylation (STY):8.26	S703	SDISDKSDPFTDN	3691.71	301.552	2319.03	175.032	3464.71	2787.07	Quantified	GO:0046872(MF:metal ion binding)			Nucleus
A0A1S3CTE9	A0A1S3CTE9|A0A1S3CTE9_DIACI	S	ADIDGLS(+79.97)DIS(+79.97)DKSDPFT(+79.97)DNFDQIGTK	7	26	Transcriptional regulator ATRX-like OS=Diaphorina citri OX=121845 GN=LOC103504893 PE=4 SV=1	Transcriptional regulator ATRX-like	LOC103504893	29.49	3053.19	-4	691	716	S7:Phosphorylation (STY):1.99;S10:Phosphorylation (STY):0.00;T17:Phosphorylation (STY):0.00	S697	ADIDGLSDISDKS	309.85	1252.05			300.657	712.711	Quantified	GO:0046872(MF:metal ion binding)			Nucleus
A0A1S3CTE9	A0A1S3CTE9|A0A1S3CTE9_DIACI	S	ADIDGLS(+79.97)DIS(+79.97)DKSDPFT(+79.97)DNFDQIGTK	10	26	Transcriptional regulator ATRX-like OS=Diaphorina citri OX=121845 GN=LOC103504893 PE=4 SV=1	Transcriptional regulator ATRX-like	LOC103504893	29.49	3053.19	-4	691	716	S7:Phosphorylation (STY):1.99;S10:Phosphorylation (STY):0.00;T17:Phosphorylation (STY):0.00	S700	DGLSDISDKSDPF	309.85	1252.05			300.657	712.711	Quantified	GO:0046872(MF:metal ion binding)			Nucleus
A0A1S3CTE9	A0A1S3CTE9|A0A1S3CTE9_DIACI	T	ADIDGLS(+79.97)DIS(+79.97)DKSDPFT(+79.97)DNFDQIGTK	17	26	Transcriptional regulator ATRX-like OS=Diaphorina citri OX=121845 GN=LOC103504893 PE=4 SV=1	Transcriptional regulator ATRX-like	LOC103504893	29.49	3053.19	-4	691	716	S7:Phosphorylation (STY):1.99;S10:Phosphorylation (STY):0.00;T17:Phosphorylation (STY):0.00	T707	DKSDPFTDNFDQI	309.85	1252.05			300.657	712.711	Quantified	GO:0046872(MF:metal ion binding)			Nucleus
A0A1S3CTE9	A0A1S3CTE9|A0A1S3CTE9_DIACI	S	ADIDGLS(+79.97)DIS(+79.97)DKSDPFTDNFDQIGTK	7	26	Transcriptional regulator ATRX-like OS=Diaphorina citri OX=121845 GN=LOC103504893 PE=4 SV=1	Transcriptional regulator ATRX-like	LOC103504893	26.94	2973.22	-3	691	716	S7:Phosphorylation (STY):0.00;S10:Phosphorylation (STY):0.00	S697	ADIDGLSDISDKS	1019.11	684.397	2151.62	7299.7	1899.31	1825.59	Quantified	GO:0046872(MF:metal ion binding)			Nucleus
A0A1S3CTE9	A0A1S3CTE9|A0A1S3CTE9_DIACI	S	ADIDGLS(+79.97)DIS(+79.97)DKSDPFTDNFDQIGTK	10	26	Transcriptional regulator ATRX-like OS=Diaphorina citri OX=121845 GN=LOC103504893 PE=4 SV=1	Transcriptional regulator ATRX-like	LOC103504893	26.94	2973.22	-3	691	716	S7:Phosphorylation (STY):0.00;S10:Phosphorylation (STY):0.00	S700	DGLSDISDKSDPF	1019.11	684.397	2151.62	7299.7	1899.31	1825.59	Quantified	GO:0046872(MF:metal ion binding)			Nucleus
A0A1S3CTE9	A0A1S3CTE9|A0A1S3CTE9_DIACI	S	ADIDGLSDIS(+79.97)DK	10	12	Transcriptional regulator ATRX-like OS=Diaphorina citri OX=121845 GN=LOC103504893 PE=4 SV=1	Transcriptional regulator ATRX-like	LOC103504893	44.22	1327.55	-5	691	702	S10:Phosphorylation (STY):0.00	S700	DGLSDISDKSDPF	128.482	248.254	328.326	446.327	104.104	102.466	Quantified	GO:0046872(MF:metal ion binding)			Nucleus
A0A1S3CTE9	A0A1S3CTE9|A0A1S3CTE9_DIACI	S	ADIDGLSDIS(+79.97)DKS(+79.97)DPFTDNFDQIGTK	10	26	Transcriptional regulator ATRX-like OS=Diaphorina citri OX=121845 GN=LOC103504893 PE=4 SV=1	Transcriptional regulator ATRX-like	LOC103504893	71.3	2973.22	-0.1	691	716	S10:Phosphorylation (STY):28.36;S13:Phosphorylation (STY):25.70	S700	DGLSDISDKSDPF	12957.2	6810.08	5788.22	3818.24	23083.8	13235.1	Quantified	GO:0046872(MF:metal ion binding)			Nucleus
A0A1S3CTE9	A0A1S3CTE9|A0A1S3CTE9_DIACI	S	ADIDGLSDIS(+79.97)DKS(+79.97)DPFTDNFDQIGTK	13	26	Transcriptional regulator ATRX-like OS=Diaphorina citri OX=121845 GN=LOC103504893 PE=4 SV=1	Transcriptional regulator ATRX-like	LOC103504893	71.3	2973.22	-0.1	691	716	S10:Phosphorylation (STY):28.36;S13:Phosphorylation (STY):25.70	S703	SDISDKSDPFTDN	12957.2	6810.08	5788.22	3818.24	23083.8	13235.1	Quantified	GO:0046872(MF:metal ion binding)			Nucleus
A0A1S3CTE9	A0A1S3CTE9|A0A1S3CTE9_DIACI	S	ADIDGLSDIS(+79.97)DKSDPFT(+79.97)DNFDQIGTK	10	26	Transcriptional regulator ATRX-like OS=Diaphorina citri OX=121845 GN=LOC103504893 PE=4 SV=1	Transcriptional regulator ATRX-like	LOC103504893	56.04	2973.22	-2.1	691	716	S10:Phosphorylation (STY):0.00;T17:Phosphorylation (STY):0.00	S700	DGLSDISDKSDPF	12957.2	6810.08	5788.22	7299.7	224.624	1825.59	Quantified	GO:0046872(MF:metal ion binding)			Nucleus
A0A1S3CTE9	A0A1S3CTE9|A0A1S3CTE9_DIACI	T	ADIDGLSDIS(+79.97)DKSDPFT(+79.97)DNFDQIGTK	17	26	Transcriptional regulator ATRX-like OS=Diaphorina citri OX=121845 GN=LOC103504893 PE=4 SV=1	Transcriptional regulator ATRX-like	LOC103504893	56.04	2973.22	-2.1	691	716	S10:Phosphorylation (STY):0.00;T17:Phosphorylation (STY):0.00	T707	DKSDPFTDNFDQI	12957.2	6810.08	5788.22	7299.7	224.624	1825.59	Quantified	GO:0046872(MF:metal ion binding)			Nucleus
A0A1S3CTE9	A0A1S3CTE9|A0A1S3CTE9_DIACI	S	ADIDGLSDISDKS(+79.97)DPFTDNFDQIGTK	13	26	Transcriptional regulator ATRX-like OS=Diaphorina citri OX=121845 GN=LOC103504893 PE=4 SV=1	Transcriptional regulator ATRX-like	LOC103504893	59.25	2893.25	-1.6	691	716	S13:Phosphorylation (STY):0.00	S703	SDISDKSDPFTDN	379.95	750.653	1605.09	200.467	3046.93	1005.63	Quantified	GO:0046872(MF:metal ion binding)			Nucleus
A0A1S3CTE9	A0A1S3CTE9|A0A1S3CTE9_DIACI	T	ADIDGLSDISDKSDPFT(+79.97)DNFDQIGTK	17	26	Transcriptional regulator ATRX-like OS=Diaphorina citri OX=121845 GN=LOC103504893 PE=4 SV=1	Transcriptional regulator ATRX-like	LOC103504893	49.05	2893.25	-5	691	716	T17:Phosphorylation (STY):4.59	T707	DKSDPFTDNFDQI	426.452	750.653	282.17	772.56	534.501	1005.63	Quantified	GO:0046872(MF:metal ion binding)			Nucleus
A0A1S4EFJ0	A0A1S4EFJ0|A0A1S4EFJ0_DIACI	S	ADISS(+79.97)PTEFR	5	10	Neural Wiskott-Aldrich syndrome protein OS=Diaphorina citri OX=121845 GN=LOC103512255 PE=4 SV=1	Neural Wiskott-Aldrich syndrome protein	LOC103512255	43.89	1201.5	-3.1	187	196	S5:Phosphorylation (STY):17.01	S191	TKADISSPTEFRH	1389.77	1386.8	4942.23	2489.92	671.686	2204.74	Quantified	GO:0007015(BP:actin filament organization);GO:2000601(BP:positive regulation of Arp2/3 complex-mediated actin nucleation);GO:0003779(MF:actin binding)	K05747(NA)	ko04520(Adherens junction);ko04530(Tight junction)	Nucleus	PF00568(WH1 domain);PF00786(P21-Rho-binding domain)
A0A3Q0JEE3	A0A3Q0JEE3|A0A3Q0JEE3_DIACI	S	ADKS(+79.97)PDFEKPDDKEPLDK	4	18	Titin-like OS=Diaphorina citri OX=121845 GN=LOC113471684 PE=4 SV=1	Titin-like	LOC113471684	46.98	2152.96	-2.2	244	261		S247	KVKADKSPDFEKP	7675.67	1453.84	5831.18	2761.8	1522.47	2424.02	Quantified
A0A3Q0IZQ4	A0A3Q0IZQ4|A0A3Q0IZQ4_DIACI	S	ADLAEQAVS(+79.97)K	9	10	Myosin heavy chain, muscle-like OS=Diaphorina citri OX=121845 GN=LOC103512418 PE=3 SV=1	Myosin heavy chain, muscle-like	LOC103512418	59.19	1110.5	0.9	1177	1186		S1185	LAEQAVSKIRTKG	6827.79	1099.96	4190.38	6493.78	7252.31	5460.14	Quantified	GO:0016459(CC:myosin complex);GO:0003779(MF:actin binding);GO:0005524(MF:ATP binding);GO:0003774(MF:motor activity)				PF00063(Myosin head (motor domain));PF01576(Myosin tail)
A0A1S3DQY5	A0A1S3DQY5|A0A1S3DQY5_DIACI	Y	ADLPAPNQY(+79.97)QSDIC(+57.02)VTTSC(+57.02)LNK	9	22	Outer dense fiber protein 3-like protein 2 OS=Diaphorina citri OX=121845 GN=LOC103523167 PE=4 SV=1	Outer dense fiber protein 3-like protein 2	LOC103523167	43.02	2574.11	0.6	44	65	Y9:Phosphorylation (STY):0.00;C14:Carbamidomethylation:1000.00;C19:Carbamidomethylation:1000.00	Y52	LPAPNQYQSDICV	780.408	1521.23	4112.1		787.309	1012.3	Quantified					PF07004(Sperm-tail PG-rich repeat)
A0A1S3DQY5	A0A1S3DQY5|A0A1S3DQY5_DIACI	S	ADLPAPNQYQS(+79.97)DIC(+57.02)VTTSC(+57.02)LNK	11	22	Outer dense fiber protein 3-like protein 2 OS=Diaphorina citri OX=121845 GN=LOC103523167 PE=4 SV=1	Outer dense fiber protein 3-like protein 2	LOC103523167	50.61	2574.11	-2.6	44	65	S11:Phosphorylation (STY):4.64;C14:Carbamidomethylation:1000.00;C19:Carbamidomethylation:1000.00	S54	APNQYQSDICVTT	1606.13	905.809	1258.02	445.788	1430.85	1046.33	Quantified					PF07004(Sperm-tail PG-rich repeat)
A0A1S3DLK3	A0A1S3DLK3|A0A1S3DLK3_DIACI	S	ADLTGGS(+79.97)GQEYDFK	7	14	Uncharacterized protein LOC103521004 OS=Diaphorina citri OX=121845 GN=LOC103521004 PE=4 SV=1	Uncharacterized protein LOC103521004	LOC103521004	63.86	1566.62	-1.4	68	81	S7:Phosphorylation (STY):35.82	S74	ADLTGGSGQEYDF	2903.56	1471.84	2464.91	737.117	302.166	1274.67	Quantified
A0A1S3D331	A0A1S3D331|A0A1S3D331_DIACI	S	ADNQS(+79.97)NDNETQLS(+79.97)SNIK	5	17	Uncharacterized protein LOC103509555 OS=Diaphorina citri OX=121845 GN=LOC103509555 PE=4 SV=1	Uncharacterized protein LOC103509555	LOC103509555	46.57	2036.77	0.5	132	148	S5:Phosphorylation (STY):39.44;S13:Phosphorylation (STY):14.02	S136	EKADNQSNDNETQ	290.578	95.7506	393.807	456.642	230.425	126.15	Quantified
A0A1S3D331	A0A1S3D331|A0A1S3D331_DIACI	S	ADNQS(+79.97)NDNETQLS(+79.97)SNIK	13	17	Uncharacterized protein LOC103509555 OS=Diaphorina citri OX=121845 GN=LOC103509555 PE=4 SV=1	Uncharacterized protein LOC103509555	LOC103509555	46.57	2036.77	0.5	132	148	S5:Phosphorylation (STY):39.44;S13:Phosphorylation (STY):14.02	S144	DNETQLSSNIKIT	290.578	95.7506	393.807	456.642	230.425	126.15	Quantified
A0A1S3D331	A0A1S3D331|A0A1S3D331_DIACI	S	ADNQS(+79.97)NDNETQLSSNIK	5	17	Uncharacterized protein LOC103509555 OS=Diaphorina citri OX=121845 GN=LOC103509555 PE=4 SV=1	Uncharacterized protein LOC103509555	LOC103509555	61.15	1956.81	-0.6	132	148	S5:Phosphorylation (STY):52.68	S136	EKADNQSNDNETQ	4982.8	6721.95	17786.2	1625.5	4445.17	2946.24	Quantified
A0A1S3D331	A0A1S3D331|A0A1S3D331_DIACI	S	ADNQSNDNETQLS(+79.97)SNIK	13	17	Uncharacterized protein LOC103509555 OS=Diaphorina citri OX=121845 GN=LOC103509555 PE=4 SV=1	Uncharacterized protein LOC103509555	LOC103509555	43.48	1956.81	5.6	132	148	S13:Phosphorylation (STY):12.28	S144	DNETQLSSNIKIT	6009.9	2048.45	20447.7	1018.3	2797.19	1765.77	Quantified
A0A1S3D331	A0A1S3D331|A0A1S3D331_DIACI	S	ADNQSNDNETQLSS(+79.97)NIK	14	17	Uncharacterized protein LOC103509555 OS=Diaphorina citri OX=121845 GN=LOC103509555 PE=4 SV=1	Uncharacterized protein LOC103509555	LOC103509555	56.63	1956.81	1.2	132	148	S14:Phosphorylation (STY):14.02	S145	NETQLSSNIKITP	6009.9	1852.69	8894.15	285.501	3824.2	1350.09	Quantified
A0A1S3D3V4	A0A1S3D3V4|A0A1S3D3V4_DIACI	S	ADNYYQRPES(+79.97)FIEPWISAR	10	19	Radial spoke head protein 6 homolog A OS=Diaphorina citri OX=121845 GN=LOC103510890 PE=4 SV=1	Radial spoke head protein 6 homolog A	LOC103510890	60.63	2421.08	-9.7	109	127	S10:Phosphorylation (STY):37.50	S118	YYQRPESFIEPWI	254.202	146.755	312.921		281.377	311.793	Quantified	GO:0060271(BP:cilium assembly);GO:0060294(BP:cilium movement involved in cell motility);GO:0001534(CC:radial spoke)				PF04712(Radial spokehead-like protein)
A0A3Q0J531	A0A3Q0J531|A0A3Q0J531_DIACI	S	ADPNAAEVIS(+79.97)ETPPPS(+79.97)PSPPR	10	21	Target of rapamycin complex subunit lst8 OS=Diaphorina citri OX=121845 GN=LOC103514889 PE=3 SV=1	Target of rapamycin complex subunit lst8	LOC103514889	36.94	2287.98	5	123	143	S10:Phosphorylation (STY):0.00;S16:Phosphorylation (STY):0.00	S132	NAAEVISETPPPS	149.8	1148.59	471.742	502.101	429.645	365.532	Quantified	GO:0031929(BP:TOR signaling);GO:0031931(CC:TORC1 complex);GO:0031932(CC:TORC2 complex)	K08266(NA)	ko04136(Autophagy - other);ko04138(Autophagy - yeast);ko04140(Autophagy - animal);ko04150(mTOR signaling pathway);ko04151(PI3K-Akt signaling pathway)	Cytoplasm	PF00400(WD domain, G-beta repeat)
A0A3Q0J531	A0A3Q0J531|A0A3Q0J531_DIACI	S	ADPNAAEVIS(+79.97)ETPPPS(+79.97)PSPPR	16	21	Target of rapamycin complex subunit lst8 OS=Diaphorina citri OX=121845 GN=LOC103514889 PE=3 SV=1	Target of rapamycin complex subunit lst8	LOC103514889	36.94	2287.98	5	123	143	S10:Phosphorylation (STY):0.00;S16:Phosphorylation (STY):0.00	S138	SETPPPSPSPPRC	149.8	1148.59	471.742	502.101	429.645	365.532	Quantified	GO:0031929(BP:TOR signaling);GO:0031931(CC:TORC1 complex);GO:0031932(CC:TORC2 complex)	K08266(NA)	ko04136(Autophagy - other);ko04138(Autophagy - yeast);ko04140(Autophagy - animal);ko04150(mTOR signaling pathway);ko04151(PI3K-Akt signaling pathway)	Cytoplasm	PF00400(WD domain, G-beta repeat)
A0A3Q0J531	A0A3Q0J531|A0A3Q0J531_DIACI	S	ADPNAAEVIS(+79.97)ETPPPSPSPPR	10	21	Target of rapamycin complex subunit lst8 OS=Diaphorina citri OX=121845 GN=LOC103514889 PE=3 SV=1	Target of rapamycin complex subunit lst8	LOC103514889	45.16	2208.01	4.7	123	143	S10:Phosphorylation (STY):0.00	S132	NAAEVISETPPPS	166.854	1492.14	1294.48	1066.45	1255.67	555.323	Quantified	GO:0031929(BP:TOR signaling);GO:0031931(CC:TORC1 complex);GO:0031932(CC:TORC2 complex)	K08266(NA)	ko04136(Autophagy - other);ko04138(Autophagy - yeast);ko04140(Autophagy - animal);ko04150(mTOR signaling pathway);ko04151(PI3K-Akt signaling pathway)	Cytoplasm	PF00400(WD domain, G-beta repeat)
A0A3Q0J531	A0A3Q0J531|A0A3Q0J531_DIACI	T	ADPNAAEVISET(+79.97)PPPS(+79.97)PSPPR	12	21	Target of rapamycin complex subunit lst8 OS=Diaphorina citri OX=121845 GN=LOC103514889 PE=3 SV=1	Target of rapamycin complex subunit lst8	LOC103514889	39.02	2287.98	6.8	123	143	T12:Phosphorylation (STY):25.66;S16:Phosphorylation (STY):0.00	T134	AEVISETPPPSPS	4100.26	1359.46	2155.77	376.86	429.645	1386.05	Quantified	GO:0031929(BP:TOR signaling);GO:0031931(CC:TORC1 complex);GO:0031932(CC:TORC2 complex)	K08266(NA)	ko04136(Autophagy - other);ko04138(Autophagy - yeast);ko04140(Autophagy - animal);ko04150(mTOR signaling pathway);ko04151(PI3K-Akt signaling pathway)	Cytoplasm	PF00400(WD domain, G-beta repeat)
A0A3Q0J531	A0A3Q0J531|A0A3Q0J531_DIACI	S	ADPNAAEVISET(+79.97)PPPS(+79.97)PSPPR	16	21	Target of rapamycin complex subunit lst8 OS=Diaphorina citri OX=121845 GN=LOC103514889 PE=3 SV=1	Target of rapamycin complex subunit lst8	LOC103514889	39.02	2287.98	6.8	123	143	T12:Phosphorylation (STY):25.66;S16:Phosphorylation (STY):0.00	S138	SETPPPSPSPPRC	4100.26	1359.46	2155.77	376.86	429.645	1386.05	Quantified	GO:0031929(BP:TOR signaling);GO:0031931(CC:TORC1 complex);GO:0031932(CC:TORC2 complex)	K08266(NA)	ko04136(Autophagy - other);ko04138(Autophagy - yeast);ko04140(Autophagy - animal);ko04150(mTOR signaling pathway);ko04151(PI3K-Akt signaling pathway)	Cytoplasm	PF00400(WD domain, G-beta repeat)
A0A3Q0J531	A0A3Q0J531|A0A3Q0J531_DIACI	T	ADPNAAEVISET(+79.97)PPPSPSPPR	12	21	Target of rapamycin complex subunit lst8 OS=Diaphorina citri OX=121845 GN=LOC103514889 PE=3 SV=1	Target of rapamycin complex subunit lst8	LOC103514889	54.71	2208.01	4.8	123	143	T12:Phosphorylation (STY):8.22	T134	AEVISETPPPSPS	6187	6690.95	5109.59	3671.39	4600.54	3415.02	Quantified	GO:0031929(BP:TOR signaling);GO:0031931(CC:TORC1 complex);GO:0031932(CC:TORC2 complex)	K08266(NA)	ko04136(Autophagy - other);ko04138(Autophagy - yeast);ko04140(Autophagy - animal);ko04150(mTOR signaling pathway);ko04151(PI3K-Akt signaling pathway)	Cytoplasm	PF00400(WD domain, G-beta repeat)
A0A3Q0J531	A0A3Q0J531|A0A3Q0J531_DIACI	S	ADPNAAEVISETPPPSPS(+79.97)PPR	18	21	Target of rapamycin complex subunit lst8 OS=Diaphorina citri OX=121845 GN=LOC103514889 PE=3 SV=1	Target of rapamycin complex subunit lst8	LOC103514889	39.46	2208.01	1.4	123	143	S18:Phosphorylation (STY):14.04	S140	TPPPSPSPPRCTK	251.131	385.057	314.542	120.583	418.72	499.654	Quantified	GO:0031929(BP:TOR signaling);GO:0031931(CC:TORC1 complex);GO:0031932(CC:TORC2 complex)	K08266(NA)	ko04136(Autophagy - other);ko04138(Autophagy - yeast);ko04140(Autophagy - animal);ko04150(mTOR signaling pathway);ko04151(PI3K-Akt signaling pathway)	Cytoplasm	PF00400(WD domain, G-beta repeat)
A0A1S3CY59	A0A1S3CY59|A0A1S3CY59_DIACI	S	ADPPANSDSQTS(+79.97)AEVDSQNK	12	20	Sarcalumenin OS=Diaphorina citri OX=121845 GN=LOC103507509 PE=4 SV=1	Sarcalumenin	LOC103507509	27.85	2139.86	11	292	311	S12:Phosphorylation (STY):0.00	S303	NSDSQTSAEVDSQ	687.744		2695.55	1591.78	1294.55	448.697	Quantified	GO:0005525(MF:GTP binding)				PF16880(N-terminal EH-domain containing protein)
A0A1S4E9G9	A0A1S4E9G9|A0A1S4E9G9_DIACI	S	ADPS(+79.97)GSQEYFK	4	11	Peroxiredoxin 1 OS=Diaphorina citri OX=121845 GN=LOC103507521 PE=3 SV=1	Peroxiredoxin 1	LOC103507521	44.3	1307.51	-4.7	182	192	S4:Phosphorylation (STY):0.00	S185	TMKADPSGSQEYF	5255.14	1685.17	7169.18	4602.35	1197.23	5624.39	Quantified	GO:0045454(BP:cell redox homeostasis);GO:0005623(CC:cell);GO:0051920(MF:peroxiredoxin activity)	K13279(NA)	ko04146(Peroxisome)		PF10417(C-terminal domain of 1-Cys peroxiredoxin);PF00578(AhpC/TSA family)
A0A1S4E9G9	A0A1S4E9G9|A0A1S4E9G9_DIACI	S	ADPSGS(+79.97)QEYFK	6	11	Peroxiredoxin 1 OS=Diaphorina citri OX=121845 GN=LOC103507521 PE=3 SV=1	Peroxiredoxin 1	LOC103507521	43.13	1307.51	-3.7	182	192	S6:Phosphorylation (STY):14.04	S187	KADPSGSQEYFKT	5255.14	274.768	5685.85	2603.85	13835	5624.39	Quantified	GO:0045454(BP:cell redox homeostasis);GO:0005623(CC:cell);GO:0051920(MF:peroxiredoxin activity)	K13279(NA)	ko04146(Peroxisome)		PF10417(C-terminal domain of 1-Cys peroxiredoxin);PF00578(AhpC/TSA family)
A0A1S4E8G8	A0A1S4E8G8|A0A1S4E8G8_DIACI:A0A1S3CWV6|A0A1S3CWV6_DIACI:A0A1S4E8H7|A0A1S4E8H7_DIACI:A0A1S3CY28|A0A1S3CY28_DIACI	S	ADRVS(+79.97)LNEQAASNSTTNLK	5	19	Phosphatidylinositol 4-phosphate 5-kinase type-1 alpha-like isoform X1 OS=Diaphorina citri OX=121845 GN=LOC103506746 PE=4 SV=1	Phosphatidylinositol 4-phosphate 5-kinase type-1 alpha-like isoform X1	LOC103506746	65.82	2097.97	-2.1	345	363	S5:Phosphorylation (STY):85.08	S349	EKADRVSLNEQAA	44573	61865.1	87296.6	64846.3	43223.4	42608.9	Quantified	GO:0005524(MF:ATP binding);GO:0016307(MF:phosphatidylinositol phosphate kinase activity)	K00889(NA)	ko00562(Inositol phosphate metabolism);ko04011(MAPK signaling pathway - yeast);ko04070(Phosphatidylinositol signaling system);ko04072(Phospholipase D signaling pathway);ko04139(Mitophagy - yeast);ko04144(Endocytosis);ko04510(Focal adhesion);ko04810(Regulation of actin cytoskeleton)		PF01504(Phosphatidylinositol-4-phosphate 5-Kinase)
A0A3Q0IRX6	A0A3Q0IRX6|A0A3Q0IRX6_DIACI	S	ADS(+79.97)AES(+79.97)NLSLIR	3	12	Paramyosin, long form OS=Diaphorina citri OX=121845 GN=LOC103508718 PE=4 SV=1	Paramyosin, long form	LOC103508718	50.43	1434.58	-2.2	1310	1321	S3:Phosphorylation (STY):55.13;S6:Phosphorylation (STY):19.27	S1312	AEDRADSAESNLS	2904.73	1750.8	1703.08	343.089	1514.35	1840.25	Quantified	GO:0016459(CC:myosin complex);GO:0003774(MF:motor activity)				PF01576(Myosin tail);PF12738(twin BRCT domain)
A0A3Q0IRX6	A0A3Q0IRX6|A0A3Q0IRX6_DIACI	S	ADS(+79.97)AES(+79.97)NLSLIR	6	12	Paramyosin, long form OS=Diaphorina citri OX=121845 GN=LOC103508718 PE=4 SV=1	Paramyosin, long form	LOC103508718	50.43	1434.58	-2.2	1310	1321	S3:Phosphorylation (STY):55.13;S6:Phosphorylation (STY):19.27	S1315	RADSAESNLSLIR	2904.73	1750.8	1703.08	343.089	1514.35	1840.25	Quantified	GO:0016459(CC:myosin complex);GO:0003774(MF:motor activity)				PF01576(Myosin tail);PF12738(twin BRCT domain)
A0A3Q0IRX6	A0A3Q0IRX6|A0A3Q0IRX6_DIACI	S	ADS(+79.97)AESNLS(+79.97)LIR	3	12	Paramyosin, long form OS=Diaphorina citri OX=121845 GN=LOC103508718 PE=4 SV=1	Paramyosin, long form	LOC103508718	61.31	1434.58	-0.3	1310	1321	S3:Phosphorylation (STY):77.25;S9:Phosphorylation (STY):32.97	S1312	AEDRADSAESNLS	13001.4	8145.44	9386.72	13475.7	8629.04	8489.88	Quantified	GO:0016459(CC:myosin complex);GO:0003774(MF:motor activity)				PF01576(Myosin tail);PF12738(twin BRCT domain)
A0A3Q0IRX6	A0A3Q0IRX6|A0A3Q0IRX6_DIACI	S	ADS(+79.97)AESNLS(+79.97)LIR	9	12	Paramyosin, long form OS=Diaphorina citri OX=121845 GN=LOC103508718 PE=4 SV=1	Paramyosin, long form	LOC103508718	61.31	1434.58	-0.3	1310	1321	S3:Phosphorylation (STY):77.25;S9:Phosphorylation (STY):32.97	S1318	SAESNLSLIRAKH	13001.4	8145.44	9386.72	13475.7	8629.04	8489.88	Quantified	GO:0016459(CC:myosin complex);GO:0003774(MF:motor activity)				PF01576(Myosin tail);PF12738(twin BRCT domain)
A0A3Q0IRX6	A0A3Q0IRX6|A0A3Q0IRX6_DIACI	S	ADS(+79.97)AESNLSLIR	3	12	Paramyosin, long form OS=Diaphorina citri OX=121845 GN=LOC103508718 PE=4 SV=1	Paramyosin, long form	LOC103508718	73.69	1354.61	-1.3	1310	1321	S3:Phosphorylation (STY):57.45	S1312	AEDRADSAESNLS	116031	116272	118292	196224	81205.5	70532.1	Quantified	GO:0016459(CC:myosin complex);GO:0003774(MF:motor activity)				PF01576(Myosin tail);PF12738(twin BRCT domain)
A0A3Q0JB86	A0A3Q0JB86|A0A3Q0JB86_DIACI	S	ADS(+79.97)FEGHEEAVR	3	12	RING finger protein 207 OS=Diaphorina citri OX=121845 GN=LOC113470041 PE=4 SV=1	RING finger protein 207	LOC113470041	48.58	1425.56	1.3	1171	1182		S1173	GLKKADSFEGHEE	800.248	384.4	1391.24	1114.45	946.519	2330.64	Quantified	GO:0030544(MF:Hsp70 protein binding);GO:0008270(MF:zinc ion binding)				PF00643(B-box zinc finger);PF00097(Zinc finger, C3HC4 type (RING finger))
A0A1S3DB21	A0A1S3DB21|A0A1S3DB21_DIACI	S	ADS(+79.97)PDAENASEVPVKPEPVVSLTSENFNDVIK	3	32	Thioredoxin domain-containing protein 5 homolog OS=Diaphorina citri OX=121845 GN=LOC103515126 PE=3 SV=1	Thioredoxin domain-containing protein 5 homolog	LOC103515126	47.43	3476.62	-2.9	268	299	S3:Phosphorylation (STY):17.76	S270	LNKKADSPDAENA	446.478	781.443	759.777	309.016	526.929	1245.22	Quantified	GO:0045454(BP:cell redox homeostasis);GO:0005623(CC:cell);GO:0003756(MF:protein disulfide isomerase activity)	K13984(NA)	ko04141(Protein processing in endoplasmic reticulum)		PF00085(Thioredoxin)
A0A3Q0J7J8	A0A3Q0J7J8|A0A3Q0J7J8_DIACI	S	ADS(+79.97)PDPLGSALPEDFPGK	3	18	Bromodomain-containing protein 2-like OS=Diaphorina citri OX=121845 GN=LOC103514083 PE=4 SV=1	Bromodomain-containing protein 2-like	LOC103514083	57.7	1891.82	3.1	286	303	S3:Phosphorylation (STY):42.99	S288	VKRKADSPDPLGS	1512.78	1069.28	482.905	2421.53	236.669	293.989	Quantified					PF17105(C-terminal domain of bromodomain protein 4);PF17035(Bromodomain extra-terminal - transcription regulation);PF00439(Bromodomain)
A0A3Q0IRX6	A0A3Q0IRX6|A0A3Q0IRX6_DIACI	S	ADSAES(+79.97)NLSLIR	6	12	Paramyosin, long form OS=Diaphorina citri OX=121845 GN=LOC103508718 PE=4 SV=1	Paramyosin, long form	LOC103508718	30.78	1354.61	8	1310	1321	S6:Phosphorylation (STY):16.66	S1315	RADSAESNLSLIR	204.932	687.571	644.741	717.893	1791	70532.1	Quantified	GO:0016459(CC:myosin complex);GO:0003774(MF:motor activity)				PF01576(Myosin tail);PF12738(twin BRCT domain)
A0A3Q0IRX6	A0A3Q0IRX6|A0A3Q0IRX6_DIACI	S	ADSAESNLS(+79.97)LIR	9	12	Paramyosin, long form OS=Diaphorina citri OX=121845 GN=LOC103508718 PE=4 SV=1	Paramyosin, long form	LOC103508718	63.25	1354.61	-0.5	1310	1321	S9:Phosphorylation (STY):32.69	S1318	SAESNLSLIRAKH	17403	17295.1	18445.7	12378.5	14018.1	10977.2	Quantified	GO:0016459(CC:myosin complex);GO:0003774(MF:motor activity)				PF01576(Myosin tail);PF12738(twin BRCT domain)
A0A1S3DH05	A0A1S3DH05|A0A1S3DH05_DIACI	T	ADT(+79.97)APAT(+79.97)PVAPAAASAETPK	3	20	Histone H1-like OS=Diaphorina citri OX=121845 GN=LOC103518306 PE=3 SV=1	Histone H1-like	LOC103518306	28.55	1995.86	0.1	2	21	T3:Phosphorylation (STY):19.27;T7:Phosphorylation (STY):24.34	T4	___MADTAPATPV	180.301	122.05	169.945	166.397	184.411	112.24	Quantified	GO:0006334(BP:nucleosome assembly);GO:0042025(CC:host cell nucleus);GO:0000786(CC:nucleosome);GO:0005634(CC:nucleus);GO:0003677(MF:DNA binding)			Chromosome;Nucleus	PF00538(linker histone H1 and H5 family)
A0A1S3DH05	A0A1S3DH05|A0A1S3DH05_DIACI	T	ADT(+79.97)APAT(+79.97)PVAPAAASAETPK	7	20	Histone H1-like OS=Diaphorina citri OX=121845 GN=LOC103518306 PE=3 SV=1	Histone H1-like	LOC103518306	28.55	1995.86	0.1	2	21	T3:Phosphorylation (STY):19.27;T7:Phosphorylation (STY):24.34	T8	ADTAPATPVAPAA	180.301	122.05	169.945	166.397	184.411	112.24	Quantified	GO:0006334(BP:nucleosome assembly);GO:0042025(CC:host cell nucleus);GO:0000786(CC:nucleosome);GO:0005634(CC:nucleus);GO:0003677(MF:DNA binding)			Chromosome;Nucleus	PF00538(linker histone H1 and H5 family)
A0A3Q0IZK0	A0A3Q0IZK0|A0A3Q0IZK0_DIACI	T	ADT(+79.97)GVYTVTAK	3	11	LOW QUALITY PROTEIN: twitchin-like OS=Diaphorina citri OX=121845 GN=LOC103512392 PE=4 SV=1	LOW QUALITY PROTEIN: twitchin-like	LOC103512392	45.75	1204.54	-1	3283	3293	T3:Phosphorylation (STY):49.37	T3285	KAKRADTGVYTVT	532.322	342.272	219.597	115.291	858.792	546.964	Quantified					PF07679(Immunoglobulin I-set domain);PF00041(Fibronectin type III domain)
A0A3Q0IJL7	A0A3Q0IJL7|A0A3Q0IJL7_DIACI	T	ADT(+79.97)PERS(+79.97)PVSPTR	3	13	Dentin sialophosphoprotein-like OS=Diaphorina citri OX=121845 GN=LOC103505284 PE=4 SV=1	Dentin sialophosphoprotein-like	LOC103505284	32.76	1571.64	-3.2	332	344	T3:Phosphorylation (STY):20.76;S7:Phosphorylation (STY):28.36	T334	SSLRADTPERSPV	1520.69	2590.85	2062.63	4469.3	4655.46	3536.42	Quantified
A0A3Q0IJL7	A0A3Q0IJL7|A0A3Q0IJL7_DIACI	S	ADT(+79.97)PERS(+79.97)PVSPTR	7	13	Dentin sialophosphoprotein-like OS=Diaphorina citri OX=121845 GN=LOC103505284 PE=4 SV=1	Dentin sialophosphoprotein-like	LOC103505284	32.76	1571.64	-3.2	332	344	T3:Phosphorylation (STY):20.76;S7:Phosphorylation (STY):28.36	S338	ADTPERSPVSPTR	1520.69	2590.85	2062.63	4469.3	4655.46	3536.42	Quantified
A0A3Q0IJL7	A0A3Q0IJL7|A0A3Q0IJL7_DIACI	T	ADT(+79.97)PERSPVSPTR	3	13	Dentin sialophosphoprotein-like OS=Diaphorina citri OX=121845 GN=LOC103505284 PE=4 SV=1	Dentin sialophosphoprotein-like	LOC103505284	28.16	1491.67	-3.4	332	344	T3:Phosphorylation (STY):6.65	T334	SSLRADTPERSPV	474.168	1218.4	412.902	183.784	1319.34	1160.31	Quantified
Q0PXY1	Q0PXY1|Q0PXY1_DIACI	S	ADVGAGS(+79.97)TEVEFK	7	13	40S ribosomal protein S10-like OS=Diaphorina citri OX=121845 GN=LOC103509420 PE=2 SV=1	40S ribosomal protein S10-like	LOC103509420	59.96	1388.59	-2.4	134	146	S7:Phosphorylation (STY):9.34	S140	ADVGAGSTEVEFK	2849.37	880.265	1411.44	3626.59	3156.17	2282.91	Quantified	GO:0005840(CC:ribosome)	K02947(NA)	ko03010(Ribosome)		PF03501(Plectin/S10 domain)
Q0PXY1	Q0PXY1|Q0PXY1_DIACI	T	ADVGAGST(+79.97)EVEFK	8	13	40S ribosomal protein S10-like OS=Diaphorina citri OX=121845 GN=LOC103509420 PE=2 SV=1	40S ribosomal protein S10-like	LOC103509420	63.9	1388.59	-1.2	134	146	T8:Phosphorylation (STY):0.00	T141	DVGAGSTEVEFKG	2849.37	773	1411.44	3626.59	3156.17	2282.91	Quantified	GO:0005840(CC:ribosome)	K02947(NA)	ko03010(Ribosome)		PF03501(Plectin/S10 domain)
A0A3Q0IX69	A0A3Q0IX69|A0A3Q0IX69_DIACI	S	ADVTSTGTS(+79.97)PPPQSISTQTYDYGGGGGIGLK	9	31	Uncharacterized protein LOC103511208 OS=Diaphorina citri OX=121845 GN=LOC103511208 PE=3 SV=1	Uncharacterized protein LOC103511208	LOC103511208	61.14	3091.4	-3.9	619	649	S9:Phosphorylation (STY):12.28	S627	VTSTGTSPPPQSI	999.139	1029.91	150.448	73.4563	1422.98	1856.66	Quantified	GO:0071797(CC:LUBAC complex);GO:0046872(MF:metal ion binding);GO:0004842(MF:ubiquitin-protein transferase activity)				PF01485(IBR domain, a half RING-finger domain)
A0A3Q0J7W5	A0A3Q0J7W5|A0A3Q0J7W5_DIACI	S	ADYQIEDS(+79.97)TNTNDFQQSDSNVSSDFVK	8	27	Heterogeneous nuclear ribonucleoprotein U-like protein 2 OS=Diaphorina citri OX=121845 GN=LOC103513904 PE=4 SV=1	Heterogeneous nuclear ribonucleoprotein U-like protein 2	LOC103513904	69.78	3133.27	3.2	149	175	S8:Phosphorylation (STY):0.00	S156	DYQIEDSTNTNDF	396.848	95.4068	173.578	82.2523	381.461	487.959	Quantified					PF02037(SAP domain);PF13671(AAA domain)
A0A3Q0J7W5	A0A3Q0J7W5|A0A3Q0J7W5_DIACI	T	ADYQIEDST(+79.97)NTNDFQQSDSNVSSDFVK	9	27	Heterogeneous nuclear ribonucleoprotein U-like protein 2 OS=Diaphorina citri OX=121845 GN=LOC103513904 PE=4 SV=1	Heterogeneous nuclear ribonucleoprotein U-like protein 2	LOC103513904	63.56	3133.27	4.6	149	175	T9:Phosphorylation (STY):0.00	T157	YQIEDSTNTNDFQ	534.626	439.57	438.337	348.764	541.73	487.959	Quantified					PF02037(SAP domain);PF13671(AAA domain)
A0A3Q0J7W5	A0A3Q0J7W5|A0A3Q0J7W5_DIACI	S	ADYQIEDSTNTNDFQQS(+79.97)DSNVSSDFVK	17	27	Heterogeneous nuclear ribonucleoprotein U-like protein 2 OS=Diaphorina citri OX=121845 GN=LOC103513904 PE=4 SV=1	Heterogeneous nuclear ribonucleoprotein U-like protein 2	LOC103513904	67.75	3133.27	-4.5	149	175	S17:Phosphorylation (STY):0.00	S165	TNDFQQSDSNVSS	534.626	186.104	132.622	73.7921	326.724	183.27	Quantified					PF02037(SAP domain);PF13671(AAA domain)
A0A3Q0J7W5	A0A3Q0J7W5|A0A3Q0J7W5_DIACI	S	ADYQIEDSTNTNDFQQSDS(+79.97)NVS(+79.97)SDFVK	19	27	Heterogeneous nuclear ribonucleoprotein U-like protein 2 OS=Diaphorina citri OX=121845 GN=LOC103513904 PE=4 SV=1	Heterogeneous nuclear ribonucleoprotein U-like protein 2	LOC103513904	41.99	3213.23	16	149	175	S19:Phosphorylation (STY):11.10;S22:Phosphorylation (STY):0.00	S167	DFQQSDSNVSSDF	256.451			62.6081	228.577	136.364	Quantified					PF02037(SAP domain);PF13671(AAA domain)
A0A3Q0J7W5	A0A3Q0J7W5|A0A3Q0J7W5_DIACI	S	ADYQIEDSTNTNDFQQSDS(+79.97)NVS(+79.97)SDFVK	22	27	Heterogeneous nuclear ribonucleoprotein U-like protein 2 OS=Diaphorina citri OX=121845 GN=LOC103513904 PE=4 SV=1	Heterogeneous nuclear ribonucleoprotein U-like protein 2	LOC103513904	41.99	3213.23	16	149	175	S19:Phosphorylation (STY):11.10;S22:Phosphorylation (STY):0.00	S170	QSDSNVSSDFVKD	256.451			62.6081	228.577	136.364	Quantified					PF02037(SAP domain);PF13671(AAA domain)
A0A3Q0J7W5	A0A3Q0J7W5|A0A3Q0J7W5_DIACI	S	ADYQIEDSTNTNDFQQSDS(+79.97)NVSSDFVK	19	27	Heterogeneous nuclear ribonucleoprotein U-like protein 2 OS=Diaphorina citri OX=121845 GN=LOC103513904 PE=4 SV=1	Heterogeneous nuclear ribonucleoprotein U-like protein 2	LOC103513904	50.59	3133.27	-4.5	149	175	S19:Phosphorylation (STY):9.40	S167	DFQQSDSNVSSDF	493.48	436.407	549.241	500.384	541.73	396.317	Quantified					PF02037(SAP domain);PF13671(AAA domain)
A0A3Q0J7W5	A0A3Q0J7W5|A0A3Q0J7W5_DIACI	S	ADYQIEDSTNTNDFQQSDSNVS(+79.97)SDFVK	22	27	Heterogeneous nuclear ribonucleoprotein U-like protein 2 OS=Diaphorina citri OX=121845 GN=LOC103513904 PE=4 SV=1	Heterogeneous nuclear ribonucleoprotein U-like protein 2	LOC103513904	33.86	3133.27	-1.4	149	175	S22:Phosphorylation (STY):0.00	S170	QSDSNVSSDFVKD	454.573	641.624	776.094	668.918	67.7513	382.832	Quantified					PF02037(SAP domain);PF13671(AAA domain)
A0A3Q0J7W5	A0A3Q0J7W5|A0A3Q0J7W5_DIACI	S	ADYQIEDSTNTNDFQQSDSNVSS(+79.97)DFVK	23	27	Heterogeneous nuclear ribonucleoprotein U-like protein 2 OS=Diaphorina citri OX=121845 GN=LOC103513904 PE=4 SV=1	Heterogeneous nuclear ribonucleoprotein U-like protein 2	LOC103513904	44.7	3133.27	6.6	149	175	S23:Phosphorylation (STY):0.00	S171	SDSNVSSDFVKDK	454.573	245.302	306.17	283.622	458.688	382.832	Quantified					PF02037(SAP domain);PF13671(AAA domain)
A0A1S3DIE5	A0A1S3DIE5|A0A1S3DIE5_DIACI:A0A1S3CXR6|A0A1S3CXR6_DIACI	S	AEAEELANENNGGGGGADDEDEEDS(+79.97)EGVGDR	25	31	Phosphatidylinositol 5-phosphate 4-kinase type-2 alpha OS=Diaphorina citri OX=121845 GN=LOC103519244 PE=4 SV=1	Phosphatidylinositol 5-phosphate 4-kinase type-2 alpha	LOC103519244	98.04	3186.17	0.6	293	323		S317	DEDEEDSEGVGDR	5731.77	1700.82	3747.4	7761.53	1897.38	5735.05	Quantified	GO:0005524(MF:ATP binding);GO:0016307(MF:phosphatidylinositol phosphate kinase activity)	K00920(NA)	ko00562(Inositol phosphate metabolism);ko04070(Phosphatidylinositol signaling system);ko04810(Regulation of actin cytoskeleton)		PF01504(Phosphatidylinositol-4-phosphate 5-Kinase)
A0A1S4E9U0	A0A1S4E9U0|A0A1S4E9U0_DIACI	S	AEATPSNPS(+79.97)ANESPKKEPVVLATK	9	24	Y-box-binding protein 3 OS=Diaphorina citri OX=121845 GN=LOC103507657 PE=4 SV=1	Y-box-binding protein 3	LOC103507657	36.07	2544.25	-0.8	8	31	S9:Phosphorylation (STY):0.00	S16	ATPSNPSANESPK	3755.02	606.407	425.087	1529.37	8010.23	13170.8	Quantified	GO:0003676(MF:nucleic acid binding)				PF00313('Cold-shock' DNA-binding domain)
A0A1S4E9U0	A0A1S4E9U0|A0A1S4E9U0_DIACI	S	AEATPSNPSANES(+79.97)PKKEPVVLATK	13	24	Y-box-binding protein 3 OS=Diaphorina citri OX=121845 GN=LOC103507657 PE=4 SV=1	Y-box-binding protein 3	LOC103507657	56.55	2544.25	0.8	8	31	S13:Phosphorylation (STY):5.55	S20	NPSANESPKKEPV	38167.3	35683.2	21618.2	74058.7	38018.8	52649	Quantified	GO:0003676(MF:nucleic acid binding)				PF00313('Cold-shock' DNA-binding domain)
A0A3Q0IP49	A0A3Q0IP49|A0A3Q0IP49_DIACI	S	AEEPWLNSSSDPVS(+79.97)PSPATPQQK	14	23	Uncharacterized protein LOC103504859 OS=Diaphorina citri OX=121845 GN=LOC103504859 PE=4 SV=1	Uncharacterized protein LOC103504859	LOC103504859	35.58	2531.12	0	6	28	S14:Phosphorylation (STY):6.65	S19	SSSDPVSPSPATP	119.682	84.5967	644.197	697.9	408.662	486.874	Quantified	GO:0003676(MF:nucleic acid binding)
A0A1S3D116	A0A1S3D116|A0A1S3D116_DIACI	S	AEES(+79.97)AAET(+79.97)AEGPAAGAPAEK	4	20	Flightin OS=Diaphorina citri OX=121845 GN=LOC103508322 PE=4 SV=1	Flightin	LOC103508322	61.08	2015.78	1.9	20	39		S23	EPKAEESAAETAE	2222.85	2305.69	3761.06	1347.12	720.781	511.008	Quantified
A0A1S3D116	A0A1S3D116|A0A1S3D116_DIACI	T	AEES(+79.97)AAET(+79.97)AEGPAAGAPAEK	8	20	Flightin OS=Diaphorina citri OX=121845 GN=LOC103508322 PE=4 SV=1	Flightin	LOC103508322	61.08	2015.78	1.9	20	39		T27	EESAAETAEGPAA	2222.85	2305.69	3761.06	1347.12	720.781	511.008	Quantified
A0A1S3D116	A0A1S3D116|A0A1S3D116_DIACI	S	AEES(+79.97)AAETAEGPAAGAPAEK	4	20	Flightin OS=Diaphorina citri OX=121845 GN=LOC103508322 PE=4 SV=1	Flightin	LOC103508322	80.62	1935.81	2.9	20	39	S4:Phosphorylation (STY):111.84	S23	EPKAEESAAETAE	225166	230446	205745	316694	230041	135096	Quantified
A0A1S3D116	A0A1S3D116|A0A1S3D116_DIACI	T	AEESAAET(+79.97)AEGPAAGAPAEK	8	20	Flightin OS=Diaphorina citri OX=121845 GN=LOC103508322 PE=4 SV=1	Flightin	LOC103508322	69.85	1935.81	-7.7	20	39	T8:Phosphorylation (STY):52.86	T27	EESAAETAEGPAA	1443.74	2398.38	968.499	1123.48	154.636	2391.47	Quantified
A0A3Q0IR07	A0A3Q0IR07|A0A3Q0IR07_DIACI:A0A3Q0IR16|A0A3Q0IR16_DIACI:A0A3Q0IR26|A0A3Q0IR26_DIACI	S	AEESFS(+79.97)EK	6	8	Uncharacterized protein LOC103508110 isoform X1 OS=Diaphorina citri OX=121845 GN=LOC103508110 PE=4 SV=1	Uncharacterized protein LOC103508110 isoform X1	LOC103508110	42.94	1005.37	-1.5	185	192	S6:Phosphorylation (STY):33.18	S190	KAEESFSEKSHNL			275.213	476.609	2603.07	379.985	Quantified
A0A3Q0IR07	A0A3Q0IR07|A0A3Q0IR07_DIACI:A0A3Q0IR16|A0A3Q0IR16_DIACI:A0A3Q0IR26|A0A3Q0IR26_DIACI	S	AEESFS(+79.97)EKS(+79.97)HNLR	6	13	Uncharacterized protein LOC103508110 isoform X1 OS=Diaphorina citri OX=121845 GN=LOC103508110 PE=4 SV=1	Uncharacterized protein LOC103508110 isoform X1	LOC103508110	41.62	1692.65	-0.8	185	197	S6:Phosphorylation (STY):22.85;S9:Phosphorylation (STY):14.62	S190	KAEESFSEKSHNL	21017	25305.7	28916.2	16358.6	17516.7	14936.3	Quantified
A0A3Q0IR07	A0A3Q0IR07|A0A3Q0IR07_DIACI:A0A3Q0IR16|A0A3Q0IR16_DIACI:A0A3Q0IR26|A0A3Q0IR26_DIACI	S	AEESFS(+79.97)EKS(+79.97)HNLR	9	13	Uncharacterized protein LOC103508110 isoform X1 OS=Diaphorina citri OX=121845 GN=LOC103508110 PE=4 SV=1	Uncharacterized protein LOC103508110 isoform X1	LOC103508110	41.62	1692.65	-0.8	185	197	S6:Phosphorylation (STY):22.85;S9:Phosphorylation (STY):14.62	S193	ESFSEKSHNLRQK	21017	25305.7	28916.2	16358.6	17516.7	14936.3	Quantified
A0A3Q0JNM5	A0A3Q0JNM5|A0A3Q0JNM5_DIACI:A0A3Q0JJ52|A0A3Q0JJ52_DIACI:A0A3Q0JJ46|A0A3Q0JJ46_DIACI:A0A3Q0JJ42|A0A3Q0JJ42_DIACI:A0A1S4ENA8|A0A1S4ENA8_DIACI	S	AEETLGEDGVS(+79.97)HGK	11	14	Variant-silencing SET domain-containing protein isoform X2 OS=Diaphorina citri OX=121845 GN=LOC103522493 PE=4 SV=1	Variant-silencing SET domain-containing protein isoform X2	LOC103522493	37.58	1507.62	4.1	259	272	S11:Phosphorylation (STY):38.97	S269	LGEDGVSHGKADL	468.618	242.892	429.83		1128.05	146.537	Quantified
A0A3Q0J0S0	A0A3Q0J0S0|A0A3Q0J0S0_DIACI	S	AEILS(+79.97)LC(+57.02)DEVDR	5	12	Vinculin OS=Diaphorina citri OX=121845 GN=LOC103510787 PE=3 SV=1	Vinculin	LOC103510787	61.27	1498.64	0.8	416	427	C7:Carbamidomethylation:1000.00	S420	QRAEILSLCDEVD	1718.8	1372.1	1499.23	1795.47	1706.37	1515.48	Quantified	GO:0007155(BP:cell adhesion);GO:0051015(MF:actin filament binding)	K05700(NA)	ko04510(Focal adhesion);ko04520(Adherens junction);ko04810(Regulation of actin cytoskeleton)		PF01044(Vinculin family)
A0A1S3D5Q7	A0A1S3D5Q7|A0A1S3D5Q7_DIACI	S	AELEETSS(+79.97)PPLVASR	8	15	Transcription factor Ken-like OS=Diaphorina citri OX=121845 GN=LOC103511863 PE=4 SV=2	Transcription factor Ken-like	LOC103511863	63.57	1664.77	2.7	17	31	S8:Phosphorylation (STY):11.06	S24	ELEETSSPPLVAS	431.778	314.345	987.104	204.548	837.964	912.88	Quantified	GO:0003676(MF:nucleic acid binding)				PF00096(Zinc finger, C2H2 type)
A0A1S3DHZ5	A0A1S3DHZ5|A0A1S3DHZ5_DIACI	S	AELLEGS(+79.97)DDDSQNNEELEK	7	19	Uncharacterized protein LOC103518745 OS=Diaphorina citri OX=121845 GN=LOC103518745 PE=4 SV=1	Uncharacterized protein LOC103518745	LOC103518745	47.82	2213.88	-0.6	442	460	S7:Phosphorylation (STY):0.00	S448	AELLEGSDDDSQN	1965.67	456.926	2199.68	4873.68	1891.56	3266.93	Quantified	GO:0003676(MF:nucleic acid binding)				PF01585(G-patch domain)
A0A3Q0JE46	A0A3Q0JE46|A0A3Q0JE46_DIACI:A0A3Q0J881|A0A3Q0J881_DIACI:A0A3Q0JCB6|A0A3Q0JCB6_DIACI	S	AELPPPLPQS(+79.97)PPPTEVPPPT(+79.97)PTPVEEK	10	27	Uncharacterized protein LOC103519410 OS=Diaphorina citri OX=121845 GN=LOC103519410 PE=4 SV=1	Uncharacterized protein LOC103519410	LOC103519410	50.12	3000.42	2.5	66	92	S10:Phosphorylation (STY):0.00;T20:Phosphorylation (STY):5.03	S75	PPPLPQSPPPTEV	5778.51	191.768	2515.97	3160.8	100.316	305.493	Quantified
A0A3Q0JE46	A0A3Q0JE46|A0A3Q0JE46_DIACI:A0A3Q0J881|A0A3Q0J881_DIACI:A0A3Q0JCB6|A0A3Q0JCB6_DIACI	T	AELPPPLPQS(+79.97)PPPTEVPPPT(+79.97)PTPVEEK	20	27	Uncharacterized protein LOC103519410 OS=Diaphorina citri OX=121845 GN=LOC103519410 PE=4 SV=1	Uncharacterized protein LOC103519410	LOC103519410	50.12	3000.42	2.5	66	92	S10:Phosphorylation (STY):0.00;T20:Phosphorylation (STY):5.03	T85	TEVPPPTPTPVEE	5778.51	191.768	2515.97	3160.8	100.316	305.493	Quantified
A0A3Q0JE46	A0A3Q0JE46|A0A3Q0JE46_DIACI:A0A3Q0J881|A0A3Q0J881_DIACI:A0A3Q0JCB6|A0A3Q0JCB6_DIACI	S	AELPPPLPQS(+79.97)PPPTEVPPPTPT(+79.97)PVEEK	10	27	Uncharacterized protein LOC103519410 OS=Diaphorina citri OX=121845 GN=LOC103519410 PE=4 SV=1	Uncharacterized protein LOC103519410	LOC103519410	29.67	3000.42	2.9	66	92	S10:Phosphorylation (STY):11.12;T22:Phosphorylation (STY):0.00	S75	PPPLPQSPPPTEV	210.743	191.768	144.659	184.138	211.328	305.493	Quantified
A0A3Q0JE46	A0A3Q0JE46|A0A3Q0JE46_DIACI:A0A3Q0J881|A0A3Q0J881_DIACI:A0A3Q0JCB6|A0A3Q0JCB6_DIACI	T	AELPPPLPQS(+79.97)PPPTEVPPPTPT(+79.97)PVEEK	22	27	Uncharacterized protein LOC103519410 OS=Diaphorina citri OX=121845 GN=LOC103519410 PE=4 SV=1	Uncharacterized protein LOC103519410	LOC103519410	29.67	3000.42	2.9	66	92	S10:Phosphorylation (STY):11.12;T22:Phosphorylation (STY):0.00	T87	VPPPTPTPVEEKK	210.743	191.768	144.659	184.138	211.328	305.493	Quantified
A0A3Q0JE46	A0A3Q0JE46|A0A3Q0JE46_DIACI:A0A3Q0J881|A0A3Q0J881_DIACI:A0A3Q0JCB6|A0A3Q0JCB6_DIACI	S	AELPPPLPQS(+79.97)PPPTEVPPPTPTPVEEK	10	27	Uncharacterized protein LOC103519410 OS=Diaphorina citri OX=121845 GN=LOC103519410 PE=4 SV=1	Uncharacterized protein LOC103519410	LOC103519410	64.85	2920.45	-3	66	92	S10:Phosphorylation (STY):6.65	S75	PPPLPQSPPPTEV	76819.6	37340.4	22871.3	77041.5	24036.1	36056.1	Quantified
A0A3Q0JE46	A0A3Q0JE46|A0A3Q0JE46_DIACI:A0A3Q0J881|A0A3Q0J881_DIACI:A0A3Q0JCB6|A0A3Q0JCB6_DIACI	T	AELPPPLPQSPPPT(+79.97)EVPPPTPTPVEEK	14	27	Uncharacterized protein LOC103519410 OS=Diaphorina citri OX=121845 GN=LOC103519410 PE=4 SV=1	Uncharacterized protein LOC103519410	LOC103519410	53.63	2920.45	0.4	66	92	T14:Phosphorylation (STY):0.00	T79	PQSPPPTEVPPPT	2425.84	1101.12	560.42	3621.02	3049.69	1975.59	Quantified
A0A3Q0JE46	A0A3Q0JE46|A0A3Q0JE46_DIACI:A0A3Q0J881|A0A3Q0J881_DIACI:A0A3Q0JCB6|A0A3Q0JCB6_DIACI	T	AELPPPLPQSPPPTEVPPPT(+79.97)PTPVEEK	20	27	Uncharacterized protein LOC103519410 OS=Diaphorina citri OX=121845 GN=LOC103519410 PE=4 SV=1	Uncharacterized protein LOC103519410	LOC103519410	67.82	2920.45	5.3	66	92	T20:Phosphorylation (STY):11.10	T85	TEVPPPTPTPVEE	18783.2	50693	28460.5	22216.8	7215.66	10042.4	Quantified
A0A3Q0JE46	A0A3Q0JE46|A0A3Q0JE46_DIACI:A0A3Q0J881|A0A3Q0J881_DIACI:A0A3Q0JCB6|A0A3Q0JCB6_DIACI	T	AELPPPLPQSPPPTEVPPPTPT(+79.97)PVEEK	22	27	Uncharacterized protein LOC103519410 OS=Diaphorina citri OX=121845 GN=LOC103519410 PE=4 SV=1	Uncharacterized protein LOC103519410	LOC103519410	60.17	2920.45	2.5	66	92	T22:Phosphorylation (STY):0.00	T87	VPPPTPTPVEEKK	3187.01	4568.01	5271.39	545.399	1995.06	730.849	Quantified
A0A2U8ZUM7	A0A2U8ZUM7|A0A2U8ZUM7_DIACI:A0A1S4EQX9|A0A1S4EQX9_DIACI:A0A2U8ZUL4|A0A2U8ZUL4_DIACI:A0A1S4EQH5|A0A1S4EQH5_DIACI	T	AEM(+15.99)T(+79.97)C(+57.02)DGC(+57.02)SSAITR	4	14	Copper transport protein OS=Diaphorina citri OX=121845 GN=ATOX1 PE=4 SV=1	Copper transport protein	ATOX1	56.5	1653.58	0.8	9	22	M3:Oxidation (M):1000.00;T4:Phosphorylation (STY):51.00;C5:Carbamidomethylation:1000.00;C8:Carbamidomethylation:1000.00	T12	VFKAEMTCDGCSS	388.112	486.939	681.187	272.851	198.129	324.811	Quantified	GO:0030001(BP:metal ion transport);GO:0046872(MF:metal ion binding)				PF00403(Heavy-metal-associated domain)
A0A2U8ZUM7	A0A2U8ZUM7|A0A2U8ZUM7_DIACI:A0A1S4EQX9|A0A1S4EQX9_DIACI:A0A2U8ZUL4|A0A2U8ZUL4_DIACI:A0A1S4EQH5|A0A1S4EQH5_DIACI	T	AEMT(+79.97)C(+57.02)DGC(+57.02)SSAITR	4	14	Copper transport protein OS=Diaphorina citri OX=121845 GN=ATOX1 PE=4 SV=1	Copper transport protein	ATOX1	75.59	1637.59	-0.2	9	22	T4:Phosphorylation (STY):30.64;C5:Carbamidomethylation:1000.00;C8:Carbamidomethylation:1000.00	T12	VFKAEMTCDGCSS	3470.22	5133.23	4018.14	680.36	4752.96	1772.04	Quantified	GO:0030001(BP:metal ion transport);GO:0046872(MF:metal ion binding)				PF00403(Heavy-metal-associated domain)
A0A3Q0J4F9	A0A3Q0J4F9|A0A3Q0J4F9_DIACI	S	AENLHS(+79.97)PDHKPLEEPQVLDAK	6	21	Tau-tubulin kinase homolog Asator OS=Diaphorina citri OX=121845 GN=LOC108252791 PE=4 SV=1	Tau-tubulin kinase homolog Asator	LOC108252791	63.63	2446.15	-0.8	340	360		S345	RAENLHSPDHKPL	22082.7	43577	21082.5	14834.8	3139.28	18551.6	Quantified	GO:0016301(MF:kinase activity)
A0A3Q0J0B8	A0A3Q0J0B8|A0A3Q0J0B8_DIACI:A0A1S4EFF8|A0A1S4EFF8_DIACI	S	AENQYGVSEPLELDNS(+79.97)ITAK	16	20	Twitchin-like OS=Diaphorina citri OX=121845 GN=LOC103512724 PE=3 SV=1	Twitchin-like	LOC103512724	27.32	2257.02	1.8	87	106	S16:Phosphorylation (STY):0.00	S102	PLELDNSITAKFP	690.464	909.981	199.648	718.763	605.434	546.418	Quantified	GO:0005524(MF:ATP binding);GO:0004672(MF:protein kinase activity)				PF00041(Fibronectin type III domain);PF00069(Protein kinase domain);PF07679(Immunoglobulin I-set domain)
A0A678X7J0	A0A678X7J0|A0A678X7J0_DIACI	S	AEPEPLAPLPPRPNPVANQLS(+79.97)PK	21	23	Wings apart-like protein OS=Diaphorina citri OX=121845 PE=2 SV=1	Wings apart-like protein		46.89	2511.29	-2.7	121	143		S141	PVANQLSPKFTPE	1761.88	2381.15	2603.08	3360.36	424.11	1011.82	Quantified					PF07814(Wings apart-like protein regulation of heterochromatin)
A0A3Q0IW39	A0A3Q0IW39|A0A3Q0IW39_DIACI:A0A1S4EPW6|A0A1S4EPW6_DIACI	S	AEPNSQPQAS(+79.97)P	10	11	Protein croquemort OS=Diaphorina citri OX=121845 GN=LOC103510702 PE=3 SV=1	Protein croquemort	LOC103510702	37.16	1204.48	-1.9	410	420	S10:Phosphorylation (STY):53.98	S419	NSQPQASP_____	1177.52	1822.98	3763.79	5670.82	2300.8	117.15	Quantified	GO:0016021(CC:integral component of membrane)				PF01130(CD36 family)
A0A3Q0JAM5	A0A3Q0JAM5|A0A3Q0JAM5_DIACI	S	AES(+79.97)EPNLSTLAAPPEES	3	17	Transmembrane anterior posterior transformation protein 1 homolog OS=Diaphorina citri OX=121845 GN=LOC103517670 PE=3 SV=1	Transmembrane anterior posterior transformation protein 1 homolog	LOC103517670	47.19	1820.77	5.6	297	313	S3:Phosphorylation (STY):22.36	S299	MFKRAESEPNLST	531.694	1631.77	192.45	538.407	302.075	1162.48	Quantified	GO:0016021(CC:integral component of membrane)			Membrane;Multi-pass membrane protein	PF05346(Eukaryotic membrane protein family)
A0A1S4EQD9	A0A1S4EQD9|A0A1S4EQD9_DIACI:A0A3Q0J2K4|A0A3Q0J2K4_DIACI	S	AES(+79.97)LGPVDELMGDVQAIAGGK	3	21	Alpha-methyldopa hypersensitive protein-like OS=Diaphorina citri OX=121845 GN=LOC103521832 PE=3 SV=1	Alpha-methyldopa hypersensitive protein-like	LOC103521832	38.68	2135.98	2.9	197	217		S199	PVARAESLGPVDE	137.48	403.3	101.944		231.003	119.415	Quantified	GO:0006520(BP:cellular amino acid metabolic process);GO:0016831(MF:carboxy-lyase activity);GO:0030170(MF:pyridoxal phosphate binding)				PF00282(Pyridoxal-dependent decarboxylase conserved domain)
A0A3Q0IRC5	A0A3Q0IRC5|A0A3Q0IRC5_DIACI	S	AES(+79.97)VKEISYNK	3	11	Lipid storage droplets surface-binding protein 1-like OS=Diaphorina citri OX=121845 GN=LOC103508445 PE=4 SV=1	Lipid storage droplets surface-binding protein 1-like	LOC103508445	60.53	1346.61	-1.5	178	188	S3:Phosphorylation (STY):81.69	S180	MIKRAESVKEISY	7994.14	643.299	12393	2007.96	7199.85	8444.47	Quantified
A0A1S3D683	A0A1S3D683|A0A1S3D683_DIACI	S	AES(+79.97)VPGADQPTTEADEAAK	3	19	Plasminogen activator inhibitor 1 RNA-binding protein OS=Diaphorina citri OX=121845 GN=LOC103511418 PE=4 SV=1	Plasminogen activator inhibitor 1 RNA-binding protein	LOC103511418	73.78	1965.82	1.3	102	120	S3:Phosphorylation (STY):97.31	S104	NPEKAESVPGADQ	74083.9	61953.2	53781.1	149395	41200.2	56136	Quantified	GO:0003723(MF:RNA binding)				PF04774(Hyaluronan / mRNA binding family)
A0A1S4ECU0	A0A1S4ECU0|A0A1S4ECU0_DIACI	T	AEVTT(+79.97)PEGTESPK	5	13	ATP synthase subunit gamma OS=Diaphorina citri OX=121845 GN=LOC103510009 PE=3 SV=1	ATP synthase subunit gamma	LOC103510009	34.67	1424.61	-5.9	75	87	T5:Phosphorylation (STY):14.19	T79	SKAEVTTPEGTES	676.544	225.681	461.864	105.736	1537.38	1016.2	Quantified	GO:0015986(BP:ATP synthesis coupled proton transport);GO:0045261(CC:proton-transporting ATP synthase complex, catalytic core F(1));GO:0046933(MF:proton-transporting ATP synthase activity, rotational mechanism)	K02136(NA)	ko00190(Oxidative phosphorylation)		PF00231(ATP synthase)
A0A1S4ECU0	A0A1S4ECU0|A0A1S4ECU0_DIACI	T	AEVTTPEGT(+79.97)ESPK	9	13	ATP synthase subunit gamma OS=Diaphorina citri OX=121845 GN=LOC103510009 PE=3 SV=1	ATP synthase subunit gamma	LOC103510009	47.82	1424.61	2.7	75	87	T9:Phosphorylation (STY):0.00	T83	VTTPEGTESPKEL	653.219	2597.62	3720.86	2097.41	2874.54	1933.42	Quantified	GO:0015986(BP:ATP synthesis coupled proton transport);GO:0045261(CC:proton-transporting ATP synthase complex, catalytic core F(1));GO:0046933(MF:proton-transporting ATP synthase activity, rotational mechanism)	K02136(NA)	ko00190(Oxidative phosphorylation)		PF00231(ATP synthase)
A0A1S4ECU0	A0A1S4ECU0|A0A1S4ECU0_DIACI	S	AEVTTPEGTES(+79.97)PK	11	13	ATP synthase subunit gamma OS=Diaphorina citri OX=121845 GN=LOC103510009 PE=3 SV=1	ATP synthase subunit gamma	LOC103510009	54.96	1424.61	3.7	75	87	S11:Phosphorylation (STY):0.00	S85	TPEGTESPKELLI	653.219	1114.31	2539.69	2097.41	2319.57	1933.42	Quantified	GO:0015986(BP:ATP synthesis coupled proton transport);GO:0045261(CC:proton-transporting ATP synthase complex, catalytic core F(1));GO:0046933(MF:proton-transporting ATP synthase activity, rotational mechanism)	K02136(NA)	ko00190(Oxidative phosphorylation)		PF00231(ATP synthase)
A0A1S4ECU0	A0A1S4ECU0|A0A1S4ECU0_DIACI	S	AEVTTPEGTES(+79.97)PKELLIAVTSDR	11	23	ATP synthase subunit gamma OS=Diaphorina citri OX=121845 GN=LOC103510009 PE=3 SV=1	ATP synthase subunit gamma	LOC103510009	39.47	2522.22	-7.5	75	97	S11:Phosphorylation (STY):0.00	S85	TPEGTESPKELLI	377.14	370.246	257.584		566.774	440.421	Quantified	GO:0015986(BP:ATP synthesis coupled proton transport);GO:0045261(CC:proton-transporting ATP synthase complex, catalytic core F(1));GO:0046933(MF:proton-transporting ATP synthase activity, rotational mechanism)	K02136(NA)	ko00190(Oxidative phosphorylation)		PF00231(ATP synthase)
A0A3Q0IPJ2	A0A3Q0IPJ2|A0A3Q0IPJ2_DIACI	S	AEVTTS(+79.97)DGSEVLSSR	6	15	LOW QUALITY PROTEIN: obscurin-like OS=Diaphorina citri OX=121845 GN=LOC103507575 PE=3 SV=1	LOW QUALITY PROTEIN: obscurin-like	LOC103507575	47.08	1616.69	0.2	2364	2378	S6:Phosphorylation (STY):0.00	S2369	RAEVTTSDGSEVL	520.902	610.68	146.012	295.272	537.31	224.436	Quantified	GO:0005524(MF:ATP binding);GO:0005085(MF:guanyl-nucleotide exchange factor activity);GO:0004672(MF:protein kinase activity)				PF00621(RhoGEF domain);PF00069(Protein kinase domain);PF00041(Fibronectin type III domain);PF07679(Immunoglobulin I-set domain)
A0A3Q0IPJ2	A0A3Q0IPJ2|A0A3Q0IPJ2_DIACI	S	AEVTTSDGSEVLS(+79.97)SR	13	15	LOW QUALITY PROTEIN: obscurin-like OS=Diaphorina citri OX=121845 GN=LOC103507575 PE=3 SV=1	LOW QUALITY PROTEIN: obscurin-like	LOC103507575	55.28	1616.69	2.2	2364	2378	S13:Phosphorylation (STY):0.00	S2376	DGSEVLSSRNSSR	190.753	65.7656	3704.69	686.85	85.74	58.0309	Quantified	GO:0005524(MF:ATP binding);GO:0005085(MF:guanyl-nucleotide exchange factor activity);GO:0004672(MF:protein kinase activity)				PF00621(RhoGEF domain);PF00069(Protein kinase domain);PF00041(Fibronectin type III domain);PF07679(Immunoglobulin I-set domain)
A0A1S4E6C4	A0A1S4E6C4|A0A1S4E6C4_DIACI	S	AFAGTGHTLGS(+79.97)PVPTAIGQTK	11	21	NSFL1 cofactor p47-like OS=Diaphorina citri OX=121845 GN=LOC103505114 PE=4 SV=2	NSFL1 cofactor p47-like	LOC103505114	60.24	2090.02	2.9	151	171	S11:Phosphorylation (STY):11.12	S161	TGHTLGSPVPTAI	3896.79	3197.01	3615.17	809.376	779.981	892.234	Quantified					PF08059(SEP domain)
A0A1S3DHW2	A0A1S3DHW2|A0A1S3DHW2_DIACI	S	AFATFTVTPGKDEYDDLS(+79.97)DLNPAEWESVR	18	29	Membrane-associated progesterone receptor component 1-like OS=Diaphorina citri OX=121845 GN=LOC103518682 PE=4 SV=1	Membrane-associated progesterone receptor component 1-like	LOC103518682	42.92	3352.48	1.5	115	143	S18:Phosphorylation (STY):0.00	S132	DEYDDLSDLNPAE		622.577	124.357		553.786	232.459	Quantified	GO:0016021(CC:integral component of membrane)	K17278(NA)	ko04080(Neuroactive ligand-receptor interaction)		PF00173(Cytochrome b5-like Heme/Steroid binding domain)
A0A1S4EQL5	A0A1S4EQL5|A0A1S4EQL5_DIACI:A0A1S4EG44|A0A1S4EG44_DIACI	S	AFFS(+79.97)HENNLNNHIVEHM(+15.99)K	4	18	Uncharacterized protein LOC103522180 OS=Diaphorina citri OX=121845 GN=LOC103522180 PE=4 SV=1	Uncharacterized protein LOC103522180	LOC103522180	41.89	2275.98	1.6	134	151		S137	GTRAFFSHENNLN	2344.64	4176.12	1677.18	2303.46	2290.9	3045.3	Quantified
A0A1S4EQL5	A0A1S4EQL5|A0A1S4EQL5_DIACI:A0A1S4EG44|A0A1S4EG44_DIACI	S	AFFS(+79.97)HENNLNNHIVEHMK	4	18	Uncharacterized protein LOC103522180 OS=Diaphorina citri OX=121845 GN=LOC103522180 PE=4 SV=1	Uncharacterized protein LOC103522180	LOC103522180	46.54	2259.99	-2.3	134	151		S137	GTRAFFSHENNLN	3974.68	11274.4	4808.19	2588.28	9447.96	8045.44	Quantified
A0A3Q0IVR9	A0A3Q0IVR9|A0A3Q0IVR9_DIACI	S	AFHQETLDDGVDSDDSS(+79.97)S(+79.97)SEGDEGVSPK	17	28	Inositol 1,4,5-trisphosphate receptor OS=Diaphorina citri OX=121845 GN=LOC103507937 PE=3 SV=1	Inositol 1,4,5-trisphosphate receptor	LOC103507937	38.02	3069.13	-1.2	2023	2050	S17:Phosphorylation (STY):0.00;S18:Phosphorylation (STY):0.00	S2039	VDSDDSSSSEGDE	178.158	140.969	124.778	207.296	294.755	184.75	Quantified	GO:0005783(CC:endoplasmic reticulum);GO:0016021(CC:integral component of membrane);GO:0070679(MF:inositol 1,4,5 trisphosphate binding);GO:0005220(MF:inositol 1,4,5-trisphosphate-sensitive calcium-release channel activity)			Endoplasmic reticulum membrane;Multi-pass membrane protein;Membrane	PF08709(Inositol 1,4,5-trisphosphate/ryanodine receptor);PF02815(MIR domain);PF08454(RyR and IP3R Homology associated);PF01365(RIH domain)
A0A3Q0IVR9	A0A3Q0IVR9|A0A3Q0IVR9_DIACI	S	AFHQETLDDGVDSDDSS(+79.97)S(+79.97)SEGDEGVSPK	18	28	Inositol 1,4,5-trisphosphate receptor OS=Diaphorina citri OX=121845 GN=LOC103507937 PE=3 SV=1	Inositol 1,4,5-trisphosphate receptor	LOC103507937	38.02	3069.13	-1.2	2023	2050	S17:Phosphorylation (STY):0.00;S18:Phosphorylation (STY):0.00	S2040	DSDDSSSSEGDEG	178.158	140.969	124.778	207.296	294.755	184.75	Quantified	GO:0005783(CC:endoplasmic reticulum);GO:0016021(CC:integral component of membrane);GO:0070679(MF:inositol 1,4,5 trisphosphate binding);GO:0005220(MF:inositol 1,4,5-trisphosphate-sensitive calcium-release channel activity)			Endoplasmic reticulum membrane;Multi-pass membrane protein;Membrane	PF08709(Inositol 1,4,5-trisphosphate/ryanodine receptor);PF02815(MIR domain);PF08454(RyR and IP3R Homology associated);PF01365(RIH domain)
A0A3Q0IVR9	A0A3Q0IVR9|A0A3Q0IVR9_DIACI	S	AFHQETLDDGVDSDDSS(+79.97)SSEGDEGVSPK	17	28	Inositol 1,4,5-trisphosphate receptor OS=Diaphorina citri OX=121845 GN=LOC103507937 PE=3 SV=1	Inositol 1,4,5-trisphosphate receptor	LOC103507937	47.33	2989.16	-3	2023	2050	S17:Phosphorylation (STY):0.00	S2039	VDSDDSSSSEGDE	161.034	248.246	795.436	1164.32	1409.41	1620.43	Quantified	GO:0005783(CC:endoplasmic reticulum);GO:0016021(CC:integral component of membrane);GO:0070679(MF:inositol 1,4,5 trisphosphate binding);GO:0005220(MF:inositol 1,4,5-trisphosphate-sensitive calcium-release channel activity)			Endoplasmic reticulum membrane;Multi-pass membrane protein;Membrane	PF08709(Inositol 1,4,5-trisphosphate/ryanodine receptor);PF02815(MIR domain);PF08454(RyR and IP3R Homology associated);PF01365(RIH domain)
A0A3Q0IVR9	A0A3Q0IVR9|A0A3Q0IVR9_DIACI	S	AFHQETLDDGVDSDDSSSS(+79.97)EGDEGVSPK	19	28	Inositol 1,4,5-trisphosphate receptor OS=Diaphorina citri OX=121845 GN=LOC103507937 PE=3 SV=1	Inositol 1,4,5-trisphosphate receptor	LOC103507937	37.78	2989.16	3.7	2023	2050	S19:Phosphorylation (STY):0.00	S2041	SDDSSSSEGDEGV	1411.45	1110.45	2292.38	1164.32	2583.71	173.034	Quantified	GO:0005783(CC:endoplasmic reticulum);GO:0016021(CC:integral component of membrane);GO:0070679(MF:inositol 1,4,5 trisphosphate binding);GO:0005220(MF:inositol 1,4,5-trisphosphate-sensitive calcium-release channel activity)			Endoplasmic reticulum membrane;Multi-pass membrane protein;Membrane	PF08709(Inositol 1,4,5-trisphosphate/ryanodine receptor);PF02815(MIR domain);PF08454(RyR and IP3R Homology associated);PF01365(RIH domain)
A0A3Q0JHV6	A0A3Q0JHV6|A0A3Q0JHV6_DIACI	S	AFIEVNEEGTEAAAATVVDVIAASS(+79.97)PELEPTKPR	25	34	Antichymotrypsin-2 isoform X5 OS=Diaphorina citri OX=121845 GN=LOC103518206 PE=3 SV=1	Antichymotrypsin-2 isoform X5	LOC103518206	49.21	3590.74	1.8	307	340	S25:Phosphorylation (STY):0.00	S331	DVIAASSPELEPT		193.492	68.8079		224.43		Quantified	GO:0005615(CC:extracellular space)				PF00079(Serpin (serine protease inhibitor))
A0A1S4ERF4	A0A1S4ERF4|A0A1S4ERF4_DIACI	S	AFKS(+79.97)NLEDLEER	4	12	Calcium-transporting ATPase OS=Diaphorina citri OX=121845 GN=LOC103523657 PE=3 SV=1	Calcium-transporting ATPase	LOC103523657	57.32	1529.68	2.9	1065	1076		S1068	VIRAFKSNLEDLE	2805.07	2655.31	399.811	6803.65	2828.7	3547.56	Quantified	GO:0016021(CC:integral component of membrane);GO:0005524(MF:ATP binding);GO:0005388(MF:calcium-transporting ATPase activity)	K05850(NA)	ko04020(Calcium signaling pathway);ko04022(cGMP-PKG signaling pathway);ko04024(cAMP signaling pathway)	Membrane;Multi-pass membrane protein	PF12424(Plasma membrane calcium transporter ATPase C terminal);PF00690(Cation transporter/ATPase, N-terminus);PF13246(Cation transport ATPase (P-type));PF00122(E1-E2 ATPase);PF00689(Cation transporting ATPase, C-terminus)
A0A3Q0IVK3	A0A3Q0IVK3|A0A3Q0IVK3_DIACI	S	AFS(+79.97)QGQIIDTVRPNLTK	3	17	Phospholipid-transporting ATPase OS=Diaphorina citri OX=121845 GN=LOC103510070 PE=3 SV=1	Phospholipid-transporting ATPase	LOC103510070	25.18	1966.99	4.4	70	86	S3:Phosphorylation (STY):8.15	S72	GHQRAFSQGQIID	646.031	681.665	699.353	337.474	316.776	468.044	Quantified	GO:0015914(BP:phospholipid transport);GO:0016021(CC:integral component of membrane);GO:0005524(MF:ATP binding);GO:0000287(MF:magnesium ion binding);GO:0140326(NA:NA)			Membrane;Multi-pass membrane protein	PF16212(Phospholipid-translocating P-type ATPase C-terminal);PF16209(Phospholipid-translocating ATPase N-terminal);PF13246(Cation transport ATPase (P-type));PF00122(E1-E2 ATPase)
A0A3Q0IJE5	A0A3Q0IJE5|A0A3Q0IJE5_DIACI	T	AFT(+79.97)PPPTTITLRPEPPISQLPPPVFVSQPATATM(+15.99)QGGK	3	38	Pollen-specific leucine-rich repeat extensin-like protein 2 OS=Diaphorina citri OX=121845 GN=LOC103505110 PE=4 SV=1	Pollen-specific leucine-rich repeat extensin-like protein 2	LOC103505110	80.17	4065.07	4	99	136	T3:Phosphorylation (STY):42.89;M34:Oxidation (M):1000.00	T101	TPTRAFTPPPTTI	45800.2	168965	67459.7	29826.3	131604	67181.2	Quantified
A0A3Q0IJE5	A0A3Q0IJE5|A0A3Q0IJE5_DIACI	T	AFT(+79.97)PPPTTITLRPEPPISQLPPPVFVSQPATATMQGGK	3	38	Pollen-specific leucine-rich repeat extensin-like protein 2 OS=Diaphorina citri OX=121845 GN=LOC103505110 PE=4 SV=1	Pollen-specific leucine-rich repeat extensin-like protein 2	LOC103505110	80.15	4049.07	-2	99	136	T3:Phosphorylation (STY):8.26	T101	TPTRAFTPPPTTI	174619	540922	118922	32025.1	306110	117097	Quantified
A0A3Q0JAB0	A0A3Q0JAB0|A0A3Q0JAB0_DIACI	S	AFTLS(+79.97)ALDNHK	5	11	BOS complex subunit NCLN OS=Diaphorina citri OX=121845 GN=LOC103517475 PE=3 SV=1	BOS complex subunit NCLN	LOC103517475	26.48	1295.59	-16.3	363	373	S5:Phosphorylation (STY):54.01	S367	HRAFTLSALDNHK	746.521	408.725	1191.67	7253.07	334.228	2868.59	Quantified	GO:0009966(BP:regulation of signal transduction);GO:0016021(CC:integral component of membrane)				PF04389(Peptidase family M28)
A0A3Q0IJE5	A0A3Q0IJE5|A0A3Q0IJE5_DIACI	T	AFTPPPT(+79.97)TITLRPEPPISQLPPPVFVSQPATATM(+15.99)QGGK	7	38	Pollen-specific leucine-rich repeat extensin-like protein 2 OS=Diaphorina citri OX=121845 GN=LOC103505110 PE=4 SV=1	Pollen-specific leucine-rich repeat extensin-like protein 2	LOC103505110	49.18	4065.07	-5.9	99	136	T7:Phosphorylation (STY):0.00;M34:Oxidation (M):1000.00	T105	AFTPPPTTITLRP	291.451	20567.2	67459.7	5413.98	2230.16	1210.05	Quantified
A0A1S4ESL6	A0A1S4ESL6|A0A1S4ESL6_DIACI	S	AFYAPPGHDS(+79.97)PR	10	12	Calcium homeostasis endoplasmic reticulum protein OS=Diaphorina citri OX=121845 GN=LOC103524621 PE=4 SV=1	Calcium homeostasis endoplasmic reticulum protein	LOC103524621	46.25	1393.58	0	666	677	S10:Phosphorylation (STY):71.72	S675	APPGHDSPRDSEG	111.612	427.358	195.073	149.137	183.408	266.094	Quantified	GO:0006874(BP:cellular calcium ion homeostasis);GO:0006396(BP:RNA processing);GO:0005623(CC:cell);GO:0003723(MF:RNA binding)				PF01805(Surp module);PF04818(RNA polymerase II-binding domain.)
A0A3Q0IXQ7	A0A3Q0IXQ7|A0A3Q0IXQ7_DIACI:A0A1S3D7J3|A0A1S3D7J3_DIACI	S	AGAGS(+79.97)ATLSM(+15.99)AYAGAR	5	16	Malate dehydrogenase, mitochondrial-like OS=Diaphorina citri OX=121845 GN=LOC103509286 PE=3 SV=1	Malate dehydrogenase, mitochondrial-like	LOC103509286	42.91	1549.66	-2.3	154	169	S5:Phosphorylation (STY):15.73;M10:Oxidation (M):1000.00	S158	AKAGAGSATLSMA	97.359	400.784	163.593	157.55	763.266	257.134	Quantified	GO:0005975(BP:carbohydrate metabolic process);GO:0016616(MF:oxidoreductase activity, acting on the CH-OH group of donors, NAD or NADP as acceptor)	K00026(NA)	ko00020(Citrate cycle (TCA cycle));ko00270(Cysteine and methionine metabolism);ko00620(Pyruvate metabolism);ko00630(Glyoxylate and dicarboxylate metabolism);ko00710(Carbon fixation in photosynthetic organisms)		PF00056(lactate/malate dehydrogenase, NAD binding domain);PF02866(lactate/malate dehydrogenase, alpha/beta C-terminal domain)
A0A3Q0IXQ7	A0A3Q0IXQ7|A0A3Q0IXQ7_DIACI:A0A1S3D7J3|A0A1S3D7J3_DIACI	S	AGAGS(+79.97)ATLSMAYAGAR	5	16	Malate dehydrogenase, mitochondrial-like OS=Diaphorina citri OX=121845 GN=LOC103509286 PE=3 SV=1	Malate dehydrogenase, mitochondrial-like	LOC103509286	57.94	1533.66	11.1	154	169	S5:Phosphorylation (STY):32.28	S158	AKAGAGSATLSMA	706.109	2137.53	1327.35	1272.87	2077.24	1756.19	Quantified	GO:0005975(BP:carbohydrate metabolic process);GO:0016616(MF:oxidoreductase activity, acting on the CH-OH group of donors, NAD or NADP as acceptor)	K00026(NA)	ko00020(Citrate cycle (TCA cycle));ko00270(Cysteine and methionine metabolism);ko00620(Pyruvate metabolism);ko00630(Glyoxylate and dicarboxylate metabolism);ko00710(Carbon fixation in photosynthetic organisms)		PF00056(lactate/malate dehydrogenase, NAD binding domain);PF02866(lactate/malate dehydrogenase, alpha/beta C-terminal domain)
A0A3Q0ISH0	A0A3Q0ISH0|A0A3Q0ISH0_DIACI	S	AGAVS(+79.97)PSIVGR	5	11	YLP motif-containing protein 1-like OS=Diaphorina citri OX=121845 GN=LOC103506544 PE=4 SV=1	YLP motif-containing protein 1-like	LOC103506544	64.32	1092.53	-1.9	878	888	S5:Phosphorylation (STY):27.16	S882	FRAGAVSPSIVGR	15535	8234.38	10978.2	10351.9	3639.91	9606.02	Quantified	GO:0005634(CC:nucleus)				PF08433(Chromatin associated protein KTI12)
A0A1S3DTI2	A0A1S3DTI2|A0A1S3DTI2_DIACI	Y	AGAVTDDDAGSDHFEDAY(+79.97)DNS(+79.97)GGGDDDEDFEK	18	32	Zinc finger protein 879 OS=Diaphorina citri OX=121845 GN=LOC103523568 PE=4 SV=1	Zinc finger protein 879	LOC103523568	26.46	3495.17	5.4	99	130	Y18:Phosphorylation (STY):1.11;S21:Phosphorylation (STY):0.56	Y116	DHFEDAYDNSGGG	421.954	297.759	534.397	698.867	397.007	879.369	Quantified	GO:0005634(CC:nucleus);GO:0003676(MF:nucleic acid binding);GO:0008270(MF:zinc ion binding)				PF00096(Zinc finger, C2H2 type);PF07776(Zinc-finger associated domain (zf-AD))
A0A1S3DTI2	A0A1S3DTI2|A0A1S3DTI2_DIACI	S	AGAVTDDDAGSDHFEDAY(+79.97)DNS(+79.97)GGGDDDEDFEK	21	32	Zinc finger protein 879 OS=Diaphorina citri OX=121845 GN=LOC103523568 PE=4 SV=1	Zinc finger protein 879	LOC103523568	26.46	3495.17	5.4	99	130	Y18:Phosphorylation (STY):1.11;S21:Phosphorylation (STY):0.56	S119	EDAYDNSGGGDDD	421.954	297.759	534.397	698.867	397.007	879.369	Quantified	GO:0005634(CC:nucleus);GO:0003676(MF:nucleic acid binding);GO:0008270(MF:zinc ion binding)				PF00096(Zinc finger, C2H2 type);PF07776(Zinc-finger associated domain (zf-AD))
A0A1S3DTI2	A0A1S3DTI2|A0A1S3DTI2_DIACI	Y	AGAVTDDDAGSDHFEDAY(+79.97)DNSGGGDDDEDFEK	18	32	Zinc finger protein 879 OS=Diaphorina citri OX=121845 GN=LOC103523568 PE=4 SV=1	Zinc finger protein 879	LOC103523568	37.77	3415.21	3.6	99	130	Y18:Phosphorylation (STY):0.00	Y116	DHFEDAYDNSGGG	6200.76	4154.09	2164.47	7856.7	6055.5	5335.6	Quantified	GO:0005634(CC:nucleus);GO:0003676(MF:nucleic acid binding);GO:0008270(MF:zinc ion binding)				PF00096(Zinc finger, C2H2 type);PF07776(Zinc-finger associated domain (zf-AD))
A0A3Q0IXQ1	A0A3Q0IXQ1|A0A3Q0IXQ1_DIACI	Y	AGAYDY(+79.97)PSPEWDTVTPEAK	6	19	calcium/calmodulin-dependent protein kinase OS=Diaphorina citri OX=121845 GN=LOC103509280 PE=3 SV=1	calcium/calmodulin-dependent protein kinase	LOC103509280	25.19	2175.9	-16	205	223	Y6:Phosphorylation (STY):0.00	Y210	KAGAYDYPSPEWD	115.6	98.8397	221.257	475.515	990.659	602.982	Quantified	GO:0016021(CC:integral component of membrane);GO:0005524(MF:ATP binding);GO:0005516(MF:calmodulin binding);GO:0004683(MF:calmodulin-dependent protein kinase activity)	K04515(NA)	ko04012(ErbB signaling pathway);ko04020(Calcium signaling pathway);ko04024(cAMP signaling pathway);ko04066(HIF-1 signaling pathway);ko04114(Oocyte meiosis);ko04148(Efferocytosis);ko04217(Necroptosis);ko04310(Wnt signaling pathway)		PF08332(Calcium/calmodulin dependent protein kinase II association domain);PF00069(Protein kinase domain)
A0A1S3D4K2	A0A1S3D4K2|A0A1S3D4K2_DIACI	S	AGDAS(+79.97)DDAAS(+79.97)AIK	5	13	Uncharacterized protein LOC103511341 OS=Diaphorina citri OX=121845 GN=LOC103511341 PE=4 SV=2	Uncharacterized protein LOC103511341	LOC103511341	57.49	1350.47	-1.2	718	730		S722	AKAGDASDDAASA	1468.67	947.217	443.088	1318.94	484.167	989.845	Quantified
A0A1S3D4K2	A0A1S3D4K2|A0A1S3D4K2_DIACI	S	AGDAS(+79.97)DDAAS(+79.97)AIK	10	13	Uncharacterized protein LOC103511341 OS=Diaphorina citri OX=121845 GN=LOC103511341 PE=4 SV=2	Uncharacterized protein LOC103511341	LOC103511341	57.49	1350.47	-1.2	718	730		S727	ASDDAASAIKADH	1468.67	947.217	443.088	1318.94	484.167	989.845	Quantified
A0A1S3D4K2	A0A1S3D4K2|A0A1S3D4K2_DIACI	S	AGDAS(+79.97)DDAASAIK	5	13	Uncharacterized protein LOC103511341 OS=Diaphorina citri OX=121845 GN=LOC103511341 PE=4 SV=2	Uncharacterized protein LOC103511341	LOC103511341	68.77	1270.51	-2.4	718	730	S5:Phosphorylation (STY):47.14	S722	AKAGDASDDAASA	1819.84	1501.29	992.537	437.074	1453.88	1922.1	Quantified
A0A1S3D4K2	A0A1S3D4K2|A0A1S3D4K2_DIACI	S	AGDASDDAAS(+79.97)AIK	10	13	Uncharacterized protein LOC103511341 OS=Diaphorina citri OX=121845 GN=LOC103511341 PE=4 SV=2	Uncharacterized protein LOC103511341	LOC103511341	46.53	1270.51	3.1	718	730	S10:Phosphorylation (STY):33.54	S727	ASDDAASAIKADH	1819.84	237.482	204.119	437.074	1453.88	455.472	Quantified
A0A3Q0IW92	A0A3Q0IW92|A0A3Q0IW92_DIACI	S	AGDIPVAEGEAEDAS(+79.97)R	15	16	Heat shock protein 83-like OS=Diaphorina citri OX=121845 GN=LOC103510738 PE=3 SV=1	Heat shock protein 83-like	LOC103510738	55.85	1665.69	1.7	342	357		S356	GEAEDASRMEEVD	3799.34	3271.33	2359.36	1478.25	2052.27	845.223	Quantified	GO:0006457(BP:protein folding);GO:0005524(MF:ATP binding);GO:0051082(MF:unfolded protein binding)	K04079(NA)	ko04141(Protein processing in endoplasmic reticulum);ko04151(PI3K-Akt signaling pathway);ko04217(Necroptosis)		PF00183(Hsp90 protein)
A0A3Q0JBC3	A0A3Q0JBC3|A0A3Q0JBC3_DIACI	S	AGDS(+79.97)YEDMTTTSSGR	4	15	Uncharacterized protein LOC103518026 OS=Diaphorina citri OX=121845 GN=LOC103518026 PE=4 SV=1	Uncharacterized protein LOC103518026	LOC103518026	67.89	1656.6	3.2	315	329	S4:Phosphorylation (STY):0.00	S318	DSRAGDSYEDMTT	2210.39	3251.3	4028.13	3345.45	2541.69	2990.12	Quantified	GO:0016021(CC:integral component of membrane)				PF13927(Immunoglobulin domain)
A0A3Q0IN52	A0A3Q0IN52|A0A3Q0IN52_DIACI	S	AGEAVSSTS(+79.97)LK	9	11	LOW QUALITY PROTEIN: titin OS=Diaphorina citri OX=121845 GN=LOC103524768 PE=4 SV=1	LOW QUALITY PROTEIN: titin	LOC103524768	49.09	1128.51	6.2	2587	2597	S9:Phosphorylation (STY):0.00	S2595	EAVSSTSLKVKSK	607.156	360.031	599.711	629.736	322.492	533.033	Quantified					PF07679(Immunoglobulin I-set domain);PF06582(Repeat of unknown function (DUF1136))
A0A1S3CU66	A0A1S3CU66|A0A1S3CU66_DIACI	S	AGGLPGILRPTVDDDS(+79.97)D	16	17	Phosducin-like protein OS=Diaphorina citri OX=121845 GN=LOC103505343 PE=3 SV=1	Phosducin-like protein	LOC103505343	74.74	1776.79	0.4	268	284	S16:Phosphorylation (STY):41.96	S283	PTVDDDSD_____	27847	34145.5	20632.4	25129.5	19244.7	17314.1	Quantified					PF02114(Phosducin)
A0A3Q0IPJ2	A0A3Q0IPJ2|A0A3Q0IPJ2_DIACI	S	AGIYGFDS(+79.97)DDENEVDR	8	16	LOW QUALITY PROTEIN: obscurin-like OS=Diaphorina citri OX=121845 GN=LOC103507575 PE=3 SV=1	LOW QUALITY PROTEIN: obscurin-like	LOC103507575	85.98	1880.71	2.5	1302	1317	S8:Phosphorylation (STY):135.92	S1309	GIYGFDSDDENEV	50675.9	57395.3	54076.5	61107.8	39034.1	34645.4	Quantified	GO:0005524(MF:ATP binding);GO:0005085(MF:guanyl-nucleotide exchange factor activity);GO:0004672(MF:protein kinase activity)				PF00621(RhoGEF domain);PF00069(Protein kinase domain);PF00041(Fibronectin type III domain);PF07679(Immunoglobulin I-set domain)
A0A3Q0IPJ2	A0A3Q0IPJ2|A0A3Q0IPJ2_DIACI	S	AGIYGFDS(+79.97)DDENEVDRK	8	17	LOW QUALITY PROTEIN: obscurin-like OS=Diaphorina citri OX=121845 GN=LOC103507575 PE=3 SV=1	LOW QUALITY PROTEIN: obscurin-like	LOC103507575	41.45	2008.81	3	1302	1318	S8:Phosphorylation (STY):16.51	S1309	GIYGFDSDDENEV	11375.5	11663.3	8811.79	4233.18	6663.38	4600.2	Quantified	GO:0005524(MF:ATP binding);GO:0005085(MF:guanyl-nucleotide exchange factor activity);GO:0004672(MF:protein kinase activity)				PF00621(RhoGEF domain);PF00069(Protein kinase domain);PF00041(Fibronectin type III domain);PF07679(Immunoglobulin I-set domain)
A0A3Q0JLM9	A0A3Q0JLM9|A0A3Q0JLM9_DIACI	S	AGLVEVEAMS(+79.97)PTGRTLPC(+57.02)PVNER	10	23	Filamin-A-like OS=Diaphorina citri OX=121845 GN=LOC103524339 PE=3 SV=1	Filamin-A-like	LOC103524339	25.77	2562.2	0.1	367	389	S10:Phosphorylation (STY):0.00;C18:Carbamidomethylation:1000.00	S376	VEVEAMSPTGRTL	403.574	417.137	370.214	229.43	713.648	640.803	Quantified	GO:0016020(CC:membrane);GO:0005215(MF:transporter activity)				PF00307(Calponin homology (CH) domain)
A0A3Q0JFK9	A0A3Q0JFK9|A0A3Q0JFK9_DIACI	T	AGPGGDLIQET(+79.97)PTPGGVSSK	11	20	Splicing factor 3B subunit 1 OS=Diaphorina citri OX=121845 GN=LOC103520279 PE=3 SV=1	Splicing factor 3B subunit 1	LOC103520279	40.36	1946.9	1.7	621	640	T11:Phosphorylation (STY):22.85	T631	GDLIQETPTPGGV	1774.46	1299.64	1917.46	683.363	1340.9	362.451	Quantified	GO:0016255(BP:attachment of GPI anchor to protein);GO:0000245(BP:spliceosomal complex assembly);GO:0042765(CC:GPI-anchor transamidase complex);GO:0003729(MF:mRNA binding)			Nucleus	PF08920(Splicing factor 3B subunit 1);PF06728(GPI transamidase subunit PIG-U)
A0A3Q0JD23	A0A3Q0JD23|A0A3Q0JD23_DIACI	Y	AGQEEVITLEEPEVVEQPKPGVGVQY(+79.97)QTPEK	26	31	Titin OS=Diaphorina citri OX=121845 GN=LOC103518851 PE=4 SV=1	Titin	LOC103518851	32.93	3486.68	-2.7	53	83	Y26:Phosphorylation (STY):0.00	Y78	PGVGVQYQTPEKV	545.242	6451.83	5894.6	2803.87	1264.57	806.412	Quantified					PF07679(Immunoglobulin I-set domain)
A0A3Q0JD23	A0A3Q0JD23|A0A3Q0JD23_DIACI	T	AGQEEVITLEEPEVVEQPKPGVGVQYQT(+79.97)PEK	28	31	Titin OS=Diaphorina citri OX=121845 GN=LOC103518851 PE=4 SV=1	Titin	LOC103518851	57.05	3486.68	2.8	53	83	T28:Phosphorylation (STY):0.00	T80	VGVQYQTPEKVTT	794.295	6451.83	5894.6	7889.85	1264.57	2176.92	Quantified					PF07679(Immunoglobulin I-set domain)
A0A3Q0IWX6	A0A3Q0IWX6|A0A3Q0IWX6_DIACI	T	AGQPVVPPVIRPGGVT(+79.97)SPR	16	19	Kinesin heavy chain OS=Diaphorina citri OX=121845 GN=LOC103508915 PE=3 SV=1	Kinesin heavy chain	LOC103508915	41.76	1963.04	2.7	465	483	T16:Phosphorylation (STY):0.00	T480	IRPGGVTSPRWGD	1248.4	984.834	119.733	422.475	304.826	2752.08	Quantified	GO:0007018(BP:microtubule-based movement);GO:0005524(MF:ATP binding);GO:0008017(MF:microtubule binding);GO:0003777(MF:microtubule motor activity)	K10396(NA)	ko04144(Endocytosis);ko04814(Motor proteins)		PF00225(Kinesin motor domain)
A0A3Q0IWX6	A0A3Q0IWX6|A0A3Q0IWX6_DIACI	S	AGQPVVPPVIRPGGVTS(+79.97)PR	17	19	Kinesin heavy chain OS=Diaphorina citri OX=121845 GN=LOC103508915 PE=3 SV=1	Kinesin heavy chain	LOC103508915	47.9	1963.04	-4	465	483	S17:Phosphorylation (STY):0.00	S481	RPGGVTSPRWGDE	530.972	128.171	289.63	306.631	304.826	280.976	Quantified	GO:0007018(BP:microtubule-based movement);GO:0005524(MF:ATP binding);GO:0008017(MF:microtubule binding);GO:0003777(MF:microtubule motor activity)	K10396(NA)	ko04144(Endocytosis);ko04814(Motor proteins)		PF00225(Kinesin motor domain)
A0A3Q0IZK0	A0A3Q0IZK0|A0A3Q0IZK0_DIACI	S	AGQS(+79.97)FSFDVK	4	10	LOW QUALITY PROTEIN: twitchin-like OS=Diaphorina citri OX=121845 GN=LOC103512392 PE=4 SV=1	LOW QUALITY PROTEIN: twitchin-like	LOC103512392	62.36	1164.49	-2.3	5805	5814	S4:Phosphorylation (STY):22.85	S5808	KIKAGQSFSFDVK	3338.85	1111.35	2157.2	6200.62	6372.93	4832.49	Quantified					PF07679(Immunoglobulin I-set domain);PF00041(Fibronectin type III domain)
A0A1S3D2D0	A0A1S3D2D0|A0A1S3D2D0_DIACI	S	AGS(+79.97)AVDDFIDK	3	11	6-phosphogluconate dehydrogenase, decarboxylating OS=Diaphorina citri OX=121845 GN=LOC103510040 PE=3 SV=1	6-phosphogluconate dehydrogenase, decarboxylating	LOC103510040	57.14	1216.5	-3.6	85	95		S87	MLVKAGSAVDDFI	939.624	570.98	1166.77	1638.92	2530.05	2060.46	Quantified	GO:0019521(BP:D-gluconate metabolic process);GO:0006098(BP:pentose-phosphate shunt);GO:0050661(MF:NADP binding);GO:0004616(MF:phosphogluconate dehydrogenase (decarboxylating) activity)	K00033(NA)	ko00030(Pentose phosphate pathway);ko00480(Glutathione metabolism)		PF00393(6-phosphogluconate dehydrogenase, C-terminal domain);PF03446(NAD binding domain of 6-phosphogluconate dehydrogenase)
A0A3Q0IZK0	A0A3Q0IZK0|A0A3Q0IZK0_DIACI:A0A3Q0J4R3|A0A3Q0J4R3_DIACI	S	AGS(+79.97)NFEFDINVIGEPIPTK	3	19	LOW QUALITY PROTEIN: twitchin-like OS=Diaphorina citri OX=121845 GN=LOC103512392 PE=4 SV=1	LOW QUALITY PROTEIN: twitchin-like	LOC103512392	74.74	2126.99	2.3	5343	5361	S3:Phosphorylation (STY):223.33	S5345	IKVRAGSNFEFDI	9179.08	60578.2	13305.7	433.896	51162.3	14960.2	Quantified					PF07679(Immunoglobulin I-set domain);PF00041(Fibronectin type III domain)
A0A1S3DPN7	A0A1S3DPN7|A0A1S3DPN7_DIACI	S	AGSGGNSLTGPPSLDEENSSSQDNEPGGS(+79.97)PK	29	31	Zinc finger protein ubi-d4 B-like OS=Diaphorina citri OX=121845 GN=LOC103522545 PE=4 SV=1	Zinc finger protein ubi-d4 B-like	LOC103522545	31.83	3051.26	-1.9	54	84	S29:Phosphorylation (STY):22.49	S82	DNEPGGSPKLAGG	262.88	372.519	466.959	482.275	493.525	374.931	Quantified	GO:0071565(CC:nBAF complex);GO:0003676(MF:nucleic acid binding);GO:0008270(MF:zinc ion binding)
A0A3Q0IMI0	A0A3Q0IMI0|A0A3Q0IMI0_DIACI	S	AGSNTSVATNGWES(+79.97)PK	14	16	Protein enabled-like OS=Diaphorina citri OX=121845 GN=LOC103524751 PE=3 SV=1	Protein enabled-like	LOC103524751	64.72	1684.71	4.3	373	388	S14:Phosphorylation (STY):18.93	S386	ATNGWESPKTSRK	14239.2	17115.9	14276	10261.3	6953.68	9361	Quantified				Cytoplasm;cytoskeleton	PF08776(VASP tetramerisation domain);PF00568(WH1 domain)
A0A3Q0IZI1	A0A3Q0IZI1|A0A3Q0IZI1_DIACI	S	AGVSWVAVGDENYGEGS(+79.97)SR	17	19	Aconitate hydratase, mitochondrial OS=Diaphorina citri OX=121845 GN=LOC103510188 PE=3 SV=1	Aconitate hydratase, mitochondrial	LOC103510188	47.33	2018.84	3.7	659	677	S17:Phosphorylation (STY):0.00	S675	ENYGEGSSREHAA	281.4	23.9738	416.057	369.199	1338.52	278.842	Quantified	GO:0006099(BP:tricarboxylic acid cycle);GO:0005739(CC:mitochondrion);GO:0051539(MF:4 iron, 4 sulfur cluster binding);GO:0003994(MF:aconitate hydratase activity);GO:0046872(MF:metal ion binding)	K01681(NA)	ko00020(Citrate cycle (TCA cycle));ko00630(Glyoxylate and dicarboxylate metabolism);ko00720(Carbon fixation pathways in prokaryotes)	Mitochondrion	PF00330(Aconitase family (aconitate hydratase));PF00694(Aconitase C-terminal domain)
A0A3Q0IZI1	A0A3Q0IZI1|A0A3Q0IZI1_DIACI	S	AGVSWVAVGDENYGEGSS(+79.97)R	18	19	Aconitate hydratase, mitochondrial OS=Diaphorina citri OX=121845 GN=LOC103510188 PE=3 SV=1	Aconitate hydratase, mitochondrial	LOC103510188	33.59	2018.84	1	659	677	S18:Phosphorylation (STY):0.00	S676	NYGEGSSREHAAL	399.654	714.737	51.7963	369.199	159.264	278.842	Quantified	GO:0006099(BP:tricarboxylic acid cycle);GO:0005739(CC:mitochondrion);GO:0051539(MF:4 iron, 4 sulfur cluster binding);GO:0003994(MF:aconitate hydratase activity);GO:0046872(MF:metal ion binding)	K01681(NA)	ko00020(Citrate cycle (TCA cycle));ko00630(Glyoxylate and dicarboxylate metabolism);ko00720(Carbon fixation pathways in prokaryotes)	Mitochondrion	PF00330(Aconitase family (aconitate hydratase));PF00694(Aconitase C-terminal domain)
A0A1S3CTU9	A0A1S3CTU9|A0A1S3CTU9_DIACI	S	AGYS(+79.97)SYGESEEENIR	4	15	Uncharacterized protein LOC103505042 OS=Diaphorina citri OX=121845 GN=LOC103505042 PE=4 SV=1	Uncharacterized protein LOC103505042	LOC103505042	43.96	1769.68	13.6	229	243	S4:Phosphorylation (STY):0.00	S232	NGRAGYSSYGESE	1101.6	1919.4	816.629	4462.72	2726.98	965.402	Quantified
A0A1S3CTU9	A0A1S3CTU9|A0A1S3CTU9_DIACI	S	AGYSS(+79.97)YGES(+79.97)EEENIR	5	15	Uncharacterized protein LOC103505042 OS=Diaphorina citri OX=121845 GN=LOC103505042 PE=4 SV=1	Uncharacterized protein LOC103505042	LOC103505042	36.53	1849.64	0.7	229	243	S5:Phosphorylation (STY):0.00;S9:Phosphorylation (STY):19.05	S233	GRAGYSSYGESEE	4503.28	3719.8	4482.52	8313.75	3928.94	3201.67	Quantified
A0A1S3CTU9	A0A1S3CTU9|A0A1S3CTU9_DIACI	S	AGYSS(+79.97)YGES(+79.97)EEENIR	9	15	Uncharacterized protein LOC103505042 OS=Diaphorina citri OX=121845 GN=LOC103505042 PE=4 SV=1	Uncharacterized protein LOC103505042	LOC103505042	36.53	1849.64	0.7	229	243	S5:Phosphorylation (STY):0.00;S9:Phosphorylation (STY):19.05	S237	YSSYGESEEENIR	4503.28	3719.8	4482.52	8313.75	3928.94	3201.67	Quantified
A0A1S3CTU9	A0A1S3CTU9|A0A1S3CTU9_DIACI	S	AGYSS(+79.97)YGES(+79.97)EEENIRR	5	16	Uncharacterized protein LOC103505042 OS=Diaphorina citri OX=121845 GN=LOC103505042 PE=4 SV=1	Uncharacterized protein LOC103505042	LOC103505042	25.19	2005.75	2.9	229	244	S5:Phosphorylation (STY):0.00;S9:Phosphorylation (STY):5.14	S233	GRAGYSSYGESEE	3225.92	4684.51	6362.03	4469.86	6579.76	7459.33	Quantified
A0A1S3CTU9	A0A1S3CTU9|A0A1S3CTU9_DIACI	S	AGYSS(+79.97)YGES(+79.97)EEENIRR	9	16	Uncharacterized protein LOC103505042 OS=Diaphorina citri OX=121845 GN=LOC103505042 PE=4 SV=1	Uncharacterized protein LOC103505042	LOC103505042	25.19	2005.75	2.9	229	244	S5:Phosphorylation (STY):0.00;S9:Phosphorylation (STY):5.14	S237	YSSYGESEEENIR	3225.92	4684.51	6362.03	4469.86	6579.76	7459.33	Quantified
A0A1S3CTU9	A0A1S3CTU9|A0A1S3CTU9_DIACI	S	AGYSS(+79.97)YGESEEENIR	5	15	Uncharacterized protein LOC103505042 OS=Diaphorina citri OX=121845 GN=LOC103505042 PE=4 SV=1	Uncharacterized protein LOC103505042	LOC103505042	55.37	1769.68	3.6	229	243	S5:Phosphorylation (STY):0.00	S233	GRAGYSSYGESEE	4016.77	1919.4	340.993	5869.75	2726.98	4097.63	Quantified
A0A1S3CTU9	A0A1S3CTU9|A0A1S3CTU9_DIACI	S	AGYSSYGES(+79.97)EEENIR	9	15	Uncharacterized protein LOC103505042 OS=Diaphorina citri OX=121845 GN=LOC103505042 PE=4 SV=1	Uncharacterized protein LOC103505042	LOC103505042	65.91	1769.68	3.5	229	243	S9:Phosphorylation (STY):49.37	S237	YSSYGESEEENIR	13164	13613.2	15043.8	23080.9	12293.8	10669.8	Quantified
A0A1S3CTU9	A0A1S3CTU9|A0A1S3CTU9_DIACI	S	AGYSSYGES(+79.97)EEENIRR	9	16	Uncharacterized protein LOC103505042 OS=Diaphorina citri OX=121845 GN=LOC103505042 PE=4 SV=1	Uncharacterized protein LOC103505042	LOC103505042	27.14	1925.78	1	229	244	S9:Phosphorylation (STY):5.14	S237	YSSYGESEEENIR	12597	17725.6	13268.3	11314.9	13988.2	13514.1	Quantified
A0A3Q0JJD2	A0A3Q0JJD2|A0A3Q0JJD2_DIACI	S	AHHPAS(+79.97)SGLEHFFDDDR	6	17	Uncharacterized protein LOC103520248 OS=Diaphorina citri OX=121845 GN=LOC103520248 PE=4 SV=1	Uncharacterized protein LOC103520248	LOC103520248	37.78	2016.81	-3.2	377	393	S6:Phosphorylation (STY):17.01	S382	KAHHPASSGLEHF	590.284	631.714	506.859	90.3192	292.421	321.301	Quantified
A0A1S3CY85	A0A1S3CY85|A0A1S3CY85_DIACI	T	AHPDHPVFILT(+79.97)QEDIETGR	11	19	Uncharacterized protein LOC103507527 OS=Diaphorina citri OX=121845 GN=LOC103507527 PE=4 SV=1	Uncharacterized protein LOC103507527	LOC103507527	85.9	2254.04	-1	1257	1275	T11:Phosphorylation (STY):163.63	T1267	HPVFILTQEDIET	133076	167528	126273	187401	170695	155006	Quantified
A0A3Q0JLD1	A0A3Q0JLD1|A0A3Q0JLD1_DIACI:Q0PXZ0|Q0PXZ0_DIACI	S	AHS(+79.97)IQIIK	3	8	Large ribosomal subunit protein eL20 OS=Diaphorina citri OX=121845 GN=LOC103520936 PE=3 SV=1	Large ribosomal subunit protein eL20	LOC103520936	44.81	988.511	-1.6	171	178		S173	HRARAHSIQIIKL			148.3	76.0929		110.189	Quantified	GO:0006412(BP:translation);GO:0005840(CC:ribosome);GO:0003735(MF:structural constituent of ribosome)	K02882(NA)	ko03010(Ribosome)		PF01775(Ribosomal proteins 50S-L18Ae/60S-L20/60S-L18A)
A0A3Q0JJD2	A0A3Q0JJD2|A0A3Q0JJD2_DIACI	S	AHS(+79.97)LSELLNNEIR	3	13	Uncharacterized protein LOC103520248 OS=Diaphorina citri OX=121845 GN=LOC103520248 PE=4 SV=1	Uncharacterized protein LOC103520248	LOC103520248	45.61	1574.75	-2.5	13	25	S3:Phosphorylation (STY):28.86	S15	KTMRAHSLSELLN	672.276	359.725	333.442	157.375	3032.47	367.887	Quantified
A0A3Q0JG04	A0A3Q0JG04|A0A3Q0JG04_DIACI	S	AHS(+79.97)SPASLQQTYASAQQQHQQHLK	3	24	Uncharacterized protein LOC103518349 OS=Diaphorina citri OX=121845 GN=LOC103518349 PE=4 SV=1	Uncharacterized protein LOC103518349	LOC103518349	74.38	2753.27	-2.8	248	271	S3:Phosphorylation (STY):14.02	S250	AHPRAHSSPASLQ	64837.2	70816.8	86239.4	4085.35	41080.9	32480.2	Quantified	GO:0016757(MF:transferase activity, transferring glycosyl groups)	K00750(NA)	ko00500(Starch and sucrose metabolism)		PF01501(Glycosyl transferase family 8)
A0A3Q0JG04	A0A3Q0JG04|A0A3Q0JG04_DIACI	S	AHSS(+79.97)PASLQQTYASAQQQHQQHLK	4	24	Uncharacterized protein LOC103518349 OS=Diaphorina citri OX=121845 GN=LOC103518349 PE=4 SV=1	Uncharacterized protein LOC103518349	LOC103518349	80.52	2753.27	-5.6	248	271	S4:Phosphorylation (STY):9.34	S251	HPRAHSSPASLQQ	46227.2	18883.1	45961.2	987.757	31925.8	25850.7	Quantified	GO:0016757(MF:transferase activity, transferring glycosyl groups)	K00750(NA)	ko00500(Starch and sucrose metabolism)		PF01501(Glycosyl transferase family 8)
A0A3Q0JG04	A0A3Q0JG04|A0A3Q0JG04_DIACI	S	AHSSPAS(+79.97)LQQTYASAQQQHQQHLK	7	24	Uncharacterized protein LOC103518349 OS=Diaphorina citri OX=121845 GN=LOC103518349 PE=4 SV=1	Uncharacterized protein LOC103518349	LOC103518349	62.7	2753.27	-3.7	248	271	S7:Phosphorylation (STY):11.12	S254	AHSSPASLQQTYA	1031.75	10714	971.918	3119.26	8973.09	833.591	Quantified	GO:0016757(MF:transferase activity, transferring glycosyl groups)	K00750(NA)	ko00500(Starch and sucrose metabolism)		PF01501(Glycosyl transferase family 8)
A0A1S3CUU8	A0A1S3CUU8|A0A1S3CUU8_DIACI	T	AHT(+79.97)PTPGIYMGRPTYR	3	16	Transformer-2 protein homolog beta-like OS=Diaphorina citri OX=121845 GN=LOC103504976 PE=4 SV=1	Transformer-2 protein homolog beta-like	LOC103504976	28.53	1896.87	0.7	210	225	T3:Phosphorylation (STY):14.04	T212	VTQRAHTPTPGIY	2294.17	6598.82	7813.16	629.837	6513.49	4240.18	Quantified	GO:0003723(MF:RNA binding)				PF00076(RNA recognition motif. (a.k.a. RRM, RBD, or RNP domain))
A0A1S3DHZ5	A0A1S3DHZ5|A0A1S3DHZ5_DIACI	T	AIANVFDQDT(+79.97)DSNEK	10	15	Uncharacterized protein LOC103518745 OS=Diaphorina citri OX=121845 GN=LOC103518745 PE=4 SV=1	Uncharacterized protein LOC103518745	LOC103518745	35.8	1745.71	-1.8	1821	1835	T10:Phosphorylation (STY):5.99	T1830	NVFDQDTDSNEKS	225.419	478.523	270.065	802.768	252.929	352.913	Quantified	GO:0003676(MF:nucleic acid binding)				PF01585(G-patch domain)
A0A1S3D182	A0A1S3D182|A0A1S3D182_DIACI	S	AIDDMIDENEVENAAPKPPVS(+79.97)PDGEFSGDVFANK	21	34	Uncharacterized protein LOC103509231 OS=Diaphorina citri OX=121845 GN=LOC103509231 PE=4 SV=1	Uncharacterized protein LOC103509231	LOC103509231	27.25	3696.62	2.1	20	53	S21:Phosphorylation (STY):0.00	S40	APKPPVSPDGEFS	467.007	204.656	791.054	223.607	831.397	1403.12	Quantified
A0A3Q0J7G0	A0A3Q0J7G0|A0A3Q0J7G0_DIACI	S	AIDGGSQLS(+79.97)PAPSETSTIESVTPSVPLDK	9	29	Uncharacterized protein LOC113469421 OS=Diaphorina citri OX=121845 GN=LOC113469421 PE=4 SV=1	Uncharacterized protein LOC113469421	LOC113469421	63.59	2962.41	-7.5	342	370	S9:Phosphorylation (STY):9.42	S350	DGGSQLSPAPSET	702.301	313.366	198.417	191.513	709.8	778.261	Quantified	GO:0003676(MF:nucleic acid binding)
A0A3Q0IVH9	A0A3Q0IVH9|A0A3Q0IVH9_DIACI	S	AIDPNDIES(+79.97)PR	9	11	Protein RIC1 homolog OS=Diaphorina citri OX=121845 GN=LOC103508212 PE=4 SV=1	Protein RIC1 homolog	LOC103508212	53.14	1305.56	2.9	1031	1041		S1039	DPNDIESPRTSVI	1876.83	2123.73	1022.95	4289.44	3055.54	3060.11	Quantified	GO:0006886(BP:intracellular protein transport);GO:0034066(CC:RIC1-RGP1 guanyl-nucleotide exchange factor complex)				PF07064(RIC1)
A0A1S4EES7	A0A1S4EES7|A0A1S4EES7_DIACI	T	AIEILGGTLGSKT(+79.97)PVHPNDHVNK	13	23	fumarate hydratase OS=Diaphorina citri OX=121845 GN=LOC103512153 PE=3 SV=2	fumarate hydratase	LOC103512153	43.07	2476.25	-0.5	142	164	T13:Phosphorylation (STY):0.00	T154	GTLGSKTPVHPND	161.079	639.911	1363.47	368.227	1407.73	335.643	Quantified	GO:0006106(BP:fumarate metabolic process);GO:0045239(CC:tricarboxylic acid cycle enzyme complex);GO:0004333(MF:fumarate hydratase activity)				PF00206(Lyase)
A0A3Q0IRT6	A0A3Q0IRT6|A0A3Q0IRT6_DIACI:A0A3Q0ILZ7|A0A3Q0ILZ7_DIACI	S	AIIPDLGNDAAS(+79.97)LK	12	14	Talin-1 isoform X3 OS=Diaphorina citri OX=121845 GN=LOC103506485 PE=4 SV=1	Talin-1 isoform X3	LOC103506485	56.26	1476.72	1.5	534	547		S545	LGNDAASLKWKET	1723.21	1772.85	1321.01	2947.57	2547.78	2132.06	Quantified	GO:0007155(BP:cell adhesion);GO:0007016(BP:cytoskeletal anchoring at plasma membrane);GO:0006897(BP:endocytosis);GO:0005623(CC:cell);GO:0005856(CC:cytoskeleton);GO:0005925(CC:focal adhesion);GO:0001726(CC:ruffle);GO:0051015(MF:actin filament binding);GO:0030276(MF:clathrin binding);GO:0005200(MF:structural constituent of cytoskeleton)	K06271(NA)	ko04015(Rap1 signaling pathway);ko04510(Focal adhesion)		PF09141(Talin, middle domain);PF08913(Vinculin Binding Site);PF01608(I/LWEQ domain);PF16511(N-terminal or F0 domain of Talin-head FERM);PF02174(PTB domain (IRS-1 type));PF00373(FERM central domain);PF09379(FERM N-terminal domain)
A0A3Q0IZK0	A0A3Q0IZK0|A0A3Q0IZK0_DIACI	S	AINDEGESEPLES(+79.97)EHS(+79.97)IVAK	13	20	LOW QUALITY PROTEIN: twitchin-like OS=Diaphorina citri OX=121845 GN=LOC103512392 PE=4 SV=1	LOW QUALITY PROTEIN: twitchin-like	LOC103512392	38.2	2312.95	1.7	4347	4366	S13:Phosphorylation (STY):14.62;S16:Phosphorylation (STY):19.48	S4359	ESEPLESEHSIVA	52.4549	119.192	942.792	127.881	92.5488	135.839	Quantified					PF07679(Immunoglobulin I-set domain);PF00041(Fibronectin type III domain)
A0A3Q0IZK0	A0A3Q0IZK0|A0A3Q0IZK0_DIACI	S	AINDEGESEPLES(+79.97)EHS(+79.97)IVAK	16	20	LOW QUALITY PROTEIN: twitchin-like OS=Diaphorina citri OX=121845 GN=LOC103512392 PE=4 SV=1	LOW QUALITY PROTEIN: twitchin-like	LOC103512392	38.2	2312.95	1.7	4347	4366	S13:Phosphorylation (STY):14.62;S16:Phosphorylation (STY):19.48	S4362	PLESEHSIVAKNP	52.4549	119.192	942.792	127.881	92.5488	135.839	Quantified					PF07679(Immunoglobulin I-set domain);PF00041(Fibronectin type III domain)
A0A3Q0IZK0	A0A3Q0IZK0|A0A3Q0IZK0_DIACI	S	AINDEGESEPLESEHS(+79.97)IVAK	16	20	LOW QUALITY PROTEIN: twitchin-like OS=Diaphorina citri OX=121845 GN=LOC103512392 PE=4 SV=1	LOW QUALITY PROTEIN: twitchin-like	LOC103512392	34.67	2232.98	-9.4	4347	4366	S16:Phosphorylation (STY):0.00	S4362	PLESEHSIVAKNP	1571.53	899.847	2211.73	2215.88	2787.19	1323.15	Quantified					PF07679(Immunoglobulin I-set domain);PF00041(Fibronectin type III domain)
A0A3Q0J7Y7	A0A3Q0J7Y7|A0A3Q0J7Y7_DIACI	S	AIS(+79.97)C(+57.02)PEMK	3	8	Hamartin OS=Diaphorina citri OX=121845 GN=LOC103516367 PE=4 SV=1	Hamartin	LOC103516367	30.5	1014.39	-2.2	364	371	C4:Carbamidomethylation:1000.00	S366	RVRRAISCPEMKK	712.288	142.973	190.663	441.167	634.607	660.357	Quantified		K07206(NA)	ko04072(Phospholipase D signaling pathway);ko04140(Autophagy - animal);ko04150(mTOR signaling pathway);ko04151(PI3K-Akt signaling pathway);ko04152(AMPK signaling pathway);ko04218(Cellular senescence)		PF04388(Hamartin protein)
A0A3Q0JAB6	A0A3Q0JAB6|A0A3Q0JAB6_DIACI	S	AIS(+79.97)GNLEELVDDNPEPSHR	3	19	Voltage-dependent calcium channel type D subunit alpha-1 OS=Diaphorina citri OX=121845 GN=LOC103517906 PE=4 SV=1	Voltage-dependent calcium channel type D subunit alpha-1	LOC103517906	39.29	2170.95	0.9	872	890	S3:Phosphorylation (STY):31.13	S874	ELKRAISGNLEEL	6255.89	6654.31	3789.61	14285	6265.26	7353.53	Quantified	GO:0016021(CC:integral component of membrane);GO:0005216(MF:ion channel activity)				PF00520(Ion transport protein);PF16905(Voltage-dependent L-type calcium channel, IQ-associated);PF08763(Voltage gated calcium channel IQ domain)
A0A1S3D1U7	A0A1S3D1U7|A0A1S3D1U7_DIACI	S	AIS(+79.97)KDLLHK	3	9	Uncharacterized protein LOC103508810 OS=Diaphorina citri OX=121845 GN=LOC103508810 PE=4 SV=2	Uncharacterized protein LOC103508810	LOC103508810	53.19	1103.57	-2.6	1346	1354		S1348	ILMKAISKDLLHK	809.029	1015.85	1521.1	529.179	212.944	348.854	Quantified
A0A3Q0J0S0	A0A3Q0J0S0|A0A3Q0J0S0_DIACI	S	AIS(+79.97)LILDEGK	3	10	Vinculin OS=Diaphorina citri OX=121845 GN=LOC103510787 PE=3 SV=1	Vinculin	LOC103510787	60.9	1137.57	-5.7	395	404		S397	LGVRAISLILDEG	577.247		563.326	1472.48	1383.38	713.071	Quantified	GO:0007155(BP:cell adhesion);GO:0051015(MF:actin filament binding)	K05700(NA)	ko04510(Focal adhesion);ko04520(Adherens junction);ko04810(Regulation of actin cytoskeleton)		PF01044(Vinculin family)
A0A3Q0J0S0	A0A3Q0J0S0|A0A3Q0J0S0_DIACI	S	AIS(+79.97)LILDEGKK	3	11	Vinculin OS=Diaphorina citri OX=121845 GN=LOC103510787 PE=3 SV=1	Vinculin	LOC103510787	67.29	1265.66	-4.2	395	405		S397	LGVRAISLILDEG	6764.11	14126.4	9330.34	9696.31	11740.1	7397.19	Quantified	GO:0007155(BP:cell adhesion);GO:0051015(MF:actin filament binding)	K05700(NA)	ko04510(Focal adhesion);ko04520(Adherens junction);ko04810(Regulation of actin cytoskeleton)		PF01044(Vinculin family)
A0A1S3CY94	A0A1S3CY94|A0A1S3CY94_DIACI	S	AIS(+79.97)PEQTDS(+79.97)VHSGTPEPFEVENR	3	23	Nuclear receptor-binding protein homolog OS=Diaphorina citri OX=121845 GN=LOC103507536 PE=4 SV=1	Nuclear receptor-binding protein homolog	LOC103507536	34.42	2685.1	-0.1	90	112	S3:Phosphorylation (STY):49.79;S9:Phosphorylation (STY):0.00	S92	IRPRAISPEQTDS	2433.46	685.718	1540.34	4494.79	3007.36	3234.11	Quantified
A0A1S3CY94	A0A1S3CY94|A0A1S3CY94_DIACI	S	AIS(+79.97)PEQTDS(+79.97)VHSGTPEPFEVENR	9	23	Nuclear receptor-binding protein homolog OS=Diaphorina citri OX=121845 GN=LOC103507536 PE=4 SV=1	Nuclear receptor-binding protein homolog	LOC103507536	34.42	2685.1	-0.1	90	112	S3:Phosphorylation (STY):49.79;S9:Phosphorylation (STY):0.00	S98	SPEQTDSVHSGTP	2433.46	685.718	1540.34	4494.79	3007.36	3234.11	Quantified
A0A1S3CY94	A0A1S3CY94|A0A1S3CY94_DIACI	S	AIS(+79.97)PEQTDSVHSGTPEPFEVENR	3	23	Nuclear receptor-binding protein homolog OS=Diaphorina citri OX=121845 GN=LOC103507536 PE=4 SV=1	Nuclear receptor-binding protein homolog	LOC103507536	70.73	2605.13	-2.3	90	112	S3:Phosphorylation (STY):42.68	S92	IRPRAISPEQTDS	19171.8	12262	15395.9	23672.2	23419.9	24139.7	Quantified
A0A1S3CXR5	A0A1S3CXR5|A0A1S3CXR5_DIACI	S	AIS(+79.97)PPKEYTK	3	10	DNA repair protein XRCC1-like OS=Diaphorina citri OX=121845 GN=LOC103507257 PE=4 SV=1	DNA repair protein XRCC1-like	LOC103507257	39.91	1212.58	-0.6	196	205	S3:Phosphorylation (STY):19.39	S198	SKRKAISPPKEYT	2953.2	3339.95	3553.37	4215.73	3868.59	5100.22	Quantified	GO:0000012(BP:single strand break repair);GO:0005634(CC:nucleus);GO:0003684(MF:damaged DNA binding)	K10803(NA)	ko03410(Base excision repair)	Nucleus	PF12738(twin BRCT domain);PF16589(BRCT domain, a BRCA1 C-terminus domain);PF01834(XRCC1 N terminal domain)
A0A3Q0J6A5	A0A3Q0J6A5|A0A3Q0J6A5_DIACI	S	AIS(+79.97)SEDIGDHR	3	11	LOW QUALITY PROTEIN: dmX-like protein 1 OS=Diaphorina citri OX=121845 GN=LOC103513612 PE=4 SV=1	LOW QUALITY PROTEIN: dmX-like protein 1	LOC103513612	54.36	1278.52	-0.8	578	588	S3:Phosphorylation (STY):24.44	S580	SFMKAISSEDIGD	943.2	1181.42	978.56	2570.41	1228.92	1515.66	Quantified					PF12234(RAVE protein 1 C terminal)
A0A3Q0J6A5	A0A3Q0J6A5|A0A3Q0J6A5_DIACI	S	AISS(+79.97)EDIGDHR	4	11	LOW QUALITY PROTEIN: dmX-like protein 1 OS=Diaphorina citri OX=121845 GN=LOC103513612 PE=4 SV=1	LOW QUALITY PROTEIN: dmX-like protein 1	LOC103513612	32.86	1278.52	0.2	578	588	S4:Phosphorylation (STY):0.00	S581	FMKAISSEDIGDH	943.2	1181.42	978.56	2570.41	1228.92	258.378	Quantified					PF12234(RAVE protein 1 C terminal)
A0A1S4ERI5	A0A1S4ERI5|A0A1S4ERI5_DIACI:A0A3Q0IJI6|A0A3Q0IJI6_DIACI:A0A3Q0IQ26|A0A3Q0IQ26_DIACI:A0A3Q0IJS0|A0A3Q0IJS0_DIACI:A0A3Q0IP46|A0A3Q0IP46_DIACI	S	AISS(+79.97)GPKTPPEPHIK	4	15	Uncharacterized protein OS=Diaphorina citri OX=121845 GN=LOC108254290 PE=4 SV=1	Uncharacterized protein	LOC108254290	36.34	1637.82	-5.9	45	59	S4:Phosphorylation (STY):0.00	S48	DLKAISSGPKTPP	1881.26	1698.32	1263.37	1099.43	3063.6	2488.18	Quantified
A0A1S4ERI5	A0A1S4ERI5|A0A1S4ERI5_DIACI:A0A3Q0IJI6|A0A3Q0IJI6_DIACI:A0A3Q0IQ26|A0A3Q0IQ26_DIACI:A0A3Q0IJS0|A0A3Q0IJS0_DIACI:A0A3Q0IP46|A0A3Q0IP46_DIACI	T	AISSGPKT(+79.97)PPEPHIK	8	15	Uncharacterized protein OS=Diaphorina citri OX=121845 GN=LOC108254290 PE=4 SV=1	Uncharacterized protein	LOC108254290	55.03	1637.82	-3.7	45	59	T8:Phosphorylation (STY):10.19	T52	ISSGPKTPPEPHI	1881.26	1698.32	1263.37	2362.47	3063.6	2488.18	Quantified
Q0PWT8	Q0PWT8|Q0PWT8_DIACI:A0A1S3D1T5|A0A1S3D1T5_DIACI	T	AIT(+79.97)KELEPLK	3	10	Cytochrome c oxidase subunit 4 (Fragment) OS=Diaphorina citri OX=121845 PE=2 SV=1	Cytochrome c oxidase subunit 4 (Fragment)		39.09	1220.64	-9.2	39	48		T41	IRFKAITKELEPL	86.9389	61.9276	748.675	795.904	908.22	910.961	Quantified	GO:0016021(CC:integral component of membrane);GO:0004129(MF:cytochrome-c oxidase activity)	K02263(NA)	ko00190(Oxidative phosphorylation)	Mitochondrion inner membrane;Single-pass membrane protein	PF02936(Cytochrome c oxidase subunit IV)
A0A3Q0JE13	A0A3Q0JE13|A0A3Q0JE13_DIACI:A0A1S3DJ73|A0A1S3DJ73_DIACI	T	AIT(+79.97)PPPTTDNK	3	11	U1 small nuclear ribonucleoprotein C-like isoform X3 OS=Diaphorina citri OX=121845 GN=LOC103519423 PE=4 SV=1	U1 small nuclear ribonucleoprotein C-like isoform X3	LOC103519423	63.08	1233.56	-1.3	59	69	T3:Phosphorylation (STY):61.69	T61	SPNKAITPPPTTD	168637	180699	251047	378089	242907	181445	Quantified
A0A1S3DKC0	A0A1S3DKC0|A0A1S3DKC0_DIACI:A0A3Q0JKV0|A0A3Q0JKV0_DIACI	S	AITGGS(+79.97)DDDIVITDK	6	15	BUD13 homolog OS=Diaphorina citri OX=121845 GN=LOC103520024 PE=4 SV=1	BUD13 homolog	LOC103520024	71.49	1598.71	-0.3	95	109	S6:Phosphorylation (STY):24.24	S100	KAITGGSDDDIVI	7067.47	7670.12	6389.44	9229.8	6674.89	6600.23	Quantified
A0A3Q0J531	A0A3Q0J531|A0A3Q0J531_DIACI	S	AITSLAFC(+57.02)DVGVPLS(+79.97)PAPVPTER	15	23	Target of rapamycin complex subunit lst8 OS=Diaphorina citri OX=121845 GN=LOC103514889 PE=3 SV=1	Target of rapamycin complex subunit lst8	LOC103514889	53.06	2476.21	1.6	244	266	C8:Carbamidomethylation:1000.00;S15:Phosphorylation (STY):22.09	S258	DVGVPLSPAPVPT	275.548	472.651	168.435		557.388	548.141	Quantified	GO:0031929(BP:TOR signaling);GO:0031931(CC:TORC1 complex);GO:0031932(CC:TORC2 complex)	K08266(NA)	ko04136(Autophagy - other);ko04138(Autophagy - yeast);ko04140(Autophagy - animal);ko04150(mTOR signaling pathway);ko04151(PI3K-Akt signaling pathway)	Cytoplasm	PF00400(WD domain, G-beta repeat)
A0A1S3DSC2	A0A1S3DSC2|A0A1S3DSC2_DIACI	S	AIVGAS(+79.97)INDILAK	6	13	60S ribosomal protein L24 OS=Diaphorina citri OX=121845 GN=LOC103523531 PE=3 SV=1	60S ribosomal protein L24	LOC103523531	65.71	1363.71	-1.8	81	93		S86	RAIVGASINDILA	14061.3	25961.6	13255.2	17493.2	26749.8	14098.1	Quantified	GO:0005840(CC:ribosome)	K02896(NA)	ko03010(Ribosome)		PF01246(Ribosomal protein L24e)
A0A1S3DJS2	A0A1S3DJS2|A0A1S3DJS2_DIACI	S	AIVNSS(+79.97)SELSVSNQSM(+15.99)R	6	17	Uncharacterized protein LOC103519132 OS=Diaphorina citri OX=121845 GN=LOC103519132 PE=4 SV=1	Uncharacterized protein LOC103519132	LOC103519132	28.81	1903.83	-3.5	60	76	S6:Phosphorylation (STY):0.00;M16:Oxidation (M):1000.00	S65	RAIVNSSSELSVS	190.436	245.033	260.34	216.059	211.361	193.265	Quantified
A0A1S3DJS2	A0A1S3DJS2|A0A1S3DJS2_DIACI	S	AIVNSS(+79.97)SELSVSNQSMR	6	17	Uncharacterized protein LOC103519132 OS=Diaphorina citri OX=121845 GN=LOC103519132 PE=4 SV=1	Uncharacterized protein LOC103519132	LOC103519132	49.02	1887.84	-1.7	60	76	S6:Phosphorylation (STY):0.00	S65	RAIVNSSSELSVS	255.159	241.364	311.238	147.49	144.957	289.631	Quantified
A0A1S4EDB0	A0A1S4EDB0|A0A1S4EDB0_DIACI:A0A1S3DSL3|A0A1S3DSL3_DIACI	S	AIYES(+79.97)GVGVQYK	5	12	Uncharacterized protein LOC103510432 isoform X1 OS=Diaphorina citri OX=121845 GN=LOC103510432 PE=4 SV=1	Uncharacterized protein LOC103510432 isoform X1	LOC103510432	70.63	1392.63	-4.8	125	136	S5:Phosphorylation (STY):48.87	S129	NKAIYESGVGVQY	7669.33	7304.92	11234.6	3042.77	6005.22	4703.2	Quantified
A0A1S4EBF9	A0A1S4EBF9|A0A1S4EBF9_DIACI	T	AIYYNT(+79.97)PTSSK	6	11	Uncharacterized protein LOC108252395 OS=Diaphorina citri OX=121845 GN=LOC108252395 PE=4 SV=1	Uncharacterized protein LOC108252395	LOC108252395	29.46	1323.57	-0.4	8	18	T6:Phosphorylation (STY):14.04	T13	KAIYYNTPTSSKE	1415.26	940.576	1470.92	1092.39	859.914	543.527	Quantified	GO:0016021(CC:integral component of membrane)
A0A1S4EBF9	A0A1S4EBF9|A0A1S4EBF9_DIACI	S	AIYYNTPTSS(+79.97)K	10	11	Uncharacterized protein LOC108252395 OS=Diaphorina citri OX=121845 GN=LOC108252395 PE=4 SV=1	Uncharacterized protein LOC108252395	LOC108252395	34.92	1323.57	1	8	18	S10:Phosphorylation (STY):0.00	S17	YNTPTSSKENILN	98.0638	955.575	1470.92	1101.86	1470.68	543.527	Quantified	GO:0016021(CC:integral component of membrane)
A0A3Q0J5R5	A0A3Q0J5R5|A0A3Q0J5R5_DIACI	T	AKAT(+79.97)PPPSLTGDPILGTHK	4	19	TOM1-like protein 2 isoform X1 OS=Diaphorina citri OX=121845 GN=LOC103512928 PE=3 SV=1	TOM1-like protein 2 isoform X1	LOC103512928	60.71	1980.01	1.6	399	417	T4:Phosphorylation (STY):5.55	T402	FNKAKATPPPSLT	109.011	231.927	52.6077	473.679	1598.86	2570.48	Quantified	GO:0006886(BP:intracellular protein transport)				PF00790(VHS domain);PF03127(GAT domain)
A0A3Q0J5R5	A0A3Q0J5R5|A0A3Q0J5R5_DIACI	S	AKATPPPS(+79.97)LTGDPILGTHK	8	19	TOM1-like protein 2 isoform X1 OS=Diaphorina citri OX=121845 GN=LOC103512928 PE=3 SV=1	TOM1-like protein 2 isoform X1	LOC103512928	38.16	1980.01	-1.3	399	417	S8:Phosphorylation (STY):0.00	S406	KATPPPSLTGDPI	109.011	231.927	711.095	473.679	1598.86	2570.48	Quantified	GO:0006886(BP:intracellular protein transport)				PF00790(VHS domain);PF03127(GAT domain)
A0A1S3D8H4	A0A1S3D8H4|A0A1S3D8H4_DIACI	S	AKDVLDS(+79.97)DENS(+79.97)K	7	12	Uncharacterized protein LOC103513571 OS=Diaphorina citri OX=121845 GN=LOC103513571 PE=4 SV=1	Uncharacterized protein LOC103513571	LOC103513571	48.29	1479.55	3.8	191	202		S197	AKDVLDSDENSKE	8798.77	10033.6	8926.41	8741.96	7767.01	5635.54	Quantified
A0A1S3D8H4	A0A1S3D8H4|A0A1S3D8H4_DIACI	S	AKDVLDS(+79.97)DENS(+79.97)K	11	12	Uncharacterized protein LOC103513571 OS=Diaphorina citri OX=121845 GN=LOC103513571 PE=4 SV=1	Uncharacterized protein LOC103513571	LOC103513571	48.29	1479.55	3.8	191	202		S201	LDSDENSKEKGVV	8798.77	10033.6	8926.41	8741.96	7767.01	5635.54	Quantified
A0A1S3D8H4	A0A1S3D8H4|A0A1S3D8H4_DIACI	S	AKDVLDS(+79.97)DENS(+79.97)KEK	7	14	Uncharacterized protein LOC103513571 OS=Diaphorina citri OX=121845 GN=LOC103513571 PE=4 SV=1	Uncharacterized protein LOC103513571	LOC103513571	59.38	1736.69	3.4	191	204		S197	AKDVLDSDENSKE	2426.78	2725.16	5853.8	15141.4	16595	5102.14	Quantified
A0A1S3D8H4	A0A1S3D8H4|A0A1S3D8H4_DIACI	S	AKDVLDS(+79.97)DENS(+79.97)KEK	11	14	Uncharacterized protein LOC103513571 OS=Diaphorina citri OX=121845 GN=LOC103513571 PE=4 SV=1	Uncharacterized protein LOC103513571	LOC103513571	59.38	1736.69	3.4	191	204		S201	LDSDENSKEKGVV	2426.78	2725.16	5853.8	15141.4	16595	5102.14	Quantified
A0A1S3DAJ3	A0A1S3DAJ3|A0A1S3DAJ3_DIACI	S	AKGDLS(+79.97)LDLDQLDC(+57.02)AC(+57.02)K	6	17	Uncharacterized protein LOC103514595 isoform X1 OS=Diaphorina citri OX=121845 GN=LOC103514595 PE=4 SV=1	Uncharacterized protein LOC103514595 isoform X1	LOC103514595	40.37	2000.86	1.1	138	154	C14:Carbamidomethylation:1000.00;C16:Carbamidomethylation:1000.00	S143	KAKGDLSLDLDQL	4602.65	8598.61	8395.93	95.2391	2721.98	2640.7	Quantified
A0A3Q0IN52	A0A3Q0IN52|A0A3Q0IN52_DIACI	S	AKHDIVTESQLPDS(+79.97)MSAEK	14	19	LOW QUALITY PROTEIN: titin OS=Diaphorina citri OX=121845 GN=LOC103524768 PE=4 SV=1	LOW QUALITY PROTEIN: titin	LOC103524768	39.44	2164.97	4.4	3627	3645	S14:Phosphorylation (STY):5.03	S3640	ESQLPDSMSAEKL	1598.4	131.367	176.596	197.28	435.869	601.341	Quantified					PF07679(Immunoglobulin I-set domain);PF06582(Repeat of unknown function (DUF1136))
A0A3Q0IN52	A0A3Q0IN52|A0A3Q0IN52_DIACI	S	AKHDIVTESQLPDSMS(+79.97)AEK	16	19	LOW QUALITY PROTEIN: titin OS=Diaphorina citri OX=121845 GN=LOC103524768 PE=4 SV=1	LOW QUALITY PROTEIN: titin	LOC103524768	50.22	2164.97	2.4	3627	3645	S16:Phosphorylation (STY):0.00	S3642	QLPDSMSAEKLKE	379.091	131.367	176.596	443.188	435.869	175.764	Quantified					PF07679(Immunoglobulin I-set domain);PF06582(Repeat of unknown function (DUF1136))
A0A3Q0JIR1	A0A3Q0JIR1|A0A3Q0JIR1_DIACI	S	AKIS(+79.97)DIVMGAEPNVSAR	4	17	Cytospin-A-like OS=Diaphorina citri OX=121845 GN=LOC113471793 PE=4 SV=1	Cytospin-A-like	LOC113471793	53.38	1836.88	-4.4	135	151	S4:Phosphorylation (STY):108.98	S138	AKRAKISDIVMGA	1042.06	1305.58	793.792	1781.17	1637.53	1521.08	Quantified	GO:0045104(BP:intermediate filament cytoskeleton organization)				PF00307(Calponin homology (CH) domain)
A0A3Q0IN52	A0A3Q0IN52|A0A3Q0IN52_DIACI	S	AKNSVGEAVTTC(+57.02)SVS(+79.97)VISNAGLQLGTLDEDR	15	31	LOW QUALITY PROTEIN: titin OS=Diaphorina citri OX=121845 GN=LOC103524768 PE=4 SV=1	LOW QUALITY PROTEIN: titin	LOC103524768	33.87	3270.54	2.3	2053	2083	C12:Carbamidomethylation:1000.00;S15:Phosphorylation (STY):0.00	S2067	VTTCSVSVISNAG	64.7303	188.653	133.636		768.857	158.802	Quantified					PF07679(Immunoglobulin I-set domain);PF06582(Repeat of unknown function (DUF1136))
A0A3Q0IWW6	A0A3Q0IWW6|A0A3Q0IWW6_DIACI	S	AKPGDIGVS(+79.97)PK	9	11	Kinesin-like protein KIF21A OS=Diaphorina citri OX=121845 GN=LOC113468188 PE=3 SV=1	Kinesin-like protein KIF21A	LOC113468188	42.06	1147.56	4.3	534	544		S542	PGDIGVSPKAAKI	1186.92	1194.29	510.961	3275.64	1439.09	763.93	Quantified	GO:0007018(BP:microtubule-based movement);GO:0005524(MF:ATP binding);GO:0008017(MF:microtubule binding);GO:0003777(MF:microtubule motor activity)				PF00400(WD domain, G-beta repeat);PF00225(Kinesin motor domain)
A0A3Q0IJI6	A0A3Q0IJI6|A0A3Q0IJI6_DIACI:A0A3Q0IQ26|A0A3Q0IQ26_DIACI:A0A3Q0IJS0|A0A3Q0IJS0_DIACI:A0A3Q0IP46|A0A3Q0IP46_DIACI	S	AKPVAIIDLDVS(+79.97)PFR	12	15	PHD and RING finger domain-containing protein 1 isoform X2 OS=Diaphorina citri OX=121845 GN=LOC103505274 PE=4 SV=1	PHD and RING finger domain-containing protein 1 isoform X2	LOC103505274	40.74	1719.9	-3.8	1624	1638		S1635	IIDLDVSPFRERT		108.661	96.1738	37.633	303.044	43.9525	Quantified	GO:0046872(MF:metal ion binding)				PF13639(Ring finger domain);PF00628(PHD-finger)
A0A3Q0J428	A0A3Q0J428|A0A3Q0J428_DIACI	S	AKS(+79.97)AAVVEDIQR	3	12	Diacylglycerol O-acyltransferase 1-like OS=Diaphorina citri OX=121845 GN=LOC103512083 PE=4 SV=1	Diacylglycerol O-acyltransferase 1-like	LOC103512083	72.54	1365.67	1.4	12	23		S14	KLRRAKSAAVVED	2033.88	6204.34	3940.93	10917.9	13692.9	9581.51	Quantified	GO:0016021(CC:integral component of membrane);GO:0016746(MF:transferase activity, transferring acyl groups)
A0A3Q0JD32	A0A3Q0JD32|A0A3Q0JD32_DIACI	S	AKS(+79.97)DGSLASSSGTQAASSPLSK	3	22	Patj homolog OS=Diaphorina citri OX=121845 GN=LOC113470420 PE=4 SV=1	Patj homolog	LOC113470420	58.5	2115.97	-7	553	574	S3:Phosphorylation (STY):0.00	S555	RLVKAKSDGSLAS	1515.91	235.876	817.167	1554.36	2980.78	2866.99	Quantified					PF00595(PDZ domain (Also known as DHR or GLGF))
A0A3Q0IQ73	A0A3Q0IQ73|A0A3Q0IQ73_DIACI	S	AKS(+79.97)FSQGSPVLLADK	3	15	Uncharacterized protein LOC103505336 OS=Diaphorina citri OX=121845 GN=LOC103505336 PE=4 SV=1	Uncharacterized protein LOC103505336	LOC103505336	51.11	1626.8	5.7	1071	1085	S3:Phosphorylation (STY):4.64	S1073	SKKKAKSFSQGSP	635.673	450.201	308.598	666.848	404.368	366.175	Quantified
A0A1S3DM23	A0A1S3DM23|A0A1S3DM23_DIACI	S	AKS(+79.97)IVFHR	3	8	GTP-binding nuclear protein OS=Diaphorina citri OX=121845 GN=LOC103520939 PE=3 SV=1	GTP-binding nuclear protein	LOC103520939	32.55	1036.52	-1.8	132	139		S134	RKVKAKSIVFHRK	57.0787	920.655	351.243	632.837	709.992	813.365	Quantified	GO:0006913(BP:nucleocytoplasmic transport);GO:0015031(BP:protein transport);GO:0005634(CC:nucleus);GO:0005525(MF:GTP binding);GO:0003924(MF:GTPase activity)	K07936(NA)	ko03008(Ribosome biogenesis in eukaryotes);ko03013(Nucleocytoplasmic transport);ko03250(Viral life cycle - HIV-1)	Nucleus	PF00071(Ras family)
A0A3Q0IJM2	A0A3Q0IJM2|A0A3Q0IJM2_DIACI:A0A3Q0IQ57|A0A3Q0IQ57_DIACI	S	AKS(+79.97)PAMMLAAEK	3	12	33 kDa inner dynein arm light chain, axonemal-like isoform X2 OS=Diaphorina citri OX=121845 GN=LOC113465305 PE=4 SV=1	33 kDa inner dynein arm light chain, axonemal-like isoform X2	LOC113465305	31.47	1326.61	3.1	33	44		S35	GATKAKSPAMMLA	123.607	193.432	170.634	78.2246	186.238	59.1195	Quantified		K10410(NA)	ko04814(Motor proteins)		PF10211(Axonemal dynein light chain)
A0A3Q0J6G2	A0A3Q0J6G2|A0A3Q0J6G2_DIACI	S	AKS(+79.97)QLYPDR	3	9	very-long-chain enoyl-CoA reductase OS=Diaphorina citri OX=121845 GN=LOC103515585 PE=3 SV=1	very-long-chain enoyl-CoA reductase	LOC103515585	27.06	1156.53	-6.6	36	44	S3:Phosphorylation (STY):26.52	S38	EVHKAKSQLYPDR	933.303	76.0266	19553.9		131.649		Quantified	GO:0006629(BP:lipid metabolic process);GO:0016021(CC:integral component of membrane);GO:0016627(MF:oxidoreductase activity, acting on the CH-CH group of donors)	K10258(NA)	ko00062(Fatty acid elongation);ko01040(Biosynthesis of unsaturated fatty acids)	Endoplasmic reticulum membrane;Multi-pass membrane protein;Membrane	PF00240(Ubiquitin family);PF02544(3-oxo-5-alpha-steroid 4-dehydrogenase)
A0A3Q0IQQ5	A0A3Q0IQQ5|A0A3Q0IQQ5_DIACI	S	AKS(+79.97)VS(+79.97)RSPS(+79.97)PS(+79.97)K	3	12	Serine-arginine protein 55 OS=Diaphorina citri OX=121845 GN=LOC103508148 PE=4 SV=1	Serine-arginine protein 55	LOC103508148	24.71	1549.54	0.8	233	244	S3:Phosphorylation (STY):14.19;S5:Phosphorylation (STY):4.64;S9:Phosphorylation (STY):0.00;S11:Phosphorylation (STY):0.00	S235	SKSKAKSVSRSPS	1047.19	2020.64	2413.23	4177.04	1063.77	3761.42	Quantified	GO:0003723(MF:RNA binding)	K12893(NA)	ko03040(Spliceosome)		PF00076(RNA recognition motif. (a.k.a. RRM, RBD, or RNP domain))
A0A3Q0IQQ5	A0A3Q0IQQ5|A0A3Q0IQQ5_DIACI	S	AKS(+79.97)VS(+79.97)RSPS(+79.97)PS(+79.97)K	5	12	Serine-arginine protein 55 OS=Diaphorina citri OX=121845 GN=LOC103508148 PE=4 SV=1	Serine-arginine protein 55	LOC103508148	24.71	1549.54	0.8	233	244	S3:Phosphorylation (STY):14.19;S5:Phosphorylation (STY):4.64;S9:Phosphorylation (STY):0.00;S11:Phosphorylation (STY):0.00	S237	SKAKSVSRSPSPS	1047.19	2020.64	2413.23	4177.04	1063.77	3761.42	Quantified	GO:0003723(MF:RNA binding)	K12893(NA)	ko03040(Spliceosome)		PF00076(RNA recognition motif. (a.k.a. RRM, RBD, or RNP domain))
A0A3Q0IQQ5	A0A3Q0IQQ5|A0A3Q0IQQ5_DIACI	S	AKS(+79.97)VS(+79.97)RSPS(+79.97)PS(+79.97)K	9	12	Serine-arginine protein 55 OS=Diaphorina citri OX=121845 GN=LOC103508148 PE=4 SV=1	Serine-arginine protein 55	LOC103508148	24.71	1549.54	0.8	233	244	S3:Phosphorylation (STY):14.19;S5:Phosphorylation (STY):4.64;S9:Phosphorylation (STY):0.00;S11:Phosphorylation (STY):0.00	S241	SVSRSPSPSKTRK	1047.19	2020.64	2413.23	4177.04	1063.77	3761.42	Quantified	GO:0003723(MF:RNA binding)	K12893(NA)	ko03040(Spliceosome)		PF00076(RNA recognition motif. (a.k.a. RRM, RBD, or RNP domain))
A0A3Q0IQQ5	A0A3Q0IQQ5|A0A3Q0IQQ5_DIACI	S	AKS(+79.97)VS(+79.97)RSPS(+79.97)PS(+79.97)K	11	12	Serine-arginine protein 55 OS=Diaphorina citri OX=121845 GN=LOC103508148 PE=4 SV=1	Serine-arginine protein 55	LOC103508148	24.71	1549.54	0.8	233	244	S3:Phosphorylation (STY):14.19;S5:Phosphorylation (STY):4.64;S9:Phosphorylation (STY):0.00;S11:Phosphorylation (STY):0.00	S243	SRSPSPSKTRKRS	1047.19	2020.64	2413.23	4177.04	1063.77	3761.42	Quantified	GO:0003723(MF:RNA binding)	K12893(NA)	ko03040(Spliceosome)		PF00076(RNA recognition motif. (a.k.a. RRM, RBD, or RNP domain))
A0A3Q0JD32	A0A3Q0JD32|A0A3Q0JD32_DIACI	S	AKSDGS(+79.97)LASSSGTQAASSPLSK	6	22	Patj homolog OS=Diaphorina citri OX=121845 GN=LOC113470420 PE=4 SV=1	Patj homolog	LOC113470420	52.29	2115.97	-4.4	553	574	S6:Phosphorylation (STY):0.00	S558	KAKSDGSLASSSG	1515.91	90.0516	817.167	747.994	1613.53	2103.17	Quantified					PF00595(PDZ domain (Also known as DHR or GLGF))
A0A3Q0JD32	A0A3Q0JD32|A0A3Q0JD32_DIACI	T	AKSDGSLASSSGT(+79.97)QAASSPLSK	13	22	Patj homolog OS=Diaphorina citri OX=121845 GN=LOC113470420 PE=4 SV=1	Patj homolog	LOC113470420	33.39	2115.97	-0.1	553	574	T13:Phosphorylation (STY):7.40	T565	LASSSGTQAASSP	7276.35	625.632	8563.57	4967.23	3317.65	4006.55	Quantified					PF00595(PDZ domain (Also known as DHR or GLGF))
A0A3Q0ISQ3	A0A3Q0ISQ3|A0A3Q0ISQ3_DIACI	S	AKTETSEDGEESSIQDEEDDAS(+79.97)IAEILANVK	22	31	Fibronectin type-III domain-containing protein 3A-like OS=Diaphorina citri OX=121845 GN=LOC103509063 PE=4 SV=1	Fibronectin type-III domain-containing protein 3A-like	LOC103509063	32.39	3402.47	4.7	121	151	S22:Phosphorylation (STY):0.91	S142	DEEDDASIAEILA	809.404	288.115	502.563		1101.11	433.869	Quantified	GO:0016021(CC:integral component of membrane)				PF00041(Fibronectin type III domain)
A0A1S4E9T0	A0A1S4E9T0|A0A1S4E9T0_DIACI:A0A1S4EA30|A0A1S4EA30_DIACI	S	ALAAAES(+79.97)EVAALNR	7	14	Tropomyosin-1 isoform X2 OS=Diaphorina citri OX=121845 GN=LOC103507752 PE=3 SV=1	Tropomyosin-1 isoform X2	LOC103507752	72.21	1464.7	1.7	77	90		S83	ALAAAESEVAALN	847.29	1090.45	861.353	457.98	784.604	148.705	Quantified		K10373(NA)	ko04814(Motor proteins)		PF00261(Tropomyosin)
A0A3Q0J1A4	A0A3Q0J1A4|A0A3Q0J1A4_DIACI	S	ALAAES(+79.97)SSDT(+79.97)ESIDK	6	15	Ras-related GTP-binding protein C OS=Diaphorina citri OX=121845 GN=LOC103513181 PE=3 SV=1	Ras-related GTP-binding protein C	LOC103513181	56.76	1682.63	-1.3	496	510	S6:Phosphorylation (STY):0.00;T10:Phosphorylation (STY):0.00	S501	KALAAESSSDTES	819.238	907.352	181.778	531.085	609.337	915.772	Quantified	GO:0005525(MF:GTP binding)				PF04670(Gtr1/RagA G protein conserved region)
A0A3Q0J1A4	A0A3Q0J1A4|A0A3Q0J1A4_DIACI	T	ALAAES(+79.97)SSDT(+79.97)ESIDK	10	15	Ras-related GTP-binding protein C OS=Diaphorina citri OX=121845 GN=LOC103513181 PE=3 SV=1	Ras-related GTP-binding protein C	LOC103513181	56.76	1682.63	-1.3	496	510	S6:Phosphorylation (STY):0.00;T10:Phosphorylation (STY):0.00	T505	AESSSDTESIDKV	819.238	907.352	181.778	531.085	609.337	915.772	Quantified	GO:0005525(MF:GTP binding)				PF04670(Gtr1/RagA G protein conserved region)
A0A3Q0J1A4	A0A3Q0J1A4|A0A3Q0J1A4_DIACI	S	ALAAES(+79.97)SSDTES(+79.97)IDK	6	15	Ras-related GTP-binding protein C OS=Diaphorina citri OX=121845 GN=LOC103513181 PE=3 SV=1	Ras-related GTP-binding protein C	LOC103513181	46.2	1682.63	5.8	496	510	S6:Phosphorylation (STY):0.00;S12:Phosphorylation (STY):14.04	S501	KALAAESSSDTES	36.8441	597.306	2172.32	2712.86	1948.33	467.14	Quantified	GO:0005525(MF:GTP binding)				PF04670(Gtr1/RagA G protein conserved region)
A0A3Q0J1A4	A0A3Q0J1A4|A0A3Q0J1A4_DIACI	S	ALAAES(+79.97)SSDTES(+79.97)IDK	12	15	Ras-related GTP-binding protein C OS=Diaphorina citri OX=121845 GN=LOC103513181 PE=3 SV=1	Ras-related GTP-binding protein C	LOC103513181	46.2	1682.63	5.8	496	510	S6:Phosphorylation (STY):0.00;S12:Phosphorylation (STY):14.04	S507	SSSDTESIDKVAT	36.8441	597.306	2172.32	2712.86	1948.33	467.14	Quantified	GO:0005525(MF:GTP binding)				PF04670(Gtr1/RagA G protein conserved region)
A0A3Q0J1A4	A0A3Q0J1A4|A0A3Q0J1A4_DIACI	S	ALAAESS(+79.97)S(+79.97)DTESIDK	7	15	Ras-related GTP-binding protein C OS=Diaphorina citri OX=121845 GN=LOC103513181 PE=3 SV=1	Ras-related GTP-binding protein C	LOC103513181	27.45	1682.63	3.2	496	510	S7:Phosphorylation (STY):0.00;S8:Phosphorylation (STY):0.00	S502	ALAAESSSDTESI	819.238	221.02	181.778	202.529	200.892	915.772	Quantified	GO:0005525(MF:GTP binding)				PF04670(Gtr1/RagA G protein conserved region)
A0A3Q0J1A4	A0A3Q0J1A4|A0A3Q0J1A4_DIACI	S	ALAAESS(+79.97)S(+79.97)DTESIDK	8	15	Ras-related GTP-binding protein C OS=Diaphorina citri OX=121845 GN=LOC103513181 PE=3 SV=1	Ras-related GTP-binding protein C	LOC103513181	27.45	1682.63	3.2	496	510	S7:Phosphorylation (STY):0.00;S8:Phosphorylation (STY):0.00	S503	LAAESSSDTESID	819.238	221.02	181.778	202.529	200.892	915.772	Quantified	GO:0005525(MF:GTP binding)				PF04670(Gtr1/RagA G protein conserved region)
A0A3Q0J1A4	A0A3Q0J1A4|A0A3Q0J1A4_DIACI	S	ALAAESS(+79.97)SDTES(+79.97)IDK	7	15	Ras-related GTP-binding protein C OS=Diaphorina citri OX=121845 GN=LOC103513181 PE=3 SV=1	Ras-related GTP-binding protein C	LOC103513181	42.28	1682.63	-0.8	496	510	S7:Phosphorylation (STY):0.00;S12:Phosphorylation (STY):4.64	S502	ALAAESSSDTESI	1389.84	2305.51	2172.32	1780.48	1799.71	1782.6	Quantified	GO:0005525(MF:GTP binding)				PF04670(Gtr1/RagA G protein conserved region)
A0A3Q0J1A4	A0A3Q0J1A4|A0A3Q0J1A4_DIACI	S	ALAAESS(+79.97)SDTES(+79.97)IDK	12	15	Ras-related GTP-binding protein C OS=Diaphorina citri OX=121845 GN=LOC103513181 PE=3 SV=1	Ras-related GTP-binding protein C	LOC103513181	42.28	1682.63	-0.8	496	510	S7:Phosphorylation (STY):0.00;S12:Phosphorylation (STY):4.64	S507	SSSDTESIDKVAT	1389.84	2305.51	2172.32	1780.48	1799.71	1782.6	Quantified	GO:0005525(MF:GTP binding)				PF04670(Gtr1/RagA G protein conserved region)
A0A3Q0J1A4	A0A3Q0J1A4|A0A3Q0J1A4_DIACI	S	ALAAESS(+79.97)SDTESIDK	7	15	Ras-related GTP-binding protein C OS=Diaphorina citri OX=121845 GN=LOC103513181 PE=3 SV=1	Ras-related GTP-binding protein C	LOC103513181	61.68	1602.67	-9.7	496	510	S7:Phosphorylation (STY):14.02	S502	ALAAESSSDTESI	13058.6	14112.6	25264.6	16540.8	12246	11720.8	Quantified	GO:0005525(MF:GTP binding)				PF04670(Gtr1/RagA G protein conserved region)
A0A3Q0J1A4	A0A3Q0J1A4|A0A3Q0J1A4_DIACI	S	ALAAESSS(+79.97)DTES(+79.97)IDK	8	15	Ras-related GTP-binding protein C OS=Diaphorina citri OX=121845 GN=LOC103513181 PE=3 SV=1	Ras-related GTP-binding protein C	LOC103513181	56.56	1682.63	10.6	496	510	S8:Phosphorylation (STY):6.59;S12:Phosphorylation (STY):26.31	S503	LAAESSSDTESID	1389.84	2305.51	192.117	38.5988	317.323	1782.6	Quantified	GO:0005525(MF:GTP binding)				PF04670(Gtr1/RagA G protein conserved region)
A0A3Q0J1A4	A0A3Q0J1A4|A0A3Q0J1A4_DIACI	S	ALAAESSS(+79.97)DTES(+79.97)IDK	12	15	Ras-related GTP-binding protein C OS=Diaphorina citri OX=121845 GN=LOC103513181 PE=3 SV=1	Ras-related GTP-binding protein C	LOC103513181	56.56	1682.63	10.6	496	510	S8:Phosphorylation (STY):6.59;S12:Phosphorylation (STY):26.31	S507	SSSDTESIDKVAT	1389.84	2305.51	192.117	38.5988	317.323	1782.6	Quantified	GO:0005525(MF:GTP binding)				PF04670(Gtr1/RagA G protein conserved region)
A0A3Q0J1A4	A0A3Q0J1A4|A0A3Q0J1A4_DIACI	S	ALAAESSS(+79.97)DTESIDK	8	15	Ras-related GTP-binding protein C OS=Diaphorina citri OX=121845 GN=LOC103513181 PE=3 SV=1	Ras-related GTP-binding protein C	LOC103513181	70.47	1602.67	7.4	496	510	S8:Phosphorylation (STY):24.44	S503	LAAESSSDTESID	13058.6	14112.6	25264.6	16540.8	870.671	11720.8	Quantified	GO:0005525(MF:GTP binding)				PF04670(Gtr1/RagA G protein conserved region)
A0A3Q0J1A4	A0A3Q0J1A4|A0A3Q0J1A4_DIACI	S	ALAAESSSDTES(+79.97)IDK	12	15	Ras-related GTP-binding protein C OS=Diaphorina citri OX=121845 GN=LOC103513181 PE=3 SV=1	Ras-related GTP-binding protein C	LOC103513181	57.2	1602.67	4.4	496	510	S12:Phosphorylation (STY):6.59	S507	SSSDTESIDKVAT	3005.11	680.859	85.8245	2650.64	1075.09	2070.21	Quantified	GO:0005525(MF:GTP binding)				PF04670(Gtr1/RagA G protein conserved region)
A0A3Q0JAL1	A0A3Q0JAL1|A0A3Q0JAL1_DIACI	T	ALAALSAEGYT(+79.97)SPEPGK	11	17	Nesprin-1-like OS=Diaphorina citri OX=121845 GN=LOC103517667 PE=4 SV=1	Nesprin-1-like	LOC103517667	74.27	1740.8	1.4	122	138	T11:Phosphorylation (STY):14.02	T132	LSAEGYTSPEPGK	28471.8	39022.8	48992	5321.76	22476.6	19738	Quantified	GO:0003779(MF:actin binding)				PF00307(Calponin homology (CH) domain);PF00435(Spectrin repeat)
A0A3Q0JAL1	A0A3Q0JAL1|A0A3Q0JAL1_DIACI	T	ALAALSAEGYT(+79.97)SPEPGKK	11	18	Nesprin-1-like OS=Diaphorina citri OX=121845 GN=LOC103517667 PE=4 SV=1	Nesprin-1-like	LOC103517667	74.13	1868.89	3.1	122	139	T11:Phosphorylation (STY):0.00	T132	LSAEGYTSPEPGK	30593	79713	149375	10562.2	73236.2	58897.7	Quantified	GO:0003779(MF:actin binding)				PF00307(Calponin homology (CH) domain);PF00435(Spectrin repeat)
A0A3Q0JAL1	A0A3Q0JAL1|A0A3Q0JAL1_DIACI	S	ALAALSAEGYTS(+79.97)PEPGK	12	17	Nesprin-1-like OS=Diaphorina citri OX=121845 GN=LOC103517667 PE=4 SV=1	Nesprin-1-like	LOC103517667	77.05	1740.8	4.4	122	138	S12:Phosphorylation (STY):33.98	S133	SAEGYTSPEPGKK	28471.8	39022.8	48992	5321.76	22476.6	19738	Quantified	GO:0003779(MF:actin binding)				PF00307(Calponin homology (CH) domain);PF00435(Spectrin repeat)
A0A3Q0JAL1	A0A3Q0JAL1|A0A3Q0JAL1_DIACI	S	ALAALSAEGYTS(+79.97)PEPGKK	12	18	Nesprin-1-like OS=Diaphorina citri OX=121845 GN=LOC103517667 PE=4 SV=1	Nesprin-1-like	LOC103517667	78.86	1868.89	3.1	122	139	S12:Phosphorylation (STY):30.46	S133	SAEGYTSPEPGKK	56998.8	79713	149686	1001.19	74079.8	59422.7	Quantified	GO:0003779(MF:actin binding)				PF00307(Calponin homology (CH) domain);PF00435(Spectrin repeat)
A0A1S4ENW8	A0A1S4ENW8|A0A1S4ENW8_DIACI	T	ALADKDT(+79.97)NEFNK	7	12	Uncharacterized protein LOC108253778 OS=Diaphorina citri OX=121845 GN=LOC108253778 PE=4 SV=2	Uncharacterized protein LOC108253778	LOC108253778	67.96	1444.62	-1.3	965	976		T971	ALADKDTNEFNKE	45355.4	51007.6	32931.1	56283.1	28139.6	22313.4	Quantified
A0A1S4ENW8	A0A1S4ENW8|A0A1S4ENW8_DIACI	T	ALADKDT(+79.97)NEFNKEVQS(+79.97)GLER	7	20	Uncharacterized protein LOC108253778 OS=Diaphorina citri OX=121845 GN=LOC108253778 PE=4 SV=2	Uncharacterized protein LOC108253778	LOC108253778	45.18	2423.04	-3.2	965	984		T971	ALADKDTNEFNKE	9990.54	5528.04	5518.6	1175.89	10414.8	8723.93	Quantified
A0A1S4ENW8	A0A1S4ENW8|A0A1S4ENW8_DIACI	S	ALADKDT(+79.97)NEFNKEVQS(+79.97)GLER	16	20	Uncharacterized protein LOC108253778 OS=Diaphorina citri OX=121845 GN=LOC108253778 PE=4 SV=2	Uncharacterized protein LOC108253778	LOC108253778	45.18	2423.04	-3.2	965	984		S980	FNKEVQSGLERIS	9990.54	5528.04	5518.6	1175.89	10414.8	8723.93	Quantified
A0A3Q0JG04	A0A3Q0JG04|A0A3Q0JG04_DIACI:A0A1S4EMG8|A0A1S4EMG8_DIACI	T	ALAQVPIGT(+79.97)PISAEQLAYEDHIHR	9	24	Uncharacterized protein LOC103518349 OS=Diaphorina citri OX=121845 GN=LOC103518349 PE=4 SV=1	Uncharacterized protein LOC103518349	LOC103518349	40.26	2708.33	0.7	324	347	T9:Phosphorylation (STY):6.63	T332	AQVPIGTPISAEQ	80.0062	281.895	329.958		79.2404	151.83	Quantified	GO:0016757(MF:transferase activity, transferring glycosyl groups)	K00750(NA)	ko00500(Starch and sucrose metabolism)		PF01501(Glycosyl transferase family 8)
A0A3Q0II31	A0A3Q0II31|A0A3Q0II31_DIACI	S	ALAS(+79.97)SMTDVPR	4	11	LIM domain and actin-binding protein 1 OS=Diaphorina citri OX=121845 GN=LOC103524787 PE=4 SV=1	LIM domain and actin-binding protein 1	LOC103524787	29.19	1226.54	0	14	24	S4:Phosphorylation (STY):0.00	S17	SKKALASSMTDVP	61.1667	2959.48	4001.58	2653.16	1932	762.32	Quantified	GO:0046872(MF:metal ion binding)				PF00412(LIM domain)
A0A3Q0IQN1	A0A3Q0IQN1|A0A3Q0IQN1_DIACI	S	ALAS(+79.97)VTITKPS	4	11	LOW QUALITY PROTEIN: cilia- and flagella-associated protein 57 OS=Diaphorina citri OX=121845 GN=LOC103508041 PE=4 SV=1	LOW QUALITY PROTEIN: cilia- and flagella-associated protein 57	LOC103508041	44.63	1166.59	-1.6	1317	1327	S4:Phosphorylation (STY):32.28	S1320	ESKALASVTITKP	550.825	464.698	1074.07	329.585	501.628	300.858	Quantified	GO:0031514(CC:motile cilium)				PF00400(WD domain, G-beta repeat)
A0A3Q0II31	A0A3Q0II31|A0A3Q0II31_DIACI	S	ALASS(+79.97)M(+15.99)TDVPR	5	11	LIM domain and actin-binding protein 1 OS=Diaphorina citri OX=121845 GN=LOC103524787 PE=4 SV=1	LIM domain and actin-binding protein 1	LOC103524787	39.68	1242.53	1.3	14	24	S5:Phosphorylation (STY):14.02;M6:Oxidation (M):1000.00	S18	KKALASSMTDVPR	1434	624.688	1310.23	1626.07	1036.59	1645.11	Quantified	GO:0046872(MF:metal ion binding)				PF00412(LIM domain)
A0A3Q0II31	A0A3Q0II31|A0A3Q0II31_DIACI	S	ALASS(+79.97)MTDVPR	5	11	LIM domain and actin-binding protein 1 OS=Diaphorina citri OX=121845 GN=LOC103524787 PE=4 SV=1	LIM domain and actin-binding protein 1	LOC103524787	56.11	1226.54	-1.8	14	24	S5:Phosphorylation (STY):20.92	S18	KKALASSMTDVPR	3274.7	1742.34	2545.96	2653.16	1932	2731.89	Quantified	GO:0046872(MF:metal ion binding)				PF00412(LIM domain)
A0A3Q0J7U1	A0A3Q0J7U1|A0A3Q0J7U1_DIACI	T	ALDFLDEYNDDDGDT(+79.97)LSQEEK	15	21	Uncharacterized protein LOC103516310 OS=Diaphorina citri OX=121845 GN=LOC103516310 PE=4 SV=1	Uncharacterized protein LOC103516310	LOC103516310	34.38	2510.98	5	539	559	T15:Phosphorylation (STY):0.00	T553	NDDDGDTLSQEEK	88.5164	617.416	1239.69	723.808	357.837	683.587	Quantified
A0A3Q0J7U1	A0A3Q0J7U1|A0A3Q0J7U1_DIACI	S	ALDFLDEYNDDDGDTLS(+79.97)QEEK	17	21	Uncharacterized protein LOC103516310 OS=Diaphorina citri OX=121845 GN=LOC103516310 PE=4 SV=1	Uncharacterized protein LOC103516310	LOC103516310	49.12	2510.98	5.6	539	559	S17:Phosphorylation (STY):14.04	S555	DDGDTLSQEEKDR	2236.52	1089.81	1239.69	1992.91	816.738	2155.38	Quantified
A0A3Q0IJJ7	A0A3Q0IJJ7|A0A3Q0IJJ7_DIACI	S	ALDFPASSSFGGRPGS(+79.97)PGGR	16	20	RNA-binding protein Nova-2-like OS=Diaphorina citri OX=121845 GN=LOC103505368 PE=4 SV=1	RNA-binding protein Nova-2-like	LOC103505368	49.45	1998.89	3	322	341	S16:Phosphorylation (STY):16.15	S337	FGGRPGSPGGRNY	56851.8	78100.8	88219.7	28766.5	60548.9	50423	Quantified	GO:0000398(BP:mRNA splicing, via spliceosome);GO:0003723(MF:RNA binding)				PF00013(KH domain)
A0A1S3D0H6	A0A1S3D0H6|A0A1S3D0H6_DIACI	S	ALDS(+79.97)EEM(+15.99)EHFAAAEK	4	15	Protein-L-isoaspartate O-methyltransferase-like OS=Diaphorina citri OX=121845 GN=LOC103508052 PE=3 SV=1	Protein-L-isoaspartate O-methyltransferase-like	LOC103508052	39.43	1772.7	0.6	296	310		S299	MGKALDSEEMEHF	5081.85	4214.66	2451.92	2845.31	3015.16	3570.86	Quantified	GO:0004719(MF:protein-L-isoaspartate (D-aspartate) O-methyltransferase activity)				PF01135(Protein-L-isoaspartate(D-aspartate) O-methyltransferase (PCMT))
A0A1S3D0H6	A0A1S3D0H6|A0A1S3D0H6_DIACI	S	ALDS(+79.97)EEMEHFAAAEK	4	15	Protein-L-isoaspartate O-methyltransferase-like OS=Diaphorina citri OX=121845 GN=LOC103508052 PE=3 SV=1	Protein-L-isoaspartate O-methyltransferase-like	LOC103508052	71.57	1756.7	2.4	296	310		S299	MGKALDSEEMEHF	13565.4	17413.3	10028.4	97.9774	9233.81	7099.07	Quantified	GO:0004719(MF:protein-L-isoaspartate (D-aspartate) O-methyltransferase activity)				PF01135(Protein-L-isoaspartate(D-aspartate) O-methyltransferase (PCMT))
A0A3Q0JAF9	A0A3Q0JAF9|A0A3Q0JAF9_DIACI	S	ALES(+79.97)AIAPIVIFAT(+79.97)NR	4	16	RuvB-like helicase OS=Diaphorina citri OX=121845 GN=LOC103517570 PE=3 SV=1	RuvB-like helicase	LOC103517570	25.34	1844.88	9.1	264	279		S267	LHRALESAIAPIV	12192.3	11032.2	10080.1	19183.6	11292.1	10533.7	Quantified	GO:0006325(BP:chromatin organization);GO:0006281(BP:DNA repair);GO:0031011(CC:Ino80 complex);GO:0035267(CC:NuA4 histone acetyltransferase complex);GO:0097255(CC:R2TP complex);GO:0043139(MF:5'-3' DNA helicase activity);GO:0005524(MF:ATP binding)	K04499(NA)	ko03082(ATP-dependent chromatin remodeling);ko04310(Wnt signaling pathway)	Nucleus	PF06068(TIP49 C-terminus)
A0A3Q0JAF9	A0A3Q0JAF9|A0A3Q0JAF9_DIACI	T	ALES(+79.97)AIAPIVIFAT(+79.97)NR	14	16	RuvB-like helicase OS=Diaphorina citri OX=121845 GN=LOC103517570 PE=3 SV=1	RuvB-like helicase	LOC103517570	25.34	1844.88	9.1	264	279		T277	PIVIFATNRGRCL	12192.3	11032.2	10080.1	19183.6	11292.1	10533.7	Quantified	GO:0006325(BP:chromatin organization);GO:0006281(BP:DNA repair);GO:0031011(CC:Ino80 complex);GO:0035267(CC:NuA4 histone acetyltransferase complex);GO:0097255(CC:R2TP complex);GO:0043139(MF:5'-3' DNA helicase activity);GO:0005524(MF:ATP binding)	K04499(NA)	ko03082(ATP-dependent chromatin remodeling);ko04310(Wnt signaling pathway)	Nucleus	PF06068(TIP49 C-terminus)
A0A3Q0IX82	A0A3Q0IX82|A0A3Q0IX82_DIACI	S	ALESINS(+79.97)R	7	8	Large ribosomal subunit protein eL30 OS=Diaphorina citri OX=121845 GN=LOC103508696 PE=3 SV=1	Large ribosomal subunit protein eL30	LOC103508696	31.39	968.433	-0.8	7	14	S7:Phosphorylation (STY):9.42	S13	ALESINSRLALVM	1868.58	151.083	889.306	1293.41	5224.63	1898.46	Quantified	GO:0006412(BP:translation);GO:0005840(CC:ribosome);GO:0003735(MF:structural constituent of ribosome)	K02866(NA)	ko03010(Ribosome)		PF00252(Ribosomal protein L16p/L10e);PF01248(Ribosomal protein L7Ae/L30e/S12e/Gadd45 family)
A0A3Q0IUB9	A0A3Q0IUB9|A0A3Q0IUB9_DIACI	S	ALFS(+79.97)SEGLISK	4	11	tRNA-dihydrouridine(20) synthase [NAD(P)+]-like OS=Diaphorina citri OX=121845 GN=LOC103507633 PE=4 SV=1	tRNA-dihydrouridine(20) synthase [NAD(P)+]-like	LOC103507633	48.08	1230.59	-2.4	193	203	S4:Phosphorylation (STY):0.00	S196	EKKALFSSEGLIS	1325.07	807.986	146.358	1481.88	1019.84	1749.83	Quantified	GO:0008152(BP:metabolic process)				PF00035(Double-stranded RNA binding motif)
A0A3Q0J269	A0A3Q0J269|A0A3Q0J269_DIACI:A0A3Q0J249|A0A3Q0J249_DIACI:A0A3Q0J238|A0A3Q0J238_DIACI:A0A1S4EGW1|A0A1S4EGW1_DIACI	S	ALGMSTNDLS(+79.97)PDSLQLINSYANANQPSPGVR	10	31	G-protein-signaling modulator 2 isoform X7 OS=Diaphorina citri OX=121845 GN=LOC103513613 PE=3 SV=1	G-protein-signaling modulator 2 isoform X7	LOC103513613	27.62	3309.53	-1.3	372	402	S10:Phosphorylation (STY):0.00	S381	MSTNDLSPDSLQL	143.423	156.045	202.515		238.267	182.293	Quantified	GO:0030695(MF:GTPase regulator activity);GO:0042802(MF:identical protein binding)				PF07721(Tetratricopeptide repeat);PF13424(Tetratricopeptide repeat);PF02188(GoLoco motif);PF13176(Tetratricopeptide repeat)
A0A3Q0J5S6	A0A3Q0J5S6|A0A3Q0J5S6_DIACI	T	ALIEEGHNPEEYVFETSTTTAIT(+79.97)PSK	23	26	SAFB-like transcription modulator OS=Diaphorina citri OX=121845 GN=LOC103515228 PE=4 SV=1	SAFB-like transcription modulator	LOC103515228	45.8	2943.34	-3	42	67	T23:Phosphorylation (STY):0.00	T64	STTTAITPSKKRG	169.749	260.439	318.318	133.596	63.8151	155.533	Quantified	GO:0003723(MF:RNA binding)				PF02037(SAP domain);PF00076(RNA recognition motif. (a.k.a. RRM, RBD, or RNP domain))
A0A3Q0IY18	A0A3Q0IY18|A0A3Q0IY18_DIACI	S	ALIS(+79.97)DDSIAR	4	10	V-type proton ATPase subunit a OS=Diaphorina citri OX=121845 GN=LOC103509452 PE=3 SV=1	V-type proton ATPase subunit a	LOC103509452	31.83	1139.52	-3.5	217	226	S4:Phosphorylation (STY):26.52	S220	MTRALISDDSIAR	519.572	145.747	90.5918	524.013	153.873	492.628	Quantified	GO:0016021(CC:integral component of membrane);GO:0033179(CC:proton-transporting V-type ATPase, V0 domain);GO:0015078(MF:proton transmembrane transporter activity)	K02154(NA)	ko00190(Oxidative phosphorylation);ko04142(Lysosome);ko04145(Phagosome)	Membrane;Multi-pass membrane protein	PF01496(V-type ATPase 116kDa subunit family)
A0A3Q0IY18	A0A3Q0IY18|A0A3Q0IY18_DIACI	S	ALISDDS(+79.97)IAR	7	10	V-type proton ATPase subunit a OS=Diaphorina citri OX=121845 GN=LOC103509452 PE=3 SV=1	V-type proton ATPase subunit a	LOC103509452	45.14	1139.52	-3.8	217	226	S7:Phosphorylation (STY):34.94	S223	ALISDDSIARQNN	626.632	755.141	569.734	981.896	843.611	1112.23	Quantified	GO:0016021(CC:integral component of membrane);GO:0033179(CC:proton-transporting V-type ATPase, V0 domain);GO:0015078(MF:proton transmembrane transporter activity)	K02154(NA)	ko00190(Oxidative phosphorylation);ko04142(Lysosome);ko04145(Phagosome)	Membrane;Multi-pass membrane protein	PF01496(V-type ATPase 116kDa subunit family)
A0A1S3DUM4	A0A1S3DUM4|A0A1S3DUM4_DIACI:A0A1S3DU10|A0A1S3DU10_DIACI	S	ALKGS(+79.97)TAILLDK	5	12	Uncharacterized protein LOC103524647 isoform X1 OS=Diaphorina citri OX=121845 GN=LOC103524647 PE=4 SV=1	Uncharacterized protein LOC103524647 isoform X1	LOC103524647	58.57	1308.71	-1.8	29	40	S5:Phosphorylation (STY):9.34	S33	VRALKGSTAILLD	2803.3	3436.82	2977.17	1288.05	3398.71	1699.9	Quantified					PF15929(Myofilin)
A0A3Q0JJI2	A0A3Q0JJI2|A0A3Q0JJI2_DIACI	S	ALM(+15.99)S(+79.97)NSSSTTSLSR	4	14	CLIP-associating protein 2-like OS=Diaphorina citri OX=121845 GN=LOC103519816 PE=4 SV=1	CLIP-associating protein 2-like	LOC103519816	25.31	1536.65	5.5	321	334	M3:Oxidation (M):1000.00;S4:Phosphorylation (STY):0.00	S324	YKRALMSNSSSTT	380.738	486.333	497.505	918.551	393.221	447.503	Quantified					PF12348(CLASP N terminal)
A0A3Q0JJI2	A0A3Q0JJI2|A0A3Q0JJI2_DIACI	S	ALMS(+79.97)NSSSTTSLSR	4	14	CLIP-associating protein 2-like OS=Diaphorina citri OX=121845 GN=LOC103519816 PE=4 SV=1	CLIP-associating protein 2-like	LOC103519816	46.07	1520.65	2.3	321	334	S4:Phosphorylation (STY):11.10	S324	YKRALMSNSSSTT	38.8452	333.844	546.319	531.145	139.087	284.358	Quantified					PF12348(CLASP N terminal)
A0A3Q0IL26	A0A3Q0IL26|A0A3Q0IL26_DIACI	S	ALNM(+15.99)PEQDPEPGIS(+79.97)EEER	14	18	Uncharacterized protein LOC108251969 isoform X1 OS=Diaphorina citri OX=121845 GN=LOC108251969 PE=4 SV=1	Uncharacterized protein LOC108251969 isoform X1	LOC108251969	51.84	2135.87	7.6	802	819		S815	DPEPGISEEERAF	1474.31	1866.94	588.997	1352.24	1276.21	3796.78	Quantified
A0A3Q0IL26	A0A3Q0IL26|A0A3Q0IL26_DIACI	S	ALNMPEQDPEPGIS(+79.97)EEER	14	18	Uncharacterized protein LOC108251969 isoform X1 OS=Diaphorina citri OX=121845 GN=LOC108251969 PE=4 SV=1	Uncharacterized protein LOC108251969 isoform X1	LOC108251969	65.75	2119.88	0.4	802	819		S815	DPEPGISEEERAF	23269.9	32122.2	22145.2	21449.4	21186.1	21487.5	Quantified
A0A1S3DGD1	A0A1S3DGD1|A0A1S3DGD1_DIACI	T	ALNQQYGENIDNLT(+79.97)LNIER	14	19	DNA ligase 1-like OS=Diaphorina citri OX=121845 GN=LOC103517824 PE=4 SV=1	DNA ligase 1-like	LOC103517824	26.25	2297.07	4.2	346	364	T14:Phosphorylation (STY):25.00	T359	ENIDNLTLNIERK	946.405	555.817	989.057		1803.55	497.102	Quantified	GO:0016874(MF:ligase activity)
A0A1S3CWF4	A0A1S3CWF4|A0A1S3CWF4_DIACI:A0A1S3CXS6|A0A1S3CXS6_DIACI	S	ALPIYQDEFDVLNLYS(+79.97)SK	16	18	Galactose mutarotase OS=Diaphorina citri OX=121845 GN=LOC103506600 PE=4 SV=2	Galactose mutarotase	LOC103506600	42.46	2194.02	-2.5	39	56	S16:Phosphorylation (STY):0.00	S54	DVLNLYSSKEPIK	153.146				264.82	155.966	Quantified	GO:0005975(BP:carbohydrate metabolic process);GO:0030246(MF:carbohydrate binding);GO:0016853(MF:isomerase activity)	K01785(NA)	ko00010(Glycolysis / Gluconeogenesis);ko00052(Galactose metabolism)		PF01263(Aldose 1-epimerase)
A0A1S4EE60	A0A1S4EE60|A0A1S4EE60_DIACI	S	ALQELVTAAGS(+79.97)EEEGENLGK	11	20	LOW QUALITY PROTEIN: ryanodine receptor-like OS=Diaphorina citri OX=121845 GN=LOC103511157 PE=4 SV=1	LOW QUALITY PROTEIN: ryanodine receptor-like	LOC103511157	61.74	2123.96	3.8	74	93	S11:Phosphorylation (STY):42.89	S84	LVTAAGSEEEGEN	1449.55	1597.58	2114.16	1066.12	1369.4	297.568	Quantified	GO:0005623(CC:cell);GO:0016020(CC:membrane);GO:0005219(MF:ryanodine-sensitive calcium-release channel activity)			Sarcoplasmic reticulum membrane;Multi-pass membrane protein	PF00622(SPRY domain);PF08709(Inositol 1,4,5-trisphosphate/ryanodine receptor);PF17171(Glutathione S-transferase, C-terminal domain);PF02026(RyR domain);PF02815(MIR domain);PF01365(RIH domain)
A0A3Q0IN50	A0A3Q0IN50|A0A3Q0IN50_DIACI	S	ALQNAES(+79.97)EVAALNR	7	14	Tropomyosin isoform X4 OS=Diaphorina citri OX=121845 GN=LOC103506877 PE=3 SV=1	Tropomyosin isoform X4	LOC103506877	66.9	1564.72	-0.9	77	90		S83	ALQNAESEVAALN	2250.24	2605.07	1686.5	2465.17	2131.55	2032.48	Quantified		K10373(NA)	ko04814(Motor proteins)		PF00261(Tropomyosin)
A0A1S3D4W4	A0A1S3D4W4|A0A1S3D4W4_DIACI	S	ALRPQS(+79.97)PGQSVR	6	12	Uncharacterized protein LOC103511395 OS=Diaphorina citri OX=121845 GN=LOC103511395 PE=4 SV=1	Uncharacterized protein LOC103511395	LOC103511395	45.7	1374.68	2.3	398	409	S6:Phosphorylation (STY):22.37	S403	RALRPQSPGQSVR	109.439	225.604	260.131	616.692	9449.2	230.72	Quantified
A0A3Q0J321	A0A3Q0J321|A0A3Q0J321_DIACI	S	ALS(+79.97)EGLVDLNKK	3	12	LOW QUALITY PROTEIN: microtubule-actin cross-linking factor 1, isoforms 1/2/3/5 OS=Diaphorina citri OX=121845 GN=LOC103512109 PE=4 SV=1	LOW QUALITY PROTEIN: microtubule-actin cross-linking factor 1, isoforms 1/2/3/5	LOC103512109	45.96	1365.69	-1.2	4477	4488		S4479	PFKKALSEGLVDL	186.429	225.594	224.71	223.596	86.7382	111.103	Quantified	GO:0045104(BP:intermediate filament cytoskeleton organization);GO:0005856(CC:cytoskeleton)				PF00307(Calponin homology (CH) domain);PF00435(Spectrin repeat)
A0A1S4ED50	A0A1S4ED50|A0A1S4ED50_DIACI	S	ALS(+79.97)PYFQLTQAVR	3	13	Probable 26S proteasome non-ATPase regulatory subunit 3 OS=Diaphorina citri OX=121845 GN=LOC103510319 PE=4 SV=1	Probable 26S proteasome non-ATPase regulatory subunit 3	LOC103510319	48.39	1572.77	-4.4	306	318	S3:Phosphorylation (STY):30.83	S308	VLRRALSPYFQLT	228.323	246.139	309.031	145.065	126.864	95.0466	Quantified	GO:0000502(CC:proteasome complex);GO:0030234(MF:enzyme regulator activity)	K03033(NA)	ko03050(Proteasome)		PF01399(PCI domain)
A0A3Q0IR07	A0A3Q0IR07|A0A3Q0IR07_DIACI:A0A3Q0IR16|A0A3Q0IR16_DIACI:A0A3Q0IR26|A0A3Q0IR26_DIACI	S	ALS(+79.97)RS(+79.97)SALEEDEDPIASQLNR	3	21	Uncharacterized protein LOC103508110 isoform X1 OS=Diaphorina citri OX=121845 GN=LOC103508110 PE=4 SV=1	Uncharacterized protein LOC103508110 isoform X1	LOC103508110	75.7	2460.06	5.3	207	227	S3:Phosphorylation (STY):0.00;S5:Phosphorylation (STY):0.00	S209	LVEKALSRSSALE	24752.3	38377.2	13073.8	14594.3	24761.7	16426.6	Quantified
A0A3Q0IR07	A0A3Q0IR07|A0A3Q0IR07_DIACI:A0A3Q0IR16|A0A3Q0IR16_DIACI:A0A3Q0IR26|A0A3Q0IR26_DIACI	S	ALS(+79.97)RS(+79.97)SALEEDEDPIASQLNR	5	21	Uncharacterized protein LOC103508110 isoform X1 OS=Diaphorina citri OX=121845 GN=LOC103508110 PE=4 SV=1	Uncharacterized protein LOC103508110 isoform X1	LOC103508110	75.7	2460.06	5.3	207	227	S3:Phosphorylation (STY):0.00;S5:Phosphorylation (STY):0.00	S211	EKALSRSSALEED	24752.3	38377.2	13073.8	14594.3	24761.7	16426.6	Quantified
A0A3Q0IR07	A0A3Q0IR07|A0A3Q0IR07_DIACI:A0A3Q0IR16|A0A3Q0IR16_DIACI:A0A3Q0IR26|A0A3Q0IR26_DIACI	S	ALS(+79.97)RSS(+79.97)ALEEDEDPIASQLNR	3	21	Uncharacterized protein LOC103508110 isoform X1 OS=Diaphorina citri OX=121845 GN=LOC103508110 PE=4 SV=1	Uncharacterized protein LOC103508110 isoform X1	LOC103508110	74.11	2460.06	-0.4	207	227	S3:Phosphorylation (STY):9.40;S6:Phosphorylation (STY):12.28	S209	LVEKALSRSSALE	11128.9	38800.6	14518.1	14830	25932.6	16891.8	Quantified
A0A3Q0IR07	A0A3Q0IR07|A0A3Q0IR07_DIACI:A0A3Q0IR16|A0A3Q0IR16_DIACI:A0A3Q0IR26|A0A3Q0IR26_DIACI	S	ALS(+79.97)RSS(+79.97)ALEEDEDPIASQLNR	6	21	Uncharacterized protein LOC103508110 isoform X1 OS=Diaphorina citri OX=121845 GN=LOC103508110 PE=4 SV=1	Uncharacterized protein LOC103508110 isoform X1	LOC103508110	74.11	2460.06	-0.4	207	227	S3:Phosphorylation (STY):9.40;S6:Phosphorylation (STY):12.28	S212	KALSRSSALEEDE	11128.9	38800.6	14518.1	14830	25932.6	16891.8	Quantified
A0A3Q0JK09	A0A3Q0JK09|A0A3Q0JK09_DIACI	S	ALS(+79.97)SPLVALSPESPSGPLLTPR	3	22	Histone deacetylase 4-like OS=Diaphorina citri OX=121845 GN=LOC103523301 PE=3 SV=1	Histone deacetylase 4-like	LOC103523301	61.46	2268.18	2.2	369	390	S3:Phosphorylation (STY):0.00	S371	PLSRALSSPLVAL	1348.13	2079.78	856.084	279.075	410.608	775.97	Quantified	GO:0016787(MF:hydrolase activity)	K11406(NA)	ko04371(Apelin signaling pathway)		PF00850(Histone deacetylase domain)
A0A3Q0ILW3	A0A3Q0ILW3|A0A3Q0ILW3_DIACI:A0A1S3D0N5|A0A1S3D0N5_DIACI:A0A1S3D6W1|A0A1S3D6W1_DIACI	Y	ALSNLESIPGGYSALQRMY(+79.97)R	19	20	Ubiquilin-1 OS=Diaphorina citri OX=121845 GN=LOC103506324 PE=4 SV=1	Ubiquilin-1	LOC103506324	24.4	2305.09	5.1	203	222	Y19:Phosphorylation (STY):10.92	Y221	SALQRMYRDIQEP		54.667	63.658	7868.92	7269.77	8801.66	Quantified					PF00240(Ubiquitin family);PF00627(UBA/TS-N domain)
A0A3Q0J159	A0A3Q0J159|A0A3Q0J159_DIACI	S	ALSPIS(+79.97)DEDLPISVSLSK	6	18	Histone-lysine N-methyltransferase SETD1 OS=Diaphorina citri OX=121845 GN=LOC103513463 PE=4 SV=1	Histone-lysine N-methyltransferase SETD1	LOC103513463	42	1949.96	7	1091	1108	S6:Phosphorylation (STY):12.33	S1096	KALSPISDEDLPI	192.009	493.353	689.815	227.903	917.191	417.756	Quantified	GO:0032259(BP:methylation);GO:0008168(MF:methyltransferase activity);GO:0003723(MF:RNA binding)				PF11764(COMPASS (Complex proteins associated with Set1p) component N);PF00076(RNA recognition motif. (a.k.a. RRM, RBD, or RNP domain))
A0A3Q0II33	A0A3Q0II33|A0A3Q0II33_DIACI	S	ALSTC(+57.02)SS(+79.97)LNR	7	10	Dentin sialophosphoprotein-like OS=Diaphorina citri OX=121845 GN=LOC113465496 PE=4 SV=1	Dentin sialophosphoprotein-like	LOC113465496	28.44	1187.5	-0.7	184	193	C5:Carbamidomethylation:1000.00;S7:Phosphorylation (STY):7.65	S190	ALSTCSSLNRSGD	125.793	57.4499	489.064	267.486	1009.7	1137.49	Quantified
A0A3Q0J321	A0A3Q0J321|A0A3Q0J321_DIACI	T	ALT(+79.97)PEVESLQSTFR	3	14	LOW QUALITY PROTEIN: microtubule-actin cross-linking factor 1, isoforms 1/2/3/5 OS=Diaphorina citri OX=121845 GN=LOC103512109 PE=4 SV=1	LOW QUALITY PROTEIN: microtubule-actin cross-linking factor 1, isoforms 1/2/3/5	LOC103512109	62.77	1656.78	9.2	1255	1268	T3:Phosphorylation (STY):56.99	T1257	STLKALTPEVESL	2191.87	958.338	1953.82	2848.21	3453.75	833.315	Quantified	GO:0045104(BP:intermediate filament cytoskeleton organization);GO:0005856(CC:cytoskeleton)				PF00307(Calponin homology (CH) domain);PF00435(Spectrin repeat)
A0A3Q0J6G9	A0A3Q0J6G9|A0A3Q0J6G9_DIACI	T	ALT(+79.97)PVGDNK	3	9	tRNA (Adenine(37)-N6)-methyltransferase-like OS=Diaphorina citri OX=121845 GN=LOC103515651 PE=3 SV=1	tRNA (Adenine(37)-N6)-methyltransferase-like	LOC103515651	48.36	993.453	4.8	65	73		T67	QDDKALTPVGDNK	453.806		421.3	171.49	295.859	415.45	Quantified	GO:0032259(BP:methylation);GO:0008168(MF:methyltransferase activity)				PF01980(Uncharacterised protein family UPF0066)
A0A3Q0JGR8	A0A3Q0JGR8|A0A3Q0JGR8_DIACI:A0A3Q0JGL4|A0A3Q0JGL4_DIACI	S	ALVETLS(+79.97)GDKK	7	11	Fatty acid synthase-like OS=Diaphorina citri OX=121845 GN=LOC103520811 PE=4 SV=1	Fatty acid synthase-like	LOC103520811	48.01	1239.61	-0.5	83	93	S7:Phosphorylation (STY):18.53	S89	ALVETLSGDKKTV	964.335	757.586	878.835	1132.47	1583.61	1785.92	Quantified	GO:0008152(BP:metabolic process);GO:0016491(MF:oxidoreductase activity);GO:0016297(MF:acyl-[acyl-carrier-protein] hydrolase activity)
A0A1S4EHQ7	A0A1S4EHQ7|A0A1S4EHQ7_DIACI	S	AM(+15.99)DEAIAS(+79.97)VDER	8	12	Uncharacterized protein LOC103514484 OS=Diaphorina citri OX=121845 GN=LOC103514484 PE=4 SV=1	Uncharacterized protein LOC103514484	LOC103514484	55.62	1401.55	1.2	134	145		S141	MDEAIASVDEREK	1159.54	234.603	247.899	145.813	920.2	1551.14	Quantified
A0A3Q0J6P0	A0A3Q0J6P0|A0A3Q0J6P0_DIACI	S	AM(+15.99)S(+79.97)LELTDGIPR	3	12	Uncharacterized protein LOC108253231 OS=Diaphorina citri OX=121845 GN=LOC108253231 PE=4 SV=1	Uncharacterized protein LOC108253231	LOC108253231	43.58	1397.63	-7.7	398	409	M2:Oxidation (M):1000.00;S3:Phosphorylation (STY):33.81	S400	VLERAMSLELTDG	105.388	121.989	88.1151	87.1778	33.8017	79.9764	Quantified
A0A1S4EHQ7	A0A1S4EHQ7|A0A1S4EHQ7_DIACI	S	AMDEAIAS(+79.97)VDER	8	12	Uncharacterized protein LOC103514484 OS=Diaphorina citri OX=121845 GN=LOC103514484 PE=4 SV=1	Uncharacterized protein LOC103514484	LOC103514484	55.3	1385.55	0.9	134	145		S141	MDEAIASVDEREK	2708.34	2158.84	1590.69	1443.59	2426.37	3236.51	Quantified
A0A3Q0J8Q6	A0A3Q0J8Q6|A0A3Q0J8Q6_DIACI	S	AMIIQQS(+79.97)PK	7	9	Endochitinase A-like OS=Diaphorina citri OX=121845 GN=LOC113469525 PE=4 SV=1	Endochitinase A-like	LOC113469525	35.45	1094.52	0.7	73	81		S79	AMIIQQSPKIMSS	489.277	377.833	298.302	738.845	400.27	534.075	Quantified
A0A3Q0JLH8	A0A3Q0JLH8|A0A3Q0JLH8_DIACI	S	AMS(+79.97)IDTDVDDLDEK	3	14	Uncharacterized protein LOC103521577 OS=Diaphorina citri OX=121845 GN=LOC103521577 PE=4 SV=1	Uncharacterized protein LOC103521577	LOC103521577	40.8	1645.64	2.8	47	60	S3:Phosphorylation (STY):56.34	S49	LSLRAMSIDTDVD	268.733	261.192	39.6681	83.6282	233.348	313.296	Quantified
A0A1S3CZL2	A0A1S3CZL2|A0A1S3CZL2_DIACI	S	AMS(+79.97)IGELTQELFDAK	3	15	Tubulin beta chain OS=Diaphorina citri OX=121845 GN=LOC103508326 PE=3 SV=1	Tubulin beta chain	LOC103508326	58.43	1731.78	8.2	282	296	S3:Phosphorylation (STY):56.94	S284	IDYKAMSIGELTQ		123.748	207.838		242.533	49.9166	Quantified	GO:0007017(BP:microtubule-based process);GO:0005737(CC:cytoplasm);GO:0005874(CC:microtubule);GO:0005525(MF:GTP binding);GO:0003924(MF:GTPase activity);GO:0005200(MF:structural constituent of cytoskeleton)	K07375(NA)	ko04145(Phagosome);ko04540(Gap junction);ko04814(Motor proteins)	Cytoplasm;cytoskeleton	PF03953(Tubulin C-terminal domain);PF00091(Tubulin/FtsZ family, GTPase domain)
A0A3Q0J6P0	A0A3Q0J6P0|A0A3Q0J6P0_DIACI	S	AMS(+79.97)LELTDGIPR	3	12	Uncharacterized protein LOC108253231 OS=Diaphorina citri OX=121845 GN=LOC108253231 PE=4 SV=1	Uncharacterized protein LOC108253231	LOC108253231	57.81	1381.63	-5.5	398	409	S3:Phosphorylation (STY):67.69	S400	VLERAMSLELTDG	801.432	492.447	640.527	574.961	126.968	217.317	Quantified
A0A3Q0ILM8	A0A3Q0ILM8|A0A3Q0ILM8_DIACI	T	AMST(+79.97)PVGSLQTGHETILSPSR	4	21	Casein kinase I OS=Diaphorina citri OX=121845 GN=LOC103506322 PE=4 SV=1	Casein kinase I	LOC103506322	30.47	2248.06	-1	303	323	T4:Phosphorylation (STY):0.00	T306	TGRAMSTPVGSLQ	112.36	62.7615	183.834		137.284	95.1159	Quantified	GO:0004674(MF:protein serine/threonine kinase activity)	K08958(NA)	ko04340(Hedgehog signaling pathway);ko04341(Hedgehog signaling pathway - fly)		PF12605(Casein kinase 1 gamma C terminal)
A0A1S3D331	A0A1S3D331|A0A1S3D331_DIACI	S	AMVC(+57.02)HLIS(+79.97)SKES(+79.97)FK	8	14	Uncharacterized protein LOC103509555 OS=Diaphorina citri OX=121845 GN=LOC103509555 PE=4 SV=1	Uncharacterized protein LOC103509555	LOC103509555	30.19	1795.74	-1.5	352	365	C4:Carbamidomethylation:1000.00;S8:Phosphorylation (STY):0.00;S12:Phosphorylation (STY):0.00	S359	MVCHLISSKESFK	155.739	159.936	617.629		153.287	195.169	Quantified
A0A1S3D331	A0A1S3D331|A0A1S3D331_DIACI	S	AMVC(+57.02)HLIS(+79.97)SKES(+79.97)FK	12	14	Uncharacterized protein LOC103509555 OS=Diaphorina citri OX=121845 GN=LOC103509555 PE=4 SV=1	Uncharacterized protein LOC103509555	LOC103509555	30.19	1795.74	-1.5	352	365	C4:Carbamidomethylation:1000.00;S8:Phosphorylation (STY):0.00;S12:Phosphorylation (STY):0.00	S363	LISSKESFKSTVD	155.739	159.936	617.629		153.287	195.169	Quantified
A0A1S3D331	A0A1S3D331|A0A1S3D331_DIACI	S	AMVC(+57.02)HLISS(+79.97)KES(+79.97)FK	9	14	Uncharacterized protein LOC103509555 OS=Diaphorina citri OX=121845 GN=LOC103509555 PE=4 SV=1	Uncharacterized protein LOC103509555	LOC103509555	35.79	1795.74	-0.6	352	365	C4:Carbamidomethylation:1000.00;S9:Phosphorylation (STY):10.11;S12:Phosphorylation (STY):33.81	S360	VCHLISSKESFKS	155.739	1131.88	617.629		394.63	380.865	Quantified
A0A1S3D331	A0A1S3D331|A0A1S3D331_DIACI	S	AMVC(+57.02)HLISS(+79.97)KES(+79.97)FK	12	14	Uncharacterized protein LOC103509555 OS=Diaphorina citri OX=121845 GN=LOC103509555 PE=4 SV=1	Uncharacterized protein LOC103509555	LOC103509555	35.79	1795.74	-0.6	352	365	C4:Carbamidomethylation:1000.00;S9:Phosphorylation (STY):10.11;S12:Phosphorylation (STY):33.81	S363	LISSKESFKSTVD	155.739	1131.88	617.629		394.63	380.865	Quantified
A0A1S3D331	A0A1S3D331|A0A1S3D331_DIACI	S	AMVC(+57.02)HLISSKES(+79.97)FK	12	14	Uncharacterized protein LOC103509555 OS=Diaphorina citri OX=121845 GN=LOC103509555 PE=4 SV=1	Uncharacterized protein LOC103509555	LOC103509555	36.02	1715.78	2.3	352	365	C4:Carbamidomethylation:1000.00;S12:Phosphorylation (STY):9.42	S363	LISSKESFKSTVD	69.9055	232.189	153.76	86.1102	106.771	66.3623	Quantified
A0A3Q0IN52	A0A3Q0IN52|A0A3Q0IN52_DIACI:A0A3Q0JNU2|A0A3Q0JNU2_DIACI	S	ANES(+79.97)TELEK	4	9	LOW QUALITY PROTEIN: titin OS=Diaphorina citri OX=121845 GN=LOC103524768 PE=4 SV=1	LOW QUALITY PROTEIN: titin	LOC103524768	38.82	1099.44	-2.1	3737	3745	S4:Phosphorylation (STY):0.00	S3740	KERANESTELEKV	93.3143		778.508	978.501	1419.57		Quantified					PF07679(Immunoglobulin I-set domain);PF06582(Repeat of unknown function (DUF1136))
A0A1S3DM96	A0A1S3DM96|A0A1S3DM96_DIACI	T	ANGT(+79.97)AGSVPSPHTS(+79.97)PLNSPR	4	20	Cytoplasmic polyadenylation element-binding protein 1-like OS=Diaphorina citri OX=121845 GN=LOC103521362 PE=4 SV=1	Cytoplasmic polyadenylation element-binding protein 1-like	LOC103521362	26.01	2105.89	8.7	197	216	T4:Phosphorylation (STY):0.00;S14:Phosphorylation (STY):4.59	T200	NVRANGTAGSVPS	173.549	567.281	479.879	470.922	212.656	79.8376	Quantified	GO:0003730(MF:mRNA 3'-UTR binding);GO:0045182(MF:translation regulator activity)				PF16367(RNA recognition motif)
A0A1S3DM96	A0A1S3DM96|A0A1S3DM96_DIACI	S	ANGT(+79.97)AGSVPSPHTS(+79.97)PLNSPR	14	20	Cytoplasmic polyadenylation element-binding protein 1-like OS=Diaphorina citri OX=121845 GN=LOC103521362 PE=4 SV=1	Cytoplasmic polyadenylation element-binding protein 1-like	LOC103521362	26.01	2105.89	8.7	197	216	T4:Phosphorylation (STY):0.00;S14:Phosphorylation (STY):4.59	S210	VPSPHTSPLNSPR	173.549	567.281	479.879	470.922	212.656	79.8376	Quantified	GO:0003730(MF:mRNA 3'-UTR binding);GO:0045182(MF:translation regulator activity)				PF16367(RNA recognition motif)
A0A1S4EC99	A0A1S4EC99|A0A1S4EC99_DIACI	S	ANLLPSES(+79.97)TPKPEATESQAGSDNEGNLVIDEGSEK	8	35	Hepatoma-derived growth factor-related protein 2 OS=Diaphorina citri OX=121845 GN=LOC103509541 PE=3 SV=1	Hepatoma-derived growth factor-related protein 2	LOC103509541	47.01	3692.66	2.7	96	130	S8:Phosphorylation (STY):0.00	S103	NLLPSESTPKPEA	74663	87690.7	83978.6	92918	405.855	47823.8	Quantified				Nucleus	PF00855(PWWP domain);PF11467(Lens epithelium-derived growth factor (LEDGF))
A0A1S4EC99	A0A1S4EC99|A0A1S4EC99_DIACI	T	ANLLPSESTPKPEAT(+79.97)ESQAGSDNEGNLVIDEGSEK	15	35	Hepatoma-derived growth factor-related protein 2 OS=Diaphorina citri OX=121845 GN=LOC103509541 PE=3 SV=1	Hepatoma-derived growth factor-related protein 2	LOC103509541	73.52	3692.66	2.1	96	130	T15:Phosphorylation (STY):0.00	T110	TPKPEATESQAGS	62710.9	73525.8	60510.8	68365	48565.5	52887.3	Quantified				Nucleus	PF00855(PWWP domain);PF11467(Lens epithelium-derived growth factor (LEDGF))
A0A1S4EC99	A0A1S4EC99|A0A1S4EC99_DIACI	S	ANLLPSESTPKPEATESQAGS(+79.97)DNEGNLVIDEGSEK	21	35	Hepatoma-derived growth factor-related protein 2 OS=Diaphorina citri OX=121845 GN=LOC103509541 PE=3 SV=1	Hepatoma-derived growth factor-related protein 2	LOC103509541	77.77	3692.66	2	96	130	S21:Phosphorylation (STY):9.45	S116	TESQAGSDNEGNL	62710.9	73525.8	60510.8	68365	48565.5	47823.8	Quantified				Nucleus	PF00855(PWWP domain);PF11467(Lens epithelium-derived growth factor (LEDGF))
A0A1S3D675	A0A1S3D675|A0A1S3D675_DIACI	T	ANLT(+79.97)HSSPPASLAQNQTFK	4	19	Uncharacterized protein LOC103512282 OS=Diaphorina citri OX=121845 GN=LOC103512282 PE=4 SV=2	Uncharacterized protein LOC103512282	LOC103512282	53.07	2090.98	-4.8	122	140	T4:Phosphorylation (STY):0.00	T125	ESKANLTHSSPPA	420.02		747.285	976.766	1893.11	2119.47	Quantified	GO:0008408(MF:3'-5' exonuclease activity);GO:0003676(MF:nucleic acid binding)				PF01612(3'-5' exonuclease)
A0A3Q0IUR1	A0A3Q0IUR1|A0A3Q0IUR1_DIACI	S	ANLTDATTEVEES(+79.97)SDHGQK	13	19	RAB11-binding protein RELCH-like OS=Diaphorina citri OX=121845 GN=LOC103510038 PE=4 SV=1	RAB11-binding protein RELCH-like	LOC103510038	33.34	2110.87	4.7	123	141	S13:Phosphorylation (STY):14.02	S135	TTEVEESSDHGQK	3774.24	4871.51	4560.5	5441.32	3388.41	3645.33	Quantified	GO:0032367(BP:intracellular cholesterol transport);GO:0005802(CC:trans-Golgi network)
A0A3Q0IUR1	A0A3Q0IUR1|A0A3Q0IUR1_DIACI	S	ANLTDATTEVEESS(+79.97)DHGQK	14	19	RAB11-binding protein RELCH-like OS=Diaphorina citri OX=121845 GN=LOC103510038 PE=4 SV=1	RAB11-binding protein RELCH-like	LOC103510038	29.88	2110.87	-5.6	123	141	S14:Phosphorylation (STY):0.00	S136	TEVEESSDHGQKS	199.829		125.118	279.086	149.045	548.937	Quantified	GO:0032367(BP:intracellular cholesterol transport);GO:0005802(CC:trans-Golgi network)
A0A1S3D675	A0A1S3D675|A0A1S3D675_DIACI	S	ANLTHS(+79.97)SPPASLAQNQTFK	6	19	Uncharacterized protein LOC103512282 OS=Diaphorina citri OX=121845 GN=LOC103512282 PE=4 SV=2	Uncharacterized protein LOC103512282	LOC103512282	54.39	2090.98	-4.2	122	140	S6:Phosphorylation (STY):0.00	S127	KANLTHSSPPASL	420.02		1809.65	976.766	4429.9	2119.47	Quantified	GO:0008408(MF:3'-5' exonuclease activity);GO:0003676(MF:nucleic acid binding)				PF01612(3'-5' exonuclease)
A0A1S3D675	A0A1S3D675|A0A1S3D675_DIACI	S	ANLTHSS(+79.97)PPASLAQNQTFK	7	19	Uncharacterized protein LOC103512282 OS=Diaphorina citri OX=121845 GN=LOC103512282 PE=4 SV=2	Uncharacterized protein LOC103512282	LOC103512282	53.6	2090.98	-2.8	122	140	S7:Phosphorylation (STY):6.63	S128	ANLTHSSPPASLA	1711.03		1390.69	2596.28	1893.11	2676.19	Quantified	GO:0008408(MF:3'-5' exonuclease activity);GO:0003676(MF:nucleic acid binding)				PF01612(3'-5' exonuclease)
A0A3Q0J4N2	A0A3Q0J4N2|A0A3Q0J4N2_DIACI:A0A3Q0J924|A0A3Q0J924_DIACI	S	ANNDFDEIS(+79.97)GKPDLR	9	15	Uncharacterized protein LOC103514828 isoform X5 OS=Diaphorina citri OX=121845 GN=LOC103514828 PE=3 SV=1	Uncharacterized protein LOC103514828 isoform X5	LOC103514828	70.21	1769.76	0.8	143	157		S151	NDFDEISGKPDLR	65270.5	88833.3	63231.2	77395.3	52107.4	58831.6	Quantified					PF01722(BolA-like protein)
A0A1S3DCY2	A0A1S3DCY2|A0A1S3DCY2_DIACI:A0A1S3DMN2|A0A1S3DMN2_DIACI	T	ANNQIDT(+79.97)NQSPLEENK	7	16	GATA zinc finger domain-containing protein 14-like OS=Diaphorina citri OX=121845 GN=LOC103516070 PE=4 SV=1	GATA zinc finger domain-containing protein 14-like	LOC103516070	43.08	1893.81	1.3	356	371	T7:Phosphorylation (STY):12.33	T362	ANNQIDTNQSPLE	720.228	917.83	839.761	1093.08	230.585	232.074	Quantified
A0A1S3DMN2	A0A1S3DMN2|A0A1S3DMN2_DIACI	S	ANNQIDTNQS(+79.97)PLEENK	10	16	GATA zinc finger domain-containing protein 14-like OS=Diaphorina citri OX=121845 GN=LOC103521252 PE=4 SV=1	GATA zinc finger domain-containing protein 14-like	LOC103521252	38.23	1893.81	3.5	356	371	S10:Phosphorylation (STY):4.52	S365	QIDTNQSPLEENK	156.69	299.372	269.581	321.431	230.585	97.6861	Quantified
A0A1S3DBI6	A0A1S3DBI6|A0A1S3DBI6_DIACI:A0A1S3DBA0|A0A1S3DBA0_DIACI:A0A1S3DBH7|A0A1S3DBH7_DIACI	S	ANS(+79.97)AGEEEES(+79.97)LSR	3	13	Formin-binding protein 1-like isoform X1 OS=Diaphorina citri OX=121845 GN=LOC103515191 PE=4 SV=1	Formin-binding protein 1-like isoform X1	LOC103515191	35.25	1537.53	15.8	492	504	S3:Phosphorylation (STY):32.47;S10:Phosphorylation (STY):8.22	S494	RDERANSAGEEEE	1208.5	1964.81	2888.04	4993.81	10478	6558.46	Quantified					PF00611(Fes/CIP4, and EFC/F-BAR homology domain);PF00018(SH3 domain)
A0A1S3DBI6	A0A1S3DBI6|A0A1S3DBI6_DIACI:A0A1S3DBA0|A0A1S3DBA0_DIACI:A0A1S3DBH7|A0A1S3DBH7_DIACI	S	ANS(+79.97)AGEEEES(+79.97)LSR	10	13	Formin-binding protein 1-like isoform X1 OS=Diaphorina citri OX=121845 GN=LOC103515191 PE=4 SV=1	Formin-binding protein 1-like isoform X1	LOC103515191	35.25	1537.53	15.8	492	504	S3:Phosphorylation (STY):32.47;S10:Phosphorylation (STY):8.22	S501	AGEEEESLSRSAS	1208.5	1964.81	2888.04	4993.81	10478	6558.46	Quantified					PF00611(Fes/CIP4, and EFC/F-BAR homology domain);PF00018(SH3 domain)
A0A1S3DBI6	A0A1S3DBI6|A0A1S3DBI6_DIACI:A0A1S3DBA0|A0A1S3DBA0_DIACI:A0A1S3DBH7|A0A1S3DBH7_DIACI	S	ANS(+79.97)AGEEEESLSR	3	13	Formin-binding protein 1-like isoform X1 OS=Diaphorina citri OX=121845 GN=LOC103515191 PE=4 SV=1	Formin-binding protein 1-like isoform X1	LOC103515191	73.64	1457.57	-0.8	492	504	S3:Phosphorylation (STY):142.27	S494	RDERANSAGEEEE	11816.8	12243.6	10241.2	13011.7	8976.43	8426.92	Quantified					PF00611(Fes/CIP4, and EFC/F-BAR homology domain);PF00018(SH3 domain)
A0A1S3CWW1	A0A1S3CWW1|A0A1S3CWW1_DIACI	S	ANS(+79.97)LENLLAAEK	3	12	Rho GTPase-activating protein gacZ OS=Diaphorina citri OX=121845 GN=LOC103506755 PE=4 SV=1	Rho GTPase-activating protein gacZ	LOC103506755	64.83	1351.64	-2.4	102	113		S104	NLRRANSLENLLA	4613.92	2070.43	1408.17	2760.69	1397.73	1485.16	Quantified	GO:0023041(BP:neuronal signal transduction);GO:0030867(CC:rough endoplasmic reticulum membrane)			Endoplasmic reticulum membrane;Multi-pass membrane protein;Membrane;Nucleus membrane;Rough endoplasmic reticulum membrane
A0A3Q0JHL5	A0A3Q0JHL5|A0A3Q0JHL5_DIACI:A0A1S4ET97|A0A1S4ET97_DIACI:A0A3Q0JM21|A0A3Q0JM21_DIACI:A0A3Q0JL79|A0A3Q0JL79_DIACI	S	ANS(+79.97)PPQMDDLYETSR	3	15	Uncharacterized protein LOC103521385 OS=Diaphorina citri OX=121845 GN=LOC103521385 PE=4 SV=1	Uncharacterized protein LOC103521385	LOC103521385	46.57	1802.72	1.8	836	850	S3:Phosphorylation (STY):49.35	S838	LKSRANSPPQMDD	3043.51	113.424	4694.29	1284.69	1783.97	2314.95	Quantified	GO:0007601(BP:visual perception);GO:0016021(CC:integral component of membrane);GO:0004930(MF:G protein-coupled receptor activity);GO:0005118(MF:sevenless binding)			Membrane;Multi-pass membrane protein	PF00003(7 transmembrane sweet-taste receptor of 3 GCPR)
A0A3Q0J9M3	A0A3Q0J9M3|A0A3Q0J9M3_DIACI:A0A1S3DE13|A0A1S3DE13_DIACI	S	ANS(+79.97)VQVPSTPASPFAK	3	16	Smoothelin-like protein 1 OS=Diaphorina citri OX=121845 GN=LOC108253423 PE=4 SV=1	Smoothelin-like protein 1	LOC108253423	64.26	1679.79	2.5	120	135	S3:Phosphorylation (STY):77.53	S122	RLTKANSVQVPST	7044.13	10944.6	11324.5	4934.71	4590.72	4904.59	Quantified	GO:0015074(BP:DNA integration);GO:0003676(MF:nucleic acid binding)				PF00307(Calponin homology (CH) domain)
A0A1S3DBI6	A0A1S3DBI6|A0A1S3DBI6_DIACI:A0A1S3DBA0|A0A1S3DBA0_DIACI:A0A1S3DBH7|A0A1S3DBH7_DIACI	S	ANSAGEEEES(+79.97)LS(+79.97)R	10	13	Formin-binding protein 1-like isoform X1 OS=Diaphorina citri OX=121845 GN=LOC103515191 PE=4 SV=1	Formin-binding protein 1-like isoform X1	LOC103515191	55.85	1537.53	-1.9	492	504	S10:Phosphorylation (STY):90.79;S12:Phosphorylation (STY):103.69	S501	AGEEEESLSRSAS	6488.31	3345.44	3525.54	10025.4	7010.98	6118.86	Quantified					PF00611(Fes/CIP4, and EFC/F-BAR homology domain);PF00018(SH3 domain)
A0A1S3DBI6	A0A1S3DBI6|A0A1S3DBI6_DIACI:A0A1S3DBA0|A0A1S3DBA0_DIACI:A0A1S3DBH7|A0A1S3DBH7_DIACI	S	ANSAGEEEES(+79.97)LS(+79.97)R	12	13	Formin-binding protein 1-like isoform X1 OS=Diaphorina citri OX=121845 GN=LOC103515191 PE=4 SV=1	Formin-binding protein 1-like isoform X1	LOC103515191	55.85	1537.53	-1.9	492	504	S10:Phosphorylation (STY):90.79;S12:Phosphorylation (STY):103.69	S503	EEEESLSRSASDS	6488.31	3345.44	3525.54	10025.4	7010.98	6118.86	Quantified					PF00611(Fes/CIP4, and EFC/F-BAR homology domain);PF00018(SH3 domain)
A0A1S3DBI6	A0A1S3DBI6|A0A1S3DBI6_DIACI:A0A1S3DBA0|A0A1S3DBA0_DIACI:A0A1S3DBH7|A0A1S3DBH7_DIACI	S	ANSAGEEEES(+79.97)LSR	10	13	Formin-binding protein 1-like isoform X1 OS=Diaphorina citri OX=121845 GN=LOC103515191 PE=4 SV=1	Formin-binding protein 1-like isoform X1	LOC103515191	47.43	1457.57	-0.3	492	504	S10:Phosphorylation (STY):0.00	S501	AGEEEESLSRSAS		2531.63					Identified					PF00611(Fes/CIP4, and EFC/F-BAR homology domain);PF00018(SH3 domain)
A0A1S3DBI6	A0A1S3DBI6|A0A1S3DBI6_DIACI:A0A1S3DBA0|A0A1S3DBA0_DIACI:A0A1S3DBH7|A0A1S3DBH7_DIACI:A0A1S3D8H4|A0A1S3D8H4_DIACI	S	ANSAGEEEESLS(+79.97)R	12	13	Formin-binding protein 1-like isoform X1 OS=Diaphorina citri OX=121845 GN=LOC103515191 PE=4 SV=1	Formin-binding protein 1-like isoform X1	LOC103515191	60.96	1457.57	-0.5	492	504	S12:Phosphorylation (STY):17.01	S503	EEEESLSRSASDS	2622.22	340.095	3774.55	2381.77	189.772	5015.67	Quantified					PF00611(Fes/CIP4, and EFC/F-BAR homology domain);PF00018(SH3 domain)
A0A1S3DBG8	A0A1S3DBG8|A0A1S3DBG8_DIACI	S	ANSGASAAS(+79.97)PTGSAAC(+57.02)VKM(+15.99)EHSAPS(+79.97)VFIG	9	29	Uncharacterized protein LOC103515404 OS=Diaphorina citri OX=121845 GN=LOC103515404 PE=4 SV=1	Uncharacterized protein LOC103515404	LOC103515404	27.79	2937.21	-10.4	704	732	S9:Phosphorylation (STY):0.00;C16:Carbamidomethylation:1000.00;M19:Oxidation (M):1000.00;S25:Phosphorylation (STY):14.84	S712	SGASAASPTGSAA	307.242	343.496	2247.34	800.39	921.516	398.2	Quantified	GO:0007275(BP:multicellular organism development);GO:0006355(BP:regulation of transcription, DNA-templated);GO:0005634(CC:nucleus);GO:0003677(MF:DNA binding)				PF00292('Paired box' domain)
A0A1S3DBG8	A0A1S3DBG8|A0A1S3DBG8_DIACI	S	ANSGASAAS(+79.97)PTGSAAC(+57.02)VKM(+15.99)EHSAPS(+79.97)VFIG	25	29	Uncharacterized protein LOC103515404 OS=Diaphorina citri OX=121845 GN=LOC103515404 PE=4 SV=1	Uncharacterized protein LOC103515404	LOC103515404	27.79	2937.21	-10.4	704	732	S9:Phosphorylation (STY):0.00;C16:Carbamidomethylation:1000.00;M19:Oxidation (M):1000.00;S25:Phosphorylation (STY):14.84	S728	MEHSAPSVFIG__	307.242	343.496	2247.34	800.39	921.516	398.2	Quantified	GO:0007275(BP:multicellular organism development);GO:0006355(BP:regulation of transcription, DNA-templated);GO:0005634(CC:nucleus);GO:0003677(MF:DNA binding)				PF00292('Paired box' domain)
A0A3Q0JKV5	A0A3Q0JKV5|A0A3Q0JKV5_DIACI	S	ANSGDSEDS(+79.97)KSDGIPAPVPDPAPVTVTPVEDTPASEQAR	9	39	Uncharacterized protein LOC113473650 OS=Diaphorina citri OX=121845 GN=LOC113473650 PE=4 SV=1	Uncharacterized protein LOC113473650	LOC113473650	50.68	3982.8	0.7	8	46	S9:Phosphorylation (STY):0.00	S16	SGDSEDSKSDGIP	12202.1	18887	20415.3	25514.6	15680.1	19388.2	Quantified	GO:0007010(BP:cytoskeleton organization);GO:0044763(NA:NA)
A0A3Q0JKV5	A0A3Q0JKV5|A0A3Q0JKV5_DIACI	S	ANSGDSEDSKS(+79.97)DGIPAPVPDPAPVTVTPVEDTPASEQAR	11	39	Uncharacterized protein LOC113473650 OS=Diaphorina citri OX=121845 GN=LOC113473650 PE=4 SV=1	Uncharacterized protein LOC113473650	LOC113473650	40.25	3982.8	2	8	46	S11:Phosphorylation (STY):0.00	S18	DSEDSKSDGIPAP	1162.7	18887	1659.66	25514.6	15680.1	19388.2	Quantified	GO:0007010(BP:cytoskeleton organization);GO:0044763(NA:NA)
A0A3Q0J4L8	A0A3Q0J4L8|A0A3Q0J4L8_DIACI	S	ANSNGGSAGNTVTSSANAS(+79.97)PVTVR	19	24	Homer protein homolog 2 OS=Diaphorina citri OX=121845 GN=LOC103514750 PE=4 SV=1	Homer protein homolog 2	LOC103514750	46.32	2298.02	0.9	96	119	S19:Phosphorylation (STY):9.42	S114	TSSANASPVTVRG	1595.31	2695.78	1565.47	816.145	2297.07	2060.96	Quantified		K15010(NA)	ko04068(FoxO signaling pathway)	Cytoplasm	PF00568(WH1 domain)
A0A1S3D0N3	A0A1S3D0N3|A0A1S3D0N3_DIACI	S	ANSPEVEEDGESS(+79.97)FR	13	15	BTB/POZ domain-containing protein 9 isoform X1 OS=Diaphorina citri OX=121845 GN=LOC103508924 PE=4 SV=1	BTB/POZ domain-containing protein 9 isoform X1	LOC103508924	59.15	1731.66	-1.6	225	239	S13:Phosphorylation (STY):11.06	S237	EEDGESSFRAPIN	40.5464	74.3329	194.432	888.69	375.318	46.8016	Quantified					PF00651(BTB/POZ domain);PF07707(BTB And C-terminal Kelch)
A0A3Q0J9M3	A0A3Q0J9M3|A0A3Q0J9M3_DIACI	S	ANSVQVPSTPAS(+79.97)PFAK	12	16	Smoothelin-like protein 1 OS=Diaphorina citri OX=121845 GN=LOC108253423 PE=4 SV=1	Smoothelin-like protein 1	LOC108253423	37.35	1679.79	1.5	120	135	S12:Phosphorylation (STY):25.70	S131	VPSTPASPFAKFK	1544.67	1274.75	1366.59	789.35	677.338	1585.1	Quantified	GO:0015074(BP:DNA integration);GO:0003676(MF:nucleic acid binding)				PF00307(Calponin homology (CH) domain)
A0A3Q0JA09	A0A3Q0JA09|A0A3Q0JA09_DIACI	S	ANVVS(+79.97)DS(+79.97)EGSDAEPK	5	15	Another transcription unit protein OS=Diaphorina citri OX=121845 GN=LOC103515227 PE=4 SV=1	Another transcription unit protein	LOC103515227	39.23	1663.6	-0.8	311	325	S5:Phosphorylation (STY):15.48;S7:Phosphorylation (STY):0.00	S315	PKANVVSDSEGSD	2064.47	219.079	485.606	894.8	695.056	805.929	Quantified	GO:0016570(BP:histone modification);GO:0006368(BP:transcription elongation from RNA polymerase II promoter);GO:0016593(CC:Cdc73/Paf1 complex)				PF04004(Leo1-like protein)
A0A3Q0JA09	A0A3Q0JA09|A0A3Q0JA09_DIACI	S	ANVVS(+79.97)DS(+79.97)EGSDAEPK	7	15	Another transcription unit protein OS=Diaphorina citri OX=121845 GN=LOC103515227 PE=4 SV=1	Another transcription unit protein	LOC103515227	39.23	1663.6	-0.8	311	325	S5:Phosphorylation (STY):15.48;S7:Phosphorylation (STY):0.00	S317	ANVVSDSEGSDAE	2064.47	219.079	485.606	894.8	695.056	805.929	Quantified	GO:0016570(BP:histone modification);GO:0006368(BP:transcription elongation from RNA polymerase II promoter);GO:0016593(CC:Cdc73/Paf1 complex)				PF04004(Leo1-like protein)
A0A3Q0JA09	A0A3Q0JA09|A0A3Q0JA09_DIACI	S	ANVVS(+79.97)DSEGS(+79.97)DAEPK	5	15	Another transcription unit protein OS=Diaphorina citri OX=121845 GN=LOC103515227 PE=4 SV=1	Another transcription unit protein	LOC103515227	69.14	1663.6	-2.4	311	325	S5:Phosphorylation (STY):27.16;S10:Phosphorylation (STY):20.70	S315	PKANVVSDSEGSD	842.938	188.579	444.957	755.704	695.056	352.597	Quantified	GO:0016570(BP:histone modification);GO:0006368(BP:transcription elongation from RNA polymerase II promoter);GO:0016593(CC:Cdc73/Paf1 complex)				PF04004(Leo1-like protein)
A0A3Q0JA09	A0A3Q0JA09|A0A3Q0JA09_DIACI	S	ANVVS(+79.97)DSEGS(+79.97)DAEPK	10	15	Another transcription unit protein OS=Diaphorina citri OX=121845 GN=LOC103515227 PE=4 SV=1	Another transcription unit protein	LOC103515227	69.14	1663.6	-2.4	311	325	S5:Phosphorylation (STY):27.16;S10:Phosphorylation (STY):20.70	S320	VSDSEGSDAEPKE	842.938	188.579	444.957	755.704	695.056	352.597	Quantified	GO:0016570(BP:histone modification);GO:0006368(BP:transcription elongation from RNA polymerase II promoter);GO:0016593(CC:Cdc73/Paf1 complex)				PF04004(Leo1-like protein)
A0A3Q0JA09	A0A3Q0JA09|A0A3Q0JA09_DIACI	S	ANVVS(+79.97)DSEGSDAEPK	5	15	Another transcription unit protein OS=Diaphorina citri OX=121845 GN=LOC103515227 PE=4 SV=1	Another transcription unit protein	LOC103515227	54.27	1583.64	-1.3	311	325	S5:Phosphorylation (STY):11.10	S315	PKANVVSDSEGSD	113.281	303.121	1420.46	851.44	1874.18	798.945	Quantified	GO:0016570(BP:histone modification);GO:0006368(BP:transcription elongation from RNA polymerase II promoter);GO:0016593(CC:Cdc73/Paf1 complex)				PF04004(Leo1-like protein)
A0A3Q0JA09	A0A3Q0JA09|A0A3Q0JA09_DIACI	S	ANVVSDSEGS(+79.97)DAEPK	10	15	Another transcription unit protein OS=Diaphorina citri OX=121845 GN=LOC103515227 PE=4 SV=1	Another transcription unit protein	LOC103515227	58.25	1583.64	1.7	311	325	S10:Phosphorylation (STY):44.84	S320	VSDSEGSDAEPKE	826.109	296.104	605.673	3055.01	463.465	1398.11	Quantified	GO:0016570(BP:histone modification);GO:0006368(BP:transcription elongation from RNA polymerase II promoter);GO:0016593(CC:Cdc73/Paf1 complex)				PF04004(Leo1-like protein)
A0A3Q0JCR9	A0A3Q0JCR9|A0A3Q0JCR9_DIACI	S	APAATFAFS(+79.97)DEDED	9	14	Eukaryotic translation initiation factor 3 subunit C OS=Diaphorina citri OX=121845 GN=LOC103516288 PE=3 SV=1	Eukaryotic translation initiation factor 3 subunit C	LOC103516288	57.43	1564.56	-1.5	23	36	S9:Phosphorylation (STY):33.81	S31	AATFAFSDEDEDP	140.324	252.953	347.044	234.306	893.857	1655.74	Quantified	GO:0001732(BP:formation of cytoplasmic translation initiation complex);GO:0016282(CC:eukaryotic 43S preinitiation complex);GO:0033290(CC:eukaryotic 48S preinitiation complex);GO:0005852(CC:eukaryotic translation initiation factor 3 complex);GO:0003743(MF:translation initiation factor activity);GO:0031369(MF:translation initiation factor binding)			Cytoplasm	PF05470(Eukaryotic translation initiation factor 3 subunit 8 N-terminus);PF01399(PCI domain)
A0A3Q0JCR9	A0A3Q0JCR9|A0A3Q0JCR9_DIACI	S	APAATFAFS(+79.97)DEDEDPK	9	16	Eukaryotic translation initiation factor 3 subunit C OS=Diaphorina citri OX=121845 GN=LOC103516288 PE=3 SV=1	Eukaryotic translation initiation factor 3 subunit C	LOC103516288	64.06	1789.71	1.8	23	38	S9:Phosphorylation (STY):77.13	S31	AATFAFSDEDEDP	2256.2	2084.56	2342.92	3591.92	1226.65	1422.03	Quantified	GO:0001732(BP:formation of cytoplasmic translation initiation complex);GO:0016282(CC:eukaryotic 43S preinitiation complex);GO:0033290(CC:eukaryotic 48S preinitiation complex);GO:0005852(CC:eukaryotic translation initiation factor 3 complex);GO:0003743(MF:translation initiation factor activity);GO:0031369(MF:translation initiation factor binding)			Cytoplasm	PF05470(Eukaryotic translation initiation factor 3 subunit 8 N-terminus);PF01399(PCI domain)
A0A3Q0JCR9	A0A3Q0JCR9|A0A3Q0JCR9_DIACI	S	APAATFAFS(+79.97)DEDEDPKR	9	17	Eukaryotic translation initiation factor 3 subunit C OS=Diaphorina citri OX=121845 GN=LOC103516288 PE=3 SV=1	Eukaryotic translation initiation factor 3 subunit C	LOC103516288	76.32	1945.81	-3.6	23	39	S9:Phosphorylation (STY):93.66	S31	AATFAFSDEDEDP	261355	343873	362271	329648	241105	239443	Quantified	GO:0001732(BP:formation of cytoplasmic translation initiation complex);GO:0016282(CC:eukaryotic 43S preinitiation complex);GO:0033290(CC:eukaryotic 48S preinitiation complex);GO:0005852(CC:eukaryotic translation initiation factor 3 complex);GO:0003743(MF:translation initiation factor activity);GO:0031369(MF:translation initiation factor binding)			Cytoplasm	PF05470(Eukaryotic translation initiation factor 3 subunit 8 N-terminus);PF01399(PCI domain)
A0A3Q0JF97	A0A3Q0JF97|A0A3Q0JF97_DIACI	T	APDGT(+79.97)SIADATGGAGSNTHGVK	5	22	Bumetanide-sensitive sodium-(Potassium)-chloride cotransporter OS=Diaphorina citri OX=121845 GN=LOC103517981 PE=4 SV=1	Bumetanide-sensitive sodium-(Potassium)-chloride cotransporter	LOC103517981	44.88	2062.9	1.6	117	138	T5:Phosphorylation (STY):0.00	T121	QRAPDGTSIADAT	754.525	4498.1	4655.06	2080.8	1053.86	15056.3	Quantified	GO:0006811(BP:ion transport);GO:0016021(CC:integral component of membrane);GO:0022857(MF:transmembrane transporter activity)			Membrane;Multi-pass membrane protein	PF00324(Amino acid permease);PF03522(Solute carrier family 12)
A0A3Q0JF97	A0A3Q0JF97|A0A3Q0JF97_DIACI	S	APDGTS(+79.97)IADATGGAGSNTHGVK	6	22	Bumetanide-sensitive sodium-(Potassium)-chloride cotransporter OS=Diaphorina citri OX=121845 GN=LOC103517981 PE=4 SV=1	Bumetanide-sensitive sodium-(Potassium)-chloride cotransporter	LOC103517981	51.32	2062.9	1.6	117	138	S6:Phosphorylation (STY):0.00	S122	RAPDGTSIADATG	3753.86	4498.1	4225.86	21881.4	10685.4	15497.4	Quantified	GO:0006811(BP:ion transport);GO:0016021(CC:integral component of membrane);GO:0022857(MF:transmembrane transporter activity)			Membrane;Multi-pass membrane protein	PF00324(Amino acid permease);PF03522(Solute carrier family 12)
A0A3Q0JIK9	A0A3Q0JIK9|A0A3Q0JIK9_DIACI	S	APETTEKVS(+79.97)PAT(+79.97)PK	9	14	Protein NASP homolog OS=Diaphorina citri OX=121845 GN=LOC103519813 PE=4 SV=1	Protein NASP homolog	LOC103519813	42.87	1614.69	5.1	164	177	S9:Phosphorylation (STY):25.70;T12:Phosphorylation (STY):34.75	S172	ETTEKVSPATPKK	99.0522	80.9958	125.971	7474.08	756.241	1949.51	Quantified					PF10516(SHNi-TPR)
A0A3Q0JIK9	A0A3Q0JIK9|A0A3Q0JIK9_DIACI	T	APETTEKVS(+79.97)PAT(+79.97)PK	12	14	Protein NASP homolog OS=Diaphorina citri OX=121845 GN=LOC103519813 PE=4 SV=1	Protein NASP homolog	LOC103519813	42.87	1614.69	5.1	164	177	S9:Phosphorylation (STY):25.70;T12:Phosphorylation (STY):34.75	T175	EKVSPATPKKADG	99.0522	80.9958	125.971	7474.08	756.241	1949.51	Quantified					PF10516(SHNi-TPR)
A0A3Q0JKJ9	A0A3Q0JKJ9|A0A3Q0JKJ9_DIACI	S	APIAPSTPS(+79.97)PAIT(+79.97)PR	9	15	InaD-like protein OS=Diaphorina citri OX=121845 GN=LOC113472013 PE=4 SV=1	InaD-like protein	LOC113472013	46.07	1634.75	1.7	127	141	S9:Phosphorylation (STY):12.33;T13:Phosphorylation (STY):34.75	S135	IAPSTPSPAITPR	211.257	198.397	294.339	357.942	276.909	249.909	Quantified					PF00595(PDZ domain (Also known as DHR or GLGF))
A0A3Q0JKJ9	A0A3Q0JKJ9|A0A3Q0JKJ9_DIACI	T	APIAPSTPS(+79.97)PAIT(+79.97)PR	13	15	InaD-like protein OS=Diaphorina citri OX=121845 GN=LOC113472013 PE=4 SV=1	InaD-like protein	LOC113472013	46.07	1634.75	1.7	127	141	S9:Phosphorylation (STY):12.33;T13:Phosphorylation (STY):34.75	T139	TPSPAITPRNSKE	211.257	198.397	294.339	357.942	276.909	249.909	Quantified					PF00595(PDZ domain (Also known as DHR or GLGF))
A0A3Q0J1C4	A0A3Q0J1C4|A0A3Q0J1C4_DIACI	S	APIQLS(+79.97)R	6	7	LOW QUALITY PROTEIN: tectonin beta-propeller repeat-containing protein 1-like OS=Diaphorina citri OX=121845 GN=LOC103513190 PE=3 SV=1	LOW QUALITY PROTEIN: tectonin beta-propeller repeat-containing protein 1-like	LOC103513190	29.94	863.427	-4.2	379	385		S384	RAPIQLSRHSTQS	365.31	248.228	359.262	501.317	1099.93	313.167	Quantified	GO:0016021(CC:integral component of membrane);GO:0030246(MF:carbohydrate binding)				PF06462(Propeller);PF00337(Galactoside-binding lectin);PF06398(Integral peroxisomal membrane peroxin)
A0A3Q0IN42	A0A3Q0IN42|A0A3Q0IN42_DIACI	S	APLISHS(+79.97)PTEK	7	11	Uncharacterized protein LOC113465613 OS=Diaphorina citri OX=121845 GN=LOC113465613 PE=4 SV=1	Uncharacterized protein LOC113465613	LOC113465613	54.72	1258.6	-1.1	214	224	S7:Phosphorylation (STY):15.73	S220	APLISHSPTEKVS	2662.84	1380.28	2554.99	2159.24	1045.32	250.116	Quantified
A0A1S3D2U4	A0A1S3D2U4|A0A1S3D2U4_DIACI	S	APLS(+79.97)PELFSSR	4	11	Uncharacterized protein LOC103510201 OS=Diaphorina citri OX=121845 GN=LOC103510201 PE=4 SV=1	Uncharacterized protein LOC103510201	LOC103510201	45.25	1282.6	-7.1	1292	1302	S4:Phosphorylation (STY):25.58	S1295	ARRAPLSPELFSS	1475.06	386.341	1767.89	367.515	123.77	366.884	Quantified
A0A1S4EHT5	A0A1S4EHT5|A0A1S4EHT5_DIACI	S	APNITSAPTGVLFEDDS(+79.97)ADTLSPSVSR	17	27	Acyl-CoA Delta(11) desaturase isoform X1 OS=Diaphorina citri OX=121845 GN=LOC103514600 PE=3 SV=1	Acyl-CoA Delta(11) desaturase isoform X1	LOC103514600	45.67	2826.3	-0.1	2	28	S17:Phosphorylation (STY):3.64	S18	VLFEDDSADTLSP	498.111	303.641	458.054	448.147	1488.43	1213.18	Quantified	GO:0006633(BP:fatty acid biosynthetic process);GO:0016021(CC:integral component of membrane);GO:0016717(MF:oxidoreductase activity, acting on paired donors, with oxidation of a pair of donors resulting in the reduction of molecular oxygen to two molecules of water)	K00507(NA)	ko01040(Biosynthesis of unsaturated fatty acids);ko04152(AMPK signaling pathway);ko04936(Alcoholic liver disease)	Membrane;Multi-pass membrane protein	PF00487(Fatty acid desaturase)
A0A1S3DU41	A0A1S3DU41|A0A1S3DU41_DIACI	Y	APNY(+79.97)SPYSSQNSNQSNSSVVQQSFSSQTVR	4	30	Adhesive plaque matrix protein-like OS=Diaphorina citri OX=121845 GN=LOC103524757 PE=4 SV=1	Adhesive plaque matrix protein-like	LOC103524757	71.39	3357.45	2.3	305	334	Y4:Phosphorylation (STY):0.00	Y308	QFRAPNYSPYSSQ	10537.8	7573.6	6801.89	1524.07	8811.29	7338.27	Quantified
A0A1S3DU41	A0A1S3DU41|A0A1S3DU41_DIACI	S	APNYS(+79.97)PYSSQNSNQSNSSVVQQSFSSQTVR	5	30	Adhesive plaque matrix protein-like OS=Diaphorina citri OX=121845 GN=LOC103524757 PE=4 SV=1	Adhesive plaque matrix protein-like	LOC103524757	81.58	3357.45	2.3	305	334	S5:Phosphorylation (STY):17.01	S309	FRAPNYSPYSSQN	628.46	1954.7	5361.68	1049.62	8811.29	3178.83	Quantified
A0A1S3DU41	A0A1S3DU41|A0A1S3DU41_DIACI	S	APNYSPYS(+79.97)S(+79.97)QNSNQSNSSVVQQSFSSQTVR	8	30	Adhesive plaque matrix protein-like OS=Diaphorina citri OX=121845 GN=LOC103524757 PE=4 SV=1	Adhesive plaque matrix protein-like	LOC103524757	51.18	3437.42	3	305	334	S8:Phosphorylation (STY):0.00;S9:Phosphorylation (STY):0.00	S312	PNYSPYSSQNSNQ	904.253	157.486	639.282	221.212	898.083	702.367	Quantified
A0A1S3DU41	A0A1S3DU41|A0A1S3DU41_DIACI	S	APNYSPYS(+79.97)S(+79.97)QNSNQSNSSVVQQSFSSQTVR	9	30	Adhesive plaque matrix protein-like OS=Diaphorina citri OX=121845 GN=LOC103524757 PE=4 SV=1	Adhesive plaque matrix protein-like	LOC103524757	51.18	3437.42	3	305	334	S8:Phosphorylation (STY):0.00;S9:Phosphorylation (STY):0.00	S313	NYSPYSSQNSNQS	904.253	157.486	639.282	221.212	898.083	702.367	Quantified
A0A1S3DU41	A0A1S3DU41|A0A1S3DU41_DIACI	S	APNYSPYS(+79.97)SQNSNQS(+79.97)NSSVVQQSFSSQTVR	8	30	Adhesive plaque matrix protein-like OS=Diaphorina citri OX=121845 GN=LOC103524757 PE=4 SV=1	Adhesive plaque matrix protein-like	LOC103524757	61.38	3437.42	3.5	305	334	S8:Phosphorylation (STY):0.00;S15:Phosphorylation (STY):0.00	S312	PNYSPYSSQNSNQ	904.253	881.056	759.264	59.5342	654.005	702.367	Quantified
A0A1S3DU41	A0A1S3DU41|A0A1S3DU41_DIACI	S	APNYSPYS(+79.97)SQNSNQS(+79.97)NSSVVQQSFSSQTVR	15	30	Adhesive plaque matrix protein-like OS=Diaphorina citri OX=121845 GN=LOC103524757 PE=4 SV=1	Adhesive plaque matrix protein-like	LOC103524757	61.38	3437.42	3.5	305	334	S8:Phosphorylation (STY):0.00;S15:Phosphorylation (STY):0.00	S319	SQNSNQSNSSVVQ	904.253	881.056	759.264	59.5342	654.005	702.367	Quantified
A0A1S3DU41	A0A1S3DU41|A0A1S3DU41_DIACI	S	APNYSPYSSQNS(+79.97)NQS(+79.97)NSSVVQQSFSSQTVR	12	30	Adhesive plaque matrix protein-like OS=Diaphorina citri OX=121845 GN=LOC103524757 PE=4 SV=1	Adhesive plaque matrix protein-like	LOC103524757	47.31	3437.42	4.1	305	334	S12:Phosphorylation (STY):0.00;S15:Phosphorylation (STY):0.00	S316	PYSSQNSNQSNSS	538.426	157.486	1067.49	283.32	700.667	398.053	Quantified
A0A1S3DU41	A0A1S3DU41|A0A1S3DU41_DIACI	S	APNYSPYSSQNS(+79.97)NQS(+79.97)NSSVVQQSFSSQTVR	15	30	Adhesive plaque matrix protein-like OS=Diaphorina citri OX=121845 GN=LOC103524757 PE=4 SV=1	Adhesive plaque matrix protein-like	LOC103524757	47.31	3437.42	4.1	305	334	S12:Phosphorylation (STY):0.00;S15:Phosphorylation (STY):0.00	S319	SQNSNQSNSSVVQ	538.426	157.486	1067.49	283.32	700.667	398.053	Quantified
A0A1S3DU41	A0A1S3DU41|A0A1S3DU41_DIACI	S	APNYSPYSSQNS(+79.97)NQSNSS(+79.97)VVQQSFSSQTVR	12	30	Adhesive plaque matrix protein-like OS=Diaphorina citri OX=121845 GN=LOC103524757 PE=4 SV=1	Adhesive plaque matrix protein-like	LOC103524757	55.99	3437.42	7.5	305	334	S12:Phosphorylation (STY):0.00;S18:Phosphorylation (STY):0.00	S316	PYSSQNSNQSNSS	1860.45	340.454	462.904	164.204	436.243	480.157	Quantified
A0A1S3DU41	A0A1S3DU41|A0A1S3DU41_DIACI	S	APNYSPYSSQNS(+79.97)NQSNSS(+79.97)VVQQSFSSQTVR	18	30	Adhesive plaque matrix protein-like OS=Diaphorina citri OX=121845 GN=LOC103524757 PE=4 SV=1	Adhesive plaque matrix protein-like	LOC103524757	55.99	3437.42	7.5	305	334	S12:Phosphorylation (STY):0.00;S18:Phosphorylation (STY):0.00	S322	SNQSNSSVVQQSF	1860.45	340.454	462.904	164.204	436.243	480.157	Quantified
A0A1S3DU41	A0A1S3DU41|A0A1S3DU41_DIACI	S	APNYSPYSSQNS(+79.97)NQSNSSVVQQSFSSQTVR	12	30	Adhesive plaque matrix protein-like OS=Diaphorina citri OX=121845 GN=LOC103524757 PE=4 SV=1	Adhesive plaque matrix protein-like	LOC103524757	92.9	3357.45	2.2	305	334	S12:Phosphorylation (STY):3.29	S316	PYSSQNSNQSNSS	23426.9	14585.6	13471.5	1882.71	5081.11	14586.8	Quantified
A0A1S3DU41	A0A1S3DU41|A0A1S3DU41_DIACI	S	APNYSPYSSQNSNQS(+79.97)NS(+79.97)SVVQQSFSSQTVR	15	30	Adhesive plaque matrix protein-like OS=Diaphorina citri OX=121845 GN=LOC103524757 PE=4 SV=1	Adhesive plaque matrix protein-like	LOC103524757	33.76	3437.42	5.5	305	334	S15:Phosphorylation (STY):0.00;S17:Phosphorylation (STY):0.00	S319	SQNSNQSNSSVVQ	143.193	881.056	862.316	1143.83	1284.17	248.495	Quantified
A0A1S3DU41	A0A1S3DU41|A0A1S3DU41_DIACI	S	APNYSPYSSQNSNQS(+79.97)NS(+79.97)SVVQQSFSSQTVR	17	30	Adhesive plaque matrix protein-like OS=Diaphorina citri OX=121845 GN=LOC103524757 PE=4 SV=1	Adhesive plaque matrix protein-like	LOC103524757	33.76	3437.42	5.5	305	334	S15:Phosphorylation (STY):0.00;S17:Phosphorylation (STY):0.00	S321	NSNQSNSSVVQQS	143.193	881.056	862.316	1143.83	1284.17	248.495	Quantified
A0A1S3DU41	A0A1S3DU41|A0A1S3DU41_DIACI	S	APNYSPYSSQNSNQS(+79.97)NSS(+79.97)VVQQSFSSQTVR	15	30	Adhesive plaque matrix protein-like OS=Diaphorina citri OX=121845 GN=LOC103524757 PE=4 SV=1	Adhesive plaque matrix protein-like	LOC103524757	50.16	3437.42	0.1	305	334	S15:Phosphorylation (STY):0.00;S18:Phosphorylation (STY):0.00	S319	SQNSNQSNSSVVQ	538.426	479.319	759.264	469.613	654.005	502.586	Quantified
A0A1S3DU41	A0A1S3DU41|A0A1S3DU41_DIACI	S	APNYSPYSSQNSNQS(+79.97)NSS(+79.97)VVQQSFSSQTVR	18	30	Adhesive plaque matrix protein-like OS=Diaphorina citri OX=121845 GN=LOC103524757 PE=4 SV=1	Adhesive plaque matrix protein-like	LOC103524757	50.16	3437.42	0.1	305	334	S15:Phosphorylation (STY):0.00;S18:Phosphorylation (STY):0.00	S322	SNQSNSSVVQQSF	538.426	479.319	759.264	469.613	654.005	502.586	Quantified
A0A1S3DU41	A0A1S3DU41|A0A1S3DU41_DIACI	S	APNYSPYSSQNSNQSNS(+79.97)S(+79.97)VVQQSFSSQTVR	17	30	Adhesive plaque matrix protein-like OS=Diaphorina citri OX=121845 GN=LOC103524757 PE=4 SV=1	Adhesive plaque matrix protein-like	LOC103524757	41.77	3437.42	0.4	305	334	S17:Phosphorylation (STY):0.00;S18:Phosphorylation (STY):0.00	S321	NSNQSNSSVVQQS	143.241	313.54	416.332	518.465	436.243	398.053	Quantified
A0A1S3DU41	A0A1S3DU41|A0A1S3DU41_DIACI	S	APNYSPYSSQNSNQSNS(+79.97)S(+79.97)VVQQSFSSQTVR	18	30	Adhesive plaque matrix protein-like OS=Diaphorina citri OX=121845 GN=LOC103524757 PE=4 SV=1	Adhesive plaque matrix protein-like	LOC103524757	41.77	3437.42	0.4	305	334	S17:Phosphorylation (STY):0.00;S18:Phosphorylation (STY):0.00	S322	SNQSNSSVVQQSF	143.241	313.54	416.332	518.465	436.243	398.053	Quantified
A0A1S3DU41	A0A1S3DU41|A0A1S3DU41_DIACI	S	APNYSPYSSQNSNQSNSS(+79.97)VVQQSFSSQTVR	18	30	Adhesive plaque matrix protein-like OS=Diaphorina citri OX=121845 GN=LOC103524757 PE=4 SV=1	Adhesive plaque matrix protein-like	LOC103524757	31.47	3357.45	6.1	305	334	S18:Phosphorylation (STY):0.00	S322	SNQSNSSVVQQSF	136.055	14585.6	13471.5	246.094	2378.08	449.666	Quantified
A0A3Q0J5H7	A0A3Q0J5H7|A0A3Q0J5H7_DIACI	T	APPALT(+79.97)RSPPK	6	11	PDZ and LIM domain protein Zasp-like OS=Diaphorina citri OX=121845 GN=LOC103515161 PE=4 SV=1	PDZ and LIM domain protein Zasp-like	LOC103515161	47.76	1213.62	-1.2	368	378	T6:Phosphorylation (STY):0.00	T373	KAPPALTRSPPKE	1238.31	9230.47	1461.7	477.266	3296.48	886.233	Quantified	GO:0046872(MF:metal ion binding)				PF15936(Domain of unknown function (DUF4749));PF00412(LIM domain)
A0A3Q0J5H7	A0A3Q0J5H7|A0A3Q0J5H7_DIACI	S	APPALTRS(+79.97)PPK	8	11	PDZ and LIM domain protein Zasp-like OS=Diaphorina citri OX=121845 GN=LOC103515161 PE=4 SV=1	PDZ and LIM domain protein Zasp-like	LOC103515161	58.78	1213.62	-1.3	368	378	S8:Phosphorylation (STY):7.32	S375	PPALTRSPPKESK	291.067	9230.47	1461.7	2727.06	1876.09	4048.39	Quantified	GO:0046872(MF:metal ion binding)				PF15936(Domain of unknown function (DUF4749));PF00412(LIM domain)
A0A3Q0IYG6	A0A3Q0IYG6|A0A3Q0IYG6_DIACI	T	APPQPPT(+79.97)SPPPQIPVR	7	16	Uncharacterized protein LOC103511847 OS=Diaphorina citri OX=121845 GN=LOC103511847 PE=4 SV=1	Uncharacterized protein LOC103511847	LOC103511847	32.18	1757.89	-1.2	289	304	T7:Phosphorylation (STY):0.00	T295	APPQPPTSPPPQI	710.629	1451.1	758.611	119.789	1293.88	321.502	Quantified	GO:0070830(BP:bicellular tight junction assembly);GO:0090162(BP:establishment of epithelial cell polarity)				PF00625(Guanylate kinase);PF00595(PDZ domain (Also known as DHR or GLGF))
A0A3Q0IYG6	A0A3Q0IYG6|A0A3Q0IYG6_DIACI	S	APPQPPTS(+79.97)PPPQIPVR	8	16	Uncharacterized protein LOC103511847 OS=Diaphorina citri OX=121845 GN=LOC103511847 PE=4 SV=1	Uncharacterized protein LOC103511847	LOC103511847	35.07	1757.89	1.3	289	304	S8:Phosphorylation (STY):0.00	S296	PPQPPTSPPPQIP	710.629	1451.1	335.052	872.528	587.026	238.793	Quantified	GO:0070830(BP:bicellular tight junction assembly);GO:0090162(BP:establishment of epithelial cell polarity)				PF00625(Guanylate kinase);PF00595(PDZ domain (Also known as DHR or GLGF))
A0A3R5W3Q3	A0A3R5W3Q3|A0A3R5W3Q3_DIACI:A0A6G5VBK4|A0A6G5VBK4_DIACI:A0A1S3D474|A0A1S3D474_DIACI	T	APQIVLLDEAT(+79.97)SALDTK	11	17	ATP-binding cassette sub-family B member 6 OS=Diaphorina citri OX=121845 GN=ABCB2 PE=2 SV=1	ATP-binding cassette sub-family B member 6	ABCB2	69.49	1863.92	2.4	731	747	T11:Phosphorylation (STY):0.00	T741	VLLDEATSALDTK	980.009	1350.12	918.833	1658.54	711.216	618.689	Quantified	GO:0016021(CC:integral component of membrane);GO:0005524(MF:ATP binding);GO:0016887(MF:ATPase activity);GO:0042626(MF:ATPase activity, coupled to transmembrane movement of substances)	K05661(NA)	ko02010(ABC transporters)	Early endosome membrane;Endosome membrane;Endosome;multivesicular body membrane;Golgi apparatus membrane;Multi-pass membrane protein;Late endosome membrane;Lysosome membrane;Melanosome membrane;Membrane;Mitochondrion outer membrane;Secreted;extracellular exosome	PF00005(ABC transporter);PF16185(Mitochondrial ABC-transporter N-terminal five TM region);PF00664(ABC transporter transmembrane region)
A0A3R5W3Q3	A0A3R5W3Q3|A0A3R5W3Q3_DIACI:A0A6G5VBK4|A0A6G5VBK4_DIACI:A0A1S3D474|A0A1S3D474_DIACI	S	APQIVLLDEATS(+79.97)ALDTK	12	17	ATP-binding cassette sub-family B member 6 OS=Diaphorina citri OX=121845 GN=ABCB2 PE=2 SV=1	ATP-binding cassette sub-family B member 6	ABCB2	77.04	1863.92	1.8	731	747	S12:Phosphorylation (STY):8.69	S742	LLDEATSALDTKT	459.924	1350.12	141.77	2290.94	2153.78	369.674	Quantified	GO:0016021(CC:integral component of membrane);GO:0005524(MF:ATP binding);GO:0016887(MF:ATPase activity);GO:0042626(MF:ATPase activity, coupled to transmembrane movement of substances)	K05661(NA)	ko02010(ABC transporters)	Early endosome membrane;Endosome membrane;Endosome;multivesicular body membrane;Golgi apparatus membrane;Multi-pass membrane protein;Late endosome membrane;Lysosome membrane;Melanosome membrane;Membrane;Mitochondrion outer membrane;Secreted;extracellular exosome	PF00005(ABC transporter);PF16185(Mitochondrial ABC-transporter N-terminal five TM region);PF00664(ABC transporter transmembrane region)
A0A3Q0IPK2	A0A3Q0IPK2|A0A3Q0IPK2_DIACI:A0A3Q0IU82|A0A3Q0IU82_DIACI	S	APS(+79.97)EGSLSLDTSR	3	13	Dystrobrevin OS=Diaphorina citri OX=121845 GN=LOC103507588 PE=3 SV=1	Dystrobrevin	LOC103507588	42.52	1398.6	5.6	368	380	S3:Phosphorylation (STY):29.32	S370	SVGKAPSEGSLSL	1584.49	2030.13	1563.11	1589.12	559.333	1311.76	Quantified	GO:0005737(CC:cytoplasm);GO:0008270(MF:zinc ion binding)			Cytoplasm	PF00569(Zinc finger, ZZ type);PF09069(EF-hand);PF09068(EF hand)
A0A3Q0JE17	A0A3Q0JE17|A0A3Q0JE17_DIACI	S	APS(+79.97)LEEKPSSEEVIVDNMDQSNTNIIPETR	3	30	Mediator of RNA polymerase II transcription subunit 24 OS=Diaphorina citri OX=121845 GN=LOC103517291 PE=4 SV=1	Mediator of RNA polymerase II transcription subunit 24	LOC103517291	27.08	3421.56	0.2	285	314	S3:Phosphorylation (STY):9.27	S287	STVKAPSLEEKPS	287.857	584	198.918	160.172	273.31	47.4426	Quantified
A0A1S3DUM2	A0A1S3DUM2|A0A1S3DUM2_DIACI	S	APS(+79.97)MEITPQIIENTIC(+57.02)K	3	17	Ubiquitin conjugation factor E4 B OS=Diaphorina citri OX=121845 GN=LOC103525021 PE=3 SV=1	Ubiquitin conjugation factor E4 B	LOC103525021	55.35	2023.94	1.5	101	117	S3:Phosphorylation (STY):42.68;C16:Carbamidomethylation:1000.00	S103	KIVKAPSMEITPQ	177.83	1354.96	1003.38	143.635	1009.66	1524.96	Quantified	GO:0006511(BP:ubiquitin-dependent protein catabolic process);GO:0000151(CC:ubiquitin ligase complex);GO:0034450(MF:ubiquitin-ubiquitin ligase activity)	K10597(NA)	ko04120(Ubiquitin mediated proteolysis);ko04141(Protein processing in endoplasmic reticulum)	Cytoplasm	PF10408(Ubiquitin elongating factor core);PF04564(U-box domain)
A0A1S3DA04	A0A1S3DA04|A0A1S3DA04_DIACI	S	APS(+79.97)PDFER	3	8	LOW QUALITY PROTEIN: uncharacterized protein LOC103513589 OS=Diaphorina citri OX=121845 GN=LOC103513589 PE=3 SV=1	LOW QUALITY PROTEIN: uncharacterized protein LOC103513589	LOC103513589	53.7	997.391	-2.7	142	149		S144	GNTRAPSPDFERL	46338.6	1485.91	32618	67567.2	52818.6	51202.5	Quantified					PF05903(PPPDE putative peptidase domain)
A0A1S3DDG3	A0A1S3DDG3|A0A1S3DDG3_DIACI:A0A3Q0JCJ5|A0A3Q0JCJ5_DIACI:A0A1S3DDB5|A0A1S3DDB5_DIACI:A0A1S3DDP0|A0A1S3DDP0_DIACI	S	APS(+79.97)PHHPT(+79.97)SPSSGPGSLPLHR	3	21	Patronin-like isoform X1 OS=Diaphorina citri OX=121845 GN=LOC103516482 PE=3 SV=1	Patronin-like isoform X1	LOC103516482	28.19	2274.99	-2.5	285	305	S3:Phosphorylation (STY):13.13;T8:Phosphorylation (STY):0.00	S287	PSRRAPSPHHPTS	1218.55	289.159	293.084	724.715	320.706	610.056	Quantified	GO:0005874(CC:microtubule);GO:0005516(MF:calmodulin binding);GO:0008017(MF:microtubule binding)				PF08683(Microtubule-binding calmodulin-regulated spectrin-associated)
A0A1S3DDG3	A0A1S3DDG3|A0A1S3DDG3_DIACI:A0A3Q0JCJ5|A0A3Q0JCJ5_DIACI:A0A1S3DDB5|A0A1S3DDB5_DIACI:A0A1S3DDP0|A0A1S3DDP0_DIACI	T	APS(+79.97)PHHPT(+79.97)SPSSGPGSLPLHR	8	21	Patronin-like isoform X1 OS=Diaphorina citri OX=121845 GN=LOC103516482 PE=3 SV=1	Patronin-like isoform X1	LOC103516482	28.19	2274.99	-2.5	285	305	S3:Phosphorylation (STY):13.13;T8:Phosphorylation (STY):0.00	T292	PSPHHPTSPSSGP	1218.55	289.159	293.084	724.715	320.706	610.056	Quantified	GO:0005874(CC:microtubule);GO:0005516(MF:calmodulin binding);GO:0008017(MF:microtubule binding)				PF08683(Microtubule-binding calmodulin-regulated spectrin-associated)
A0A1S3DDG3	A0A1S3DDG3|A0A1S3DDG3_DIACI:A0A3Q0JCJ5|A0A3Q0JCJ5_DIACI:A0A1S3DDB5|A0A1S3DDB5_DIACI:A0A1S3DDP0|A0A1S3DDP0_DIACI	S	APS(+79.97)PHHPTSPSSGPGSLPLHR	3	21	Patronin-like isoform X1 OS=Diaphorina citri OX=121845 GN=LOC103516482 PE=3 SV=1	Patronin-like isoform X1	LOC103516482	58.95	2195.03	-0.9	285	305	S3:Phosphorylation (STY):19.39	S287	PSRRAPSPHHPTS	7442.7	4375.03	12004.5	11474.3	9081.6	5943.15	Quantified	GO:0005874(CC:microtubule);GO:0005516(MF:calmodulin binding);GO:0008017(MF:microtubule binding)				PF08683(Microtubule-binding calmodulin-regulated spectrin-associated)
A0A3Q0IW68	A0A3Q0IW68|A0A3Q0IW68_DIACI	S	APS(+79.97)PPPNC(+57.02)DVFVEFNLPPPPC(+57.02)PSAPQVNPVDVTVEK	3	36	Rho GTPase-activating protein gacF OS=Diaphorina citri OX=121845 GN=LOC103510749 PE=4 SV=1	Rho GTPase-activating protein gacF	LOC103510749	58.56	3990.86	1.5	355	390	S3:Phosphorylation (STY):21.71;C8:Carbamidomethylation:1000.00;C21:Carbamidomethylation:1000.00	S357	NKHRAPSPPPNCD	863.016	727.221	679.153		2848.24	2793.66	Quantified
A0A3Q0JC24	A0A3Q0JC24|A0A3Q0JC24_DIACI	S	APS(+79.97)PPRPMSR	3	10	Neither inactivation nor afterpotential protein C-like OS=Diaphorina citri OX=121845 GN=LOC103518375 PE=3 SV=1	Neither inactivation nor afterpotential protein C-like	LOC103518375	27.44	1174.53	5.2	913	922	S3:Phosphorylation (STY):33.66	S915	KKQRAPSPPRPMS	1028.39	1447.09	513.936	380.389	1078.92	1098.08	Quantified	GO:0016459(CC:myosin complex);GO:0003779(MF:actin binding);GO:0005524(MF:ATP binding);GO:0003774(MF:motor activity);GO:0004713(MF:protein tyrosine kinase activity)			Cytoplasm;cytoskeleton	PF00612(IQ calmodulin-binding motif);PF00063(Myosin head (motor domain));PF00069(Protein kinase domain)
A0A3Q0IPJ2	A0A3Q0IPJ2|A0A3Q0IPJ2_DIACI	S	APS(+79.97)PSVET(+79.97)PIEPSLTSVPTAAK	3	22	LOW QUALITY PROTEIN: obscurin-like OS=Diaphorina citri OX=121845 GN=LOC103507575 PE=3 SV=1	LOW QUALITY PROTEIN: obscurin-like	LOC103507575	36.19	2338.07	-1.6	565	586	S3:Phosphorylation (STY):0.00;T8:Phosphorylation (STY):17.91	S567	ETTKAPSPSVETP	518.973	576.088	520.005	1574.2	299.877	1925.02	Quantified	GO:0005524(MF:ATP binding);GO:0005085(MF:guanyl-nucleotide exchange factor activity);GO:0004672(MF:protein kinase activity)				PF00621(RhoGEF domain);PF00069(Protein kinase domain);PF00041(Fibronectin type III domain);PF07679(Immunoglobulin I-set domain)
A0A3Q0IPJ2	A0A3Q0IPJ2|A0A3Q0IPJ2_DIACI	T	APS(+79.97)PSVET(+79.97)PIEPSLTSVPTAAK	8	22	LOW QUALITY PROTEIN: obscurin-like OS=Diaphorina citri OX=121845 GN=LOC103507575 PE=3 SV=1	LOW QUALITY PROTEIN: obscurin-like	LOC103507575	36.19	2338.07	-1.6	565	586	S3:Phosphorylation (STY):0.00;T8:Phosphorylation (STY):17.91	T572	PSPSVETPIEPSL	518.973	576.088	520.005	1574.2	299.877	1925.02	Quantified	GO:0005524(MF:ATP binding);GO:0005085(MF:guanyl-nucleotide exchange factor activity);GO:0004672(MF:protein kinase activity)				PF00621(RhoGEF domain);PF00069(Protein kinase domain);PF00041(Fibronectin type III domain);PF07679(Immunoglobulin I-set domain)
A0A3Q0IPJ2	A0A3Q0IPJ2|A0A3Q0IPJ2_DIACI	S	APS(+79.97)PSVETPIEPSLTSVPTAAK	3	22	LOW QUALITY PROTEIN: obscurin-like OS=Diaphorina citri OX=121845 GN=LOC103507575 PE=3 SV=1	LOW QUALITY PROTEIN: obscurin-like	LOC103507575	82.46	2258.11	2.6	565	586	S3:Phosphorylation (STY):28.86	S567	ETTKAPSPSVETP	489169	582297	686680	745366	260750	355112	Quantified	GO:0005524(MF:ATP binding);GO:0005085(MF:guanyl-nucleotide exchange factor activity);GO:0004672(MF:protein kinase activity)				PF00621(RhoGEF domain);PF00069(Protein kinase domain);PF00041(Fibronectin type III domain);PF07679(Immunoglobulin I-set domain)
A0A3Q0J275	A0A3Q0J275|A0A3Q0J275_DIACI	S	APS(+79.97)PT(+79.97)SEEEPPR	3	12	Serine/arginine repetitive matrix protein 1-like OS=Diaphorina citri OX=121845 GN=LOC113469242 PE=4 SV=1	Serine/arginine repetitive matrix protein 1-like	LOC113469242	24.3	1455.53	4.2	146	157	S3:Phosphorylation (STY):7.77;T5:Phosphorylation (STY):0.00	S148	NKNRAPSPTSEEE	6885.96	242.427	94.4504	3263.25	6562.04	5400.17	Quantified
A0A3Q0J275	A0A3Q0J275|A0A3Q0J275_DIACI	T	APS(+79.97)PT(+79.97)SEEEPPR	5	12	Serine/arginine repetitive matrix protein 1-like OS=Diaphorina citri OX=121845 GN=LOC113469242 PE=4 SV=1	Serine/arginine repetitive matrix protein 1-like	LOC113469242	24.3	1455.53	4.2	146	157	S3:Phosphorylation (STY):7.77;T5:Phosphorylation (STY):0.00	T150	NRAPSPTSEEEPP	6885.96	242.427	94.4504	3263.25	6562.04	5400.17	Quantified
A0A3Q0J275	A0A3Q0J275|A0A3Q0J275_DIACI	S	APS(+79.97)PTS(+79.97)EEEPPR	3	12	Serine/arginine repetitive matrix protein 1-like OS=Diaphorina citri OX=121845 GN=LOC113469242 PE=4 SV=1	Serine/arginine repetitive matrix protein 1-like	LOC113469242	36.31	1455.53	-1.1	146	157	S3:Phosphorylation (STY):11.10;S6:Phosphorylation (STY):0.00	S148	NKNRAPSPTSEEE	6885.96	1221.03	4077.9	3263.25	6562.04	5400.17	Quantified
A0A3Q0J275	A0A3Q0J275|A0A3Q0J275_DIACI	S	APS(+79.97)PTS(+79.97)EEEPPR	6	12	Serine/arginine repetitive matrix protein 1-like OS=Diaphorina citri OX=121845 GN=LOC113469242 PE=4 SV=1	Serine/arginine repetitive matrix protein 1-like	LOC113469242	36.31	1455.53	-1.1	146	157	S3:Phosphorylation (STY):11.10;S6:Phosphorylation (STY):0.00	S151	RAPSPTSEEEPPR	6885.96	1221.03	4077.9	3263.25	6562.04	5400.17	Quantified
A0A3Q0J8W1	A0A3Q0J8W1|A0A3Q0J8W1_DIACI	S	APS(+79.97)TEM(+15.99)FIGPHEVFSR	3	16	Neurofilament heavy polypeptide-like OS=Diaphorina citri OX=121845 GN=LOC113470579 PE=4 SV=1	Neurofilament heavy polypeptide-like	LOC113470579	41.78	1899.82	2.4	346	361	S3:Phosphorylation (STY):17.01;M6:Oxidation (M):1000.00	S348	PVKKAPSTEMFIG	3966.94	5244.65	7813.95	6760.99	4596.79	3148.78	Quantified
A0A3Q0J8W1	A0A3Q0J8W1|A0A3Q0J8W1_DIACI	S	APS(+79.97)TEMFIGPHEVFSR	3	16	Neurofilament heavy polypeptide-like OS=Diaphorina citri OX=121845 GN=LOC113470579 PE=4 SV=1	Neurofilament heavy polypeptide-like	LOC113470579	66.25	1883.83	2.4	346	361	S3:Phosphorylation (STY):23.10	S348	PVKKAPSTEMFIG	812.763	37744	47171.4	24977.9	8060.98	20366	Quantified
A0A3Q0ISR7	A0A3Q0ISR7|A0A3Q0ISR7_DIACI:A0A1S3CW76|A0A1S3CW76_DIACI	S	APSNES(+79.97)PPVTDTNAK	6	15	Ubiquitin domain-containing protein UBFD1 isoform X2 OS=Diaphorina citri OX=121845 GN=LOC103506425 PE=4 SV=1	Ubiquitin domain-containing protein UBFD1 isoform X2	LOC103506425	58.2	1606.69	1.5	33	47	S6:Phosphorylation (STY):7.77	S38	KAPSNESPPVTDT	7555.55	9166.04	7329.14	12360.4	8205.35	8412.12	Quantified					PF00240(Ubiquitin family)
A0A1S3DDG3	A0A1S3DDG3|A0A1S3DDG3_DIACI:A0A3Q0JCJ5|A0A3Q0JCJ5_DIACI:A0A1S3DDB5|A0A1S3DDB5_DIACI:A0A1S3DDP0|A0A1S3DDP0_DIACI	T	APSPHHPT(+79.97)SPSSGPGSLPLHR	8	21	Patronin-like isoform X1 OS=Diaphorina citri OX=121845 GN=LOC103516482 PE=3 SV=1	Patronin-like isoform X1	LOC103516482	56.78	2195.03	-3	285	305	T8:Phosphorylation (STY):8.14	T292	PSPHHPTSPSSGP	3670.76	1312.87	5235.26	7004.69	6194.83	5573.88	Quantified	GO:0005874(CC:microtubule);GO:0005516(MF:calmodulin binding);GO:0008017(MF:microtubule binding)				PF08683(Microtubule-binding calmodulin-regulated spectrin-associated)
A0A1S3DDG3	A0A1S3DDG3|A0A1S3DDG3_DIACI:A0A3Q0JCJ5|A0A3Q0JCJ5_DIACI:A0A1S3DDB5|A0A1S3DDB5_DIACI:A0A1S3DDP0|A0A1S3DDP0_DIACI	S	APSPHHPTS(+79.97)PSSGPGSLPLHR	9	21	Patronin-like isoform X1 OS=Diaphorina citri OX=121845 GN=LOC103516482 PE=3 SV=1	Patronin-like isoform X1	LOC103516482	60.64	2195.03	3.2	285	305	S9:Phosphorylation (STY):0.00	S293	SPHHPTSPSSGPG	3670.76	298.862	5235.26	3953.78	5657.53	5143.08	Quantified	GO:0005874(CC:microtubule);GO:0005516(MF:calmodulin binding);GO:0008017(MF:microtubule binding)				PF08683(Microtubule-binding calmodulin-regulated spectrin-associated)
A0A3Q0IPJ2	A0A3Q0IPJ2|A0A3Q0IPJ2_DIACI	S	APSPS(+79.97)VET(+79.97)PIEPSLTSVPTAAK	5	22	LOW QUALITY PROTEIN: obscurin-like OS=Diaphorina citri OX=121845 GN=LOC103507575 PE=3 SV=1	LOW QUALITY PROTEIN: obscurin-like	LOC103507575	25.76	2338.07	2.3	565	586	S5:Phosphorylation (STY):0.00;T8:Phosphorylation (STY):5.81	S569	TKAPSPSVETPIE	725.167	723.437	1611.1	1574.2	637.046	1925.02	Quantified	GO:0005524(MF:ATP binding);GO:0005085(MF:guanyl-nucleotide exchange factor activity);GO:0004672(MF:protein kinase activity)				PF00621(RhoGEF domain);PF00069(Protein kinase domain);PF00041(Fibronectin type III domain);PF07679(Immunoglobulin I-set domain)
A0A3Q0IPJ2	A0A3Q0IPJ2|A0A3Q0IPJ2_DIACI	T	APSPS(+79.97)VET(+79.97)PIEPSLTSVPTAAK	8	22	LOW QUALITY PROTEIN: obscurin-like OS=Diaphorina citri OX=121845 GN=LOC103507575 PE=3 SV=1	LOW QUALITY PROTEIN: obscurin-like	LOC103507575	25.76	2338.07	2.3	565	586	S5:Phosphorylation (STY):0.00;T8:Phosphorylation (STY):5.81	T572	PSPSVETPIEPSL	725.167	723.437	1611.1	1574.2	637.046	1925.02	Quantified	GO:0005524(MF:ATP binding);GO:0005085(MF:guanyl-nucleotide exchange factor activity);GO:0004672(MF:protein kinase activity)				PF00621(RhoGEF domain);PF00069(Protein kinase domain);PF00041(Fibronectin type III domain);PF07679(Immunoglobulin I-set domain)
A0A3Q0IPJ2	A0A3Q0IPJ2|A0A3Q0IPJ2_DIACI	S	APSPS(+79.97)VETPIEPSLTSVPTAAK	5	22	LOW QUALITY PROTEIN: obscurin-like OS=Diaphorina citri OX=121845 GN=LOC103507575 PE=3 SV=1	LOW QUALITY PROTEIN: obscurin-like	LOC103507575	67.95	2258.11	0.6	565	586	S5:Phosphorylation (STY):5.99	S569	TKAPSPSVETPIE	4193.93	1318.73	2055.69	22986.2	4519.68	4522.61	Quantified	GO:0005524(MF:ATP binding);GO:0005085(MF:guanyl-nucleotide exchange factor activity);GO:0004672(MF:protein kinase activity)				PF00621(RhoGEF domain);PF00069(Protein kinase domain);PF00041(Fibronectin type III domain);PF07679(Immunoglobulin I-set domain)
A0A3Q0IPJ2	A0A3Q0IPJ2|A0A3Q0IPJ2_DIACI	T	APSPSVET(+79.97)PIEPSLTSVPTAAK	8	22	LOW QUALITY PROTEIN: obscurin-like OS=Diaphorina citri OX=121845 GN=LOC103507575 PE=3 SV=1	LOW QUALITY PROTEIN: obscurin-like	LOC103507575	55.33	2258.11	-2	565	586	T8:Phosphorylation (STY):2.14	T572	PSPSVETPIEPSL	131.397	320.913	225.93	732.253	68.9353	763.163	Quantified	GO:0005524(MF:ATP binding);GO:0005085(MF:guanyl-nucleotide exchange factor activity);GO:0004672(MF:protein kinase activity)				PF00621(RhoGEF domain);PF00069(Protein kinase domain);PF00041(Fibronectin type III domain);PF07679(Immunoglobulin I-set domain)
A0A3Q0J8W1	A0A3Q0J8W1|A0A3Q0J8W1_DIACI	T	APST(+79.97)EM(+15.99)FIGPHEVFSR	4	16	Neurofilament heavy polypeptide-like OS=Diaphorina citri OX=121845 GN=LOC113470579 PE=4 SV=1	Neurofilament heavy polypeptide-like	LOC113470579	45.68	1899.82	1.9	346	361	T4:Phosphorylation (STY):0.00;M6:Oxidation (M):1000.00	T349	VKKAPSTEMFIGP	3966.94	7464.48	7813.95	6760.99	4596.79	5590.37	Quantified
A0A3Q0J8W1	A0A3Q0J8W1|A0A3Q0J8W1_DIACI	T	APST(+79.97)EMFIGPHEVFSR	4	16	Neurofilament heavy polypeptide-like OS=Diaphorina citri OX=121845 GN=LOC113470579 PE=4 SV=1	Neurofilament heavy polypeptide-like	LOC113470579	47.95	1883.83	-3	346	361	T4:Phosphorylation (STY):0.00	T349	VKKAPSTEMFIGP	14957.4	37744	47171.4	24977.9	8060.98	20366	Quantified
A0A1S3DUL4	A0A1S3DUL4|A0A1S3DUL4_DIACI	T	APT(+79.97)PIVHIK	3	9	Serine/arginine repetitive matrix protein 1 OS=Diaphorina citri OX=121845 GN=LOC103524597 PE=4 SV=1	Serine/arginine repetitive matrix protein 1	LOC103524597	54.83	1054.56	-2.2	246	254		T248	KQARAPTPIVHIK	4491.64	4762.36	5399.54	6974.81	2270.62	4635.23	Quantified					PF15692(NF-kappa-B-activating protein)
A0A3Q0J0Q6	A0A3Q0J0Q6|A0A3Q0J0Q6_DIACI	S	APTFLPLS(+79.97)NSSPAR	8	14	Uncharacterized protein PB18E9.04c-like OS=Diaphorina citri OX=121845 GN=LOC103512922 PE=4 SV=1	Uncharacterized protein PB18E9.04c-like	LOC103512922	27.61	1536.73	-0.9	589	602	S8:Phosphorylation (STY):0.00	S596	PTFLPLSNSSPAR	437.23	110.078	831.073	352.749	634.16	581.918	Quantified
A0A1S4E9B2	A0A1S4E9B2|A0A1S4E9B2_DIACI	T	APVQVFGT(+79.97)DGR	8	11	ATP synthase subunit O, mitochondrial OS=Diaphorina citri OX=121845 GN=LOC103507387 PE=3 SV=1	ATP synthase subunit O, mitochondrial	LOC103507387	62.26	1225.55	-1.5	23	33		T30	PVQVFGTDGRYAT	597.898	521.791	696.465	887.656	712.759	654.082	Quantified	GO:0015986(BP:ATP synthesis coupled proton transport);GO:0046933(MF:proton-transporting ATP synthase activity, rotational mechanism)	K02137(NA)	ko00190(Oxidative phosphorylation)	Mitochondrion inner membrane	PF00213(ATP synthase delta (OSCP) subunit)
A0A1S3DGB8	A0A1S3DGB8|A0A1S3DGB8_DIACI:A0A1S3DG36|A0A1S3DG36_DIACI	S	AQAVAS(+79.97)PFELSSEHDLNYVIK	6	21	PDZ and LIM domain protein 3 isoform X2 OS=Diaphorina citri OX=121845 GN=LOC103517780 PE=4 SV=1	PDZ and LIM domain protein 3 isoform X2	LOC103517780	60.71	2397.13	1.2	146	166	S6:Phosphorylation (STY):28.79	S151	RAQAVASPFELSS	44150.4	52849.4	35496.5	717.729	8515.49	9769.53	Quantified					PF00595(PDZ domain (Also known as DHR or GLGF));PF15936(Domain of unknown function (DUF4749))
A0A1S3DGB8	A0A1S3DGB8|A0A1S3DGB8_DIACI:A0A1S3DG36|A0A1S3DG36_DIACI	S	AQAVASPFELS(+79.97)SEHDLNYVIK	11	21	PDZ and LIM domain protein 3 isoform X2 OS=Diaphorina citri OX=121845 GN=LOC103517780 PE=4 SV=1	PDZ and LIM domain protein 3 isoform X2	LOC103517780	50.43	2397.13	-1.2	146	166	S11:Phosphorylation (STY):0.00	S156	ASPFELSSEHDLN	2775.15	1180.11	2182.95	365.219	2813.14	479.297	Quantified					PF00595(PDZ domain (Also known as DHR or GLGF));PF15936(Domain of unknown function (DUF4749))
A0A1S3DGB8	A0A1S3DGB8|A0A1S3DGB8_DIACI:A0A1S3DG36|A0A1S3DG36_DIACI	S	AQAVASPFELSS(+79.97)EHDLNYVIK	12	21	PDZ and LIM domain protein 3 isoform X2 OS=Diaphorina citri OX=121845 GN=LOC103517780 PE=4 SV=1	PDZ and LIM domain protein 3 isoform X2	LOC103517780	51.26	2397.13	0.2	146	166	S12:Phosphorylation (STY):14.02	S157	SPFELSSEHDLNY	3226.31	325.004	1394.57	605.002	4026.91	1799.77	Quantified					PF00595(PDZ domain (Also known as DHR or GLGF));PF15936(Domain of unknown function (DUF4749))
A0A1S3DGB8	A0A1S3DGB8|A0A1S3DGB8_DIACI:A0A1S3DG36|A0A1S3DG36_DIACI	Y	AQAVASPFELSSEHDLNY(+79.97)VIK	18	21	PDZ and LIM domain protein 3 isoform X2 OS=Diaphorina citri OX=121845 GN=LOC103517780 PE=4 SV=1	PDZ and LIM domain protein 3 isoform X2	LOC103517780	45.43	2397.13	-1.9	146	166	Y18:Phosphorylation (STY):0.00	Y163	SEHDLNYVIKEQP	3226.31	1180.11	1720.59	689.931	4026.91	1799.77	Quantified					PF00595(PDZ domain (Also known as DHR or GLGF));PF15936(Domain of unknown function (DUF4749))
A0A3Q0IHS2	A0A3Q0IHS2|A0A3Q0IHS2_DIACI:A0A3Q0JIL8|A0A3Q0JIL8_DIACI	S	AQDNVS(+79.97)SLPR	6	10	WD repeat-containing protein 44 OS=Diaphorina citri OX=121845 GN=LOC103524571 PE=4 SV=1	WD repeat-containing protein 44	LOC103524571	42.66	1165.51	-3.9	182	191	S6:Phosphorylation (STY):0.00	S187	KAQDNVSSLPRIF	996.231	734.132	143.824	2624.25	1497.57	540.535	Quantified					PF00400(WD domain, G-beta repeat)
A0A3Q0IHS2	A0A3Q0IHS2|A0A3Q0IHS2_DIACI:A0A3Q0JIL8|A0A3Q0JIL8_DIACI	S	AQDNVSS(+79.97)LPR	7	10	WD repeat-containing protein 44 OS=Diaphorina citri OX=121845 GN=LOC103524571 PE=4 SV=1	WD repeat-containing protein 44	LOC103524571	44.63	1165.51	-17.8	182	191	S7:Phosphorylation (STY):20.00	S188	AQDNVSSLPRIFH	234.414	734.132	226.516	515.917	135.231	234.027	Quantified					PF00400(WD domain, G-beta repeat)
A0A3Q0IYW7	A0A3Q0IYW7|A0A3Q0IYW7_DIACI	S	AQDTITLS(+79.97)S(+79.97)DEELIR	8	15	ATP-dependent helicase ATRX OS=Diaphorina citri OX=121845 GN=LOC103512045 PE=3 SV=1	ATP-dependent helicase ATRX	LOC103512045	40.61	1849.77	7.2	1204	1218	S8:Phosphorylation (STY):22.85;S9:Phosphorylation (STY):19.05	S1211	QDTITLSSDEELI	2331.56	1877.76	915.145	1423.34	3673.57	5004.74	Quantified	GO:0005524(MF:ATP binding);GO:0046872(MF:metal ion binding)	K10779(NA)	ko04110(Cell cycle)	Chromosome;telomere;Nucleus	PF00271(Helicase conserved C-terminal domain);PF00176(SNF2 family N-terminal domain)
A0A3Q0IYW7	A0A3Q0IYW7|A0A3Q0IYW7_DIACI	S	AQDTITLS(+79.97)S(+79.97)DEELIR	9	15	ATP-dependent helicase ATRX OS=Diaphorina citri OX=121845 GN=LOC103512045 PE=3 SV=1	ATP-dependent helicase ATRX	LOC103512045	40.61	1849.77	7.2	1204	1218	S8:Phosphorylation (STY):22.85;S9:Phosphorylation (STY):19.05	S1212	DTITLSSDEELIR	2331.56	1877.76	915.145	1423.34	3673.57	5004.74	Quantified	GO:0005524(MF:ATP binding);GO:0046872(MF:metal ion binding)	K10779(NA)	ko04110(Cell cycle)	Chromosome;telomere;Nucleus	PF00271(Helicase conserved C-terminal domain);PF00176(SNF2 family N-terminal domain)
A0A3Q0JBV5	A0A3Q0JBV5|A0A3Q0JBV5_DIACI	S	AQEEGFS(+79.97)DEDFDEEPLPPK	7	19	Muscle M-line assembly protein unc-89-like OS=Diaphorina citri OX=121845 GN=LOC103515826 PE=4 SV=1	Muscle M-line assembly protein unc-89-like	LOC103515826	62.78	2257.89	-0.4	293	311		S299	AQEEGFSDEDFDE	8089.86	7886.09	6377.66	1822.01	1239.05	2546.69	Quantified
A0A3Q0IPJ2	A0A3Q0IPJ2|A0A3Q0IPJ2_DIACI	S	AQLEAS(+79.97)PLAQLR	6	12	LOW QUALITY PROTEIN: obscurin-like OS=Diaphorina citri OX=121845 GN=LOC103507575 PE=3 SV=1	LOW QUALITY PROTEIN: obscurin-like	LOC103507575	49.78	1375.69	4.5	3892	3903		S3897	RAQLEASPLAQLR	210.564	109.52	175.438	119.546	167.493	194.6	Quantified	GO:0005524(MF:ATP binding);GO:0005085(MF:guanyl-nucleotide exchange factor activity);GO:0004672(MF:protein kinase activity)				PF00621(RhoGEF domain);PF00069(Protein kinase domain);PF00041(Fibronectin type III domain);PF07679(Immunoglobulin I-set domain)
A0A3Q0IZQ4	A0A3Q0IZQ4|A0A3Q0IZQ4_DIACI	S	AQLELS(+79.97)QVR	6	9	Myosin heavy chain, muscle-like OS=Diaphorina citri OX=121845 GN=LOC103512418 PE=3 SV=1	Myosin heavy chain, muscle-like	LOC103512418	49.61	1122.54	-3.8	867	875		S872	RAQLELSQVRQEI	29765.8	20665.5	30609.6	25092.8	32003.6	16826.2	Quantified	GO:0016459(CC:myosin complex);GO:0003779(MF:actin binding);GO:0005524(MF:ATP binding);GO:0003774(MF:motor activity)				PF00063(Myosin head (motor domain));PF01576(Myosin tail)
A0A3Q0J267	A0A3Q0J267|A0A3Q0J267_DIACI	S	AQNPRS(+79.97)S(+79.97)EDNFEDEVER	6	17	LOW QUALITY PROTEIN: transcription factor 25 OS=Diaphorina citri OX=121845 GN=LOC103511167 PE=3 SV=1	LOW QUALITY PROTEIN: transcription factor 25	LOC103511167	38.57	2180.8	-4	102	118		S107	KAQNPRSSEDNFE	163.019			219.026	209.265	266.02	Quantified					PF04910(Transcriptional repressor TCF25)
A0A3Q0J267	A0A3Q0J267|A0A3Q0J267_DIACI	S	AQNPRS(+79.97)S(+79.97)EDNFEDEVER	7	17	LOW QUALITY PROTEIN: transcription factor 25 OS=Diaphorina citri OX=121845 GN=LOC103511167 PE=3 SV=1	LOW QUALITY PROTEIN: transcription factor 25	LOC103511167	38.57	2180.8	-4	102	118		S108	AQNPRSSEDNFED	163.019			219.026	209.265	266.02	Quantified					PF04910(Transcriptional repressor TCF25)
A0A1S3CXZ9	A0A1S3CXZ9|A0A1S3CXZ9_DIACI	S	AQS(+79.97)DENLNVFNNPVWLAAQK	3	20	GATA zinc finger domain-containing protein 14-like OS=Diaphorina citri OX=121845 GN=LOC103507461 PE=4 SV=2	GATA zinc finger domain-containing protein 14-like	LOC103507461	53.8	2337.08	0.9	459	478		S461	FNLKAQSDENLNV	1269.75	2216.08	1710.84	118.555	967.745	757.245	Quantified
A0A3Q0J2R9	A0A3Q0J2R9|A0A3Q0J2R9_DIACI:A0A1S3D4R1|A0A1S3D4R1_DIACI	S	AQS(+79.97)ELSSASSETAK	3	14	ATP synthase subunit delta, mitochondrial isoform X2 OS=Diaphorina citri OX=121845 GN=LOC103511460 PE=3 SV=1	ATP synthase subunit delta, mitochondrial isoform X2	LOC103511460	59.37	1474.62	1.7	173	186	S3:Phosphorylation (STY):28.64	S175	VLSKAQSELSSAS	948.857	993.956	941.691	1717.35	2222.12	1073.81	Quantified	GO:0015986(BP:ATP synthesis coupled proton transport);GO:0045261(CC:proton-transporting ATP synthase complex, catalytic core F(1));GO:0046933(MF:proton-transporting ATP synthase activity, rotational mechanism)	K02134(NA)	ko00190(Oxidative phosphorylation)		PF02823(ATP synthase, Delta/Epsilon chain, beta-sandwich domain)
A0A3Q0IR07	A0A3Q0IR07|A0A3Q0IR07_DIACI:A0A3Q0IR16|A0A3Q0IR16_DIACI:A0A3Q0IR26|A0A3Q0IR26_DIACI	S	AQS(+79.97)HLS(+79.97)QAKDDFFER	3	15	Uncharacterized protein LOC103508110 isoform X1 OS=Diaphorina citri OX=121845 GN=LOC103508110 PE=4 SV=1	Uncharacterized protein LOC103508110 isoform X1	LOC103508110	59.49	1937.77	-5.8	124	138		S126	DMERAQSHLSQAK	32802.1	43515.7	46338.4	23157.4	35214.1	33200.2	Quantified
A0A3Q0IR07	A0A3Q0IR07|A0A3Q0IR07_DIACI:A0A3Q0IR16|A0A3Q0IR16_DIACI:A0A3Q0IR26|A0A3Q0IR26_DIACI	S	AQS(+79.97)HLS(+79.97)QAKDDFFER	6	15	Uncharacterized protein LOC103508110 isoform X1 OS=Diaphorina citri OX=121845 GN=LOC103508110 PE=4 SV=1	Uncharacterized protein LOC103508110 isoform X1	LOC103508110	59.49	1937.77	-5.8	124	138		S129	RAQSHLSQAKDDF	32802.1	43515.7	46338.4	23157.4	35214.1	33200.2	Quantified
A0A3Q0IR07	A0A3Q0IR07|A0A3Q0IR07_DIACI:A0A3Q0IR16|A0A3Q0IR16_DIACI:A0A3Q0IR26|A0A3Q0IR26_DIACI	S	AQS(+79.97)HLSQAK	3	9	Uncharacterized protein LOC103508110 isoform X1 OS=Diaphorina citri OX=121845 GN=LOC103508110 PE=4 SV=1	Uncharacterized protein LOC103508110 isoform X1	LOC103508110	65.05	1048.47	0	124	132	S3:Phosphorylation (STY):64.77	S126	DMERAQSHLSQAK			15467.7		16793.3	20310.6	Quantified
A0A3Q0IR07	A0A3Q0IR07|A0A3Q0IR07_DIACI:A0A3Q0IR16|A0A3Q0IR16_DIACI:A0A3Q0IR26|A0A3Q0IR26_DIACI	S	AQS(+79.97)HLSQAKDDFFER	3	15	Uncharacterized protein LOC103508110 isoform X1 OS=Diaphorina citri OX=121845 GN=LOC103508110 PE=4 SV=1	Uncharacterized protein LOC103508110 isoform X1	LOC103508110	29.19	1857.8	-2.6	124	138	S3:Phosphorylation (STY):0.00	S126	DMERAQSHLSQAK	6830.03	3324.36	6152.11	874.95	1320.73	5581.94	Quantified
A0A1S3D0Q7	A0A1S3D0Q7|A0A1S3D0Q7_DIACI	S	AQS(+79.97)PALVGLAFR	3	12	Elongin-B OS=Diaphorina citri OX=121845 GN=LOC103509001 PE=4 SV=1	Elongin-B	LOC103509001	70.11	1308.66	-2	80	91		S82	AVAKAQSPALVGL	4495.13	5109.9	2820.31	285.649	3433.61	1987.5	Quantified	GO:0006368(BP:transcription elongation from RNA polymerase II promoter);GO:0070449(CC:elongin complex);GO:0030891(CC:VCB complex)	K03873(NA)	ko04066(HIF-1 signaling pathway);ko04120(Ubiquitin mediated proteolysis)
A0A1S3CY38	A0A1S3CY38|A0A1S3CY38_DIACI	S	AQS(+79.97)PIFPDK	3	9	Uncharacterized protein LOC103506763 OS=Diaphorina citri OX=121845 GN=LOC103506763 PE=4 SV=1	Uncharacterized protein LOC103506763	LOC103506763	28.99	1081.48	-1.9	178	186		S180	RKRKAQSPIFPDK	157.304			178.39	157.07	140.201	Quantified
A0A1S3CY38	A0A1S3CY38|A0A1S3CY38_DIACI	S	AQS(+79.97)PIFPDKEVIK	3	13	Uncharacterized protein LOC103506763 OS=Diaphorina citri OX=121845 GN=LOC103506763 PE=4 SV=1	Uncharacterized protein LOC103506763	LOC103506763	33.76	1550.77	13.8	178	190		S180	RKRKAQSPIFPDK	1294.24	2620.1	3954.62	433.563	941.541	1943.57	Quantified
A0A3Q0JET8	A0A3Q0JET8|A0A3Q0JET8_DIACI	S	AQS(+79.97)YAGQSFK	3	10	Transporter OS=Diaphorina citri OX=121845 GN=LOC103519733 PE=3 SV=1	Transporter	LOC103519733	54.02	1165.48	-2.2	43	52	S3:Phosphorylation (STY):33.98	S45	GGMKAQSYAGQSF	488.916	293.415	371.475	203.894	476.86	346.335	Quantified	GO:0016021(CC:integral component of membrane);GO:0005328(MF:neurotransmitter:sodium symporter activity)			Membrane;Multi-pass membrane protein	PF00209(Sodium:neurotransmitter symporter family)
A0A1S3CZD9	A0A1S3CZD9|A0A1S3CZD9_DIACI	S	AQSDAPKPEKPFTTPEPSAPEEES(+79.97)EES(+79.97)D	24	28	STI1 domain-containing protein OS=Diaphorina citri OX=121845 GN=LOC103507510 PE=3 SV=1	STI1 domain-containing protein	LOC103507510	53.93	3188.26	2.5	51	78	S24:Phosphorylation (STY):28.13;S27:Phosphorylation (STY):34.08	S74	SAPEEESEESDPE	2900.14	1674.77	11307.8	709.491	4027.53	5773.48	Quantified	GO:0046983(MF:protein dimerization activity)				PF13414(TPR repeat)
A0A1S3CZD9	A0A1S3CZD9|A0A1S3CZD9_DIACI	S	AQSDAPKPEKPFTTPEPSAPEEES(+79.97)EES(+79.97)D	27	28	STI1 domain-containing protein OS=Diaphorina citri OX=121845 GN=LOC103507510 PE=3 SV=1	STI1 domain-containing protein	LOC103507510	53.93	3188.26	2.5	51	78	S24:Phosphorylation (STY):28.13;S27:Phosphorylation (STY):34.08	S77	EEESEESDPELDN	2900.14	1674.77	11307.8	709.491	4027.53	5773.48	Quantified	GO:0046983(MF:protein dimerization activity)				PF13414(TPR repeat)
A0A3Q0J2R9	A0A3Q0J2R9|A0A3Q0J2R9_DIACI:A0A1S3D4R1|A0A1S3D4R1_DIACI	S	AQSELSSAS(+79.97)SETAK	9	14	ATP synthase subunit delta, mitochondrial isoform X2 OS=Diaphorina citri OX=121845 GN=LOC103511460 PE=3 SV=1	ATP synthase subunit delta, mitochondrial isoform X2	LOC103511460	54.85	1474.62	1.8	173	186	S9:Phosphorylation (STY):0.00	S181	SELSSASSETAKA	81.8842			123.835	880.179		Quantified	GO:0015986(BP:ATP synthesis coupled proton transport);GO:0045261(CC:proton-transporting ATP synthase complex, catalytic core F(1));GO:0046933(MF:proton-transporting ATP synthase activity, rotational mechanism)	K02134(NA)	ko00190(Oxidative phosphorylation)		PF02823(ATP synthase, Delta/Epsilon chain, beta-sandwich domain)
A0A3Q0IR07	A0A3Q0IR07|A0A3Q0IR07_DIACI:A0A3Q0IR16|A0A3Q0IR16_DIACI:A0A3Q0IR26|A0A3Q0IR26_DIACI	S	AQSHLS(+79.97)QAKDDFFER	6	15	Uncharacterized protein LOC103508110 isoform X1 OS=Diaphorina citri OX=121845 GN=LOC103508110 PE=4 SV=1	Uncharacterized protein LOC103508110 isoform X1	LOC103508110	52.61	1857.8	-2.6	124	138	S6:Phosphorylation (STY):12.16	S129	RAQSHLSQAKDDF	11079.9	25568.2	18216.1	10527.7	26897.6	19621.2	Quantified
A0A3Q0JJD8	A0A3Q0JJD8|A0A3Q0JJD8_DIACI:A0A3Q0JMT7|A0A3Q0JMT7_DIACI	S	AQVIDGIIYGGLPNQS(+79.97)PNTQR	16	21	Uncharacterized protein LOC103522663 OS=Diaphorina citri OX=121845 GN=LOC103522663 PE=4 SV=1	Uncharacterized protein LOC103522663	LOC103522663	46.82	2320.12	2	491	511	S16:Phosphorylation (STY):14.84	S506	GGLPNQSPNTQRR	860.464	503.316	158.865	243.994	315.84	354.276	Quantified					PF01302(CAP-Gly domain)
A0A1S3D9R3	A0A1S3D9R3|A0A1S3D9R3_DIACI	S	AQVS(+79.97)SLVNLYTNR	4	13	Major antigen-like OS=Diaphorina citri OX=121845 GN=LOC103514257 PE=4 SV=1	Major antigen-like	LOC103514257	54.21	1543.74	0.1	354	366	S4:Phosphorylation (STY):0.00	S357	VLKAQVSSLVNLY	1619.75	1916.22	2422.54	454.158	538.427	212.708	Quantified
A0A1S4EDD2	A0A1S4EDD2|A0A1S4EDD2_DIACI	S	AQYS(+79.97)NEVDALK	4	11	Uncharacterized protein LOC103510523 OS=Diaphorina citri OX=121845 GN=LOC103510523 PE=4 SV=2	Uncharacterized protein LOC103510523	LOC103510523	60.1	1316.56	-1.2	346	356	S4:Phosphorylation (STY):27.96	S349	AIRAQYSNEVDAL	2772.75	1135	1088.24	4925.47	1069.31	366.034	Quantified
A0A1S4EDD2	A0A1S4EDD2|A0A1S4EDD2_DIACI	S	AQYS(+79.97)NEVDALKK	4	12	Uncharacterized protein LOC103510523 OS=Diaphorina citri OX=121845 GN=LOC103510523 PE=4 SV=2	Uncharacterized protein LOC103510523	LOC103510523	62.19	1444.66	0.2	346	357	S4:Phosphorylation (STY):26.02	S349	AIRAQYSNEVDAL	17843.8	23376.1	12978.3	19742.6	14610.7	16391.4	Quantified
A0A1S3CZN2	A0A1S3CZN2|A0A1S3CZN2_DIACI	S	ARLINS(+79.97)NPEK	6	10	MAGUK p55 subfamily member 6-like OS=Diaphorina citri OX=121845 GN=LOC103507636 PE=4 SV=1	MAGUK p55 subfamily member 6-like	LOC103507636	27.1	1220.59	-4.5	57	66		S62	KARLINSNPEKFA	2184.26	2150.24	2840.22	1640.52	5584.07	151.241	Quantified					PF00625(Guanylate kinase)
A0A1S3DFT6	A0A1S3DFT6|A0A1S3DFT6_DIACI	T	ARPIPPPPPT(+79.97)PPPDPPLNGVNVR	10	23	Epidermal growth factor receptor kinase substrate 8 OS=Diaphorina citri OX=121845 GN=LOC103517601 PE=3 SV=1	Epidermal growth factor receptor kinase substrate 8	LOC103517601	65.59	2474.28	-1.5	164	186		T173	IPPPPPTPPPDPP	590.621	3109.94	2034.77	4192.4	1589.16	7030.62	Quantified	GO:0016301(MF:kinase activity)				PF08416(Phosphotyrosine-binding domain)
A0A1S4EC47	A0A1S4EC47|A0A1S4EC47_DIACI	S	ARQEDS(+79.97)VNEMHDVLVNFDR	6	19	Uncharacterized protein LOC103509380 OS=Diaphorina citri OX=121845 GN=LOC103509380 PE=4 SV=1	Uncharacterized protein LOC103509380	LOC103509380	31.14	2353.02	-0.5	315	333		S320	RARQEDSVNEMHD	865.551	295.193	1786.83	839.32	1469.73	567.845	Quantified	GO:0003676(MF:nucleic acid binding)			Nucleus
A0A3Q0IT84	A0A3Q0IT84|A0A3Q0IT84_DIACI	S	ARS(+79.97)VNFPSR	3	9	Golgin subfamily A member 2 OS=Diaphorina citri OX=121845 GN=LOC113467471 PE=4 SV=1	Golgin subfamily A member 2	LOC113467471	33.42	1112.51	-1.6	317	325	S3:Phosphorylation (STY):29.85	S319	YMSRARSVNFPSR	1818.05	3054.42	4117.23	1426.91	1662.98	201.23	Quantified
A0A3Q0IYV6	A0A3Q0IYV6|A0A3Q0IYV6_DIACI	S	AS(+79.97)AES(+79.97)LEKEK	2	10	Titin homolog OS=Diaphorina citri OX=121845 GN=LOC103509514 PE=4 SV=1	Titin homolog	LOC103509514	27.89	1250.48	-0.9	674	683		S675	SQSKRASAESLEK	1012.87	684.432	916.829	1277.86	1790.92	748.459	Quantified	GO:0005856(CC:cytoskeleton);GO:0003779(MF:actin binding);GO:0005198(MF:structural molecule activity)				PF05902(4.1 protein C-terminal domain (CTD));PF09379(FERM N-terminal domain)
A0A3Q0IYV6	A0A3Q0IYV6|A0A3Q0IYV6_DIACI	S	AS(+79.97)AES(+79.97)LEKEK	5	10	Titin homolog OS=Diaphorina citri OX=121845 GN=LOC103509514 PE=4 SV=1	Titin homolog	LOC103509514	27.89	1250.48	-0.9	674	683		S678	KRASAESLEKEKI	1012.87	684.432	916.829	1277.86	1790.92	748.459	Quantified	GO:0005856(CC:cytoskeleton);GO:0003779(MF:actin binding);GO:0005198(MF:structural molecule activity)				PF05902(4.1 protein C-terminal domain (CTD));PF09379(FERM N-terminal domain)
A0A3Q0IL42	A0A3Q0IL42|A0A3Q0IL42_DIACI	S	AS(+79.97)AITSPPQENVEVK	2	15	Ankyrin-3-like OS=Diaphorina citri OX=121845 GN=LOC103505993 PE=4 SV=1	Ankyrin-3-like	LOC103505993	48.78	1648.77	0.4	1656	1670	S2:Phosphorylation (STY):0.00	S1657	QEEKKASAITSPP	2552.78	97.8482	170.356	1698.1	3635.76	2060.73	Quantified	GO:0007165(BP:signal transduction)			Cytoplasm;cytoskeleton;Membrane	PF00531(Death domain);PF00791(ZU5 domain);PF12796(Ankyrin repeats (3 copies));PF00023(Ankyrin repeat);PF13857(Ankyrin repeats (many copies))
A0A3Q0IPJ2	A0A3Q0IPJ2|A0A3Q0IPJ2_DIACI	S	AS(+79.97)ALDEEDSSATR	2	13	LOW QUALITY PROTEIN: obscurin-like OS=Diaphorina citri OX=121845 GN=LOC103507575 PE=3 SV=1	LOW QUALITY PROTEIN: obscurin-like	LOC103507575	53.03	1430.56	-1.3	751	763	S2:Phosphorylation (STY):52.22	S752	VRTKRASALDEED	176.247	298.161	311.981	3050.83	2777.31	86.6926	Quantified	GO:0005524(MF:ATP binding);GO:0005085(MF:guanyl-nucleotide exchange factor activity);GO:0004672(MF:protein kinase activity)				PF00621(RhoGEF domain);PF00069(Protein kinase domain);PF00041(Fibronectin type III domain);PF07679(Immunoglobulin I-set domain)
A0A3Q0IZK0	A0A3Q0IZK0|A0A3Q0IZK0_DIACI	S	AS(+79.97)DASDVIIAR	2	11	LOW QUALITY PROTEIN: twitchin-like OS=Diaphorina citri OX=121845 GN=LOC103512392 PE=4 SV=1	LOW QUALITY PROTEIN: twitchin-like	LOC103512392	62.46	1196.54	-4.3	5910	5920	S2:Phosphorylation (STY):45.70	S5911	AGTGRASDASDVI	354.841	457.301	992.38	1020.54	1815.49	1692.48	Quantified					PF07679(Immunoglobulin I-set domain);PF00041(Fibronectin type III domain)
A0A3Q0ILN7	A0A3Q0ILN7|A0A3Q0ILN7_DIACI	S	AS(+79.97)DDTFNATGLPNDK	2	15	Uncharacterized protein LOC103506185 OS=Diaphorina citri OX=121845 GN=LOC103506185 PE=4 SV=1	Uncharacterized protein LOC103506185	LOC103506185	71.53	1644.67	1.2	97	111	S2:Phosphorylation (STY):41.20	S98	LYNGRASDDTFNA	46097.5	59988.4	65565.6	1181.15	15112.9	16927.1	Quantified
A0A1S4ED67	A0A1S4ED67|A0A1S4ED67_DIACI	S	AS(+79.97)DITYGVTT(+79.97)KEER	2	14	Leucine-rich repeat-containing protein DDB_G0290503 OS=Diaphorina citri OX=121845 GN=LOC108252562 PE=4 SV=1	Leucine-rich repeat-containing protein DDB_G0290503	LOC108252562	40.24	1728.7	-0.3	422	435	S2:Phosphorylation (STY):5.77;T10:Phosphorylation (STY):0.00	S423	EKVSRASDITYGV	7905.03	7504.37	5433.36	20163.7	4802.86	8341.35	Quantified
A0A1S4ED67	A0A1S4ED67|A0A1S4ED67_DIACI	T	AS(+79.97)DITYGVTT(+79.97)KEER	10	14	Leucine-rich repeat-containing protein DDB_G0290503 OS=Diaphorina citri OX=121845 GN=LOC108252562 PE=4 SV=1	Leucine-rich repeat-containing protein DDB_G0290503	LOC108252562	40.24	1728.7	-0.3	422	435	S2:Phosphorylation (STY):5.77;T10:Phosphorylation (STY):0.00	T431	ITYGVTTKEERRR	7905.03	7504.37	5433.36	20163.7	4802.86	8341.35	Quantified
A0A1S4ED67	A0A1S4ED67|A0A1S4ED67_DIACI	S	AS(+79.97)DITYGVTTK	2	11	Leucine-rich repeat-containing protein DDB_G0290503 OS=Diaphorina citri OX=121845 GN=LOC108252562 PE=4 SV=1	Leucine-rich repeat-containing protein DDB_G0290503	LOC108252562	53.67	1234.55	-1.7	422	432	S2:Phosphorylation (STY):38.16	S423	EKVSRASDITYGV	5144.79	1558.57	2875.76	6481.57	4439.11	5629.85	Quantified
A0A1S3D7F8	A0A1S3D7F8|A0A1S3D7F8_DIACI	S	AS(+79.97)EGHLNLQM(+15.99)GYNK	2	14	Calponin OS=Diaphorina citri OX=121845 GN=LOC103513027 PE=3 SV=1	Calponin	LOC103513027	27.98	1656.7	3.6	140	153	S2:Phosphorylation (STY):21.51;M10:Oxidation (M):1000.00	S141	EEQLRASEGHLNL	591.948	746.938	647.795	680.84	404.116	538.435	Quantified	GO:0031032(BP:actomyosin structure organization);GO:0003779(MF:actin binding);GO:0005516(MF:calmodulin binding)				PF00402(Calponin family repeat);PF00307(Calponin homology (CH) domain)
A0A1S3D7F8	A0A1S3D7F8|A0A1S3D7F8_DIACI	S	AS(+79.97)EGHLNLQMGYNK	2	14	Calponin OS=Diaphorina citri OX=121845 GN=LOC103513027 PE=3 SV=1	Calponin	LOC103513027	60.82	1640.7	6.2	140	153	S2:Phosphorylation (STY):52.32	S141	EEQLRASEGHLNL	5578.61	8813.84	6995.57	3243.07	1872.34	2122.74	Quantified	GO:0031032(BP:actomyosin structure organization);GO:0003779(MF:actin binding);GO:0005516(MF:calmodulin binding)				PF00402(Calponin family repeat);PF00307(Calponin homology (CH) domain)
A0A3Q0IHQ6	A0A3Q0IHQ6|A0A3Q0IHQ6_DIACI	S	AS(+79.97)FSDLVSSR	2	10	Facilitated trehalose transporter Tret1-1-like OS=Diaphorina citri OX=121845 GN=LOC103524474 PE=4 SV=1	Facilitated trehalose transporter Tret1-1-like	LOC103524474	46.4	1147.49	3.6	89	98	S2:Phosphorylation (STY):18.53	S90	AARKKASFSDLVS	273.249	51.7779	234.505	461.205	400.082	111.185	Quantified	GO:0016021(CC:integral component of membrane);GO:0022857(MF:transmembrane transporter activity)				PF00083(Sugar (and other) transporter)
A0A1S3D2M8	A0A1S3D2M8|A0A1S3D2M8_DIACI	S	AS(+79.97)GDVVQGPGPSGAASTAEGK	2	21	Uncharacterized protein LOC103509313 OS=Diaphorina citri OX=121845 GN=LOC103509313 PE=4 SV=1	Uncharacterized protein LOC103509313	LOC103509313	24.92	1921.84	2.5	336	356	S2:Phosphorylation (STY):16.78	S337	PRESKASGDVVQG	440.69	548.884	438.821	201.242	185.163	333.629	Quantified
A0A3Q0J7Z6	A0A3Q0J7Z6|A0A3Q0J7Z6_DIACI	S	AS(+79.97)GGSEGQYS(+79.97)PPHSPVR	2	17	protein-serine/threonine phosphatase OS=Diaphorina citri OX=121845 GN=LOC103514310 PE=4 SV=1	protein-serine/threonine phosphatase	LOC103514310	39.18	1871.72	3.2	112	128	S2:Phosphorylation (STY):0.00;S10:Phosphorylation (STY):12.28	S113	SNVSKASGGSEGQ	261.922	267.306	148.125	287.636	198.766	96.3205	Quantified	GO:0008420(MF:RNA polymerase II CTD heptapeptide repeat phosphatase activity)				PF03031(NLI interacting factor-like phosphatase)
A0A3Q0J7Z6	A0A3Q0J7Z6|A0A3Q0J7Z6_DIACI	S	AS(+79.97)GGSEGQYS(+79.97)PPHSPVR	10	17	protein-serine/threonine phosphatase OS=Diaphorina citri OX=121845 GN=LOC103514310 PE=4 SV=1	protein-serine/threonine phosphatase	LOC103514310	39.18	1871.72	3.2	112	128	S2:Phosphorylation (STY):0.00;S10:Phosphorylation (STY):12.28	S121	GSEGQYSPPHSPV	261.922	267.306	148.125	287.636	198.766	96.3205	Quantified	GO:0008420(MF:RNA polymerase II CTD heptapeptide repeat phosphatase activity)				PF03031(NLI interacting factor-like phosphatase)
A0A3Q0J148	A0A3Q0J148|A0A3Q0J148_DIACI	S	AS(+79.97)GSLFTTSVSK	2	12	Uncharacterized protein LOC113469006 OS=Diaphorina citri OX=121845 GN=LOC113469006 PE=4 SV=1	Uncharacterized protein LOC113469006	LOC113469006	45.85	1263.57	-7.5	99	110	S2:Phosphorylation (STY):5.03	S100	ANSSRASGSLFTT	423.42	1030.26	363.98	323.442	765.103	193.683	Quantified	GO:0016021(CC:integral component of membrane)
A0A1S3D1A8	A0A1S3D1A8|A0A1S3D1A8_DIACI	S	AS(+79.97)GVTVSDIC(+57.02)K	2	11	Cofilin/actin-depolymerizing factor homolog isoform X1 OS=Diaphorina citri OX=121845 GN=LOC103509384 PE=3 SV=2	Cofilin/actin-depolymerizing factor homolog isoform X1	LOC103509384	42.83	1215.52	2.9	2	12	S2:Phosphorylation (STY):28.36;C10:Carbamidomethylation:1000.00	S3	____MASGVTVSD	406.835	266.547	249.082	196.677	101.855	94.1888	Quantified	GO:0030042(BP:actin filament depolymerization);GO:0015629(CC:actin cytoskeleton);GO:0003779(MF:actin binding)	K05765(NA)	ko04810(Regulation of actin cytoskeleton)		PF00241(Cofilin/tropomyosin-type actin-binding protein)
A0A1S3D0C4	A0A1S3D0C4|A0A1S3D0C4_DIACI	S	AS(+79.97)IDAEVYER	2	10	Eukaryotic translation initiation factor 4B OS=Diaphorina citri OX=121845 GN=LOC103508743 PE=4 SV=1	Eukaryotic translation initiation factor 4B	LOC103508743	55.14	1231.51	-2.8	64	73	S2:Phosphorylation (STY):71.27	S65	PSAPRASIDAEVY	605.001	501.69	881.89	1051.89	1170.5	982.937	Quantified	GO:0097010(BP:eukaryotic translation initiation factor 4F complex assembly);GO:0033592(MF:RNA strand annealing activity);GO:0003743(MF:translation initiation factor activity)				PF00076(RNA recognition motif. (a.k.a. RRM, RBD, or RNP domain))
A0A3Q0IWV0	A0A3Q0IWV0|A0A3Q0IWV0_DIACI	S	AS(+79.97)ITNPEAPR	2	10	Protein stoned-B OS=Diaphorina citri OX=121845 GN=LOC103511042 PE=3 SV=1	Protein stoned-B	LOC103511042	38.56	1134.51	1	335	344	S2:Phosphorylation (STY):0.00	S336	PSSRKASITNPEA	33.7615	295.555	303.962	687.312	448.978	463.796	Quantified	GO:0006897(BP:endocytosis);GO:0006886(BP:intracellular protein transport);GO:0030100(BP:regulation of endocytosis);GO:0030131(CC:clathrin adaptor complex)			Cytoplasm	PF00928(Adaptor complexes medium subunit family)
A0A3Q0J9E1	A0A3Q0J9E1|A0A3Q0J9E1_DIACI	S	AS(+79.97)KT(+79.97)SVDVQIR	2	11	Uncharacterized protein LOC103517085 OS=Diaphorina citri OX=121845 GN=LOC103517085 PE=4 SV=1	Uncharacterized protein LOC103517085	LOC103517085	27.95	1362.59	-8	777	787	S2:Phosphorylation (STY):6.63;T4:Phosphorylation (STY):11.06	S778	STESRASKTSVDV	11531.4	4756.14	12200.4	8003.09	6164.97	5756.02	Quantified	GO:0005524(MF:ATP binding);GO:0004674(MF:protein serine/threonine kinase activity)				PF00069(Protein kinase domain);PF00054(Laminin G domain);PF12474(Polo kinase kinase)
A0A3Q0J9E1	A0A3Q0J9E1|A0A3Q0J9E1_DIACI	T	AS(+79.97)KT(+79.97)SVDVQIR	4	11	Uncharacterized protein LOC103517085 OS=Diaphorina citri OX=121845 GN=LOC103517085 PE=4 SV=1	Uncharacterized protein LOC103517085	LOC103517085	27.95	1362.59	-8	777	787	S2:Phosphorylation (STY):6.63;T4:Phosphorylation (STY):11.06	T780	ESRASKTSVDVQI	11531.4	4756.14	12200.4	8003.09	6164.97	5756.02	Quantified	GO:0005524(MF:ATP binding);GO:0004674(MF:protein serine/threonine kinase activity)				PF00069(Protein kinase domain);PF00054(Laminin G domain);PF12474(Polo kinase kinase)
A0A3Q0J9E1	A0A3Q0J9E1|A0A3Q0J9E1_DIACI	S	AS(+79.97)KTS(+79.97)VDVQIR	2	11	Uncharacterized protein LOC103517085 OS=Diaphorina citri OX=121845 GN=LOC103517085 PE=4 SV=1	Uncharacterized protein LOC103517085	LOC103517085	37.05	1362.59	-1.7	777	787	S2:Phosphorylation (STY):14.04;S5:Phosphorylation (STY):12.28	S778	STESRASKTSVDV	616.46	4202.25	12200.4	8003.09	6164.97	5087.2	Quantified	GO:0005524(MF:ATP binding);GO:0004674(MF:protein serine/threonine kinase activity)				PF00069(Protein kinase domain);PF00054(Laminin G domain);PF12474(Polo kinase kinase)
A0A3Q0J9E1	A0A3Q0J9E1|A0A3Q0J9E1_DIACI	S	AS(+79.97)KTS(+79.97)VDVQIR	5	11	Uncharacterized protein LOC103517085 OS=Diaphorina citri OX=121845 GN=LOC103517085 PE=4 SV=1	Uncharacterized protein LOC103517085	LOC103517085	37.05	1362.59	-1.7	777	787	S2:Phosphorylation (STY):14.04;S5:Phosphorylation (STY):12.28	S781	SRASKTSVDVQIR	616.46	4202.25	12200.4	8003.09	6164.97	5087.2	Quantified	GO:0005524(MF:ATP binding);GO:0004674(MF:protein serine/threonine kinase activity)				PF00069(Protein kinase domain);PF00054(Laminin G domain);PF12474(Polo kinase kinase)
A0A3Q0J9E1	A0A3Q0J9E1|A0A3Q0J9E1_DIACI	S	AS(+79.97)KTSVDVQIR	2	11	Uncharacterized protein LOC103517085 OS=Diaphorina citri OX=121845 GN=LOC103517085 PE=4 SV=1	Uncharacterized protein LOC103517085	LOC103517085	37.35	1282.63	-9.9	777	787	S2:Phosphorylation (STY):11.10	S778	STESRASKTSVDV	97.075	440.002	1253.57	652.552	166.203	76.6634	Quantified	GO:0005524(MF:ATP binding);GO:0004674(MF:protein serine/threonine kinase activity)				PF00069(Protein kinase domain);PF00054(Laminin G domain);PF12474(Polo kinase kinase)
A0A1S3DSQ8	A0A1S3DSQ8|A0A1S3DSQ8_DIACI	S	AS(+79.97)LGQIKPPR	2	10	Aquaporin-2-like OS=Diaphorina citri OX=121845 GN=LOC103524045 PE=3 SV=1	Aquaporin-2-like	LOC103524045	69.54	1145.6	-0.8	11	20		S12	KSSSKASLGQIKP	22956.5	34355.3	31510.9	22079.6	14041	13785.9	Quantified	GO:0016021(CC:integral component of membrane);GO:0015267(MF:channel activity)			Membrane;Multi-pass membrane protein	PF00230(Major intrinsic protein)
A0A1S3DTD7	A0A1S3DTD7|A0A1S3DTD7_DIACI:A0A1S3D123|A0A1S3D123_DIACI	S	AS(+79.97)LHTFGPASGR	2	12	Uncharacterized protein LOC103522568 OS=Diaphorina citri OX=121845 GN=LOC103523952 PE=4 SV=1	Uncharacterized protein LOC103522568	LOC103523952	62.41	1279.57	1.4	19	30	S2:Phosphorylation (STY):28.36	S20	FGGQKASLHTFGP	4637.31	3724.91	8867.07	134.565	711.452	1983.29	Quantified
A0A3Q0IIF7	A0A3Q0IIF7|A0A3Q0IIF7_DIACI	S	AS(+79.97)LNGDIDELK	2	11	LOW QUALITY PROTEIN: myosin-11-like OS=Diaphorina citri OX=121845 GN=LOC103524911 PE=4 SV=1	LOW QUALITY PROTEIN: myosin-11-like	LOC103524911	42.99	1253.55	-6.2	745	755		S746	LKKQRASLNGDID	727.408	137.835	137.327	1661.89	357.605	617.702	Quantified
A0A3Q0IIF7	A0A3Q0IIF7|A0A3Q0IIF7_DIACI	S	AS(+79.97)LNGDIDELKEK	2	13	LOW QUALITY PROTEIN: myosin-11-like OS=Diaphorina citri OX=121845 GN=LOC103524911 PE=4 SV=1	LOW QUALITY PROTEIN: myosin-11-like	LOC103524911	44.01	1510.69	0.2	745	757		S746	LKKQRASLNGDID	456.227	1962.97	1148.18	1476.57	1168.23	321.761	Quantified
A0A3Q0IN52	A0A3Q0IN52|A0A3Q0IN52_DIACI	S	AS(+79.97)LQLDTQNEAALQK	2	15	LOW QUALITY PROTEIN: titin OS=Diaphorina citri OX=121845 GN=LOC103524768 PE=4 SV=1	LOW QUALITY PROTEIN: titin	LOC103524768	45.53	1708.8	-5	1804	1818	S2:Phosphorylation (STY):2.87	S1805	FVESKASLQLDTQ	830.932	179.416	1385.18	807.086	1046.95	657.646	Quantified					PF07679(Immunoglobulin I-set domain);PF06582(Repeat of unknown function (DUF1136))
A0A3Q0IKV2	A0A3Q0IKV2|A0A3Q0IKV2_DIACI	S	AS(+79.97)LT(+79.97)SLRSNEVAGGAGGLPAGTEAAVER	2	28	Junctophilin-1 OS=Diaphorina citri OX=121845 GN=LOC103505743 PE=3 SV=1	Junctophilin-1	LOC103505743	46.19	2800.28	-0.2	195	222	S2:Phosphorylation (STY):7.77;T4:Phosphorylation (STY):0.00	S196	NKNLRASLTSLRS	219.284	1628.23	1941.66	2273.26	2028.25	2295.51	Quantified	GO:0030314(CC:junctional membrane complex)			Endoplasmic reticulum membrane;Single-pass type IV membrane protein;Membrane	PF02493(MORN repeat)
A0A3Q0IKV2	A0A3Q0IKV2|A0A3Q0IKV2_DIACI	T	AS(+79.97)LT(+79.97)SLRSNEVAGGAGGLPAGTEAAVER	4	28	Junctophilin-1 OS=Diaphorina citri OX=121845 GN=LOC103505743 PE=3 SV=1	Junctophilin-1	LOC103505743	46.19	2800.28	-0.2	195	222	S2:Phosphorylation (STY):7.77;T4:Phosphorylation (STY):0.00	T198	NLRASLTSLRSNE	219.284	1628.23	1941.66	2273.26	2028.25	2295.51	Quantified	GO:0030314(CC:junctional membrane complex)			Endoplasmic reticulum membrane;Single-pass type IV membrane protein;Membrane	PF02493(MORN repeat)
A0A3Q0IKV2	A0A3Q0IKV2|A0A3Q0IKV2_DIACI	S	AS(+79.97)LTSLRS(+79.97)NEVAGGAGGLPAGTEAAVER	2	28	Junctophilin-1 OS=Diaphorina citri OX=121845 GN=LOC103505743 PE=3 SV=1	Junctophilin-1	LOC103505743	34.53	2800.28	1.4	195	222	S2:Phosphorylation (STY):0.00;S8:Phosphorylation (STY):0.00	S196	NKNLRASLTSLRS	550.984	1159.06	370.082	347.628	1254.73	2295.51	Quantified	GO:0030314(CC:junctional membrane complex)			Endoplasmic reticulum membrane;Single-pass type IV membrane protein;Membrane	PF02493(MORN repeat)
A0A3Q0IKV2	A0A3Q0IKV2|A0A3Q0IKV2_DIACI	S	AS(+79.97)LTSLRS(+79.97)NEVAGGAGGLPAGTEAAVER	8	28	Junctophilin-1 OS=Diaphorina citri OX=121845 GN=LOC103505743 PE=3 SV=1	Junctophilin-1	LOC103505743	34.53	2800.28	1.4	195	222	S2:Phosphorylation (STY):0.00;S8:Phosphorylation (STY):0.00	S202	SLTSLRSNEVAGG	550.984	1159.06	370.082	347.628	1254.73	2295.51	Quantified	GO:0030314(CC:junctional membrane complex)			Endoplasmic reticulum membrane;Single-pass type IV membrane protein;Membrane	PF02493(MORN repeat)
A0A1S3CY38	A0A1S3CY38|A0A1S3CY38_DIACI	S	AS(+79.97)PALEITPDVSISK	2	15	Uncharacterized protein LOC103506763 OS=Diaphorina citri OX=121845 GN=LOC103506763 PE=4 SV=1	Uncharacterized protein LOC103506763	LOC103506763	60.08	1606.79	1.8	1661	1675	S2:Phosphorylation (STY):71.75	S1662	SKRLRASPALEIT	436.756	355.769	118.295	645.775	171.57	409.583	Quantified
A0A3Q0JCW2	A0A3Q0JCW2|A0A3Q0JCW2_DIACI	S	AS(+79.97)PAPLSQEPLK	2	12	WD repeat-containing protein 7 OS=Diaphorina citri OX=121845 GN=LOC103518742 PE=4 SV=1	WD repeat-containing protein 7	LOC103518742	62.18	1316.64	-2.9	364	375	S2:Phosphorylation (STY):81.69	S365	LASLRASPAPLSQ	656.51	2185.81	2375.49	4146.19	2796.62	2857.25	Quantified					PF00400(WD domain, G-beta repeat)
A0A3Q0JC38	A0A3Q0JC38|A0A3Q0JC38_DIACI	S	AS(+79.97)PEEEDLTLPDR	2	13	Uncharacterized protein LOC103516252 OS=Diaphorina citri OX=121845 GN=LOC103516252 PE=4 SV=1	Uncharacterized protein LOC103516252	LOC103516252	62.89	1550.65	7.2	213	225	S2:Phosphorylation (STY):109.53	S214	TRSQRASPEEEDL	2744.92	2532.18	1974.84	2955.91	1487.85	1358.49	Quantified
A0A1S3DGB8	A0A1S3DGB8|A0A1S3DGB8_DIACI:A0A1S3DG36|A0A1S3DG36_DIACI	S	AS(+79.97)PGHYEFGNSELSYK	2	16	PDZ and LIM domain protein 3 isoform X2 OS=Diaphorina citri OX=121845 GN=LOC103517780 PE=4 SV=1	PDZ and LIM domain protein 3 isoform X2	LOC103517780	73.87	1864.77	3.5	203	218	S2:Phosphorylation (STY):59.30	S204	NPMMRASPGHYEF	296697	387263	377618	287344	277212	185517	Quantified					PF00595(PDZ domain (Also known as DHR or GLGF));PF15936(Domain of unknown function (DUF4749))
A0A1S4E6I9	A0A1S4E6I9|A0A1S4E6I9_DIACI:A0A1S3CU09|A0A1S3CU09_DIACI	S	AS(+79.97)PPPPPVLPPSSR	2	14	Phosphoribosyl pyrophosphate synthase-associated protein 2 OS=Diaphorina citri OX=121845 GN=LOC103505233 PE=3 SV=1	Phosphoribosyl pyrophosphate synthase-associated protein 2	LOC103505233	76.5	1477.73	-0.9	203	216	S2:Phosphorylation (STY):101.25	S204	EVDGRASPPPPPV	94388.4	138951	145530	207943	96198.4	88717.9	Quantified	GO:0009116(BP:nucleoside metabolic process);GO:0009165(BP:nucleotide biosynthetic process);GO:0000287(MF:magnesium ion binding);GO:0004749(MF:ribose phosphate diphosphokinase activity)				PF13793(N-terminal domain of ribose phosphate pyrophosphokinase);PF14572(Phosphoribosyl synthetase-associated domain)
A0A1S3DU41	A0A1S3DU41|A0A1S3DU41_DIACI	S	AS(+79.97)PPWVK	2	7	Adhesive plaque matrix protein-like OS=Diaphorina citri OX=121845 GN=LOC103524757 PE=4 SV=1	Adhesive plaque matrix protein-like	LOC103524757	33.11	863.394	-1.3	217	223		S218	QSNQKASPPWVKS	1784.27		1044.71	1603.34	2834.83	2058.64	Quantified
A0A3Q0IKG4	A0A3Q0IKG4|A0A3Q0IKG4_DIACI	S	AS(+79.97)PTQDLK	2	8	LOW QUALITY PROTEIN: COP1-interactive protein 1-like OS=Diaphorina citri OX=121845 GN=LOC103505684 PE=3 SV=1	LOW QUALITY PROTEIN: COP1-interactive protein 1-like	LOC103505684	29.69	938.411	-3.7	1758	1765	S2:Phosphorylation (STY):22.85	S1759	KDTGRASPTQDLK	1442.54	134.085	141.237	3184.97	1233.41	1630.07	Quantified	GO:0010506(BP:regulation of autophagy);GO:0005615(CC:extracellular space)				PF11365(Protein SOGA)
A0A3Q0JBC3	A0A3Q0JBC3|A0A3Q0JBC3_DIACI	S	AS(+79.97)PTSISSQNPR	2	12	Uncharacterized protein LOC103518026 OS=Diaphorina citri OX=121845 GN=LOC103518026 PE=4 SV=1	Uncharacterized protein LOC103518026	LOC103518026	59.34	1323.58	-0.5	608	619	S2:Phosphorylation (STY):39.76	S609	QPHQRASPTSISS	12835	9886.69	8324.57	9769.11	4425.47	7699.27	Quantified	GO:0016021(CC:integral component of membrane)				PF13927(Immunoglobulin domain)
A0A3Q0IQW5	A0A3Q0IQW5|A0A3Q0IQW5_DIACI	S	AS(+79.97)PVFMGLK	2	9	Uncharacterized protein LOC108252263 OS=Diaphorina citri OX=121845 GN=LOC108252263 PE=4 SV=1	Uncharacterized protein LOC108252263	LOC108252263	54.66	1028.48	-2.3	749	757		S750	YENLKASPVFMGL	2787.66	1317.07	1832.55	519.406	917.433	807.851	Quantified
A0A3Q0IPF2	A0A3Q0IPF2|A0A3Q0IPF2_DIACI	S	AS(+79.97)PVIDFHK	2	9	Protein tramtrack, alpha isoform-like OS=Diaphorina citri OX=121845 GN=LOC113465852 PE=4 SV=1	Protein tramtrack, alpha isoform-like	LOC113465852	47.93	1092.5	-3.5	289	297		S290	QRGQRASPVIDFH	2917.52	2559.12	1698.18	2327.72	1228.57	1931.36	Quantified	GO:0003676(MF:nucleic acid binding)				PF13894(C2H2-type zinc finger)
A0A1S3DHH7	A0A1S3DHH7|A0A1S3DHH7_DIACI	S	AS(+79.97)QM(+15.99)QLVDTNK	2	11	Vicilin-like seed storage protein At2g18540 OS=Diaphorina citri OX=121845 GN=LOC103517821 PE=4 SV=1	Vicilin-like seed storage protein At2g18540	LOC103517821	47.29	1329.56	1.2	313	323	S2:Phosphorylation (STY):34.75;M4:Oxidation (M):1000.00	S314	PCDRRASQMQLVD	512.954	909.123	1525.06	1221.58	859.466	495.577	Quantified
A0A1S3DHH7	A0A1S3DHH7|A0A1S3DHH7_DIACI	S	AS(+79.97)QMQLVDTNK	2	11	Vicilin-like seed storage protein At2g18540 OS=Diaphorina citri OX=121845 GN=LOC103517821 PE=4 SV=1	Vicilin-like seed storage protein At2g18540	LOC103517821	61.51	1313.57	-2.2	313	323	S2:Phosphorylation (STY):79.54	S314	PCDRRASQMQLVD	4902.77	3963.75	5583.18	5450.13	3721.14	3472.56	Quantified
A0A3Q0IZ63	A0A3Q0IZ63|A0A3Q0IZ63_DIACI:A0A3Q0IYG7|A0A3Q0IYG7_DIACI	S	AS(+79.97)RDNLLDR	2	9	Microtubule-actin cross-linking factor 1-like isoform X3 OS=Diaphorina citri OX=121845 GN=LOC113465333 PE=4 SV=1	Microtubule-actin cross-linking factor 1-like isoform X3	LOC113465333	40.62	1138.51	-0.4	44	52		S45	KQSLRASRDNLLD	25831.7	40825.9	38313.1	48550.1	40520.1	26279.6	Quantified	GO:0045104(BP:intermediate filament cytoskeleton organization);GO:0005856(CC:cytoskeleton);GO:0005509(MF:calcium ion binding);GO:0008017(MF:microtubule binding)				PF13499(EF-hand domain pair);PF02187(Growth-Arrest-Specific Protein 2 Domain)
A0A3Q0J213	A0A3Q0J213|A0A3Q0J213_DIACI	S	AS(+79.97)S(+79.97)ADAGVIITDPNIAR	2	17	Rho GTPase-activating protein 92B OS=Diaphorina citri OX=121845 GN=LOC103511419 PE=4 SV=1	Rho GTPase-activating protein 92B	LOC103511419	24.38	1829.8	4.6	229	245	S2:Phosphorylation (STY):3.75;S3:Phosphorylation (STY):4.14	S230	NGHSRASSADAGV	269.237	221.989	97.0192	74.0084	131.881	282.525	Quantified	GO:0007165(BP:signal transduction)				PF00620(RhoGAP domain)
A0A3Q0J213	A0A3Q0J213|A0A3Q0J213_DIACI	S	AS(+79.97)S(+79.97)ADAGVIITDPNIAR	3	17	Rho GTPase-activating protein 92B OS=Diaphorina citri OX=121845 GN=LOC103511419 PE=4 SV=1	Rho GTPase-activating protein 92B	LOC103511419	24.38	1829.8	4.6	229	245	S2:Phosphorylation (STY):3.75;S3:Phosphorylation (STY):4.14	S231	GHSRASSADAGVI	269.237	221.989	97.0192	74.0084	131.881	282.525	Quantified	GO:0007165(BP:signal transduction)				PF00620(RhoGAP domain)
A0A3Q0J213	A0A3Q0J213|A0A3Q0J213_DIACI	S	AS(+79.97)SADAGVIITDPNIAR	2	17	Rho GTPase-activating protein 92B OS=Diaphorina citri OX=121845 GN=LOC103511419 PE=4 SV=1	Rho GTPase-activating protein 92B	LOC103511419	71.45	1749.83	2.2	229	245	S2:Phosphorylation (STY):0.00	S230	NGHSRASSADAGV	16238.6	30402.7	23164.9	27197.2	16507.5	17338.4	Quantified	GO:0007165(BP:signal transduction)				PF00620(RhoGAP domain)
A0A3Q0J125	A0A3Q0J125|A0A3Q0J125_DIACI	S	AS(+79.97)SEPLAYVAVATESASASAK	2	21	Cytochrome b-c1 complex subunit 2, mitochondrial OS=Diaphorina citri OX=121845 GN=LOC103510564 PE=4 SV=1	Cytochrome b-c1 complex subunit 2, mitochondrial	LOC103510564	67.04	2088.96	3.1	209	229	S2:Phosphorylation (STY):0.00	S210	GELRKASSEPLAY	1003.43	2276.31	967.037		1353.45	446.379	Quantified	GO:0003824(MF:catalytic activity);GO:0046872(MF:metal ion binding)	K00415(NA)	ko00190(Oxidative phosphorylation)		PF00675(Insulinase (Peptidase family M16));PF05193(Peptidase M16 inactive domain)
A0A1S4E7J1	A0A1S4E7J1|A0A1S4E7J1_DIACI	S	AS(+79.97)SIETQTLPAQSGK	2	15	WASH complex subunit 2 OS=Diaphorina citri OX=121845 GN=LOC103505989 PE=4 SV=1	WASH complex subunit 2	LOC103505989	53.68	1596.74	-0.1	1300	1314	S2:Phosphorylation (STY):0.00	S1301	EKIGRASSIETQT	1871	1497.44	1362.48	788.879	1043	534.543	Quantified	GO:0005634(CC:nucleus);GO:0003713(MF:transcription coactivator activity)				PF13820(Putative nucleic acid-binding region)
A0A1S4ECD8	A0A1S4ECD8|A0A1S4ECD8_DIACI	S	AS(+79.97)SIPTLSGSGLRPR	2	15	Mucin-1-like isoform X3 OS=Diaphorina citri OX=121845 GN=LOC103509848 PE=4 SV=1	Mucin-1-like isoform X3	LOC103509848	55.4	1577.79	2	179	193	S2:Phosphorylation (STY):0.00	S180	NSIHRASSIPTLS	3488.79	5388.04	1273.83	1035.66	1863.32	2094.66	Quantified
A0A3Q0JKA0	A0A3Q0JKA0|A0A3Q0JKA0_DIACI	S	AS(+79.97)SNPQWQPLVLVIPLR	2	17	Cysteine protease OS=Diaphorina citri OX=121845 GN=LOC103520402 PE=3 SV=1	Cysteine protease	LOC103520402	57.62	1997.05	4.2	114	130	S2:Phosphorylation (STY):0.00	S115	TTNKRASSNPQWQ	203.913	251.126		91.0377	276.459		Quantified	GO:0006914(BP:autophagy);GO:0015031(BP:protein transport);GO:0005737(CC:cytoplasm);GO:0004197(MF:cysteine-type endopeptidase activity)			Cytoplasm	PF03416(Peptidase family C54)
A0A1S3DFQ7	A0A1S3DFQ7|A0A1S3DFQ7_DIACI	S	AS(+79.97)SPTSLSEER	2	11	Uncharacterized protein OS=Diaphorina citri OX=121845 GN=LOC103516881 PE=4 SV=1	Uncharacterized protein	LOC103516881	29.19	1242.51	-1.2	93	103	S2:Phosphorylation (STY):0.00	S94	RGGRRASSPTSLS	2583.1	385.655	1631.16	2077.07	1133.94	1484.57	Quantified
A0A3Q0INZ4	A0A3Q0INZ4|A0A3Q0INZ4_DIACI	S	AS(+79.97)VEKPPTPAAVK	2	13	Eukaryotic translation initiation factor 4 gamma 3-like OS=Diaphorina citri OX=121845 GN=LOC103524978 PE=4 SV=1	Eukaryotic translation initiation factor 4 gamma 3-like	LOC103524978	67.91	1373.7	-0.6	296	308	S2:Phosphorylation (STY):34.81	S297	TPQKKASVEKPPT	4000.21	885.957	5896.06	19624.6	15544.7	13589.3	Quantified	GO:0003743(MF:translation initiation factor activity)				PF02854(MIF4G domain)
A0A3Q0IM36	A0A3Q0IM36|A0A3Q0IM36_DIACI	S	AS(+79.97)WNSVVQETLNAMTR	2	16	Uncharacterized protein LOC103524531 OS=Diaphorina citri OX=121845 GN=LOC103524531 PE=4 SV=1	Uncharacterized protein LOC103524531	LOC103524531	41.27	1885.84	1.2	43	58	S2:Phosphorylation (STY):3.64	S44	HNSLRASWNSVVQ	97.668	191.962			127.945		Quantified	GO:0016021(CC:integral component of membrane)
A0A1S4EJU2	A0A1S4EJU2|A0A1S4EJU2_DIACI:A0A3Q0IV54|A0A3Q0IV54_DIACI	S	AS(+79.97)YFGFFDTAK	2	11	ADP/ATP translocase OS=Diaphorina citri OX=121845 GN=LOC103516169 PE=3 SV=1	ADP/ATP translocase	LOC103516169	55.28	1332.54	-5.1	189	199	S2:Phosphorylation (STY):0.00	S190	IIIYRASYFGFFD	317.411	320.462	538.823	200.497	409.971	222.533	Quantified	GO:0016021(CC:integral component of membrane);GO:0005743(CC:mitochondrial inner membrane);GO:0005347(MF:ATP transmembrane transporter activity)	K05863(NA)	ko04020(Calcium signaling pathway);ko04022(cGMP-PKG signaling pathway);ko04217(Necroptosis);ko04218(Cellular senescence)	Membrane;Multi-pass membrane protein	PF00153(Mitochondrial carrier protein)
A0A3Q0JEA2	A0A3Q0JEA2|A0A3Q0JEA2_DIACI	S	ASAAILQNQS(+79.97)PK	10	12	Facilitated trehalose transporter Tret1-like OS=Diaphorina citri OX=121845 GN=LOC103519505 PE=4 SV=1	Facilitated trehalose transporter Tret1-like	LOC103519505	58.96	1306.63	-2.8	477	488	S10:Phosphorylation (STY):66.10	S486	AILQNQSPKIVVS	931.926	825.31	613.92	5048.45	2758.31	2724.83	Quantified	GO:0016021(CC:integral component of membrane);GO:0022857(MF:transmembrane transporter activity)				PF00083(Sugar (and other) transporter)
A0A3Q0IL42	A0A3Q0IL42|A0A3Q0IL42_DIACI	S	ASAITS(+79.97)PPQENVEVK	6	15	Ankyrin-3-like OS=Diaphorina citri OX=121845 GN=LOC103505993 PE=4 SV=1	Ankyrin-3-like	LOC103505993	61.55	1648.77	2.9	1656	1670	S6:Phosphorylation (STY):24.44	S1661	KASAITSPPQENV	8053.02	9440.93	8949.15	10658.8	3635.76	4797.2	Quantified	GO:0007165(BP:signal transduction)			Cytoplasm;cytoskeleton;Membrane	PF00531(Death domain);PF00791(ZU5 domain);PF12796(Ankyrin repeats (3 copies));PF00023(Ankyrin repeat);PF13857(Ankyrin repeats (many copies))
A0A3Q0IPJ2	A0A3Q0IPJ2|A0A3Q0IPJ2_DIACI	S	ASALDEEDSS(+79.97)ATR	10	13	LOW QUALITY PROTEIN: obscurin-like OS=Diaphorina citri OX=121845 GN=LOC103507575 PE=3 SV=1	LOW QUALITY PROTEIN: obscurin-like	LOC103507575	45.45	1430.56	-4.3	751	763	S10:Phosphorylation (STY):0.00	S760	LDEEDSSATRTKR	176.247	1576.51	1380.27	3050.83	2777.31	86.6926	Quantified	GO:0005524(MF:ATP binding);GO:0005085(MF:guanyl-nucleotide exchange factor activity);GO:0004672(MF:protein kinase activity)				PF00621(RhoGEF domain);PF00069(Protein kinase domain);PF00041(Fibronectin type III domain);PF07679(Immunoglobulin I-set domain)
A0A3Q0J390	A0A3Q0J390|A0A3Q0J390_DIACI	S	ASAVPLSS(+79.97)PQPFR	8	13	Dual specificity mitogen-activated protein kinase kinase hemipterous-like OS=Diaphorina citri OX=121845 GN=LOC103512031 PE=4 SV=1	Dual specificity mitogen-activated protein kinase kinase hemipterous-like	LOC103512031	30.89	1435.69	-1.1	228	240	S8:Phosphorylation (STY):0.00	S235	SAVPLSSPQPFRR	162.69	321.291	342.523	298.657	233.213	193.961	Quantified	GO:0005524(MF:ATP binding);GO:0004672(MF:protein kinase activity)				PF00069(Protein kinase domain)
A0A1S4ED67	A0A1S4ED67|A0A1S4ED67_DIACI	T	ASDIT(+79.97)YGVT(+79.97)TKEER	5	14	Leucine-rich repeat-containing protein DDB_G0290503 OS=Diaphorina citri OX=121845 GN=LOC108252562 PE=4 SV=1	Leucine-rich repeat-containing protein DDB_G0290503	LOC108252562	31.76	1728.7	0.5	422	435	T5:Phosphorylation (STY):0.00;T9:Phosphorylation (STY):0.00	T426	SRASDITYGVTTK	7905.03	7504.37	5433.36	4804.47	2142.57	8341.35	Quantified
A0A1S4ED67	A0A1S4ED67|A0A1S4ED67_DIACI	T	ASDIT(+79.97)YGVT(+79.97)TKEER	9	14	Leucine-rich repeat-containing protein DDB_G0290503 OS=Diaphorina citri OX=121845 GN=LOC108252562 PE=4 SV=1	Leucine-rich repeat-containing protein DDB_G0290503	LOC108252562	31.76	1728.7	0.5	422	435	T5:Phosphorylation (STY):0.00;T9:Phosphorylation (STY):0.00	T430	DITYGVTTKEERR	7905.03	7504.37	5433.36	4804.47	2142.57	8341.35	Quantified
A0A1S4ED67	A0A1S4ED67|A0A1S4ED67_DIACI	Y	ASDITY(+79.97)GVTTKEER	6	14	Leucine-rich repeat-containing protein DDB_G0290503 OS=Diaphorina citri OX=121845 GN=LOC108252562 PE=4 SV=1	Leucine-rich repeat-containing protein DDB_G0290503	LOC108252562	28.96	1648.73	5.9	422	435	Y6:Phosphorylation (STY):0.00	Y427	RASDITYGVTTKE	325.109	154.286	108.011	222.712	85.8931	230.814	Quantified
A0A3Q0JKS3	A0A3Q0JKS3|A0A3Q0JKS3_DIACI	S	ASDNEAEHYS(+79.97)DDEDSNLK	10	18	Protein RCC2 homolog isoform X1 OS=Diaphorina citri OX=121845 GN=LOC103523765 PE=4 SV=1	Protein RCC2 homolog isoform X1	LOC103523765	34.75	2117.77	3.1	48	65	S10:Phosphorylation (STY):11.06	S57	NEAEHYSDDEDSN	240.83	309.164	373.488	1306.69	2360.38	464.785	Quantified					PF00415(Regulator of chromosome condensation (RCC1) repeat)
A0A3Q0IT51	A0A3Q0IT51|A0A3Q0IT51_DIACI:A0A3Q0IT53|A0A3Q0IT53_DIACI:A0A3Q0IYE3|A0A3Q0IYE3_DIACI	S	ASEDS(+79.97)QDNLEAIESNLQK	5	18	Spindle pole body component 110-like isoform X2 OS=Diaphorina citri OX=121845 GN=LOC113467456 PE=4 SV=1	Spindle pole body component 110-like isoform X2	LOC113467456	50.18	2069.88	4.2	184	201	S5:Phosphorylation (STY):4.05	S188	LKASEDSQDNLEA	5948.36	4430.51	7338.59	3877.6	3474	2393.58	Quantified
A0A3Q0JAI0	A0A3Q0JAI0|A0A3Q0JAI0_DIACI	S	ASEFAFIS(+79.97)GTK	8	11	Bifunctional 3'-phosphoadenosine 5'-phosphosulfate synthase-like OS=Diaphorina citri OX=121845 GN=LOC103517628 PE=4 SV=1	Bifunctional 3'-phosphoadenosine 5'-phosphosulfate synthase-like	LOC103517628	44.56	1236.54	-5.2	473	483	S8:Phosphorylation (STY):0.00	S480	SEFAFISGTKMRN	167.331	185.931	496.87	359.992	357.236	293.221	Quantified	GO:0004781(MF:sulfate adenylyltransferase (ATP) activity)	K13811(NA)	ko00230(Purine metabolism);ko00261(Monobactam biosynthesis);ko00450(Selenocompound metabolism);ko00920(Sulfur metabolism)		PF01747(ATP-sulfurylase);PF14306(PUA-like domain);PF01583(Adenylylsulphate kinase)
A0A3Q0JAI0	A0A3Q0JAI0|A0A3Q0JAI0_DIACI	T	ASEFAFISGT(+79.97)K	10	11	Bifunctional 3'-phosphoadenosine 5'-phosphosulfate synthase-like OS=Diaphorina citri OX=121845 GN=LOC103517628 PE=4 SV=1	Bifunctional 3'-phosphoadenosine 5'-phosphosulfate synthase-like	LOC103517628	39.65	1236.54	-0.9	473	483	T10:Phosphorylation (STY):11.10	T482	FAFISGTKMRNYA	144.452	201.396	596.246	348.295	357.236	293.221	Quantified	GO:0004781(MF:sulfate adenylyltransferase (ATP) activity)	K13811(NA)	ko00230(Purine metabolism);ko00261(Monobactam biosynthesis);ko00450(Selenocompound metabolism);ko00920(Sulfur metabolism)		PF01747(ATP-sulfurylase);PF14306(PUA-like domain);PF01583(Adenylylsulphate kinase)
A0A3Q0ITU5	A0A3Q0ITU5|A0A3Q0ITU5_DIACI	S	ASEGEHS(+79.97)SPRKS(+79.97)LVDETEGK	7	20	Muscle M-line assembly protein unc-89-like OS=Diaphorina citri OX=121845 GN=LOC113467622 PE=4 SV=1	Muscle M-line assembly protein unc-89-like	LOC113467622	33.28	2301.95	-1.3	321	340	S7:Phosphorylation (STY):0.00;S12:Phosphorylation (STY):0.00	S327	ASEGEHSSPRKSL		312.416	628.764	1018.35	1446.34	56.5176	Quantified	GO:0000226(BP:microtubule cytoskeleton organization);GO:0005874(CC:microtubule);GO:0008017(MF:microtubule binding)
A0A3Q0ITU5	A0A3Q0ITU5|A0A3Q0ITU5_DIACI	S	ASEGEHS(+79.97)SPRKS(+79.97)LVDETEGK	12	20	Muscle M-line assembly protein unc-89-like OS=Diaphorina citri OX=121845 GN=LOC113467622 PE=4 SV=1	Muscle M-line assembly protein unc-89-like	LOC113467622	33.28	2301.95	-1.3	321	340	S7:Phosphorylation (STY):0.00;S12:Phosphorylation (STY):0.00	S332	HSSPRKSLVDETE		312.416	628.764	1018.35	1446.34	56.5176	Quantified	GO:0000226(BP:microtubule cytoskeleton organization);GO:0005874(CC:microtubule);GO:0008017(MF:microtubule binding)
A0A3Q0ITU5	A0A3Q0ITU5|A0A3Q0ITU5_DIACI	S	ASEGEHS(+79.97)SPRKSLVDET(+79.97)EGK	7	20	Muscle M-line assembly protein unc-89-like OS=Diaphorina citri OX=121845 GN=LOC113467622 PE=4 SV=1	Muscle M-line assembly protein unc-89-like	LOC113467622	27	2301.95	-4.8	321	340	S7:Phosphorylation (STY):0.00;T17:Phosphorylation (STY):5.81	S327	ASEGEHSSPRKSL		801.74	628.764	2216.93	1446.34	156.654	Quantified	GO:0000226(BP:microtubule cytoskeleton organization);GO:0005874(CC:microtubule);GO:0008017(MF:microtubule binding)
A0A3Q0ITU5	A0A3Q0ITU5|A0A3Q0ITU5_DIACI	T	ASEGEHS(+79.97)SPRKSLVDET(+79.97)EGK	17	20	Muscle M-line assembly protein unc-89-like OS=Diaphorina citri OX=121845 GN=LOC113467622 PE=4 SV=1	Muscle M-line assembly protein unc-89-like	LOC113467622	27	2301.95	-4.8	321	340	S7:Phosphorylation (STY):0.00;T17:Phosphorylation (STY):5.81	T337	KSLVDETEGKQPS		801.74	628.764	2216.93	1446.34	156.654	Quantified	GO:0000226(BP:microtubule cytoskeleton organization);GO:0005874(CC:microtubule);GO:0008017(MF:microtubule binding)
A0A1S4EDL1	A0A1S4EDL1|A0A1S4EDL1_DIACI	S	ASFSEDNDS(+79.97)EK	9	11	Ras GTPase-activating protein-binding protein 1 isoform X1 OS=Diaphorina citri OX=121845 GN=LOC103511029 PE=4 SV=1	Ras GTPase-activating protein-binding protein 1 isoform X1	LOC103511029	40.13	1307.46	-2.4	365	375	S9:Phosphorylation (STY):23.70	S373	FSEDNDSEKSMGY			350.726	503.613	1156.84	108.962	Quantified	GO:0003723(MF:RNA binding)				PF00076(RNA recognition motif. (a.k.a. RRM, RBD, or RNP domain));PF02136(Nuclear transport factor 2 (NTF2) domain)
A0A3Q0J7Z6	A0A3Q0J7Z6|A0A3Q0J7Z6_DIACI	S	ASGGS(+79.97)EGQYSPPHSPVR	5	17	protein-serine/threonine phosphatase OS=Diaphorina citri OX=121845 GN=LOC103514310 PE=4 SV=1	protein-serine/threonine phosphatase	LOC103514310	32.91	1791.76	0.9	112	128	S5:Phosphorylation (STY):0.00	S116	SKASGGSEGQYSP	6591.36	3800.57	5009.14	8586.78	5513.09	5582.55	Quantified	GO:0008420(MF:RNA polymerase II CTD heptapeptide repeat phosphatase activity)				PF03031(NLI interacting factor-like phosphatase)
A0A3Q0J7Z6	A0A3Q0J7Z6|A0A3Q0J7Z6_DIACI	S	ASGGSEGQYS(+79.97)PPHS(+79.97)PVR	10	17	protein-serine/threonine phosphatase OS=Diaphorina citri OX=121845 GN=LOC103514310 PE=4 SV=1	protein-serine/threonine phosphatase	LOC103514310	33.63	1871.72	0.9	112	128	S10:Phosphorylation (STY):0.00;S14:Phosphorylation (STY):21.59	S121	GSEGQYSPPHSPV	1824.29	4076.99	4677.46	4290.72	3335.35	4181.78	Quantified	GO:0008420(MF:RNA polymerase II CTD heptapeptide repeat phosphatase activity)				PF03031(NLI interacting factor-like phosphatase)
A0A3Q0J7Z6	A0A3Q0J7Z6|A0A3Q0J7Z6_DIACI	S	ASGGSEGQYS(+79.97)PPHS(+79.97)PVR	14	17	protein-serine/threonine phosphatase OS=Diaphorina citri OX=121845 GN=LOC103514310 PE=4 SV=1	protein-serine/threonine phosphatase	LOC103514310	33.63	1871.72	0.9	112	128	S10:Phosphorylation (STY):0.00;S14:Phosphorylation (STY):21.59	S125	QYSPPHSPVRLLP	1824.29	4076.99	4677.46	4290.72	3335.35	4181.78	Quantified	GO:0008420(MF:RNA polymerase II CTD heptapeptide repeat phosphatase activity)				PF03031(NLI interacting factor-like phosphatase)
A0A3Q0J7Z6	A0A3Q0J7Z6|A0A3Q0J7Z6_DIACI	S	ASGGSEGQYS(+79.97)PPHSPVR	10	17	protein-serine/threonine phosphatase OS=Diaphorina citri OX=121845 GN=LOC103514310 PE=4 SV=1	protein-serine/threonine phosphatase	LOC103514310	53.1	1791.76	4.1	112	128	S10:Phosphorylation (STY):14.02	S121	GSEGQYSPPHSPV	2132.66	14713.1	18914	4713.54	10926.4	8786.09	Quantified	GO:0008420(MF:RNA polymerase II CTD heptapeptide repeat phosphatase activity)				PF03031(NLI interacting factor-like phosphatase)
A0A3Q0J9K8	A0A3Q0J9K8|A0A3Q0J9K8_DIACI	T	ASGSVTIGNTT(+79.97)ISPVTK	11	17	Sentrin-specific protease 6-like OS=Diaphorina citri OX=121845 GN=LOC113470681 PE=3 SV=1	Sentrin-specific protease 6-like	LOC113470681	36.64	1711.84	3.1	368	384	T11:Phosphorylation (STY):0.00	T378	VTIGNTTISPVTK	69.1855	103.377	394.679	962.97	386.939	278.728	Quantified	GO:0008234(MF:cysteine-type peptidase activity)				PF02902(Ulp1 protease family, C-terminal catalytic domain)
A0A3Q0J9K8	A0A3Q0J9K8|A0A3Q0J9K8_DIACI	S	ASGSVTIGNTTIS(+79.97)PVTK	13	17	Sentrin-specific protease 6-like OS=Diaphorina citri OX=121845 GN=LOC113470681 PE=3 SV=1	Sentrin-specific protease 6-like	LOC113470681	38.62	1711.84	4.7	368	384	S13:Phosphorylation (STY):18.53	S380	IGNTTISPVTKAP	165.878	306.032	145.857	962.97	141.381	278.728	Quantified	GO:0008234(MF:cysteine-type peptidase activity)				PF02902(Ulp1 protease family, C-terminal catalytic domain)
A0A3Q0JCM9	A0A3Q0JCM9|A0A3Q0JCM9_DIACI:A0A3Q0J8B0|A0A3Q0J8B0_DIACI	S	ASHDDRPLSVESALPVFDENAS(+79.97)PSSSK	22	27	Uncharacterized protein LOC103516534 OS=Diaphorina citri OX=121845 GN=LOC103516534 PE=4 SV=1	Uncharacterized protein LOC103516534	LOC103516534	42.69	2921.31	-8.2	43	69	S22:Phosphorylation (STY):17.01	S64	VFDENASPSSSKI	531.547	151.948	123.842	256.271	280.187	743.471	Quantified					PF05186(Dpy-30 motif)
A0A1S3D1D1	A0A1S3D1D1|A0A1S3D1D1_DIACI:A0A3Q0JIZ1|A0A3Q0JIZ1_DIACI	S	ASIISPS(+79.97)SPTLPR	7	13	Uncharacterized protein LOC103509314 isoform X1 OS=Diaphorina citri OX=121845 GN=LOC103509314 PE=4 SV=1	Uncharacterized protein LOC103509314 isoform X1	LOC103509314	57.3	1404.7	-1.1	407	419	S7:Phosphorylation (STY):10.11	S413	ASIISPSSPTLPR	7481.53	8173.83	11025.2	579.289	2507.82	205.173	Quantified	GO:0016021(CC:integral component of membrane)				PF15993(Fuseless)
A0A1S3D1D1	A0A1S3D1D1|A0A1S3D1D1_DIACI:A0A3Q0JIZ1|A0A3Q0JIZ1_DIACI	S	ASIISPSS(+79.97)PTLPR	8	13	Uncharacterized protein LOC103509314 isoform X1 OS=Diaphorina citri OX=121845 GN=LOC103509314 PE=4 SV=1	Uncharacterized protein LOC103509314 isoform X1	LOC103509314	58.3	1404.7	-1.1	407	419	S8:Phosphorylation (STY):14.04	S414	SIISPSSPTLPRE	7481.53	8173.83	11025.2	5683.72	2507.82	5250.52	Quantified	GO:0016021(CC:integral component of membrane)				PF15993(Fuseless)
A0A3Q0JC75	A0A3Q0JC75|A0A3Q0JC75_DIACI	S	ASISS(+79.97)SIPSLQEDK	5	14	Adiponectin receptor protein-like OS=Diaphorina citri OX=121845 GN=LOC103518450 PE=3 SV=1	Adiponectin receptor protein-like	LOC103518450	24.37	1540.7	-0.6	29	42	S5:Phosphorylation (STY):0.00	S33	DKASISSSIPSLQ	606.168	736.846	593.349	119.178	105.923	517.751	Quantified	GO:0016021(CC:integral component of membrane)			Membrane;Multi-pass membrane protein
A0A3Q0JD89	A0A3Q0JD89|A0A3Q0JD89_DIACI:A0A1S3DE40|A0A1S3DE40_DIACI	S	ASLETS(+79.97)LTDLR	6	11	Uncharacterized protein LOC103516823 isoform X2 OS=Diaphorina citri OX=121845 GN=LOC103516823 PE=4 SV=1	Uncharacterized protein LOC103516823 isoform X2	LOC103516823	37.81	1284.6	-7.9	250	260	S6:Phosphorylation (STY):9.34	S255	RASLETSLTDLRK	134.368	476.887	467.898	234.15	388.563	307.302	Quantified
A0A1S4EML9	A0A1S4EML9|A0A1S4EML9_DIACI	Y	ASLLNLLHKY(+79.97)SQEVLK	10	16	Uncharacterized protein LOC103518729 OS=Diaphorina citri OX=121845 GN=LOC103518729 PE=4 SV=1	Uncharacterized protein LOC103518729	LOC103518729	46.87	1935.02	4.8	307	322	Y10:Phosphorylation (STY):0.00	Y316	LNLLHKYSQEVLK	1129.61	2891.6	357.718		6708.06	1163.2	Quantified
A0A3Q0IYW7	A0A3Q0IYW7|A0A3Q0IYW7_DIACI	S	ASLLNS(+79.97)DS(+79.97)DEKETPK	6	15	ATP-dependent helicase ATRX OS=Diaphorina citri OX=121845 GN=LOC103512045 PE=3 SV=1	ATP-dependent helicase ATRX	LOC103512045	40.72	1792.72	2.2	814	828	S6:Phosphorylation (STY):14.15;S8:Phosphorylation (STY):7.61	S819	KASLLNSDSDEKE	9007.35	7034.2	5993.1	10707.2	5005.69	9797.79	Quantified	GO:0005524(MF:ATP binding);GO:0046872(MF:metal ion binding)	K10779(NA)	ko04110(Cell cycle)	Chromosome;telomere;Nucleus	PF00271(Helicase conserved C-terminal domain);PF00176(SNF2 family N-terminal domain)
A0A3Q0IYW7	A0A3Q0IYW7|A0A3Q0IYW7_DIACI	S	ASLLNS(+79.97)DS(+79.97)DEKETPK	8	15	ATP-dependent helicase ATRX OS=Diaphorina citri OX=121845 GN=LOC103512045 PE=3 SV=1	ATP-dependent helicase ATRX	LOC103512045	40.72	1792.72	2.2	814	828	S6:Phosphorylation (STY):14.15;S8:Phosphorylation (STY):7.61	S821	SLLNSDSDEKETP	9007.35	7034.2	5993.1	10707.2	5005.69	9797.79	Quantified	GO:0005524(MF:ATP binding);GO:0046872(MF:metal ion binding)	K10779(NA)	ko04110(Cell cycle)	Chromosome;telomere;Nucleus	PF00271(Helicase conserved C-terminal domain);PF00176(SNF2 family N-terminal domain)
A0A1S4ESJ8	A0A1S4ESJ8|A0A1S4ESJ8_DIACI	S	ASLQDS(+79.97)DS(+79.97)DNDL	6	12	Proteasome subunit alpha type OS=Diaphorina citri OX=121845 GN=LOC103524149 PE=3 SV=1	Proteasome subunit alpha type	LOC103524149	55.8	1438.45	0.4	242	253	S6:Phosphorylation (STY):41.04;S8:Phosphorylation (STY):30.57	S247	KASLQDSDSDNDL	30082.1	17624.7	733.74	14354.3	80.6251	63499.1	Quantified	GO:0006511(BP:ubiquitin-dependent protein catabolic process);GO:0005737(CC:cytoplasm);GO:0005634(CC:nucleus);GO:0019773(CC:proteasome core complex, alpha-subunit complex);GO:0004298(MF:threonine-type endopeptidase activity)	K02727(NA)	ko03050(Proteasome)	Cytoplasm;Nucleus	PF10584(Proteasome subunit A N-terminal signature);PF00227(Proteasome subunit)
A0A1S4ESJ8	A0A1S4ESJ8|A0A1S4ESJ8_DIACI	S	ASLQDS(+79.97)DS(+79.97)DNDL	8	12	Proteasome subunit alpha type OS=Diaphorina citri OX=121845 GN=LOC103524149 PE=3 SV=1	Proteasome subunit alpha type	LOC103524149	55.8	1438.45	0.4	242	253	S6:Phosphorylation (STY):41.04;S8:Phosphorylation (STY):30.57	S249	SLQDSDSDNDL__	30082.1	17624.7	733.74	14354.3	80.6251	63499.1	Quantified	GO:0006511(BP:ubiquitin-dependent protein catabolic process);GO:0005737(CC:cytoplasm);GO:0005634(CC:nucleus);GO:0019773(CC:proteasome core complex, alpha-subunit complex);GO:0004298(MF:threonine-type endopeptidase activity)	K02727(NA)	ko03050(Proteasome)	Cytoplasm;Nucleus	PF10584(Proteasome subunit A N-terminal signature);PF00227(Proteasome subunit)
A0A1S4ESJ8	A0A1S4ESJ8|A0A1S4ESJ8_DIACI	S	ASLQDS(+79.97)DSDNDL	6	12	Proteasome subunit alpha type OS=Diaphorina citri OX=121845 GN=LOC103524149 PE=3 SV=1	Proteasome subunit alpha type	LOC103524149	47.09	1358.49	0	242	253	S6:Phosphorylation (STY):12.81	S247	KASLQDSDSDNDL	3784.99	2914.11	2761.43	6435.28	14544	10147.6	Quantified	GO:0006511(BP:ubiquitin-dependent protein catabolic process);GO:0005737(CC:cytoplasm);GO:0005634(CC:nucleus);GO:0019773(CC:proteasome core complex, alpha-subunit complex);GO:0004298(MF:threonine-type endopeptidase activity)	K02727(NA)	ko03050(Proteasome)	Cytoplasm;Nucleus	PF10584(Proteasome subunit A N-terminal signature);PF00227(Proteasome subunit)
A0A3Q0IKV2	A0A3Q0IKV2|A0A3Q0IKV2_DIACI	S	ASLTS(+79.97)LRS(+79.97)NEVAGGAGGLPAGTEAAVER	5	28	Junctophilin-1 OS=Diaphorina citri OX=121845 GN=LOC103505743 PE=3 SV=1	Junctophilin-1	LOC103505743	40.34	2800.28	-2.7	195	222	S5:Phosphorylation (STY):0.00;S8:Phosphorylation (STY):0.00	S199	LRASLTSLRSNEV	550.984	285.466	370.082	347.628	1254.73	172.579	Quantified	GO:0030314(CC:junctional membrane complex)			Endoplasmic reticulum membrane;Single-pass type IV membrane protein;Membrane	PF02493(MORN repeat)
A0A3Q0IKV2	A0A3Q0IKV2|A0A3Q0IKV2_DIACI	S	ASLTS(+79.97)LRS(+79.97)NEVAGGAGGLPAGTEAAVER	8	28	Junctophilin-1 OS=Diaphorina citri OX=121845 GN=LOC103505743 PE=3 SV=1	Junctophilin-1	LOC103505743	40.34	2800.28	-2.7	195	222	S5:Phosphorylation (STY):0.00;S8:Phosphorylation (STY):0.00	S202	SLTSLRSNEVAGG	550.984	285.466	370.082	347.628	1254.73	172.579	Quantified	GO:0030314(CC:junctional membrane complex)			Endoplasmic reticulum membrane;Single-pass type IV membrane protein;Membrane	PF02493(MORN repeat)
A0A3Q0IN52	A0A3Q0IN52|A0A3Q0IN52_DIACI	T	ASNLLGEAVNTSLVT(+79.97)VQSR	15	19	LOW QUALITY PROTEIN: titin OS=Diaphorina citri OX=121845 GN=LOC103524768 PE=4 SV=1	LOW QUALITY PROTEIN: titin	LOC103524768	54.16	2038.01	0.1	2185	2203	T15:Phosphorylation (STY):22.45	T2199	VNTSLVTVQSRKN	2349.4	1435.69	2229.21	1188.29	709.491	1359.31	Quantified					PF07679(Immunoglobulin I-set domain);PF06582(Repeat of unknown function (DUF1136))
A0A3Q0IN52	A0A3Q0IN52|A0A3Q0IN52_DIACI	S	ASNLLGEAVNTSLVTVQS(+79.97)R	18	19	LOW QUALITY PROTEIN: titin OS=Diaphorina citri OX=121845 GN=LOC103524768 PE=4 SV=1	LOW QUALITY PROTEIN: titin	LOC103524768	71.14	2038.01	0.1	2185	2203	S18:Phosphorylation (STY):22.34	S2202	SLVTVQSRKNIYL	2449.8	2969.3	5332.19	3504.3	6906.1	2080.37	Quantified					PF07679(Immunoglobulin I-set domain);PF06582(Repeat of unknown function (DUF1136))
A0A3Q0IVB2	A0A3Q0IVB2|A0A3Q0IVB2_DIACI	S	ASPASSAPS(+79.97)PSASPAFSMR	9	19	Transcription elongation factor spt6 OS=Diaphorina citri OX=121845 GN=LOC103510308 PE=3 SV=1	Transcription elongation factor spt6	LOC103510308	43.18	1884.81	4.7	1321	1339	S9:Phosphorylation (STY):14.04	S1329	PASSAPSPSASPA	357.02	635.48	504.505	843.217	203.715	430.066	Quantified	GO:0032968(BP:positive regulation of transcription elongation from RNA polymerase II promoter);GO:0005634(CC:nucleus);GO:0003677(MF:DNA binding);GO:0003746(MF:translation elongation factor activity)			Nucleus	PF14641(Helix-turn-helix DNA-binding domain of SPT6);PF00575(S1 RNA binding domain);PF14635(Helix-hairpin-helix motif);PF14632(Acidic N-terminal SPT6);PF14633(SH2 domain);PF14878(Death-like domain of SPT6);PF14639(Holliday-junction resolvase-like of SPT6)
A0A3Q0IVB2	A0A3Q0IVB2|A0A3Q0IVB2_DIACI	S	ASPASSAPSPS(+79.97)ASPAFSMR	11	19	Transcription elongation factor spt6 OS=Diaphorina citri OX=121845 GN=LOC103510308 PE=3 SV=1	Transcription elongation factor spt6	LOC103510308	44.76	1884.81	-1.2	1321	1339	S11:Phosphorylation (STY):5.03	S1331	SSAPSPSASPAFS	357.02	635.48	304.821	454.31	728.338	430.066	Quantified	GO:0032968(BP:positive regulation of transcription elongation from RNA polymerase II promoter);GO:0005634(CC:nucleus);GO:0003677(MF:DNA binding);GO:0003746(MF:translation elongation factor activity)			Nucleus	PF14641(Helix-turn-helix DNA-binding domain of SPT6);PF00575(S1 RNA binding domain);PF14635(Helix-hairpin-helix motif);PF14632(Acidic N-terminal SPT6);PF14633(SH2 domain);PF14878(Death-like domain of SPT6);PF14639(Holliday-junction resolvase-like of SPT6)
A0A1S3DGB8	A0A1S3DGB8|A0A1S3DGB8_DIACI:A0A1S3DG36|A0A1S3DG36_DIACI	S	ASPGHYEFGNSELS(+79.97)YK	14	16	PDZ and LIM domain protein 3 isoform X2 OS=Diaphorina citri OX=121845 GN=LOC103517780 PE=4 SV=1	PDZ and LIM domain protein 3 isoform X2	LOC103517780	25.98	1864.77	0.4	203	218	S14:Phosphorylation (STY):7.77	S216	FGNSELSYKQKVA	406.101	760.412	569.194	2553.42	1706.54	1853.64	Quantified					PF00595(PDZ domain (Also known as DHR or GLGF));PF15936(Domain of unknown function (DUF4749))
A0A1S4E8Q6	A0A1S4E8Q6|A0A1S4E8Q6_DIACI	S	ASPLDPVQEM(+15.99)M(+15.99)YS(+79.97)STVS(+79.97)LK	13	19	Vacuolar protein sorting-associated protein 13-like OS=Diaphorina citri OX=121845 GN=LOC103506922 PE=4 SV=1	Vacuolar protein sorting-associated protein 13-like	LOC103506922	27.4	2273.92	-0.1	193	211	M10:Oxidation (M):1000.00;M11:Oxidation (M):1000.00;S13:Phosphorylation (STY):0.00;S17:Phosphorylation (STY):14.62	S205	VQEMMYSSTVSLK	1735.34	331.277	2506.48	734.538	2040.93	100.475	Quantified					PF16910(Repeating coiled region of VPS13)
A0A1S4E8Q6	A0A1S4E8Q6|A0A1S4E8Q6_DIACI	S	ASPLDPVQEM(+15.99)M(+15.99)YS(+79.97)STVS(+79.97)LK	17	19	Vacuolar protein sorting-associated protein 13-like OS=Diaphorina citri OX=121845 GN=LOC103506922 PE=4 SV=1	Vacuolar protein sorting-associated protein 13-like	LOC103506922	27.4	2273.92	-0.1	193	211	M10:Oxidation (M):1000.00;M11:Oxidation (M):1000.00;S13:Phosphorylation (STY):0.00;S17:Phosphorylation (STY):14.62	S209	MYSSTVSLKKVEM	1735.34	331.277	2506.48	734.538	2040.93	100.475	Quantified					PF16910(Repeating coiled region of VPS13)
A0A1S4E8Q6	A0A1S4E8Q6|A0A1S4E8Q6_DIACI	S	ASPLDPVQEM(+15.99)M(+15.99)YSS(+79.97)TVS(+79.97)LK	14	19	Vacuolar protein sorting-associated protein 13-like OS=Diaphorina citri OX=121845 GN=LOC103506922 PE=4 SV=1	Vacuolar protein sorting-associated protein 13-like	LOC103506922	37.03	2273.92	-0.6	193	211	M10:Oxidation (M):1000.00;M11:Oxidation (M):1000.00;S14:Phosphorylation (STY):0.00;S17:Phosphorylation (STY):7.38	S206	QEMMYSSTVSLKK	1735.34	1213.76	2506.48	859.318	1512.41	130.036	Quantified					PF16910(Repeating coiled region of VPS13)
A0A1S4E8Q6	A0A1S4E8Q6|A0A1S4E8Q6_DIACI	S	ASPLDPVQEM(+15.99)M(+15.99)YSS(+79.97)TVS(+79.97)LK	17	19	Vacuolar protein sorting-associated protein 13-like OS=Diaphorina citri OX=121845 GN=LOC103506922 PE=4 SV=1	Vacuolar protein sorting-associated protein 13-like	LOC103506922	37.03	2273.92	-0.6	193	211	M10:Oxidation (M):1000.00;M11:Oxidation (M):1000.00;S14:Phosphorylation (STY):0.00;S17:Phosphorylation (STY):7.38	S209	MYSSTVSLKKVEM	1735.34	1213.76	2506.48	859.318	1512.41	130.036	Quantified					PF16910(Repeating coiled region of VPS13)
A0A1S4E8Q6	A0A1S4E8Q6|A0A1S4E8Q6_DIACI	S	ASPLDPVQEM(+15.99)M(+15.99)YSSTVS(+79.97)LK	17	19	Vacuolar protein sorting-associated protein 13-like OS=Diaphorina citri OX=121845 GN=LOC103506922 PE=4 SV=1	Vacuolar protein sorting-associated protein 13-like	LOC103506922	28	2193.96	12.4	193	211	M10:Oxidation (M):1000.00;M11:Oxidation (M):1000.00;S17:Phosphorylation (STY):0.00	S209	MYSSTVSLKKVEM	240.949	266.854	67.6951	219.913	344.935	224.002	Quantified					PF16910(Repeating coiled region of VPS13)
A0A1S4E8Q6	A0A1S4E8Q6|A0A1S4E8Q6_DIACI	S	ASPLDPVQEM(+15.99)MYS(+79.97)STVS(+79.97)LK	13	19	Vacuolar protein sorting-associated protein 13-like OS=Diaphorina citri OX=121845 GN=LOC103506922 PE=4 SV=1	Vacuolar protein sorting-associated protein 13-like	LOC103506922	39.08	2257.93	3.5	193	211	M10:Oxidation (M):0.00;S13:Phosphorylation (STY):0.00;S17:Phosphorylation (STY):14.04	S205	VQEMMYSSTVSLK	5494.61	9225.49	4421.51	5657.43	8036.05	7213.3	Quantified					PF16910(Repeating coiled region of VPS13)
A0A1S4E8Q6	A0A1S4E8Q6|A0A1S4E8Q6_DIACI	S	ASPLDPVQEM(+15.99)MYS(+79.97)STVS(+79.97)LK	17	19	Vacuolar protein sorting-associated protein 13-like OS=Diaphorina citri OX=121845 GN=LOC103506922 PE=4 SV=1	Vacuolar protein sorting-associated protein 13-like	LOC103506922	39.08	2257.93	3.5	193	211	M10:Oxidation (M):0.00;S13:Phosphorylation (STY):0.00;S17:Phosphorylation (STY):14.04	S209	MYSSTVSLKKVEM	5494.61	9225.49	4421.51	5657.43	8036.05	7213.3	Quantified					PF16910(Repeating coiled region of VPS13)
A0A1S4E8Q6	A0A1S4E8Q6|A0A1S4E8Q6_DIACI	S	ASPLDPVQEM(+15.99)MYSS(+79.97)T(+79.97)VSLK	14	19	Vacuolar protein sorting-associated protein 13-like OS=Diaphorina citri OX=121845 GN=LOC103506922 PE=4 SV=1	Vacuolar protein sorting-associated protein 13-like	LOC103506922	30.24	2257.93	2.8	193	211	M10:Oxidation (M):0.00;S14:Phosphorylation (STY):0.00;T15:Phosphorylation (STY):0.00	S206	QEMMYSSTVSLKK	5494.61	13067.1	15074.6	3690.25	11729.5	180.164	Quantified					PF16910(Repeating coiled region of VPS13)
A0A1S4E8Q6	A0A1S4E8Q6|A0A1S4E8Q6_DIACI	T	ASPLDPVQEM(+15.99)MYSS(+79.97)T(+79.97)VSLK	15	19	Vacuolar protein sorting-associated protein 13-like OS=Diaphorina citri OX=121845 GN=LOC103506922 PE=4 SV=1	Vacuolar protein sorting-associated protein 13-like	LOC103506922	30.24	2257.93	2.8	193	211	M10:Oxidation (M):0.00;S14:Phosphorylation (STY):0.00;T15:Phosphorylation (STY):0.00	T207	EMMYSSTVSLKKV	5494.61	13067.1	15074.6	3690.25	11729.5	180.164	Quantified					PF16910(Repeating coiled region of VPS13)
A0A1S4E8Q6	A0A1S4E8Q6|A0A1S4E8Q6_DIACI	S	ASPLDPVQEM(+15.99)MYSS(+79.97)TVS(+79.97)LK	14	19	Vacuolar protein sorting-associated protein 13-like OS=Diaphorina citri OX=121845 GN=LOC103506922 PE=4 SV=1	Vacuolar protein sorting-associated protein 13-like	LOC103506922	50.83	2257.93	4.7	193	211	M10:Oxidation (M):7.65;S14:Phosphorylation (STY):7.65;S17:Phosphorylation (STY):26.31	S206	QEMMYSSTVSLKK	72.8435	167.588	4421.51	78.8049	8036.05	7213.3	Quantified					PF16910(Repeating coiled region of VPS13)
A0A1S4E8Q6	A0A1S4E8Q6|A0A1S4E8Q6_DIACI	S	ASPLDPVQEM(+15.99)MYSS(+79.97)TVS(+79.97)LK	17	19	Vacuolar protein sorting-associated protein 13-like OS=Diaphorina citri OX=121845 GN=LOC103506922 PE=4 SV=1	Vacuolar protein sorting-associated protein 13-like	LOC103506922	50.83	2257.93	4.7	193	211	M10:Oxidation (M):7.65;S14:Phosphorylation (STY):7.65;S17:Phosphorylation (STY):26.31	S209	MYSSTVSLKKVEM	72.8435	167.588	4421.51	78.8049	8036.05	7213.3	Quantified					PF16910(Repeating coiled region of VPS13)
A0A1S4E8Q6	A0A1S4E8Q6|A0A1S4E8Q6_DIACI	T	ASPLDPVQEM(+15.99)MYSST(+79.97)VS(+79.97)LK	15	19	Vacuolar protein sorting-associated protein 13-like OS=Diaphorina citri OX=121845 GN=LOC103506922 PE=4 SV=1	Vacuolar protein sorting-associated protein 13-like	LOC103506922	32.13	2257.93	0.2	193	211	M10:Oxidation (M):0.00;T15:Phosphorylation (STY):0.00;S17:Phosphorylation (STY):0.00	T207	EMMYSSTVSLKKV	3283	5037.22	6286.71	4171.06	1497.74	5559.53	Quantified					PF16910(Repeating coiled region of VPS13)
A0A1S4E8Q6	A0A1S4E8Q6|A0A1S4E8Q6_DIACI	S	ASPLDPVQEM(+15.99)MYSST(+79.97)VS(+79.97)LK	17	19	Vacuolar protein sorting-associated protein 13-like OS=Diaphorina citri OX=121845 GN=LOC103506922 PE=4 SV=1	Vacuolar protein sorting-associated protein 13-like	LOC103506922	32.13	2257.93	0.2	193	211	M10:Oxidation (M):0.00;T15:Phosphorylation (STY):0.00;S17:Phosphorylation (STY):0.00	S209	MYSSTVSLKKVEM	3283	5037.22	6286.71	4171.06	1497.74	5559.53	Quantified					PF16910(Repeating coiled region of VPS13)
A0A1S4E8Q6	A0A1S4E8Q6|A0A1S4E8Q6_DIACI	S	ASPLDPVQEM(+15.99)MYSSTVS(+79.97)LK	17	19	Vacuolar protein sorting-associated protein 13-like OS=Diaphorina citri OX=121845 GN=LOC103506922 PE=4 SV=1	Vacuolar protein sorting-associated protein 13-like	LOC103506922	46.14	2177.96	-2.5	193	211	M10:Oxidation (M):10.11;S17:Phosphorylation (STY):0.00	S209	MYSSTVSLKKVEM	228.06	405.42	183.057	1075.81	1968.29	305.665	Quantified					PF16910(Repeating coiled region of VPS13)
A0A1S4E8Q6	A0A1S4E8Q6|A0A1S4E8Q6_DIACI	S	ASPLDPVQEMM(+15.99)YS(+79.97)STVS(+79.97)LK	13	19	Vacuolar protein sorting-associated protein 13-like OS=Diaphorina citri OX=121845 GN=LOC103506922 PE=4 SV=1	Vacuolar protein sorting-associated protein 13-like	LOC103506922	40.73	2257.93	4.7	193	211	M11:Oxidation (M):0.00;S13:Phosphorylation (STY):0.00;S17:Phosphorylation (STY):22.45	S205	VQEMMYSSTVSLK	10443.3	9225.49	3817.54	8305.99	12580.9	269.3	Quantified					PF16910(Repeating coiled region of VPS13)
A0A1S4E8Q6	A0A1S4E8Q6|A0A1S4E8Q6_DIACI	S	ASPLDPVQEMM(+15.99)YS(+79.97)STVS(+79.97)LK	17	19	Vacuolar protein sorting-associated protein 13-like OS=Diaphorina citri OX=121845 GN=LOC103506922 PE=4 SV=1	Vacuolar protein sorting-associated protein 13-like	LOC103506922	40.73	2257.93	4.7	193	211	M11:Oxidation (M):0.00;S13:Phosphorylation (STY):0.00;S17:Phosphorylation (STY):22.45	S209	MYSSTVSLKKVEM	10443.3	9225.49	3817.54	8305.99	12580.9	269.3	Quantified					PF16910(Repeating coiled region of VPS13)
A0A1S4E8Q6	A0A1S4E8Q6|A0A1S4E8Q6_DIACI	S	ASPLDPVQEMM(+15.99)YSS(+79.97)TVS(+79.97)LK	14	19	Vacuolar protein sorting-associated protein 13-like OS=Diaphorina citri OX=121845 GN=LOC103506922 PE=4 SV=1	Vacuolar protein sorting-associated protein 13-like	LOC103506922	37.35	2257.93	3	193	211	M11:Oxidation (M):11.06;S14:Phosphorylation (STY):0.00;S17:Phosphorylation (STY):14.04	S206	QEMMYSSTVSLKK	134.729	1305.83	3687.79	147.735	1497.74	441.424	Quantified					PF16910(Repeating coiled region of VPS13)
A0A1S4E8Q6	A0A1S4E8Q6|A0A1S4E8Q6_DIACI	S	ASPLDPVQEMM(+15.99)YSS(+79.97)TVS(+79.97)LK	17	19	Vacuolar protein sorting-associated protein 13-like OS=Diaphorina citri OX=121845 GN=LOC103506922 PE=4 SV=1	Vacuolar protein sorting-associated protein 13-like	LOC103506922	37.35	2257.93	3	193	211	M11:Oxidation (M):11.06;S14:Phosphorylation (STY):0.00;S17:Phosphorylation (STY):14.04	S209	MYSSTVSLKKVEM	134.729	1305.83	3687.79	147.735	1497.74	441.424	Quantified					PF16910(Repeating coiled region of VPS13)
A0A1S4E8Q6	A0A1S4E8Q6|A0A1S4E8Q6_DIACI	S	ASPLDPVQEMM(+15.99)YSSTVS(+79.97)LK	17	19	Vacuolar protein sorting-associated protein 13-like OS=Diaphorina citri OX=121845 GN=LOC103506922 PE=4 SV=1	Vacuolar protein sorting-associated protein 13-like	LOC103506922	50.83	2177.96	5.8	193	211	M11:Oxidation (M):8.69;S17:Phosphorylation (STY):28.86	S209	MYSSTVSLKKVEM	355.63	501.304	652.164		109.465	410.465	Quantified					PF16910(Repeating coiled region of VPS13)
A0A1S4E8Q6	A0A1S4E8Q6|A0A1S4E8Q6_DIACI	Y	ASPLDPVQEMMY(+79.97)SSTVS(+79.97)LK	12	19	Vacuolar protein sorting-associated protein 13-like OS=Diaphorina citri OX=121845 GN=LOC103506922 PE=4 SV=1	Vacuolar protein sorting-associated protein 13-like	LOC103506922	48.98	2241.93	0	193	211	Y12:Phosphorylation (STY):0.00;S17:Phosphorylation (STY):11.10	Y204	PVQEMMYSSTVSL	9285.89	28895.7	31381.8	7766.98	1153.38	23047	Quantified					PF16910(Repeating coiled region of VPS13)
A0A1S4E8Q6	A0A1S4E8Q6|A0A1S4E8Q6_DIACI	S	ASPLDPVQEMMY(+79.97)SSTVS(+79.97)LK	17	19	Vacuolar protein sorting-associated protein 13-like OS=Diaphorina citri OX=121845 GN=LOC103506922 PE=4 SV=1	Vacuolar protein sorting-associated protein 13-like	LOC103506922	48.98	2241.93	0	193	211	Y12:Phosphorylation (STY):0.00;S17:Phosphorylation (STY):11.10	S209	MYSSTVSLKKVEM	9285.89	28895.7	31381.8	7766.98	1153.38	23047	Quantified					PF16910(Repeating coiled region of VPS13)
A0A1S4E8Q6	A0A1S4E8Q6|A0A1S4E8Q6_DIACI	Y	ASPLDPVQEMMY(+79.97)SSTVS(+79.97)LKK	12	20	Vacuolar protein sorting-associated protein 13-like OS=Diaphorina citri OX=121845 GN=LOC103506922 PE=4 SV=1	Vacuolar protein sorting-associated protein 13-like	LOC103506922	35.87	2370.03	-0.5	193	212	Y12:Phosphorylation (STY):0.00;S17:Phosphorylation (STY):26.31	Y204	PVQEMMYSSTVSL	3306.55	15170.5	10531.5	455.959	9248.07	4399.61	Quantified					PF16910(Repeating coiled region of VPS13)
A0A1S4E8Q6	A0A1S4E8Q6|A0A1S4E8Q6_DIACI	S	ASPLDPVQEMMY(+79.97)SSTVS(+79.97)LKK	17	20	Vacuolar protein sorting-associated protein 13-like OS=Diaphorina citri OX=121845 GN=LOC103506922 PE=4 SV=1	Vacuolar protein sorting-associated protein 13-like	LOC103506922	35.87	2370.03	-0.5	193	212	Y12:Phosphorylation (STY):0.00;S17:Phosphorylation (STY):26.31	S209	MYSSTVSLKKVEM	3306.55	15170.5	10531.5	455.959	9248.07	4399.61	Quantified					PF16910(Repeating coiled region of VPS13)
A0A1S4E8Q6	A0A1S4E8Q6|A0A1S4E8Q6_DIACI	S	ASPLDPVQEMMYS(+79.97)STVS(+79.97)LK	13	19	Vacuolar protein sorting-associated protein 13-like OS=Diaphorina citri OX=121845 GN=LOC103506922 PE=4 SV=1	Vacuolar protein sorting-associated protein 13-like	LOC103506922	44.8	2241.93	0.3	193	211	S13:Phosphorylation (STY):0.00;S17:Phosphorylation (STY):0.00	S205	VQEMMYSSTVSLK	1243.32	6360.25	633.197	2359.21	24556.7	2863.8	Quantified					PF16910(Repeating coiled region of VPS13)
A0A1S4E8Q6	A0A1S4E8Q6|A0A1S4E8Q6_DIACI	S	ASPLDPVQEMMYS(+79.97)STVS(+79.97)LK	17	19	Vacuolar protein sorting-associated protein 13-like OS=Diaphorina citri OX=121845 GN=LOC103506922 PE=4 SV=1	Vacuolar protein sorting-associated protein 13-like	LOC103506922	44.8	2241.93	0.3	193	211	S13:Phosphorylation (STY):0.00;S17:Phosphorylation (STY):0.00	S209	MYSSTVSLKKVEM	1243.32	6360.25	633.197	2359.21	24556.7	2863.8	Quantified					PF16910(Repeating coiled region of VPS13)
A0A1S4E8Q6	A0A1S4E8Q6|A0A1S4E8Q6_DIACI	S	ASPLDPVQEMMYS(+79.97)STVSLK	13	19	Vacuolar protein sorting-associated protein 13-like OS=Diaphorina citri OX=121845 GN=LOC103506922 PE=4 SV=1	Vacuolar protein sorting-associated protein 13-like	LOC103506922	42.92	2161.97	4.2	193	211	S13:Phosphorylation (STY):0.00	S205	VQEMMYSSTVSLK	3081.6	6157.36	698.257	3832.12	2517.11	2896.08	Quantified					PF16910(Repeating coiled region of VPS13)
A0A1S4E8Q6	A0A1S4E8Q6|A0A1S4E8Q6_DIACI	S	ASPLDPVQEMMYSS(+79.97)T(+79.97)VSLK	14	19	Vacuolar protein sorting-associated protein 13-like OS=Diaphorina citri OX=121845 GN=LOC103506922 PE=4 SV=1	Vacuolar protein sorting-associated protein 13-like	LOC103506922	42.34	2241.93	-1.7	193	211	S14:Phosphorylation (STY):3.29;T15:Phosphorylation (STY):0.00	S206	QEMMYSSTVSLKK	9285.89	6360.25	804.414	151.713	33639.1	134.458	Quantified					PF16910(Repeating coiled region of VPS13)
A0A1S4E8Q6	A0A1S4E8Q6|A0A1S4E8Q6_DIACI	T	ASPLDPVQEMMYSS(+79.97)T(+79.97)VSLK	15	19	Vacuolar protein sorting-associated protein 13-like OS=Diaphorina citri OX=121845 GN=LOC103506922 PE=4 SV=1	Vacuolar protein sorting-associated protein 13-like	LOC103506922	42.34	2241.93	-1.7	193	211	S14:Phosphorylation (STY):3.29;T15:Phosphorylation (STY):0.00	T207	EMMYSSTVSLKKV	9285.89	6360.25	804.414	151.713	33639.1	134.458	Quantified					PF16910(Repeating coiled region of VPS13)
A0A1S4E8Q6	A0A1S4E8Q6|A0A1S4E8Q6_DIACI	S	ASPLDPVQEMMYSS(+79.97)TVS(+79.97)LK	14	19	Vacuolar protein sorting-associated protein 13-like OS=Diaphorina citri OX=121845 GN=LOC103506922 PE=4 SV=1	Vacuolar protein sorting-associated protein 13-like	LOC103506922	56.44	2241.93	0	193	211	S14:Phosphorylation (STY):7.65;S17:Phosphorylation (STY):5.03	S206	QEMMYSSTVSLKK	4790.72	28895.7	31381.8	2359.21	24556.7	23047	Quantified					PF16910(Repeating coiled region of VPS13)
A0A1S4E8Q6	A0A1S4E8Q6|A0A1S4E8Q6_DIACI	S	ASPLDPVQEMMYSS(+79.97)TVS(+79.97)LK	17	19	Vacuolar protein sorting-associated protein 13-like OS=Diaphorina citri OX=121845 GN=LOC103506922 PE=4 SV=1	Vacuolar protein sorting-associated protein 13-like	LOC103506922	56.44	2241.93	0	193	211	S14:Phosphorylation (STY):7.65;S17:Phosphorylation (STY):5.03	S209	MYSSTVSLKKVEM	4790.72	28895.7	31381.8	2359.21	24556.7	23047	Quantified					PF16910(Repeating coiled region of VPS13)
A0A1S4E8Q6	A0A1S4E8Q6|A0A1S4E8Q6_DIACI	S	ASPLDPVQEMMYSS(+79.97)TVSLK	14	19	Vacuolar protein sorting-associated protein 13-like OS=Diaphorina citri OX=121845 GN=LOC103506922 PE=4 SV=1	Vacuolar protein sorting-associated protein 13-like	LOC103506922	35.89	2161.97	5.9	193	211	S14:Phosphorylation (STY):0.00	S206	QEMMYSSTVSLKK	3081.6	6157.36	7142.42	232.2	1047.13	714.711	Quantified					PF16910(Repeating coiled region of VPS13)
A0A1S4E8Q6	A0A1S4E8Q6|A0A1S4E8Q6_DIACI	T	ASPLDPVQEMMYSST(+79.97)VS(+79.97)LK	15	19	Vacuolar protein sorting-associated protein 13-like OS=Diaphorina citri OX=121845 GN=LOC103506922 PE=4 SV=1	Vacuolar protein sorting-associated protein 13-like	LOC103506922	47.88	2241.93	2.1	193	211	T15:Phosphorylation (STY):0.00;S17:Phosphorylation (STY):9.42	T207	EMMYSSTVSLKKV	4790.72	1507.19	364.174	6623.33	33639.1	2017.21	Quantified					PF16910(Repeating coiled region of VPS13)
A0A1S4E8Q6	A0A1S4E8Q6|A0A1S4E8Q6_DIACI	S	ASPLDPVQEMMYSST(+79.97)VS(+79.97)LK	17	19	Vacuolar protein sorting-associated protein 13-like OS=Diaphorina citri OX=121845 GN=LOC103506922 PE=4 SV=1	Vacuolar protein sorting-associated protein 13-like	LOC103506922	47.88	2241.93	2.1	193	211	T15:Phosphorylation (STY):0.00;S17:Phosphorylation (STY):9.42	S209	MYSSTVSLKKVEM	4790.72	1507.19	364.174	6623.33	33639.1	2017.21	Quantified					PF16910(Repeating coiled region of VPS13)
A0A1S4E8Q6	A0A1S4E8Q6|A0A1S4E8Q6_DIACI	T	ASPLDPVQEMMYSST(+79.97)VS(+79.97)LKK	15	20	Vacuolar protein sorting-associated protein 13-like OS=Diaphorina citri OX=121845 GN=LOC103506922 PE=4 SV=1	Vacuolar protein sorting-associated protein 13-like	LOC103506922	52.55	2370.03	0.8	193	212	T15:Phosphorylation (STY):0.00;S17:Phosphorylation (STY):11.12	T207	EMMYSSTVSLKKV	1979.94	15170.5	10531.5	1131.57	1332.56	2278.21	Quantified					PF16910(Repeating coiled region of VPS13)
A0A1S4E8Q6	A0A1S4E8Q6|A0A1S4E8Q6_DIACI	S	ASPLDPVQEMMYSST(+79.97)VS(+79.97)LKK	17	20	Vacuolar protein sorting-associated protein 13-like OS=Diaphorina citri OX=121845 GN=LOC103506922 PE=4 SV=1	Vacuolar protein sorting-associated protein 13-like	LOC103506922	52.55	2370.03	0.8	193	212	T15:Phosphorylation (STY):0.00;S17:Phosphorylation (STY):11.12	S209	MYSSTVSLKKVEM	1979.94	15170.5	10531.5	1131.57	1332.56	2278.21	Quantified					PF16910(Repeating coiled region of VPS13)
A0A1S4E8Q6	A0A1S4E8Q6|A0A1S4E8Q6_DIACI	T	ASPLDPVQEMMYSST(+79.97)VSLK	15	19	Vacuolar protein sorting-associated protein 13-like OS=Diaphorina citri OX=121845 GN=LOC103506922 PE=4 SV=1	Vacuolar protein sorting-associated protein 13-like	LOC103506922	47.87	2161.97	2.6	193	211	T15:Phosphorylation (STY):0.00	T207	EMMYSSTVSLKKV	1202.77	67.7435	4795.02	491.769	11578.7	3038.95	Quantified					PF16910(Repeating coiled region of VPS13)
A0A1S4E8Q6	A0A1S4E8Q6|A0A1S4E8Q6_DIACI	S	ASPLDPVQEMMYSSTVS(+79.97)LK	17	19	Vacuolar protein sorting-associated protein 13-like OS=Diaphorina citri OX=121845 GN=LOC103506922 PE=4 SV=1	Vacuolar protein sorting-associated protein 13-like	LOC103506922	56.91	2161.97	1.6	193	211	S17:Phosphorylation (STY):12.81	S209	MYSSTVSLKKVEM	1202.77	12032.6	4795.02	619.878	11578.7	3038.95	Quantified					PF16910(Repeating coiled region of VPS13)
A0A3Q0IWB1	A0A3Q0IWB1|A0A3Q0IWB1_DIACI	S	ASQSKPVS(+79.97)PISS(+79.97)PPVLK	8	17	F-actin-monooxygenase Mical OS=Diaphorina citri OX=121845 GN=LOC103510788 PE=4 SV=1	F-actin-monooxygenase Mical	LOC103510788	29.33	1880.9	3.6	747	763	S8:Phosphorylation (STY):12.33;S12:Phosphorylation (STY):0.00	S754	SQSKPVSPISSPP	160.481	164.848	77.9578	106.413	29.5336	92.7058	Quantified	GO:0004497(MF:monooxygenase activity)				PF00307(Calponin homology (CH) domain)
A0A3Q0IWB1	A0A3Q0IWB1|A0A3Q0IWB1_DIACI	S	ASQSKPVS(+79.97)PISS(+79.97)PPVLK	12	17	F-actin-monooxygenase Mical OS=Diaphorina citri OX=121845 GN=LOC103510788 PE=4 SV=1	F-actin-monooxygenase Mical	LOC103510788	29.33	1880.9	3.6	747	763	S8:Phosphorylation (STY):12.33;S12:Phosphorylation (STY):0.00	S758	PVSPISSPPVLKK	160.481	164.848	77.9578	106.413	29.5336	92.7058	Quantified	GO:0004497(MF:monooxygenase activity)				PF00307(Calponin homology (CH) domain)
A0A3Q0J213	A0A3Q0J213|A0A3Q0J213_DIACI	S	ASS(+79.97)ADAGVIITDPNIAR	3	17	Rho GTPase-activating protein 92B OS=Diaphorina citri OX=121845 GN=LOC103511419 PE=4 SV=1	Rho GTPase-activating protein 92B	LOC103511419	79.63	1749.83	2.2	229	245	S3:Phosphorylation (STY):0.00	S231	GHSRASSADAGVI	16238.6	30402.7	23164.9	27197.2	16507.5	17338.4	Quantified	GO:0007165(BP:signal transduction)				PF00620(RhoGAP domain)
A0A3Q0JC64	A0A3Q0JC64|A0A3Q0JC64_DIACI	S	ASS(+79.97)C(+57.02)PDIYR	3	9	Uncharacterized protein LOC103518815 OS=Diaphorina citri OX=121845 GN=LOC103518815 PE=4 SV=1	Uncharacterized protein LOC103518815	LOC103518815	42.5	1147.44	-1.1	462	470	S3:Phosphorylation (STY):10.11;C4:Carbamidomethylation:1000.00	S464	YRLRASSCPDIYR	1762.55	146.878	1759.26	2225.04	580.39	2650.09	Quantified	GO:0016021(CC:integral component of membrane);GO:0022857(MF:transmembrane transporter activity)			Membrane;Multi-pass membrane protein	PF07690(Major Facilitator Superfamily)
A0A3Q0ISZ0	A0A3Q0ISZ0|A0A3Q0ISZ0_DIACI	S	ASS(+79.97)C(+57.02)PNIFR	3	9	Uncharacterized protein LOC103509204 OS=Diaphorina citri OX=121845 GN=LOC103509204 PE=4 SV=1	Uncharacterized protein LOC103509204	LOC103509204	35.06	1130.46	-3	610	618	S3:Phosphorylation (STY):0.00;C4:Carbamidomethylation:1000.00	S612	YKLRASSCPNIFR	362.965	1798.37	2836.85	634.516	446.397	1223.72	Quantified	GO:0016021(CC:integral component of membrane);GO:0022857(MF:transmembrane transporter activity)			Membrane;Multi-pass membrane protein	PF07690(Major Facilitator Superfamily)
A0A3Q0J130	A0A3Q0J130|A0A3Q0J130_DIACI:A0A1S4ED83|A0A1S4ED83_DIACI	S	ASS(+79.97)EEDYSVVK	3	11	Zinc transporter ZIP10 isoform X3 OS=Diaphorina citri OX=121845 GN=LOC103510573 PE=4 SV=1	Zinc transporter ZIP10 isoform X3	LOC103510573	63.75	1292.52	-4.7	318	328	S3:Phosphorylation (STY):8.14	S320	KMERASSEEDYSV	3184.59	1362.21	2566.98	8712.71	3364.04	6399.59	Quantified	GO:0016021(CC:integral component of membrane);GO:0046873(MF:metal ion transmembrane transporter activity)			Membrane;Multi-pass membrane protein	PF02535(ZIP Zinc transporter)
A0A3Q0J125	A0A3Q0J125|A0A3Q0J125_DIACI	S	ASS(+79.97)EPLAYVAVATESASASAK	3	21	Cytochrome b-c1 complex subunit 2, mitochondrial OS=Diaphorina citri OX=121845 GN=LOC103510564 PE=4 SV=1	Cytochrome b-c1 complex subunit 2, mitochondrial	LOC103510564	52.53	2088.96	5.8	209	229	S3:Phosphorylation (STY):0.00	S211	ELRKASSEPLAYV	249.146	2276.31	967.037		1353.45	446.379	Quantified	GO:0003824(MF:catalytic activity);GO:0046872(MF:metal ion binding)	K00415(NA)	ko00190(Oxidative phosphorylation)		PF00675(Insulinase (Peptidase family M16));PF05193(Peptidase M16 inactive domain)
A0A1S4E7J1	A0A1S4E7J1|A0A1S4E7J1_DIACI	S	ASS(+79.97)IETQTLPAQSGK	3	15	WASH complex subunit 2 OS=Diaphorina citri OX=121845 GN=LOC103505989 PE=4 SV=1	WASH complex subunit 2	LOC103505989	42.89	1596.74	-7	1300	1314	S3:Phosphorylation (STY):0.00	S1302	KIGRASSIETQTL	1871	2781.9	1362.48	788.879	1043	1271.75	Quantified	GO:0005634(CC:nucleus);GO:0003713(MF:transcription coactivator activity)				PF13820(Putative nucleic acid-binding region)
A0A1S4ECD8	A0A1S4ECD8|A0A1S4ECD8_DIACI	S	ASS(+79.97)IPTLSGSGLRPR	3	15	Mucin-1-like isoform X3 OS=Diaphorina citri OX=121845 GN=LOC103509848 PE=4 SV=1	Mucin-1-like isoform X3	LOC103509848	44.29	1577.79	9.8	179	193	S3:Phosphorylation (STY):11.06	S181	SIHRASSIPTLSG	3488.79	5388.04	1273.83	1035.66	1863.32	1163.67	Quantified
A0A3Q0J6A5	A0A3Q0J6A5|A0A3Q0J6A5_DIACI	S	ASS(+79.97)LAAPSFVDEIR	3	14	LOW QUALITY PROTEIN: dmX-like protein 1 OS=Diaphorina citri OX=121845 GN=LOC103513612 PE=4 SV=1	LOW QUALITY PROTEIN: dmX-like protein 1	LOC103513612	55.01	1541.71	-0.1	975	988	S3:Phosphorylation (STY):10.11	S977	ILRKASSLAAPSF	807.564	604.487	409.508	294.12	339.742	108.5	Quantified					PF12234(RAVE protein 1 C terminal)
A0A3Q0JKA0	A0A3Q0JKA0|A0A3Q0JKA0_DIACI	S	ASS(+79.97)NPQWQPLVLVIPLR	3	17	Cysteine protease OS=Diaphorina citri OX=121845 GN=LOC103520402 PE=3 SV=1	Cysteine protease	LOC103520402	52.28	1997.05	11.3	114	130	S3:Phosphorylation (STY):0.00	S116	TNKRASSNPQWQP	169.112	251.126			276.459		Quantified	GO:0006914(BP:autophagy);GO:0015031(BP:protein transport);GO:0005737(CC:cytoplasm);GO:0004197(MF:cysteine-type endopeptidase activity)			Cytoplasm	PF03416(Peptidase family C54)
A0A1S3DFQ7	A0A1S3DFQ7|A0A1S3DFQ7_DIACI	S	ASS(+79.97)PTSLSEER	3	11	Uncharacterized protein OS=Diaphorina citri OX=121845 GN=LOC103516881 PE=4 SV=1	Uncharacterized protein	LOC103516881	43.35	1242.51	0	93	103	S3:Phosphorylation (STY):12.28	S95	GGRRASSPTSLSE	2583.1	380.141	1631.16	2077.07	1133.94	186.587	Quantified
A0A3Q0J0U5	A0A3Q0J0U5|A0A3Q0J0U5_DIACI	S	ASS(+79.97)VSIEEADRR	3	12	Probable oligoribonuclease OS=Diaphorina citri OX=121845 GN=LOC103510515 PE=4 SV=1	Probable oligoribonuclease	LOC103510515	28.63	1398.61	2.9	29	40	S3:Phosphorylation (STY):0.00	S31	DRVRASSVSIEEA	810.346	947.704	658.005	802.622	988.954	852.578	Quantified	GO:0003676(MF:nucleic acid binding)	K13288(NA)	ko03008(Ribosome biogenesis in eukaryotes)
A0A3Q0J6Z3	A0A3Q0J6Z3|A0A3Q0J6Z3_DIACI:A0A3Q0J6A6|A0A3Q0J6A6_DIACI:A0A3Q0IZQ4|A0A3Q0IZQ4_DIACI	S	ASSAIPS(+79.97)TPSK	7	11	Vitellogenin-A1-like OS=Diaphorina citri OX=121845 GN=LOC103513507 PE=4 SV=1	Vitellogenin-A1-like	LOC103513507	54.75	1124.51	-0.8	276	286	S7:Phosphorylation (STY):0.00	S282	ASSAIPSTPSKNG	2376.54	1279.57	1311.7	77051	69.9656	13727.7	Quantified	GO:0005319(MF:lipid transporter activity)				PF01347(Lipoprotein amino terminal region)
A0A3Q0J6Z3	A0A3Q0J6Z3|A0A3Q0J6Z3_DIACI:A0A3Q0J6A6|A0A3Q0J6A6_DIACI:A0A3Q0IZQ4|A0A3Q0IZQ4_DIACI	T	ASSAIPST(+79.97)PSK	8	11	Vitellogenin-A1-like OS=Diaphorina citri OX=121845 GN=LOC103513507 PE=4 SV=1	Vitellogenin-A1-like	LOC103513507	52.59	1124.51	-2.1	276	286	T8:Phosphorylation (STY):0.00	T283	SSAIPSTPSKNGA	14476.7	98.5076	45952.3	9547.15	4686.52	288.231	Quantified	GO:0005319(MF:lipid transporter activity)				PF01347(Lipoprotein amino terminal region)
A0A3Q0J6Z3	A0A3Q0J6Z3|A0A3Q0J6Z3_DIACI:A0A3Q0J6A6|A0A3Q0J6A6_DIACI:A0A3Q0IZQ4|A0A3Q0IZQ4_DIACI	S	ASSAIPSTPS(+79.97)K	10	11	Vitellogenin-A1-like OS=Diaphorina citri OX=121845 GN=LOC103513507 PE=4 SV=1	Vitellogenin-A1-like	LOC103513507	54.23	1124.51	-3.6	276	286	S10:Phosphorylation (STY):7.77	S285	AIPSTPSKNGAEK	14476.7	8748.09	257.642	9547.15	4686.52	13727.7	Quantified	GO:0005319(MF:lipid transporter activity)				PF01347(Lipoprotein amino terminal region)
A0A3Q0IPJ2	A0A3Q0IPJ2|A0A3Q0IPJ2_DIACI	S	ASSS(+79.97)GEIQVR	4	10	LOW QUALITY PROTEIN: obscurin-like OS=Diaphorina citri OX=121845 GN=LOC103507575 PE=3 SV=1	LOW QUALITY PROTEIN: obscurin-like	LOC103507575	56.8	1112.49	-3.6	4297	4306	S4:Phosphorylation (STY):11.06	S4300	HGKASSSGEIQVR	7982.48	167.432	5198.79	8682.11	10051.7	7592.1	Quantified	GO:0005524(MF:ATP binding);GO:0005085(MF:guanyl-nucleotide exchange factor activity);GO:0004672(MF:protein kinase activity)				PF00621(RhoGEF domain);PF00069(Protein kinase domain);PF00041(Fibronectin type III domain);PF07679(Immunoglobulin I-set domain)
A0A3Q0JJ87	A0A3Q0JJ87|A0A3Q0JJ87_DIACI	T	AST(+79.97)TPSTPTEFK	3	12	Nuclear protein localization protein 4 homolog OS=Diaphorina citri OX=121845 GN=LOC113472850 PE=4 SV=1	Nuclear protein localization protein 4 homolog	LOC113472850	32.71	1345.58	-4.9	105	116	T3:Phosphorylation (STY):0.00	T107	TKKKASTTPSTPT	1266.35	1113.22	888.37	3121.26	1397.98	2012.07	Quantified					PF11543(Nuclear pore localisation protein NPL4);PF05020(NPL4 family, putative zinc binding region)
A0A1S3D4Y3	A0A1S3D4Y3|A0A1S3D4Y3_DIACI	S	ASTQPTPAKPVS(+79.97)PVK	12	15	LOW QUALITY PROTEIN: zinc finger protein 234-like OS=Diaphorina citri OX=121845 GN=LOC103511584 PE=4 SV=2	LOW QUALITY PROTEIN: zinc finger protein 234-like	LOC103511584	38.68	1586.81	3.6	133	147	S12:Phosphorylation (STY):28.13	S144	TPAKPVSPVKTQS	721.596	440.591	170.377	617.981	716.562	224.83	Quantified	GO:0003676(MF:nucleic acid binding)				PF00096(Zinc finger, C2H2 type)
A0A3Q0JJ87	A0A3Q0JJ87|A0A3Q0JJ87_DIACI	T	ASTTPST(+79.97)PTEFK	7	12	Nuclear protein localization protein 4 homolog OS=Diaphorina citri OX=121845 GN=LOC113472850 PE=4 SV=1	Nuclear protein localization protein 4 homolog	LOC113472850	40.05	1345.58	-1.9	105	116	T7:Phosphorylation (STY):11.06	T111	ASTTPSTPTEFKS	1266.35	795.528	1919.71	4459.27	2767.57	2674.73	Quantified					PF11543(Nuclear pore localisation protein NPL4);PF05020(NPL4 family, putative zinc binding region)
A0A3Q0JJ87	A0A3Q0JJ87|A0A3Q0JJ87_DIACI	T	ASTTPSTPT(+79.97)EFK	9	12	Nuclear protein localization protein 4 homolog OS=Diaphorina citri OX=121845 GN=LOC113472850 PE=4 SV=1	Nuclear protein localization protein 4 homolog	LOC113472850	35.17	1345.58	-2.4	105	116	T9:Phosphorylation (STY):0.00	T113	TTPSTPTEFKSKL	2688.49	1085.68	2582.99	3121.26	3516.89	2012.07	Quantified					PF11543(Nuclear pore localisation protein NPL4);PF05020(NPL4 family, putative zinc binding region)
A0A3Q0J321	A0A3Q0J321|A0A3Q0J321_DIACI	S	ASVDTVAHSAQEIIHNAS(+79.97)NPR	18	21	LOW QUALITY PROTEIN: microtubule-actin cross-linking factor 1, isoforms 1/2/3/5 OS=Diaphorina citri OX=121845 GN=LOC103512109 PE=4 SV=1	LOW QUALITY PROTEIN: microtubule-actin cross-linking factor 1, isoforms 1/2/3/5	LOC103512109	28.34	2296.06	-0.3	4875	4895	S18:Phosphorylation (STY):13.05	S4892	EIIHNASNPRLAK	70.9646	226.415	354.745	520.455	2458.81	789.856	Quantified	GO:0045104(BP:intermediate filament cytoskeleton organization);GO:0005856(CC:cytoskeleton)				PF00307(Calponin homology (CH) domain);PF00435(Spectrin repeat)
A0A3Q0INZ4	A0A3Q0INZ4|A0A3Q0INZ4_DIACI	T	ASVEKPPT(+79.97)PAAVK	8	13	Eukaryotic translation initiation factor 4 gamma 3-like OS=Diaphorina citri OX=121845 GN=LOC103524978 PE=4 SV=1	Eukaryotic translation initiation factor 4 gamma 3-like	LOC103524978	49.28	1373.7	-11.6	296	308	T8:Phosphorylation (STY):62.39	T303	SVEKPPTPAAVKN	1062.54	2509.42	1849.22	708.251	1018.18	1762.54	Quantified	GO:0003743(MF:translation initiation factor activity)				PF02854(MIF4G domain)
A0A1S4EJU2	A0A1S4EJU2|A0A1S4EJU2_DIACI:A0A3Q0IV54|A0A3Q0IV54_DIACI	Y	ASY(+79.97)FGFFDTAK	3	11	ADP/ATP translocase OS=Diaphorina citri OX=121845 GN=LOC103516169 PE=3 SV=1	ADP/ATP translocase	LOC103516169	59.5	1332.54	-6.4	189	199	Y3:Phosphorylation (STY):8.14	Y191	IIYRASYFGFFDT	845.278	730.381	1249.67	200.497	409.971	945.332	Quantified	GO:0016021(CC:integral component of membrane);GO:0005743(CC:mitochondrial inner membrane);GO:0005347(MF:ATP transmembrane transporter activity)	K05863(NA)	ko04020(Calcium signaling pathway);ko04022(cGMP-PKG signaling pathway);ko04217(Necroptosis);ko04218(Cellular senescence)	Membrane;Multi-pass membrane protein	PF00153(Mitochondrial carrier protein)
A0A3Q0J343	A0A3Q0J343|A0A3Q0J343_DIACI	T	AT(+79.97)LGEADKEYNSIVNLVR	2	18	Alpha-actinin, sarcomeric OS=Diaphorina citri OX=121845 GN=LOC103514051 PE=4 SV=1	Alpha-actinin, sarcomeric	LOC103514051	34.83	2071	1.2	263	280	T2:Phosphorylation (STY):6.04	T264	HSQFKATLGEADK	2472.7	1858.98	916.523	2916.67	186.119	5594.87	Quantified	GO:0051764(BP:actin crosslink formation);GO:0051017(BP:actin filament bundle assembly);GO:0051015(MF:actin filament binding);GO:0005509(MF:calcium ion binding)	K05699(NA)	ko04510(Focal adhesion);ko04520(Adherens junction);ko04530(Tight junction);ko04810(Regulation of actin cytoskeleton)		PF00435(Spectrin repeat);PF08726(Ca2+ insensitive EF hand)
A0A1S3D367	A0A1S3D367|A0A1S3D367_DIACI	T	AT(+79.97)NVKLTPPPPTLPTPPT(+79.97)PTPTSPK	2	25	Cytoplasmic phosphatidylinositol transfer protein 1 OS=Diaphorina citri OX=121845 GN=LOC103510487 PE=4 SV=1	Cytoplasmic phosphatidylinositol transfer protein 1	LOC103510487	27.15	2709.34	1	246	270	T2:Phosphorylation (STY):0.00;T18:Phosphorylation (STY):5.03	T247	GEMQRATNVKLTP	252.943	288.926	363.44	1081.78	452.415	1294.23	Quantified	GO:0005548(MF:phospholipid transporter activity)				PF02121(Phosphatidylinositol transfer protein)
A0A1S3D367	A0A1S3D367|A0A1S3D367_DIACI	T	AT(+79.97)NVKLTPPPPTLPTPPT(+79.97)PTPTSPK	18	25	Cytoplasmic phosphatidylinositol transfer protein 1 OS=Diaphorina citri OX=121845 GN=LOC103510487 PE=4 SV=1	Cytoplasmic phosphatidylinositol transfer protein 1	LOC103510487	27.15	2709.34	1	246	270	T2:Phosphorylation (STY):0.00;T18:Phosphorylation (STY):5.03	T263	TLPTPPTPTPTSP	252.943	288.926	363.44	1081.78	452.415	1294.23	Quantified	GO:0005548(MF:phospholipid transporter activity)				PF02121(Phosphatidylinositol transfer protein)
A0A3Q0IPJ2	A0A3Q0IPJ2|A0A3Q0IPJ2_DIACI	T	AT(+79.97)PEDDGDSLDLELEK	2	16	LOW QUALITY PROTEIN: obscurin-like OS=Diaphorina citri OX=121845 GN=LOC103507575 PE=3 SV=1	LOW QUALITY PROTEIN: obscurin-like	LOC103507575	40.07	1825.75	2.5	2166	2181	T2:Phosphorylation (STY):26.08	T2167	RKYSKATPEDDGD	253.535	321.718	247.958	796.791	304.998	750.744	Quantified	GO:0005524(MF:ATP binding);GO:0005085(MF:guanyl-nucleotide exchange factor activity);GO:0004672(MF:protein kinase activity)				PF00621(RhoGEF domain);PF00069(Protein kinase domain);PF00041(Fibronectin type III domain);PF07679(Immunoglobulin I-set domain)
A0A3Q0J5R5	A0A3Q0J5R5|A0A3Q0J5R5_DIACI	T	AT(+79.97)PPPSLTGDPILGTHK	2	17	TOM1-like protein 2 isoform X1 OS=Diaphorina citri OX=121845 GN=LOC103512928 PE=3 SV=1	TOM1-like protein 2 isoform X1	LOC103512928	26.58	1780.88	3.1	401	417	T2:Phosphorylation (STY):33.81	T402	FNKAKATPPPSLT	618.887	1943.52	889.591	605.681	694.208	135.424	Quantified	GO:0006886(BP:intracellular protein transport)				PF00790(VHS domain);PF03127(GAT domain)
A0A3Q0IRW1	A0A3Q0IRW1|A0A3Q0IRW1_DIACI	T	AT(+79.97)SLNHSYEVSAETK	2	15	Uncharacterized protein LOC103506518 OS=Diaphorina citri OX=121845 GN=LOC103506518 PE=4 SV=1	Uncharacterized protein LOC103506518	LOC103506518	34.78	1715.74	2.6	22	36	T2:Phosphorylation (STY):0.00	T23	TSDHKATSLNHSY	3576.33	3215.93	2997.55	1090.87	2194.14	2589.51	Quantified	GO:0016021(CC:integral component of membrane)				PF01390(SEA domain)
A0A1S4EID2	A0A1S4EID2|A0A1S4EID2_DIACI	T	AT(+79.97)SNVFAM(+15.99)FDQAQIQNFK	2	18	Myosin regulatory light chain sqh OS=Diaphorina citri OX=121845 GN=LOC103515046 PE=4 SV=1	Myosin regulatory light chain sqh	LOC103515046	63.97	2154.94	1.7	20	37	T2:Phosphorylation (STY):0.00;M8:Oxidation (M):1000.00	T21	KRAQRATSNVFAM	19858.3	19634.2	14875.5	264.003	5415.39	2264.75	Quantified	GO:0005509(MF:calcium ion binding)	K12757(NA)	ko04510(Focal adhesion);ko04520(Adherens junction);ko04530(Tight junction);ko04810(Regulation of actin cytoskeleton);ko04814(Motor proteins)		PF13405(EF-hand domain)
A0A1S4EID2	A0A1S4EID2|A0A1S4EID2_DIACI	T	AT(+79.97)SNVFAMFDQAQIQNFK	2	18	Myosin regulatory light chain sqh OS=Diaphorina citri OX=121845 GN=LOC103515046 PE=4 SV=1	Myosin regulatory light chain sqh	LOC103515046	71.82	2138.95	2.8	20	37	T2:Phosphorylation (STY):0.00	T21	KRAQRATSNVFAM	42170.9	1503.56	37031.1	69.8566	17162.3	8209.24	Quantified	GO:0005509(MF:calcium ion binding)	K12757(NA)	ko04510(Focal adhesion);ko04520(Adherens junction);ko04530(Tight junction);ko04810(Regulation of actin cytoskeleton);ko04814(Motor proteins)		PF13405(EF-hand domain)
A0A3Q0J6R4	A0A3Q0J6R4|A0A3Q0J6R4_DIACI:A0A1S4EJE7|A0A1S4EJE7_DIACI	T	AT(+79.97)SPEETEDLSPLPSQGQQSAR	2	22	cAMP-dependent protein kinase type I regulatory subunit-like OS=Diaphorina citri OX=121845 GN=LOC113470128 PE=4 SV=1	cAMP-dependent protein kinase type I regulatory subunit-like	LOC113470128	63.26	2407.05	0	11	32	T2:Phosphorylation (STY):0.00	T12	DAKLKATSPEETE	13155	28486.1	22747.3	20590.7	18264.8	13841.6	Quantified	GO:0001932(BP:regulation of protein phosphorylation);GO:0000166(MF:nucleotide binding)
A0A3Q0JGD4	A0A3Q0JGD4|A0A3Q0JGD4_DIACI	T	AT(+79.97)SPSPPSNSVFLR	2	14	Serine/arginine repetitive matrix protein 1-like OS=Diaphorina citri OX=121845 GN=LOC103520687 PE=4 SV=1	Serine/arginine repetitive matrix protein 1-like	LOC103520687	45.91	1538.71	-14.7	190	203	T2:Phosphorylation (STY):0.00	T191	KMVTRATSPSPPS	5592.17	523.491	1350.64	4853.38	5003.17	2836.56	Quantified
A0A3Q0IX48	A0A3Q0IX48|A0A3Q0IX48_DIACI	T	AT(+79.97)SPYDADES(+79.97)DPEELPSVYPR	2	21	LOW QUALITY PROTEIN: Golgi-specific brefeldin A-resistance guanine nucleotide exchange factor 1-like OS=Diaphorina citri OX=121845 GN=LOC103511171 PE=4 SV=1	LOW QUALITY PROTEIN: Golgi-specific brefeldin A-resistance guanine nucleotide exchange factor 1-like	LOC103511171	51.6	2496.96	2	1411	1431	T2:Phosphorylation (STY):0.00;S10:Phosphorylation (STY):17.25	T1412	KSPTRATSPYDAD	3563.21	4335.84	3837.46	5386.73	4536.9	7844.56	Quantified	GO:0032012(BP:regulation of ARF protein signal transduction);GO:0005086(MF:ARF guanyl-nucleotide exchange factor activity)				PF12783(Guanine nucleotide exchange factor in Golgi transport N-terminal);PF01369(Sec7 domain)
A0A3Q0IX48	A0A3Q0IX48|A0A3Q0IX48_DIACI	S	AT(+79.97)SPYDADES(+79.97)DPEELPSVYPR	10	21	LOW QUALITY PROTEIN: Golgi-specific brefeldin A-resistance guanine nucleotide exchange factor 1-like OS=Diaphorina citri OX=121845 GN=LOC103511171 PE=4 SV=1	LOW QUALITY PROTEIN: Golgi-specific brefeldin A-resistance guanine nucleotide exchange factor 1-like	LOC103511171	51.6	2496.96	2	1411	1431	T2:Phosphorylation (STY):0.00;S10:Phosphorylation (STY):17.25	S1420	PYDADESDPEELP	3563.21	4335.84	3837.46	5386.73	4536.9	7844.56	Quantified	GO:0032012(BP:regulation of ARF protein signal transduction);GO:0005086(MF:ARF guanyl-nucleotide exchange factor activity)				PF12783(Guanine nucleotide exchange factor in Golgi transport N-terminal);PF01369(Sec7 domain)
A0A3Q0IX48	A0A3Q0IX48|A0A3Q0IX48_DIACI	T	AT(+79.97)SPYDADESDPEELPSVYPR	2	21	LOW QUALITY PROTEIN: Golgi-specific brefeldin A-resistance guanine nucleotide exchange factor 1-like OS=Diaphorina citri OX=121845 GN=LOC103511171 PE=4 SV=1	LOW QUALITY PROTEIN: Golgi-specific brefeldin A-resistance guanine nucleotide exchange factor 1-like	LOC103511171	43.11	2416.99	5.9	1411	1431	T2:Phosphorylation (STY):0.00	T1412	KSPTRATSPYDAD	442.402	286.278	1277.98	161.903	267.313	1807.48	Quantified	GO:0032012(BP:regulation of ARF protein signal transduction);GO:0005086(MF:ARF guanyl-nucleotide exchange factor activity)				PF12783(Guanine nucleotide exchange factor in Golgi transport N-terminal);PF01369(Sec7 domain)
A0A1S3DA59	A0A1S3DA59|A0A1S3DA59_DIACI:A0A1S4EHR3|A0A1S4EHR3_DIACI:A0A1S3DA52|A0A1S3DA52_DIACI	T	AT(+79.97)T(+79.97)EEPEESKKEDEYVT(+79.97)DEDNDK	2	23	Uncharacterized abhydrolase domain-containing protein DDB_G0269086-like isoform X3 OS=Diaphorina citri OX=121845 GN=LOC103514494 PE=4 SV=1	Uncharacterized abhydrolase domain-containing protein DDB_G0269086-like isoform X3	LOC103514494	37.46	2940.04	1.2	335	357	T2:Phosphorylation (STY):0.00;T3:Phosphorylation (STY):0.00;T17:Phosphorylation (STY):0.00	T336	SEKERATTEEPEE	4847.7	1427.58	377.957	5801.48	2299.73	2989.95	Quantified	GO:0016787(MF:hydrolase activity)
A0A1S3DA59	A0A1S3DA59|A0A1S3DA59_DIACI:A0A1S4EHR3|A0A1S4EHR3_DIACI:A0A1S3DA52|A0A1S3DA52_DIACI	T	AT(+79.97)T(+79.97)EEPEESKKEDEYVT(+79.97)DEDNDK	3	23	Uncharacterized abhydrolase domain-containing protein DDB_G0269086-like isoform X3 OS=Diaphorina citri OX=121845 GN=LOC103514494 PE=4 SV=1	Uncharacterized abhydrolase domain-containing protein DDB_G0269086-like isoform X3	LOC103514494	37.46	2940.04	1.2	335	357	T2:Phosphorylation (STY):0.00;T3:Phosphorylation (STY):0.00;T17:Phosphorylation (STY):0.00	T337	EKERATTEEPEES	4847.7	1427.58	377.957	5801.48	2299.73	2989.95	Quantified	GO:0016787(MF:hydrolase activity)
A0A1S3DA59	A0A1S3DA59|A0A1S3DA59_DIACI:A0A1S4EHR3|A0A1S4EHR3_DIACI:A0A1S3DA52|A0A1S3DA52_DIACI	T	AT(+79.97)T(+79.97)EEPEESKKEDEYVT(+79.97)DEDNDK	17	23	Uncharacterized abhydrolase domain-containing protein DDB_G0269086-like isoform X3 OS=Diaphorina citri OX=121845 GN=LOC103514494 PE=4 SV=1	Uncharacterized abhydrolase domain-containing protein DDB_G0269086-like isoform X3	LOC103514494	37.46	2940.04	1.2	335	357	T2:Phosphorylation (STY):0.00;T3:Phosphorylation (STY):0.00;T17:Phosphorylation (STY):0.00	T351	KEDEYVTDEDNDK	4847.7	1427.58	377.957	5801.48	2299.73	2989.95	Quantified	GO:0016787(MF:hydrolase activity)
A0A3Q0IZP5	A0A3Q0IZP5|A0A3Q0IZP5_DIACI	T	AT(+79.97)T(+79.97)PVPSQR	2	9	Glycogen [starch] synthase OS=Diaphorina citri OX=121845 GN=LOC103512410 PE=3 SV=1	Glycogen [starch] synthase	LOC103512410	40.99	1115.44	2.3	2822	2830	T2:Phosphorylation (STY):0.00;T3:Phosphorylation (STY):0.00	T2823	PSSSRATTPVPSQ	452.116	1835.78	9772.81	137.943	19085.2	5856.8	Quantified	GO:0005978(BP:glycogen biosynthetic process);GO:0004373(MF:glycogen (starch) synthase activity)	K00693(NA)	ko00500(Starch and sucrose metabolism);ko04151(PI3K-Akt signaling pathway);ko04152(AMPK signaling pathway)		PF05693(Glycogen synthase)
A0A3Q0IZP5	A0A3Q0IZP5|A0A3Q0IZP5_DIACI	T	AT(+79.97)T(+79.97)PVPSQR	3	9	Glycogen [starch] synthase OS=Diaphorina citri OX=121845 GN=LOC103512410 PE=3 SV=1	Glycogen [starch] synthase	LOC103512410	40.99	1115.44	2.3	2822	2830	T2:Phosphorylation (STY):0.00;T3:Phosphorylation (STY):0.00	T2824	SSSRATTPVPSQR	452.116	1835.78	9772.81	137.943	19085.2	5856.8	Quantified	GO:0005978(BP:glycogen biosynthetic process);GO:0004373(MF:glycogen (starch) synthase activity)	K00693(NA)	ko00500(Starch and sucrose metabolism);ko04151(PI3K-Akt signaling pathway);ko04152(AMPK signaling pathway)		PF05693(Glycogen synthase)
A0A1S3DA59	A0A1S3DA59|A0A1S3DA59_DIACI:A0A1S4EHR3|A0A1S4EHR3_DIACI:A0A1S3DA52|A0A1S3DA52_DIACI	T	AT(+79.97)TEEPEES(+79.97)KKEDEYVT(+79.97)DEDNDK	2	23	Uncharacterized abhydrolase domain-containing protein DDB_G0269086-like isoform X3 OS=Diaphorina citri OX=121845 GN=LOC103514494 PE=4 SV=1	Uncharacterized abhydrolase domain-containing protein DDB_G0269086-like isoform X3	LOC103514494	28.04	2940.04	-1.4	335	357	T2:Phosphorylation (STY):0.00;S9:Phosphorylation (STY):0.00;T17:Phosphorylation (STY):9.40	T336	SEKERATTEEPEE	7593.15	1197.9	1345.25	14596.3	6454.99	5571.47	Quantified	GO:0016787(MF:hydrolase activity)
A0A1S3DA59	A0A1S3DA59|A0A1S3DA59_DIACI:A0A1S4EHR3|A0A1S4EHR3_DIACI:A0A1S3DA52|A0A1S3DA52_DIACI	S	AT(+79.97)TEEPEES(+79.97)KKEDEYVT(+79.97)DEDNDK	9	23	Uncharacterized abhydrolase domain-containing protein DDB_G0269086-like isoform X3 OS=Diaphorina citri OX=121845 GN=LOC103514494 PE=4 SV=1	Uncharacterized abhydrolase domain-containing protein DDB_G0269086-like isoform X3	LOC103514494	28.04	2940.04	-1.4	335	357	T2:Phosphorylation (STY):0.00;S9:Phosphorylation (STY):0.00;T17:Phosphorylation (STY):9.40	S343	TEEPEESKKEDEY	7593.15	1197.9	1345.25	14596.3	6454.99	5571.47	Quantified	GO:0016787(MF:hydrolase activity)
A0A1S3DA59	A0A1S3DA59|A0A1S3DA59_DIACI:A0A1S4EHR3|A0A1S4EHR3_DIACI:A0A1S3DA52|A0A1S3DA52_DIACI	T	AT(+79.97)TEEPEES(+79.97)KKEDEYVT(+79.97)DEDNDK	17	23	Uncharacterized abhydrolase domain-containing protein DDB_G0269086-like isoform X3 OS=Diaphorina citri OX=121845 GN=LOC103514494 PE=4 SV=1	Uncharacterized abhydrolase domain-containing protein DDB_G0269086-like isoform X3	LOC103514494	28.04	2940.04	-1.4	335	357	T2:Phosphorylation (STY):0.00;S9:Phosphorylation (STY):0.00;T17:Phosphorylation (STY):9.40	T351	KEDEYVTDEDNDK	7593.15	1197.9	1345.25	14596.3	6454.99	5571.47	Quantified	GO:0016787(MF:hydrolase activity)
A0A1S3DA59	A0A1S3DA59|A0A1S3DA59_DIACI:A0A1S4EHR3|A0A1S4EHR3_DIACI:A0A1S3DA52|A0A1S3DA52_DIACI	T	AT(+79.97)TEEPEES(+79.97)KKEDEYVTDEDNDK	2	23	Uncharacterized abhydrolase domain-containing protein DDB_G0269086-like isoform X3 OS=Diaphorina citri OX=121845 GN=LOC103514494 PE=4 SV=1	Uncharacterized abhydrolase domain-containing protein DDB_G0269086-like isoform X3	LOC103514494	30.52	2860.07	5.5	335	357	T2:Phosphorylation (STY):0.00;S9:Phosphorylation (STY):0.00	T336	SEKERATTEEPEE	987.844	500.176	147.798	215.794	2520.57	1512	Quantified	GO:0016787(MF:hydrolase activity)
A0A1S3DA59	A0A1S3DA59|A0A1S3DA59_DIACI:A0A1S4EHR3|A0A1S4EHR3_DIACI:A0A1S3DA52|A0A1S3DA52_DIACI	S	AT(+79.97)TEEPEES(+79.97)KKEDEYVTDEDNDK	9	23	Uncharacterized abhydrolase domain-containing protein DDB_G0269086-like isoform X3 OS=Diaphorina citri OX=121845 GN=LOC103514494 PE=4 SV=1	Uncharacterized abhydrolase domain-containing protein DDB_G0269086-like isoform X3	LOC103514494	30.52	2860.07	5.5	335	357	T2:Phosphorylation (STY):0.00;S9:Phosphorylation (STY):0.00	S343	TEEPEESKKEDEY	987.844	500.176	147.798	215.794	2520.57	1512	Quantified	GO:0016787(MF:hydrolase activity)
A0A1S3DA59	A0A1S3DA59|A0A1S3DA59_DIACI:A0A1S4EHR3|A0A1S4EHR3_DIACI:A0A1S3DA52|A0A1S3DA52_DIACI	T	AT(+79.97)TEEPEESKKEDEY(+79.97)VTDEDNDK	2	23	Uncharacterized abhydrolase domain-containing protein DDB_G0269086-like isoform X3 OS=Diaphorina citri OX=121845 GN=LOC103514494 PE=4 SV=1	Uncharacterized abhydrolase domain-containing protein DDB_G0269086-like isoform X3	LOC103514494	39.42	2860.07	0.6	335	357	T2:Phosphorylation (STY):0.00;Y15:Phosphorylation (STY):0.00	T336	SEKERATTEEPEE	4951.03	111.075	2805.79	684.86	2520.57	4187.61	Quantified	GO:0016787(MF:hydrolase activity)
A0A1S3DA59	A0A1S3DA59|A0A1S3DA59_DIACI:A0A1S4EHR3|A0A1S4EHR3_DIACI:A0A1S3DA52|A0A1S3DA52_DIACI	Y	AT(+79.97)TEEPEESKKEDEY(+79.97)VTDEDNDK	15	23	Uncharacterized abhydrolase domain-containing protein DDB_G0269086-like isoform X3 OS=Diaphorina citri OX=121845 GN=LOC103514494 PE=4 SV=1	Uncharacterized abhydrolase domain-containing protein DDB_G0269086-like isoform X3	LOC103514494	39.42	2860.07	0.6	335	357	T2:Phosphorylation (STY):0.00;Y15:Phosphorylation (STY):0.00	Y349	SKKEDEYVTDEDN	4951.03	111.075	2805.79	684.86	2520.57	4187.61	Quantified	GO:0016787(MF:hydrolase activity)
A0A3Q0IZP5	A0A3Q0IZP5|A0A3Q0IZP5_DIACI	T	AT(+79.97)TPVPS(+79.97)QR	2	9	Glycogen [starch] synthase OS=Diaphorina citri OX=121845 GN=LOC103512410 PE=3 SV=1	Glycogen [starch] synthase	LOC103512410	49.77	1115.44	-7	2822	2830	T2:Phosphorylation (STY):0.00;S7:Phosphorylation (STY):40.19	T2823	PSSSRATTPVPSQ		295.233	636.361	241.769	448.115	412.233	Quantified	GO:0005978(BP:glycogen biosynthetic process);GO:0004373(MF:glycogen (starch) synthase activity)	K00693(NA)	ko00500(Starch and sucrose metabolism);ko04151(PI3K-Akt signaling pathway);ko04152(AMPK signaling pathway)		PF05693(Glycogen synthase)
A0A3Q0IZP5	A0A3Q0IZP5|A0A3Q0IZP5_DIACI	S	AT(+79.97)TPVPS(+79.97)QR	7	9	Glycogen [starch] synthase OS=Diaphorina citri OX=121845 GN=LOC103512410 PE=3 SV=1	Glycogen [starch] synthase	LOC103512410	49.77	1115.44	-7	2822	2830	T2:Phosphorylation (STY):0.00;S7:Phosphorylation (STY):40.19	S2828	ATTPVPSQRNSDD		295.233	636.361	241.769	448.115	412.233	Quantified	GO:0005978(BP:glycogen biosynthetic process);GO:0004373(MF:glycogen (starch) synthase activity)	K00693(NA)	ko00500(Starch and sucrose metabolism);ko04151(PI3K-Akt signaling pathway);ko04152(AMPK signaling pathway)		PF05693(Glycogen synthase)
A0A3Q0IZP5	A0A3Q0IZP5|A0A3Q0IZP5_DIACI	T	AT(+79.97)TPVPSQR	2	9	Glycogen [starch] synthase OS=Diaphorina citri OX=121845 GN=LOC103512410 PE=3 SV=1	Glycogen [starch] synthase	LOC103512410	28.47	1035.47	-3.5	2822	2830	T2:Phosphorylation (STY):0.00	T2823	PSSSRATTPVPSQ	386.678	335.525	4300.62	4656.03	4196.29	3564.7	Quantified	GO:0005978(BP:glycogen biosynthetic process);GO:0004373(MF:glycogen (starch) synthase activity)	K00693(NA)	ko00500(Starch and sucrose metabolism);ko04151(PI3K-Akt signaling pathway);ko04152(AMPK signaling pathway)		PF05693(Glycogen synthase)
A0A3Q0JD23	A0A3Q0JD23|A0A3Q0JD23_DIACI	T	AT(+79.97)VVQS(+79.97)PQEPISVTETISEDTVLDLPQEK	2	29	Titin OS=Diaphorina citri OX=121845 GN=LOC103518851 PE=4 SV=1	Titin	LOC103518851	34.89	3312.53	2.9	5668	5696	T2:Phosphorylation (STY):0.00;S6:Phosphorylation (STY):0.00	T5669	KPEDRATVVQSPQ	368.402	1355.42	183.698		686.506	762.201	Quantified					PF07679(Immunoglobulin I-set domain)
A0A3Q0JD23	A0A3Q0JD23|A0A3Q0JD23_DIACI	S	AT(+79.97)VVQS(+79.97)PQEPISVTETISEDTVLDLPQEK	6	29	Titin OS=Diaphorina citri OX=121845 GN=LOC103518851 PE=4 SV=1	Titin	LOC103518851	34.89	3312.53	2.9	5668	5696	T2:Phosphorylation (STY):0.00;S6:Phosphorylation (STY):0.00	S5673	RATVVQSPQEPIS	368.402	1355.42	183.698		686.506	762.201	Quantified					PF07679(Immunoglobulin I-set domain)
A0A3Q0JD23	A0A3Q0JD23|A0A3Q0JD23_DIACI	T	AT(+79.97)VVQSPQEPISVTETISEDTVLDLPQEK	2	29	Titin OS=Diaphorina citri OX=121845 GN=LOC103518851 PE=4 SV=1	Titin	LOC103518851	57.86	3232.56	0.7	5668	5696	T2:Phosphorylation (STY):0.00	T5669	KPEDRATVVQSPQ	314.08	383.561	2811.17	293.899	2462.28	486.421	Quantified					PF07679(Immunoglobulin I-set domain)
Q0PXZ5	Q0PXZ5|Q0PXZ5_DIACI:A0A3Q0J764|A0A3Q0J764_DIACI	T	ATATT(+79.97)PSKDAK	5	11	Large ribosomal subunit protein eL33 OS=Diaphorina citri OX=121845 PE=2 SV=1	Large ribosomal subunit protein eL33		51.66	1169.53	1.5	33	43	T5:Phosphorylation (STY):20.92	T37	KKATATTPSKDAK	2617.68	164.881		129.277	1689.89	3224.73	Quantified	GO:0006412(BP:translation);GO:0005840(CC:ribosome);GO:0003735(MF:structural constituent of ribosome)	K02917(NA)	ko03010(Ribosome)		PF01247(Ribosomal protein L35Ae)
A0A1S3D8U5	A0A1S3D8U5|A0A1S3D8U5_DIACI	S	ATDVPVAQS(+79.97)DDDE	9	13	Histone H1-II-like OS=Diaphorina citri OX=121845 GN=LOC103513761 PE=4 SV=1	Histone H1-II-like	LOC103513761	73.58	1440.53	-2.2	84	96	S9:Phosphorylation (STY):96.04	S92	DVPVAQSDDDE__	345634	249635	378558	327500	315783	159756	Quantified	GO:0003677(MF:DNA binding)				PF02178(AT hook motif)
A0A3Q0IM19	A0A3Q0IM19|A0A3Q0IM19_DIACI	T	ATEDT(+79.97)VTSEEVKTPEMEAK	5	19	Uncharacterized protein LOC103506519 OS=Diaphorina citri OX=121845 GN=LOC103506519 PE=4 SV=1	Uncharacterized protein LOC103506519	LOC103506519	30.73	2173.93	-0.4	1172	1190	T5:Phosphorylation (STY):0.00	T1176	IKATEDTVTSEEV	8698.67	5988.3	5351.52	934.258	443.994	3502.59	Quantified	GO:0004252(MF:serine-type endopeptidase activity)				PF00089(Trypsin)
A0A3Q0IM19	A0A3Q0IM19|A0A3Q0IM19_DIACI:A0A3Q0JKP1|A0A3Q0JKP1_DIACI	T	ATEDTVT(+79.97)SEEVK	7	12	Uncharacterized protein LOC103506519 OS=Diaphorina citri OX=121845 GN=LOC103506519 PE=4 SV=1	Uncharacterized protein LOC103506519	LOC103506519	50.32	1387.58	0.5	1172	1183	T7:Phosphorylation (STY):0.00	T1178	ATEDTVTSEEVKT	7655.94	617.64	1228.67	8310.09	2496.02	3459.85	Quantified	GO:0004252(MF:serine-type endopeptidase activity)				PF00089(Trypsin)
A0A3Q0IM19	A0A3Q0IM19|A0A3Q0IM19_DIACI	T	ATEDTVT(+79.97)SEEVKTPEMEAK	7	19	Uncharacterized protein LOC103506519 OS=Diaphorina citri OX=121845 GN=LOC103506519 PE=4 SV=1	Uncharacterized protein LOC103506519	LOC103506519	27.81	2173.93	2	1172	1190	T7:Phosphorylation (STY):0.00	T1178	ATEDTVTSEEVKT	8698.67	5690.04	2319.44	422.853	627.945	250.275	Quantified	GO:0004252(MF:serine-type endopeptidase activity)				PF00089(Trypsin)
A0A3Q0IM19	A0A3Q0IM19|A0A3Q0IM19_DIACI:A0A3Q0JKP1|A0A3Q0JKP1_DIACI	S	ATEDTVTS(+79.97)EEVK	8	12	Uncharacterized protein LOC103506519 OS=Diaphorina citri OX=121845 GN=LOC103506519 PE=4 SV=1	Uncharacterized protein LOC103506519	LOC103506519	46.13	1387.58	-0.8	1172	1183	S8:Phosphorylation (STY):12.28	S1179	TEDTVTSEEVKTP	7655.94	1507.53	3183.73	8310.09	2496.02	3459.85	Quantified	GO:0004252(MF:serine-type endopeptidase activity)				PF00089(Trypsin)
A0A3Q0IM19	A0A3Q0IM19|A0A3Q0IM19_DIACI	S	ATEDTVTS(+79.97)EEVKTPEMEAK	8	19	Uncharacterized protein LOC103506519 OS=Diaphorina citri OX=121845 GN=LOC103506519 PE=4 SV=1	Uncharacterized protein LOC103506519	LOC103506519	39.07	2173.93	-2.7	1172	1190	S8:Phosphorylation (STY):8.69	S1179	TEDTVTSEEVKTP	237.93			86.8317	183.766	163.298	Quantified	GO:0004252(MF:serine-type endopeptidase activity)				PF00089(Trypsin)
A0A1S3DLY3	A0A1S3DLY3|A0A1S3DLY3_DIACI	S	ATENLGLEIPS(+79.97)EEEDEDTTDFR	11	22	Uncharacterized protein LOC103520886 OS=Diaphorina citri OX=121845 GN=LOC103520886 PE=3 SV=1	Uncharacterized protein LOC103520886	LOC103520886	53.25	2589.06	-2.3	380	401	S11:Phosphorylation (STY):21.15	S390	LGLEIPSEEEDED	1862.75	7257.61	5501.3	6878.03	5376.33	6638.11	Quantified	GO:0016021(CC:integral component of membrane)			Membrane;Multi-pass membrane protein	PF12832(MFS_1 like family)
A0A1S3DLY3	A0A1S3DLY3|A0A1S3DLY3_DIACI	T	ATENLGLEIPSEEEDEDT(+79.97)TDFR	18	22	Uncharacterized protein LOC103520886 OS=Diaphorina citri OX=121845 GN=LOC103520886 PE=3 SV=1	Uncharacterized protein LOC103520886	LOC103520886	37.16	2589.06	1.9	380	401	T18:Phosphorylation (STY):0.00	T397	EEEDEDTTDFRQH	5602.35	7257.61	5501.3	6878.03	5376.33	6638.11	Quantified	GO:0016021(CC:integral component of membrane)			Membrane;Multi-pass membrane protein	PF12832(MFS_1 like family)
A0A3Q0J0Y7	A0A3Q0J0Y7|A0A3Q0J0Y7_DIACI	S	ATFNLDELEGALPEGS(+79.97)SK	16	18	Eukaryotic translation initiation factor 2 subunit 2 OS=Diaphorina citri OX=121845 GN=LOC103513038 PE=3 SV=1	Eukaryotic translation initiation factor 2 subunit 2	LOC103513038	54.97	1956.87	0.7	80	97	S16:Phosphorylation (STY):0.00	S95	GALPEGSSKDGVD	1794.87	1843.31	1153.57	1764.58	2618.01	1051.91	Quantified	GO:0003743(MF:translation initiation factor activity)				PF01873(Domain found in IF2B/IF5)
A0A3Q0J0Y7	A0A3Q0J0Y7|A0A3Q0J0Y7_DIACI	S	ATFNLDELEGALPEGSS(+79.97)K	17	18	Eukaryotic translation initiation factor 2 subunit 2 OS=Diaphorina citri OX=121845 GN=LOC103513038 PE=3 SV=1	Eukaryotic translation initiation factor 2 subunit 2	LOC103513038	43.51	1956.87	2.5	80	97	S17:Phosphorylation (STY):17.01	S96	ALPEGSSKDGVDI	1132.4	127.724	1153.57	1764.58	1672.27	1051.91	Quantified	GO:0003743(MF:translation initiation factor activity)				PF01873(Domain found in IF2B/IF5)
A0A1S3D8S7	A0A1S3D8S7|A0A1S3D8S7_DIACI	S	ATGSGPGS(+79.97)YNYTTER	8	15	Protein anoxia up-regulated OS=Diaphorina citri OX=121845 GN=LOC103513598 PE=4 SV=1	Protein anoxia up-regulated	LOC103513598	52.15	1639.65	2.8	63	77	S8:Phosphorylation (STY):10.11	S70	TGSGPGSYNYTTE	511.59	1804.88	2173.6	276.599	797.148	479.931	Quantified
A0A3Q0JAC5	A0A3Q0JAC5|A0A3Q0JAC5_DIACI:A0A1S3DPD4|A0A1S3DPD4_DIACI	T	ATITGT(+79.97)GASPTSK	6	13	Protein lingerer OS=Diaphorina citri OX=121845 GN=LOC103517494 PE=4 SV=1	Protein lingerer	LOC103517494	49.36	1270.58	2	153	165	T6:Phosphorylation (STY):0.00	T158	RATITGTGASPTS	112.821	980.643	1354.83	2960.06	2362.78	1972.62	Quantified				Cytoplasm	PF12478(Ubiquitin-associated protein 2)
A0A3Q0JAC5	A0A3Q0JAC5|A0A3Q0JAC5_DIACI:A0A1S3DPD4|A0A1S3DPD4_DIACI	S	ATITGTGAS(+79.97)PTSK	9	13	Protein lingerer OS=Diaphorina citri OX=121845 GN=LOC103517494 PE=4 SV=1	Protein lingerer	LOC103517494	48.56	1270.58	-2	153	165	S9:Phosphorylation (STY):11.10	S161	ITGTGASPTSKRA	1568.92	1018.76	1354.83	2960.06	2362.78	1972.62	Quantified				Cytoplasm	PF12478(Ubiquitin-associated protein 2)
A0A3Q0J343	A0A3Q0J343|A0A3Q0J343_DIACI	S	ATLGEADKEYNS(+79.97)IVNLVR	12	18	Alpha-actinin, sarcomeric OS=Diaphorina citri OX=121845 GN=LOC103514051 PE=4 SV=1	Alpha-actinin, sarcomeric	LOC103514051	45.78	2071	1.8	263	280	S12:Phosphorylation (STY):0.00	S274	ADKEYNSIVNLVR	3026.52	3111.27	7394	6083.31	12666.1	6114.46	Quantified	GO:0051764(BP:actin crosslink formation);GO:0051017(BP:actin filament bundle assembly);GO:0051015(MF:actin filament binding);GO:0005509(MF:calcium ion binding)	K05699(NA)	ko04510(Focal adhesion);ko04520(Adherens junction);ko04530(Tight junction);ko04810(Regulation of actin cytoskeleton)		PF00435(Spectrin repeat);PF08726(Ca2+ insensitive EF hand)
A0A3Q0JD23	A0A3Q0JD23|A0A3Q0JD23_DIACI	T	ATNIGGVAT(+79.97)C(+57.02)SANLIVLEKEESGEAPK	9	27	Titin OS=Diaphorina citri OX=121845 GN=LOC103518851 PE=4 SV=1	Titin	LOC103518851	30.79	2837.35	-5.3	4168	4194	T9:Phosphorylation (STY):3.89;C10:Carbamidomethylation:1000.00	T4176	NIGGVATCSANLI	6357.24	163.743	443.692	4766.57	2511.65	31411.9	Quantified					PF07679(Immunoglobulin I-set domain)
A0A3Q0JD23	A0A3Q0JD23|A0A3Q0JD23_DIACI	S	ATNIGGVATC(+57.02)S(+79.97)ANLIVLEKEESGEAPK	11	27	Titin OS=Diaphorina citri OX=121845 GN=LOC103518851 PE=4 SV=1	Titin	LOC103518851	61.26	2837.35	-3.4	4168	4194	C10:Carbamidomethylation:1000.00;S11:Phosphorylation (STY):0.58	S4178	GGVATCSANLIVL	7875.75	34453.6	22224.5	3749.16	32511.7	26478.2	Quantified					PF07679(Immunoglobulin I-set domain)
A0A3Q0JD23	A0A3Q0JD23|A0A3Q0JD23_DIACI	S	ATNIGGVATC(+57.02)SANLIVLEKEES(+79.97)GEAPK	22	27	Titin OS=Diaphorina citri OX=121845 GN=LOC103518851 PE=4 SV=1	Titin	LOC103518851	68.13	2837.35	2	4168	4194	C10:Carbamidomethylation:1000.00;S22:Phosphorylation (STY):4.45	S4189	VLEKEESGEAPKF	7875.75	34453.6	443.692	5614.02	2511.65	26478.2	Quantified					PF07679(Immunoglobulin I-set domain)
A0A1S3D367	A0A1S3D367|A0A1S3D367_DIACI	T	ATNVKLT(+79.97)PPPPTLPTPPTPTPTSPK	7	25	Cytoplasmic phosphatidylinositol transfer protein 1 OS=Diaphorina citri OX=121845 GN=LOC103510487 PE=4 SV=1	Cytoplasmic phosphatidylinositol transfer protein 1	LOC103510487	55.54	2629.38	-0.4	246	270	T7:Phosphorylation (STY):10.19	T252	ATNVKLTPPPPTL	1004.85	576.8	950.898	369.807	2236	1790.88	Quantified	GO:0005548(MF:phospholipid transporter activity)				PF02121(Phosphatidylinositol transfer protein)
A0A3Q0IPJ2	A0A3Q0IPJ2|A0A3Q0IPJ2_DIACI	S	ATPEDDGDS(+79.97)LDLELEK	9	16	LOW QUALITY PROTEIN: obscurin-like OS=Diaphorina citri OX=121845 GN=LOC103507575 PE=3 SV=1	LOW QUALITY PROTEIN: obscurin-like	LOC103507575	43.4	1825.75	5.5	2166	2181	S9:Phosphorylation (STY):17.76	S2174	PEDDGDSLDLELE	809.687	199.167	679.295	1686.39	1782.77	1206.96	Quantified	GO:0005524(MF:ATP binding);GO:0005085(MF:guanyl-nucleotide exchange factor activity);GO:0004672(MF:protein kinase activity)				PF00621(RhoGEF domain);PF00069(Protein kinase domain);PF00041(Fibronectin type III domain);PF07679(Immunoglobulin I-set domain)
A0A3Q0IVR9	A0A3Q0IVR9|A0A3Q0IVR9_DIACI	S	ATPLS(+79.97)PVKPR	5	10	Inositol 1,4,5-trisphosphate receptor OS=Diaphorina citri OX=121845 GN=LOC103507937 PE=3 SV=1	Inositol 1,4,5-trisphosphate receptor	LOC103507937	56.12	1144.6	1.3	1203	1212	S5:Phosphorylation (STY):22.45	S1207	SRATPLSPVKPRK	687.29	1465.09	475.945	708.015	537.876	411.086	Quantified	GO:0005783(CC:endoplasmic reticulum);GO:0016021(CC:integral component of membrane);GO:0070679(MF:inositol 1,4,5 trisphosphate binding);GO:0005220(MF:inositol 1,4,5-trisphosphate-sensitive calcium-release channel activity)			Endoplasmic reticulum membrane;Multi-pass membrane protein;Membrane	PF08709(Inositol 1,4,5-trisphosphate/ryanodine receptor);PF02815(MIR domain);PF08454(RyR and IP3R Homology associated);PF01365(RIH domain)
A0A3Q0JLC8	A0A3Q0JLC8|A0A3Q0JLC8_DIACI	S	ATPVDDVGS(+79.97)DAEGQIR	9	16	Something about silencing protein 10 OS=Diaphorina citri OX=121845 GN=LOC103524231 PE=3 SV=1	Something about silencing protein 10	LOC103524231	54.28	1708.73	1.6	14	29	S9:Phosphorylation (STY):115.21	S22	PVDDVGSDAEGQI	1256.86	1559.49	1628.69	6161.83	1779.61	2695.6	Quantified					PF09368(Sas10 C-terminal domain);PF04000(Sas10/Utp3/C1D family)
A0A3Q0J7H3	A0A3Q0J7H3|A0A3Q0J7H3_DIACI	S	ATS(+79.97)AGGLLDYR	3	11	J domain-containing protein DDB_G0295729 OS=Diaphorina citri OX=121845 GN=LOC103514053 PE=3 SV=1	J domain-containing protein DDB_G0295729	LOC103514053	62.53	1202.53	-4.1	231	241	S3:Phosphorylation (STY):0.00	S233	NKKRATSAGGLLD	5586.75	3215.94	3258.33	8348.66	4456.51	6266.39	Quantified	GO:0000226(BP:microtubule cytoskeleton organization);GO:0015630(CC:microtubule cytoskeleton)				PF05672(MAP7 (E-MAP-115) family)
A0A3Q0IRW1	A0A3Q0IRW1|A0A3Q0IRW1_DIACI	S	ATS(+79.97)LNHSYEVSAETK	3	15	Uncharacterized protein LOC103506518 OS=Diaphorina citri OX=121845 GN=LOC103506518 PE=4 SV=1	Uncharacterized protein LOC103506518	LOC103506518	32.89	1715.74	0.6	22	36	S3:Phosphorylation (STY):17.01	S24	SDHKATSLNHSYE	3576.33	2847.27	2997.55	261.135	2558.2	2589.51	Quantified	GO:0016021(CC:integral component of membrane)				PF01390(SEA domain)
A0A1S4EID2	A0A1S4EID2|A0A1S4EID2_DIACI	S	ATS(+79.97)NVFAM(+15.99)FDQAQIQNFK	3	18	Myosin regulatory light chain sqh OS=Diaphorina citri OX=121845 GN=LOC103515046 PE=4 SV=1	Myosin regulatory light chain sqh	LOC103515046	64.49	2154.94	1.5	20	37	S3:Phosphorylation (STY):0.00;M8:Oxidation (M):1000.00	S22	RAQRATSNVFAMF	19858.3	19634.2	14875.5	617.603	5415.39	2264.75	Quantified	GO:0005509(MF:calcium ion binding)	K12757(NA)	ko04510(Focal adhesion);ko04520(Adherens junction);ko04530(Tight junction);ko04810(Regulation of actin cytoskeleton);ko04814(Motor proteins)		PF13405(EF-hand domain)
A0A1S4EID2	A0A1S4EID2|A0A1S4EID2_DIACI	S	ATS(+79.97)NVFAMFDQAQIQNFK	3	18	Myosin regulatory light chain sqh OS=Diaphorina citri OX=121845 GN=LOC103515046 PE=4 SV=1	Myosin regulatory light chain sqh	LOC103515046	76.04	2138.95	2.7	20	37	S3:Phosphorylation (STY):0.00	S22	RAQRATSNVFAMF	42170.9	66556.3	37031.1	69.4483	17162.3	8209.24	Quantified	GO:0005509(MF:calcium ion binding)	K12757(NA)	ko04510(Focal adhesion);ko04520(Adherens junction);ko04530(Tight junction);ko04810(Regulation of actin cytoskeleton);ko04814(Motor proteins)		PF13405(EF-hand domain)
A0A3Q0J6R4	A0A3Q0J6R4|A0A3Q0J6R4_DIACI:A0A1S4EJE7|A0A1S4EJE7_DIACI	S	ATS(+79.97)PEETEDLSPLPSQGQQSAR	3	22	cAMP-dependent protein kinase type I regulatory subunit-like OS=Diaphorina citri OX=121845 GN=LOC113470128 PE=4 SV=1	cAMP-dependent protein kinase type I regulatory subunit-like	LOC113470128	75.29	2407.05	-3.1	11	32	S3:Phosphorylation (STY):0.00	S13	AKLKATSPEETED	13155	27712.1	22747.3	20590.7	18264.8	13841.6	Quantified	GO:0001932(BP:regulation of protein phosphorylation);GO:0000166(MF:nucleotide binding)
A0A3Q0IP08	A0A3Q0IP08|A0A3Q0IP08_DIACI	S	ATS(+79.97)PPGSPSIPR	3	12	Mitogen-activated protein kinase kinase kinase 10 OS=Diaphorina citri OX=121845 GN=LOC103507272 PE=3 SV=1	Mitogen-activated protein kinase kinase kinase 10	LOC103507272	57.98	1245.58	5.3	511	522	S3:Phosphorylation (STY):0.00	S513	KSRKATSPPGSPS	1160.98	178.849	598.533	3111.36	1110.58	388.803	Quantified	GO:0005524(MF:ATP binding);GO:0004672(MF:protein kinase activity)	K04417(NA)	ko04010(MAPK signaling pathway);ko04013(MAPK signaling pathway - fly)		PF00018(SH3 domain);PF07714(Protein tyrosine kinase)
A0A3Q0JGD4	A0A3Q0JGD4|A0A3Q0JGD4_DIACI:A0A3Q0JDU3|A0A3Q0JDU3_DIACI	S	ATS(+79.97)PSPPSNSVFLR	3	14	Serine/arginine repetitive matrix protein 1-like OS=Diaphorina citri OX=121845 GN=LOC103520687 PE=4 SV=1	Serine/arginine repetitive matrix protein 1-like	LOC103520687	58.72	1538.71	1.7	190	203	S3:Phosphorylation (STY):14.02	S192	MVTRATSPSPPSN	5592.17	6458.45	6275.53	4538.32	5003.17	2836.56	Quantified
A0A3Q0IX48	A0A3Q0IX48|A0A3Q0IX48_DIACI	S	ATS(+79.97)PYDADES(+79.97)DPEELPSVYPR	3	21	LOW QUALITY PROTEIN: Golgi-specific brefeldin A-resistance guanine nucleotide exchange factor 1-like OS=Diaphorina citri OX=121845 GN=LOC103511171 PE=4 SV=1	LOW QUALITY PROTEIN: Golgi-specific brefeldin A-resistance guanine nucleotide exchange factor 1-like	LOC103511171	67.29	2496.96	-0.4	1411	1431	S3:Phosphorylation (STY):0.00;S10:Phosphorylation (STY):24.47	S1413	SPTRATSPYDADE	3563.21	4335.84	896.025	3142.14	297.681	7844.56	Quantified	GO:0032012(BP:regulation of ARF protein signal transduction);GO:0005086(MF:ARF guanyl-nucleotide exchange factor activity)				PF12783(Guanine nucleotide exchange factor in Golgi transport N-terminal);PF01369(Sec7 domain)
A0A3Q0IX48	A0A3Q0IX48|A0A3Q0IX48_DIACI	S	ATS(+79.97)PYDADES(+79.97)DPEELPSVYPR	10	21	LOW QUALITY PROTEIN: Golgi-specific brefeldin A-resistance guanine nucleotide exchange factor 1-like OS=Diaphorina citri OX=121845 GN=LOC103511171 PE=4 SV=1	LOW QUALITY PROTEIN: Golgi-specific brefeldin A-resistance guanine nucleotide exchange factor 1-like	LOC103511171	67.29	2496.96	-0.4	1411	1431	S3:Phosphorylation (STY):0.00;S10:Phosphorylation (STY):24.47	S1420	PYDADESDPEELP	3563.21	4335.84	896.025	3142.14	297.681	7844.56	Quantified	GO:0032012(BP:regulation of ARF protein signal transduction);GO:0005086(MF:ARF guanyl-nucleotide exchange factor activity)				PF12783(Guanine nucleotide exchange factor in Golgi transport N-terminal);PF01369(Sec7 domain)
A0A3Q0IX48	A0A3Q0IX48|A0A3Q0IX48_DIACI	S	ATS(+79.97)PYDADESDPEELPSVYPR	3	21	LOW QUALITY PROTEIN: Golgi-specific brefeldin A-resistance guanine nucleotide exchange factor 1-like OS=Diaphorina citri OX=121845 GN=LOC103511171 PE=4 SV=1	LOW QUALITY PROTEIN: Golgi-specific brefeldin A-resistance guanine nucleotide exchange factor 1-like	LOC103511171	27.37	2416.99	2.4	1411	1431	S3:Phosphorylation (STY):0.00	S1413	SPTRATSPYDADE	442.402	660.526	1277.98	161.903	13335.4	18329.6	Quantified	GO:0032012(BP:regulation of ARF protein signal transduction);GO:0005086(MF:ARF guanyl-nucleotide exchange factor activity)				PF12783(Guanine nucleotide exchange factor in Golgi transport N-terminal);PF01369(Sec7 domain)
A0A3Q0IQ73	A0A3Q0IQ73|A0A3Q0IQ73_DIACI	S	ATSGEAS(+79.97)AGTGDIPVSVNK	7	19	Uncharacterized protein LOC103505336 OS=Diaphorina citri OX=121845 GN=LOC103505336 PE=4 SV=1	Uncharacterized protein LOC103505336	LOC103505336	25.34	1839.83	0.9	313	331	S7:Phosphorylation (STY):0.00	S319	ATSGEASAGTGDI	387.874	728.295	576.989		1775.41	480.856	Quantified
A0A3Q0IRW1	A0A3Q0IRW1|A0A3Q0IRW1_DIACI	S	ATSLNHS(+79.97)YEVSAETK	7	15	Uncharacterized protein LOC103506518 OS=Diaphorina citri OX=121845 GN=LOC103506518 PE=4 SV=1	Uncharacterized protein LOC103506518	LOC103506518	26.1	1715.74	1.3	22	36	S7:Phosphorylation (STY):0.00	S28	ATSLNHSYEVSAE	984.44	345.588	441.597	341.481	279.494	302.88	Quantified	GO:0016021(CC:integral component of membrane)				PF01390(SEA domain)
A0A3Q0J6R4	A0A3Q0J6R4|A0A3Q0J6R4_DIACI:A0A1S4EJE7|A0A1S4EJE7_DIACI	S	ATSPEETEDLS(+79.97)PLPSQGQQSAR	11	22	cAMP-dependent protein kinase type I regulatory subunit-like OS=Diaphorina citri OX=121845 GN=LOC113470128 PE=4 SV=1	cAMP-dependent protein kinase type I regulatory subunit-like	LOC113470128	50.9	2407.05	-2.8	11	32	S11:Phosphorylation (STY):11.01	S21	EETEDLSPLPSQG	1014.35	1050.6	677.097	1798.78	632.289	940.436	Quantified	GO:0001932(BP:regulation of protein phosphorylation);GO:0000166(MF:nucleotide binding)
A0A3Q0IX48	A0A3Q0IX48|A0A3Q0IX48_DIACI	Y	ATSPY(+79.97)DADES(+79.97)DPEELPSVYPR	5	21	LOW QUALITY PROTEIN: Golgi-specific brefeldin A-resistance guanine nucleotide exchange factor 1-like OS=Diaphorina citri OX=121845 GN=LOC103511171 PE=4 SV=1	LOW QUALITY PROTEIN: Golgi-specific brefeldin A-resistance guanine nucleotide exchange factor 1-like	LOC103511171	36.53	2496.96	0.2	1411	1431	Y5:Phosphorylation (STY):0.00;S10:Phosphorylation (STY):20.76	Y1415	TRATSPYDADESD	745.171	1434.77	3837.46	3142.14	4536.9	1432.22	Quantified	GO:0032012(BP:regulation of ARF protein signal transduction);GO:0005086(MF:ARF guanyl-nucleotide exchange factor activity)				PF12783(Guanine nucleotide exchange factor in Golgi transport N-terminal);PF01369(Sec7 domain)
A0A3Q0IX48	A0A3Q0IX48|A0A3Q0IX48_DIACI	S	ATSPY(+79.97)DADES(+79.97)DPEELPSVYPR	10	21	LOW QUALITY PROTEIN: Golgi-specific brefeldin A-resistance guanine nucleotide exchange factor 1-like OS=Diaphorina citri OX=121845 GN=LOC103511171 PE=4 SV=1	LOW QUALITY PROTEIN: Golgi-specific brefeldin A-resistance guanine nucleotide exchange factor 1-like	LOC103511171	36.53	2496.96	0.2	1411	1431	Y5:Phosphorylation (STY):0.00;S10:Phosphorylation (STY):20.76	S1420	PYDADESDPEELP	745.171	1434.77	3837.46	3142.14	4536.9	1432.22	Quantified	GO:0032012(BP:regulation of ARF protein signal transduction);GO:0005086(MF:ARF guanyl-nucleotide exchange factor activity)				PF12783(Guanine nucleotide exchange factor in Golgi transport N-terminal);PF01369(Sec7 domain)
A0A3Q0IX48	A0A3Q0IX48|A0A3Q0IX48_DIACI	Y	ATSPY(+79.97)DADESDPEELPSVYPR	5	21	LOW QUALITY PROTEIN: Golgi-specific brefeldin A-resistance guanine nucleotide exchange factor 1-like OS=Diaphorina citri OX=121845 GN=LOC103511171 PE=4 SV=1	LOW QUALITY PROTEIN: Golgi-specific brefeldin A-resistance guanine nucleotide exchange factor 1-like	LOC103511171	35.7	2416.99	-0.5	1411	1431	Y5:Phosphorylation (STY):0.00	Y1415	TRATSPYDADESD	6872.61	8590.53	11385.2	21687.2	267.313	1807.48	Quantified	GO:0032012(BP:regulation of ARF protein signal transduction);GO:0005086(MF:ARF guanyl-nucleotide exchange factor activity)				PF12783(Guanine nucleotide exchange factor in Golgi transport N-terminal);PF01369(Sec7 domain)
A0A3Q0IX48	A0A3Q0IX48|A0A3Q0IX48_DIACI	S	ATSPYDADES(+79.97)DPEELPSVYPR	10	21	LOW QUALITY PROTEIN: Golgi-specific brefeldin A-resistance guanine nucleotide exchange factor 1-like OS=Diaphorina citri OX=121845 GN=LOC103511171 PE=4 SV=1	LOW QUALITY PROTEIN: Golgi-specific brefeldin A-resistance guanine nucleotide exchange factor 1-like	LOC103511171	72.94	2416.99	1.6	1411	1431	S10:Phosphorylation (STY):30.64	S1420	PYDADESDPEELP	6872.61	8590.53	11385.2	21687.2	13335.4	18329.6	Quantified	GO:0032012(BP:regulation of ARF protein signal transduction);GO:0005086(MF:ARF guanyl-nucleotide exchange factor activity)				PF12783(Guanine nucleotide exchange factor in Golgi transport N-terminal);PF01369(Sec7 domain)
A0A3Q0IYV6	A0A3Q0IYV6|A0A3Q0IYV6_DIACI	S	ATSTILADNNIETLS(+79.97)K	15	16	Titin homolog OS=Diaphorina citri OX=121845 GN=LOC103509514 PE=4 SV=1	Titin homolog	LOC103509514	65.38	1769.84	1.6	1094	1109	S15:Phosphorylation (STY):5.99	S1108	NNIETLSKHSSHS	10796.2	9366.97	8889.48	5813.14	6613.13	4417.64	Quantified	GO:0005856(CC:cytoskeleton);GO:0003779(MF:actin binding);GO:0005198(MF:structural molecule activity)				PF05902(4.1 protein C-terminal domain (CTD));PF09379(FERM N-terminal domain)
A0A3Q0IZP5	A0A3Q0IZP5|A0A3Q0IZP5_DIACI	T	ATT(+79.97)PVPS(+79.97)QR	3	9	Glycogen [starch] synthase OS=Diaphorina citri OX=121845 GN=LOC103512410 PE=3 SV=1	Glycogen [starch] synthase	LOC103512410	47.03	1115.44	-1.7	2822	2830	T3:Phosphorylation (STY):12.28;S7:Phosphorylation (STY):48.91	T2824	SSSRATTPVPSQR	1208.72	1835.78	9772.81	41000.9	19085.2	12093.8	Quantified	GO:0005978(BP:glycogen biosynthetic process);GO:0004373(MF:glycogen (starch) synthase activity)	K00693(NA)	ko00500(Starch and sucrose metabolism);ko04151(PI3K-Akt signaling pathway);ko04152(AMPK signaling pathway)		PF05693(Glycogen synthase)
A0A3Q0IZP5	A0A3Q0IZP5|A0A3Q0IZP5_DIACI	S	ATT(+79.97)PVPS(+79.97)QR	7	9	Glycogen [starch] synthase OS=Diaphorina citri OX=121845 GN=LOC103512410 PE=3 SV=1	Glycogen [starch] synthase	LOC103512410	47.03	1115.44	-1.7	2822	2830	T3:Phosphorylation (STY):12.28;S7:Phosphorylation (STY):48.91	S2828	ATTPVPSQRNSDD	1208.72	1835.78	9772.81	41000.9	19085.2	12093.8	Quantified	GO:0005978(BP:glycogen biosynthetic process);GO:0004373(MF:glycogen (starch) synthase activity)	K00693(NA)	ko00500(Starch and sucrose metabolism);ko04151(PI3K-Akt signaling pathway);ko04152(AMPK signaling pathway)		PF05693(Glycogen synthase)
A0A1S3DA59	A0A1S3DA59|A0A1S3DA59_DIACI:A0A1S4EHR3|A0A1S4EHR3_DIACI:A0A1S3DA52|A0A1S3DA52_DIACI	S	ATTEEPEES(+79.97)KKEDEY(+79.97)VTDEDNDK	9	23	Uncharacterized abhydrolase domain-containing protein DDB_G0269086-like isoform X3 OS=Diaphorina citri OX=121845 GN=LOC103514494 PE=4 SV=1	Uncharacterized abhydrolase domain-containing protein DDB_G0269086-like isoform X3	LOC103514494	34.22	2860.07	-3.2	335	357	S9:Phosphorylation (STY):0.00;Y15:Phosphorylation (STY):0.00	S343	TEEPEESKKEDEY	9258.76	26013	4505.83	4563.88	1972.54	757.9	Quantified	GO:0016787(MF:hydrolase activity)
A0A1S3DA59	A0A1S3DA59|A0A1S3DA59_DIACI:A0A1S4EHR3|A0A1S4EHR3_DIACI:A0A1S3DA52|A0A1S3DA52_DIACI	Y	ATTEEPEES(+79.97)KKEDEY(+79.97)VTDEDNDK	15	23	Uncharacterized abhydrolase domain-containing protein DDB_G0269086-like isoform X3 OS=Diaphorina citri OX=121845 GN=LOC103514494 PE=4 SV=1	Uncharacterized abhydrolase domain-containing protein DDB_G0269086-like isoform X3	LOC103514494	34.22	2860.07	-3.2	335	357	S9:Phosphorylation (STY):0.00;Y15:Phosphorylation (STY):0.00	Y349	SKKEDEYVTDEDN	9258.76	26013	4505.83	4563.88	1972.54	757.9	Quantified	GO:0016787(MF:hydrolase activity)
A0A1S3DA59	A0A1S3DA59|A0A1S3DA59_DIACI:A0A1S4EHR3|A0A1S4EHR3_DIACI:A0A1S3DA52|A0A1S3DA52_DIACI	S	ATTEEPEES(+79.97)KKEDEYVT(+79.97)DEDNDK	9	23	Uncharacterized abhydrolase domain-containing protein DDB_G0269086-like isoform X3 OS=Diaphorina citri OX=121845 GN=LOC103514494 PE=4 SV=1	Uncharacterized abhydrolase domain-containing protein DDB_G0269086-like isoform X3	LOC103514494	51.54	2860.07	-0.2	335	357	S9:Phosphorylation (STY):6.67;T17:Phosphorylation (STY):8.22	S343	TEEPEESKKEDEY	6741.79	875.73	12237.1	91341.6	25551.6	35582.2	Quantified	GO:0016787(MF:hydrolase activity)
A0A1S3DA59	A0A1S3DA59|A0A1S3DA59_DIACI:A0A1S4EHR3|A0A1S4EHR3_DIACI:A0A1S3DA52|A0A1S3DA52_DIACI	T	ATTEEPEES(+79.97)KKEDEYVT(+79.97)DEDNDK	17	23	Uncharacterized abhydrolase domain-containing protein DDB_G0269086-like isoform X3 OS=Diaphorina citri OX=121845 GN=LOC103514494 PE=4 SV=1	Uncharacterized abhydrolase domain-containing protein DDB_G0269086-like isoform X3	LOC103514494	51.54	2860.07	-0.2	335	357	S9:Phosphorylation (STY):6.67;T17:Phosphorylation (STY):8.22	T351	KEDEYVTDEDNDK	6741.79	875.73	12237.1	91341.6	25551.6	35582.2	Quantified	GO:0016787(MF:hydrolase activity)
A0A1S3DA59	A0A1S3DA59|A0A1S3DA59_DIACI:A0A1S4EHR3|A0A1S4EHR3_DIACI:A0A1S3DA52|A0A1S3DA52_DIACI	S	ATTEEPEES(+79.97)KKEDEYVTDEDNDK	9	23	Uncharacterized abhydrolase domain-containing protein DDB_G0269086-like isoform X3 OS=Diaphorina citri OX=121845 GN=LOC103514494 PE=4 SV=1	Uncharacterized abhydrolase domain-containing protein DDB_G0269086-like isoform X3	LOC103514494	43.71	2780.11	0.5	335	357	S9:Phosphorylation (STY):16.36	S343	TEEPEESKKEDEY	2952.15	832.984	8154.69	25120.2	9700.53	4551.32	Quantified	GO:0016787(MF:hydrolase activity)
A0A1S3DA59	A0A1S3DA59|A0A1S3DA59_DIACI:A0A1S4EHR3|A0A1S4EHR3_DIACI:A0A1S3DA52|A0A1S3DA52_DIACI	Y	ATTEEPEESKKEDEY(+79.97)VT(+79.97)DEDNDK	15	23	Uncharacterized abhydrolase domain-containing protein DDB_G0269086-like isoform X3 OS=Diaphorina citri OX=121845 GN=LOC103514494 PE=4 SV=1	Uncharacterized abhydrolase domain-containing protein DDB_G0269086-like isoform X3	LOC103514494	33.23	2860.07	0.1	335	357	Y15:Phosphorylation (STY):0.00;T17:Phosphorylation (STY):0.00	Y349	SKKEDEYVTDEDN	896.697	5313.98	8684.42	91341.6	8280.78	35582.2	Quantified	GO:0016787(MF:hydrolase activity)
A0A1S3DA59	A0A1S3DA59|A0A1S3DA59_DIACI:A0A1S4EHR3|A0A1S4EHR3_DIACI:A0A1S3DA52|A0A1S3DA52_DIACI	T	ATTEEPEESKKEDEY(+79.97)VT(+79.97)DEDNDK	17	23	Uncharacterized abhydrolase domain-containing protein DDB_G0269086-like isoform X3 OS=Diaphorina citri OX=121845 GN=LOC103514494 PE=4 SV=1	Uncharacterized abhydrolase domain-containing protein DDB_G0269086-like isoform X3	LOC103514494	33.23	2860.07	0.1	335	357	Y15:Phosphorylation (STY):0.00;T17:Phosphorylation (STY):0.00	T351	KEDEYVTDEDNDK	896.697	5313.98	8684.42	91341.6	8280.78	35582.2	Quantified	GO:0016787(MF:hydrolase activity)
A0A3Q0IZP5	A0A3Q0IZP5|A0A3Q0IZP5_DIACI	S	ATTPVPS(+79.97)QR	7	9	Glycogen [starch] synthase OS=Diaphorina citri OX=121845 GN=LOC103512410 PE=3 SV=1	Glycogen [starch] synthase	LOC103512410	35.24	1035.47	-2.8	2822	2830	S7:Phosphorylation (STY):25.70	S2828	ATTPVPSQRNSDD	1282.36	335.525	1286.78	8508.55	4196.29	3564.7	Quantified	GO:0005978(BP:glycogen biosynthetic process);GO:0004373(MF:glycogen (starch) synthase activity)	K00693(NA)	ko00500(Starch and sucrose metabolism);ko04151(PI3K-Akt signaling pathway);ko04152(AMPK signaling pathway)		PF05693(Glycogen synthase)
A0A3Q0IZP5	A0A3Q0IZP5|A0A3Q0IZP5_DIACI	S	ATTPVPS(+79.97)QRNS(+79.97)DDEDSVDDESER	7	23	Glycogen [starch] synthase OS=Diaphorina citri OX=121845 GN=LOC103512410 PE=3 SV=1	Glycogen [starch] synthase	LOC103512410	26.67	2708.01	1.4	2822	2844	S7:Phosphorylation (STY):0.00;S11:Phosphorylation (STY):0.00	S2828	ATTPVPSQRNSDD	121.134	308.47	1222.93	642.939	2584.72	1112.38	Quantified	GO:0005978(BP:glycogen biosynthetic process);GO:0004373(MF:glycogen (starch) synthase activity)	K00693(NA)	ko00500(Starch and sucrose metabolism);ko04151(PI3K-Akt signaling pathway);ko04152(AMPK signaling pathway)		PF05693(Glycogen synthase)
A0A3Q0IZP5	A0A3Q0IZP5|A0A3Q0IZP5_DIACI	S	ATTPVPS(+79.97)QRNS(+79.97)DDEDSVDDESER	11	23	Glycogen [starch] synthase OS=Diaphorina citri OX=121845 GN=LOC103512410 PE=3 SV=1	Glycogen [starch] synthase	LOC103512410	26.67	2708.01	1.4	2822	2844	S7:Phosphorylation (STY):0.00;S11:Phosphorylation (STY):0.00	S2832	VPSQRNSDDEDSV	121.134	308.47	1222.93	642.939	2584.72	1112.38	Quantified	GO:0005978(BP:glycogen biosynthetic process);GO:0004373(MF:glycogen (starch) synthase activity)	K00693(NA)	ko00500(Starch and sucrose metabolism);ko04151(PI3K-Akt signaling pathway);ko04152(AMPK signaling pathway)		PF05693(Glycogen synthase)
A0A3Q0IZP5	A0A3Q0IZP5|A0A3Q0IZP5_DIACI	S	ATTPVPS(+79.97)QRNSDDEDS(+79.97)VDDESER	7	23	Glycogen [starch] synthase OS=Diaphorina citri OX=121845 GN=LOC103512410 PE=3 SV=1	Glycogen [starch] synthase	LOC103512410	50.48	2708.01	4.8	2822	2844	S7:Phosphorylation (STY):0.00;S16:Phosphorylation (STY):3.36	S2828	ATTPVPSQRNSDD	97.791	132.549	651.869	335.591	1149.03	1112.38	Quantified	GO:0005978(BP:glycogen biosynthetic process);GO:0004373(MF:glycogen (starch) synthase activity)	K00693(NA)	ko00500(Starch and sucrose metabolism);ko04151(PI3K-Akt signaling pathway);ko04152(AMPK signaling pathway)		PF05693(Glycogen synthase)
A0A3Q0IZP5	A0A3Q0IZP5|A0A3Q0IZP5_DIACI	S	ATTPVPS(+79.97)QRNSDDEDS(+79.97)VDDESER	16	23	Glycogen [starch] synthase OS=Diaphorina citri OX=121845 GN=LOC103512410 PE=3 SV=1	Glycogen [starch] synthase	LOC103512410	50.48	2708.01	4.8	2822	2844	S7:Phosphorylation (STY):0.00;S16:Phosphorylation (STY):3.36	S2837	NSDDEDSVDDESE	97.791	132.549	651.869	335.591	1149.03	1112.38	Quantified	GO:0005978(BP:glycogen biosynthetic process);GO:0004373(MF:glycogen (starch) synthase activity)	K00693(NA)	ko00500(Starch and sucrose metabolism);ko04151(PI3K-Akt signaling pathway);ko04152(AMPK signaling pathway)		PF05693(Glycogen synthase)
A0A3Q0IRP6	A0A3Q0IRP6|A0A3Q0IRP6_DIACI	S	ATVDISS(+79.97)PPR	7	10	Rac GTPase-activating protein 1-like OS=Diaphorina citri OX=121845 GN=LOC103508591 PE=4 SV=1	Rac GTPase-activating protein 1-like	LOC103508591	45.52	1121.51	7.9	234	243	S7:Phosphorylation (STY):0.00	S240	ATVDISSPPRKTK	72.8239			431.627	89.8578	259.837	Quantified	GO:0035556(BP:intracellular signal transduction)				PF00620(RhoGAP domain)
A0A3Q0IRP6	A0A3Q0IRP6|A0A3Q0IRP6_DIACI	S	ATVDISS(+79.97)PPRK	7	11	Rac GTPase-activating protein 1-like OS=Diaphorina citri OX=121845 GN=LOC103508591 PE=4 SV=1	Rac GTPase-activating protein 1-like	LOC103508591	54.52	1249.61	1.3	234	244	S7:Phosphorylation (STY):9.34	S240	ATVDISSPPRKTK	1305.02	977.195	1760.55	4468.25	1683.77	2568.83	Quantified	GO:0035556(BP:intracellular signal transduction)				PF00620(RhoGAP domain)
A0A3Q0JD23	A0A3Q0JD23|A0A3Q0JD23_DIACI	S	ATVVQS(+79.97)PQEPIS(+79.97)VTETISEDTVLDLPQEK	6	29	Titin OS=Diaphorina citri OX=121845 GN=LOC103518851 PE=4 SV=1	Titin	LOC103518851	60.14	3312.53	1.2	5668	5696	S6:Phosphorylation (STY):11.12;S12:Phosphorylation (STY):0.00	S5673	RATVVQSPQEPIS	235.25	294.93	3003.76	449.007	8420.88	5873.8	Quantified					PF07679(Immunoglobulin I-set domain)
A0A3Q0JD23	A0A3Q0JD23|A0A3Q0JD23_DIACI	S	ATVVQS(+79.97)PQEPIS(+79.97)VTETISEDTVLDLPQEK	12	29	Titin OS=Diaphorina citri OX=121845 GN=LOC103518851 PE=4 SV=1	Titin	LOC103518851	60.14	3312.53	1.2	5668	5696	S6:Phosphorylation (STY):11.12;S12:Phosphorylation (STY):0.00	S5679	SPQEPISVTETIS	235.25	294.93	3003.76	449.007	8420.88	5873.8	Quantified					PF07679(Immunoglobulin I-set domain)
A0A3Q0JD23	A0A3Q0JD23|A0A3Q0JD23_DIACI	S	ATVVQS(+79.97)PQEPISVT(+79.97)ETISEDTVLDLPQEK	6	29	Titin OS=Diaphorina citri OX=121845 GN=LOC103518851 PE=4 SV=1	Titin	LOC103518851	54.89	3312.53	2.3	5668	5696	S6:Phosphorylation (STY):13.13;T14:Phosphorylation (STY):0.00	S5673	RATVVQSPQEPIS	476.818	1355.42	410.901	262.385	8420.88	5873.8	Quantified					PF07679(Immunoglobulin I-set domain)
A0A3Q0JD23	A0A3Q0JD23|A0A3Q0JD23_DIACI	T	ATVVQS(+79.97)PQEPISVT(+79.97)ETISEDTVLDLPQEK	14	29	Titin OS=Diaphorina citri OX=121845 GN=LOC103518851 PE=4 SV=1	Titin	LOC103518851	54.89	3312.53	2.3	5668	5696	S6:Phosphorylation (STY):13.13;T14:Phosphorylation (STY):0.00	T5681	QEPISVTETISED	476.818	1355.42	410.901	262.385	8420.88	5873.8	Quantified					PF07679(Immunoglobulin I-set domain)
A0A3Q0JD23	A0A3Q0JD23|A0A3Q0JD23_DIACI	S	ATVVQS(+79.97)PQEPISVTET(+79.97)ISEDTVLDLPQEK	6	29	Titin OS=Diaphorina citri OX=121845 GN=LOC103518851 PE=4 SV=1	Titin	LOC103518851	55.52	3312.53	3.6	5668	5696	S6:Phosphorylation (STY):11.12;T16:Phosphorylation (STY):0.00	S5673	RATVVQSPQEPIS	235.25	294.93	410.901	276.795	1779.14	80.5698	Quantified					PF07679(Immunoglobulin I-set domain)
A0A3Q0JD23	A0A3Q0JD23|A0A3Q0JD23_DIACI	T	ATVVQS(+79.97)PQEPISVTET(+79.97)ISEDTVLDLPQEK	16	29	Titin OS=Diaphorina citri OX=121845 GN=LOC103518851 PE=4 SV=1	Titin	LOC103518851	55.52	3312.53	3.6	5668	5696	S6:Phosphorylation (STY):11.12;T16:Phosphorylation (STY):0.00	T5683	PISVTETISEDTV	235.25	294.93	410.901	276.795	1779.14	80.5698	Quantified					PF07679(Immunoglobulin I-set domain)
A0A3Q0JD23	A0A3Q0JD23|A0A3Q0JD23_DIACI	S	ATVVQS(+79.97)PQEPISVTETISEDTVLDLPQEK	6	29	Titin OS=Diaphorina citri OX=121845 GN=LOC103518851 PE=4 SV=1	Titin	LOC103518851	71.39	3232.56	0.8	5668	5696	S6:Phosphorylation (STY):22.09	S5673	RATVVQSPQEPIS	1824.74	6001.8	2811.17	293.899	21593.9	4738.12	Quantified					PF07679(Immunoglobulin I-set domain)
A0A3Q0JD23	A0A3Q0JD23|A0A3Q0JD23_DIACI	S	ATVVQSPQEPIS(+79.97)VTETISEDTVLDLPQEK	12	29	Titin OS=Diaphorina citri OX=121845 GN=LOC103518851 PE=4 SV=1	Titin	LOC103518851	69.38	3232.56	4.3	5668	5696	S12:Phosphorylation (STY):0.00	S5679	SPQEPISVTETIS	351.366	653.458	1073.39		11317.1	290.769	Quantified					PF07679(Immunoglobulin I-set domain)
A0A3Q0JD23	A0A3Q0JD23|A0A3Q0JD23_DIACI	T	ATVVQSPQEPISVT(+79.97)ETISEDTVLDLPQEK	14	29	Titin OS=Diaphorina citri OX=121845 GN=LOC103518851 PE=4 SV=1	Titin	LOC103518851	66.77	3232.56	2.6	5668	5696	T14:Phosphorylation (STY):0.00	T5681	QEPISVTETISED	1761.35	1134.51	45.8813	972.269	1587.79	1046.62	Quantified					PF07679(Immunoglobulin I-set domain)
A0A3Q0JD23	A0A3Q0JD23|A0A3Q0JD23_DIACI	S	ATVVQSPQEPISVTETIS(+79.97)EDTVLDLPQEK	18	29	Titin OS=Diaphorina citri OX=121845 GN=LOC103518851 PE=4 SV=1	Titin	LOC103518851	48.15	3232.56	4.2	5668	5696	S18:Phosphorylation (STY):0.00	S5685	SVTETISEDTVLD	351.366	612.802	90.1178		1784.51	353.137	Quantified					PF07679(Immunoglobulin I-set domain)
A0A3Q0JD23	A0A3Q0JD23|A0A3Q0JD23_DIACI	T	ATVVQSPQEPISVTETISEDT(+79.97)VLDLPQEK	21	29	Titin OS=Diaphorina citri OX=121845 GN=LOC103518851 PE=4 SV=1	Titin	LOC103518851	39.5	3232.56	7.9	5668	5696	T21:Phosphorylation (STY):0.00	T5688	ETISEDTVLDLPQ	94.0634				861.313	108.091	Quantified					PF07679(Immunoglobulin I-set domain)
A0A3Q0J5R5	A0A3Q0J5R5|A0A3Q0J5R5_DIACI:A0A3Q0J0R2|A0A3Q0J0R2_DIACI	T	AVAADT(+79.97)PPSQSGDAGSQPNR	6	20	TOM1-like protein 2 isoform X1 OS=Diaphorina citri OX=121845 GN=LOC103512928 PE=3 SV=1	TOM1-like protein 2 isoform X1	LOC103512928	46.07	2004.85	4.9	461	480	T6:Phosphorylation (STY):13.38	T466	RAVAADTPPSQSG	235.246	96.3331	1066.31	2888.69	988.68	1508.29	Quantified	GO:0006886(BP:intracellular protein transport)				PF00790(VHS domain);PF03127(GAT domain)
A0A3Q0J016	A0A3Q0J016|A0A3Q0J016_DIACI	Y	AVC(+57.02)NTY(+79.97)LQSR	6	10	Homeodomain-interacting protein kinase 2 OS=Diaphorina citri OX=121845 GN=LOC103512605 PE=4 SV=1	Homeodomain-interacting protein kinase 2	LOC103512605	50.35	1290.54	2	78	87	C3:Carbamidomethylation:1000.00;Y6:Phosphorylation (STY):17.01	Y83	KAVCNTYLQSRYY	364.532	531.232	818.939	528.257	787.595	143.408	Quantified	GO:0005524(MF:ATP binding);GO:0003677(MF:DNA binding);GO:0004672(MF:protein kinase activity)				PF00069(Protein kinase domain)
A0A3Q0J0C2	A0A3Q0J0C2|A0A3Q0J0C2_DIACI	S	AVDPILQDS(+79.97)PEK	9	12	Uncharacterized protein LOC103512695 OS=Diaphorina citri OX=121845 GN=LOC103512695 PE=4 SV=1	Uncharacterized protein LOC103512695	LOC103512695	57.41	1390.64	-2.3	936	947		S944	DPILQDSPEKASV	1253.07	734.877	573.521	1341.6	1023.93	1123.54	Quantified
A0A3Q0IQT8	A0A3Q0IQT8|A0A3Q0IQT8_DIACI	S	AVDPVDKQS(+79.97)EEM(+15.99)VGK	9	15	Uncharacterized protein LOC103506019 OS=Diaphorina citri OX=121845 GN=LOC103506019 PE=4 SV=1	Uncharacterized protein LOC103506019	LOC103506019	34.97	1726.75	2.6	809	823		S817	DPVDKQSEEMVGK	717.763	521.3	3805.78	3500.79	2422.6	3429.88	Quantified
A0A3Q0IQT8	A0A3Q0IQT8|A0A3Q0IQT8_DIACI	S	AVDPVDKQS(+79.97)EEMVGK	9	15	Uncharacterized protein LOC103506019 OS=Diaphorina citri OX=121845 GN=LOC103506019 PE=4 SV=1	Uncharacterized protein LOC103506019	LOC103506019	57.94	1710.75	2.1	809	823		S817	DPVDKQSEEMVGK	1088.34	4392.99	1111.28	14280.2	5013.33	11731.2	Quantified
A0A1S4E9K5	A0A1S4E9K5|A0A1S4E9K5_DIACI	Y	AVEM(+15.99)NPTNPM(+15.99)TLHTLAMFY(+79.97)ER	19	21	Uncharacterized protein LOC103507486 isoform X1 OS=Diaphorina citri OX=121845 GN=LOC103507486 PE=4 SV=2	Uncharacterized protein LOC103507486 isoform X1	LOC103507486	27.18	2577.11	10.5	319	339	M4:Oxidation (M):46.20;M10:Oxidation (M):8.82;Y19:Phosphorylation (STY):6.69	Y337	HTLAMFYERHELD	447.397	190.959	1024.35	477.732	475.343	439.091	Quantified
A0A3Q0JJG4	A0A3Q0JJG4|A0A3Q0JJG4_DIACI	S	AVES(+79.97)EEEEEDVPTK	4	14	Cilia- and flagella-associated protein 251-like OS=Diaphorina citri OX=121845 GN=LOC113472939 PE=4 SV=1	Cilia- and flagella-associated protein 251-like	LOC113472939	41.58	1669.66	-1.5	198	211	S4:Phosphorylation (STY):37.64	S201	GKKAVESEEEEED	439.844	315.828	131.346	516.92	81.6439	273.216	Quantified	GO:0031514(CC:motile cilium)
A0A3Q0IZP5	A0A3Q0IZP5|A0A3Q0IZP5_DIACI	T	AVFPDLEVEDDDT(+79.97)DSGYGGR	13	20	Glycogen [starch] synthase OS=Diaphorina citri OX=121845 GN=LOC103512410 PE=3 SV=1	Glycogen [starch] synthase	LOC103512410	77.09	2235.88	2.7	2785	2804	T13:Phosphorylation (STY):0.00	T2797	EVEDDDTDSGYGG	40333.2	73236.4	82786	88936.6	684.314	54074.6	Quantified	GO:0005978(BP:glycogen biosynthetic process);GO:0004373(MF:glycogen (starch) synthase activity)	K00693(NA)	ko00500(Starch and sucrose metabolism);ko04151(PI3K-Akt signaling pathway);ko04152(AMPK signaling pathway)		PF05693(Glycogen synthase)
A0A3Q0IZP5	A0A3Q0IZP5|A0A3Q0IZP5_DIACI	S	AVFPDLEVEDDDTDS(+79.97)GYGGR	15	20	Glycogen [starch] synthase OS=Diaphorina citri OX=121845 GN=LOC103512410 PE=3 SV=1	Glycogen [starch] synthase	LOC103512410	91.3	2235.88	3.5	2785	2804	S15:Phosphorylation (STY):20.41	S2799	EDDDTDSGYGGRF	40333.2	73236.4	82786	88936.6	59463.7	54074.6	Quantified	GO:0005978(BP:glycogen biosynthetic process);GO:0004373(MF:glycogen (starch) synthase activity)	K00693(NA)	ko00500(Starch and sucrose metabolism);ko04151(PI3K-Akt signaling pathway);ko04152(AMPK signaling pathway)		PF05693(Glycogen synthase)
A0A3Q0IUG5	A0A3Q0IUG5|A0A3Q0IUG5_DIACI:A0A3Q0INX8|A0A3Q0INX8_DIACI	S	AVGDLGSS(+79.97)PSR	8	11	Leupaxin isoform X1 OS=Diaphorina citri OX=121845 GN=LOC103507300 PE=4 SV=1	Leupaxin isoform X1	LOC103507300	35.27	1124.49	-1.8	141	151	S8:Phosphorylation (STY):0.00	S148	VGDLGSSPSRKDA	1026.98	289.003	162.523	554.316	223.246	178.347	Quantified	GO:0046872(MF:metal ion binding)	K05760(NA)	ko04370(VEGF signaling pathway);ko04510(Focal adhesion);ko04810(Regulation of actin cytoskeleton)	Cytoplasm;cytoskeleton	PF00412(LIM domain)
[truncated: 10,763 more rows]
