# Supplementary material for: An integrated proteomic and phosphoproteomic analysis reveals α-crystallin A and vitellogenin A1 as key players involved in CLas infection in Diaphorina citri
Source: Research Square preprint supplement (doi:10.21203/rs.3.rs-7919843/v1), 2026-01-30
Supplement: Supplementary file 3 [file db0703a690d8831d05cdb328.docx]

Table S1. All primers used in this study.

| **Primers** | **Sequences** | **Purposes** |
| --- | --- | --- |
| ds*Vg-A1*-F | GGATCCTAATACGACTCACTATAGGACTGGAAGCCGCCACTCA | dsRNA synthesis |
| ds*Vg-A1*-R | GGATCCTAATACGACTCACTATAGGGACAGGGGTCCGAAAGCA |
| ds*αA-crystalin*-F | GGATCCTAATACGACTCACTATAGGAGTGGTGGACGATTTCAT |
| ds*αA-crystalin*-R | GGATCCTAATACGACTCACTATAGGTTTTCCTCCGTTCTTGTT |
| ds*GFP*-F | GGATCCTAATACGACTCACTATAGGCAGTGCTTCAGCCGCTACCC |
| ds*GFP*-R | GGATCCTAATACGACTCACTATAGGACTCCAGCAGGACCATGTGAT |
| *Vg-A1*-F | AAAGATACATCCCATACTTG | RT-qPCR analysis |
| *Vg-A1*-R | GGAATACAGCAGCACAAC |
| *αA-crystalin*-F | TGGCTCATCCGAACATTT |
| *αA-crystalin*-R | AGTTGGACACCCCGCTCT |
| *Tret1*-F | CCAACGAGGCAAAGGAAAAT |
| *Tret1*-R | GCATAATAAATGGGCGAAGGA |
| *LOC103509854*-F | CCCTCTTCCGAATCCAAATGA |
| *LOC103509854*-R | GATGCGATACTTCCGTGTCTAAC |
| *ZFP319*-F | CTGTTCCGTTGTCAGGTTTGTTC |
| *ZFP319*-R | TAGGTTCCTCTGGTTGGGTATTT |
| *LOC113471498-*F | TCCAAGGAAAAAACTGTGGGTAAA |
| *LOC113471498-*R | TCTCCTTTTGGTTTGTTCTCTGC |
| *Ago-2-*F | GACCATTGCCTCATCTTCTTCC |
| *Ago-2-*R | TTCGTGTCCACTTGGGTTCTCC |
| *GAPDH*-F | CATGGCAAGTTCAACGGTGA |
| *GAPDH*-R | CGATGCCTTCTCAATGGTGG |
