# Supplementary material for: An integrated proteomic and phosphoproteomic analysis reveals α-crystallin A and vitellogenin A1 as key players involved in CLas infection in Diaphorina citri
Source: Research Square preprint supplement (doi:10.21203/rs.3.rs-7919843/v1), 2026-01-30
Supplement: Supplementary file 4 [file dc02a783aae1ec4b83fc02da.xlsx]

## Sheet: A
Protein	Proteins	Amino acid	Modified peptide	Position in peptide	Sequence length	Description	Protein Name	Gene Name	-10LgP	Mass	ppm	Start	End	AScore	PTMLocation	MotifSequence	Intensity infected-1	Intensity infected-2	Intensity infected-3	average B	Intensity free-1	Intensity free-2	Intensity free-3	average A	B/A	t test p value
A0A3Q0INY9	A0A3Q0INY9|A0A3Q0INY9_DIACI	S	EKS(+79.97)PAPAEKPAPVTPATK	3	18	Proteoglycan 4-like OS=Diaphorina citri OX=121845 GN=LOC103524980 PE=4 SV=1	Proteoglycan 4-like	LOC103524980	69.49	1897.95	-2.3	390	407	S3:Phosphorylation (STY):108.98	S392	ETGKEKSPAPAEK	60502.5	50349.6		55426.1	188.47	111.911	216.261	172.214	321.844	0.000696551
A0A3Q0ILW3	A0A3Q0ILW3|A0A3Q0ILW3_DIACI:A0A1S3D0N5|A0A1S3D0N5_DIACI:A0A1S3D6W1|A0A1S3D6W1_DIACI	Y	ALSNLESIPGGYSALQRMY(+79.97)R	19	20	Ubiquilin-1 OS=Diaphorina citri OX=121845 GN=LOC103506324 PE=4 SV=1	Ubiquilin-1	LOC103506324	24.4	2305.09	5.1	203	222	Y19:Phosphorylation (STY):10.92	Y221	SALQRMYRDIQEP	7868.92	7269.77	8801.66	7980.12		54.667	63.658	59.1625	134.885	0.000829611
A0A3Q0J5H7	A0A3Q0J5H7|A0A3Q0J5H7_DIACI	T	QNT(+79.97)FEPK	3	7	PDZ and LIM domain protein Zasp-like OS=Diaphorina citri OX=121845 GN=LOC103515161 PE=4 SV=1	PDZ and LIM domain protein Zasp-like	LOC103515161	43.97	942.385	-1.8	786	792		T788	KFERQNTFEPKSD	31551.7	31364.4	24144.4	29020.2	677.018		337.676	507.347	57.1999	0.00284943
A0A3Q0ISF0	A0A3Q0ISF0|A0A3Q0ISF0_DIACI:A0A3Q0JB07|A0A3Q0JB07_DIACI:A0A3Q0IMP1|A0A3Q0IMP1_DIACI	S	EVDS(+79.97)PEVK	4	8	Uncharacterized protein LOC103506770 OS=Diaphorina citri OX=121845 GN=LOC103506770 PE=4 SV=1	Uncharacterized protein LOC103506770	LOC103506770	54.21	981.406	1.8	67	74		S70	LKKEVDSPEVKAK	39382.3	20411.4	24574.9	28122.8	2146.31	259.34	477.42	961.023	29.2635	0.00935479
A0A3Q0J8I4	A0A3Q0J8I4|A0A3Q0J8I4_DIACI	S	TQS(+79.97)SSSIATEDGDTK	3	15	Dentin sialophosphoprotein-like OS=Diaphorina citri OX=121845 GN=LOC113469479 PE=4 SV=1	Dentin sialophosphoprotein-like	LOC113469479	67.91	1605.64	-0.7	80	94	S3:Phosphorylation (STY):14.04	S82	KIIKTQSSSSIAT	11973.4	10949.8		11461.6	256.707	66.686	898.358	407.25	28.1439	0.000203816
A0A3Q0J564	A0A3Q0J564|A0A3Q0J564_DIACI:A0A3Q0JA89|A0A3Q0JA89_DIACI	S	VFEVSLADLQS(+79.97)DQDAER	11	17	Small ribosomal subunit protein eS1 OS=Diaphorina citri OX=121845 GN=LOC103515015 PE=3 SV=1	Small ribosomal subunit protein eS1	LOC103515015	66.02	2000.87	5.5	60	76	S11:Phosphorylation (STY):134.33	S70	SLADLQSDQDAER	3003.72	1100.95	1671.6	1925.42	60.2116	47.2574	135.457	80.9754	23.7779	0.0308517
A0A1S3DU41	A0A1S3DU41|A0A1S3DU41_DIACI	T	SEPSQNVVT(+79.97)PPWVKPS(+79.97)PPSTPSHSTINK	9	28	Adhesive plaque matrix protein-like OS=Diaphorina citri OX=121845 GN=LOC103524757 PE=4 SV=1	Adhesive plaque matrix protein-like	LOC103524757	37.84	3157.45	1.6	224	251	T9:Phosphorylation (STY):0.00;S16:Phosphorylation (STY):0.00	T232	PSQNVVTPPWVKP	65483	58116.1	57652	60417	857.901	4993.84	2498.91	2783.55	21.705	3.32379e-05
A0A1S3DU41	A0A1S3DU41|A0A1S3DU41_DIACI	S	SEPSQNVVT(+79.97)PPWVKPS(+79.97)PPSTPSHSTINK	16	28	Adhesive plaque matrix protein-like OS=Diaphorina citri OX=121845 GN=LOC103524757 PE=4 SV=1	Adhesive plaque matrix protein-like	LOC103524757	37.84	3157.45	1.6	224	251	T9:Phosphorylation (STY):0.00;S16:Phosphorylation (STY):0.00	S239	PPWVKPSPPSTPS	65483	58116.1	57652	60417	857.901	4993.84	2498.91	2783.55	21.705	3.32379e-05
A0A3Q0IZP5	A0A3Q0IZP5|A0A3Q0IZP5_DIACI	S	NS(+79.97)DDEDSVDDESERAELNLPR	2	21	Glycogen [starch] synthase OS=Diaphorina citri OX=121845 GN=LOC103512410 PE=3 SV=1	Glycogen [starch] synthase	LOC103512410	26.06	2483.99	3.7	2831	2851	S2:Phosphorylation (STY):23.70	S2832	VPSQRNSDDEDSV		2533.46	1468.72	2001.09	107.331	69.8428	110.33	95.8345	20.8807	0.0172356
A0A3Q0ITT6	A0A3Q0ITT6|A0A3Q0ITT6_DIACI	S	RDS(+79.97)IADQK	3	8	Uncharacterized protein LOC103509596 OS=Diaphorina citri OX=121845 GN=LOC103509596 PE=4 SV=1	Uncharacterized protein LOC103509596	LOC103509596	45.25	1011.44	1	458	465		S460	VQEKRDSIADQKN		34121.1	22038.8	28080		2552.98	206.146	1379.56	20.3543	0.0492337
A0A1S3CY59	A0A1S3CY59|A0A1S3CY59_DIACI	S	SVEDVKS(+79.97)DEDQGGEEKDS(+79.97)AEVTDSK	7	25	Sarcalumenin OS=Diaphorina citri OX=121845 GN=LOC103507509 PE=4 SV=1	Sarcalumenin	LOC103507509	41.96	2842.1	0.7	212	236	S7:Phosphorylation (STY):4.12;S18:Phosphorylation (STY):12.15	S218	SVEDVKSDEDQGG	50563	32362.9	52107.9	45011.3	2042.63	439.867	4345.21	2275.9	19.7773	0.00267668
A0A1S3CY59	A0A1S3CY59|A0A1S3CY59_DIACI	S	SVEDVKS(+79.97)DEDQGGEEKDS(+79.97)AEVTDSK	18	25	Sarcalumenin OS=Diaphorina citri OX=121845 GN=LOC103507509 PE=4 SV=1	Sarcalumenin	LOC103507509	41.96	2842.1	0.7	212	236	S7:Phosphorylation (STY):4.12;S18:Phosphorylation (STY):12.15	S229	GGEEKDSAEVTDS	50563	32362.9	52107.9	45011.3	2042.63	439.867	4345.21	2275.9	19.7773	0.00267668
A0A3Q0IIL1	A0A3Q0IIL1|A0A3Q0IIL1_DIACI	S	HRS(+79.97)LVDVTK	3	9	Uncharacterized protein LOC103524929 OS=Diaphorina citri OX=121845 GN=LOC103524929 PE=4 SV=1	Uncharacterized protein LOC103524929	LOC103524929	46.58	1133.56	0.1	537	545	S3:Phosphorylation (STY):80.35	S539	SLWRHRSLVDVTK	4455.44	5001.52		4728.48	431.559	91.2473		261.403	18.0888	0.00514703
A0A3Q0ISF0	A0A3Q0ISF0|A0A3Q0ISF0_DIACI:A0A3Q0JB07|A0A3Q0JB07_DIACI:A0A3Q0IMP1|A0A3Q0IMP1_DIACI	T	T(+79.97)GEVSETVK	1	9	Uncharacterized protein LOC103506770 OS=Diaphorina citri OX=121845 GN=LOC103506770 PE=4 SV=1	Uncharacterized protein LOC103506770	LOC103506770	51.66	1028.44	3.7	43	51	T1:Phosphorylation (STY):58.99	T43	QVDSAKTGEVSET	18602	6413.73	10140.3	11718.7	1606.62	206.513	278.272	697.136	16.8097	0.0386862
A0A3Q0J532	A0A3Q0J532|A0A3Q0J532_DIACI:A0A1S3D7G8|A0A1S3D7G8_DIACI	S	S(+79.97)EINSEKLLDS(+79.97)AIK	1	14	Uncharacterized protein DDB_G0287625-like OS=Diaphorina citri OX=121845 GN=LOC103513023 PE=4 SV=1	Uncharacterized protein DDB_G0287625-like	LOC103513023	25.15	1705.76	-6.4	707	720	S1:Phosphorylation (STY):0.00;S11:Phosphorylation (STY):41.57	S707	KTEVTKSEINSEK	13177	5178.24	7802.97	8719.4	100.167	868.059	834.443	600.89	14.5108	0.0265514
A0A3Q0J532	A0A3Q0J532|A0A3Q0J532_DIACI:A0A1S3D7G8|A0A1S3D7G8_DIACI	S	S(+79.97)EINSEKLLDS(+79.97)AIK	11	14	Uncharacterized protein DDB_G0287625-like OS=Diaphorina citri OX=121845 GN=LOC103513023 PE=4 SV=1	Uncharacterized protein DDB_G0287625-like	LOC103513023	25.15	1705.76	-6.4	707	720	S1:Phosphorylation (STY):0.00;S11:Phosphorylation (STY):41.57	S717	SEKLLDSAIKINK	13177	5178.24	7802.97	8719.4	100.167	868.059	834.443	600.89	14.5108	0.0265514
A0A3Q0J699	A0A3Q0J699|A0A3Q0J699_DIACI	T	T(+79.97)VVTTPPPHSASPR	1	14	LIM domain and actin-binding protein 1 OS=Diaphorina citri OX=121845 GN=LOC103513156 PE=4 SV=1	LIM domain and actin-binding protein 1	LOC103513156	46.29	1525.73	-1.5	141	154	T1:Phosphorylation (STY):0.00	T141	DANAAKTVVTTPP	3462.21	1124.93	2135.46	2240.87	74.039	193.087	205.111	157.412	14.2356	0.0371963
A0A3Q0IVQ8	A0A3Q0IVQ8|A0A3Q0IVQ8_DIACI	T	KKST(+79.97)QEGADELEMK	4	14	LOW QUALITY PROTEIN: titin-like OS=Diaphorina citri OX=121845 GN=LOC103510529 PE=3 SV=1	LOW QUALITY PROTEIN: titin-like	LOC103510529	43.37	1672.74	0.1	3477	3490	T4:Phosphorylation (STY):0.00	T3480	TSRKKSTQEGADE	15339.1	8272.03	8904.25	10838.5	264.19	505.761	1573.65	781.2	13.8741	0.0118236
A0A3Q0J235	A0A3Q0J235|A0A3Q0J235_DIACI:A0A3Q0JK51|A0A3Q0JK51_DIACI	S	VDDLIYEYNPASPDNES(+79.97)AQNNNGK	17	24	Vitellogenin-like OS=Diaphorina citri OX=121845 GN=LOC113469177 PE=4 SV=1	Vitellogenin-like	LOC113469177	101.41	2746.14	-0.4	303	326	S17:Phosphorylation (STY):47.14	S319	ASPDNESAQNNNG	369788	133296	172658	225247	38955.5	12874.5	3355.87	18395.3	12.2448	0.0489102
A0A1S3CWW5	A0A1S3CWW5|A0A1S3CWW5_DIACI	S	HRPELIDYHKLS(+79.97)K	12	13	Alpha-actinin, sarcomeric-like OS=Diaphorina citri OX=121845 GN=LOC103506762 PE=4 SV=1	Alpha-actinin, sarcomeric-like	LOC103506762	56.02	1714.86	-7.7	188	200	S12:Phosphorylation (STY):11.59	S199	IDYHKLSKDNPLQ	2240.6	3928.65	3639.72	3269.66	85.6429	258.795	541.207	295.215	11.0755	0.00522491
A0A1S3DP24	A0A1S3DP24|A0A1S3DP24_DIACI	T	T(+79.97)SFDEEEDEEAER	1	13	Importin-4-like OS=Diaphorina citri OX=121845 GN=LOC103521443 PE=4 SV=2	Importin-4-like	LOC103521443	49.58	1664.57	2.8	238	250	T1:Phosphorylation (STY):0.00	T238	KTKAQRTSFDEEE	5814.28	5419.34	4019.69	5084.44	863.517	309.285	236.814	469.872	10.8209	0.00134572
A0A1S3D095	A0A1S3D095|A0A1S3D095_DIACI	S	RPS(+79.97)C(+57.02)TSAEFNSLVTNTK	3	17	Facilitated trehalose transporter Tret1-like OS=Diaphorina citri OX=121845 GN=LOC103508605 PE=3 SV=1	Facilitated trehalose transporter Tret1-like	LOC103508605	64.13	1990.88	-1.5	8	24	S3:Phosphorylation (STY):0.00;C4:Carbamidomethylation:1000.00	S10	HYDKRPSCTSAEF	18531.8	8989.12	18659.4	15393.4	708.227	1746.25	2261.66	1572.05	9.79198	0.0129221
A0A1S3DGK7	A0A1S3DGK7|A0A1S3DGK7_DIACI	S	SLS(+79.97)EEIAR	3	8	Uncharacterized protein LOC103518062 OS=Diaphorina citri OX=121845 GN=LOC103518062 PE=4 SV=1	Uncharacterized protein LOC103518062	LOC103518062	42.2	983.433	-0.6	324	331	S3:Phosphorylation (STY):0.00	S326	KRLRSLSEEIARH	1234.87	2088.51	2014.08	1779.15	275.334	53.0789	223.042	183.818	9.67887	0.00475681
A0A3R5VSH1	A0A3R5VSH1|A0A3R5VSH1_DIACI:A0A6G5VBL4|A0A6G5VBL4_DIACI	S	KS(+79.97)SEKPDIQYMIGEK	2	15	ATP-binding cassette sub-family D member 2 OS=Diaphorina citri OX=121845 GN=ABCD2 PE=2 SV=1	ATP-binding cassette sub-family D member 2	ABCD2	41.82	1831.84	-3.7	41	55	S2:Phosphorylation (STY):0.00	S42	KKSNRKSSEKPDI	19971	23146.4	18516.9	20544.8	527.861	3903.09	2191.29	2207.41	9.30718	0.000398766
A0A1S3DNM5	A0A1S3DNM5|A0A1S3DNM5_DIACI:A0A3Q0J1F3|A0A3Q0J1F3_DIACI	S	S(+79.97)SPPLLR	1	7	Kinesin-like protein unc-104 OS=Diaphorina citri OX=121845 GN=LOC103522067 PE=4 SV=2	Kinesin-like protein unc-104	LOC103522067	45.43	848.416	-2.7	37	43	S1:Phosphorylation (STY):0.00	S37	SLVDGRSSPPLLR	4298.9	2690.08	2783.33	3257.44	749.005	69.8749	237.811	352.23	9.24804	0.00657045
A0A1S3D2B8	A0A1S3D2B8|A0A1S3D2B8_DIACI:A0A1S3D2H6|A0A1S3D2H6_DIACI:A0A3Q0IUM9|A0A3Q0IUM9_DIACI:A0A1S4ECC8|A0A1S4ECC8_DIACI	S	NILADEIVEDPQVGEVDNS(+79.97)KEK	19	22	Trophozoite cysteine proteinase-like isoform X6 OS=Diaphorina citri OX=121845 GN=LOC103509990 PE=3 SV=1	Trophozoite cysteine proteinase-like isoform X6	LOC103509990	43.48	2520.16	-6.3	360	381		S378	VGEVDNSKEKFVI	4665.69	1726.97	2758.61	3050.42	487.2	70.5982	436.739	331.512	9.20154	0.03544
A0A3Q0IRS5	A0A3Q0IRS5|A0A3Q0IRS5_DIACI	S	HDFNQPDPHVIS(+79.97)DQER	12	16	Uncharacterized protein LOC113466118 OS=Diaphorina citri OX=121845 GN=LOC113466118 PE=4 SV=1	Uncharacterized protein LOC113466118	LOC113466118	42.9	2012.84	-1	77	92		S88	PDPHVISDQERLR	4127.29	3808.86	1684.92	3207.02	693.619	70.4502	289.6	351.223	9.13101	0.0222766
A0A3Q0INS1	A0A3Q0INS1|A0A3Q0INS1_DIACI	S	SSFES(+79.97)ADEAPPGKPTFNEVTQR	5	22	Acyl carrier protein, mitochondrial OS=Diaphorina citri OX=121845 GN=LOC103507147 PE=3 SV=1	Acyl carrier protein, mitochondrial	LOC103507147	81.75	2473.08	-3.6	45	66	S5:Phosphorylation (STY):25.70	S49	CKSSFESADEAPP	25021.9	20164.1	18197.6	21127.9	2449.35	1242.23	3814.14	2501.9	8.44472	0.000994101
A0A3Q0JK51	A0A3Q0JK51|A0A3Q0JK51_DIACI	S	DNDYNDDDQKNHQNS(+79.97)GSHNNNNHHNSGSNDNK	15	32	Vitellogenin-A1-like OS=Diaphorina citri OX=121845 GN=LOC103523199 PE=4 SV=1	Vitellogenin-A1-like	LOC103523199	57.17	3728.39	-0.9	1082	1113	S15:Phosphorylation (STY):0.00	S1096	QKNHQNSGSHNNN	7865.95	10183.1	15421.2	11156.8	2551.56		138.85	1345.21	8.29371	0.0476023
A0A3Q0JN66	A0A3Q0JN66|A0A3Q0JN66_DIACI	S	NSES(+79.97)DDASTSLK	4	12	Nucleolar and coiled-body phosphoprotein 1-like OS=Diaphorina citri OX=121845 GN=LOC103522063 PE=4 SV=1	Nucleolar and coiled-body phosphoprotein 1-like	LOC103522063	59.84	1332.51	-0.9	256	267	S4:Phosphorylation (STY):25.66	S259	SEKNSESDDASTS	13294	7565.93	5790.43	8883.47	381.788	320.581	2639.76	1114.04	7.97408	0.0313195
A0A3Q0IRV1	A0A3Q0IRV1|A0A3Q0IRV1_DIACI	S	SS(+79.97)S(+79.97)NLASNESK	2	11	Uncharacterized protein LOC103506515 OS=Diaphorina citri OX=121845 GN=LOC103506515 PE=4 SV=1	Uncharacterized protein LOC103506515	LOC103506515	32.53	1282.45	-2.9	361	371	S2:Phosphorylation (STY):0.00;S3:Phosphorylation (STY):0.00	S362	KRISRSSSNLASN	1674.46	1713.96		1694.21	287.496		150.109	218.803	7.7431	0.00233859
A0A3Q0IRV1	A0A3Q0IRV1|A0A3Q0IRV1_DIACI	S	SS(+79.97)S(+79.97)NLASNESK	3	11	Uncharacterized protein LOC103506515 OS=Diaphorina citri OX=121845 GN=LOC103506515 PE=4 SV=1	Uncharacterized protein LOC103506515	LOC103506515	32.53	1282.45	-2.9	361	371	S2:Phosphorylation (STY):0.00;S3:Phosphorylation (STY):0.00	S363	RISRSSSNLASNE	1674.46	1713.96		1694.21	287.496		150.109	218.803	7.7431	0.00233859
A0A3Q0IZY7	A0A3Q0IZY7|A0A3Q0IZY7_DIACI	S	EEDDDVDLFGSDSEEES(+79.97)EEAAR	17	22	Probable elongation factor 1-delta OS=Diaphorina citri OX=121845 GN=LOC103512639 PE=3 SV=1	Probable elongation factor 1-delta	LOC103512639	46.49	2551.92	-4	314	335	S17:Phosphorylation (STY):0.00	S330	SDSEEESEEAARI	195369	79869.4	101361	125533	462.324	45786.6	3020.46	16423.1	7.64369	0.0467689
A0A3Q0IZP5	A0A3Q0IZP5|A0A3Q0IZP5_DIACI	S	FS(+79.97)YPRPYSEPPS(+79.97)PSSSR	2	17	Glycogen [starch] synthase OS=Diaphorina citri OX=121845 GN=LOC103512410 PE=3 SV=1	Glycogen [starch] synthase	LOC103512410	32.48	2099.84	-7.6	2805	2821	S2:Phosphorylation (STY):0.00;S12:Phosphorylation (STY):2.87	S2806	GYGGRFSYPRPYS	6603.37	8602.63	10695.5	8633.84	1988.87	158.738	1256.53	1134.71	7.60884	0.00442731
A0A3Q0IZP5	A0A3Q0IZP5|A0A3Q0IZP5_DIACI	S	FS(+79.97)YPRPYSEPPS(+79.97)PSSSR	12	17	Glycogen [starch] synthase OS=Diaphorina citri OX=121845 GN=LOC103512410 PE=3 SV=1	Glycogen [starch] synthase	LOC103512410	32.48	2099.84	-7.6	2805	2821	S2:Phosphorylation (STY):0.00;S12:Phosphorylation (STY):2.87	S2816	PYSEPPSPSSSRA	6603.37	8602.63	10695.5	8633.84	1988.87	158.738	1256.53	1134.71	7.60884	0.00442731
A0A1S3DUS6	A0A1S3DUS6|A0A1S3DUS6_DIACI	S	ES(+79.97)EITRPASPLARPPSPK	2	18	Titin-like OS=Diaphorina citri OX=121845 GN=LOC103524724 PE=4 SV=1	Titin-like	LOC103524724	27.95	2012.01	-3.2	316	333	S2:Phosphorylation (STY):0.00	S317	TKLHKESEITRPA	1082.21	1431.44	2433.45	1649.03	428.135	109.657	115.417	217.736	7.57352	0.0267589
A0A3Q0JJK2	A0A3Q0JJK2|A0A3Q0JJK2_DIACI	S	IGVSGGS(+79.97)LIK	7	10	6-phosphogluconolactonase OS=Diaphorina citri OX=121845 GN=LOC103522863 PE=3 SV=1	6-phosphogluconolactonase	LOC103522863	41.08	1009.52	-6.4	18	27	S7:Phosphorylation (STY):19.05	S24	IGVSGGSLIKALA	1669.3	2732.93	2020.9	2141.04	210.309	429.976	225.609	288.631	7.41791	0.00446504
A0A3Q0JF97	A0A3Q0JF97|A0A3Q0JF97_DIACI	S	DKYPIHSNILQAS(+79.97)SDYHLDR	13	20	Bumetanide-sensitive sodium-(Potassium)-chloride cotransporter OS=Diaphorina citri OX=121845 GN=LOC103517981 PE=4 SV=1	Bumetanide-sensitive sodium-(Potassium)-chloride cotransporter	LOC103517981	38.39	2451.12	-2.6	769	788	S13:Phosphorylation (STY):0.00	S781	SNILQASSDYHLD	1317.34	3475.72	4510.76	3101.27	72.7467	714.108	470.048	418.968	7.40218	0.0489721
A0A1S4ERR3	A0A1S4ERR3|A0A1S4ERR3_DIACI	T	HVRT(+79.97)PS(+79.97)PPPPPR	4	12	U2 snRNP-associated SURP motif-containing protein OS=Diaphorina citri OX=121845 GN=LOC103523847 PE=4 SV=1	U2 snRNP-associated SURP motif-containing protein	LOC103523847	50.56	1496.67	-2.5	1023	1034		T1026	DRKHVRTPSPPPP	1797.87	1696.07	3930.44	2474.79	257.46	551.233	229.828	346.174	7.14899	0.0444038
A0A1S4ERR3	A0A1S4ERR3|A0A1S4ERR3_DIACI	S	HVRT(+79.97)PS(+79.97)PPPPPR	6	12	U2 snRNP-associated SURP motif-containing protein OS=Diaphorina citri OX=121845 GN=LOC103523847 PE=4 SV=1	U2 snRNP-associated SURP motif-containing protein	LOC103523847	50.56	1496.67	-2.5	1023	1034		S1028	KHVRTPSPPPPPR	1797.87	1696.07	3930.44	2474.79	257.46	551.233	229.828	346.174	7.14899	0.0444038
A0A1S4EKY9	A0A1S4EKY9|A0A1S4EKY9_DIACI:A0A3Q0JK84|A0A3Q0JK84_DIACI	S	EHS(+79.97)LYDSPSR	3	10	Uncharacterized protein DDB_G0283357-like OS=Diaphorina citri OX=121845 GN=LOC103517151 PE=4 SV=1	Uncharacterized protein DDB_G0283357-like	LOC103517151	31.74	1269.5	-1.7	818	827	S3:Phosphorylation (STY):0.00	S820	NAYREHSLYDSPS	2564.91	1310.48	1982.81	1952.73	485.65	197.311	138.822	273.928	7.12864	0.0113184
A0A3Q0J321	A0A3Q0J321|A0A3Q0J321_DIACI	S	S(+79.97)SSVINPPK	1	9	LOW QUALITY PROTEIN: microtubule-actin cross-linking factor 1, isoforms 1/2/3/5 OS=Diaphorina citri OX=121845 GN=LOC103512109 PE=4 SV=1	LOW QUALITY PROTEIN: microtubule-actin cross-linking factor 1, isoforms 1/2/3/5	LOC103512109	47.95	1007.47	-6.9	5107	5115	S1:Phosphorylation (STY):0.00	S5107	TPGKRRSSSVINP	1609.28	797.8	1383.09	1263.39	87.8441	85.3967	364.837	179.359	7.04391	0.0138492
A0A1S4ESW4	A0A1S4ESW4|A0A1S4ESW4_DIACI	S	VNQLS(+79.97)IPYGNDGIGETLFNEK	5	21	Uncharacterized protein LOC103524922 OS=Diaphorina citri OX=121845 GN=LOC103524922 PE=4 SV=1	Uncharacterized protein LOC103524922	LOC103524922	46.76	2387.1	1.9	207	227	S5:Phosphorylation (STY):4.05	S211	DKVNQLSIPYGND	7013.62	6005.23	5474.93	6164.59	430.399	1608.03	596.742	878.391	7.01805	0.00081613
A0A1S4EIR4	A0A1S4EIR4|A0A1S4EIR4_DIACI	S	IGPLGLS(+79.97)PK	7	9	Large ribosomal subunit protein uL11 OS=Diaphorina citri OX=121845 GN=LOC103515306 PE=3 SV=1	Large ribosomal subunit protein uL11	LOC103515306	49.19	960.505	-2.9	32	40		S38	IGPLGLSPKKVGD	3128.33	1569.92	2364.24	2354.16	582.198	296.907	132.149	337.085	6.98389	0.0126116
A0A3Q0IL42	A0A3Q0IL42|A0A3Q0IL42_DIACI	T	GTATTTSDTLT(+79.97)S(+79.97)PALLPAR	11	19	Ankyrin-3-like OS=Diaphorina citri OX=121845 GN=LOC103505993 PE=4 SV=1	Ankyrin-3-like	LOC103505993	34.53	2032.91	5.6	2567	2585	T11:Phosphorylation (STY):0.00;S12:Phosphorylation (STY):0.00	T2577	TTSDTLTSPALLP	5795.64	3369.02	2438.02	3867.56	1062.16	391.914	238.604	564.227	6.85462	0.032897
A0A3Q0IL42	A0A3Q0IL42|A0A3Q0IL42_DIACI	S	GTATTTSDTLT(+79.97)S(+79.97)PALLPAR	12	19	Ankyrin-3-like OS=Diaphorina citri OX=121845 GN=LOC103505993 PE=4 SV=1	Ankyrin-3-like	LOC103505993	34.53	2032.91	5.6	2567	2585	T11:Phosphorylation (STY):0.00;S12:Phosphorylation (STY):0.00	S2578	TSDTLTSPALLPA	5795.64	3369.02	2438.02	3867.56	1062.16	391.914	238.604	564.227	6.85462	0.032897
A0A1S4E7C4	A0A1S4E7C4|A0A1S4E7C4_DIACI	S	S(+79.97)IEAIAK	1	7	Uncharacterized protein LOC103505876 OS=Diaphorina citri OX=121845 GN=LOC103505876 PE=4 SV=1	Uncharacterized protein LOC103505876	LOC103505876	31.12	810.389	-6.2	140	146		S140	GFGHEKSIEAIAK	5391.16	7173.7	7012.36	6525.74	1341		565.473	953.236	6.84588	0.00584865
A0A1S4EDD2	A0A1S4EDD2|A0A1S4EDD2_DIACI	S	VHEIGYS(+79.97)R	7	8	Uncharacterized protein LOC103510523 OS=Diaphorina citri OX=121845 GN=LOC103510523 PE=4 SV=2	Uncharacterized protein LOC103510523	LOC103510523	55.24	1039.45	-2.7	668	675	S7:Phosphorylation (STY):11.06	S674	VHEIGYSRETVHA	1077.97	1720.11	557.029	1118.37	136.517	230.467	128.136	165.04	6.77635	0.0477853
A0A1S4EJC4	A0A1S4EJC4|A0A1S4EJC4_DIACI	S	ERDSQISS(+79.97)LEK	8	11	Neurofilament heavy polypeptide-like OS=Diaphorina citri OX=121845 GN=LOC108253219 PE=4 SV=1	Neurofilament heavy polypeptide-like	LOC108253219	37.32	1370.61	-14.4	271	281	S8:Phosphorylation (STY):0.00	S278	RDSQISSLEKTTV	21401.5	7434.9	15451.7	14762.7	1662.61	2886.29	2028.87	2192.59	6.733	0.036432
A0A1S4EJU2	A0A1S4EJU2|A0A1S4EJU2_DIACI:A0A3Q0IV54|A0A3Q0IV54_DIACI	S	GKS(+79.97)EIVYK	3	8	ADP/ATP translocase OS=Diaphorina citri OX=121845 GN=LOC103516169 PE=3 SV=1	ADP/ATP translocase	LOC103516169	51.05	1002.48	-2.1	245	252	S3:Phosphorylation (STY):63.97	S247	QSGRGKSEIVYKG	26093.3	21180.5	16830.6	21368.1	3943.98	499.295	5102.36	3181.88	6.71556	0.0037918
A0A3Q0J321	A0A3Q0J321|A0A3Q0J321_DIACI	S	SSS(+79.97)VINPPK	3	9	LOW QUALITY PROTEIN: microtubule-actin cross-linking factor 1, isoforms 1/2/3/5 OS=Diaphorina citri OX=121845 GN=LOC103512109 PE=4 SV=1	LOW QUALITY PROTEIN: microtubule-actin cross-linking factor 1, isoforms 1/2/3/5	LOC103512109	59.41	1007.47	-5.2	5107	5115	S3:Phosphorylation (STY):17.01	S5109	GKRRSSSVINPPK	4228	4360.55	4442.61	4343.72	189.068	165.831	1588.16	647.687	6.70651	0.00146424
A0A1S3DK96	A0A1S3DK96|A0A1S3DK96_DIACI	S	VELPHLTS(+79.97)VDR	8	11	Uncharacterized protein LOC103519425 OS=Diaphorina citri OX=121845 GN=LOC103519425 PE=4 SV=1	Uncharacterized protein LOC103519425	LOC103519425	39.86	1344.64	-1.9	8	18	S8:Phosphorylation (STY):11.06	S15	ELPHLTSVDRIFK	5796.12	5958.28	6322.34	6025.58	1316.73	1264.59	125.63	902.318	6.67789	0.00025596
A0A3Q0IPJ2	A0A3Q0IPJ2|A0A3Q0IPJ2_DIACI	T	RLT(+79.97)LSWKPSIPYGAR	3	15	LOW QUALITY PROTEIN: obscurin-like OS=Diaphorina citri OX=121845 GN=LOC103507575 PE=3 SV=1	LOW QUALITY PROTEIN: obscurin-like	LOC103507575	31.43	1823.94	-4.7	4555	4569	T3:Phosphorylation (STY):11.10	T4557	MTDRRLTLSWKPS		825.474	466.997	646.235	100.066	69.9153	121.005	96.9954	6.66254	0.0267691
A0A3Q0J5H7	A0A3Q0J5H7|A0A3Q0J5H7_DIACI	S	SSPVPHAEVLPS(+79.97)PHQVPHDTR	12	21	PDZ and LIM domain protein Zasp-like OS=Diaphorina citri OX=121845 GN=LOC103515161 PE=4 SV=1	PDZ and LIM domain protein Zasp-like	LOC103515161	55.15	2366.12	-4.1	289	309	S12:Phosphorylation (STY):28.74	S300	HAEVLPSPHQVPH	16951.1	9875.7	20921.2	15916	616.597	3757.97	2840.63	2405.06	6.6177	0.0158848
A0A1S3DER6	A0A1S3DER6|A0A1S3DER6_DIACI:A0A1S3DG33|A0A1S3DG33_DIACI	S	GEFS(+79.97)QTR	4	7	Neither inactivation nor afterpotential protein C-like OS=Diaphorina citri OX=121845 GN=LOC103517041 PE=3 SV=1	Neither inactivation nor afterpotential protein C-like	LOC103517041	29.2	903.349	-0.8	165	171	S4:Phosphorylation (STY):26.31	S168	ESRGEFSQTRRMR	20992	25630.5	22891.7	23171.4	299.993		6703.07	3501.53	6.6175	0.00689202
A0A3Q0JE09	A0A3Q0JE09|A0A3Q0JE09_DIACI	T	FLPVFVDPST(+79.97)TGKSPAK	10	17	Cell division cycle and apoptosis regulator protein 1 OS=Diaphorina citri OX=121845 GN=LOC103519413 PE=4 SV=1	Cell division cycle and apoptosis regulator protein 1	LOC103519413	41.32	1869.93	0.9	1010	1026	T10:Phosphorylation (STY):0.00	T1019	VFVDPSTTGKSPA	8757.44	3435.1	4949.32	5713.96	1823.27	610.57	160.266	864.703	6.608	0.0431395
A0A3Q0ISH1	A0A3Q0ISH1|A0A3Q0ISH1_DIACI	T	TAGTTFMMT(+79.97)PY(+79.97)VVTR	9	15	Stress-activated protein kinase JNK OS=Diaphorina citri OX=121845 GN=LOC103508970 PE=3 SV=1	Stress-activated protein kinase JNK	LOC103508970	25.72	1834.74	4.7	223	237	T9:Phosphorylation (STY):25.58;Y11:Phosphorylation (STY):19.05	T231	GTTFMMTPYVVTR	656.531	916.875	888.966	820.791	169.058	100.816	106.115	125.329	6.54907	0.00123639
A0A3Q0ISH1	A0A3Q0ISH1|A0A3Q0ISH1_DIACI	Y	TAGTTFMMT(+79.97)PY(+79.97)VVTR	11	15	Stress-activated protein kinase JNK OS=Diaphorina citri OX=121845 GN=LOC103508970 PE=3 SV=1	Stress-activated protein kinase JNK	LOC103508970	25.72	1834.74	4.7	223	237	T9:Phosphorylation (STY):25.58;Y11:Phosphorylation (STY):19.05	Y233	TFMMTPYVVTRYY	656.531	916.875	888.966	820.791	169.058	100.816	106.115	125.329	6.54907	0.00123639
A0A3Q0J1X6	A0A3Q0J1X6|A0A3Q0J1X6_DIACI:A0A1S3DDE2|A0A1S3DDE2_DIACI	S	S(+79.97)LGS(+79.97)VHDTTK	1	10	Uncharacterized protein LOC103511023 OS=Diaphorina citri OX=121845 GN=LOC103511023 PE=4 SV=1	Uncharacterized protein LOC103511023	LOC103511023	42.53	1203.46	0.6	529	538	S1:Phosphorylation (STY):21.57;S4:Phosphorylation (STY):46.31	S529	TLTRSRSLGSVHD	2361.3	745.148	1908.88	1671.78	401.456	142.423	231.309	258.396	6.46982	0.0441071
A0A3Q0J1X6	A0A3Q0J1X6|A0A3Q0J1X6_DIACI:A0A1S3DDE2|A0A1S3DDE2_DIACI	S	S(+79.97)LGS(+79.97)VHDTTK	4	10	Uncharacterized protein LOC103511023 OS=Diaphorina citri OX=121845 GN=LOC103511023 PE=4 SV=1	Uncharacterized protein LOC103511023	LOC103511023	42.53	1203.46	0.6	529	538	S1:Phosphorylation (STY):21.57;S4:Phosphorylation (STY):46.31	S532	RSRSLGSVHDTTK	2361.3	745.148	1908.88	1671.78	401.456	142.423	231.309	258.396	6.46982	0.0441071
A0A3Q0IJL7	A0A3Q0IJL7|A0A3Q0IJL7_DIACI	Y	NSY(+79.97)TIDNEDVQQY(+79.97)ERSDSTDSFNVS(+79.97)K	3	26	Dentin sialophosphoprotein-like OS=Diaphorina citri OX=121845 GN=LOC103505284 PE=4 SV=1	Dentin sialophosphoprotein-like	LOC103505284	32.63	3280.22	12.4	602	627	Y3:Phosphorylation (STY):0.00;Y13:Phosphorylation (STY):0.00;S25:Phosphorylation (STY):0.00	Y604	NDSRNSYTIDNED		790.511	1092.59	941.551	247.381	90.1144	106.317	147.937	6.36452	0.00878056
A0A3Q0IJL7	A0A3Q0IJL7|A0A3Q0IJL7_DIACI	Y	NSY(+79.97)TIDNEDVQQY(+79.97)ERSDSTDSFNVS(+79.97)K	13	26	Dentin sialophosphoprotein-like OS=Diaphorina citri OX=121845 GN=LOC103505284 PE=4 SV=1	Dentin sialophosphoprotein-like	LOC103505284	32.63	3280.22	12.4	602	627	Y3:Phosphorylation (STY):0.00;Y13:Phosphorylation (STY):0.00;S25:Phosphorylation (STY):0.00	Y614	NEDVQQYERSDST		790.511	1092.59	941.551	247.381	90.1144	106.317	147.937	6.36452	0.00878056
A0A3Q0IJL7	A0A3Q0IJL7|A0A3Q0IJL7_DIACI	S	NSY(+79.97)TIDNEDVQQY(+79.97)ERSDSTDSFNVS(+79.97)K	25	26	Dentin sialophosphoprotein-like OS=Diaphorina citri OX=121845 GN=LOC103505284 PE=4 SV=1	Dentin sialophosphoprotein-like	LOC103505284	32.63	3280.22	12.4	602	627	Y3:Phosphorylation (STY):0.00;Y13:Phosphorylation (STY):0.00;S25:Phosphorylation (STY):0.00	S626	TDSFNVSKLRKDS		790.511	1092.59	941.551	247.381	90.1144	106.317	147.937	6.36452	0.00878056
A0A3Q0IX53	A0A3Q0IX53|A0A3Q0IX53_DIACI	T	IT(+79.97)PPTIPDR	2	9	Ryanodine receptor-like OS=Diaphorina citri OX=121845 GN=LOC103511156 PE=4 SV=1	Ryanodine receptor-like	LOC103511156	47.17	1088.53	2.8	37	45	T2:Phosphorylation (STY):38.16	T38	TTDLKITPPTIPD	8717.14	5394.4	5705.85	6605.79	242.166	282.744	2597.87	1040.93	6.34607	0.0133433
A0A3Q0IZ37	A0A3Q0IZ37|A0A3Q0IZ37_DIACI	T	EAVVT(+79.97)PTDET(+79.97)NSETAEK	5	17	Proteoglycan 4 OS=Diaphorina citri OX=121845 GN=LOC103512155 PE=4 SV=1	Proteoglycan 4	LOC103512155	45.69	1979.77	2.5	546	562	T5:Phosphorylation (STY):26.31;T10:Phosphorylation (STY):9.40	T550	EKEAVVTPTDETN	153897	98055.9	76467.2	109473	134.989	23236.9	28858.1	17410	6.28795	0.0203103
A0A3Q0IZ37	A0A3Q0IZ37|A0A3Q0IZ37_DIACI	T	EAVVT(+79.97)PTDET(+79.97)NSETAEK	10	17	Proteoglycan 4 OS=Diaphorina citri OX=121845 GN=LOC103512155 PE=4 SV=1	Proteoglycan 4	LOC103512155	45.69	1979.77	2.5	546	562	T5:Phosphorylation (STY):26.31;T10:Phosphorylation (STY):9.40	T555	VTPTDETNSETAE	153897	98055.9	76467.2	109473	134.989	23236.9	28858.1	17410	6.28795	0.0203103
A0A3Q0IKQ3	A0A3Q0IKQ3|A0A3Q0IKQ3_DIACI	S	TEEDLDNNAHES(+79.97)DEGS(+79.97)IKS(+79.97)ER	12	21	Protein CASC3 OS=Diaphorina citri OX=121845 GN=LOC103505670 PE=3 SV=1	Protein CASC3	LOC103505670	42.25	2613.91	2.3	308	328	S12:Phosphorylation (STY):8.53;S16:Phosphorylation (STY):12.21;S19:Phosphorylation (STY):23.75	S319	DNNAHESDEGSIK	2900.47	2290.84	2757.42	2649.58	548.907		316.949	432.928	6.12012	0.0031263
A0A3Q0IKQ3	A0A3Q0IKQ3|A0A3Q0IKQ3_DIACI	S	TEEDLDNNAHES(+79.97)DEGS(+79.97)IKS(+79.97)ER	16	21	Protein CASC3 OS=Diaphorina citri OX=121845 GN=LOC103505670 PE=3 SV=1	Protein CASC3	LOC103505670	42.25	2613.91	2.3	308	328	S12:Phosphorylation (STY):8.53;S16:Phosphorylation (STY):12.21;S19:Phosphorylation (STY):23.75	S323	HESDEGSIKSERE	2900.47	2290.84	2757.42	2649.58	548.907		316.949	432.928	6.12012	0.0031263
A0A3Q0IKQ3	A0A3Q0IKQ3|A0A3Q0IKQ3_DIACI	S	TEEDLDNNAHES(+79.97)DEGS(+79.97)IKS(+79.97)ER	19	21	Protein CASC3 OS=Diaphorina citri OX=121845 GN=LOC103505670 PE=3 SV=1	Protein CASC3	LOC103505670	42.25	2613.91	2.3	308	328	S12:Phosphorylation (STY):8.53;S16:Phosphorylation (STY):12.21;S19:Phosphorylation (STY):23.75	S326	DEGSIKSERECGD	2900.47	2290.84	2757.42	2649.58	548.907		316.949	432.928	6.12012	0.0031263
A0A3Q0J0B8	A0A3Q0J0B8|A0A3Q0J0B8_DIACI	T	ST(+79.97)PAANLGK	2	9	Twitchin-like OS=Diaphorina citri OX=121845 GN=LOC103512724 PE=3 SV=1	Twitchin-like	LOC103512724	56.4	937.427	-2.8	1414	1422	T2:Phosphorylation (STY):0.00	T1415	KLTVRSTPAANLG	10016.9	7811.25	6798.75	8208.98	2657.26	400.615	1029.94	1362.61	6.02446	0.0041744
A0A3Q0J4M6	A0A3Q0J4M6|A0A3Q0J4M6_DIACI	S	DSS(+79.97)SPEINYEATSSSSPPPR	3	20	choline-phosphate cytidylyltransferase OS=Diaphorina citri OX=121845 GN=LOC103514747 PE=3 SV=1	choline-phosphate cytidylyltransferase	LOC103514747	67.45	2186.9	6.9	234	253	S3:Phosphorylation (STY):0.00	S236	SRGRDSSSPEINY	5293.1	5984.55	4034.21	5103.95	1223.6	868.962	450.511	847.689	6.02102	0.00226077
A0A3Q0IVK3	A0A3Q0IVK3|A0A3Q0IVK3_DIACI	S	STS(+79.97)VSSIYR	3	9	Phospholipid-transporting ATPase OS=Diaphorina citri OX=121845 GN=LOC103510070 PE=3 SV=1	Phospholipid-transporting ATPase	LOC103510070	47.17	1078.47	0.7	1375	1383	S3:Phosphorylation (STY):14.04	S1377	SWSRSTSVSSIYR	1991.24	1353.82	1558.87	1634.64	513.231	106.606	198.992	272.943	5.98895	0.00373644
A0A3Q0J9I2	A0A3Q0J9I2|A0A3Q0J9I2_DIACI	S	NSIQDPYEKLDS(+79.97)ETEELAEESAR	12	23	poly(ADP-ribose) glycohydrolase OS=Diaphorina citri OX=121845 GN=LOC103517052 PE=3 SV=1	poly(ADP-ribose) glycohydrolase	LOC103517052	43	2732.17	-1.6	472	494	S12:Phosphorylation (STY):0.00	S483	PYEKLDSETEELA	6818.55	4229.98	9652.62	6900.38	1517.7	1838.63	140.66	1165.66	5.91971	0.0254662
A0A3Q0IX48	A0A3Q0IX48|A0A3Q0IX48_DIACI	S	S(+79.97)C(+57.02)ENLPEESK	1	10	LOW QUALITY PROTEIN: Golgi-specific brefeldin A-resistance guanine nucleotide exchange factor 1-like OS=Diaphorina citri OX=121845 GN=LOC103511171 PE=4 SV=1	LOW QUALITY PROTEIN: Golgi-specific brefeldin A-resistance guanine nucleotide exchange factor 1-like	LOC103511171	46.23	1271.47	-1.2	21	30	S1:Phosphorylation (STY):63.64;C2:Carbamidomethylation:1000.00	S21	NGDIQRSCENLPE	1619	1313.62	1288.43	1407.02	292.887	260.337	163.252	238.825	5.89141	0.000496667
A0A0A7DNF9	A0A0A7DNF9|A0A0A7DNF9_DIACI	S	DQS(+79.97)VEIDK	3	8	Ferritin OS=Diaphorina citri OX=121845 GN=LOC103514874 PE=2 SV=1	Ferritin	LOC103514874	46.91	1012.41	0.8	41	48		S43	CSKKDQSVEIDKL	2390.28	1213.39	1826.76	1810.14	533.725		86.862	310.294	5.83364	0.0494797
A0A1S3D095	A0A1S3D095|A0A1S3D095_DIACI	S	STLELTNHSS(+79.97)	10	10	Facilitated trehalose transporter Tret1-like OS=Diaphorina citri OX=121845 GN=LOC103508605 PE=3 SV=1	Facilitated trehalose transporter Tret1-like	LOC103508605	51.15	1167.48	2.9	500	509	S10:Phosphorylation (STY):0.00	S509	ELTNHSS______	1830.97	1908.71	1533.91	1757.86	91.7048	545.985	268.405	302.032	5.82012	0.00113336
A0A3Q0IZP5	A0A3Q0IZP5|A0A3Q0IZP5_DIACI	S	ATTPVPS(+79.97)QR	7	9	Glycogen [starch] synthase OS=Diaphorina citri OX=121845 GN=LOC103512410 PE=3 SV=1	Glycogen [starch] synthase	LOC103512410	35.24	1035.47	-2.8	2822	2830	S7:Phosphorylation (STY):25.70	S2828	ATTPVPSQRNSDD	8508.55	4196.29	3564.7	5423.18	1282.36	335.525	1286.78	968.22	5.60118	0.0483094
A0A3Q0J6A5	A0A3Q0J6A5|A0A3Q0J6A5_DIACI	T	NDAGAEST(+79.97)HSGGAGASTGGVGGEAADVLK	8	29	LOW QUALITY PROTEIN: dmX-like protein 1 OS=Diaphorina citri OX=121845 GN=LOC103513612 PE=4 SV=1	LOW QUALITY PROTEIN: dmX-like protein 1	LOC103513612	53.97	2622.12	3.7	300	328	T8:Phosphorylation (STY):0.00	T307	DAGAESTHSGGAG	3739.03	3062.13	2289.73	3030.3	1121.17	60.3336	449.455	543.654	5.57394	0.00881339
A0A3Q0JBG2	A0A3Q0JBG2|A0A3Q0JBG2_DIACI:A0A3Q0JGF9|A0A3Q0JGF9_DIACI	S	DS(+79.97)GDYEIITGYR	2	12	Glutamate dehydrogenase, mitochondrial-like OS=Diaphorina citri OX=121845 GN=LOC113471090 PE=3 SV=1	Glutamate dehydrogenase, mitochondrial-like	LOC113471090	63.22	1467.59	5.4	107	118	S2:Phosphorylation (STY):53.53	S108	FPVRRDSGDYEII	3361	1390.43	2091.26	2280.9	434.43	261.186	544.755	413.457	5.51665	0.0327295
A0A1S3D726	A0A1S3D726|A0A1S3D726_DIACI	S	A(+42.01)ETDSSATNGNS(+79.97)GAEAEVSK	12	20	La protein homolog isoform X1 OS=Diaphorina citri OX=121845 GN=LOC103511897 PE=4 SV=1	La protein homolog isoform X1	LOC103511897	59.74	2045.81	1.4	2	21	A1:Acetylation (Protein N-term):1000.00;S12:Phosphorylation (STY):33.81	S13	SATNGNSGAEAEV	3407.45	2412.79	3163.8	2994.68	148.97	1211.96	307.801	556.243	5.38376	0.00545732
A0A3Q0J7T7	A0A3Q0J7T7|A0A3Q0J7T7_DIACI:A0A3Q0JM80|A0A3Q0JM80_DIACI	S	FDSVVPSFNS(+79.97)PR	10	12	Serine/threonine-protein kinase polo-like OS=Diaphorina citri OX=121845 GN=LOC113465355 PE=4 SV=1	Serine/threonine-protein kinase polo-like	LOC113465355	50.29	1430.62	1	59	70	S10:Phosphorylation (STY):0.00	S68	VVPSFNSPRRKPL	4823.22	1723.13	3759.38	3435.24	466.212	924.719	527.265	639.399	5.37262	0.0385365
A0A1S4EDD2	A0A1S4EDD2|A0A1S4EDD2_DIACI	T	T(+79.97)TPGATKGGQR	1	11	Uncharacterized protein LOC103510523 OS=Diaphorina citri OX=121845 GN=LOC103510523 PE=4 SV=2	Uncharacterized protein LOC103510523	LOC103510523	27.11	1152.53	-1.2	1130	1140	T1:Phosphorylation (STY):0.00	T1130	KTKPPKTTPGATK	7192.04	4782.58	4213.17	5395.93	1426.29	1276.81	313.098	1005.4	5.36696	0.0108866
A0A3Q0J2Z0	A0A3Q0J2Z0|A0A3Q0J2Z0_DIACI	S	MLAAISGSYVIPAM(+15.99)YSLS(+79.97)PNPHS(+79.97)TPFQDK	18	29	Thioredoxin reductase 1, mitochondrial-like OS=Diaphorina citri OX=121845 GN=LOC108252951 PE=3 SV=1	Thioredoxin reductase 1, mitochondrial-like	LOC108252951	24.81	3297.45	5.3	1	29	M14:Oxidation (M):15.57;S18:Phosphorylation (STY):0.00;S23:Phosphorylation (STY):0.00	S18	PAMYSLSPNPHST		831.916	574.663	703.29	77.7505	159.982	162.419	133.384	5.27267	0.0114403
A0A3Q0J2Z0	A0A3Q0J2Z0|A0A3Q0J2Z0_DIACI	S	MLAAISGSYVIPAM(+15.99)YSLS(+79.97)PNPHS(+79.97)TPFQDK	23	29	Thioredoxin reductase 1, mitochondrial-like OS=Diaphorina citri OX=121845 GN=LOC108252951 PE=3 SV=1	Thioredoxin reductase 1, mitochondrial-like	LOC108252951	24.81	3297.45	5.3	1	29	M14:Oxidation (M):15.57;S18:Phosphorylation (STY):0.00;S23:Phosphorylation (STY):0.00	S23	LSPNPHSTPFQDK		831.916	574.663	703.29	77.7505	159.982	162.419	133.384	5.27267	0.0114403
A0A3Q0IN65	A0A3Q0IN65|A0A3Q0IN65_DIACI:A0A3Q0ISR9|A0A3Q0ISR9_DIACI	S	KDS(+79.97)APDGLITETDR	3	14	Septin-5 isoform X1 OS=Diaphorina citri OX=121845 GN=LOC103506889 PE=4 SV=1	Septin-5 isoform X1	LOC103506889	40.05	1596.7	1.1	241	254	S3:Phosphorylation (STY):76.05	S243	RKLKKDSAPDGLI	9185.22	5194.23	5485.85	6621.77	1102.31	1540.31	1136.12	1259.58	5.25714	0.0142631
A0A3Q0J8A7	A0A3Q0J8A7|A0A3Q0J8A7_DIACI	S	DDS(+79.97)STAVPEIK	3	11	LOW QUALITY PROTEIN: hemicentin-2-like OS=Diaphorina citri OX=121845 GN=LOC103516489 PE=4 SV=1	LOW QUALITY PROTEIN: hemicentin-2-like	LOC103516489	58.14	1240.52	-4.5	1720	1730	S3:Phosphorylation (STY):14.02	S1722	EEPRDDSSTAVPE	8559.77	5154.07	7476.9	7063.58	3035.92	266.956	739.251	1347.38	5.24247	0.0123243
A0A3Q0J5H7	A0A3Q0J5H7|A0A3Q0J5H7_DIACI	S	S(+79.97)SPVPHAEVLPS(+79.97)PHQVPHDTR	1	21	PDZ and LIM domain protein Zasp-like OS=Diaphorina citri OX=121845 GN=LOC103515161 PE=4 SV=1	PDZ and LIM domain protein Zasp-like	LOC103515161	34.41	2446.08	-7.2	289	309	S1:Phosphorylation (STY):0.00;S12:Phosphorylation (STY):13.58	S289	RPYYTRSSPVPHA	7072.54	2562.38	4348.28	4661.07	953.647	987.842	728.607	890.032	5.23696	0.0454587
A0A3Q0J5H7	A0A3Q0J5H7|A0A3Q0J5H7_DIACI	S	S(+79.97)SPVPHAEVLPS(+79.97)PHQVPHDTR	12	21	PDZ and LIM domain protein Zasp-like OS=Diaphorina citri OX=121845 GN=LOC103515161 PE=4 SV=1	PDZ and LIM domain protein Zasp-like	LOC103515161	34.41	2446.08	-7.2	289	309	S1:Phosphorylation (STY):0.00;S12:Phosphorylation (STY):13.58	S300	HAEVLPSPHQVPH	7072.54	2562.38	4348.28	4661.07	953.647	987.842	728.607	890.032	5.23696	0.0454587
A0A3Q0IX68	A0A3Q0IX68|A0A3Q0IX68_DIACI	S	VSGTGS(+79.97)VSF	6	9	Uncharacterized protein LOC113468256 OS=Diaphorina citri OX=121845 GN=LOC113468256 PE=4 SV=1	Uncharacterized protein LOC113468256	LOC113468256	25.54	919.369	7.4	103	111	S6:Phosphorylation (STY):0.00	S108	KVSGTGSVSF___	2007.4	3123.38	3732.78	2954.52	885.59		246.038	565.814	5.22172	0.0412331
A0A1S3DCE5	A0A1S3DCE5|A0A1S3DCE5_DIACI	T	ST(+79.97)TTGHLIYK	2	10	Elongation factor 1-alpha OS=Diaphorina citri OX=121845 GN=LOC103514985 PE=3 SV=1	Elongation factor 1-alpha	LOC103514985	47.68	1199.56	4	21	30	T2:Phosphorylation (STY):0.00	T22	VDSGKSTTTGHLI	767.506	832.123	827.407	809.012	100.268	136.026	228.516	154.937	5.22157	0.000114039
A0A1S3DNM5	A0A1S3DNM5|A0A1S3DNM5_DIACI:A0A3Q0J1F3|A0A3Q0J1F3_DIACI	S	SS(+79.97)PPLLR	2	7	Kinesin-like protein unc-104 OS=Diaphorina citri OX=121845 GN=LOC103522067 PE=4 SV=2	Kinesin-like protein unc-104	LOC103522067	51.98	848.416	-0.7	37	43	S2:Phosphorylation (STY):0.00	S38	LVDGRSSPPLLRI	2253.98	2690.08	2783.33	2575.8	749.005		237.811	493.408	5.22043	0.00524057
A0A3Q0IXQ1	A0A3Q0IXQ1|A0A3Q0IXQ1_DIACI	S	VAS(+79.97)IVHR	3	7	calcium/calmodulin-dependent protein kinase OS=Diaphorina citri OX=121845 GN=LOC103509280 PE=3 SV=1	calcium/calmodulin-dependent protein kinase	LOC103509280	52.39	860.427	-1.4	255	261		S257	QRERVASIVHRQE	2873.55	4980.07	4588.6	4147.41	982.034	684.447	727.873	798.118	5.19648	0.0068615
A0A3Q0JNY5	A0A3Q0JNY5|A0A3Q0JNY5_DIACI	S	TGNFIQPTVDLSPS(+79.97)AR	14	16	Nuclear pore complex protein Nup98-Nup96 OS=Diaphorina citri OX=121845 GN=LOC103523825 PE=3 SV=1	Nuclear pore complex protein Nup98-Nup96	LOC103523825	46.48	1781.84	4.9	1009	1024	S14:Phosphorylation (STY):5.99	S1022	TVDLSPSARTLSP	411.389	430.516	381.003	407.636	50.1536	106.958	78.6643	78.5918	5.18675	0.000112982
A0A3Q0IZI2	A0A3Q0IZI2|A0A3Q0IZI2_DIACI	S	S(+79.97)SENSVIELR	1	10	Peroxidase-like OS=Diaphorina citri OX=121845 GN=LOC113468741 PE=4 SV=1	Peroxidase-like	LOC113468741	70.18	1212.54	-5.4	70	79	S1:Phosphorylation (STY):11.06	S70	LVGEDRSSENSVI	19458.8	13036.4	8298.83	13598	4098.02	1511.51	2324.97	2644.83	5.14135	0.0300342
A0A3Q0J788	A0A3Q0J788|A0A3Q0J788_DIACI	T	QPWDNPNNDAPT(+79.97)PR	12	14	Inorganic phosphate cotransporter OS=Diaphorina citri OX=121845 GN=LOC103513629 PE=4 SV=1	Inorganic phosphate cotransporter	LOC103513629	48.26	1700.69	-0.8	465	478		T476	PNNDAPTPRAATK	2811.63	2027.87	2414.32	2417.94	489.322	241.995	684.976	472.098	5.12169	0.0017055
A0A3Q0J7S0	A0A3Q0J7S0|A0A3Q0J7S0_DIACI:A0A1S3DD98|A0A1S3DD98_DIACI	T	MEAGLT(+79.97)ASQQNLADGSSIAAR	6	21	Spectrin alpha chain OS=Diaphorina citri OX=121845 GN=LOC103516243 PE=4 SV=1	Spectrin alpha chain	LOC103516243	52.94	2169.97	2.7	96	116	T6:Phosphorylation (STY):0.00	T101	KMEAGLTASQQNL	3608.37	6458.79	5870.04	5312.4	2443.27	240.737	438.153	1040.72	5.10454	0.0187633
A0A3Q0J428	A0A3Q0J428|A0A3Q0J428_DIACI	S	S(+79.97)AAVVEDIQR	1	10	Diacylglycerol O-acyltransferase 1-like OS=Diaphorina citri OX=121845 GN=LOC103512083 PE=4 SV=1	Diacylglycerol O-acyltransferase 1-like	LOC103512083	64.01	1166.53	-1.3	14	23		S14	KLRRAKSAAVVED	73771.2	54754.4	37701.1	55408.9	11167	10472.6	11446.8	11028.8	5.02402	0.01307
A0A3Q0IRV1	A0A3Q0IRV1|A0A3Q0IRV1_DIACI	S	SS(+79.97)S(+79.97)NLAINESK	2	11	Uncharacterized protein LOC103506515 OS=Diaphorina citri OX=121845 GN=LOC103506515 PE=4 SV=1	Uncharacterized protein LOC103506515	LOC103506515	59.16	1308.5	-0.8	526	536	S2:Phosphorylation (STY):0.00;S3:Phosphorylation (STY):9.40	S527	KRFSRSSSNLAIN	23162.8	13014	14155.8	16777.5	531.051	1097.16	8434.85	3354.35	5.00172	0.0305935
A0A3Q0IRV1	A0A3Q0IRV1|A0A3Q0IRV1_DIACI	S	SS(+79.97)S(+79.97)NLAINESK	3	11	Uncharacterized protein LOC103506515 OS=Diaphorina citri OX=121845 GN=LOC103506515 PE=4 SV=1	Uncharacterized protein LOC103506515	LOC103506515	59.16	1308.5	-0.8	526	536	S2:Phosphorylation (STY):0.00;S3:Phosphorylation (STY):9.40	S528	RFSRSSSNLAINE	23162.8	13014	14155.8	16777.5	531.051	1097.16	8434.85	3354.35	5.00172	0.0305935
A0A3Q0J3F5	A0A3Q0J3F5|A0A3Q0J3F5_DIACI:A0A3Q0J8A6|A0A3Q0J8A6_DIACI:A0A3Q0J7M0|A0A3Q0J7M0_DIACI:A0A3Q0J3A5|A0A3Q0J3A5_DIACI	S	IS(+79.97)DDEEEKEEEVEEEEEEEEEEEEEEEEEE	2	30	Troponin T isoform X5 OS=Diaphorina citri OX=121845 GN=LOC103514096 PE=3 SV=1	Troponin T isoform X5	LOC103514096	125.66	3852.33	5.1	350	379		S351	PIYLKISDDEEEK	19140.3	16603.9	33160.1	22968.1	11664.5	974.719	1143.88	4594.36	4.9992	0.0423054
A0A1S3D9I6	A0A1S3D9I6|A0A1S3D9I6_DIACI	S	EFS(+79.97)MEDAEK	3	9	Skin secretory protein xP2-like isoform X1 OS=Diaphorina citri OX=121845 GN=LOC103514141 PE=4 SV=1	Skin secretory protein xP2-like isoform X1	LOC103514141	57.28	1164.4	-2.4	193	201		S195	VKKREFSMEDAEK	32914.8	36283.6	21308.2	30168.9	11039.7	295.262	6842.4	6059.13	4.97908	0.0119069
A0A1S4ERP3	A0A1S4ERP3|A0A1S4ERP3_DIACI:A0A3Q0J5B5|A0A3Q0J5B5_DIACI	S	S(+79.97)SPMTEIAQK	1	10	Uncharacterized protein LOC108254385 OS=Diaphorina citri OX=121845 GN=LOC108254385 PE=4 SV=2	Uncharacterized protein LOC108254385	LOC108254385	28.78	1170.5	-3.9	83	92	S1:Phosphorylation (STY):0.00	S83	QQLQCRSSPMTEI	1120.08	930.83	1295.53	1115.48	453.21	110.732	114.763	226.235	4.93062	0.00455367
Q0PXZ6	Q0PXZ6|Q0PXZ6_DIACI	T	S(+42.01)DT(+79.97)EDNVPS(+79.97)ANDEGVSDINK	3	20	40S ribosomal protein S12 OS=Diaphorina citri OX=121845 GN=LOC103511878 PE=2 SV=1	40S ribosomal protein S12	LOC103511878	59.57	2306.85	1	2	21	S1:Acetylation (Protein N-term):1000.00;T3:Phosphorylation (STY):78.91;S9:Phosphorylation (STY):38.97	T4	___MSDTEDNVPS	5976.1	5391.46	9289.1	6885.56	59.2604	1644.45	2489.54	1397.75	4.92617	0.0175434
Q0PXZ6	Q0PXZ6|Q0PXZ6_DIACI	S	S(+42.01)DT(+79.97)EDNVPS(+79.97)ANDEGVSDINK	9	20	40S ribosomal protein S12 OS=Diaphorina citri OX=121845 GN=LOC103511878 PE=2 SV=1	40S ribosomal protein S12	LOC103511878	59.57	2306.85	1	2	21	S1:Acetylation (Protein N-term):1000.00;T3:Phosphorylation (STY):78.91;S9:Phosphorylation (STY):38.97	S10	TEDNVPSANDEGV	5976.1	5391.46	9289.1	6885.56	59.2604	1644.45	2489.54	1397.75	4.92617	0.0175434
A0A1S3DK22	A0A1S3DK22|A0A1S3DK22_DIACI	S	AVPDAPGHVDHNNPHS(+79.97)FEINDLHK	16	24	Nucleobindin-2 OS=Diaphorina citri OX=121845 GN=LOC103519314 PE=3 SV=1	Nucleobindin-2	LOC103519314	36.69	2739.22	-0.9	158	181		S173	DHNNPHSFEINDL	5601.24	4324.48	2933.59	4286.44	1231.17	1160.34	229.355	873.621	4.90652	0.0150223
A0A3Q0IPV4	A0A3Q0IPV4|A0A3Q0IPV4_DIACI	S	TSSGSS(+79.97)AQTLQVTPLPK	6	17	Small G protein signaling modulator 2 OS=Diaphorina citri OX=121845 GN=LOC103505206 PE=3 SV=1	Small G protein signaling modulator 2	LOC103505206	58.13	1780.86	2.8	138	154	S6:Phosphorylation (STY):1.86	S143	KTSSGSSAQTLQV	1292.15	2096.58	1251.14	1546.62	293.955	618.179	43.1799	318.438	4.85691	0.0188028
A0A3Q0JGE8	A0A3Q0JGE8|A0A3Q0JGE8_DIACI	S	FHPEDS(+79.97)QY(+79.97)Y(+79.97)SEPSAPSGPSAPANNAPSYADLVNLSK	6	36	Uncharacterized protein ZC21.3-like OS=Diaphorina citri OX=121845 GN=LOC103518590 PE=4 SV=1	Uncharacterized protein ZC21.3-like	LOC103518590	36.96	4046.63	-9	52	87	S6:Phosphorylation (STY):0.00;Y8:Phosphorylation (STY):0.00;Y9:Phosphorylation (STY):0.00	S57	RFHPEDSQYYSEP	1454.21	2558.61	2853.79	2288.87	217.083	205.89	993.027	472	4.84931	0.0219874
A0A3Q0JGE8	A0A3Q0JGE8|A0A3Q0JGE8_DIACI	Y	FHPEDS(+79.97)QY(+79.97)Y(+79.97)SEPSAPSGPSAPANNAPSYADLVNLSK	8	36	Uncharacterized protein ZC21.3-like OS=Diaphorina citri OX=121845 GN=LOC103518590 PE=4 SV=1	Uncharacterized protein ZC21.3-like	LOC103518590	36.96	4046.63	-9	52	87	S6:Phosphorylation (STY):0.00;Y8:Phosphorylation (STY):0.00;Y9:Phosphorylation (STY):0.00	Y59	HPEDSQYYSEPSA	1454.21	2558.61	2853.79	2288.87	217.083	205.89	993.027	472	4.84931	0.0219874
A0A3Q0JGE8	A0A3Q0JGE8|A0A3Q0JGE8_DIACI	Y	FHPEDS(+79.97)QY(+79.97)Y(+79.97)SEPSAPSGPSAPANNAPSYADLVNLSK	9	36	Uncharacterized protein ZC21.3-like OS=Diaphorina citri OX=121845 GN=LOC103518590 PE=4 SV=1	Uncharacterized protein ZC21.3-like	LOC103518590	36.96	4046.63	-9	52	87	S6:Phosphorylation (STY):0.00;Y8:Phosphorylation (STY):0.00;Y9:Phosphorylation (STY):0.00	Y60	PEDSQYYSEPSAP	1454.21	2558.61	2853.79	2288.87	217.083	205.89	993.027	472	4.84931	0.0219874
A0A1S3DC53	A0A1S3DC53|A0A1S3DC53_DIACI	S	ELS(+79.97)EEMGVK	3	9	Uncharacterized protein LOC103514813 OS=Diaphorina citri OX=121845 GN=LOC103514813 PE=4 SV=1	Uncharacterized protein LOC103514813	LOC103514813	42.11	1100.45	-3.1	263	271		S265	QYRKELSEEMGVK	2080.8	2540.41	2356.28	2325.83	927.275	63.3569	450.689	480.44	4.84104	0.00286673
A0A3Q0IV31	A0A3Q0IV31|A0A3Q0IV31_DIACI:A0A1S3DQH2|A0A1S3DQH2_DIACI:A0A0A7DNU3|A0A0A7DNU3_DIACI	S	M(+15.99)GIS(+79.97)QQTLVSNQQK	4	14	Facilitated trehalose transporter Tret1-2 homolog OS=Diaphorina citri OX=121845 GN=LOC103510222 PE=4 SV=1	Facilitated trehalose transporter Tret1-2 homolog	LOC103510222	46.44	1656.75	0.8	54	67	M1:Oxidation (M):1000.00;S4:Phosphorylation (STY):32.97	S57	ETKMGISQQTLVS	2094.58	1296.31	2714.56	2035.15	234.898	246.44	780.65	420.663	4.83796	0.0227196
A0A1S3DQA1	A0A1S3DQA1|A0A1S3DQA1_DIACI	S	S(+79.97)TGNVVEEK	1	9	Uncharacterized protein LOC103522806 OS=Diaphorina citri OX=121845 GN=LOC103522806 PE=4 SV=2	Uncharacterized protein LOC103522806	LOC103522806	47.09	1041.44	-1.9	368	376	S1:Phosphorylation (STY):17.01	S368	VESRKKSTGNVVE	716.103	987.994	563.743	755.947	180.919		133.107	157.013	4.81455	0.0338995
A0A3Q0IXF2	A0A3Q0IXF2|A0A3Q0IXF2_DIACI	S	SNLNDDS(+79.97)NDTAPAPK	7	15	Uncharacterized protein LOC103511321 OS=Diaphorina citri OX=121845 GN=LOC103511321 PE=3 SV=1	Uncharacterized protein LOC103511321	LOC103511321	65.46	1637.66	3	860	874	S7:Phosphorylation (STY):34.94	S866	SNLNDDSNDTAPA	7676.04	8418.8	6966.84	7687.23	266.777	2777	1746.86	1596.88	4.81391	0.00192534
A0A3Q0J0Q5	A0A3Q0J0Q5|A0A3Q0J0Q5_DIACI	S	EENPNAGLQDNDS(+79.97)DVDLEYDEDGNPIAPK	13	29	RNA helicase OS=Diaphorina citri OX=121845 GN=LOC103512860 PE=4 SV=1	RNA helicase	LOC103512860	36.65	3252.33	11.5	2	30	S13:Phosphorylation (STY):6.67	S14	GLQDNDSDVDLEY	670.386	518.041	372.891	520.44	36.3791	179.862	109.479	108.573	4.79344	0.0124542
A0A3Q0IXQ1	A0A3Q0IXQ1|A0A3Q0IXQ1_DIACI	Y	AGAYDY(+79.97)PSPEWDTVTPEAK	6	19	calcium/calmodulin-dependent protein kinase OS=Diaphorina citri OX=121845 GN=LOC103509280 PE=3 SV=1	calcium/calmodulin-dependent protein kinase	LOC103509280	25.19	2175.9	-16	205	223	Y6:Phosphorylation (STY):0.00	Y210	KAGAYDYPSPEWD	475.515	990.659	602.982	689.719	115.6	98.8397	221.257	145.232	4.74907	0.0269742
A0A3R5VSH1	A0A3R5VSH1|A0A3R5VSH1_DIACI:A0A6G5VBL4|A0A6G5VBL4_DIACI	S	KSS(+79.97)EKPDIQYMIGEK	3	15	ATP-binding cassette sub-family D member 2 OS=Diaphorina citri OX=121845 GN=ABCD2 PE=2 SV=1	ATP-binding cassette sub-family D member 2	ABCD2	26.99	1831.84	2.7	41	55	S3:Phosphorylation (STY):11.06	S43	KSNRKSSEKPDIQ	9698.82	8594.7	8038.42	8777.31	1212.48	2802.79	1538.17	1851.15	4.74156	0.000547601
A0A1S3DK96	A0A1S3DK96|A0A1S3DK96_DIACI	S	KVELPHLTS(+79.97)VDR	9	12	Uncharacterized protein LOC103519425 OS=Diaphorina citri OX=121845 GN=LOC103519425 PE=4 SV=1	Uncharacterized protein LOC103519425	LOC103519425	50.14	1472.74	-6.6	7	18	S9:Phosphorylation (STY):0.00	S15	ELPHLTSVDRIFK	8345.03	11941.7	6653.24	8980.01	2169.88	2738.91	824.233	1911.01	4.6991	0.0130549
A0A3Q0IWS8	A0A3Q0IWS8|A0A3Q0IWS8_DIACI:A0A1S3DSA7|A0A1S3DSA7_DIACI	S	KQESDS(+79.97)DEWLEVHPK	6	15	Opioid-binding protein/cell adhesion molecule homolog OS=Diaphorina citri OX=121845 GN=LOC103508829 PE=4 SV=1	Opioid-binding protein/cell adhesion molecule homolog	LOC103508829	61.28	1905.81	-2.8	439	453	S6:Phosphorylation (STY):0.00	S444	RKQESDSDEWLEV	2900.28	2616.85	3234.42	2917.18	768.869	397.042	705.593	623.835	4.67621	0.000416086
A0A3Q0II33	A0A3Q0II33|A0A3Q0II33_DIACI	S	SGYNTHS(+79.97)LDEELKK	7	14	Dentin sialophosphoprotein-like OS=Diaphorina citri OX=121845 GN=LOC113465496 PE=4 SV=1	Dentin sialophosphoprotein-like	LOC113465496	56.21	1699.75	3.8	76	89	S7:Phosphorylation (STY):15.73	S82	SGYNTHSLDEELK	1450.19	2354.51	2924.11	2242.93	416.355	114.86	914.489	481.902	4.65434	0.0226385
A0A1S3DTN6	A0A1S3D570|A0A1S3D570_DIACI:A0A1S3DTN6|A0A1S3DTN6_DIACI	S	TPVPS(+79.97)DSPK	5	9	Mucin-2 OS=Diaphorina citri OX=121845 GN=LOC103524466 PE=4 SV=1	Mucin-2	LOC103524466	30.53	1006.44	-1.1	572	580	S5:Phosphorylation (STY):0.00	S576	PKTPVPSDSPKLP	1800.44	862.893	812.636	1158.66	169.078	356.601	221.193	248.957	4.65404	0.049307
A0A3Q0IRS7	A0A3Q0IRS7|A0A3Q0IRS7_DIACI:A0A1S3CVP9|A0A1S3CVP9_DIACI:A0A3Q0ILA9|A0A3Q0ILA9_DIACI:Q0PWU1|Q0PWU1_DIACI:A0A3Q0IXA2|A0A3Q0IXA2_DIACI	S	GYS(+79.97)FTTTAER	3	10	Actin-85C-like OS=Diaphorina citri OX=121845 GN=LOC103508595 PE=4 SV=1	Actin-85C-like	LOC103508595	49.87	1211.49	-2.8	79	88	S3:Phosphorylation (STY):17.01	S81	LTERGYSFTTTAE	563.624	1231.32	1031.91	942.286	121.326	311.616	178.049	203.664	4.62667	0.0229711
A0A3Q0IQN8	A0A3Q0IQN8|A0A3Q0IQN8_DIACI:A0A3Q0J645|A0A3Q0J645_DIACI	T	GGDTIEPSTTSGT(+79.97)PIAP	13	17	Eukaryotic translation initiation factor 2 subunit 3-like OS=Diaphorina citri OX=121845 GN=LOC103508088 PE=4 SV=1	Eukaryotic translation initiation factor 2 subunit 3-like	LOC103508088	35.9	1679.73	1.8	76	92	T13:Phosphorylation (STY):9.42	T88	PSTTSGTPIAP__	1508.99	1543.82	587.488	1213.43	533.648	130.148	127.842	263.879	4.59844	0.0495636
A0A1S3D013	A0A1S3D013|A0A1S3D013_DIACI:A0A1S3CVP9|A0A1S3CVP9_DIACI	S	HQGVMVGMGQKDS(+79.97)YVGDEAQSK	13	22	Actin-1 OS=Diaphorina citri OX=121845 GN=LOC103508596 PE=3 SV=1	Actin-1	LOC103508596	33.13	2430.03	-3.7	41	62	S13:Phosphorylation (STY):0.00	S53	GMGQKDSYVGDEA	658.022	1093.93	515.462	755.803	240.69	181.519	75.4699	165.893	4.55597	0.0308864
A0A1S3D095	A0A1S3D095|A0A1S3D095_DIACI	S	STLELTNHS(+79.97)S	9	10	Facilitated trehalose transporter Tret1-like OS=Diaphorina citri OX=121845 GN=LOC103508605 PE=3 SV=1	Facilitated trehalose transporter Tret1-like	LOC103508605	48.76	1167.48	-0.9	500	509	S9:Phosphorylation (STY):0.00	S508	LELTNHSS_____	1830.97	1908.71	1533.91	1757.86	421.119	470.607	268.405	386.71	4.54568	0.000449005
A0A1S4EG57	A0A1S4EG57|A0A1S4EG57_DIACI:A0A3Q0J0T6|A0A3Q0J0T6_DIACI	S	SEEIS(+79.97)LSK	5	8	Uncharacterized protein DDB_G0283697 isoform X2 OS=Diaphorina citri OX=121845 GN=LOC103512962 PE=4 SV=1	Uncharacterized protein DDB_G0283697 isoform X2	LOC103512962	40.7	971.421	-0.9	232	239	S5:Phosphorylation (STY):14.19	S236	ERSEEISLSKRPD	1238.83	1220.63	1477.65	1312.37	343.062		236.102	289.582	4.53194	0.00292949
A0A1S4ESW4	A0A1S4ESW4|A0A1S4ESW4_DIACI	S	SMEETQS(+79.97)IEQNR	7	12	Uncharacterized protein LOC103524922 OS=Diaphorina citri OX=121845 GN=LOC103524922 PE=4 SV=1	Uncharacterized protein LOC103524922	LOC103524922	61.3	1530.6	0.6	295	306	S7:Phosphorylation (STY):48.87	S301	SMEETQSIEQNRN	5466.33	4293.02	2950.15	4236.5	1789.15	293.337	723.145	935.209	4.53	0.0179285
A0A3Q0INZ4	A0A3Q0INZ4|A0A3Q0INZ4_DIACI	S	AS(+79.97)VEKPPTPAAVK	2	13	Eukaryotic translation initiation factor 4 gamma 3-like OS=Diaphorina citri OX=121845 GN=LOC103524978 PE=4 SV=1	Eukaryotic translation initiation factor 4 gamma 3-like	LOC103524978	67.91	1373.7	-0.6	296	308	S2:Phosphorylation (STY):34.81	S297	TPQKKASVEKPPT	19624.6	15544.7	13589.3	16252.9	4000.21	885.957	5896.06	3594.08	4.52213	0.00532167
A0A1S4EFY6	A0A1S4EFY6|A0A1S4EFY6_DIACI	T	DM(+15.99)M(+15.99)ANT(+79.97)KEFIEHR	6	13	Uncharacterized protein LOC108252814 OS=Diaphorina citri OX=121845 GN=LOC108252814 PE=4 SV=1	Uncharacterized protein LOC108252814	LOC108252814	54.08	1732.69	-1.2	1186	1198		T1191	KDMMANTKEFIEH	4422.44	4418.48	6555.81	5132.24	2405.77	296.483	756.664	1152.97	4.45132	0.0141884
A0A3Q0IPJ2	A0A3Q0IPJ2|A0A3Q0IPJ2_DIACI	S	S(+79.97)ALGLDEESSSISR	1	14	LOW QUALITY PROTEIN: obscurin-like OS=Diaphorina citri OX=121845 GN=LOC103507575 PE=3 SV=1	LOW QUALITY PROTEIN: obscurin-like	LOC103507575	50.59	1529.66	3.9	778	791	S1:Phosphorylation (STY):51.56	S778	DRLTKRSALGLDE	680.817	500.122	860.692	680.544	128.286	216.413	114.019	152.906	4.45073	0.00836909
A0A3Q0JEA2	A0A3Q0JEA2|A0A3Q0JEA2_DIACI	S	ASAAILQNQS(+79.97)PK	10	12	Facilitated trehalose transporter Tret1-like OS=Diaphorina citri OX=121845 GN=LOC103519505 PE=4 SV=1	Facilitated trehalose transporter Tret1-like	LOC103519505	58.96	1306.63	-2.8	477	488	S10:Phosphorylation (STY):66.10	S486	AILQNQSPKIVVS	5048.45	2758.31	2724.83	3510.53	931.926	825.31	613.92	790.386	4.44154	0.0246423
A0A3Q0IPJ2	A0A3Q0IPJ2|A0A3Q0IPJ2_DIACI	S	QSS(+79.97)TADVSET(+79.97)PK	3	12	LOW QUALITY PROTEIN: obscurin-like OS=Diaphorina citri OX=121845 GN=LOC103507575 PE=3 SV=1	LOW QUALITY PROTEIN: obscurin-like	LOC103507575	46.89	1408.52	-0.4	2693	2704	S3:Phosphorylation (STY):0.00;T10:Phosphorylation (STY):11.10	S2695	LNSRQSSTADVSE	403.482	349.118	391.42	381.34	47.2498		124.495	85.8722	4.44079	0.00372436
A0A3Q0IPJ2	A0A3Q0IPJ2|A0A3Q0IPJ2_DIACI	T	QSS(+79.97)TADVSET(+79.97)PK	10	12	LOW QUALITY PROTEIN: obscurin-like OS=Diaphorina citri OX=121845 GN=LOC103507575 PE=3 SV=1	LOW QUALITY PROTEIN: obscurin-like	LOC103507575	46.89	1408.52	-0.4	2693	2704	S3:Phosphorylation (STY):0.00;T10:Phosphorylation (STY):11.10	T2702	TADVSETPKNLSR	403.482	349.118	391.42	381.34	47.2498		124.495	85.8722	4.44079	0.00372436
A0A3Q0JLY7	A0A3Q0JLY7|A0A3Q0JLY7_DIACI:A0A3Q0JIF1|A0A3Q0JIF1_DIACI	S	DGQQDPGLILS(+79.97)PQRR	11	15	Eukaryotic translation initiation factor 4E transporter isoform X1 OS=Diaphorina citri OX=121845 GN=LOC103521916 PE=4 SV=1	Eukaryotic translation initiation factor 4E transporter isoform X1	LOC103521916	40.45	1758.84	4.2	166	180		S176	DPGLILSPQRRSF	4692.52	3026.31	5484.71	4401.18	2016.09	880.829	88.3658	995.096	4.42287	0.020453
A0A3Q0IPJ2	A0A3Q0IPJ2|A0A3Q0IPJ2_DIACI	S	TS(+79.97)T(+79.97)AELNES(+79.97)TPK	2	12	LOW QUALITY PROTEIN: obscurin-like OS=Diaphorina citri OX=121845 GN=LOC103507575 PE=3 SV=1	LOW QUALITY PROTEIN: obscurin-like	LOC103507575	35.65	1516.51	3.5	2547	2558	S2:Phosphorylation (STY):0.00;T3:Phosphorylation (STY):11.10;S9:Phosphorylation (STY):0.00	S2548	RLSSRTSTAELNE	787.968	336.43	474.884	533.094	106.36	169.608	87.6741	121.214	4.39796	0.0387
A0A3Q0IPJ2	A0A3Q0IPJ2|A0A3Q0IPJ2_DIACI	T	TS(+79.97)T(+79.97)AELNES(+79.97)TPK	3	12	LOW QUALITY PROTEIN: obscurin-like OS=Diaphorina citri OX=121845 GN=LOC103507575 PE=3 SV=1	LOW QUALITY PROTEIN: obscurin-like	LOC103507575	35.65	1516.51	3.5	2547	2558	S2:Phosphorylation (STY):0.00;T3:Phosphorylation (STY):11.10;S9:Phosphorylation (STY):0.00	T2549	LSSRTSTAELNES	787.968	336.43	474.884	533.094	106.36	169.608	87.6741	121.214	4.39796	0.0387
A0A3Q0IPJ2	A0A3Q0IPJ2|A0A3Q0IPJ2_DIACI	S	TS(+79.97)T(+79.97)AELNES(+79.97)TPK	9	12	LOW QUALITY PROTEIN: obscurin-like OS=Diaphorina citri OX=121845 GN=LOC103507575 PE=3 SV=1	LOW QUALITY PROTEIN: obscurin-like	LOC103507575	35.65	1516.51	3.5	2547	2558	S2:Phosphorylation (STY):0.00;T3:Phosphorylation (STY):11.10;S9:Phosphorylation (STY):0.00	S2555	TAELNESTPKNLS	787.968	336.43	474.884	533.094	106.36	169.608	87.6741	121.214	4.39796	0.0387
A0A3Q0IW83	A0A3Q0IW83|A0A3Q0IW83_DIACI:A0A3Q0J1F7|A0A3Q0J1F7_DIACI:A0A3Q0IWA1|A0A3Q0IWA1_DIACI	S	LDES(+79.97)DSEIDNEIIR	4	14	Periodic tryptophan protein 1 homolog isoform X3 OS=Diaphorina citri OX=121845 GN=LOC103510758 PE=4 SV=1	Periodic tryptophan protein 1 homolog isoform X3	LOC103510758	51.86	1726.73	-1.7	97	110	S4:Phosphorylation (STY):5.99	S100	KIKLDESDSEIDN	2831.8	1830.04	1864.31	2175.38	835.011	521.074	137.741	497.942	4.36875	0.0121247
A0A3Q0IZT9	A0A3Q0IZT9|A0A3Q0IZT9_DIACI:A0A1S3DPM7|A0A1S3DPM7_DIACI:A0A1S3DNY5|A0A1S3DNY5_DIACI	T	NST(+79.97)SS(+79.97)VGSVTK	3	11	Uncharacterized protein LOC113468771 OS=Diaphorina citri OX=121845 GN=LOC113468771 PE=4 SV=1	Uncharacterized protein LOC113468771	LOC113468771	28.19	1225.46	-1	148	158	T3:Phosphorylation (STY):0.00;S5:Phosphorylation (STY):0.00	T150	SIVKNSTSSVGSV	1010.61	1389.22	626.239	1008.69	206.453	109.777	377.955	231.395	4.35917	0.0292517
A0A3Q0IZT9	A0A3Q0IZT9|A0A3Q0IZT9_DIACI:A0A1S3DPM7|A0A1S3DPM7_DIACI:A0A1S3DNY5|A0A1S3DNY5_DIACI	S	NST(+79.97)SS(+79.97)VGSVTK	5	11	Uncharacterized protein LOC113468771 OS=Diaphorina citri OX=121845 GN=LOC113468771 PE=4 SV=1	Uncharacterized protein LOC113468771	LOC113468771	28.19	1225.46	-1	148	158	T3:Phosphorylation (STY):0.00;S5:Phosphorylation (STY):0.00	S152	VKNSTSSVGSVTK	1010.61	1389.22	626.239	1008.69	206.453	109.777	377.955	231.395	4.35917	0.0292517
A0A3Q0J152	A0A3Q0J152|A0A3Q0J152_DIACI	T	DVM(+15.99)NFDSEFTKEDPVLT(+79.97)PIAADVVR	17	25	protein kinase C OS=Diaphorina citri OX=121845 GN=LOC103510986 PE=3 SV=1	protein kinase C	LOC103510986	68.01	2903.33	-6.4	257	281	M3:Oxidation (M):1000.00;T17:Phosphorylation (STY):38.64	T273	KEDPVLTPIAADV	1165.93	2250.07	1654.02	1690.01	328	202.34	636.364	388.902	4.34559	0.0184834
A0A3Q0J378	A0A3Q0J378|A0A3Q0J378_DIACI	S	DIC(+57.02)AVYSPDPDVVPLC(+57.02)DEDTS(+79.97)HER	21	24	Serotransferrin-A-like OS=Diaphorina citri OX=121845 GN=LOC103511687 PE=4 SV=1	Serotransferrin-A-like	LOC103511687	83.01	2868.16	-0.8	130	153	C3:Carbamidomethylation:1000.00;C16:Carbamidomethylation:1000.00;S21:Phosphorylation (STY):7.21	S150	LCDEDTSHERNEA	15362.5	8252.19	10010.1	11208.3	3461.25	1875.98	2412.15	2583.13	4.33903	0.016939
A0A3Q0J3H1	A0A3Q0J3H1|A0A3Q0J3H1_DIACI	S	YSDS(+79.97)PTLDETR	4	11	LOW QUALITY PROTEIN: protein virilizer homolog OS=Diaphorina citri OX=121845 GN=LOC103514199 PE=4 SV=1	LOW QUALITY PROTEIN: protein virilizer homolog	LOC103514199	48.2	1362.53	0.7	68	78	S4:Phosphorylation (STY):14.63	S71	EHKYSDSPTLDET	2132.69	2041.65	1929.02	2034.45	1078.92	110.388	236.646	475.317	4.2802	0.00730672
A0A1S4E829	A0A1S4E829|A0A1S4E829_DIACI:A0A1S3CVS3|A0A1S3CVS3_DIACI:A0A3Q0IL98|A0A3Q0IL98_DIACI	S	YS(+79.97)GS(+79.97)ENEEEETGVGGEPSSIIQAPGDNTLR	2	30	Serine/threonine-protein kinase mig-15 isoform X1 OS=Diaphorina citri OX=121845 GN=LOC103506122 PE=4 SV=1	Serine/threonine-protein kinase mig-15 isoform X1	LOC103506122	26.69	3281.33	8.5	326	355	S2:Phosphorylation (STY):0.00;S4:Phosphorylation (STY):0.00	S327	RDDYRYSGSENEE	182.108	373.463	346.919	300.83	62.2365	75.7812	73.7085	70.5754	4.26253	0.0184995
A0A1S4E829	A0A1S4E829|A0A1S4E829_DIACI:A0A1S3CVS3|A0A1S3CVS3_DIACI:A0A3Q0IL98|A0A3Q0IL98_DIACI	S	YS(+79.97)GS(+79.97)ENEEEETGVGGEPSSIIQAPGDNTLR	4	30	Serine/threonine-protein kinase mig-15 isoform X1 OS=Diaphorina citri OX=121845 GN=LOC103506122 PE=4 SV=1	Serine/threonine-protein kinase mig-15 isoform X1	LOC103506122	26.69	3281.33	8.5	326	355	S2:Phosphorylation (STY):0.00;S4:Phosphorylation (STY):0.00	S329	DYRYSGSENEEEE	182.108	373.463	346.919	300.83	62.2365	75.7812	73.7085	70.5754	4.26253	0.0184995
A0A1S3D9I6	A0A1S3D9I6|A0A1S3D9I6_DIACI	S	EFS(+79.97)M(+15.99)EDAEK	3	9	Skin secretory protein xP2-like isoform X1 OS=Diaphorina citri OX=121845 GN=LOC103514141 PE=4 SV=1	Skin secretory protein xP2-like isoform X1	LOC103514141	36.84	1180.4	-0.5	193	201		S195	VKKREFSMEDAEK	15382.2	8733.78	14077.8	12731.3	5328.31	902.514	2739.32	2990.05	4.25788	0.0154741
A0A3Q0IXB0	A0A3Q0IXB0|A0A3Q0IXB0_DIACI:A0A1S3D0K0|A0A1S3D0K0_DIACI:D7PPG4|D7PPG4_DIACI:A0A3Q0IX81|A0A3Q0IX81_DIACI:A0A3Q0J1H2|A0A3Q0J1H2_DIACI	S	VSSTLS(+79.97)GLEGELK	6	13	arginine kinase OS=Diaphorina citri OX=121845 GN=LOC103508767 PE=3 SV=1	arginine kinase	LOC103508767	62.07	1398.66	-3.4	172	184	S6:Phosphorylation (STY):46.20	S177	KVSSTLSGLEGEL	4286.87	3823.75	1843.97	3318.2	164.907	617.598	1590.67	791.057	4.19464	0.0423277
A0A3Q0J384	A0A3Q0J384|A0A3Q0J384_DIACI	S	KEDS(+79.97)C(+57.02)PIPDDYLK	4	13	Uncharacterized protein LOC113469403 OS=Diaphorina citri OX=121845 GN=LOC113469403 PE=4 SV=1	Uncharacterized protein LOC113469403	LOC113469403	36.62	1658.69	2.7	752	764	S4:Phosphorylation (STY):38.64;C5:Carbamidomethylation:1000.00	S755	PRKKEDSCPIPDD	2494.72	1226.69	1912.84	1878.08	691.346	583.623	69.7499	448.239	4.18991	0.025889
A0A3Q0IT83	A0A3Q0IT83|A0A3Q0IT83_DIACI:A0A3Q0IT75|A0A3Q0IT75_DIACI	T	GAANPPVFDGSSSQPAILNPTQEIT(+79.97)PPPNYAK	25	32	Secretory carrier-associated membrane protein OS=Diaphorina citri OX=121845 GN=LOC103509284 PE=3 SV=1	Secretory carrier-associated membrane protein	LOC103509284	68.74	3357.59	1	23	54	T25:Phosphorylation (STY):8.26	T47	NPTQEITPPPNYA	12636.3	13514.7	13400.6	13183.9	5439.02	896.102	3202.12	3179.08	4.14707	0.00172068
A0A1S4EMF3	A0A1S4EMF3|A0A1S4EMF3_DIACI	S	LAAS(+79.97)GFTHK	4	9	CLIP-associating protein-like OS=Diaphorina citri OX=121845 GN=LOC103518621 PE=4 SV=1	CLIP-associating protein-like	LOC103518621	31.57	1010.46	-14	138	146	S4:Phosphorylation (STY):5.08	S141	FDRLAASGFTHKN	10864.7	5615.79	6650.98	7710.49	3160.67	484.506	1941.93	1862.37	4.14015	0.0304415
A0A1S3DHF8	A0A1S3DHF8|A0A1S3DHF8_DIACI	T	KTTVSTPSTPT(+79.97)AASAPVAQPTPPPQQNIVR	11	30	Zinc finger protein 319 OS=Diaphorina citri OX=121845 GN=LOC103518664 PE=4 SV=1	Zinc finger protein 319	LOC103518664	39.66	3121.58	1.9	179	208	T11:Phosphorylation (STY):0.00	T189	STPSTPTAASAPV	945.179	1700.76	923.734	1189.89	532.837	193.462	146.129	290.809	4.09166	0.0336501
A0A3Q0J2F5	A0A3Q0J2F5|A0A3Q0J2F5_DIACI	S	KES(+79.97)ILDLSK	3	9	U6 snRNA-associated Sm-like protein LSm7 OS=Diaphorina citri OX=121845 GN=LOC113469277 PE=3 SV=1	U6 snRNA-associated Sm-like protein LSm7	LOC113469277	47.41	1111.55	-1.8	20	28	S3:Phosphorylation (STY):46.62	S22	DRKRKESILDLSK	6366.83	6713.62	3761.53	5613.99	2058.96	257.172	1852.63	1389.59	4.04004	0.0180064
A0A3Q0J2Y2	A0A3Q0J2Y2|A0A3Q0J2Y2_DIACI	S	SLS(+79.97)PAYDPTSINK	3	13	Membrane magnesium transporter 1 OS=Diaphorina citri OX=121845 GN=LOC103511879 PE=4 SV=1	Membrane magnesium transporter 1	LOC103511879	52.64	1471.66	-4.5	95	107	S3:Phosphorylation (STY):14.04	S97	HRGRSLSPAYDPT	3242.71	2227.81	2627.38	2699.3	958.958	417.754	637.466	671.393	4.02045	0.00373377
A0A3Q0J4M6	A0A3Q0J4M6|A0A3Q0J4M6_DIACI	S	DS(+79.97)SSPEINYEATSSSSPPPR	2	20	choline-phosphate cytidylyltransferase OS=Diaphorina citri OX=121845 GN=LOC103514747 PE=3 SV=1	choline-phosphate cytidylyltransferase	LOC103514747	60.22	2186.9	4.7	234	253	S2:Phosphorylation (STY):0.00	S235	RSRGRDSSSPEIN	1911.84	3648.48	3938.47	3166.26	1223.6	664.074	497.956	795.209	3.98168	0.0240103
A0A1S3CUS1	A0A1S3CUS1|A0A1S3CUS1_DIACI:A0A3Q0IZ57|A0A3Q0IZ57_DIACI	S	FLFS(+79.97)S(+79.97)DESSSSLHSR	4	15	High mobility group B protein 7-like OS=Diaphorina citri OX=121845 GN=LOC103505639 PE=4 SV=1	High mobility group B protein 7-like	LOC103505639	39.2	1844.7	1.4	117	131	S4:Phosphorylation (STY):28.74;S5:Phosphorylation (STY):34.94	S120	KKRFLFSSDESSS	4002.34	4568.48	3280.05	3950.29	1485.23	679.099	812.46	992.262	3.98109	0.0027403
A0A1S3CUS1	A0A1S3CUS1|A0A1S3CUS1_DIACI:A0A3Q0IZ57|A0A3Q0IZ57_DIACI	S	FLFS(+79.97)S(+79.97)DESSSSLHSR	5	15	High mobility group B protein 7-like OS=Diaphorina citri OX=121845 GN=LOC103505639 PE=4 SV=1	High mobility group B protein 7-like	LOC103505639	39.2	1844.7	1.4	117	131	S4:Phosphorylation (STY):28.74;S5:Phosphorylation (STY):34.94	S121	KRFLFSSDESSSS	4002.34	4568.48	3280.05	3950.29	1485.23	679.099	812.46	992.262	3.98109	0.0027403
A0A3Q0J7R1	A0A3Q0J7R1|A0A3Q0J7R1_DIACI	S	NPVSTS(+79.97)PQPAASQSYNPK	6	18	LOW QUALITY PROTEIN: AP-2 complex subunit alpha OS=Diaphorina citri OX=121845 GN=LOC103516257 PE=4 SV=1	LOW QUALITY PROTEIN: AP-2 complex subunit alpha	LOC103516257	53.95	1951.87	2.6	392	409	S6:Phosphorylation (STY):10.11	S397	GNPVSTSPQPAAS	12604.6	7218.76	15777.5	11866.9	960.795	1159.77	6842.58	2987.72	3.97191	0.0481362
A0A3Q0IWF3	A0A3Q0IWF3|A0A3Q0IWF3_DIACI	S	DEVDTS(+79.97)DINEDVDSTQEK	6	18	Uncharacterized protein DDB_G0283697-like OS=Diaphorina citri OX=121845 GN=LOC108252600 PE=4 SV=1	Uncharacterized protein DDB_G0283697-like	LOC108252600	59.48	2117.82	15.6	406	423	S6:Phosphorylation (STY):17.01	S411	KDEVDTSDINEDV	324.241	647.015	552.472	507.909	117.79	134.588	132.554	128.311	3.95844	0.0167307
A0A3Q0IJL7	A0A3Q0IJL7|A0A3Q0IJL7_DIACI	S	SPSKS(+79.97)PLDNQYGR	5	13	Dentin sialophosphoprotein-like OS=Diaphorina citri OX=121845 GN=LOC103505284 PE=4 SV=1	Dentin sialophosphoprotein-like	LOC103505284	52.09	1527.67	1.9	431	443	S5:Phosphorylation (STY):16.51	S435	GRSPSKSPLDNQY	2179.88	2851.81	1162.33	2064.67	570.339	255.253	741.482	522.358	3.9526	0.0393059
A0A1S3CY85	A0A1S3CY85|A0A1S3CY85_DIACI	T	LNHDT(+79.97)S(+79.97)EEEKNANSIYYR	5	18	Uncharacterized protein LOC103507527 OS=Diaphorina citri OX=121845 GN=LOC103507527 PE=4 SV=1	Uncharacterized protein LOC103507527	LOC103507527	46.41	2341.93	-0.5	1301	1318	T5:Phosphorylation (STY):46.57;S6:Phosphorylation (STY):49.35	T1305	CKLNHDTSEEEKN	20455.9	12098.1	23763.8	18772.6	9964.45	1194.18	3136.34	4764.99	3.93969	0.0327978
A0A1S3CY85	A0A1S3CY85|A0A1S3CY85_DIACI	S	LNHDT(+79.97)S(+79.97)EEEKNANSIYYR	6	18	Uncharacterized protein LOC103507527 OS=Diaphorina citri OX=121845 GN=LOC103507527 PE=4 SV=1	Uncharacterized protein LOC103507527	LOC103507527	46.41	2341.93	-0.5	1301	1318	T5:Phosphorylation (STY):46.57;S6:Phosphorylation (STY):49.35	S1306	KLNHDTSEEEKNA	20455.9	12098.1	23763.8	18772.6	9964.45	1194.18	3136.34	4764.99	3.93969	0.0327978
A0A3Q0IXZ6	A0A3Q0IXZ6|A0A3Q0IXZ6_DIACI:A0A1S3D4V7|A0A1S3D4V7_DIACI:A0A3Q0J2A7|A0A3Q0J2A7_DIACI	S	S(+79.97)VTFPLSSTLQPGEVADEK	1	19	non-specific serine/threonine protein kinase OS=Diaphorina citri OX=121845 GN=LOC103511543 PE=4 SV=1	non-specific serine/threonine protein kinase	LOC103511543	78.57	2083.97	2.6	424	442	S1:Phosphorylation (STY):20.41	S424	GTPRKKSVTFPLS	33156.9	35636.9	22195.3	30329.7	2301.25	11324.7	9474.76	7700.23	3.93881	0.0103384
A0A3Q0J3F8	A0A3Q0J3F8|A0A3Q0J3F8_DIACI	S	DWESDGKES(+79.97)LDDDKYK	9	16	Protein PRRC2C OS=Diaphorina citri OX=121845 GN=LOC103512130 PE=4 SV=1	Protein PRRC2C	LOC103512130	33.04	2008.79	-1.7	989	1004	S9:Phosphorylation (STY):0.00	S997	ESDGKESLDDDKY	2484.19	2183.64	2712.15	2459.99	918.253	266.975	699.472	628.233	3.91573	0.0017117
A0A1S4E6N7	A0A1S4E6N7|A0A1S4E6N7_DIACI	T	T(+79.97)PNGEYIKPVVNVGDK	1	16	Uncharacterized protein LOC103505344 OS=Diaphorina citri OX=121845 GN=LOC103505344 PE=3 SV=1	Uncharacterized protein LOC103505344	LOC103505344	35.74	1808.87	4.9	62	77	T1:Phosphorylation (STY):19.39	T62	VGPGARTPNGEYI	2423.57	2373.56	1983.47	2260.2	982.183	336.742	424.839	581.255	3.88849	0.00238547
A0A3Q0JCM1	A0A3Q0JCM1|A0A3Q0JCM1_DIACI	S	GGS(+79.97)PSAFDR	3	9	ATP-dependent 6-phosphofructokinase OS=Diaphorina citri OX=121845 GN=LOC103516513 PE=4 SV=1	ATP-dependent 6-phosphofructokinase	LOC103516513	59.19	972.37	-3.8	93	101	S3:Phosphorylation (STY):45.01	S95	HVQRGGSPSAFDR	58844.7	53671	41193.3	51236.3	19493.5	787.244	19322.1	13200.9	3.88127	0.00942823
A0A3Q0J321	A0A3Q0J321|A0A3Q0J321_DIACI	S	SS(+79.97)SVINPPK	2	9	LOW QUALITY PROTEIN: microtubule-actin cross-linking factor 1, isoforms 1/2/3/5 OS=Diaphorina citri OX=121845 GN=LOC103512109 PE=4 SV=1	LOW QUALITY PROTEIN: microtubule-actin cross-linking factor 1, isoforms 1/2/3/5	LOC103512109	48.23	1007.47	-2.1	5107	5115	S2:Phosphorylation (STY):0.00	S5108	PGKRRSSSVINPP	1609.28	797.8	1383.09	1263.39	87.8441	177.48	712.569	325.964	3.87585	0.039248
A0A1S3CYI8	A0A1S3CYI8|A0A1S3CYI8_DIACI:A0A1S3CX82|A0A1S3CX82_DIACI	S	TGAGS(+79.97)GGMWR	5	10	Protein transport protein Sec61 subunit beta-like OS=Diaphorina citri OX=121845 GN=LOC103507004 PE=3 SV=1	Protein transport protein Sec61 subunit beta-like	LOC103507004	43.49	1058.4	-1.7	47	56	S5:Phosphorylation (STY):29.57	S51	NRTGAGSGGMWRY	1487.39	600.674	1583.82	1223.96	442.648	219.718	285.548	315.971	3.87364	0.0469019
A0A3Q0JG04	A0A3Q0JG04|A0A3Q0JG04_DIACI	T	LEKLDIDPSVPET(+79.97)PPAGSEPPVPPK	13	25	Uncharacterized protein LOC103518349 OS=Diaphorina citri OX=121845 GN=LOC103518349 PE=4 SV=1	Uncharacterized protein LOC103518349	LOC103518349	38.21	2688.33	-8.4	1195	1219	T13:Phosphorylation (STY):10.19	T1207	DPSVPETPPAGSE		493.485	633.994	563.739	141.341	151.301		146.321	3.85276	0.0273091
A0A3Q0JF97	A0A3Q0JF97|A0A3Q0JF97_DIACI	S	APDGTS(+79.97)IADATGGAGSNTHGVK	6	22	Bumetanide-sensitive sodium-(Potassium)-chloride cotransporter OS=Diaphorina citri OX=121845 GN=LOC103517981 PE=4 SV=1	Bumetanide-sensitive sodium-(Potassium)-chloride cotransporter	LOC103517981	51.32	2062.9	1.6	117	138	S6:Phosphorylation (STY):0.00	S122	RAPDGTSIADATG	21881.4	10685.4	15497.4	16021.4	3753.86	4498.1	4225.86	4159.28	3.85196	0.0217717
A0A1S4E797	A0A1S4E797|A0A1S4E797_DIACI:A0A1S3D289|A0A1S3D289_DIACI	T	TAAPASAAAPGT(+79.97)PK	12	14	Chromatin-remodeling complex ATPase chain Iswi-like OS=Diaphorina citri OX=121845 GN=LOC103505831 PE=4 SV=1	Chromatin-remodeling complex ATPase chain Iswi-like	LOC103505831	60.09	1289.6	-0.4	113	126	T12:Phosphorylation (STY):0.00	T124	SAAAPGTPKAKGR	1741.85	1547.95	2874.93	2054.91	641.146	425.303	536.108	534.186	3.84681	0.0220829
A0A3Q0JFC8	A0A3Q0JFC8|A0A3Q0JFC8_DIACI	S	DEEDGS(+79.97)IPDVTMR	6	13	Uncharacterized protein LOC103517521 OS=Diaphorina citri OX=121845 GN=LOC103517521 PE=4 SV=1	Uncharacterized protein LOC103517521	LOC103517521	64.98	1542.59	3.7	22	34	S6:Phosphorylation (STY):61.30	S27	RDEEDGSIPDVTM	1343.19	791.794	1230.73	1121.91	192.828	93.6404	589.696	292.055	3.84142	0.0214829
A0A3Q0ILV3	A0A3Q0ILV3|A0A3Q0ILV3_DIACI	S	RIS(+79.97)SDFIQR	3	9	ATPase family AAA domain-containing protein 1-like OS=Diaphorina citri OX=121845 GN=LOC103506364 PE=4 SV=1	ATPase family AAA domain-containing protein 1-like	LOC103506364	51.77	1200.57	-4.3	100	108	S3:Phosphorylation (STY):17.01	S102	ASFRRISSDFIQR	18728.1	17440.1	12034.8	16067.7	3948.26	4133.96	4518.35	4200.19	3.82546	0.00448269
A0A1S3D7E3	A0A1S3D7E3|A0A1S3D7E3_DIACI	S	IVSLFDDDS(+79.97)DDDIIEPSVPQK	9	21	Nucleolar protein dao-5-like OS=Diaphorina citri OX=121845 GN=LOC103513001 PE=4 SV=1	Nucleolar protein dao-5-like	LOC103513001	76.82	2426.08	-0.4	458	478	S9:Phosphorylation (STY):36.20	S466	SLFDDDSDDDIIE	46871.9	29760.5	19767.6	32133.3	3985.28	11531.5	9784.89	8433.9	3.81002	0.0451224
A0A3Q0JC35	A0A3Q0JC35|A0A3Q0JC35_DIACI	S	SPS(+79.97)EQELIHSSK	3	12	Patatin-like phospholipase domain-containing protein 7 OS=Diaphorina citri OX=121845 GN=LOC113471266 PE=4 SV=1	Patatin-like phospholipase domain-containing protein 7	LOC113471266	57.54	1420.62	-0.4	18	29	S3:Phosphorylation (STY):0.00	S20	HLPRSPSEQELIH	11098.8	8312.44	6484.62	8631.96	2623.37	3694.39	590.36	2302.71	3.74861	0.0174824
A0A3Q0J3H2	A0A3Q0J3H2|A0A3Q0J3H2_DIACI	S	QIEELDVVSSS(+79.97)PK	11	13	SRSF protein kinase 3-like OS=Diaphorina citri OX=121845 GN=LOC103512158 PE=4 SV=1	SRSF protein kinase 3-like	LOC103512158	56.84	1509.7	-0.5	331	343	S11:Phosphorylation (STY):7.65	S341	LDVVSSSPKCNSG	5017.11	2499.92	2845.88	3454.3	941.466	578.43	1247.88	922.591	3.74414	0.0354904
A0A3Q0IW68	A0A3Q0IW68|A0A3Q0IW68_DIACI	S	APS(+79.97)PPPNC(+57.02)DVFVEFNLPPPPC(+57.02)PSAPQVNPVDVTVEK	3	36	Rho GTPase-activating protein gacF OS=Diaphorina citri OX=121845 GN=LOC103510749 PE=4 SV=1	Rho GTPase-activating protein gacF	LOC103510749	58.56	3990.86	1.5	355	390	S3:Phosphorylation (STY):21.71;C8:Carbamidomethylation:1000.00;C21:Carbamidomethylation:1000.00	S357	NKHRAPSPPPNCD		2848.24	2793.66	2820.95	863.016	727.221	679.153	756.463	3.72913	0.000100796
A0A3Q0J4M6	A0A3Q0J4M6|A0A3Q0J4M6_DIACI	S	LDYSS(+79.97)TSPGVRPR	5	13	choline-phosphate cytidylyltransferase OS=Diaphorina citri OX=121845 GN=LOC103514747 PE=3 SV=1	choline-phosphate cytidylyltransferase	LOC103514747	26.11	1513.69	12.1	258	270	S5:Phosphorylation (STY):0.00	S262	LRLDYSSTSPGVR	7113.15	3385.15	5347.71	5282	1451.35	1989.97	808.75	1416.69	3.72842	0.0267289
A0A1S3DG55	A0A1S3DG55|A0A1S3DG55_DIACI:A0A3Q0JAL7|A0A3Q0JAL7_DIACI	S	GGGTS(+79.97)PPLVFAR	5	12	E3 ubiquitin-protein ligase UBR5-like OS=Diaphorina citri OX=121845 GN=LOC103517676 PE=4 SV=1	E3 ubiquitin-protein ligase UBR5-like	LOC103517676	48.84	1237.59	1.5	124	135	S5:Phosphorylation (STY):0.00	S128	RRGGGTSPPLVFA	691.881	762.723	1318.25	924.284	417.07	174.588	154.866	248.841	3.71435	0.0349114
A0A3Q0J5H7	A0A3Q0J5H7|A0A3Q0J5H7_DIACI	S	TTAIS(+79.97)AEPLK	5	10	PDZ and LIM domain protein Zasp-like OS=Diaphorina citri OX=121845 GN=LOC103515161 PE=4 SV=1	PDZ and LIM domain protein Zasp-like	LOC103515161	29.98	1109.54	-4.2	653	662	S5:Phosphorylation (STY):33.81	S657	VKTTAISAEPLKS	272.48	317.865	216.96	269.102		85.7653	59.3617	72.5635	3.7085	0.0149926
A0A3Q0IX48	A0A3Q0IX48|A0A3Q0IX48_DIACI	S	GYTS(+79.97)DSELVAK	4	11	LOW QUALITY PROTEIN: Golgi-specific brefeldin A-resistance guanine nucleotide exchange factor 1-like OS=Diaphorina citri OX=121845 GN=LOC103511171 PE=4 SV=1	LOW QUALITY PROTEIN: Golgi-specific brefeldin A-resistance guanine nucleotide exchange factor 1-like	LOC103511171	51.49	1248.53	-1.2	1225	1235	S4:Phosphorylation (STY):12.81	S1228	NERGYTSDSELVA	12778.3	10638.7	10843.2	11420.1	4492.81	1129.1	3636.56	3086.15	3.70042	0.00238666
A0A3Q0J4A1	A0A3Q0J4A1|A0A3Q0J4A1_DIACI	S	NAS(+79.97)PTPGTHNPQTASPLAGER	3	21	Uncharacterized protein LOC103512184 OS=Diaphorina citri OX=121845 GN=LOC103512184 PE=4 SV=1	Uncharacterized protein LOC103512184	LOC103512184	48.28	2181.98	1.1	305	325	S3:Phosphorylation (STY):8.22	S307	KLKKNASPTPGTH	1354.05	1834.05	1742.57	1643.56	946.831	256.772	136.523	446.709	3.67926	0.0149036
A0A1S4EBM8	A0A1S4EBM8|A0A1S4EBM8_DIACI	S	EYIKS(+79.97)LENK	5	9	Trichohyalin-like isoform X3 OS=Diaphorina citri OX=121845 GN=LOC103509294 PE=4 SV=1	Trichohyalin-like isoform X3	LOC103509294	54.6	1202.56	-1.4	278	286	S5:Phosphorylation (STY):69.29	S282	HKEYIKSLENKEG	25793	11312.9	22187.9	19764.6	10314.2	1778.3	4027.07	5373.18	3.67838	0.0463096
A0A1S3CTX3	A0A1S3CTX3|A0A1S3CTX3_DIACI	S	RPSSSVAAVFGDAS(+79.97)DEEPEEM(+15.99)PPEAK	14	26	PEST proteolytic signal-containing nuclear protein OS=Diaphorina citri OX=121845 GN=LOC103505175 PE=4 SV=1	PEST proteolytic signal-containing nuclear protein	LOC103505175	61.02	2827.19	-7	69	94	S14:Phosphorylation (STY):41.98;M21:Oxidation (M):1000.00	S82	AVFGDASDEEPEE	2147.64	3038.38	2469.12	2551.71	866.55	662.917	553.195	694.221	3.67565	0.00254404
A0A3Q0J3F8	A0A3Q0J3F8|A0A3Q0J3F8_DIACI	S	DWES(+79.97)DGKESLDDDKYK	4	16	Protein PRRC2C OS=Diaphorina citri OX=121845 GN=LOC103512130 PE=4 SV=1	Protein PRRC2C	LOC103512130	37.52	2008.79	-3.2	989	1004	S4:Phosphorylation (STY):23.70	S992	IEKDWESDGKESL	2484.19	2183.64	2712.15	2459.99	918.253	278.883	830.422	675.853	3.63984	0.00209814
A0A1S3DBI6	A0A1S3DBI6|A0A1S3DBI6_DIACI:A0A1S3DBA0|A0A1S3DBA0_DIACI:A0A1S3DBH7|A0A1S3DBH7_DIACI	S	ANS(+79.97)AGEEEES(+79.97)LSR	3	13	Formin-binding protein 1-like isoform X1 OS=Diaphorina citri OX=121845 GN=LOC103515191 PE=4 SV=1	Formin-binding protein 1-like isoform X1	LOC103515191	35.25	1537.53	15.8	492	504	S3:Phosphorylation (STY):32.47;S10:Phosphorylation (STY):8.22	S494	RDERANSAGEEEE	4993.81	10478	6558.46	7343.41	1208.5	1964.81	2888.04	2020.45	3.63454	0.0352603
A0A1S3DBI6	A0A1S3DBI6|A0A1S3DBI6_DIACI:A0A1S3DBA0|A0A1S3DBA0_DIACI:A0A1S3DBH7|A0A1S3DBH7_DIACI	S	ANS(+79.97)AGEEEES(+79.97)LSR	10	13	Formin-binding protein 1-like isoform X1 OS=Diaphorina citri OX=121845 GN=LOC103515191 PE=4 SV=1	Formin-binding protein 1-like isoform X1	LOC103515191	35.25	1537.53	15.8	492	504	S3:Phosphorylation (STY):32.47;S10:Phosphorylation (STY):8.22	S501	AGEEEESLSRSAS	4993.81	10478	6558.46	7343.41	1208.5	1964.81	2888.04	2020.45	3.63454	0.0352603
A0A3Q0JK51	A0A3Q0JK51|A0A3Q0JK51_DIACI	T	EFFNLATSSQVT(+79.97)K	12	13	Vitellogenin-A1-like OS=Diaphorina citri OX=121845 GN=LOC103523199 PE=4 SV=1	Vitellogenin-A1-like	LOC103523199	55.75	1550.7	-3	1327	1339	T12:Phosphorylation (STY):9.42	T1338	ATSSQVTKQAHLN	1054.24	673.206	614.397	780.615	265.527	248.391	133.972	215.963	3.61458	0.0171965
A0A3Q0IUT0	A0A3Q0IUT0|A0A3Q0IUT0_DIACI:Q0PXW0|Q0PXW0_DIACI:A0A1S3D9I6|A0A1S3D9I6_DIACI	T	ENSLPT(+79.97)PAH	6	9	Transmembrane protein 245 OS=Diaphorina citri OX=121845 GN=LOC103510064 PE=3 SV=1	Transmembrane protein 245	LOC103510064	39.14	1044.43	-0.7	738	746	T6:Phosphorylation (STY):44.44	T743	RENSLPTPAH___	5252.49	4769.58	4125.11	4715.73	3204.73	133.406	596.041	1311.39	3.59597	0.0280512
A0A3Q0IQ14	A0A3Q0IQ14|A0A3Q0IQ14_DIACI:A0A1S3CYM6|A0A1S3CYM6_DIACI:A0A1S3CYN3|A0A1S3CYN3_DIACI:A0A1S3CYM1|A0A1S3CYM1_DIACI:A0A1S3CZZ4|A0A1S3CZZ4_DIACI:A0A1S3CYL6|A0A1S3CYL6_DIACI:A0A1S3CYN8|A0A1S3CYN8_DIACI	S	SLNAPS(+79.97)PIQQFGPC(+57.02)GR	6	16	NAD(+) kinase OS=Diaphorina citri OX=121845 GN=LOC103507804 PE=3 SV=1	NAD(+) kinase	LOC103507804	51.21	1807.81	-0.8	77	92	S6:Phosphorylation (STY):30.64;C14:Carbamidomethylation:1000.00	S82	RSLNAPSPIQQFG	739.147	291.782	533.373	521.434	69.6845	180.645	188.971	146.434	3.56089	0.0498031
A0A3Q0IPJ2	A0A3Q0IPJ2|A0A3Q0IPJ2_DIACI	S	FS(+79.97)LQLNPGK	2	9	LOW QUALITY PROTEIN: obscurin-like OS=Diaphorina citri OX=121845 GN=LOC103507575 PE=3 SV=1	LOW QUALITY PROTEIN: obscurin-like	LOC103507575	55.18	1082.52	-3.5	3946	3954		S3947	ETIPRFSLQLNPG	3797.38	3832.34	2968.25	3532.66	1526.34	1076.26	397.253	999.951	3.53283	0.00425898
A0A1S3CY85	A0A1S3CY85|A0A1S3CY85_DIACI	T	T(+79.97)SVDES(+79.97)YER	1	9	Uncharacterized protein LOC103507527 OS=Diaphorina citri OX=121845 GN=LOC103507527 PE=4 SV=1	Uncharacterized protein LOC103507527	LOC103507527	34.18	1244.4	-0.5	650	658	T1:Phosphorylation (STY):0.00;S6:Phosphorylation (STY):14.02	T650	DKSKPRTSVDESY	2572.63	2077.21	2334.32	2328.05	1650.95	99.1093	232.532	660.865	3.52274	0.0320854
A0A1S3CY85	A0A1S3CY85|A0A1S3CY85_DIACI	S	T(+79.97)SVDES(+79.97)YER	6	9	Uncharacterized protein LOC103507527 OS=Diaphorina citri OX=121845 GN=LOC103507527 PE=4 SV=1	Uncharacterized protein LOC103507527	LOC103507527	34.18	1244.4	-0.5	650	658	T1:Phosphorylation (STY):0.00;S6:Phosphorylation (STY):14.02	S655	RTSVDESYERYKR	2572.63	2077.21	2334.32	2328.05	1650.95	99.1093	232.532	660.865	3.52274	0.0320854
A0A1S3DGB8	A0A1S3DGB8|A0A1S3DGB8_DIACI:A0A1S3DG36|A0A1S3DG36_DIACI	S	ASPGHYEFGNSELS(+79.97)YK	14	16	PDZ and LIM domain protein 3 isoform X2 OS=Diaphorina citri OX=121845 GN=LOC103517780 PE=4 SV=1	PDZ and LIM domain protein 3 isoform X2	LOC103517780	25.98	1864.77	0.4	203	218	S14:Phosphorylation (STY):7.77	S216	FGNSELSYKQKVA	2553.42	1706.54	1853.64	2037.87	406.101	760.412	569.194	578.569	3.52226	0.00651311
A0A3Q0IRP4	A0A3Q0IRP4|A0A3Q0IRP4_DIACI:A0A3Q0JG62|A0A3Q0JG62_DIACI	S	NVS(+79.97)PDTEGIVYR	3	12	Lysosomal-trafficking regulator-like OS=Diaphorina citri OX=121845 GN=LOC113467130 PE=4 SV=1	Lysosomal-trafficking regulator-like	LOC113467130	62.86	1428.63	-3.1	1134	1145	S3:Phosphorylation (STY):56.34	S1136	KTKKNVSPDTEGI	5544.15	3327.56	3487.84	4119.85	956.134	1181.1	1374.27	1170.5	3.51973	0.0151635
A0A3Q0IZI2	A0A3Q0IZI2|A0A3Q0IZI2_DIACI	S	SS(+79.97)ENSVIELR	2	10	Peroxidase-like OS=Diaphorina citri OX=121845 GN=LOC113468741 PE=4 SV=1	Peroxidase-like	LOC113468741	62.69	1212.54	-2.7	70	79	S2:Phosphorylation (STY):0.00	S71	VGEDRSSENSVIE	19458.8	13036.4	8298.83	13598	4098.02	1513.88	5994.89	3868.93	3.51467	0.0492195
A0A3Q0J0V5	A0A3Q0J0V5|A0A3Q0J0V5_DIACI	S	S(+79.97)FNVEEFEK	1	9	Protein PIF-like OS=Diaphorina citri OX=121845 GN=LOC113467983 PE=4 SV=1	Protein PIF-like	LOC113467983	54.58	1207.48	-4.1	203	211		S203	PFDIGKSFNVEEF	324.061	467.947	535.512	442.507	101.405		150.999	126.202	3.50633	0.0313651
A0A3Q0IRV1	A0A3Q0IRV1|A0A3Q0IRV1_DIACI	S	SFNSIEDETNQS(+79.97)SDS(+79.97)TRPPSPDFIR	12	25	Uncharacterized protein LOC103506515 OS=Diaphorina citri OX=121845 GN=LOC103506515 PE=4 SV=1	Uncharacterized protein LOC103506515	LOC103506515	38.54	2985.21	4.9	38	62	S12:Phosphorylation (STY):0.00;S15:Phosphorylation (STY):0.00	S49	EDETNQSSDSTRP	1321.32	1438.16	1214.54	1324.67	37.9297	379.671	719.764	379.121	3.49406	0.0103033
A0A3Q0IRV1	A0A3Q0IRV1|A0A3Q0IRV1_DIACI	S	SFNSIEDETNQS(+79.97)SDS(+79.97)TRPPSPDFIR	15	25	Uncharacterized protein LOC103506515 OS=Diaphorina citri OX=121845 GN=LOC103506515 PE=4 SV=1	Uncharacterized protein LOC103506515	LOC103506515	38.54	2985.21	4.9	38	62	S12:Phosphorylation (STY):0.00;S15:Phosphorylation (STY):0.00	S52	TNQSSDSTRPPSP	1321.32	1438.16	1214.54	1324.67	37.9297	379.671	719.764	379.121	3.49406	0.0103033
A0A1S4E829	A0A1S4E829|A0A1S4E829_DIACI:A0A3Q0IN68|A0A3Q0IN68_DIACI:A0A1S3CVS3|A0A1S3CVS3_DIACI:A0A3Q0IL98|A0A3Q0IL98_DIACI	T	TSSVLPDLLTQT(+79.97)SSSSGAPGQR	12	22	Serine/threonine-protein kinase mig-15 isoform X1 OS=Diaphorina citri OX=121845 GN=LOC103506122 PE=4 SV=1	Serine/threonine-protein kinase mig-15 isoform X1	LOC103506122	35.84	2268.06	0.3	876	897	T12:Phosphorylation (STY):0.00	T887	PDLLTQTSSSSGA	610.388	798.344	853.963	754.232	72.9121	147.434	427.268	215.871	3.49389	0.0145993
A0A1S3CY85	A0A1S3CY85|A0A1S3CY85_DIACI	S	TS(+79.97)VDES(+79.97)YER	2	9	Uncharacterized protein LOC103507527 OS=Diaphorina citri OX=121845 GN=LOC103507527 PE=4 SV=1	Uncharacterized protein LOC103507527	LOC103507527	29.71	1244.4	2.9	650	658	S2:Phosphorylation (STY):0.00;S6:Phosphorylation (STY):0.00	S651	KSKPRTSVDESYE	3486.66	2077.21	2334.32	2632.73	1650.95	112.221	498.651	753.942	3.49195	0.0413322
A0A1S3CY85	A0A1S3CY85|A0A1S3CY85_DIACI	S	TS(+79.97)VDES(+79.97)YER	6	9	Uncharacterized protein LOC103507527 OS=Diaphorina citri OX=121845 GN=LOC103507527 PE=4 SV=1	Uncharacterized protein LOC103507527	LOC103507527	29.71	1244.4	2.9	650	658	S2:Phosphorylation (STY):0.00;S6:Phosphorylation (STY):0.00	S655	RTSVDESYERYKR	3486.66	2077.21	2334.32	2632.73	1650.95	112.221	498.651	753.942	3.49195	0.0413322
A0A3Q0IVR9	A0A3Q0IVR9|A0A3Q0IVR9_DIACI	S	AFHQETLDDGVDSDDSS(+79.97)SSEGDEGVSPK	17	28	Inositol 1,4,5-trisphosphate receptor OS=Diaphorina citri OX=121845 GN=LOC103507937 PE=3 SV=1	Inositol 1,4,5-trisphosphate receptor	LOC103507937	47.33	2989.16	-3	2023	2050	S17:Phosphorylation (STY):0.00	S2039	VDSDDSSSSEGDE	1164.32	1409.41	1620.43	1398.05	161.034	248.246	795.436	401.572	3.48145	0.0138991
A0A1S3CYY8	A0A1S3CYY8|A0A1S3CYY8_DIACI	S	KTS(+79.97)PPFR	3	7	Membrane-associated guanylate kinase, WW and PDZ domain-containing protein 2 OS=Diaphorina citri OX=121845 GN=LOC103507268 PE=4 SV=1	Membrane-associated guanylate kinase, WW and PDZ domain-containing protein 2	LOC103507268	31.79	911.427	-2.8	689	695	S3:Phosphorylation (STY):27.96	S691	LQHKKTSPPFRSK	2225.99	2136.38	2518.76	2293.71	1701.08	99.6936	178.833	659.868	3.47601	0.0376181
A0A1S3DM78	A0A1S3DM78|A0A1S3DM78_DIACI	S	S(+79.97)IGKDTYLLR	1	10	Disorganized muscle protein 1-like OS=Diaphorina citri OX=121845 GN=LOC103521012 PE=4 SV=1	Disorganized muscle protein 1-like	LOC103521012	53.24	1244.62	-1.7	119	128	S1:Phosphorylation (STY):38.32	S119	IKMSKKSIGKDTY	857.345	574.553	677.17	703.023	119.543	149.357	338.264	202.388	3.47364	0.0095597
A0A1S4EM31	A0A1S4EM31|A0A1S4EM31_DIACI	S	DS(+79.97)SSYKPFGSKDETSTTTGSK	2	21	RING finger protein nhl-1-like OS=Diaphorina citri OX=121845 GN=LOC103518201 PE=4 SV=1	RING finger protein nhl-1-like	LOC103518201	29.15	2288.97	-3.6	768	788	S2:Phosphorylation (STY):0.00	S769	SSDSRDSSSYKPF	6739.88	5584.76	5086.79	5803.81	3433.45	530.752	1060.65	1674.95	3.46506	0.0153981
A0A1S4ERI5	A0A1S4ERI5|A0A1S4ERI5_DIACI:A0A3Q0IJI6|A0A3Q0IJI6_DIACI:A0A3Q0IQ26|A0A3Q0IQ26_DIACI:A0A3Q0IJS0|A0A3Q0IJS0_DIACI:A0A3Q0IP46|A0A3Q0IP46_DIACI	T	T(+79.97)PPEPHIK	1	8	Uncharacterized protein OS=Diaphorina citri OX=121845 GN=LOC108254290 PE=4 SV=1	Uncharacterized protein	LOC108254290	53.16	997.463	-4	52	59		T52	ISSGPKTPPEPHI	1574.7	1607.21	2159.98	1780.63	828.075	320.616	394.601	514.431	3.46136	0.00687706
A0A3Q0JIU3	A0A3Q0JIU3|A0A3Q0JIU3_DIACI:A0A1S4ENT0|A0A1S4ENT0_DIACI	S	SIS(+79.97)GDEESPLC(+57.02)DTISR	3	16	Repressor of RNA polymerase III transcription MAF1 homolog OS=Diaphorina citri OX=121845 GN=LOC103519940 PE=3 SV=1	Repressor of RNA polymerase III transcription MAF1 homolog	LOC103519940	58.07	1844.75	1.8	45	60	S3:Phosphorylation (STY):0.00;C11:Carbamidomethylation:1000.00	S47	HYSRSISGDEESP	3667.11	3330.3	4976.18	3991.2	1295.43	1416.25	771.781	1161.15	3.43727	0.00631808
A0A3Q0IRX6	A0A3Q0IRX6|A0A3Q0IRX6_DIACI	S	TFVTTS(+79.97)SVPGSQVYM(+15.99)VQETR	6	20	Paramyosin, long form OS=Diaphorina citri OX=121845 GN=LOC103508718 PE=4 SV=1	Paramyosin, long form	LOC103508718	27.54	2312.04	4.4	1326	1345	S6:Phosphorylation (STY):0.00;M15:Oxidation (M):1000.00	S1331	RTFVTTSSVPGSQ	957.122	914.794	1021.91	964.608	95.2971	552.446	196.157	281.3	3.42911	0.00859788
A0A1S3DFT6	A0A1S3DFT6|A0A1S3DFT6_DIACI	S	SDIS(+79.97)ADS(+79.97)IER	4	10	Epidermal growth factor receptor kinase substrate 8 OS=Diaphorina citri OX=121845 GN=LOC103517601 PE=3 SV=1	Epidermal growth factor receptor kinase substrate 8	LOC103517601	41.67	1251.44	-1.2	531	540	S4:Phosphorylation (STY):7.77;S7:Phosphorylation (STY):23.15	S534	SARSDISADSIER	8196.25	8206.4	5619.75	7340.8	4483.3	348.891	1621.98	2151.39	3.41212	0.0255561
A0A1S3DFT6	A0A1S3DFT6|A0A1S3DFT6_DIACI	S	SDIS(+79.97)ADS(+79.97)IER	7	10	Epidermal growth factor receptor kinase substrate 8 OS=Diaphorina citri OX=121845 GN=LOC103517601 PE=3 SV=1	Epidermal growth factor receptor kinase substrate 8	LOC103517601	41.67	1251.44	-1.2	531	540	S4:Phosphorylation (STY):7.77;S7:Phosphorylation (STY):23.15	S537	SDISADSIERNGG	8196.25	8206.4	5619.75	7340.8	4483.3	348.891	1621.98	2151.39	3.41212	0.0255561
A0A3Q0IQ10	A0A3Q0IQ10|A0A3Q0IQ10_DIACI	S	S(+79.97)VYAAEER	1	8	Muscle LIM protein 1 OS=Diaphorina citri OX=121845 GN=LOC103505787 PE=4 SV=1	Muscle LIM protein 1	LOC103505787	46.07	1003.4	-5.2	17	24	S1:Phosphorylation (STY):22.85	S17	CPACGKSVYAAEE	3460.54	5061.6	3170.43	3897.52	2032.13	556.815	845.255	1144.73	3.40474	0.0205953
A0A3Q0J3P5	A0A3Q0J3P5|A0A3Q0J3P5_DIACI	S	SIS(+79.97)PLSSR	3	8	Myosin light chain kinase, smooth muscle-like OS=Diaphorina citri OX=121845 GN=LOC113469527 PE=4 SV=1	Myosin light chain kinase, smooth muscle-like	LOC113469527	41.66	925.427	-4.4	18	25	S3:Phosphorylation (STY):14.04	S20	TPPRSISPLSSRT	4455.62	5881.44	5028.86	5121.97	3525.57	243.308	748.82	1505.9	3.40127	0.0303932
A0A1S3DU41	A0A1S3DU41|A0A1S3DU41_DIACI	S	S(+79.97)LHLSQPVAC(+57.02)PLEFDKPPVITDM(+15.99)RPVPVQHIVNPSGAK	1	38	Adhesive plaque matrix protein-like OS=Diaphorina citri OX=121845 GN=LOC103524757 PE=4 SV=1	Adhesive plaque matrix protein-like	LOC103524757	36.23	4269.15	8.3	673	710	S1:Phosphorylation (STY):11.12;C10:Carbamidomethylation:1000.00;M23:Oxidation (M):1000.00	S673	SAPKRRSLHLSQP	454.183	1020.77	937.628	804.192	267.715	130.556	324.824	241.031	3.33646	0.0387489
A0A3Q0J8D1	A0A3Q0J8D1|A0A3Q0J8D1_DIACI	Y	LEELHDYY(+79.97)GTSNERHSPR	8	18	Uncharacterized protein LOC103514447 OS=Diaphorina citri OX=121845 GN=LOC103514447 PE=4 SV=1	Uncharacterized protein LOC103514447	LOC103514447	24.38	2281.98	-2.2	465	482	Y8:Phosphorylation (STY):14.02	Y472	EELHDYYGTSNER	1105.37	758.393	1483.32	1115.7	334.48	590.405	85.5087	336.798	3.31265	0.0378957
A0A3Q0J321	A0A3Q0J321|A0A3Q0J321_DIACI	S	KVS(+79.97)LS(+79.97)SVSLR	3	10	LOW QUALITY PROTEIN: microtubule-actin cross-linking factor 1, isoforms 1/2/3/5 OS=Diaphorina citri OX=121845 GN=LOC103512109 PE=4 SV=1	LOW QUALITY PROTEIN: microtubule-actin cross-linking factor 1, isoforms 1/2/3/5	LOC103512109	29.17	1234.57	-2.7	5116	5125	S3:Phosphorylation (STY):0.00;S5:Phosphorylation (STY):0.00	S5118	NPPKKVSLSSVSL	2498.49	3238.88	1447.85	2395.07	797.55	260.323	1123.4	727.091	3.29404	0.0446015
A0A3Q0J321	A0A3Q0J321|A0A3Q0J321_DIACI	S	KVS(+79.97)LS(+79.97)SVSLR	5	10	LOW QUALITY PROTEIN: microtubule-actin cross-linking factor 1, isoforms 1/2/3/5 OS=Diaphorina citri OX=121845 GN=LOC103512109 PE=4 SV=1	LOW QUALITY PROTEIN: microtubule-actin cross-linking factor 1, isoforms 1/2/3/5	LOC103512109	29.17	1234.57	-2.7	5116	5125	S3:Phosphorylation (STY):0.00;S5:Phosphorylation (STY):0.00	S5120	PKKVSLSSVSLRR	2498.49	3238.88	1447.85	2395.07	797.55	260.323	1123.4	727.091	3.29404	0.0446015
A0A1S4ESJ8	A0A1S4ESJ8|A0A1S4ESJ8_DIACI	S	ASLQDS(+79.97)DSDNDL	6	12	Proteasome subunit alpha type OS=Diaphorina citri OX=121845 GN=LOC103524149 PE=3 SV=1	Proteasome subunit alpha type	LOC103524149	47.09	1358.49	0	242	253	S6:Phosphorylation (STY):12.81	S247	KASLQDSDSDNDL	6435.28	14544	10147.6	10375.6	3784.99	2914.11	2761.43	3153.51	3.29019	0.037896
A0A3Q0J9E1	A0A3Q0J9E1|A0A3Q0J9E1_DIACI	S	SSQLAPLDLDNVEDDTGSVRSDS(+79.97)S(+79.97)ELK	23	27	Uncharacterized protein LOC103517085 OS=Diaphorina citri OX=121845 GN=LOC103517085 PE=4 SV=1	Uncharacterized protein LOC103517085	LOC103517085	24.41	3036.28	3.7	217	243	S23:Phosphorylation (STY):0.00;S24:Phosphorylation (STY):0.00	S239	GSVRSDSSELKTI		1397.31	1133.76	1265.53	333.6	720.337	101.256	385.064	3.28655	0.0400305
A0A3Q0J9E1	A0A3Q0J9E1|A0A3Q0J9E1_DIACI	S	SSQLAPLDLDNVEDDTGSVRSDS(+79.97)S(+79.97)ELK	24	27	Uncharacterized protein LOC103517085 OS=Diaphorina citri OX=121845 GN=LOC103517085 PE=4 SV=1	Uncharacterized protein LOC103517085	LOC103517085	24.41	3036.28	3.7	217	243	S23:Phosphorylation (STY):0.00;S24:Phosphorylation (STY):0.00	S240	SVRSDSSELKTIP		1397.31	1133.76	1265.53	333.6	720.337	101.256	385.064	3.28655	0.0400305
A0A1S3DUS6	A0A1S3DUS6|A0A1S3DUS6_DIACI	S	TESTTQVVNS(+79.97)DEAAK	10	15	Titin-like OS=Diaphorina citri OX=121845 GN=LOC103524724 PE=4 SV=1	Titin-like	LOC103524724	58.42	1658.7	0.8	37	51	S10:Phosphorylation (STY):68.60	S46	TTQVVNSDEAAKE	5490.04	3342.77	3159.43	3997.41	1176.07	1049.87	1427.18	1217.71	3.28274	0.0212953
A0A3Q0IRS7	A0A3Q0IRS7|A0A3Q0IRS7_DIACI:A0A1S3CVP9|A0A1S3CVP9_DIACI:A0A3Q0ILA9|A0A3Q0ILA9_DIACI:Q0PWU1|Q0PWU1_DIACI:A0A3Q0IXA2|A0A3Q0IXA2_DIACI	T	GYSFTT(+79.97)TAER	6	10	Actin-85C-like OS=Diaphorina citri OX=121845 GN=LOC103508595 PE=4 SV=1	Actin-85C-like	LOC103508595	48.42	1211.49	-4.9	79	88	T6:Phosphorylation (STY):0.00	T84	RGYSFTTTAEREI	2502.74	2823.5	2525.5	2617.25	935.448	646.338	810.285	797.357	3.2824	0.000165156
A0A3Q0JK34	A0A3Q0JK34|A0A3Q0JK34_DIACI	S	S(+79.97)S(+79.97)PDYSVPVPK	1	11	LOW QUALITY PROTEIN: uncharacterized protein LOC103520694 OS=Diaphorina citri OX=121845 GN=LOC103520694 PE=4 SV=1	LOW QUALITY PROTEIN: uncharacterized protein LOC103520694	LOC103520694	57.2	1334.52	-2.2	1915	1925	S1:Phosphorylation (STY):33.81;S2:Phosphorylation (STY):38.16	S1915	RPSRRRSSPDYSV	947.99	1037.39	996.765	994.048	211.868	604.958	99.4281	305.418	3.25471	0.0114128
A0A3Q0JK34	A0A3Q0JK34|A0A3Q0JK34_DIACI	S	S(+79.97)S(+79.97)PDYSVPVPK	2	11	LOW QUALITY PROTEIN: uncharacterized protein LOC103520694 OS=Diaphorina citri OX=121845 GN=LOC103520694 PE=4 SV=1	LOW QUALITY PROTEIN: uncharacterized protein LOC103520694	LOC103520694	57.2	1334.52	-2.2	1915	1925	S1:Phosphorylation (STY):33.81;S2:Phosphorylation (STY):38.16	S1916	PSRRRSSPDYSVP	947.99	1037.39	996.765	994.048	211.868	604.958	99.4281	305.418	3.25471	0.0114128
A0A3Q0IQW1	A0A3Q0IQW1|A0A3Q0IQW1_DIACI	T	FST(+79.97)DSLDGLSR	3	11	Uncharacterized protein LOC108251946 OS=Diaphorina citri OX=121845 GN=LOC108251946 PE=4 SV=1	Uncharacterized protein LOC108251946	LOC108251946	46.82	1276.53	-6.2	170	180	T3:Phosphorylation (STY):0.00	T172	NRRRFSTDSLDGL	7821.41	5772.26	3991.86	5861.84	3324.37	1036.17	1085.36	1815.3	3.22913	0.0391075
A0A1S3D8K4	A0A1S3D8K4|A0A1S3D8K4_DIACI	S	NIDQLDEIEEENVTVIEPTC(+57.02)MS(+79.97)PIK	22	25	Importin subunit alpha OS=Diaphorina citri OX=121845 GN=LOC103521915 PE=3 SV=1	Importin subunit alpha	LOC103521915	38.85	2995.34	2	49	73	C20:Carbamidomethylation:1000.00;S22:Phosphorylation (STY):0.00	S70	IEPTCMSPIKMTV	518.786	404.913	356.46	426.72	212.43	52.0759		132.253	3.22654	0.041954
A0A3Q0IL42	A0A3Q0IL42|A0A3Q0IL42_DIACI	S	DNMS(+79.97)DTELSDHADHEELK	4	18	Ankyrin-3-like OS=Diaphorina citri OX=121845 GN=LOC103505993 PE=4 SV=1	Ankyrin-3-like	LOC103505993	41.33	2164.83	-2.6	1541	1558	S4:Phosphorylation (STY):0.00	S1544	NIKDNMSDTELSD	1839.07	2773.06	2154.55	2255.56	911.39	945.536	249.751	702.226	3.21202	0.0119971
A0A1S4EMX3	A0A1S4EMX3|A0A1S4EMX3_DIACI	S	QLDEYGPLAS(+79.97)HS(+79.97)DK	10	14	Uncharacterized protein LOC103519020 OS=Diaphorina citri OX=121845 GN=LOC103519020 PE=4 SV=1	Uncharacterized protein LOC103519020	LOC103519020	41.1	1718.66	-1.7	189	202	S10:Phosphorylation (STY):0.00;S12:Phosphorylation (STY):0.00	S198	EYGPLASHSDKLG	4331.89	2550.81	3227.28	3369.99	2020.12	940.082	189.278	1049.83	3.21004	0.0354091
A0A1S4EMX3	A0A1S4EMX3|A0A1S4EMX3_DIACI	S	QLDEYGPLAS(+79.97)HS(+79.97)DK	12	14	Uncharacterized protein LOC103519020 OS=Diaphorina citri OX=121845 GN=LOC103519020 PE=4 SV=1	Uncharacterized protein LOC103519020	LOC103519020	41.1	1718.66	-1.7	189	202	S10:Phosphorylation (STY):0.00;S12:Phosphorylation (STY):0.00	S200	GPLASHSDKLGDR	4331.89	2550.81	3227.28	3369.99	2020.12	940.082	189.278	1049.83	3.21004	0.0354091
A0A1S4E9R1	A0A1S4E9R1|A0A1S4E9R1_DIACI	T	GNEEPIT(+79.97)PETK	7	11	Annexin OS=Diaphorina citri OX=121845 GN=LOC103507710 PE=3 SV=1	Annexin	LOC103507710	58.89	1293.55	-1.7	291	301	T7:Phosphorylation (STY):18.00	T297	GNEEPITPETK__	47536.9	45424.8	30343	41101.6	16507.1	5939.86	16198.3	12881.7	3.19068	0.0118031
A0A1S4EBZ0	A0A1S4EBZ0|A0A1S4EBZ0_DIACI	S	ENESLNGNC(+57.02)ATSTPSGTAHTANLIS(+79.97)PER	25	28	Transforming acidic coiled-coil-containing protein 3 OS=Diaphorina citri OX=121845 GN=LOC103509623 PE=3 SV=2	Transforming acidic coiled-coil-containing protein 3	LOC103509623	40.85	3007.3	-0.6	924	951	C9:Carbamidomethylation:1000.00;S25:Phosphorylation (STY):7.38	S948	HTANLISPERNST	1857.93	2062.27	2568.55	2162.92	746.388	533.247	754.215	677.95	3.19038	0.002654
A0A3Q0IRS7	A0A3Q0IRS7|A0A3Q0IRS7_DIACI:A0A1S3CVP9|A0A1S3CVP9_DIACI:A0A3Q0ILA9|A0A3Q0ILA9_DIACI:Q0PWU1|Q0PWU1_DIACI:A0A3Q0IXA2|A0A3Q0IXA2_DIACI	T	GYSFTTT(+79.97)AER	7	10	Actin-85C-like OS=Diaphorina citri OX=121845 GN=LOC103508595 PE=4 SV=1	Actin-85C-like	LOC103508595	50.35	1211.49	-4.3	79	88	T7:Phosphorylation (STY):17.01	T85	GYSFTTTAEREIV	2502.74	2823.5	2525.5	2617.25	935.448	716.448	810.285	820.727	3.18894	0.000120813
A0A3Q0IPA2	A0A3Q0IPA2|A0A3Q0IPA2_DIACI	S	RPEDDDMQIGS(+79.97)DEENDYYNAR	11	21	Splicing factor 3A subunit 1 OS=Diaphorina citri OX=121845 GN=LOC103504913 PE=4 SV=1	Splicing factor 3A subunit 1	LOC103504913	69.44	2610.98	-0.9	313	333	S11:Phosphorylation (STY):37.35	S323	DDMQIGSDEENDY	3028.74	4305.27	3832.63	3722.21	1826.56	981.124	695.108	1167.6	3.18793	0.007147
A0A3Q0IWI8	A0A3Q0IWI8|A0A3Q0IWI8_DIACI	S	RPS(+79.97)ES(+79.97)S(+79.97)SESEPTSVQR	3	16	LOW QUALITY PROTEIN: spectrin beta chain, non-erythrocytic 1-like OS=Diaphorina citri OX=121845 GN=LOC103510935 PE=3 SV=1	LOW QUALITY PROTEIN: spectrin beta chain, non-erythrocytic 1-like	LOC103510935	29.21	2001.71	1	3859	3874	S3:Phosphorylation (STY):6.65;S5:Phosphorylation (STY):0.00;S6:Phosphorylation (STY):0.00	S3861	NSTRRPSESSSES	1368.28	921.873	742.562	1010.9	411.258	346.903	194.018	317.393	3.18502	0.0243919
A0A3Q0IWI8	A0A3Q0IWI8|A0A3Q0IWI8_DIACI	S	RPS(+79.97)ES(+79.97)S(+79.97)SESEPTSVQR	5	16	LOW QUALITY PROTEIN: spectrin beta chain, non-erythrocytic 1-like OS=Diaphorina citri OX=121845 GN=LOC103510935 PE=3 SV=1	LOW QUALITY PROTEIN: spectrin beta chain, non-erythrocytic 1-like	LOC103510935	29.21	2001.71	1	3859	3874	S3:Phosphorylation (STY):6.65;S5:Phosphorylation (STY):0.00;S6:Phosphorylation (STY):0.00	S3863	TRRPSESSSESEP	1368.28	921.873	742.562	1010.9	411.258	346.903	194.018	317.393	3.18502	0.0243919
A0A3Q0IWI8	A0A3Q0IWI8|A0A3Q0IWI8_DIACI	S	RPS(+79.97)ES(+79.97)S(+79.97)SESEPTSVQR	6	16	LOW QUALITY PROTEIN: spectrin beta chain, non-erythrocytic 1-like OS=Diaphorina citri OX=121845 GN=LOC103510935 PE=3 SV=1	LOW QUALITY PROTEIN: spectrin beta chain, non-erythrocytic 1-like	LOC103510935	29.21	2001.71	1	3859	3874	S3:Phosphorylation (STY):6.65;S5:Phosphorylation (STY):0.00;S6:Phosphorylation (STY):0.00	S3864	RRPSESSSESEPT	1368.28	921.873	742.562	1010.9	411.258	346.903	194.018	317.393	3.18502	0.0243919
A0A1S3CWU7	A0A1S3CWU7|A0A1S3CWU7_DIACI	S	QS(+79.97)TPEDEGFEEVSK	2	14	ADP-ribosylation factor-like protein 3 OS=Diaphorina citri OX=121845 GN=LOC103506065 PE=3 SV=1	ADP-ribosylation factor-like protein 3	LOC103506065	48.44	1660.65	1.8	33	46	S2:Phosphorylation (STY):33.98	S34	WKKRRQSTPEDEG	1224.21	631.922	673.847	843.326	251.6	252.618	293.1	265.773	3.17311	0.0392071
A0A1S3D013	A0A1S3D013|A0A1S3D013_DIACI:A0A1S3CVP9|A0A1S3CVP9_DIACI:A0A3Q0ILA9|A0A3Q0ILA9_DIACI	S	DS(+79.97)YVGDEAQSK	2	11	Actin-1 OS=Diaphorina citri OX=121845 GN=LOC103508596 PE=3 SV=1	Actin-1	LOC103508596	61.56	1277.48	-1.1	52	62	S2:Phosphorylation (STY):17.01	S53	GMGQKDSYVGDEA	8238.81	8047.19	5392.67	7226.22	930.096	991.456	4913.43	2278.33	3.17172	0.0369118
A0A3Q0JK34	A0A3Q0JK34|A0A3Q0JK34_DIACI	S	SLGTS(+79.97)LTS(+79.97)EDR	5	11	LOW QUALITY PROTEIN: uncharacterized protein LOC103520694 OS=Diaphorina citri OX=121845 GN=LOC103520694 PE=4 SV=1	LOW QUALITY PROTEIN: uncharacterized protein LOC103520694	LOC103520694	28.4	1324.49	1.8	187	197	S5:Phosphorylation (STY):0.00;S8:Phosphorylation (STY):14.02	S191	SRSLGTSLTSEDR	917.344	993.159	1022.73	977.743	202.942	129.5	594.052	308.831	3.16594	0.0105504
A0A3Q0JK34	A0A3Q0JK34|A0A3Q0JK34_DIACI	S	SLGTS(+79.97)LTS(+79.97)EDR	8	11	LOW QUALITY PROTEIN: uncharacterized protein LOC103520694 OS=Diaphorina citri OX=121845 GN=LOC103520694 PE=4 SV=1	LOW QUALITY PROTEIN: uncharacterized protein LOC103520694	LOC103520694	28.4	1324.49	1.8	187	197	S5:Phosphorylation (STY):0.00;S8:Phosphorylation (STY):14.02	S194	LGTSLTSEDRTSR	917.344	993.159	1022.73	977.743	202.942	129.5	594.052	308.831	3.16594	0.0105504
A0A1S3DNK9	A0A1S3DNK9|A0A1S3DNK9_DIACI	T	EVT(+79.97)PLKQDATEQR	3	13	Ubiquitin carboxyl-terminal hydrolase OS=Diaphorina citri OX=121845 GN=LOC103521783 PE=3 SV=1	Ubiquitin carboxyl-terminal hydrolase	LOC103521783	32.06	1593.74	-1.4	640	652	T3:Phosphorylation (STY):32.83	T642	EYHKEVTPLKQDA	4707.45	2371.2	2930.9	3336.52	1338.84	519.27	1329.21	1062.44	3.14042	0.0394425
A0A3Q0J083	A0A3Q0J083|A0A3Q0J083_DIACI	S	KPVSFSGDTHS(+79.97)EEQPLQAPLR	11	21	alpha-1,2-Mannosidase OS=Diaphorina citri OX=121845 GN=LOC103512631 PE=3 SV=1	alpha-1,2-Mannosidase	LOC103512631	32.91	2402.13	-3.4	77	97	S11:Phosphorylation (STY):1.95	S87	FSGDTHSEEQPLQ	2716.17	2226.68	3216.3	2719.72	1339.9	166.661	1096.69	867.748	3.13422	0.0155157
A0A3Q0INY9	A0A3Q0INY9|A0A3Q0INY9_DIACI	T	VDEDEAEPEDLGT(+79.97)PDRPEPEAALPAPAEK	13	29	Proteoglycan 4-like OS=Diaphorina citri OX=121845 GN=LOC103524980 PE=4 SV=1	Proteoglycan 4-like	LOC103524980	71.5	3166.39	0.6	291	319		T303	EPEDLGTPDRPEP	16377.4	13698.2	9987.8	13354.5	6949.82	2516.64	3340.22	4268.89	3.12832	0.0167891
A0A1S3CY74	A0A1S3CY74|A0A1S3CY74_DIACI:A0A1S3DRL8|A0A1S3DRL8_DIACI	S	DKVDSNFTGS(+79.97)VK	10	12	Choline transporter-like protein 3 OS=Diaphorina citri OX=121845 GN=LOC103506813 PE=4 SV=1	Choline transporter-like protein 3	LOC103506813	41.51	1375.6	-2.9	16	27	S10:Phosphorylation (STY):14.63	S25	DSNFTGSVKSRSC	638.246	479.355	480.108	532.57	189.688	93.0154	231.061	171.255	3.10981	0.00566468
A0A1S4EG57	A0A1S4EG57|A0A1S4EG57_DIACI:A0A3Q0J0T6|A0A3Q0J0T6_DIACI:A0A3Q0IQW5|A0A3Q0IQW5_DIACI	S	NVPTEERS(+79.97)EEISLSK	8	15	Uncharacterized protein DDB_G0283697 isoform X2 OS=Diaphorina citri OX=121845 GN=LOC103512962 PE=4 SV=1	Uncharacterized protein DDB_G0283697 isoform X2	LOC103512962	46.31	1796.82	-2.3	225	239	S8:Phosphorylation (STY):0.00	S232	VPTEERSEEISLS	44800.3	27965.2	28775.4	33847	21250.5	10068.3	1495.97	10938.3	3.09437	0.0444829
A0A3Q0IPG6	A0A3Q0IPG6|A0A3Q0IPG6_DIACI	S	RNS(+79.97)VLAALR	3	9	Tyrosine-protein phosphatase non-receptor type 23 OS=Diaphorina citri OX=121845 GN=LOC103507481 PE=4 SV=1	Tyrosine-protein phosphatase non-receptor type 23	LOC103507481	41.35	1078.56	-1.6	667	675		S669	VVHRRNSVLAALR	2066.69	2555.19	2148.23	2256.7	768.014	836.63	585.443	730.029	3.09125	0.000825466
A0A3Q0J2I1	A0A3Q0J2I1|A0A3Q0J2I1_DIACI	S	TAPVSAVS(+79.97)SPGDESR	8	15	Uncharacterized protein LOC113468315 OS=Diaphorina citri OX=121845 GN=LOC113468315 PE=4 SV=1	Uncharacterized protein LOC113468315	LOC113468315	24.67	1538.66	-2.3	32	46	S8:Phosphorylation (STY):0.00	S39	APVSAVSSPGDES	1974.18	2129.98	2193.01	2099.05	891.152	1026.02	120.422	679.199	3.09049	0.00801678
A0A3Q0IJE5	A0A3Q0IJE5|A0A3Q0IJE5_DIACI	S	LLS(+79.97)EDEPR	3	8	Pollen-specific leucine-rich repeat extensin-like protein 2 OS=Diaphorina citri OX=121845 GN=LOC103505110 PE=4 SV=1	Pollen-specific leucine-rich repeat extensin-like protein 2	LOC103505110	54.85	1037.44	2.6	49	56		S51	AVLRLLSEDEPRL	66613.6	39226.3	46061.3	50633.7	26385	1515.28	21370.1	16423.4	3.08302	0.0378396
A0A3Q0ISB8	A0A3Q0ISB8|A0A3Q0ISB8_DIACI	S	GVISAPPALEEDNS(+79.97)QDSGVVGLGK	14	24	Uncharacterized protein C4G9.04c-like OS=Diaphorina citri OX=121845 GN=LOC103508905 PE=4 SV=1	Uncharacterized protein C4G9.04c-like	LOC103508905	40.1	2418.13	1.8	21	44	S14:Phosphorylation (STY):19.05	S34	ALEEDNSQDSGVV	2047.64	2998.26	2382.04	2475.98	157.555	1024.64	1245.19	809.126	3.06007	0.018344
A0A1S3CUN8	A0A1S3CUN8|A0A1S3CUN8_DIACI:A0A1S4EAT7|A0A1S4EAT7_DIACI	S	FDS(+79.97)SLGSTYR	3	10	Annexin OS=Diaphorina citri OX=121845 GN=LOC103505600 PE=3 SV=1	Annexin	LOC103505600	66.41	1211.49	-3.6	9	18	S3:Phosphorylation (STY):30.46	S11	QYCRFDSSLGSTY	5309.5	5583.43	4905.04	5265.99	3964.93	304.239	901.018	1723.4	3.05559	0.0370018
A0A3Q0IQ70	A0A3Q0IQ70|A0A3Q0IQ70_DIACI	S	KNS(+79.97)LEDFTHEELMAR	3	15	Uncharacterized protein LOC103507893 OS=Diaphorina citri OX=121845 GN=LOC103507893 PE=4 SV=1	Uncharacterized protein LOC103507893	LOC103507893	42.67	1898.82	-1.8	533	547	S3:Phosphorylation (STY):6.47	S535	ILGRKNSLEDFTH	419.064	871.079	970.83	753.658	180.243	256.464	303.307	246.671	3.05531	0.0431549
A0A1S3DHN3	A0A1S3DHN3|A0A1S3DHN3_DIACI	S	KSS(+79.97)LVPDDINAK	3	12	Conserved oligomeric Golgi complex subunit 3 OS=Diaphorina citri OX=121845 GN=LOC103517909 PE=3 SV=2	Conserved oligomeric Golgi complex subunit 3	LOC103517909	30.56	1365.65	-3.1	58	69	S3:Phosphorylation (STY):0.00	S60	EEKKKSSLVPDDI	5047.16	3487.25	2182.48	3572.3	1078.21	1200.93	1231.15	1170.1	3.05299	0.0442772
A0A3Q0JF78	A0A3Q0JF78|A0A3Q0JF78_DIACI	S	YSVS(+79.97)PSSR	4	8	Nuclear cap-binding protein subunit 3 OS=Diaphorina citri OX=121845 GN=LOC103517429 PE=3 SV=1	Nuclear cap-binding protein subunit 3	LOC103517429	38.23	961.391	-0.7	816	823	S4:Phosphorylation (STY):25.66	S819	FSRYSVSPSSRHY	1631.18	1494.5	1611.34	1579.01	367.681		669.024	518.353	3.04621	0.0034425
A0A3Q0J085	A0A3Q0J085|A0A3Q0J085_DIACI	S	LFHDESS(+79.97)ASLNKDHVEVK	7	18	alpha-glucosidase OS=Diaphorina citri OX=121845 GN=LOC103512673 PE=4 SV=1	alpha-glucosidase	LOC103512673	54.14	2133.97	-0.7	11	28	S7:Phosphorylation (STY):0.00	S17	LFHDESSASLNKD	31367.4	22465.2	15300.8	23044.4	12576.4	2721.83	7415.57	7571.27	3.04367	0.0468906
A0A1S3D7T9	A0A1S3D7T9|A0A1S3D7T9_DIACI	S	SFIANTS(+79.97)PTLPR	7	12	non-specific serine/threonine protein kinase OS=Diaphorina citri OX=121845 GN=LOC103513211 PE=3 SV=2	non-specific serine/threonine protein kinase	LOC103513211	57.9	1382.66	3.8	82	93	S7:Phosphorylation (STY):14.04	S88	SFIANTSPTLPRC	846.458	1498.14	1181.83	1175.47	385.474	254.041	524.556	388.024	3.02939	0.0180638
A0A3Q0J6A5	A0A3Q0J6A5|A0A3Q0J6A5_DIACI	S	NDAGAESTHS(+79.97)GGAGASTGGVGGEAADVLK	10	29	LOW QUALITY PROTEIN: dmX-like protein 1 OS=Diaphorina citri OX=121845 GN=LOC103513612 PE=4 SV=1	LOW QUALITY PROTEIN: dmX-like protein 1	LOC103513612	92.11	2622.12	-1.6	300	328	S10:Phosphorylation (STY):4.52	S309	GAESTHSGGAGAS	3739.03	3062.13	2289.73	3030.3	1121.17	1555.71	333.846	1003.58	3.01949	0.0211871
A0A3Q0JK34	A0A3Q0JK34|A0A3Q0JK34_DIACI	S	DDS(+79.97)DSALDLGR	3	11	LOW QUALITY PROTEIN: uncharacterized protein LOC103520694 OS=Diaphorina citri OX=121845 GN=LOC103520694 PE=4 SV=1	LOW QUALITY PROTEIN: uncharacterized protein LOC103520694	LOC103520694	72.85	1242.48	-12.9	1967	1977	S3:Phosphorylation (STY):28.86	S1969	SSTRDDSDSALDL	18927.8	17470.8	12368.5	16255.7	8481.23	342.025	7429.27	5417.51	3.00058	0.0286529
A0A3Q0JD23	A0A3Q0JD23|A0A3Q0JD23_DIACI	S	SGS(+79.97)VPIDEK	3	9	Titin OS=Diaphorina citri OX=121845 GN=LOC103518851 PE=4 SV=1	Titin	LOC103518851	51.25	1010.43	4.1	2501	2509	S3:Phosphorylation (STY):7.32	S2503	PSSKSGSVPIDEK	568.947	861.888	834.878	755.237	229.518		274.288	251.903	2.99813	0.0257207
A0A1S3DFT6	A0A1S3DFT6|A0A1S3DFT6_DIACI	S	SDIS(+79.97)ADSIER	4	10	Epidermal growth factor receptor kinase substrate 8 OS=Diaphorina citri OX=121845 GN=LOC103517601 PE=3 SV=1	Epidermal growth factor receptor kinase substrate 8	LOC103517601	51.99	1171.48	0.8	531	540	S4:Phosphorylation (STY):28.36	S534	SARSDISADSIER	1433.44	2053.09	1381.28	1622.6	930.036	328.036	365.815	541.296	2.99763	0.0204603
A0A3Q0IZ57	A0A3Q0IZ57|A0A3Q0IZ57_DIACI	S	SKS(+79.97)PHM(+15.99)NNEEPINLAHFPAAKPPLNNEVPK	3	30	LOW QUALITY PROTEIN: actin-binding LIM protein 1 OS=Diaphorina citri OX=121845 GN=LOC103512164 PE=4 SV=1	LOW QUALITY PROTEIN: actin-binding LIM protein 1	LOC103512164	38.35	3415.64	0.5	295	324	S3:Phosphorylation (STY):0.00;M6:Oxidation (M):1000.00	S297	ETPRSKSPHMNNE	9096.5	10766.6	10658.5	10173.9	4580.25	734.953	4873.94	3396.38	2.9955	0.00922835
A0A3Q0J083	A0A3Q0J083|A0A3Q0J083_DIACI	T	KPVSFSGDT(+79.97)HSEEQPLQAPLR	9	21	alpha-1,2-Mannosidase OS=Diaphorina citri OX=121845 GN=LOC103512631 PE=3 SV=1	alpha-1,2-Mannosidase	LOC103512631	52.4	2402.13	-3.6	77	97	T9:Phosphorylation (STY):0.00	T85	VSFSGDTHSEEQP	2999.05	2226.68	3216.3	2814.01	796.4	930.001	1096.69	941.029	2.99035	0.00390234
A0A3Q0JAC5	A0A3Q0JAC5|A0A3Q0JAC5_DIACI:A0A1S3DPD4|A0A1S3DPD4_DIACI	T	ATITGT(+79.97)GASPTSK	6	13	Protein lingerer OS=Diaphorina citri OX=121845 GN=LOC103517494 PE=4 SV=1	Protein lingerer	LOC103517494	49.36	1270.58	2	153	165	T6:Phosphorylation (STY):0.00	T158	RATITGTGASPTS	2960.06	2362.78	1972.62	2431.82	112.821	980.643	1354.83	816.097	2.97982	0.0257613
A0A1S3D095	A0A1S3D095|A0A1S3D095_DIACI	S	S(+79.97)AINETESTNSS(+79.97)TLGIDMTK	1	20	Facilitated trehalose transporter Tret1-like OS=Diaphorina citri OX=121845 GN=LOC103508605 PE=3 SV=1	Facilitated trehalose transporter Tret1-like	LOC103508605	27.31	2257.91	9.9	480	499	S1:Phosphorylation (STY):0.00;S12:Phosphorylation (STY):0.00	S480	TPDTKKSAINETE	462.19	211.757	387.821	353.923	71.9022	143.124	141.663	118.896	2.97673	0.0392545
A0A1S3D095	A0A1S3D095|A0A1S3D095_DIACI	S	S(+79.97)AINETESTNSS(+79.97)TLGIDMTK	12	20	Facilitated trehalose transporter Tret1-like OS=Diaphorina citri OX=121845 GN=LOC103508605 PE=3 SV=1	Facilitated trehalose transporter Tret1-like	LOC103508605	27.31	2257.91	9.9	480	499	S1:Phosphorylation (STY):0.00;S12:Phosphorylation (STY):0.00	S491	TESTNSSTLGIDM	462.19	211.757	387.821	353.923	71.9022	143.124	141.663	118.896	2.97673	0.0392545
A0A1S3CUJ7	A0A1S3CUJ7|A0A1S3CUJ7_DIACI	S	GS(+79.97)GGAGDFDQFK	2	12	Heterogeneous nuclear ribonucleoprotein C-like OS=Diaphorina citri OX=121845 GN=LOC103505555 PE=4 SV=1	Heterogeneous nuclear ribonucleoprotein C-like	LOC103505555	51.64	1264.48	-4	2	13		S3	____MGSGGAGDF	1219.19	854.091	1385.41	1152.9	831.828	208.838	122.887	387.851	2.97252	0.0486841
A0A3Q0J0V5	A0A3Q0J0V5|A0A3Q0J0V5_DIACI	S	DTDS(+79.97)ILEQDVK	4	11	Protein PIF-like OS=Diaphorina citri OX=121845 GN=LOC113467983 PE=4 SV=1	Protein PIF-like	LOC113467983	53.04	1341.57	3.5	518	528	S4:Phosphorylation (STY):5.99	S521	EIKDTDSILEQDV	505.859	328.042	538.121	457.341	95.2541	164.231	202.088	153.858	2.97249	0.0137983
A0A1S4EK95	A0A1S4EK95|A0A1S4EK95_DIACI:A0A3Q0IVR6|A0A3Q0IVR6_DIACI	T	YQVDT(+79.97)DELY(+79.97)QEAVQAK	5	16	Uncharacterized protein LOC108253311 OS=Diaphorina citri OX=121845 GN=LOC108253311 PE=4 SV=1	Uncharacterized protein LOC108253311	LOC108253311	48.32	2058.82	-5.4	68	83	T5:Phosphorylation (STY):33.81;Y9:Phosphorylation (STY):32.94	T72	GKYQVDTDELYQE	1376.83	978.103	886.467	1080.47	255.159	513.099	324.26	364.173	2.96691	0.0133114
A0A1S4EK95	A0A1S4EK95|A0A1S4EK95_DIACI:A0A3Q0IVR6|A0A3Q0IVR6_DIACI	Y	YQVDT(+79.97)DELY(+79.97)QEAVQAK	9	16	Uncharacterized protein LOC108253311 OS=Diaphorina citri OX=121845 GN=LOC108253311 PE=4 SV=1	Uncharacterized protein LOC108253311	LOC108253311	48.32	2058.82	-5.4	68	83	T5:Phosphorylation (STY):33.81;Y9:Phosphorylation (STY):32.94	Y76	VDTDELYQEAVQA	1376.83	978.103	886.467	1080.47	255.159	513.099	324.26	364.173	2.96691	0.0133114
A0A3Q0IZK0	A0A3Q0IZK0|A0A3Q0IZK0_DIACI	S	DLIS(+79.97)IEEEDYR	4	11	LOW QUALITY PROTEIN: twitchin-like OS=Diaphorina citri OX=121845 GN=LOC103512392 PE=4 SV=1	LOW QUALITY PROTEIN: twitchin-like	LOC103512392	63.04	1460.61	0.6	2780	2790	S4:Phosphorylation (STY):71.75	S2783	EAKDLISIEEEDY	1251.25	1251.32	1000.74	1167.77	343.468	283.35	560.918	395.912	2.94957	0.00288309
A0A3Q0JAI0	A0A3Q0JAI0|A0A3Q0JAI0_DIACI	S	A(+42.01)NTSAAGGDS(+79.97)PK	10	12	Bifunctional 3'-phosphoadenosine 5'-phosphosulfate synthase-like OS=Diaphorina citri OX=121845 GN=LOC103517628 PE=4 SV=1	Bifunctional 3'-phosphoadenosine 5'-phosphosulfate synthase-like	LOC103517628	49.58	1196.47	2.1	2	13	A1:Acetylation (Protein N-term):1000.00;S10:Phosphorylation (STY):55.13	S11	SAAGGDSPKAKDV	153967	135814	106180	131987	223.797	50752.4	83665.3	44880.5	2.94085	0.0357555
A0A1S3DQ52	A0A1S3DQ52|A0A1S3DQ52_DIACI	S	S(+79.97)QDSQVSTLQK	1	11	Uncharacterized protein LOC103522751 OS=Diaphorina citri OX=121845 GN=LOC103522751 PE=4 SV=2	Uncharacterized protein LOC103522751	LOC103522751	50.11	1299.57	-1.7	95	105	S1:Phosphorylation (STY):29.32	S95	QVKRKRSQDSQVS	585.673	596.685	597.979	593.446	199.597	163.651	243.792	202.347	2.93282	7.63947e-05
A0A3Q0ISH0	A0A3Q0ISH0|A0A3Q0ISH0_DIACI	S	DTRPS(+79.97)PR	5	7	YLP motif-containing protein 1-like OS=Diaphorina citri OX=121845 GN=LOC103506544 PE=4 SV=1	YLP motif-containing protein 1-like	LOC103506544	28.81	907.391	-4.2	908	914	S5:Phosphorylation (STY):19.27	S912	GRDTRPSPRHDSN		392.568	394.669	393.619	129.663		138.924	134.293	2.93104	0.000335086
A0A3Q0J267	A0A3Q0J267|A0A3Q0J267_DIACI	S	S(+79.97)SEDNFEDEVER	1	12	LOW QUALITY PROTEIN: transcription factor 25 OS=Diaphorina citri OX=121845 GN=LOC103511167 PE=3 SV=1	LOW QUALITY PROTEIN: transcription factor 25	LOC103511167	63.87	1534.55	1.1	107	118	S1:Phosphorylation (STY):0.00	S107	KAQNPRSSEDNFE	7097.75	4522.7	6272.58	5964.35	2260.35	553.039	3292.58	2035.33	2.93041	0.0234734
A0A1S3D1R2	A0A1S3D1R2|A0A1S3D1R2_DIACI	S	SAS(+79.97)GDEAPEGLTK	3	13	Protein kinase C-binding protein 1-like OS=Diaphorina citri OX=121845 GN=LOC103508756 PE=4 SV=1	Protein kinase C-binding protein 1-like	LOC103508756	30.01	1340.55	-10.8	1108	1120	S3:Phosphorylation (STY):0.00	S1110	AEEKSASGDEAPE	389.692	546.271	376.003	437.322	127.652	153.551	167.642	149.615	2.92299	0.00674162
A0A3Q0JG04	A0A3Q0JG04|A0A3Q0JG04_DIACI	S	ISQTIEPSKPPAAEPSQTTSES(+79.97)TEK	22	25	Uncharacterized protein LOC103518349 OS=Diaphorina citri OX=121845 GN=LOC103518349 PE=4 SV=1	Uncharacterized protein LOC103518349	LOC103518349	42.27	2722.26	-0.9	370	394	S22:Phosphorylation (STY):0.00	S391	SQTTSESTEKKES	744.748	806.125	705.285	752.053	243.908	193.746	334.42	257.358	2.9222	0.000610893
A0A1S4END7	A0A1S4END7|A0A1S4END7_DIACI:A0A3Q0IV70|A0A3Q0IV70_DIACI	S	TTNVVSPGS(+79.97)GPR	9	12	Uncharacterized protein LOC108253725 OS=Diaphorina citri OX=121845 GN=LOC108253725 PE=4 SV=1	Uncharacterized protein LOC108253725	LOC108253725	56.73	1250.57	0.3	93	104	S9:Phosphorylation (STY):0.00	S101	NVVSPGSGPRSPV	13788.9	8556.07	6670.98	9671.99	3449.85	2403.42	4085.64	3312.97	2.91943	0.0436606
A0A3Q0IRV1	A0A3Q0IRV1|A0A3Q0IRV1_DIACI	S	S(+79.97)T(+79.97)SDLEMNNQK	1	11	Uncharacterized protein LOC103506515 OS=Diaphorina citri OX=121845 GN=LOC103506515 PE=4 SV=1	Uncharacterized protein LOC103506515	LOC103506515	49.06	1425.49	0.6	391	401	S1:Phosphorylation (STY):9.40;T2:Phosphorylation (STY):12.28	S391	STNFLRSTSDLEM	5921.6	4673.29	3293.71	4629.53	186.726	2430.3	2141.68	1586.23	2.91857	0.0424504
A0A3Q0IRV1	A0A3Q0IRV1|A0A3Q0IRV1_DIACI	T	S(+79.97)T(+79.97)SDLEMNNQK	2	11	Uncharacterized protein LOC103506515 OS=Diaphorina citri OX=121845 GN=LOC103506515 PE=4 SV=1	Uncharacterized protein LOC103506515	LOC103506515	49.06	1425.49	0.6	391	401	S1:Phosphorylation (STY):9.40;T2:Phosphorylation (STY):12.28	T392	TNFLRSTSDLEMN	5921.6	4673.29	3293.71	4629.53	186.726	2430.3	2141.68	1586.23	2.91857	0.0424504
A0A3Q0JD23	A0A3Q0JD23|A0A3Q0JD23_DIACI	S	DKPSS(+79.97)LDDDITEPDKVDLK	5	19	Titin OS=Diaphorina citri OX=121845 GN=LOC103518851 PE=4 SV=1	Titin	LOC103518851	52.29	2209	-6.3	2541	2559	S5:Phosphorylation (STY):7.21	S2545	KKDKPSSLDDDIT	31065	27212.9	27537.5	28605.1	12409.7	11069.2	6068.61	9849.15	2.90432	0.0012106
A0A3Q0IQ73	A0A3Q0IQ73|A0A3Q0IQ73_DIACI	T	TKT(+79.97)PDIPGVTEDEIAHK	3	17	Uncharacterized protein LOC103505336 OS=Diaphorina citri OX=121845 GN=LOC103505336 PE=4 SV=1	Uncharacterized protein LOC103505336	LOC103505336	36.51	1929.91	-9.3	1547	1563	T3:Phosphorylation (STY):11.10	T1549	VVHKTKTPDIPGV	1417.23	1630.03	1505.96	1517.74	109.401	972.936	496.097	526.145	2.88465	0.0182296
A0A3Q0J954	A0A3Q0J954|A0A3Q0J954_DIACI	S	GGPGIGLS(+79.97)SSR	8	11	LOW QUALITY PROTEIN: myosin heavy chain, non-muscle-like OS=Diaphorina citri OX=121845 GN=LOC103514485 PE=3 SV=1	LOW QUALITY PROTEIN: myosin heavy chain, non-muscle-like	LOC103514485	60.11	1066.48	6.5	2173	2183	S8:Phosphorylation (STY):8.69	S2180	GPGIGLSSSRVLG	9889.4	5436.99	6424.91	7250.43	4067.19	2068.95	1408.64	2514.93	2.88296	0.0392178
A0A3Q0JJ66	A0A3Q0JJ66|A0A3Q0JJ66_DIACI	S	GAGGGGGGS(+79.97)DRDS(+79.97)DAEFEQMLADAEDISK	9	29	Chromodomain-helicase-DNA-binding protein Mi-2 homolog OS=Diaphorina citri OX=121845 GN=LOC113465366 PE=4 SV=1	Chromodomain-helicase-DNA-binding protein Mi-2 homolog	LOC113465366	62.42	3001.13	-0.7	235	263	S9:Phosphorylation (STY):61.27;S13:Phosphorylation (STY):69.91	S243	GGGGGGSDRDSDA		3788.63	2575.82	3182.23	1186.56	454.496	1676.26	1105.77	2.87784	0.0483669
A0A3Q0JJ66	A0A3Q0JJ66|A0A3Q0JJ66_DIACI	S	GAGGGGGGS(+79.97)DRDS(+79.97)DAEFEQMLADAEDISK	13	29	Chromodomain-helicase-DNA-binding protein Mi-2 homolog OS=Diaphorina citri OX=121845 GN=LOC113465366 PE=4 SV=1	Chromodomain-helicase-DNA-binding protein Mi-2 homolog	LOC113465366	62.42	3001.13	-0.7	235	263	S9:Phosphorylation (STY):61.27;S13:Phosphorylation (STY):69.91	S247	GGSDRDSDAEFEQ		3788.63	2575.82	3182.23	1186.56	454.496	1676.26	1105.77	2.87784	0.0483669
A0A1S3D647	A0A1S3D647|A0A1S3D647_DIACI:A0A1S3D643|A0A1S3D643_DIACI	S	SDNQVSS(+79.97)S(+79.97)SESLSQPK	7	16	SAP domain-containing ribonucleoprotein isoform X2 OS=Diaphorina citri OX=121845 GN=LOC103512243 PE=4 SV=1	SAP domain-containing ribonucleoprotein isoform X2	LOC103512243	55.42	1838.7	1.2	105	120	S7:Phosphorylation (STY):5.47;S8:Phosphorylation (STY):8.14	S111	SDNQVSSSSESLS	1910.82	2498.27	2820.85	2409.98	609.124	1381.07	530.735	840.308	2.86797	0.0145154
A0A1S3D647	A0A1S3D647|A0A1S3D647_DIACI:A0A1S3D643|A0A1S3D643_DIACI	S	SDNQVSS(+79.97)S(+79.97)SESLSQPK	8	16	SAP domain-containing ribonucleoprotein isoform X2 OS=Diaphorina citri OX=121845 GN=LOC103512243 PE=4 SV=1	SAP domain-containing ribonucleoprotein isoform X2	LOC103512243	55.42	1838.7	1.2	105	120	S7:Phosphorylation (STY):5.47;S8:Phosphorylation (STY):8.14	S112	DNQVSSSSESLSQ	1910.82	2498.27	2820.85	2409.98	609.124	1381.07	530.735	840.308	2.86797	0.0145154
A0A3Q0IMG8	A0A3Q0IMG8|A0A3Q0IMG8_DIACI	S	A(+42.01)DS(+79.97)DDEYDR	3	9	Serrate RNA effector molecule homolog OS=Diaphorina citri OX=121845 GN=LOC108254592 PE=4 SV=1	Serrate RNA effector molecule homolog	LOC108254592	40.47	1206.37	2.8	2	10	A1:Acetylation (Protein N-term):1000.00;S3:Phosphorylation (STY):42.68	S4	___MADSDDEYDR	4245.12	3475.87	2743.29	3488.09	1985.73	422.464	1241.71	1216.64	2.86699	0.0221824
A0A3Q0IVR9	A0A3Q0IVR9|A0A3Q0IVR9_DIACI	S	SQS(+79.97)QLMR	3	7	Inositol 1,4,5-trisphosphate receptor OS=Diaphorina citri OX=121845 GN=LOC103507937 PE=3 SV=1	Inositol 1,4,5-trisphosphate receptor	LOC103507937	42	928.384	-3.4	1481	1487	S3:Phosphorylation (STY):14.04	S1483	KMERSQSQLMRLD	1271.5	930.301	1098.07	1099.96	416.141		356.816	386.479	2.8461	0.0116651
A0A3Q0J4U4	A0A3Q0J4U4|A0A3Q0J4U4_DIACI	S	DFFVS(+79.97)EQVS(+79.97)R	5	10	Uncharacterized protein LOC103512764 OS=Diaphorina citri OX=121845 GN=LOC103512764 PE=4 SV=1	Uncharacterized protein LOC103512764	LOC103512764	52.53	1372.51	-0.3	1337	1346		S1341	VKDFFVSEQVSRE	24126.2	15301.6	21761.9	20396.6	10593.8	7083.39	3992.07	7223.1	2.8238	0.0155054
A0A3Q0J4U4	A0A3Q0J4U4|A0A3Q0J4U4_DIACI	S	DFFVS(+79.97)EQVS(+79.97)R	9	10	Uncharacterized protein LOC103512764 OS=Diaphorina citri OX=121845 GN=LOC103512764 PE=4 SV=1	Uncharacterized protein LOC103512764	LOC103512764	52.53	1372.51	-0.3	1337	1346		S1345	FVSEQVSREMAKQ	24126.2	15301.6	21761.9	20396.6	10593.8	7083.39	3992.07	7223.1	2.8238	0.0155054
A0A3Q0J0B8	A0A3Q0J0B8|A0A3Q0J0B8_DIACI	S	M(+15.99)NS(+79.97)ILDTDSPSR	3	12	Twitchin-like OS=Diaphorina citri OX=121845 GN=LOC103512724 PE=3 SV=1	Twitchin-like	LOC103512724	63.6	1430.57	-0.3	1293	1304	M1:Oxidation (M):1000.00;S3:Phosphorylation (STY):92.39	S1295	ITRRMNSILDTDS	49181.1	23551.4	30057.3	34263.2	11499.5	10188.8	14876.5	12188.3	2.81117	0.0476434
A0A3Q0J428	A0A3Q0J428|A0A3Q0J428_DIACI	S	AKS(+79.97)AAVVEDIQR	3	12	Diacylglycerol O-acyltransferase 1-like OS=Diaphorina citri OX=121845 GN=LOC103512083 PE=4 SV=1	Diacylglycerol O-acyltransferase 1-like	LOC103512083	72.54	1365.67	1.4	12	23		S14	KLRRAKSAAVVED	10917.9	13692.9	9581.51	11397.4	2033.88	6204.34	3940.93	4059.72	2.80745	0.0126982
A0A1S3CX87	A0A1S3CX87|A0A1S3CX87_DIACI	S	ESEFDIS(+79.97)DEDK	7	11	Retinoblastoma-binding protein 5 homolog isoform X1 OS=Diaphorina citri OX=121845 GN=LOC103506291 PE=4 SV=1	Retinoblastoma-binding protein 5 homolog isoform X1	LOC103506291	37.26	1392.5	7.2	343	353	S7:Phosphorylation (STY):51.34	S349	ESEFDISDEDKSV	1523.47	886.308	1107.27	1172.35	698.876	217.146	338.733	418.252	2.80298	0.0331506
A0A1S3D197	A0A1S3D197|A0A1S3D197_DIACI	S	KSVS(+79.97)S(+79.97)DEEVPAK	4	12	Histone-lysine N-methyltransferase NSD3 OS=Diaphorina citri OX=121845 GN=LOC103509368 PE=4 SV=1	Histone-lysine N-methyltransferase NSD3	LOC103509368	38.84	1434.57	0.3	144	155	S4:Phosphorylation (STY):32.28;S5:Phosphorylation (STY):28.36	S147	SKRKSVSSDEEVP	8648.37	7046.93	6679.53	7458.28	5658.84	965.19	1400.83	2674.95	2.78819	0.0414521
A0A1S3D197	A0A1S3D197|A0A1S3D197_DIACI	S	KSVS(+79.97)S(+79.97)DEEVPAK	5	12	Histone-lysine N-methyltransferase NSD3 OS=Diaphorina citri OX=121845 GN=LOC103509368 PE=4 SV=1	Histone-lysine N-methyltransferase NSD3	LOC103509368	38.84	1434.57	0.3	144	155	S4:Phosphorylation (STY):32.28;S5:Phosphorylation (STY):28.36	S148	KRKSVSSDEEVPA	8648.37	7046.93	6679.53	7458.28	5658.84	965.19	1400.83	2674.95	2.78819	0.0414521
A0A1S4EFY6	A0A1S4EFY6|A0A1S4EFY6_DIACI	S	KDFSLES(+79.97)LADM	7	11	Uncharacterized protein LOC108252814 OS=Diaphorina citri OX=121845 GN=LOC108252814 PE=4 SV=1	Uncharacterized protein LOC108252814	LOC108252814	33.31	1334.55	-4	1225	1235	S7:Phosphorylation (STY):0.00	S1231	KDFSLESLADM__	470.635	665.952	799.961	645.516	165.518	407.526	121.941	231.662	2.78646	0.0338231
A0A3Q0IPJ2	A0A3Q0IPJ2|A0A3Q0IPJ2_DIACI	S	ATPEDDGDS(+79.97)LDLELEK	9	16	LOW QUALITY PROTEIN: obscurin-like OS=Diaphorina citri OX=121845 GN=LOC103507575 PE=3 SV=1	LOW QUALITY PROTEIN: obscurin-like	LOC103507575	43.4	1825.75	5.5	2166	2181	S9:Phosphorylation (STY):17.76	S2174	PEDDGDSLDLELE	1686.39	1782.77	1206.96	1558.71	809.687	199.167	679.295	562.716	2.76997	0.0179618
A0A1S4EGI6	A0A1S4EGI6|A0A1S4EGI6_DIACI	S	SADSS(+79.97)QGFR	5	9	Nucleoplasmin-like protein ANO39 isoform X1 OS=Diaphorina citri OX=121845 GN=LOC103513269 PE=3 SV=1	Nucleoplasmin-like protein ANO39 isoform X1	LOC103513269	56.52	1033.39	-2.1	22	30	S5:Phosphorylation (STY):24.44	S26	EKSADSSQGFRGE	5341.24	5693.34	6716.97	5917.18	2005.08		2293.52	2149.3	2.75307	0.00615134
A0A1S4EHC5	A0A1S4EHC5|A0A1S4EHC5_DIACI:A0A3Q0J3F3|A0A3Q0J3F3_DIACI	S	TLS(+79.97)QEDIYK	3	9	Protein vav-like OS=Diaphorina citri OX=121845 GN=LOC103514168 PE=4 SV=1	Protein vav-like	LOC103514168	50.86	1175.51	-3.4	139	147	S3:Phosphorylation (STY):14.04	S141	NPPRTLSQEDIYK	2431.85	2670.82	2462.59	2521.75	1445.7	238.628	1087.23	923.851	2.72961	0.0119715
A0A1S3DDD5	A0A1S3DDD5|A0A1S3DDD5_DIACI	T	T(+79.97)RPSKPPPPPR	1	11	Extensin-like OS=Diaphorina citri OX=121845 GN=LOC103515564 PE=4 SV=2	Extensin-like	LOC103515564	28.16	1308.67	-2.8	125	135	T1:Phosphorylation (STY):0.00	T125	GVEVLRTRPSKPP	4043.49	2999.8	4360.37	3801.22	809.641	1080.67	2313.47	1401.26	2.71272	0.0178788
A0A1S3DFC7	A0A1S3DFC7|A0A1S3DFC7_DIACI	T	T(+79.97)WTLC(+57.02)GTPEYLAPEIILSK	1	19	cAMP-dependent protein kinase catalytic subunit OS=Diaphorina citri OX=121845 GN=LOC103517463 PE=3 SV=1	cAMP-dependent protein kinase catalytic subunit	LOC103517463	65.42	2271.09	2.3	197	215	T1:Phosphorylation (STY):0.00;C5:Carbamidomethylation:1000.00	T197	KRVKGRTWTLCGT		454.67	344.411	399.54	237.064	123.895	81.1645	147.375	2.71105	0.0404701
A0A3Q0J881	A0A3Q0J881|A0A3Q0J881_DIACI	T	RSVDISAT(+79.97)PK	8	10	Neurofilament heavy polypeptide OS=Diaphorina citri OX=121845 GN=LOC103516499 PE=4 SV=1	Neurofilament heavy polypeptide	LOC103516499	36.53	1152.55	-1.3	8	17	T8:Phosphorylation (STY):45.01	T15	SVDISATPKKGEN	2568.75	2804.2	4434.71	3269.22	1452.83	388.296	1779.2	1206.77	2.70906	0.0459968
A0A1S3DIE5	A0A1S3DIE5|A0A1S3DIE5_DIACI:A0A1S3CXR6|A0A1S3CXR6_DIACI	S	QS(+79.97)SDPGFTK	2	9	Phosphatidylinositol 5-phosphate 4-kinase type-2 alpha OS=Diaphorina citri OX=121845 GN=LOC103519244 PE=4 SV=1	Phosphatidylinositol 5-phosphate 4-kinase type-2 alpha	LOC103519244	35.42	1045.41	6.1	116	124	S2:Phosphorylation (STY):0.00	S117	ESVTKQSSDPGFT	1435.8	1180.94	1531.97	1382.9	632.104	91.8178	820.418	514.78	2.6864	0.0230701
A0A1S3CY85	A0A1S3CY85|A0A1S3CY85_DIACI:A0A3Q0IPJ2|A0A3Q0IPJ2_DIACI	S	EM(+15.99)KS(+79.97)VEHFVR	4	10	Uncharacterized protein LOC103507527 OS=Diaphorina citri OX=121845 GN=LOC103507527 PE=4 SV=1	Uncharacterized protein LOC103507527	LOC103507527	33.33	1356.59	2.4	903	912		S906	QKREMKSVEHFVR	650.244	722.387	1135.51	836.047	247.732	428.257	261.629	312.539	2.67501	0.0318792
A0A1S4E908	A0A1S4E908|A0A1S4E908_DIACI:A0A1S4E954|A0A1S4E954_DIACI	S	LIESNS(+79.97)M(+15.99)K	6	8	Probable basic-leucine zipper transcription factor S OS=Diaphorina citri OX=121845 GN=LOC108252132 PE=4 SV=1	Probable basic-leucine zipper transcription factor S	LOC108252132	36.59	1016.42	-1.8	237	244	S6:Phosphorylation (STY):0.00;M7:Oxidation (M):1000.00	S242	KLIESNSMKTSQD	12076.6	11153.1	7612.27	10280.7	5712.41	224.748	5615.31	3850.82	2.66973	0.0470415
A0A1S3DU41	A0A1S3DU41|A0A1S3DU41_DIACI	S	RPERPSS(+79.97)AAGYGTLPK	7	16	Adhesive plaque matrix protein-like OS=Diaphorina citri OX=121845 GN=LOC103524757 PE=4 SV=1	Adhesive plaque matrix protein-like	LOC103524757	57	1765.85	3.8	475	490	S7:Phosphorylation (STY):8.14	S481	RPERPSSAAGYGT	48962.2	34797.7	38420.3	40726.7	26561.8	3963.68	15373.8	15299.8	2.66192	0.0309015
A0A1S3DI48	A0A1S3DI48|A0A1S3DI48_DIACI	T	ET(+79.97)VSEESDQVC(+57.02)LSK	2	14	Translation elongation factor 2 OS=Diaphorina citri OX=121845 GN=LOC103518196 PE=4 SV=1	Translation elongation factor 2	LOC103518196	53.66	1689.68	1.5	562	575	T2:Phosphorylation (STY):14.63;C11:Carbamidomethylation:1000.00	T563	VVSYRETVSEESD	1916.66	1594.53	1709.78	1740.33	753.639	675.462	541.407	656.836	2.64956	0.000656353
A0A1S3DI48	A0A1S3DI48|A0A1S3DI48_DIACI	S	ETVS(+79.97)EESDQVC(+57.02)LSK	4	14	Translation elongation factor 2 OS=Diaphorina citri OX=121845 GN=LOC103518196 PE=4 SV=1	Translation elongation factor 2	LOC103518196	52.03	1689.68	3.5	562	575	S4:Phosphorylation (STY):0.00;C11:Carbamidomethylation:1000.00	S565	SYRETVSEESDQV	1916.66	1594.53	1709.78	1740.33	753.639	675.462	541.407	656.836	2.64956	0.000656353
A0A3Q0IPJ2	A0A3Q0IPJ2|A0A3Q0IPJ2_DIACI	S	S(+79.97)PVVERS(+79.97)PIPEDSTVVAEEQAEEDM(+15.99)DR	1	27	LOW QUALITY PROTEIN: obscurin-like OS=Diaphorina citri OX=121845 GN=LOC103507575 PE=3 SV=1	LOW QUALITY PROTEIN: obscurin-like	LOC103507575	55.52	3189.31	-0.9	616	642	S1:Phosphorylation (STY):19.27;S7:Phosphorylation (STY):22.09;M25:Oxidation (M):1000.00	S616	SPVVDRSPVVERS	3647.23	2536.91	2677.15	2953.76	1553.77	326.865	1467.64	1116.09	2.64653	0.0252578
A0A3Q0IPJ2	A0A3Q0IPJ2|A0A3Q0IPJ2_DIACI	S	S(+79.97)PVVERS(+79.97)PIPEDSTVVAEEQAEEDM(+15.99)DR	7	27	LOW QUALITY PROTEIN: obscurin-like OS=Diaphorina citri OX=121845 GN=LOC103507575 PE=3 SV=1	LOW QUALITY PROTEIN: obscurin-like	LOC103507575	55.52	3189.31	-0.9	616	642	S1:Phosphorylation (STY):19.27;S7:Phosphorylation (STY):22.09;M25:Oxidation (M):1000.00	S622	SPVVERSPIPEDS	3647.23	2536.91	2677.15	2953.76	1553.77	326.865	1467.64	1116.09	2.64653	0.0252578
A0A1S3D0T2	A0A1S3D0T2|A0A1S3D0T2_DIACI	S	VIEEAS(+79.97)YEYK	6	10	Uncharacterized protein LOC103509094 OS=Diaphorina citri OX=121845 GN=LOC103509094 PE=4 SV=1	Uncharacterized protein LOC103509094	LOC103509094	54.63	1309.55	-1.3	33	42	S6:Phosphorylation (STY):8.69	S38	RVIEEASYEYKFK	15579.4	13532.9	13391.8	14168	8748.58	752.685	6577.41	5359.56	2.6435	0.0240555
A0A3Q0IVQ8	A0A3Q0IVQ8|A0A3Q0IVQ8_DIACI	S	RLS(+79.97)KPGSILAK	3	11	LOW QUALITY PROTEIN: titin-like OS=Diaphorina citri OX=121845 GN=LOC103510529 PE=3 SV=1	LOW QUALITY PROTEIN: titin-like	LOC103510529	42.29	1248.7	-0.5	4751	4761	S3:Phosphorylation (STY):0.00	S4753	VGGKRLSKPGSIL	2741.13	2411.38	1607.29	2253.27	288.897	1058.83	1215.33	854.351	2.6374	0.0340199
A0A3Q0IZK0	A0A3Q0IZK0|A0A3Q0IZK0_DIACI	S	AGQS(+79.97)FSFDVK	4	10	LOW QUALITY PROTEIN: twitchin-like OS=Diaphorina citri OX=121845 GN=LOC103512392 PE=4 SV=1	LOW QUALITY PROTEIN: twitchin-like	LOC103512392	62.36	1164.49	-2.3	5805	5814	S4:Phosphorylation (STY):22.85	S5808	KIKAGQSFSFDVK	6200.62	6372.93	4832.49	5802.01	3338.85	1111.35	2157.2	2202.47	2.63433	0.0111629
A0A3Q0JAL1	A0A3Q0JAL1|A0A3Q0JAL1_DIACI	S	LLSETGPGS(+79.97)HLTTPVETHR	9	19	Nesprin-1-like OS=Diaphorina citri OX=121845 GN=LOC103517667 PE=4 SV=1	Nesprin-1-like	LOC103517667	42.41	2111	0	499	517	S9:Phosphorylation (STY):0.00	S507	SETGPGSHLTTPV	1469.44	868.137	1339.7	1225.76	640.159	328.263	437.906	468.776	2.61481	0.0207258
A0A3Q0ISB8	A0A3Q0ISB8|A0A3Q0ISB8_DIACI	S	LPS(+79.97)PPPQK	3	8	Uncharacterized protein C4G9.04c-like OS=Diaphorina citri OX=121845 GN=LOC103508905 PE=4 SV=1	Uncharacterized protein C4G9.04c-like	LOC103508905	43.33	942.458	-1.1	6	13		S8	DGGRLPSPPPQKR	2760.29	2956.25	3008.13	2908.23	1209.61	1927.01	229.753	1122.13	2.59171	0.0229824
A0A3Q0J8I4	A0A3Q0J8I4|A0A3Q0J8I4_DIACI	S	KVS(+79.97)NVVSSDHSIIK	3	14	Dentin sialophosphoprotein-like OS=Diaphorina citri OX=121845 GN=LOC113469479 PE=4 SV=1	Dentin sialophosphoprotein-like	LOC113469479	43.86	1591.8	2.8	179	192	S3:Phosphorylation (STY):25.70	S181	KTLKKVSNVVSSD	599.238	832.66	904.754	778.884	456.188	237.584	208.682	300.818	2.58922	0.0167378
A0A1S3CTU9	A0A1S3CTU9|A0A1S3CTU9_DIACI	S	TASSS(+79.97)DSENVYR	5	12	Uncharacterized protein LOC103505042 OS=Diaphorina citri OX=121845 GN=LOC103505042 PE=4 SV=1	Uncharacterized protein LOC103505042	LOC103505042	61.17	1394.54	0.3	204	215	S5:Phosphorylation (STY):0.00	S208	KRTASSSDSENVY	10542.6	6362.34	6259.12	7721.34	2680.94	1715.57	4555.37	2983.96	2.58761	0.0445297
A0A3Q0IPJ2	A0A3Q0IPJ2|A0A3Q0IPJ2_DIACI	T	IEMSST(+79.97)PDGAVK	6	12	LOW QUALITY PROTEIN: obscurin-like OS=Diaphorina citri OX=121845 GN=LOC103507575 PE=3 SV=1	LOW QUALITY PROTEIN: obscurin-like	LOC103507575	40.06	1313.56	3.2	3307	3318	T6:Phosphorylation (STY):8.14	T3312	RIEMSSTPDGAVK	340.064	251.507	213.596	268.389	154.746	77.0733	79.9914	103.937	2.58223	0.0221212
A0A1S4ESW4	A0A1S4ESW4|A0A1S4ESW4_DIACI	T	FFPASEDHT(+79.97)SVEYK	9	14	Uncharacterized protein LOC103524922 OS=Diaphorina citri OX=121845 GN=LOC103524922 PE=4 SV=1	Uncharacterized protein LOC103524922	LOC103524922	55.89	1735.71	-0.7	256	269	T9:Phosphorylation (STY):0.00	T264	PASEDHTSVEYKL	20876.1	23760.8	17086.2	20574.4	6770.12	12146.7	4988.36	7968.39	2.582	0.0120741
A0A3Q0ILY5	A0A3Q0ILY5|A0A3Q0ILY5_DIACI	S	LEELTLDDS(+79.97)ENLEQSLK	9	17	ATPase family AAA domain-containing protein 1-like OS=Diaphorina citri OX=121845 GN=LOC103524452 PE=4 SV=1	ATPase family AAA domain-containing protein 1-like	LOC103524452	59.58	2054.93	5.9	90	106	S9:Phosphorylation (STY):38.03	S98	ELTLDDSENLEQS	1232.02	1020.67	728.383	993.69	277.752	482.069	410.889	390.237	2.54638	0.0187159
A0A1S4EG57	A0A1S4EG57|A0A1S4EG57_DIACI:A0A3Q0J0T6|A0A3Q0J0T6_DIACI	T	NVPT(+79.97)EERSEEISLSK	4	15	Uncharacterized protein DDB_G0283697 isoform X2 OS=Diaphorina citri OX=121845 GN=LOC103512962 PE=4 SV=1	Uncharacterized protein DDB_G0283697 isoform X2	LOC103512962	31.71	1796.82	0.7	225	239	T4:Phosphorylation (STY):0.00	T228	RLKNVPTEERSEE	44800.3	27965.2	28775.4	33847	21250.5	10068.3	8708.66	13342.5	2.53678	0.0388339
A0A1S3DFT6	A0A1S3DFT6|A0A1S3DFT6_DIACI	S	SDISADS(+79.97)IER	7	10	Epidermal growth factor receptor kinase substrate 8 OS=Diaphorina citri OX=121845 GN=LOC103517601 PE=3 SV=1	Epidermal growth factor receptor kinase substrate 8	LOC103517601	47.89	1171.48	-2.7	531	540	S7:Phosphorylation (STY):44.44	S537	SDISADSIERNGG	6194.55	6499.72	4869.93	5854.73	2964.75	2706.83	1293.93	2321.84	2.52159	0.00804604
A0A1S3D555	A0A1S3D555|A0A1S3D555_DIACI:A0A3Q0IYB1|A0A3Q0IYB1_DIACI	S	SVVETSNM(+15.99)SPQS(+79.97)PQKS	12	16	S-methyl-5'-thioadenosine phosphorylase OS=Diaphorina citri OX=121845 GN=LOC103511694 PE=3 SV=1	S-methyl-5'-thioadenosine phosphorylase	LOC103511694	59.86	1800.76	-0.1	268	283	M8:Oxidation (M):1000.00;S12:Phosphorylation (STY):8.87	S279	SNMSPQSPQKS__	6356.07	4576.38	4808.4	5246.95	1192.3	2508.35	2549.81	2083.48	2.51835	0.0114519
A0A1S3D6D1	A0A1S3D6D1|A0A1S3D6D1_DIACI:A0A3Q0IZ82|A0A3Q0IZ82_DIACI	S	IAS(+79.97)PAPS(+79.97)PVPANAR	3	14	Mucin-19 isoform X1 OS=Diaphorina citri OX=121845 GN=LOC103512378 PE=4 SV=1	Mucin-19 isoform X1	LOC103512378	57.38	1506.66	-2.7	1846	1859		S1848	TRAKIASPAPSPV	5509.28	4137.91	4255.71	4634.3	2164.55	1212.6	2149.76	1842.3	2.51549	0.0066545
A0A1S3D6D1	A0A1S3D6D1|A0A1S3D6D1_DIACI:A0A3Q0IZ82|A0A3Q0IZ82_DIACI	S	IAS(+79.97)PAPS(+79.97)PVPANAR	7	14	Mucin-19 isoform X1 OS=Diaphorina citri OX=121845 GN=LOC103512378 PE=4 SV=1	Mucin-19 isoform X1	LOC103512378	57.38	1506.66	-2.7	1846	1859		S1852	IASPAPSPVPANA	5509.28	4137.91	4255.71	4634.3	2164.55	1212.6	2149.76	1842.3	2.51549	0.0066545
A0A3Q0JD23	A0A3Q0JD23|A0A3Q0JD23_DIACI	T	ILKEEKST(+79.97)ES(+79.97)LPEEK	8	15	Titin OS=Diaphorina citri OX=121845 GN=LOC103518851 PE=4 SV=1	Titin	LOC103518851	39.2	1918.86	12.9	6139	6153	T8:Phosphorylation (STY):0.00;S10:Phosphorylation (STY):0.00	T6146	LKEEKSTESLPEE	5947.83	6521.15	8938.98	7135.99	2730.04	856.141	4927.69	2837.96	2.51448	0.0449336
A0A3Q0JD23	A0A3Q0JD23|A0A3Q0JD23_DIACI	S	ILKEEKST(+79.97)ES(+79.97)LPEEK	10	15	Titin OS=Diaphorina citri OX=121845 GN=LOC103518851 PE=4 SV=1	Titin	LOC103518851	39.2	1918.86	12.9	6139	6153	T8:Phosphorylation (STY):0.00;S10:Phosphorylation (STY):0.00	S6148	EEKSTESLPEEKT	5947.83	6521.15	8938.98	7135.99	2730.04	856.141	4927.69	2837.96	2.51448	0.0449336
A0A3Q0IZK0	A0A3Q0IZK0|A0A3Q0IZK0_DIACI	S	AS(+79.97)DASDVIIAR	2	11	LOW QUALITY PROTEIN: twitchin-like OS=Diaphorina citri OX=121845 GN=LOC103512392 PE=4 SV=1	LOW QUALITY PROTEIN: twitchin-like	LOC103512392	62.46	1196.54	-4.3	5910	5920	S2:Phosphorylation (STY):45.70	S5911	AGTGRASDASDVI	1020.54	1815.49	1692.48	1509.5	354.841	457.301	992.38	601.507	2.50954	0.045474
A0A3Q0J8W1	A0A3Q0J8W1|A0A3Q0J8W1_DIACI	S	ENLIEDASEVLS(+79.97)KIS(+79.97)EDT(+79.97)LINT(+79.97)SKFSS(+79.97)PSPK	12	31	Neurofilament heavy polypeptide-like OS=Diaphorina citri OX=121845 GN=LOC113470579 PE=4 SV=1	Neurofilament heavy polypeptide-like	LOC113470579	26.07	3777.54	0.9	231	261	S12:Phosphorylation (STY):6.65;S15:Phosphorylation (STY):10.87;T18:Phosphorylation (STY):14.62;T22:Phosphorylation (STY):12.28;S27:Phosphorylation (STY):0.00	S242	DASEVLSKISEDT	215.695	443.568	368.787	342.683	131.515	123.432	155.351	136.766	2.50561	0.0384169
A0A3Q0J8W1	A0A3Q0J8W1|A0A3Q0J8W1_DIACI	S	ENLIEDASEVLS(+79.97)KIS(+79.97)EDT(+79.97)LINT(+79.97)SKFSS(+79.97)PSPK	15	31	Neurofilament heavy polypeptide-like OS=Diaphorina citri OX=121845 GN=LOC113470579 PE=4 SV=1	Neurofilament heavy polypeptide-like	LOC113470579	26.07	3777.54	0.9	231	261	S12:Phosphorylation (STY):6.65;S15:Phosphorylation (STY):10.87;T18:Phosphorylation (STY):14.62;T22:Phosphorylation (STY):12.28;S27:Phosphorylation (STY):0.00	S245	EVLSKISEDTLIN	215.695	443.568	368.787	342.683	131.515	123.432	155.351	136.766	2.50561	0.0384169
A0A3Q0J8W1	A0A3Q0J8W1|A0A3Q0J8W1_DIACI	T	ENLIEDASEVLS(+79.97)KIS(+79.97)EDT(+79.97)LINT(+79.97)SKFSS(+79.97)PSPK	18	31	Neurofilament heavy polypeptide-like OS=Diaphorina citri OX=121845 GN=LOC113470579 PE=4 SV=1	Neurofilament heavy polypeptide-like	LOC113470579	26.07	3777.54	0.9	231	261	S12:Phosphorylation (STY):6.65;S15:Phosphorylation (STY):10.87;T18:Phosphorylation (STY):14.62;T22:Phosphorylation (STY):12.28;S27:Phosphorylation (STY):0.00	T248	SKISEDTLINTSK	215.695	443.568	368.787	342.683	131.515	123.432	155.351	136.766	2.50561	0.0384169
A0A3Q0J8W1	A0A3Q0J8W1|A0A3Q0J8W1_DIACI	T	ENLIEDASEVLS(+79.97)KIS(+79.97)EDT(+79.97)LINT(+79.97)SKFSS(+79.97)PSPK	22	31	Neurofilament heavy polypeptide-like OS=Diaphorina citri OX=121845 GN=LOC113470579 PE=4 SV=1	Neurofilament heavy polypeptide-like	LOC113470579	26.07	3777.54	0.9	231	261	S12:Phosphorylation (STY):6.65;S15:Phosphorylation (STY):10.87;T18:Phosphorylation (STY):14.62;T22:Phosphorylation (STY):12.28;S27:Phosphorylation (STY):0.00	T252	EDTLINTSKFSSP	215.695	443.568	368.787	342.683	131.515	123.432	155.351	136.766	2.50561	0.0384169
A0A3Q0J8W1	A0A3Q0J8W1|A0A3Q0J8W1_DIACI	S	ENLIEDASEVLS(+79.97)KIS(+79.97)EDT(+79.97)LINT(+79.97)SKFSS(+79.97)PSPK	27	31	Neurofilament heavy polypeptide-like OS=Diaphorina citri OX=121845 GN=LOC113470579 PE=4 SV=1	Neurofilament heavy polypeptide-like	LOC113470579	26.07	3777.54	0.9	231	261	S12:Phosphorylation (STY):6.65;S15:Phosphorylation (STY):10.87;T18:Phosphorylation (STY):14.62;T22:Phosphorylation (STY):12.28;S27:Phosphorylation (STY):0.00	S257	NTSKFSSPSPKES	215.695	443.568	368.787	342.683	131.515	123.432	155.351	136.766	2.50561	0.0384169
A0A3Q0J8I4	A0A3Q0J8I4|A0A3Q0J8I4_DIACI	S	KKSQIS(+79.97)DSSNVETLQQTESSDK	6	22	Dentin sialophosphoprotein-like OS=Diaphorina citri OX=121845 GN=LOC113469479 PE=4 SV=1	Dentin sialophosphoprotein-like	LOC113469479	53.93	2518.14	-2.2	384	405	S6:Phosphorylation (STY):0.00	S389	KKKSQISDSSNVE	1566.47	1763.46	1849.93	1726.62	742.381	1089.81	236.114	689.434	2.50441	0.0166247
A0A1S4EIH4	A0A1S4EIH4|A0A1S4EIH4_DIACI	T	RLT(+79.97)DPEIK	3	8	Bifunctional purine biosynthesis protein ATIC OS=Diaphorina citri OX=121845 GN=LOC103515106 PE=3 SV=1	Bifunctional purine biosynthesis protein ATIC	LOC103515106	51.66	1050.51	-0.3	299	306		T301	AVFRRLTDPEIKA	11108.3	12296.2	7180.22	10194.9	4345.99	2926.26	4947.4	4073.22	2.50291	0.0209747
A0A3Q0JJ87	A0A3Q0JJ87|A0A3Q0JJ87_DIACI	T	ASTTPST(+79.97)PTEFK	7	12	Nuclear protein localization protein 4 homolog OS=Diaphorina citri OX=121845 GN=LOC113472850 PE=4 SV=1	Nuclear protein localization protein 4 homolog	LOC113472850	40.05	1345.58	-1.9	105	116	T7:Phosphorylation (STY):11.06	T111	ASTTPSTPTEFKS	4459.27	2767.57	2674.73	3300.52	1266.35	795.528	1919.71	1327.2	2.48684	0.0413063
A0A3Q0J2I1	A0A3Q0J2I1|A0A3Q0J2I1_DIACI	S	TAPVSAVSS(+79.97)PGDESR	9	15	Uncharacterized protein LOC113468315 OS=Diaphorina citri OX=121845 GN=LOC113468315 PE=4 SV=1	Uncharacterized protein LOC113468315	LOC113468315	52.24	1538.66	-0.2	32	46	S9:Phosphorylation (STY):10.11	S40	PVSAVSSPGDESR	1974.18	2129.98	2193.01	2099.05	98.414	1026.02	1418.75	847.727	2.4761	0.0343964
A0A3Q0IV31	A0A3Q0IV31|A0A3Q0IV31_DIACI:A0A1S3DQH2|A0A1S3DQH2_DIACI:A0A0A7DNU3|A0A0A7DNU3_DIACI	S	GS(+79.97)EYDIDSEITDMQNSLEK	2	19	Facilitated trehalose transporter Tret1-2 homolog OS=Diaphorina citri OX=121845 GN=LOC103510222 PE=4 SV=1	Facilitated trehalose transporter Tret1-2 homolog	LOC103510222	59.19	2252.9	1.2	276	294	S2:Phosphorylation (STY):0.00	S277	LQWFRGSEYDIDS	2082.31	3813.4	2659.9	2851.87	907.366	1186.11	1366.97	1153.49	2.47239	0.0320326
A0A1S4EHZ4	A0A1S4EHZ4|A0A1S4EHZ4_DIACI:A0A1S3DA57|A0A1S3DA57_DIACI	S	KVS(+79.97)EAFVK	3	8	Glycerol-3-phosphate dehydrogenase [NAD(+)] OS=Diaphorina citri OX=121845 GN=LOC103514396 PE=3 SV=1	Glycerol-3-phosphate dehydrogenase [NAD(+)]	LOC103514396	32.09	986.484	-4.9	235	242		S237	GRNRKVSEAFVKT	1444.04	2008.56	1724.78	1725.8	823.622		577.507	700.564	2.46344	0.0208983
A0A1S3D013	A0A1S3D013|A0A1S3D013_DIACI:A0A1S3CVP9|A0A1S3CVP9_DIACI:A0A3Q0ILA9|A0A3Q0ILA9_DIACI	Y	IWHHTFY(+79.97)NELR	7	11	Actin-1 OS=Diaphorina citri OX=121845 GN=LOC103508596 PE=3 SV=1	Actin-1	LOC103508596	43.97	1594.71	-8.4	86	96	Y7:Phosphorylation (STY):28.86	Y92	IWHHTFYNELRVA	1219.97	1576.11	986.122	1260.73	303.626	644.142	592.965	513.578	2.45481	0.0207393
A0A1S3DBI6	A0A1S3DBI6|A0A1S3DBI6_DIACI:A0A1S3DBA0|A0A1S3DBA0_DIACI:A0A1S3DBH7|A0A1S3DBH7_DIACI	S	YQTYM(+15.99)EESEANS(+79.97)PAGM(+15.99)R	12	17	Formin-binding protein 1-like isoform X1 OS=Diaphorina citri OX=121845 GN=LOC103515191 PE=4 SV=1	Formin-binding protein 1-like isoform X1	LOC103515191	40.14	2074.76	-8.4	431	447	M5:Oxidation (M):1000.00;S12:Phosphorylation (STY):34.30;M16:Oxidation (M):1000.00	S442	EESEANSPAGMRK	449.392	371.607	329.248	383.416	237.341	156.278	75.2296	156.283	2.45334	0.0178489
A0A3Q0J8I4	A0A3Q0J8I4|A0A3Q0J8I4_DIACI	S	KKS(+79.97)QISDSSNVETLQQTESSDK	3	22	Dentin sialophosphoprotein-like OS=Diaphorina citri OX=121845 GN=LOC113469479 PE=4 SV=1	Dentin sialophosphoprotein-like	LOC113469479	37.88	2518.14	2.7	384	405	S3:Phosphorylation (STY):4.52	S386	SKHKKKSQISDSS	1566.47	1763.46	1849.93	1726.62	742.381	1135.77	236.114	704.755	2.44996	0.0202023
A0A3Q0J968	A0A3Q0J968|A0A3Q0J968_DIACI	S	RVGS(+79.97)TVEEVPIVIGSK	4	16	Delta-1-pyrroline-5-carboxylate dehydrogenase, mitochondrial OS=Diaphorina citri OX=121845 GN=LOC103514504 PE=3 SV=1	Delta-1-pyrroline-5-carboxylate dehydrogenase, mitochondrial	LOC103514504	41.45	1748.91	1.5	41	56	S4:Phosphorylation (STY):8.69	S44	ALKRVGSTVEEVP	1097.05	1431.08	1090.18	1206.1	591.169	598.948	288.218	492.778	2.44755	0.00937157
A0A3Q0JHL0	A0A3Q0JHL0|A0A3Q0JHL0_DIACI	S	YGVDNPS(+79.97)QELTPVHPVTHK	7	19	Aminopeptidase OS=Diaphorina citri OX=121845 GN=LOC113472375 PE=3 SV=1	Aminopeptidase	LOC113472375	44.62	2197.02	-3.4	269	287	S7:Phosphorylation (STY):16.51	S275	YGVDNPSQELTPV	802.647	1245.24	1642.57	1230.15	472.309	464.259	574.136	503.568	2.44287	0.0413945
Q0PXV3	Q0PXV3|Q0PXV3_DIACI	S	KEEEDDDDVDLFGS(+79.97)DDEEDEEAAK	14	24	Elongation factor 1-beta OS=Diaphorina citri OX=121845 GN=LOC103515208 PE=2 SV=1	Elongation factor 1-beta	LOC103515208	111.58	2823.03	0.8	83	106		S96	DVDLFGSDDEEDE	473500	412937	375736	420724	194894	161153	161234	172427	2.44001	0.00125808
A0A3Q0IHW2	A0A3Q0IHW2|A0A3Q0IHW2_DIACI	S	KLS(+79.97)SPAQPQAEPILAR	3	16	Calponin homology domain-containing protein DDB_G0272472-like OS=Diaphorina citri OX=121845 GN=LOC103524662 PE=4 SV=1	Calponin homology domain-containing protein DDB_G0272472-like	LOC103524662	39.83	1784.92	-2.7	165	180	S3:Phosphorylation (STY):8.14	S167	LIVRKLSSPAQPQ	2033.89	1485.74	1667.52	1729.05	670.469	708.185	748.134	708.929	2.43896	0.00330624
A0A3Q0J321	A0A3Q0J321|A0A3Q0J321_DIACI	S	QTANDLVAEGS(+79.97)EAGVGDATHLR	11	22	LOW QUALITY PROTEIN: microtubule-actin cross-linking factor 1, isoforms 1/2/3/5 OS=Diaphorina citri OX=121845 GN=LOC103512109 PE=4 SV=1	LOW QUALITY PROTEIN: microtubule-actin cross-linking factor 1, isoforms 1/2/3/5	LOC103512109	59.85	2290.02	1.3	5786	5807	S11:Phosphorylation (STY):29.57	S5796	DLVAEGSEAGVGD	16446.1	13286.6	9229.36	12987.3	7185.36	3921.02	4897.43	5334.61	2.43455	0.0292505
A0A3Q0J4V2	A0A3Q0J4V2|A0A3Q0J4V2_DIACI	Y	LAQGEY(+79.97)IVPEK	6	11	Long-chain-fatty-acid--CoA ligase 6 OS=Diaphorina citri OX=121845 GN=LOC103512608 PE=4 SV=1	Long-chain-fatty-acid--CoA ligase 6	LOC103512608	54.55	1325.63	-0.7	379	389		Y384	KLAQGEYIVPEKI	1041.04	1117.78	901.183	1020	149.477	508.787	600.448	419.571	2.43106	0.0166395
A0A3Q0IVQ8	A0A3Q0IVQ8|A0A3Q0IVQ8_DIACI	S	SRS(+79.97)EERDEDIDEHITQPR	3	18	LOW QUALITY PROTEIN: titin-like OS=Diaphorina citri OX=121845 GN=LOC103510529 PE=3 SV=1	LOW QUALITY PROTEIN: titin-like	LOC103510529	65.42	2290.98	-3.8	1897	1914	S3:Phosphorylation (STY):0.00	S1899	KAPKSRSEERDED	46769.7	39988.6	36876.2	41211.5	22186.3	19816.3	8873.52	16958.7	2.43011	0.00853683
A0A3Q0IX48	A0A3Q0IX48|A0A3Q0IX48_DIACI	T	T(+79.97)SPELS(+79.97)PNTGSSWILVGR	1	18	LOW QUALITY PROTEIN: Golgi-specific brefeldin A-resistance guanine nucleotide exchange factor 1-like OS=Diaphorina citri OX=121845 GN=LOC103511171 PE=4 SV=1	LOW QUALITY PROTEIN: Golgi-specific brefeldin A-resistance guanine nucleotide exchange factor 1-like	LOC103511171	35.06	2059.9	-4.7	1242	1259	T1:Phosphorylation (STY):0.00;S6:Phosphorylation (STY):3.29	T1242	SSGVVKTSPELSP	9666.18	7239.41	8793.03	8566.21	4358.06	3460.94	2797.59	3538.86	2.42061	0.00394365
A0A3Q0IX48	A0A3Q0IX48|A0A3Q0IX48_DIACI	S	T(+79.97)SPELS(+79.97)PNTGSSWILVGR	6	18	LOW QUALITY PROTEIN: Golgi-specific brefeldin A-resistance guanine nucleotide exchange factor 1-like OS=Diaphorina citri OX=121845 GN=LOC103511171 PE=4 SV=1	LOW QUALITY PROTEIN: Golgi-specific brefeldin A-resistance guanine nucleotide exchange factor 1-like	LOC103511171	35.06	2059.9	-4.7	1242	1259	T1:Phosphorylation (STY):0.00;S6:Phosphorylation (STY):3.29	S1247	KTSPELSPNTGSS	9666.18	7239.41	8793.03	8566.21	4358.06	3460.94	2797.59	3538.86	2.42061	0.00394365
A0A3Q0IPB1	A0A3Q0IPB1|A0A3Q0IPB1_DIACI	S	GEADPFAGDETS(+79.97)QPAKDSEDNAEK	12	24	Myb-like protein X OS=Diaphorina citri OX=121845 GN=LOC103507386 PE=4 SV=1	Myb-like protein X	LOC103507386	35.21	2587.02	-2.8	130	153	S12:Phosphorylation (STY):0.00	S141	FAGDETSQPAKDS	1641.51	2215.91	2382.92	2080.11	1460.74	247.769	885.198	864.569	2.40596	0.0431854
A0A3Q0IQ40	A0A3Q0IQ40|A0A3Q0IQ40_DIACI	S	DDGYS(+79.97)PPPSK	5	10	Tudor domain-containing protein 7 OS=Diaphorina citri OX=121845 GN=LOC103505289 PE=4 SV=1	Tudor domain-containing protein 7	LOC103505289	25.32	1141.43	-2.3	169	178	S5:Phosphorylation (STY):9.34	S173	PRDDGYSPPPSKY	439.315	401.312	333.218	391.282	223.471	86.5702	178.182	162.741	2.40432	0.0108612
A0A1S3DL51	A0A1S3DL51|A0A1S3DL51_DIACI:A0A3Q0JG70|A0A3Q0JG70_DIACI:A0A3Q0JFW5|A0A3Q0JFW5_DIACI:A0A3Q0JJQ1|A0A3Q0JJQ1_DIACI:A0A3Q0JFX0|A0A3Q0JFX0_DIACI	S	QVS(+79.97)PIDTSALASPTVR	3	16	Serine/arginine-rich splicing factor 4-like OS=Diaphorina citri OX=121845 GN=LOC103520475 PE=4 SV=1	Serine/arginine-rich splicing factor 4-like	LOC103520475	47.54	1720.84	-4.6	51	66	S3:Phosphorylation (STY):49.79	S53	PRGRQVSPIDTSA	208.947	231.252	299.744	246.648	88.5499	71.132	150.599	103.427	2.38475	0.0170978
A0A3Q0IZK0	A0A3Q0IZK0|A0A3Q0IZK0_DIACI	S	S(+79.97)FESKEEDNKDVPPYLR	1	17	LOW QUALITY PROTEIN: twitchin-like OS=Diaphorina citri OX=121845 GN=LOC103512392 PE=4 SV=1	LOW QUALITY PROTEIN: twitchin-like	LOC103512392	38.17	2131.95	-1.2	707	723	S1:Phosphorylation (STY):0.00	S707	RKPSLKSFESKEE	3706.97	3533.23	4396.43	3878.87	1915.13	1325.06	1642.75	1627.65	2.38312	0.00200217
A0A3Q0J807	A0A3Q0J807|A0A3Q0J807_DIACI	S	RLPS(+79.97)QT(+79.97)SSGGLTNNK	4	15	Probable serine/threonine-protein kinase MARK-A OS=Diaphorina citri OX=121845 GN=LOC103516748 PE=4 SV=1	Probable serine/threonine-protein kinase MARK-A	LOC103516748	29.73	1718.74	-3	610	624	S4:Phosphorylation (STY):0.00;T6:Phosphorylation (STY):0.00	S613	TRRRLPSQTSSGG	3159.4	4234.45	4114.88	3836.24	1928.54	1316.29	1606.3	1617.04	2.37238	0.00442694
A0A3Q0J807	A0A3Q0J807|A0A3Q0J807_DIACI	T	RLPS(+79.97)QT(+79.97)SSGGLTNNK	6	15	Probable serine/threonine-protein kinase MARK-A OS=Diaphorina citri OX=121845 GN=LOC103516748 PE=4 SV=1	Probable serine/threonine-protein kinase MARK-A	LOC103516748	29.73	1718.74	-3	610	624	S4:Phosphorylation (STY):0.00;T6:Phosphorylation (STY):0.00	T615	RRLPSQTSSGGLT	3159.4	4234.45	4114.88	3836.24	1928.54	1316.29	1606.3	1617.04	2.37238	0.00442694
A0A3Q0IZD5	A0A3Q0IZD5|A0A3Q0IZD5_DIACI	S	NDS(+79.97)TSEFQPLEDK	3	13	Glutamine--fructose-6-phosphate aminotransferase [isomerizing] 2 isoform X1 OS=Diaphorina citri OX=121845 GN=LOC103512306 PE=4 SV=1	Glutamine--fructose-6-phosphate aminotransferase [isomerizing] 2 isoform X1	LOC103512306	69.52	1588.63	1.2	7	19	S3:Phosphorylation (STY):27.96	S9	MLPRNDSTSEFQP	25807.5	16949	22513.6	21756.7	9215.26	6187.99	12166.3	9189.83	2.36748	0.0155641
Q0PXX2	Q0PXX2|Q0PXX2_DIACI	S	LASMPSGGGAVS(+79.97)ASAGAAAPAAAAEEGKK	12	29	Large ribosomal subunit protein P2 OS=Diaphorina citri OX=121845 GN=LOC103516225 PE=2 SV=1	Large ribosomal subunit protein P2	LOC103516225	56.85	2564.19	-3.4	62	90	S12:Phosphorylation (STY):0.00	S73	SGGGAVSASAGAA	584.414	899.406	678.009	720.61	526.282	237.85	159.937	308.023	2.33947	0.046969
A0A1S3D2D0	A0A1S3D2D0|A0A1S3D2D0_DIACI	S	AGS(+79.97)AVDDFIDK	3	11	6-phosphogluconate dehydrogenase, decarboxylating OS=Diaphorina citri OX=121845 GN=LOC103510040 PE=3 SV=1	6-phosphogluconate dehydrogenase, decarboxylating	LOC103510040	57.14	1216.5	-3.6	85	95		S87	MLVKAGSAVDDFI	1638.92	2530.05	2060.46	2076.48	939.624	570.98	1166.77	892.458	2.32669	0.0188766
A0A3Q0JDY9	A0A3Q0JDY9|A0A3Q0JDY9_DIACI	T	T(+79.97)VETPS(+79.97)PTNTKPPLMSR	1	17	Serine/threonine-protein kinase pakE-like OS=Diaphorina citri OX=121845 GN=LOC103519335 PE=4 SV=1	Serine/threonine-protein kinase pakE-like	LOC103519335	31.82	2014.88	1.2	104	120	T1:Phosphorylation (STY):0.00;S6:Phosphorylation (STY):5.03	T104	NTSASRTVETPSP	8271.13	14503.8	11992.4	11589.1	5444.34	4674.17	4866.2	4994.9	2.32019	0.0225
A0A3Q0JDY9	A0A3Q0JDY9|A0A3Q0JDY9_DIACI	S	T(+79.97)VETPS(+79.97)PTNTKPPLMSR	6	17	Serine/threonine-protein kinase pakE-like OS=Diaphorina citri OX=121845 GN=LOC103519335 PE=4 SV=1	Serine/threonine-protein kinase pakE-like	LOC103519335	31.82	2014.88	1.2	104	120	T1:Phosphorylation (STY):0.00;S6:Phosphorylation (STY):5.03	S109	RTVETPSPTNTKP	8271.13	14503.8	11992.4	11589.1	5444.34	4674.17	4866.2	4994.9	2.32019	0.0225
A0A3Q0IXZ6	A0A3Q0IXZ6|A0A3Q0IXZ6_DIACI:A0A1S3D4V7|A0A1S3D4V7_DIACI:A0A3Q0J2A7|A0A3Q0J2A7_DIACI	T	SVT(+79.97)FPLSSTLQPGEVADEK	3	19	non-specific serine/threonine protein kinase OS=Diaphorina citri OX=121845 GN=LOC103511543 PE=4 SV=1	non-specific serine/threonine protein kinase	LOC103511543	69.88	2083.97	3.9	424	442	T3:Phosphorylation (STY):0.00	T426	PRKKSVTFPLSST	33156.9	35636.9	22195.3	30329.7	18664.9	11324.7	9474.76	13154.8	2.3056	0.0262985
A0A1S3CY94	A0A1S3CY94|A0A1S3CY94_DIACI	S	AIS(+79.97)PEQTDS(+79.97)VHSGTPEPFEVENR	3	23	Nuclear receptor-binding protein homolog OS=Diaphorina citri OX=121845 GN=LOC103507536 PE=4 SV=1	Nuclear receptor-binding protein homolog	LOC103507536	34.42	2685.1	-0.1	90	112	S3:Phosphorylation (STY):49.79;S9:Phosphorylation (STY):0.00	S92	IRPRAISPEQTDS	4494.79	3007.36	3234.11	3578.75	2433.46	685.718	1540.34	1553.17	2.30416	0.0416021
A0A1S3CY94	A0A1S3CY94|A0A1S3CY94_DIACI	S	AIS(+79.97)PEQTDS(+79.97)VHSGTPEPFEVENR	9	23	Nuclear receptor-binding protein homolog OS=Diaphorina citri OX=121845 GN=LOC103507536 PE=4 SV=1	Nuclear receptor-binding protein homolog	LOC103507536	34.42	2685.1	-0.1	90	112	S3:Phosphorylation (STY):49.79;S9:Phosphorylation (STY):0.00	S98	SPEQTDSVHSGTP	4494.79	3007.36	3234.11	3578.75	2433.46	685.718	1540.34	1553.17	2.30416	0.0416021
A0A3Q0IJL7	A0A3Q0IJL7|A0A3Q0IJL7_DIACI	T	RT(+79.97)PVKHPS(+79.97)TLDLPK	2	14	Dentin sialophosphoprotein-like OS=Diaphorina citri OX=121845 GN=LOC103505284 PE=4 SV=1	Dentin sialophosphoprotein-like	LOC103505284	32.9	1747.84	-2.4	281	294	T2:Phosphorylation (STY):8.82;S8:Phosphorylation (STY):0.00	T282	YQDARRTPVKHPS	1566.69	2096.02	2150.73	1937.81	1012.91	912.264	597.875	841.017	2.30413	0.00810175
A0A3Q0IJL7	A0A3Q0IJL7|A0A3Q0IJL7_DIACI	S	RT(+79.97)PVKHPS(+79.97)TLDLPK	8	14	Dentin sialophosphoprotein-like OS=Diaphorina citri OX=121845 GN=LOC103505284 PE=4 SV=1	Dentin sialophosphoprotein-like	LOC103505284	32.9	1747.84	-2.4	281	294	T2:Phosphorylation (STY):8.82;S8:Phosphorylation (STY):0.00	S288	TPVKHPSTLDLPK	1566.69	2096.02	2150.73	1937.81	1012.91	912.264	597.875	841.017	2.30413	0.00810175
A0A3Q0IXB0	A0A3Q0IXB0|A0A3Q0IXB0_DIACI:A0A1S3D0K0|A0A1S3D0K0_DIACI:A0A3Q0IX81|A0A3Q0IX81_DIACI:A0A3Q0J1H2|A0A3Q0J1H2_DIACI	S	LVS(+79.97)AVNDIEK	3	10	arginine kinase OS=Diaphorina citri OX=121845 GN=LOC103508767 PE=3 SV=1	arginine kinase	LOC103508767	60.2	1166.56	-0.6	266	275		S268	VYRRLVSAVNDIE	4245.66	3403.9	2645.37	3431.64	2133.42	722.021	1615.82	1490.42	2.30247	0.0350326
A0A1S3DJU3	A0A1S3DJU3|A0A1S3DJU3_DIACI	S	TVIHLSEVDM(+15.99)GDS(+79.97)AS(+79.97)DGDKPK	13	21	Otolith matrix protein OMM-64-like OS=Diaphorina citri OX=121845 GN=LOC103519765 PE=4 SV=1	Otolith matrix protein OMM-64-like	LOC103519765	81.59	2375.96	-2.2	126	146	M10:Oxidation (M):1000.00;S13:Phosphorylation (STY):82.17;S15:Phosphorylation (STY):83.11	S138	EVDMGDSASDGDK	61307.6	52841.1	43277.1	52475.2	32385.4	18140	17892.5	22806	2.30094	0.0137747
A0A1S3DJU3	A0A1S3DJU3|A0A1S3DJU3_DIACI	S	TVIHLSEVDM(+15.99)GDS(+79.97)AS(+79.97)DGDKPK	15	21	Otolith matrix protein OMM-64-like OS=Diaphorina citri OX=121845 GN=LOC103519765 PE=4 SV=1	Otolith matrix protein OMM-64-like	LOC103519765	81.59	2375.96	-2.2	126	146	M10:Oxidation (M):1000.00;S13:Phosphorylation (STY):82.17;S15:Phosphorylation (STY):83.11	S140	DMGDSASDGDKPK	61307.6	52841.1	43277.1	52475.2	32385.4	18140	17892.5	22806	2.30094	0.0137747
A0A1S3DMK0	A0A1S3DMK0|A0A1S3DMK0_DIACI	S	NQQSPIQIS(+79.97)PK	9	11	Nucleolin OS=Diaphorina citri OX=121845 GN=LOC103520654 PE=4 SV=1	Nucleolin	LOC103520654	49.26	1318.63	0.8	562	572	S9:Phosphorylation (STY):30.64	S570	QSPIQISPKTPSV	899.773	797.812	550.402	749.329	315.892	462.421	200.602	326.305	2.29641	0.0301207
A0A1S3CZY1	A0A1S3CZY1|A0A1S3CZY1_DIACI	S	RQS(+79.97)WHENWK	3	9	Chitobiosyldiphosphodolichol beta-mannosyltransferase OS=Diaphorina citri OX=121845 GN=LOC103508500 PE=4 SV=1	Chitobiosyldiphosphodolichol beta-mannosyltransferase	LOC103508500	27.08	1349.57	-2.4	236	244		S238	SVFRRQSWHENWK	317.446	445.406	379.612	380.822	208.819	142.608	147.96	166.462	2.28773	0.00733067
A0A1S3D5I9	A0A1S3D5I9|A0A1S3D5I9_DIACI	S	LYDIPDNTFDS(+79.97)DNEENEDEDGLPNM	11	25	Eukaryotic translation initiation factor 3 subunit D OS=Diaphorina citri OX=121845 GN=LOC103511871 PE=3 SV=1	Eukaryotic translation initiation factor 3 subunit D	LOC103511871	76.2	2980.11	-13.5	528	552	S11:Phosphorylation (STY):12.33	S538	PDNTFDSDNEENE	6946.52	6487.36	4447.78	5960.55	1745.47	4362.23	1718.36	2608.69	2.28489	0.0452033
A0A1S3CWV8	A0A1S3CWV8|A0A1S3CWV8_DIACI:A0A1S3CY43|A0A1S3CY43_DIACI	S	DSIPHNTS(+79.97)DTSLASEK	8	16	Uncharacterized protein LOC103506775 isoform X1 OS=Diaphorina citri OX=121845 GN=LOC103506775 PE=4 SV=1	Uncharacterized protein LOC103506775 isoform X1	LOC103506775	35.63	1780.75	2.5	123	138	S8:Phosphorylation (STY):12.28	S130	SIPHNTSDTSLAS	2548.76	2777.39	3670.83	2998.99	1567.2	756.987	1645.03	1323.07	2.26669	0.0196365
A0A3Q0JA09	A0A3Q0JA09|A0A3Q0JA09_DIACI	S	NIYSS(+79.97)DEDAS(+79.97)DLELR	5	15	Another transcription unit protein OS=Diaphorina citri OX=121845 GN=LOC103515227 PE=4 SV=1	Another transcription unit protein	LOC103515227	60.34	1885.7	7.5	656	670	S5:Phosphorylation (STY):10.11;S10:Phosphorylation (STY):95.35	S660	SRNIYSSDEDASD	2315.98	2144.96	1972.71	2144.55	682.467	1346.2	815.145	947.938	2.26233	0.0060797
A0A3Q0JA09	A0A3Q0JA09|A0A3Q0JA09_DIACI	S	NIYSS(+79.97)DEDAS(+79.97)DLELR	10	15	Another transcription unit protein OS=Diaphorina citri OX=121845 GN=LOC103515227 PE=4 SV=1	Another transcription unit protein	LOC103515227	60.34	1885.7	7.5	656	670	S5:Phosphorylation (STY):10.11;S10:Phosphorylation (STY):95.35	S665	SSDEDASDLELRT	2315.98	2144.96	1972.71	2144.55	682.467	1346.2	815.145	947.938	2.26233	0.0060797
A0A1S4EGG6	A0A1S4EGG6|A0A1S4EGG6_DIACI:A0A3Q0IYF2|A0A3Q0IYF2_DIACI	S	VGVTPQVPS(+79.97)NPGPR	9	14	Large proline-rich protein BAG6-like OS=Diaphorina citri OX=121845 GN=LOC103513252 PE=4 SV=2	Large proline-rich protein BAG6-like	LOC103513252	48.03	1483.72	-4	236	249	S9:Phosphorylation (STY):76.17	S244	VTPQVPSNPGPRG	2415.87	1946.98	2549.09	2303.98	408.45	1017.02	1682.14	1035.87	2.2242	0.0366397
A0A1S4END7	A0A1S4END7|A0A1S4END7_DIACI:A0A3Q0IV70|A0A3Q0IV70_DIACI	S	TTNVVSPGSGPRS(+79.97)PVTVIA	13	19	Uncharacterized protein LOC108253725 OS=Diaphorina citri OX=121845 GN=LOC108253725 PE=4 SV=1	Uncharacterized protein LOC108253725	LOC108253725	65.82	1917.96	9	93	111	S13:Phosphorylation (STY):16.51	S105	PGSGPRSPVTVIA	6069.92	4753.37	5300.84	5374.71	2153.96	2063.33	3084.44	2433.91	2.20826	0.00424637
A0A3Q0IPN2	A0A3Q0IPN2|A0A3Q0IPN2_DIACI	T	KGT(+79.97)WSPATTPEVQR	3	14	Uncharacterized protein LOC103507566 OS=Diaphorina citri OX=121845 GN=LOC103507566 PE=4 SV=1	Uncharacterized protein LOC103507566	LOC103507566	28.45	1636.76	5.9	132	145	T3:Phosphorylation (STY):14.04	T134	TVKKKGTWSPATT	1011.71	781.183	1090.33	961.073	607.831	382.225	316.963	435.673	2.20595	0.0147746
A0A3Q0IZK0	A0A3Q0IZK0|A0A3Q0IZK0_DIACI	S	WTPPTS(+79.97)DGGAPIEK	6	14	LOW QUALITY PROTEIN: twitchin-like OS=Diaphorina citri OX=121845 GN=LOC103512392 PE=4 SV=1	LOW QUALITY PROTEIN: twitchin-like	LOC103512392	32.67	1534.67	3	2538	2551	S6:Phosphorylation (STY):7.21	S2543	KWTPPTSDGGAPI	337.385	260.898	364.463	320.915	183.122	208.694	45.928	145.915	2.19934	0.0419047
A0A1S4EN41	A0A1S4EN41|A0A1S4EN41_DIACI	S	FSS(+79.97)PPPNAAEFVIHK	3	15	2-oxoglutarate dehydrogenase, mitochondrial-like OS=Diaphorina citri OX=121845 GN=LOC103519217 PE=3 SV=1	2-oxoglutarate dehydrogenase, mitochondrial-like	LOC103519217	71.44	1719.8	-4.6	135	149	S3:Phosphorylation (STY):0.00	S137	IGKRFSSPPPNAA	27826.8	42385.1	32668.1	34293.3	12883.7	14029.4	20219.5	15710.9	2.18278	0.0185837
A0A3Q0INZ4	A0A3Q0INZ4|A0A3Q0INZ4_DIACI	S	KAS(+79.97)VEKPPTPAAVK	3	14	Eukaryotic translation initiation factor 4 gamma 3-like OS=Diaphorina citri OX=121845 GN=LOC103524978 PE=4 SV=1	Eukaryotic translation initiation factor 4 gamma 3-like	LOC103524978	73.03	1501.79	0.7	295	308	S3:Phosphorylation (STY):112.31	S297	TPQKKASVEKPPT	151441	148925	109978	136781	47381.6	72180.1	69719.3	63093.7	2.16791	0.00908138
A0A3Q0JD23	A0A3Q0JD23|A0A3Q0JD23_DIACI	S	DKPS(+79.97)SLDDDITEPDKVDLK	4	19	Titin OS=Diaphorina citri OX=121845 GN=LOC103518851 PE=4 SV=1	Titin	LOC103518851	49.57	2209	-4.4	2541	2559	S4:Phosphorylation (STY):0.00	S2544	VKKDKPSSLDDDI	31065	27212.9	27537.5	28605.1	12409.7	13551.8	13687	13216.2	2.16441	0.000290073
A0A1S3D197	A0A1S3D197|A0A1S3D197_DIACI	S	SVS(+79.97)S(+79.97)DEEVPAK	3	11	Histone-lysine N-methyltransferase NSD3 OS=Diaphorina citri OX=121845 GN=LOC103509368 PE=4 SV=1	Histone-lysine N-methyltransferase NSD3	LOC103509368	50.92	1306.47	0.9	145	155	S3:Phosphorylation (STY):0.00;S4:Phosphorylation (STY):7.77	S147	SKRKSVSSDEEVP	3020.27	4052.14	3643.1	3571.84	2552.88	812.092	1619.3	1661.42	2.14987	0.0310189
A0A1S3D197	A0A1S3D197|A0A1S3D197_DIACI	S	SVS(+79.97)S(+79.97)DEEVPAK	4	11	Histone-lysine N-methyltransferase NSD3 OS=Diaphorina citri OX=121845 GN=LOC103509368 PE=4 SV=1	Histone-lysine N-methyltransferase NSD3	LOC103509368	50.92	1306.47	0.9	145	155	S3:Phosphorylation (STY):0.00;S4:Phosphorylation (STY):7.77	S148	KRKSVSSDEEVPA	3020.27	4052.14	3643.1	3571.84	2552.88	812.092	1619.3	1661.42	2.14987	0.0310189
A0A3Q0J646	A0A3Q0J646|A0A3Q0J646_DIACI	S	GYS(+79.97)SSEESQNLSK	3	13	Uncharacterized protein LOC103513086 OS=Diaphorina citri OX=121845 GN=LOC103513086 PE=3 SV=1	Uncharacterized protein LOC103513086	LOC103513086	46.03	1494.59	-4.7	153	165	S3:Phosphorylation (STY):0.00	S155	NEPRGYSSSEESQ	1088.7	1042.96	791.298	974.319	171.539	553.721	634.93	453.397	2.14893	0.0376172
A0A3Q0J267	A0A3Q0J267|A0A3Q0J267_DIACI	S	SS(+79.97)EDNFEDEVER	2	12	LOW QUALITY PROTEIN: transcription factor 25 OS=Diaphorina citri OX=121845 GN=LOC103511167 PE=3 SV=1	LOW QUALITY PROTEIN: transcription factor 25	LOC103511167	58.13	1534.55	-0.5	107	118	S2:Phosphorylation (STY):0.00	S108	AQNPRSSEDNFED	7097.75	4522.7	6272.58	5964.35	2428.1	2613.3	3292.58	2777.99	2.147	0.0165902
A0A1S3DG15	A0A1S3DG15|A0A1S3DG15_DIACI	S	KQS(+79.97)LQLTELQNHYDETQR	3	18	Paramyosin, short form-like OS=Diaphorina citri OX=121845 GN=LOC103517606 PE=4 SV=1	Paramyosin, short form-like	LOC103517606	30.12	2310.06	-4.7	19	36	S3:Phosphorylation (STY):4.73	S21	KTIKKQSLQLTEL	6443.63	3608.14	6681.67	5577.81	2948.82	2160.45	2808.22	2639.17	2.11347	0.0445391
A0A3Q0IUB3	A0A3Q0IUB3|A0A3Q0IUB3_DIACI	S	NS(+79.97)VGGGEVAMM(+15.99)R	2	12	Serine/arginine-rich splicing factor 5-like OS=Diaphorina citri OX=121845 GN=LOC113466600 PE=4 SV=1	Serine/arginine-rich splicing factor 5-like	LOC113466600	35.56	1302.51	-2.2	56	67	S2:Phosphorylation (STY):1000.00;M11:Oxidation (M):12.28	S57	SRIRRNSVGGGEV	982.007	814.153	859.545	885.235	369.95	658.981	237.277	422.069	2.09737	0.0260277
A0A1S3DSK2	A0A1S3DSK2|A0A1S3DSK2_DIACI	S	LIC(+57.02)TC(+57.02)TEQEEVNLS(+79.97)	14	14	Uncharacterized protein LOC103523114 OS=Diaphorina citri OX=121845 GN=LOC103523114 PE=4 SV=1	Uncharacterized protein LOC103523114	LOC103523114	60.88	1774.72	3.1	154	167	C3:Carbamidomethylation:1000.00;C5:Carbamidomethylation:1000.00;S14:Phosphorylation (STY):131.72	S167	QEEVNLS______	14472.8	16432.2	12963.7	14622.9	5981.03	8867.03	6085.85	6977.97	2.09558	0.00517554
A0A3Q0JLQ8	A0A3Q0JLQ8|A0A3Q0JLQ8_DIACI	S	TS(+79.97)PSSLPPVDENSTTPLPNSK	2	21	Oxysterol-binding protein OS=Diaphorina citri OX=121845 GN=LOC103519780 PE=3 SV=1	Oxysterol-binding protein	LOC103519780	30.63	2247.03	-2.5	233	253	S2:Phosphorylation (STY):0.00	S234	NLPPRTSPSSLPP	3154.51	3874.2	2700.32	3243.01	1882.77	1713.58	1047.21	1547.85	2.09517	0.0164655
A0A3Q0IZK0	A0A3Q0IZK0|A0A3Q0IZK0_DIACI	S	SEPLTTTAS(+79.97)IEAK	9	13	LOW QUALITY PROTEIN: twitchin-like OS=Diaphorina citri OX=121845 GN=LOC103512392 PE=4 SV=1	LOW QUALITY PROTEIN: twitchin-like	LOC103512392	60.71	1426.66	-0.4	4129	4141	S9:Phosphorylation (STY):0.00	S4137	PLTTTASIEAKNP	14430.6	16278.5	11053.9	13921	7671.96	4627.8	7658.17	6652.65	2.09255	0.0166434
A0A1S3DHN3	A0A1S3DHN3|A0A1S3DHN3_DIACI	S	KKS(+79.97)SLVPDDINAK	3	13	Conserved oligomeric Golgi complex subunit 3 OS=Diaphorina citri OX=121845 GN=LOC103517909 PE=3 SV=2	Conserved oligomeric Golgi complex subunit 3	LOC103517909	44.36	1493.75	-0.8	57	69	S3:Phosphorylation (STY):0.00	S59	EEEKKKSSLVPDD		243.908	290.814	267.361	78.8665	182.17	123.447	128.161	2.08613	0.0462973
A0A1S4EFY6	A0A1S4EFY6|A0A1S4EFY6_DIACI	T	DMM(+15.99)ANT(+79.97)KEFIEHR	6	13	Uncharacterized protein LOC108252814 OS=Diaphorina citri OX=121845 GN=LOC108252814 PE=4 SV=1	Uncharacterized protein LOC108252814	LOC108252814	61.05	1716.7	0.3	1186	1198	M3:Oxidation (M):17.01;T6:Phosphorylation (STY):1000.00	T1191	KDMMANTKEFIEH	4273.49	5513.75	4781.94	4856.4	3067.01	2514.33	1430.92	2337.42	2.07767	0.0137443
A0A3Q0IVH9	A0A3Q0IVH9|A0A3Q0IVH9_DIACI	S	AIDPNDIES(+79.97)PR	9	11	Protein RIC1 homolog OS=Diaphorina citri OX=121845 GN=LOC103508212 PE=4 SV=1	Protein RIC1 homolog	LOC103508212	53.14	1305.56	2.9	1031	1041		S1039	DPNDIESPRTSVI	4289.44	3055.54	3060.11	3468.37	1876.83	2123.73	1022.95	1674.5	2.07128	0.0274902
A0A3Q0JGS7	A0A3Q0JGS7|A0A3Q0JGS7_DIACI:A0A1S3DLT7|A0A1S3DLT7_DIACI	T	ISLT(+79.97)TQLEDTKR	4	12	Myosin heavy chain, muscle-like OS=Diaphorina citri OX=121845 GN=LOC103520899 PE=4 SV=1	Myosin heavy chain, muscle-like	LOC103520899	55.47	1483.73	2.7	266	277	T4:Phosphorylation (STY):9.40	T269	KIKISLTTQLEDT	856.77	726.285	554.057	712.371	349.444	256.132	429.514	345.03	2.06466	0.0220002
A0A3Q0JB91	A0A3Q0JB91|A0A3Q0JB91_DIACI	S	E(+42.01)KVENQVDKS(+79.97)DGDEM(+15.99)EDEEVEGGNLAQEVLK	10	31	Nucleosome assembly protein 1-like 1 OS=Diaphorina citri OX=121845 GN=LOC103518088 PE=3 SV=1	Nucleosome assembly protein 1-like 1	LOC103518088	64.74	3599.53	5.1	6	36		S15	ENQVDKSDGDEME	7600.4	8248.79	5775.84	7208.34	1922.59	3350.26	5212.98	3495.27	2.06231	0.0370154
A0A3Q0J9E1	A0A3Q0J9E1|A0A3Q0J9E1_DIACI	S	ISVESNVSDS(+79.97)GVR	10	13	Uncharacterized protein LOC103517085 OS=Diaphorina citri OX=121845 GN=LOC103517085 PE=4 SV=1	Uncharacterized protein LOC103517085	LOC103517085	40.95	1427.63	1.8	757	769	S10:Phosphorylation (STY):0.00	S766	ESNVSDSGVRKIS	1270.38	1995.52	2021.15	1762.35	784.339	590.64	1194.8	856.593	2.0574	0.0406753
A0A3Q0J360	A0A3Q0J360|A0A3Q0J360_DIACI:A0A1S3DFE9|A0A1S3DFE9_DIACI	T	VPVEGAPTPAT(+79.97)PDTEAPTPAPGTESGPSSTTPGPETK	11	37	26S proteasome non-ATPase regulatory subunit 1-like OS=Diaphorina citri OX=121845 GN=LOC103513957 PE=4 SV=1	26S proteasome non-ATPase regulatory subunit 1-like	LOC103513957	75.4	3607.65	-0.6	141	177	T11:Phosphorylation (STY):29.32	T151	GAPTPATPDTEAP	12755.3	20981.5	16117.3	16618	7766.45	6884.26	9648.33	8099.68	2.05169	0.0278865
A0A3Q0IJL7	A0A3Q0IJL7|A0A3Q0IJL7_DIACI	T	ADT(+79.97)PERS(+79.97)PVSPTR	3	13	Dentin sialophosphoprotein-like OS=Diaphorina citri OX=121845 GN=LOC103505284 PE=4 SV=1	Dentin sialophosphoprotein-like	LOC103505284	32.76	1571.64	-3.2	332	344	T3:Phosphorylation (STY):20.76;S7:Phosphorylation (STY):28.36	T334	SSLRADTPERSPV	4469.3	4655.46	3536.42	4220.39	1520.69	2590.85	2062.63	2058.06	2.05067	0.00958702
A0A3Q0IJL7	A0A3Q0IJL7|A0A3Q0IJL7_DIACI	S	ADT(+79.97)PERS(+79.97)PVSPTR	7	13	Dentin sialophosphoprotein-like OS=Diaphorina citri OX=121845 GN=LOC103505284 PE=4 SV=1	Dentin sialophosphoprotein-like	LOC103505284	32.76	1571.64	-3.2	332	344	T3:Phosphorylation (STY):20.76;S7:Phosphorylation (STY):28.36	S338	ADTPERSPVSPTR	4469.3	4655.46	3536.42	4220.39	1520.69	2590.85	2062.63	2058.06	2.05067	0.00958702
A0A1S3D1R2	A0A1S3D1R2|A0A1S3D1R2_DIACI	S	S(+79.97)ASGDEAPEGLTK	1	13	Protein kinase C-binding protein 1-like OS=Diaphorina citri OX=121845 GN=LOC103508756 PE=4 SV=1	Protein kinase C-binding protein 1-like	LOC103508756	53.39	1340.55	14.1	1108	1120	S1:Phosphorylation (STY):0.00	S1108	EVAEEKSASGDEA	389.692	546.271	623.319	519.761	205.887	285.526	269.245	253.553	2.04991	0.021738
A0A3Q0IXA3	A0A3Q0IXA3|A0A3Q0IXA3_DIACI	S	LNS(+79.97)LSTESDGAM(+15.99)DTVAPVTK	3	20	Ribosome-binding protein 1-like OS=Diaphorina citri OX=121845 GN=LOC113465340 PE=4 SV=1	Ribosome-binding protein 1-like	LOC113465340	56.83	2130.94	-0.5	78	97	S3:Phosphorylation (STY):0.00;M12:Oxidation (M):1000.00	S80	EDKRLNSLSTESD	3751.49	4464.32	4858.14	4357.98	2023.76	2632.86	1747.8	2134.81	2.04139	0.00592025
A0A1S3D2Q9	A0A1S3D2Q9|A0A1S3D2Q9_DIACI:A0A3Q0IV56|A0A3Q0IV56_DIACI	T	EM(+15.99)GTGDAQTATPSGIPST(+79.97)PTANR	18	23	Metal transporter CNNM4-like OS=Diaphorina citri OX=121845 GN=LOC103510268 PE=4 SV=1	Metal transporter CNNM4-like	LOC103510268	30.27	2355	0.9	65	87	M2:Oxidation (M):1000.00;T18:Phosphorylation (STY):17.01	T82	PSGIPSTPTANRL	530.407	528.572	399.906	486.295	304.412	227.91	183.308	238.543	2.0386	0.0113518
A0A3Q0J807	A0A3Q0J807|A0A3Q0J807_DIACI	S	SNS(+79.97)SDIDNDTSDLASR	3	16	Probable serine/threonine-protein kinase MARK-A OS=Diaphorina citri OX=121845 GN=LOC103516748 PE=4 SV=1	Probable serine/threonine-protein kinase MARK-A	LOC103516748	62.63	1775.68	-2.9	853	868	S3:Phosphorylation (STY):0.00	S855	TRNRSNSSDIDND	933.75	655.502	459.941	683.064	1293.06	1522.84	1289.25	1368.38	0.499177	0.0121933
A0A1S4ERX3	A0A1S4ERX3|A0A1S4ERX3_DIACI:A0A3Q0ITS6|A0A3Q0ITS6_DIACI	S	TAS(+79.97)VISDELIR	3	11	Anoctamin OS=Diaphorina citri OX=121845 GN=LOC103524104 PE=3 SV=1	Anoctamin	LOC103524104	49.82	1282.62	-0.5	733	743	S3:Phosphorylation (STY):11.10	S735	TLKKTASVISDEL	590.426	528.871	349.431	489.576	1109.89	992.886	840.35	981.041	0.499037	0.00987948
A0A3Q0IUT6	A0A3Q0IUT6|A0A3Q0IUT6_DIACI	T	GLRT(+79.97)PSFLK	4	9	Protein hu-li tai shao OS=Diaphorina citri OX=121845 GN=LOC103507470 PE=3 SV=1	Protein hu-li tai shao	LOC103507470	32.52	1097.56	-4.5	551	559	T4:Phosphorylation (STY):26.31	T554	KKKGLRTPSFLKK	212.509	442.845	441.819	365.725	734.984	792.266	682.288	736.513	0.496562	0.0110652
A0A3Q0JG17	A0A3Q0JG17|A0A3Q0JG17_DIACI	S	S(+79.97)DSLGEDGETFGSTSC(+57.02)FR	1	18	inositol-polyphosphate 5-phosphatase OS=Diaphorina citri OX=121845 GN=LOC103518378 PE=3 SV=1	inositol-polyphosphate 5-phosphatase	LOC103518378	48.31	2030.76	-0.5	566	583	S1:Phosphorylation (STY):0.00;C16:Carbamidomethylation:1000.00	S566	GKVSRRSDSLGED	2229	3010.97	2487.7	2575.89	4078.06	6198.15	5314.06	5196.76	0.495673	0.01623
A0A3Q0JG17	A0A3Q0JG17|A0A3Q0JG17_DIACI	S	SDS(+79.97)LGEDGETFGSTSC(+57.02)FR	3	18	inositol-polyphosphate 5-phosphatase OS=Diaphorina citri OX=121845 GN=LOC103518378 PE=3 SV=1	inositol-polyphosphate 5-phosphatase	LOC103518378	57.21	2030.76	1	566	583	S3:Phosphorylation (STY):0.00;C16:Carbamidomethylation:1000.00	S568	VSRRSDSLGEDGE	2229	3010.97	2487.7	2575.89	4078.06	6198.15	5314.06	5196.76	0.495673	0.01623
A0A3Q0J7P5	A0A3Q0J7P5|A0A3Q0J7P5_DIACI:A0A1S3DD98|A0A1S3DD98_DIACI:A0A1S3DCX8|A0A1S3DCX8_DIACI:A0A1S3DGP9|A0A1S3DGP9_DIACI	S	LGES(+79.97)QTLQQFSR	4	12	Spectrin alpha chain-like OS=Diaphorina citri OX=121845 GN=LOC103516244 PE=4 SV=1	Spectrin alpha chain-like	LOC103516244	52.68	1472.67	6.6	1115	1126	S4:Phosphorylation (STY):32.28	S1118	RSRLGESQTLQQF	6840.7	7197.11	5384.7	6474.17	12219.2	12655.9	14351.6	13075.5	0.495136	0.00151202
A0A3Q0IV53	A0A3Q0IV53|A0A3Q0IV53_DIACI	T	IEITHC(+57.02)GT(+79.97)M(+15.99)K	8	10	Protein argonaute-2 OS=Diaphorina citri OX=121845 GN=LOC103507599 PE=3 SV=1	Protein argonaute-2	LOC103507599	25.51	1284.52	9.2	296	305	C6:Carbamidomethylation:1000.00;T8:Phosphorylation (STY):5.55;M9:Oxidation (M):1000.00	T303	EITHCGTMKRKYR	286.625	158.459	242.589	229.224	421.758	413.59	554.456	463.268	0.494798	0.016716
A0A3Q0J2J6	A0A3Q0J2J6|A0A3Q0J2J6_DIACI	S	GHEGSLGIWS(+79.97)SQR	10	13	Uncharacterized protein LOC103513717 isoform X1 OS=Diaphorina citri OX=121845 GN=LOC103513717 PE=4 SV=1	Uncharacterized protein LOC103513717 isoform X1	LOC103513717	44.52	1492.65	0.2	194	206	S10:Phosphorylation (STY):0.00	S203	GSLGIWSSQRMLK	293.443	133.714	156.545	194.567	329.471	392.599	458.65	393.573	0.494361	0.0330412
A0A3Q0JB86	A0A3Q0JB86|A0A3Q0JB86_DIACI	S	RAS(+79.97)M(+15.99)DFAADDKK	3	12	RING finger protein 207 OS=Diaphorina citri OX=121845 GN=LOC113470041 PE=4 SV=1	RING finger protein 207	LOC113470041	43.25	1449.6	4.6	1086	1097		S1088	TLVRRASMDFAAD	135.216	119.32		127.268	280.385		235.615	258	0.493288	0.0314653
A0A3Q0J9M3	A0A3Q0J9M3|A0A3Q0J9M3_DIACI:A0A1S3DE13|A0A1S3DE13_DIACI	S	ANS(+79.97)VQVPSTPASPFAK	3	16	Smoothelin-like protein 1 OS=Diaphorina citri OX=121845 GN=LOC108253423 PE=4 SV=1	Smoothelin-like protein 1	LOC108253423	64.26	1679.79	2.5	120	135	S3:Phosphorylation (STY):77.53	S122	RLTKANSVQVPST	4934.71	4590.72	4904.59	4810.01	7044.13	10944.6	11324.5	9771.08	0.49227	0.0224533
A0A3Q0IRV1	A0A3Q0IRV1|A0A3Q0IRV1_DIACI	T	EHLDET(+79.97)PPRPTPALR	6	15	Uncharacterized protein LOC103506515 OS=Diaphorina citri OX=121845 GN=LOC103506515 PE=4 SV=1	Uncharacterized protein LOC103506515	LOC103506515	47.63	1807.86	-7.5	719	733	T6:Phosphorylation (STY):23.70	T724	KEHLDETPPRPTP	1626.21	2176.79	3258.38	2353.79	6035.58	4597.89	3741.69	4791.72	0.491221	0.0414964
A0A3Q0JK19	A0A3Q0JK19|A0A3Q0JK19_DIACI	S	LATTDVKS(+79.97)AVDILLS(+79.97)IK	8	17	E3 ubiquitin-protein ligase MYCBP2-like OS=Diaphorina citri OX=121845 GN=LOC103520673 PE=4 SV=1	E3 ubiquitin-protein ligase MYCBP2-like	LOC103520673	27.85	1945.98	-9.8	1404	1420	S8:Phosphorylation (STY):0.00;S15:Phosphorylation (STY):10.83	S1411	ATTDVKSAVDILL	766.555	522.11	1076.9	788.523	1622.62	1402.67	1790.44	1605.24	0.491218	0.0140418
A0A3Q0JK19	A0A3Q0JK19|A0A3Q0JK19_DIACI	S	LATTDVKS(+79.97)AVDILLS(+79.97)IK	15	17	E3 ubiquitin-protein ligase MYCBP2-like OS=Diaphorina citri OX=121845 GN=LOC103520673 PE=4 SV=1	E3 ubiquitin-protein ligase MYCBP2-like	LOC103520673	27.85	1945.98	-9.8	1404	1420	S8:Phosphorylation (STY):0.00;S15:Phosphorylation (STY):10.83	S1418	AVDILLSIKELLP	766.555	522.11	1076.9	788.523	1622.62	1402.67	1790.44	1605.24	0.491218	0.0140418
A0A3Q0J919	A0A3Q0J919|A0A3Q0J919_DIACI	T	VKPPSPPLSSSPPT(+79.97)S(+79.97)LVVTEESLQVSPTK	14	29	Tyrosine-protein kinase OS=Diaphorina citri OX=121845 GN=LOC103516918 PE=3 SV=1	Tyrosine-protein kinase	LOC103516918	53.95	3147.54	3.3	1084	1112	T14:Phosphorylation (STY):0.00;S15:Phosphorylation (STY):0.00	T1097	LSSSPPTSLVVTE	9263.14	7188.81	7139.1	7863.68	14358.7	17639.8	16071.5	16023.4	0.490764	0.00227986
A0A3Q0J919	A0A3Q0J919|A0A3Q0J919_DIACI	S	VKPPSPPLSSSPPT(+79.97)S(+79.97)LVVTEESLQVSPTK	15	29	Tyrosine-protein kinase OS=Diaphorina citri OX=121845 GN=LOC103516918 PE=3 SV=1	Tyrosine-protein kinase	LOC103516918	53.95	3147.54	3.3	1084	1112	T14:Phosphorylation (STY):0.00;S15:Phosphorylation (STY):0.00	S1098	SSSPPTSLVVTEE	9263.14	7188.81	7139.1	7863.68	14358.7	17639.8	16071.5	16023.4	0.490764	0.00227986
A0A3Q0J7S0	A0A3Q0J7S0|A0A3Q0J7S0_DIACI:A0A1S3DD98|A0A1S3DD98_DIACI	S	KM(+15.99)EAGLTAS(+79.97)QQNLADGSSIAAR	9	22	Spectrin alpha chain OS=Diaphorina citri OX=121845 GN=LOC103516243 PE=4 SV=1	Spectrin alpha chain	LOC103516243	72.46	2314.06	-5.9	95	116	M2:Oxidation (M):1000.00;S9:Phosphorylation (STY):15.73	S103	EAGLTASQQNLAD	39237.3	50173.5	62759.8	50723.5	75815.1	108251	128509	104192	0.486829	0.033352
A0A3Q0IPJ2	A0A3Q0IPJ2|A0A3Q0IPJ2_DIACI	S	AGIYGFDS(+79.97)DDENEVDRK	8	17	LOW QUALITY PROTEIN: obscurin-like OS=Diaphorina citri OX=121845 GN=LOC103507575 PE=3 SV=1	LOW QUALITY PROTEIN: obscurin-like	LOC103507575	41.45	2008.81	3	1302	1318	S8:Phosphorylation (STY):16.51	S1309	GIYGFDSDDENEV	4233.18	6663.38	4600.2	5165.59	11375.5	11663.3	8811.79	10616.9	0.486545	0.00989738
A0A3Q0ITU5	A0A3Q0ITU5|A0A3Q0ITU5_DIACI	S	LPSPPKS(+79.97)PVEK	7	11	Muscle M-line assembly protein unc-89-like OS=Diaphorina citri OX=121845 GN=LOC113467622 PE=4 SV=1	Muscle M-line assembly protein unc-89-like	LOC113467622	53.83	1257.64	-4.1	181	191	S7:Phosphorylation (STY):31.27	S187	LPSPPKSPVEKSK	2040.75	1248.6	3150.3	2146.55	4918.5	4761.97	3565.94	4415.47	0.486144	0.031302
A0A3Q0JCF8	A0A3Q0JCF8|A0A3Q0JCF8_DIACI	S	S(+79.97)LDSINNNNNKI	1	12	Uncharacterized protein LOC103518564 OS=Diaphorina citri OX=121845 GN=LOC103518564 PE=4 SV=1	Uncharacterized protein LOC103518564	LOC103518564	45.96	1424.63	1.2	2872	2883	S1:Phosphorylation (STY):18.00	S2872	KVEKKKSLDSINN	558.22	367.712	336.604	420.845	678.05	810.164	1109.81	866.007	0.48596	0.0375231
A0A3Q0JBI3	A0A3Q0JBI3|A0A3Q0JBI3_DIACI	S	VLVIPEGS(+79.97)ENNISSSR	8	16	non-specific serine/threonine protein kinase OS=Diaphorina citri OX=121845 GN=LOC103522428 PE=3 SV=1	non-specific serine/threonine protein kinase	LOC103522428	68.1	1779.84	2.2	582	597	S8:Phosphorylation (STY):24.47	S589	LVIPEGSENNISS	4008.07	5683.23	3629.64	4440.31	8150.17	10997.5	8286.82	9144.83	0.485555	0.0137534
A0A1S3DQK6	A0A1S3DQK6|A0A1S3DQK6_DIACI	S	DYPPQIIHSVS(+79.97)LK	11	13	Eukaryotic translation initiation factor 4 gamma 3-like OS=Diaphorina citri OX=121845 GN=LOC103522671 PE=4 SV=1	Eukaryotic translation initiation factor 4 gamma 3-like	LOC103522671	61.93	1575.77	4.3	38	50	S11:Phosphorylation (STY):5.99	S48	QIIHSVSLKEEVK	950.854	497.293	935.185	794.444	1826.06	1652.75	1437.93	1638.91	0.484738	0.0105487
A0A1S3DI91	A0A1S3DI91|A0A1S3DI91_DIACI	S	NS(+79.97)VGGEDNLGLTVGNETR	2	18	Cadherin-3 OS=Diaphorina citri OX=121845 GN=LOC103519204 PE=4 SV=1	Cadherin-3	LOC103519204	50.53	1910.84	-1.8	729	746	S2:Phosphorylation (STY):32.22	S730	SNSRRNSVGGEDN	291.421	139.705	108.191	179.773	403.998	382.235	329.582	371.938	0.48334	0.03403
A0A3Q0INM2	A0A3Q0INM2|A0A3Q0INM2_DIACI	T	IIYPPSSNPT(+79.97)S(+79.97)PTM(+15.99)GR	10	16	Proteoglycan 4 OS=Diaphorina citri OX=121845 GN=LOC103524819 PE=4 SV=1	Proteoglycan 4	LOC103524819	34.3	1892.78	3.5	235	250	T10:Phosphorylation (STY):0.00;S11:Phosphorylation (STY):0.00;M14:Oxidation (M):1000.00	T244	PPSSNPTSPTMGR	452.862	794.208	1245.42	830.829	1336.66	1719.48	2101.9	1719.35	0.483224	0.0493537
A0A3Q0INM2	A0A3Q0INM2|A0A3Q0INM2_DIACI	S	IIYPPSSNPT(+79.97)S(+79.97)PTM(+15.99)GR	11	16	Proteoglycan 4 OS=Diaphorina citri OX=121845 GN=LOC103524819 PE=4 SV=1	Proteoglycan 4	LOC103524819	34.3	1892.78	3.5	235	250	T10:Phosphorylation (STY):0.00;S11:Phosphorylation (STY):0.00;M14:Oxidation (M):1000.00	S245	PSSNPTSPTMGRR	452.862	794.208	1245.42	830.829	1336.66	1719.48	2101.9	1719.35	0.483224	0.0493537
A0A3Q0JGS7	A0A3Q0JGS7|A0A3Q0JGS7_DIACI:A0A3Q0IZQ4|A0A3Q0IZQ4_DIACI:A0A3Q0JM39|A0A3Q0JM39_DIACI:A0A1S3DU13|A0A1S3DU13_DIACI	S	KKHNDAVS(+79.97)EMGEQIDQLNK	8	19	Myosin heavy chain, muscle-like OS=Diaphorina citri OX=121845 GN=LOC103520899 PE=4 SV=1	Myosin heavy chain, muscle-like	LOC103520899	53.86	2263.03	1.6	154	172		S161	KHNDAVSEMGEQI		120.182	81.9571	101.07	206.375	214.559		210.467	0.480216	0.0304705
A0A1S3DJ24	A0A1S3DJ24|A0A1S3DJ24_DIACI	S	SSSS(+79.97)LGGTLVRPK	4	13	Uncharacterized protein LOC103518694 OS=Diaphorina citri OX=121845 GN=LOC103518694 PE=4 SV=1	Uncharacterized protein LOC103518694	LOC103518694	49.75	1367.68	0.3	325	337	S4:Phosphorylation (STY):0.00	S328	RGRSSSSLGGTLV	887.06	1391.13	1264.13	1180.77	2340.44	2752.31	2284.51	2459.08	0.480168	0.00376964
A0A3Q0IPJ2	A0A3Q0IPJ2|A0A3Q0IPJ2_DIACI	S	TSTAELNDSKLS(+79.97)R	12	13	LOW QUALITY PROTEIN: obscurin-like OS=Diaphorina citri OX=121845 GN=LOC103507575 PE=3 SV=1	LOW QUALITY PROTEIN: obscurin-like	LOC103507575	57.39	1500.68	-2.5	2513	2525	S12:Phosphorylation (STY):13.38	S2524	LNDSKLSRQTSKV	7547.52	4331.57	4697.45	5525.51	10561.5	12629.9	11331.8	11507.8	0.480155	0.00717868
Q0PXV8	Q0PXV8|Q0PXV8_DIACI	S	ELQTENVDAS(+79.97)AD	10	12	Large ribosomal subunit protein eL31 OS=Diaphorina citri OX=121845 PE=2 SV=1	Large ribosomal subunit protein eL31		38.71	1370.52	-4.5	111	122	S10:Phosphorylation (STY):17.08	S120	TENVDASAD____	571.375	595.13	695.448	620.651	1562.71	1043.81	1272.78	1293.1	0.479972	0.0122355
A0A3Q0J5F8	A0A3Q0J5F8|A0A3Q0J5F8_DIACI	T	T(+79.97)NSFGSIIASTSR	1	13	Potassium voltage-gated channel protein eag-like OS=Diaphorina citri OX=121845 GN=LOC113468878 PE=4 SV=1	Potassium voltage-gated channel protein eag-like	LOC113468878	53.39	1419.64	-1.6	299	311	T1:Phosphorylation (STY):0.00	T299	LKPILRTNSFGSI	598.549	413.354	493.417	501.774	1091.4	981.987	1070.31	1047.9	0.478839	0.000988465
A0A1S3D794	A0A1S3D794|A0A1S3D794_DIACI	S	LS(+79.97)AHALSTLAK	2	11	Serine/arginine repetitive matrix protein 2-like isoform X1 OS=Diaphorina citri OX=121845 GN=LOC103512795 PE=4 SV=1	Serine/arginine repetitive matrix protein 2-like isoform X1	LOC103512795	59.22	1190.61	-3.7	727	737	S2:Phosphorylation (STY):96.93	S728	EASIRLSAHALST	1774.62	4522.19	5512.68	3936.5	8127.09	7215.85	9342.38	8228.44	0.478401	0.0282492
A0A3Q0II33	A0A3Q0II33|A0A3Q0II33_DIACI	S	TVSGGES(+79.97)IDENSEIAAAAER	7	20	Dentin sialophosphoprotein-like OS=Diaphorina citri OX=121845 GN=LOC113465496 PE=4 SV=1	Dentin sialophosphoprotein-like	LOC113465496	51.43	2084.89	4.6	330	349	S7:Phosphorylation (STY):6.65	S336	TVSGGESIDENSE	237.151	511.414	551.531	433.365	1065.69	869.056	792.751	909.165	0.476663	0.0204949
A0A1S3DBI6	A0A1S3DBI6|A0A1S3DBI6_DIACI:A0A1S3DBA0|A0A1S3DBA0_DIACI:A0A1S3DBH7|A0A1S3DBH7_DIACI	S	YQTYMEESEANS(+79.97)PAGMR	12	17	Formin-binding protein 1-like isoform X1 OS=Diaphorina citri OX=121845 GN=LOC103515191 PE=4 SV=1	Formin-binding protein 1-like isoform X1	LOC103515191	79.56	2042.78	0	431	447	S12:Phosphorylation (STY):38.26	S442	EESEANSPAGMRK	5233.5	4624.05	5881.72	5246.42	8001.68	14040.8	10986.6	11009.7	0.476528	0.0317845
A0A3Q0J6E1	A0A3Q0J6E1|A0A3Q0J6E1_DIACI	S	S(+79.97)C(+57.02)IDSANYLSNDVASSAK	1	18	Uncharacterized protein LOC103515543 OS=Diaphorina citri OX=121845 GN=LOC103515543 PE=4 SV=1	Uncharacterized protein LOC103515543	LOC103515543	32.16	1980.81	0.1	1469	1486	S1:Phosphorylation (STY):4.73;C2:Carbamidomethylation:1000.00	S1469	GHIRPRSCIDSAN	206.191	280.466	317.411	268.023	485.557	639.228	563.174	562.653	0.476356	0.00590196
A0A3Q0JP13	A0A3Q0JP13|A0A3Q0JP13_DIACI	S	AAHLGLTNS(+79.97)QIK	9	12	Dynein intermediate chain 2, axonemal-like OS=Diaphorina citri OX=121845 GN=LOC103522902 PE=4 SV=1	Dynein intermediate chain 2, axonemal-like	LOC103522902	73.34	1331.66	-1.9	396	407	S9:Phosphorylation (STY):4.64	S404	HLGLTNSQIKVKV	5044.31	5425.73	4076.47	4848.84	8221.99	9990.71	12377.2	10196.6	0.475534	0.0135451
A0A3Q0IYQ3	A0A3Q0IYQ3|A0A3Q0IYQ3_DIACI	S	VAQALAHS(+79.97)QEELR	8	13	Liprin-alpha-1-like OS=Diaphorina citri OX=121845 GN=LOC103512090 PE=4 SV=1	Liprin-alpha-1-like	LOC103512090	62.36	1530.72	3.1	381	393		S388	AQALAHSQEELRR	2751.6	1694.77	2779.6	2408.66	5406.99	5791.76	4009.18	5069.31	0.475145	0.0148329
A0A1S4EA97	A0A1S4EA97|A0A1S4EA97_DIACI	S	TS(+79.97)AS(+79.97)TPDGDVSFVSNK	2	16	Microtubule-associated protein OS=Diaphorina citri OX=121845 GN=LOC103508001 PE=4 SV=2	Microtubule-associated protein	LOC103508001	25.21	1770.67	-0.3	763	778	S2:Phosphorylation (STY):0.00;S4:Phosphorylation (STY):0.00	S764	GGTVKTSASTPDG	2533.67	2069.53	3416.02	2673.07	5657.07	5439.27	5788.04	5628.13	0.474949	0.00192491
A0A1S4EA97	A0A1S4EA97|A0A1S4EA97_DIACI	S	TS(+79.97)AS(+79.97)TPDGDVSFVSNK	4	16	Microtubule-associated protein OS=Diaphorina citri OX=121845 GN=LOC103508001 PE=4 SV=2	Microtubule-associated protein	LOC103508001	25.21	1770.67	-0.3	763	778	S2:Phosphorylation (STY):0.00;S4:Phosphorylation (STY):0.00	S766	TVKTSASTPDGDV	2533.67	2069.53	3416.02	2673.07	5657.07	5439.27	5788.04	5628.13	0.474949	0.00192491
A0A3Q0J8U2	A0A3Q0J8U2|A0A3Q0J8U2_DIACI	S	DEPGVFKTPS(+79.97)GR	10	12	Collagen alpha-1(III) chain-like OS=Diaphorina citri OX=121845 GN=LOC103516806 PE=4 SV=1	Collagen alpha-1(III) chain-like	LOC103516806	31.89	1368.61	-13.1	237	248	S10:Phosphorylation (STY):14.04	S246	GVFKTPSGRRVDG	138.84	103.607	82.432	108.293	238.517	221.03	224.594	228.047	0.474871	0.00228323
A0A3Q0JDW0	A0A3Q0JDW0|A0A3Q0JDW0_DIACI	T	AAQVVEET(+79.97)DDERDDIDDEIIVTHL	8	24	UNC93-like protein OS=Diaphorina citri OX=121845 GN=LOC103519288 PE=3 SV=1	UNC93-like protein	LOC103519288	44.7	2819.24	-4	220	243	T8:Phosphorylation (STY):50.91	T227	AQVVEETDDERDD	160.032	216.493	169.12	181.882	343.35	419.86	387.509	383.573	0.474177	0.00203566
A0A1S4EH09	A0A1S4EH09|A0A1S4EH09_DIACI	T	VADPEHDHTGFLT(+79.97)EYVATR	13	19	mitogen-activated protein kinase OS=Diaphorina citri OX=121845 GN=LOC103513749 PE=4 SV=1	mitogen-activated protein kinase	LOC103513749	32.86	2236.98	-0.3	54	72	T13:Phosphorylation (STY):0.00	T66	DHTGFLTEYVATR	364.053	1318.76	746.791	809.869	1972.15	1706.59	1450.04	1709.59	0.473721	0.0464014
A0A3Q0IN52	A0A3Q0IN52|A0A3Q0IN52_DIACI	Y	Y(+79.97)KKS(+79.97)ETIDEIVNIKPR	1	16	LOW QUALITY PROTEIN: titin OS=Diaphorina citri OX=121845 GN=LOC103524768 PE=4 SV=1	LOW QUALITY PROTEIN: titin	LOC103524768	52.47	2092	-3.2	1429	1444	Y1:Phosphorylation (STY):0.00;S4:Phosphorylation (STY):0.00	Y1429	LEDSSRYKKSETI	3797.2	5548.17	4626.61	4657.33	8151.99	9530.36	11865.1	9849.15	0.472866	0.0122383
A0A3Q0IN52	A0A3Q0IN52|A0A3Q0IN52_DIACI	S	Y(+79.97)KKS(+79.97)ETIDEIVNIKPR	4	16	LOW QUALITY PROTEIN: titin OS=Diaphorina citri OX=121845 GN=LOC103524768 PE=4 SV=1	LOW QUALITY PROTEIN: titin	LOC103524768	52.47	2092	-3.2	1429	1444	Y1:Phosphorylation (STY):0.00;S4:Phosphorylation (STY):0.00	S1432	SSRYKKSETIDEI	3797.2	5548.17	4626.61	4657.33	8151.99	9530.36	11865.1	9849.15	0.472866	0.0122383
A0A3Q0J5R5	A0A3Q0J5R5|A0A3Q0J5R5_DIACI:A0A3Q0J0R2|A0A3Q0J0R2_DIACI	T	T(+79.97)SPSSQVEDSEFDM(+15.99)FAQSR	1	19	TOM1-like protein 2 isoform X1 OS=Diaphorina citri OX=121845 GN=LOC103512928 PE=3 SV=1	TOM1-like protein 2 isoform X1	LOC103512928	29.2	2242.87	-3.1	349	367	T1:Phosphorylation (STY):0.00;M14:Oxidation (M):1000.00	T349	SQPPAKTSPSSQV	978.786	1446.63	839.364	1088.26	2086.08	1784.13	3051.97	2307.39	0.471641	0.0452797
A0A3Q0IZY7	A0A3Q0IZY7|A0A3Q0IZY7_DIACI	S	HTGDS(+79.97)PALLKK	5	11	Probable elongation factor 1-delta OS=Diaphorina citri OX=121845 GN=LOC103512639 PE=3 SV=1	Probable elongation factor 1-delta	LOC103512639	58.63	1245.61	-1.3	236	246	S5:Phosphorylation (STY):40.63	S240	AKHTGDSPALLKK	136.032	271.833	242.54	216.802		426.482	497.452	461.967	0.469301	0.025877
A0A3Q0IPM2	A0A3Q0IPM2|A0A3Q0IPM2_DIACI	S	S(+79.97)GSRESITSNFSNVTTTSVK	1	20	Uncharacterized protein LOC113466723 isoform X1 OS=Diaphorina citri OX=121845 GN=LOC113466723 PE=4 SV=1	Uncharacterized protein LOC113466723 isoform X1	LOC113466723	45.88	2181	8.7	18	37	S1:Phosphorylation (STY):0.00	S18	HHGLRRSGSRESI	3724.8	16925.9	13877.5	11509.4	20520.2	26597.2	26473.3	24530.2	0.469192	0.043438
A0A3Q0IW21	A0A3Q0IW21|A0A3Q0IW21_DIACI	S	S(+79.97)FTDGDDFSSDLPMK	1	15	Dynein regulatory complex protein 11-like OS=Diaphorina citri OX=121845 GN=LOC103510646 PE=4 SV=1	Dynein regulatory complex protein 11-like	LOC103510646	46.53	1740.66	7.4	747	761	S1:Phosphorylation (STY):14.04	S747	NEEKPRSFTDGDD	98.7992	514.561	428.411	347.257	651.966	735.604	834.1	740.557	0.468914	0.045617
A0A1S4ED50	A0A1S4ED50|A0A1S4ED50_DIACI	S	ALS(+79.97)PYFQLTQAVR	3	13	Probable 26S proteasome non-ATPase regulatory subunit 3 OS=Diaphorina citri OX=121845 GN=LOC103510319 PE=4 SV=1	Probable 26S proteasome non-ATPase regulatory subunit 3	LOC103510319	48.39	1572.77	-4.4	306	318	S3:Phosphorylation (STY):30.83	S308	VLRRALSPYFQLT	145.065	126.864	95.0466	122.325	228.323	246.139	309.031	261.164	0.468385	0.00822193
A0A1S3DQY5	A0A1S3DQY5|A0A1S3DQY5_DIACI	T	TQPGT(+79.97)PGPSDYFPQVSR	5	17	Outer dense fiber protein 3-like protein 2 OS=Diaphorina citri OX=121845 GN=LOC103523167 PE=4 SV=1	Outer dense fiber protein 3-like protein 2	LOC103523167	53.46	1912.84	2.9	117	133	T5:Phosphorylation (STY):19.86	T121	VRTQPGTPGPSDY	10217.4	9517.26	4905.28	8213.3	15072	16142.3	21563.3	17592.5	0.466863	0.0228984
A0A3Q0IUT6	A0A3Q0IUT6|A0A3Q0IUT6_DIACI	S	WLNS(+79.97)PNVYQK	4	10	Protein hu-li tai shao OS=Diaphorina citri OX=121845 GN=LOC103507470 PE=3 SV=1	Protein hu-li tai shao	LOC103507470	54.27	1327.6	-3.1	403	412	S4:Phosphorylation (STY):25.11	S406	RTRWLNSPNVYQK	1222.75	1288.35	2868.94	1793.35	4275.21	3842.9	3440.2	3852.77	0.46547	0.0250662
A0A3Q0J5H7	A0A3Q0J5H7|A0A3Q0J5H7_DIACI	S	IGSAHNVS(+79.97)PHPFSSSVNGHDGK	8	22	PDZ and LIM domain protein Zasp-like OS=Diaphorina citri OX=121845 GN=LOC103515161 PE=4 SV=1	PDZ and LIM domain protein Zasp-like	LOC103515161	41.28	2310.02	-13.1	59	80	S8:Phosphorylation (STY):0.00	S66	GSAHNVSPHPFSS	1427.61	2046	1370.26	1614.63	3465.09	4105.88	2843.56	3471.51	0.465108	0.0118595
A0A3Q0IW92	A0A3Q0IW92|A0A3Q0IW92_DIACI	S	AGDIPVAEGEAEDAS(+79.97)R	15	16	Heat shock protein 83-like OS=Diaphorina citri OX=121845 GN=LOC103510738 PE=3 SV=1	Heat shock protein 83-like	LOC103510738	55.85	1665.69	1.7	342	357		S356	GEAEDASRMEEVD	1478.25	2052.27	845.223	1458.58	3799.34	3271.33	2359.36	3143.35	0.464022	0.0367819
A0A3Q0ITT6	A0A3Q0ITT6|A0A3Q0ITT6_DIACI	T	LAEDKIEDHGT(+79.97)PPKS(+79.97)PSDILDSR	11	23	Uncharacterized protein LOC103509596 OS=Diaphorina citri OX=121845 GN=LOC103509596 PE=4 SV=1	Uncharacterized protein LOC103509596	LOC103509596	57.55	2679.18	-1.6	613	635	T11:Phosphorylation (STY):36.87;S15:Phosphorylation (STY):8.22	T623	KIEDHGTPPKSPS	49748.7	18394.8	46682	38275.2	79883.5	85994.5	81678.6	82518.9	0.463835	0.012043
A0A3Q0ITT6	A0A3Q0ITT6|A0A3Q0ITT6_DIACI	S	LAEDKIEDHGT(+79.97)PPKS(+79.97)PSDILDSR	15	23	Uncharacterized protein LOC103509596 OS=Diaphorina citri OX=121845 GN=LOC103509596 PE=4 SV=1	Uncharacterized protein LOC103509596	LOC103509596	57.55	2679.18	-1.6	613	635	T11:Phosphorylation (STY):36.87;S15:Phosphorylation (STY):8.22	S627	HGTPPKSPSDILD	49748.7	18394.8	46682	38275.2	79883.5	85994.5	81678.6	82518.9	0.463835	0.012043
A0A3Q0IRL1	A0A3Q0IRL1|A0A3Q0IRL1_DIACI	T	LFSQPPT(+79.97)PAKT(+79.97)PPIR	7	15	Clathrin light chain OS=Diaphorina citri OX=121845 GN=LOC103505981 PE=3 SV=1	Clathrin light chain	LOC103505981	45.2	1808.86	1.5	7	21	T7:Phosphorylation (STY):11.12;T11:Phosphorylation (STY):43.76	T13	LFSQPPTPAKTPP	11829.9	3597.2	6992.58	7473.22	15775	15851.3	17011.6	16212.6	0.460951	0.0225889
A0A3Q0IRL1	A0A3Q0IRL1|A0A3Q0IRL1_DIACI	T	LFSQPPT(+79.97)PAKT(+79.97)PPIR	11	15	Clathrin light chain OS=Diaphorina citri OX=121845 GN=LOC103505981 PE=3 SV=1	Clathrin light chain	LOC103505981	45.2	1808.86	1.5	7	21	T7:Phosphorylation (STY):11.12;T11:Phosphorylation (STY):43.76	T17	PPTPAKTPPIREE	11829.9	3597.2	6992.58	7473.22	15775	15851.3	17011.6	16212.6	0.460951	0.0225889
A0A3Q0JD32	A0A3Q0JD32|A0A3Q0JD32_DIACI	S	SDGSLASSSGTQAASS(+79.97)PLSK	16	20	Patj homolog OS=Diaphorina citri OX=121845 GN=LOC113470420 PE=4 SV=1	Patj homolog	LOC113470420	51.99	1916.84	6	555	574	S16:Phosphorylation (STY):3.64	S570	GTQAASSPLSKLK	533.91	545.661	886.189	655.254	1273.95	1570.24	1422.51	1422.23	0.460721	0.00594108
A0A3Q0IYC4	A0A3Q0IYC4|A0A3Q0IYC4_DIACI	S	TSYIGAGDS(+79.97)SSR	9	12	Uncharacterized protein LOC113467620 OS=Diaphorina citri OX=121845 GN=LOC113467620 PE=4 SV=1	Uncharacterized protein LOC113467620	LOC113467620	51.7	1279.51	-2.8	94	105	S9:Phosphorylation (STY):0.00	S102	YIGAGDSSSRSET	789.279	443.588	440.521	557.796	1336.59	896.416	1413.58	1215.53	0.458892	0.0294953
A0A3Q0ITT6	A0A3Q0ITT6|A0A3Q0ITT6_DIACI	T	LAEDKIEDHGT(+79.97)PPKSPS(+79.97)DILDSR	11	23	Uncharacterized protein LOC103509596 OS=Diaphorina citri OX=121845 GN=LOC103509596 PE=4 SV=1	Uncharacterized protein LOC103509596	LOC103509596	37.15	2679.18	0.4	613	635	T11:Phosphorylation (STY):0.00;S17:Phosphorylation (STY):0.00	T623	KIEDHGTPPKSPS	49563.1	19564	42847.6	37324.9	78811.2	84671.4	80963.1	81481.9	0.458076	0.00881354
A0A3Q0ITT6	A0A3Q0ITT6|A0A3Q0ITT6_DIACI	S	LAEDKIEDHGT(+79.97)PPKSPS(+79.97)DILDSR	17	23	Uncharacterized protein LOC103509596 OS=Diaphorina citri OX=121845 GN=LOC103509596 PE=4 SV=1	Uncharacterized protein LOC103509596	LOC103509596	37.15	2679.18	0.4	613	635	T11:Phosphorylation (STY):0.00;S17:Phosphorylation (STY):0.00	S629	TPPKSPSDILDSR	49563.1	19564	42847.6	37324.9	78811.2	84671.4	80963.1	81481.9	0.458076	0.00881354
A0A3Q0IRL1	A0A3Q0IRL1|A0A3Q0IRL1_DIACI	S	LFS(+79.97)QPPT(+79.97)PAKT(+79.97)PPIR	3	15	Clathrin light chain OS=Diaphorina citri OX=121845 GN=LOC103505981 PE=3 SV=1	Clathrin light chain	LOC103505981	29.76	1888.83	1.8	7	21		S9	NPFKLFSQPPTPA	3132.15	2306.19	1343.02	2260.46	5716.15	3804.45	5314.53	4945.05	0.457115	0.0260848
A0A3Q0IRL1	A0A3Q0IRL1|A0A3Q0IRL1_DIACI	T	LFS(+79.97)QPPT(+79.97)PAKT(+79.97)PPIR	7	15	Clathrin light chain OS=Diaphorina citri OX=121845 GN=LOC103505981 PE=3 SV=1	Clathrin light chain	LOC103505981	29.76	1888.83	1.8	7	21		T13	LFSQPPTPAKTPP	3132.15	2306.19	1343.02	2260.46	5716.15	3804.45	5314.53	4945.05	0.457115	0.0260848
A0A3Q0IRL1	A0A3Q0IRL1|A0A3Q0IRL1_DIACI	T	LFS(+79.97)QPPT(+79.97)PAKT(+79.97)PPIR	11	15	Clathrin light chain OS=Diaphorina citri OX=121845 GN=LOC103505981 PE=3 SV=1	Clathrin light chain	LOC103505981	29.76	1888.83	1.8	7	21		T17	PPTPAKTPPIREE	3132.15	2306.19	1343.02	2260.46	5716.15	3804.45	5314.53	4945.05	0.457115	0.0260848
A0A3Q0JKR6	A0A3Q0JKR6|A0A3Q0JKR6_DIACI	S	S(+79.97)PHSGPVQFSPR	1	12	Protein CLEC16A homolog OS=Diaphorina citri OX=121845 GN=LOC103520558 PE=4 SV=1	Protein CLEC16A homolog	LOC103520558	47.78	1374.61	-2.2	305	316	S1:Phosphorylation (STY):28.36	S305	GRTSSRSPHSGPV	735.087	349.563	761.562	615.404	1418.59	1687.83	933.013	1346.48	0.457047	0.0471119
A0A1S3D0X8	A0A1S3D0X8|A0A1S3D0X8_DIACI	S	VVPYGHTNLS(+79.97)WDEGYVK	10	17	Uncharacterized protein LOC103509106 OS=Diaphorina citri OX=121845 GN=LOC103509106 PE=4 SV=1	Uncharacterized protein LOC103509106	LOC103509106	38.71	2042.91	-0.6	220	236	S10:Phosphorylation (STY):3.64	S229	YGHTNLSWDEGYV	2527	3786.01	5044.53	3785.85	6044.39	9989.27	8910.58	8314.74	0.455318	0.03068
A0A3Q0JBQ7	A0A3Q0JBQ7|A0A3Q0JBQ7_DIACI	S	NELFEIS(+79.97)SDKLK	7	12	Uncharacterized protein LOC113471143 OS=Diaphorina citri OX=121845 GN=LOC113471143 PE=4 SV=1	Uncharacterized protein LOC113471143	LOC113471143	53.8	1501.71	0.8	267	278	S7:Phosphorylation (STY):7.21	S273	NELFEISSDKLKS	2433.21	3178.97	3091.6	2901.26	5561.98	6742.14	6840.86	6381.66	0.454624	0.00182419
A0A3Q0JH02	A0A3Q0JH02|A0A3Q0JH02_DIACI	S	LQTGNDS(+79.97)DVDEFLK	7	14	Hyphal wall protein 1-like OS=Diaphorina citri OX=121845 GN=LOC103518897 PE=4 SV=1	Hyphal wall protein 1-like	LOC103518897	50.2	1659.7	4.9	172	185	S7:Phosphorylation (STY):34.30	S178	LQTGNDSDVDEFL	195.397	770.413	841.338	602.382	1080.22	1367.98	1529.08	1325.76	0.454368	0.0408814
A0A3Q0IQW5	A0A3Q0IQW5|A0A3Q0IQW5_DIACI	Y	C(+57.02)LSPY(+79.97)DNLLENC(+57.02)TIR	5	15	Uncharacterized protein LOC108252263 OS=Diaphorina citri OX=121845 GN=LOC108252263 PE=4 SV=1	Uncharacterized protein LOC108252263	LOC108252263	44.21	1946.83	-0.5	595	609	C1:Carbamidomethylation:1000.00;Y5:Phosphorylation (STY):0.00;C12:Carbamidomethylation:1000.00	Y599	TKCLSPYDNLLEN	299.113	171.93	464.736	311.926	521.347	851.864	687.995	687.069	0.453996	0.0424186
A0A1S3D1D0	A0A1S3D1D0|A0A1S3D1D0_DIACI:A0A1S3D002|A0A1S3D002_DIACI:A0A3Q0IRJ5|A0A3Q0IRJ5_DIACI:A0A1S3CZY6|A0A1S3CZY6_DIACI	S	TITLPVNISQS(+79.97)PIK	11	14	Zinc finger protein 184 isoform X3 OS=Diaphorina citri OX=121845 GN=LOC103508507 PE=4 SV=1	Zinc finger protein 184 isoform X3	LOC103508507	60.63	1589.84	-2.7	157	170	S11:Phosphorylation (STY):12.81	S167	PVNISQSPIKLSG	164.553	164.602	130.276	153.143	413.543	224.361	374.376	337.426	0.453857	0.0350033
A0A1S3DAJ3	A0A1S3DAJ3|A0A1S3DAJ3_DIACI	S	GDLS(+79.97)LDLDQLDC(+57.02)AC(+57.02)K	4	15	Uncharacterized protein LOC103514595 isoform X1 OS=Diaphorina citri OX=121845 GN=LOC103514595 PE=4 SV=1	Uncharacterized protein LOC103514595 isoform X1	LOC103514595	71.91	1801.73	0.1	140	154	C12:Carbamidomethylation:1000.00;C14:Carbamidomethylation:1000.00	S143	KAKGDLSLDLDQL	5087.37	7895.93	4661.99	5881.76	12889.1	11533.3	14461.5	12961.3	0.453794	0.0058498
A0A1S4EBJ2	A0A1S4EBJ2|A0A1S4EBJ2_DIACI	S	ILDS(+79.97)PDSASPPELK	4	14	Enhancer of mRNA-decapping protein 3 OS=Diaphorina citri OX=121845 GN=LOC103509216 PE=4 SV=1	Enhancer of mRNA-decapping protein 3	LOC103509216	68.77	1547.71	1.2	59	72	S4:Phosphorylation (STY):25.67	S62	NLKILDSPDSASP	1313.81	1742.85	841.354	1299.34	3063.72	3030.13	2513.9	2869.25	0.452849	0.0076056
A0A1S4EM11	A0A1S4EM11|A0A1S4EM11_DIACI	S	TFS(+79.97)AETITENVEMVR	3	15	phosphatidate phosphatase OS=Diaphorina citri OX=121845 GN=LOC103518162 PE=3 SV=1	phosphatidate phosphatase	LOC103518162	64.62	1805.79	2.2	221	235	S3:Phosphorylation (STY):17.01	S223	ALPKTFSAETITE	5684.24	7356.49	5753.62	6264.78	11015.1	17409.9	13084.1	13836.4	0.452777	0.0181463
A0A3Q0IUZ5	A0A3Q0IUZ5|A0A3Q0IUZ5_DIACI	S	WPS(+79.97)LQSHNELR	3	11	Mothers against decapentaplegic homolog OS=Diaphorina citri OX=121845 GN=LOC103510178 PE=3 SV=1	Mothers against decapentaplegic homolog	LOC103510178	43.83	1445.65	2.9	94	104	S3:Phosphorylation (STY):28.96	S96	RLWRWPSLQSHNE	315.638	506.326	692.306	504.757	893.942	1347.55	1104.64	1115.38	0.452543	0.0230496
A0A3Q0IHS2	A0A3Q0IHS2|A0A3Q0IHS2_DIACI:A0A3Q0JIL8|A0A3Q0JIL8_DIACI	S	LTSEYVS(+79.97)NPTLEK	7	13	WD repeat-containing protein 44 OS=Diaphorina citri OX=121845 GN=LOC103524571 PE=4 SV=1	WD repeat-containing protein 44	LOC103524571	66.92	1559.71	-1.1	311	323	S7:Phosphorylation (STY):37.54	S317	LTSEYVSNPTLEK	928.332	1878.68	1502.99	1436.67	2958.06	2622.51	3953.21	3177.93	0.452076	0.0230798
A0A3Q0J7B6	A0A3Q0J7B6|A0A3Q0J7B6_DIACI	S	VHPSDVPS(+79.97)DHLLLDR	8	15	Uncharacterized protein LOC113470266 OS=Diaphorina citri OX=121845 GN=LOC113470266 PE=4 SV=1	Uncharacterized protein LOC113470266	LOC113470266	47.79	1778.84	-4	111	125	S8:Phosphorylation (STY):16.51	S118	HPSDVPSDHLLLD	2194.5	4227.02	3131.49	3184.34	5879.76	6333.24	9052.36	7088.45	0.449229	0.0275305
A0A1S3DHH7	A0A1S3DHH7|A0A1S3DHH7_DIACI	S	KLS(+79.97)YQNWLINESNLDDR	3	17	Vicilin-like seed storage protein At2g18540 OS=Diaphorina citri OX=121845 GN=LOC103517821 PE=4 SV=1	Vicilin-like seed storage protein At2g18540	LOC103517821	66.95	2187	-3.7	394	410	S3:Phosphorylation (STY):0.00	S396	KLRRKLSYQNWLI	31050.1	72879	42236.4	48721.9	85181	113332	126916	108476	0.449147	0.0270687
A0A1S4EA97	A0A1S4EA97|A0A1S4EA97_DIACI	T	TSAST(+79.97)PDGDVSFVSNK	5	16	Microtubule-associated protein OS=Diaphorina citri OX=121845 GN=LOC103508001 PE=4 SV=2	Microtubule-associated protein	LOC103508001	71.25	1690.71	-3	763	778	T5:Phosphorylation (STY):23.10	T767	VKTSASTPDGDVS	7562.78	3733.52	5540.82	5612.37	13123.7	12395.2	12022.4	12513.8	0.448496	0.00390816
A0A1S3DQY5	A0A1S3DQY5|A0A1S3DQY5_DIACI	S	DTATSGVPFYS(+79.97)LTNLNAYK	11	19	Outer dense fiber protein 3-like protein 2 OS=Diaphorina citri OX=121845 GN=LOC103523167 PE=4 SV=1	Outer dense fiber protein 3-like protein 2	LOC103523167	71.48	2140.97	0.9	80	98	S11:Phosphorylation (STY):33.98	S90	SGVPFYSLTNLNA	10463.7	22036.7	18610.7	17037	38685.8	31492.7	43905.3	38027.9	0.448013	0.0134645
A0A3Q0INM2	A0A3Q0INM2|A0A3Q0INM2_DIACI	T	YIKPT(+79.97)PEPTPT(+79.97)PQR	5	14	Proteoglycan 4 OS=Diaphorina citri OX=121845 GN=LOC103524819 PE=4 SV=1	Proteoglycan 4	LOC103524819	40.63	1783.79	-10.1	545	558	T5:Phosphorylation (STY):16.76;T11:Phosphorylation (STY):11.10	T549	ERYIKPTPEPTPT	165.236	399.427	398.557	321.073	692.958	598.467	858.713	716.713	0.447981	0.0220919
A0A3Q0INM2	A0A3Q0INM2|A0A3Q0INM2_DIACI	T	YIKPT(+79.97)PEPTPT(+79.97)PQR	11	14	Proteoglycan 4 OS=Diaphorina citri OX=121845 GN=LOC103524819 PE=4 SV=1	Proteoglycan 4	LOC103524819	40.63	1783.79	-10.1	545	558	T5:Phosphorylation (STY):16.76;T11:Phosphorylation (STY):11.10	T555	TPEPTPTPQRVNT	165.236	399.427	398.557	321.073	692.958	598.467	858.713	716.713	0.447981	0.0220919
A0A1S3CWD1	A0A1S3CWD1|A0A1S3CWD1_DIACI	S	EDS(+79.97)PDSVGYIEGDHPLRR	3	18	Solute carrier family 2, facilitated glucose transporter member 1 isoform X1 OS=Diaphorina citri OX=121845 GN=LOC103505775 PE=3 SV=1	Solute carrier family 2, facilitated glucose transporter member 1 isoform X1	LOC103505775	29.93	2120.92	-1.9	11	28	S3:Phosphorylation (STY):28.36	S13	MGDREDSPDSVGY	2234.8	4528.62	3365.13	3376.19	5385.77	7540.61	9685.45	7537.27	0.447932	0.0416443
A0A3Q0JI98	A0A3Q0JI98|A0A3Q0JI98_DIACI	S	SNS(+79.97)FDISMLPDGK	3	13	Uncharacterized protein LOC113472554 OS=Diaphorina citri OX=121845 GN=LOC113472554 PE=4 SV=1	Uncharacterized protein LOC113472554	LOC113472554	64.86	1489.62	-2.9	203	215	S3:Phosphorylation (STY):0.00	S205	KGSRSNSFDISML	1839.64	2815.53	3406.64	2687.27	5872.91	6696.86	5454.29	6008.02	0.447281	0.00474599
A0A3Q0J8X5	A0A3Q0J8X5|A0A3Q0J8X5_DIACI	S	SLPSVETLGC(+57.02)TS(+79.97)VIC(+57.02)SDK	12	18	Calcium-transporting ATPase sarcoplasmic/endoplasmic reticulum type-like OS=Diaphorina citri OX=121845 GN=LOC103514384 PE=4 SV=1	Calcium-transporting ATPase sarcoplasmic/endoplasmic reticulum type-like	LOC103514384	49.45	2031.89	1.4	355	372	C10:Carbamidomethylation:1000.00;S12:Phosphorylation (STY):0.00;C15:Carbamidomethylation:1000.00	S366	ETLGCTSVICSDK	347.118	148.884	227.843	241.282	631.356	547.785	442.478	540.54	0.446372	0.0196293
A0A1S3D4W4	A0A1S3D4W4|A0A1S3D4W4_DIACI	S	IEIDEIGNRS(+79.97)PT(+79.97)PK	10	14	Uncharacterized protein LOC103511395 OS=Diaphorina citri OX=121845 GN=LOC103511395 PE=4 SV=1	Uncharacterized protein LOC103511395	LOC103511395	38.06	1727.75	-1	650	663		S659	DEIGNRSPTPKSK	1960.74	3739.79	2116.15	2605.56	4681.93	5236.35	7598.17	5838.82	0.446248	0.0379926
A0A1S3D4W4	A0A1S3D4W4|A0A1S3D4W4_DIACI	T	IEIDEIGNRS(+79.97)PT(+79.97)PK	12	14	Uncharacterized protein LOC103511395 OS=Diaphorina citri OX=121845 GN=LOC103511395 PE=4 SV=1	Uncharacterized protein LOC103511395	LOC103511395	38.06	1727.75	-1	650	663		T661	IGNRSPTPKSKQS	1960.74	3739.79	2116.15	2605.56	4681.93	5236.35	7598.17	5838.82	0.446248	0.0379926
A0A3Q0JQD8	A0A3Q0JQD8|A0A3Q0JQD8_DIACI	S	RLS(+79.97)ENSSSADSVLNSIK	3	17	Oxidoreductase GLYR1 homolog OS=Diaphorina citri OX=121845 GN=LOC103524084 PE=4 SV=1	Oxidoreductase GLYR1 homolog	LOC103524084	46.8	1885.88	2	172	188	S3:Phosphorylation (STY):6.63	S174	GSSKRLSENSSSA	3154.25	2678.15	1968.64	2600.34	5959.38	6182.59	5344.44	5828.8	0.44612	0.00162528
A0A3Q0ISK6	A0A3Q0ISK6|A0A3Q0ISK6_DIACI	S	SES(+79.97)PPPQQLHEYLR	3	14	Uncharacterized protein LOC113466272 OS=Diaphorina citri OX=121845 GN=LOC113466272 PE=4 SV=1	Uncharacterized protein LOC113466272	LOC113466272	48.51	1759.79	1.3	198	211	S3:Phosphorylation (STY):0.00	S200	PSERSESPPPQQL	11051.4	5533.01	6864.97	7816.46	15561.5	23212.5	13843.6	17539.2	0.445657	0.0430714
A0A1S4ERC2	A0A1S4ERC2|A0A1S4ERC2_DIACI	T	S(+42.01)EETPAAPT(+79.97)SSTPPAEVAPEEEGAEFSVETILDKR	9	35	Chromobox protein homolog 1-like OS=Diaphorina citri OX=121845 GN=LOC103522714 PE=4 SV=1	Chromobox protein homolog 1-like	LOC103522714	36.45	3792.71	-5.5	2	36	S1:Acetylation (Protein N-term):1000.00;T9:Phosphorylation (STY):0.00	T10	ETPAAPTSSTPPA		260.034	280.108	270.071	483.754	681.788	654.75	606.764	0.4451	0.0248138
A0A1S3DH23	A0A1S3DH23|A0A1S3DH23_DIACI	S	DQWTEISPS(+79.97)ILEAK	9	14	Uncharacterized protein LOC103518240 OS=Diaphorina citri OX=121845 GN=LOC103518240 PE=4 SV=1	Uncharacterized protein LOC103518240	LOC103518240	59.6	1695.78	1.1	389	402	S9:Phosphorylation (STY):18.53	S397	WTEISPSILEAKD	388.317	1201.58	1309.52	966.472	2379.26	2008.98	2131.68	2173.31	0.444701	0.0177351
A0A1S3DII8	A0A1S3DII8|A0A1S3DII8_DIACI	S	ERPIS(+79.97)PVPVNK	5	11	Calponin homology domain-containing protein DDB_G0272472-like OS=Diaphorina citri OX=121845 GN=LOC103519367 PE=4 SV=2	Calponin homology domain-containing protein DDB_G0272472-like	LOC103519367	49.63	1314.67	-2.3	103	113		S107	ERERPISPVPVNK	4529.11	2810.98	3116.73	3485.61	6918.14	7802.49	8812.68	7844.44	0.444341	0.00460617
A0A1S3D2R7	A0A1S3D2R7|A0A1S3D2R7_DIACI	S	IYEKS(+79.97)PPPDYVNR	5	13	Testicular haploid expressed gene protein OS=Diaphorina citri OX=121845 GN=LOC103510326 PE=4 SV=1	Testicular haploid expressed gene protein	LOC103510326	56.03	1656.75	0.3	87	99	S5:Phosphorylation (STY):50.22	S91	TRIYEKSPPPDYV	4450.61	3090.5	4237.1	3926.07	7884.26	8503.76	10157.7	8848.57	0.443696	0.00352681
A0A3Q0JD68	A0A3Q0JD68|A0A3Q0JD68_DIACI	S	AAADNVSSAGLQNLLYDSPSPPS(+79.97)PSITVEPTK	23	32	Patronin-like OS=Diaphorina citri OX=121845 GN=LOC103516486 PE=4 SV=1	Patronin-like	LOC103516486	47.32	3305.57	1.7	469	500	S23:Phosphorylation (STY):7.32	S491	DSPSPPSPSITVE	370.467	1000.23	388.502	586.399	1622.89	1285.63	1065.91	1324.81	0.442628	0.04834
A0A1S3DL04	A0A1S3DL04|A0A1S3DL04_DIACI	S	VPS(+79.97)ELLHYGS(+79.97)LQDVR	3	15	Uncharacterized protein LOC103520686 OS=Diaphorina citri OX=121845 GN=LOC103520686 PE=4 SV=1	Uncharacterized protein LOC103520686	LOC103520686	44.06	1871.82	0.9	262	276	S3:Phosphorylation (STY):23.70;S10:Phosphorylation (STY):6.59	S264	DVDRVPSELLHYG	2598.49	7227.45	6460.52	5428.82	10886	11812.8	14146.1	12281.6	0.442027	0.0166559
A0A1S3DL04	A0A1S3DL04|A0A1S3DL04_DIACI	S	VPS(+79.97)ELLHYGS(+79.97)LQDVR	10	15	Uncharacterized protein LOC103520686 OS=Diaphorina citri OX=121845 GN=LOC103520686 PE=4 SV=1	Uncharacterized protein LOC103520686	LOC103520686	44.06	1871.82	0.9	262	276	S3:Phosphorylation (STY):23.70;S10:Phosphorylation (STY):6.59	S271	ELLHYGSLQDVRE	2598.49	7227.45	6460.52	5428.82	10886	11812.8	14146.1	12281.6	0.442027	0.0166559
A0A3Q0IXF2	A0A3Q0IXF2|A0A3Q0IXF2_DIACI	S	QSLSS(+79.97)PADIVYDLDDSETGADLTK	5	24	Uncharacterized protein LOC103511321 OS=Diaphorina citri OX=121845 GN=LOC103511321 PE=3 SV=1	Uncharacterized protein LOC103511321	LOC103511321	56.97	2619.15	-3	1237	1260	S5:Phosphorylation (STY):17.01	S1241	DKQSLSSPADIVY	166.769	691.414	646.815	501.666	1394.22	1016.02	996.306	1135.52	0.441795	0.0403769
A0A3Q0J526	A0A3Q0J526|A0A3Q0J526_DIACI	S	YS(+79.97)VPNIPDQIR	2	11	Dynein heavy chain 7, axonemal-like OS=Diaphorina citri OX=121845 GN=LOC103515099 PE=3 SV=1	Dynein heavy chain 7, axonemal-like	LOC103515099	47.39	1380.64	-3.4	69	79	S2:Phosphorylation (STY):0.00	S70	KPSSKYSVPNIPD	1048.52	1883.09	1545.17	1492.26	4366.67	2290.3	3491.45	3382.81	0.44113	0.0435114
A0A1S3CZA5	A0A1S3CZA5|A0A1S3CZA5_DIACI	S	AADVDITPVDGDS(+79.97)EDASR	13	18	Heat shock protein 83 OS=Diaphorina citri OX=121845 GN=LOC103508055 PE=3 SV=1	Heat shock protein 83	LOC103508055	57.96	1911.77	1.7	701	718	S13:Phosphorylation (STY):25.11	S713	TPVDGDSEDASRM	1644.25	5013.6	4016.23	3558.03	8413.98	9159	6701.73	8091.57	0.43972	0.0214305
A0A1S3DBI6	A0A1S3DBI6|A0A1S3DBI6_DIACI:A0A1S3DBA0|A0A1S3DBA0_DIACI:A0A1S3DBH7|A0A1S3DBH7_DIACI	S	EEPDIGTS(+79.97)HTS(+79.97)LPESDPPEYFDLPPLGTAK	8	30	Formin-binding protein 1-like isoform X1 OS=Diaphorina citri OX=121845 GN=LOC103515191 PE=4 SV=1	Formin-binding protein 1-like isoform X1	LOC103515191	25.47	3398.45	0.6	535	564	S8:Phosphorylation (STY):0.00;S11:Phosphorylation (STY):0.00	S542	EPDIGTSHTSLPE	185.415	431.442	239.408	285.422	849.686	580.483	522.067	650.745	0.438608	0.0436445
A0A1S3DBI6	A0A1S3DBI6|A0A1S3DBI6_DIACI:A0A1S3DBA0|A0A1S3DBA0_DIACI:A0A1S3DBH7|A0A1S3DBH7_DIACI	S	EEPDIGTS(+79.97)HTS(+79.97)LPESDPPEYFDLPPLGTAK	11	30	Formin-binding protein 1-like isoform X1 OS=Diaphorina citri OX=121845 GN=LOC103515191 PE=4 SV=1	Formin-binding protein 1-like isoform X1	LOC103515191	25.47	3398.45	0.6	535	564	S8:Phosphorylation (STY):0.00;S11:Phosphorylation (STY):0.00	S545	IGTSHTSLPESDP	185.415	431.442	239.408	285.422	849.686	580.483	522.067	650.745	0.438608	0.0436445
A0A3Q0IQ17	A0A3Q0IQ17|A0A3Q0IQ17_DIACI	T	T(+79.97)SPPVNVLKPGGQR	1	14	Uncharacterized protein LOC103507814 OS=Diaphorina citri OX=121845 GN=LOC103507814 PE=4 SV=1	Uncharacterized protein LOC103507814	LOC103507814	54.53	1528.78	-0.3	187	200	T1:Phosphorylation (STY):7.21	T187	VPLQFRTSPPVNV	942.073	571.365	210.331	574.589	1503.83	1075.28	1353.68	1310.93	0.438306	0.0400791
A0A3Q0JDT0	A0A3Q0JDT0|A0A3Q0JDT0_DIACI	S	VTIWGAGEASSPPTES(+79.97)VC(+57.02)LDEK	16	22	Sodium/potassium/calcium exchanger 1-like OS=Diaphorina citri OX=121845 GN=LOC113471557 PE=4 SV=1	Sodium/potassium/calcium exchanger 1-like	LOC113471557	36.35	2412.06	-2.6	93	114	S16:Phosphorylation (STY):0.00;C18:Carbamidomethylation:1000.00	S108	SSPPTESVCLDEK	283.53	266.027	372.907	307.488	685.687	583.652	840.942	703.427	0.437128	0.00839679
A0A1S3CX62	A0A1S3CX62|A0A1S3CX62_DIACI	S	S(+79.97)NEFLLTDVGIDK	1	13	Uncharacterized protein LOC103506901 OS=Diaphorina citri OX=121845 GN=LOC103506901 PE=4 SV=1	Uncharacterized protein LOC103506901	LOC103506901	57.66	1529.7	4.1	68	80	S1:Phosphorylation (STY):71.27	S68	KLNIYRSNEFLLT	777.061	787.379	216.107	593.516	1489.55	1140.9	1446.99	1359.15	0.436682	0.0247515
A0A1S3DF06	A0A1S3DF06|A0A1S3DF06_DIACI	S	NLTTAAEDDEDDDEVTS(+79.97)PGGSR	17	22	Protein vestigial-like OS=Diaphorina citri OX=121845 GN=LOC103517149 PE=4 SV=1	Protein vestigial-like	LOC103517149	28.21	2372.91	5.4	113	134	S17:Phosphorylation (STY):14.02	S129	DDDEVTSPGGSRA	258.584	234.17	134.861	209.205	553.602	435.4	449.122	479.375	0.436411	0.00706342
A0A3Q0J9R4	A0A3Q0J9R4|A0A3Q0J9R4_DIACI	S	YSSS(+79.97)QDISSDKYASNETLHR	4	20	GATA zinc finger domain-containing protein 14-like OS=Diaphorina citri OX=121845 GN=LOC113470729 PE=4 SV=1	GATA zinc finger domain-containing protein 14-like	LOC113470729	27.79	2367	2.6	51	70	S4:Phosphorylation (STY):5.08	S54	DSRYSSSQDISSD	187.516	269.218	396.29	284.341	780.457	462.835	712.726	652.006	0.436102	0.0322071
A0A3Q0IKP6	A0A3Q0IKP6|A0A3Q0IKP6_DIACI	S	VLS(+79.97)EHELR	3	8	Uncharacterized protein LOC103505666 OS=Diaphorina citri OX=121845 GN=LOC103505666 PE=4 SV=1	Uncharacterized protein LOC103505666	LOC103505666	50.29	1061.49	-0.5	855	862		S857	RKERVLSEHELRV	6994.56	2114.66	5608.65	4905.96	10843.7	12063.7	10877.1	11261.5	0.435639	0.0134844
A0A3Q0JD45	A0A3Q0JD45|A0A3Q0JD45_DIACI:A0A1S3DHP6|A0A1S3DHP6_DIACI	S	SLSTSNSYSLS(+79.97)PK	11	13	Uncharacterized protein OS=Diaphorina citri OX=121845 GN=LOC103518876 PE=4 SV=1	Uncharacterized protein	LOC103518876	51.56	1449.64	-0.5	218	230	S11:Phosphorylation (STY):14.04	S228	SNSYSLSPKITRI	537.531	583.324	493.486	538.114	1249.55	1004.56	1455.08	1236.4	0.435227	0.00625896
A0A3Q0ITT6	A0A3Q0ITT6|A0A3Q0ITT6_DIACI	S	KLS(+79.97)KDELIIAEVSK	3	14	Uncharacterized protein LOC103509596 OS=Diaphorina citri OX=121845 GN=LOC103509596 PE=4 SV=1	Uncharacterized protein LOC103509596	LOC103509596	71.26	1651.88	2.3	670	683	S3:Phosphorylation (STY):187.15	S672	SQDRKLSKDELII	58321.9	77001.8	72736.5	69353.4	117184	207172	153954	159437	0.434991	0.0280273
A0A3Q0IN52	A0A3Q0IN52|A0A3Q0IN52_DIACI	S	YKKS(+79.97)ET(+79.97)IDEIVNIKPR	4	16	LOW QUALITY PROTEIN: titin OS=Diaphorina citri OX=121845 GN=LOC103524768 PE=4 SV=1	LOW QUALITY PROTEIN: titin	LOC103524768	64.1	2092	-2.6	1429	1444	S4:Phosphorylation (STY):11.12;T6:Phosphorylation (STY):13.97	S1432	SSRYKKSETIDEI	2671.54	5548.17	4626.61	4282.1	8151.99	9530.36	11865.1	9849.15	0.434769	0.0155322
A0A3Q0IN52	A0A3Q0IN52|A0A3Q0IN52_DIACI	T	YKKS(+79.97)ET(+79.97)IDEIVNIKPR	6	16	LOW QUALITY PROTEIN: titin OS=Diaphorina citri OX=121845 GN=LOC103524768 PE=4 SV=1	LOW QUALITY PROTEIN: titin	LOC103524768	64.1	2092	-2.6	1429	1444	S4:Phosphorylation (STY):11.12;T6:Phosphorylation (STY):13.97	T1434	RYKKSETIDEIVN	2671.54	5548.17	4626.61	4282.1	8151.99	9530.36	11865.1	9849.15	0.434769	0.0155322
A0A1S4ELX2	A0A1S4ELX2|A0A1S4ELX2_DIACI	T	T(+79.97)NSAESLSVIPEPGLPK	1	17	Uncharacterized protein LOC103518046 OS=Diaphorina citri OX=121845 GN=LOC103518046 PE=4 SV=1	Uncharacterized protein LOC103518046	LOC103518046	55.68	1817.88	2.4	564	580	T1:Phosphorylation (STY):0.00	T564	PVPLTKTNSAESL	971.24	357.087	561.929	630.085	1471.78	1225.88	1656.73	1451.46	0.434104	0.0200759
A0A1S3CWD2	A0A1S3CWD2|A0A1S3CWD2_DIACI	S	LEC(+57.02)ALDEIKS(+79.97)EDLTR	10	15	Uncharacterized protein LOC103506481 OS=Diaphorina citri OX=121845 GN=LOC103506481 PE=4 SV=1	Uncharacterized protein LOC103506481	LOC103506481	42.68	1870.84	2	80	94	C3:Carbamidomethylation:1000.00;S10:Phosphorylation (STY):25.11	S89	ALDEIKSEDLTRS	2713.39	3885.96	2518.6	3039.32	5487.51	6291.92	9437.06	7072.16	0.429758	0.034367
A0A1S3D8Q0	A0A1S3D8Q0|A0A1S3D8Q0_DIACI	S	EQIES(+79.97)VYES(+79.97)RVSLPTSAAGDYYMEYQK	5	27	Uncharacterized protein LOC103513672 isoform X1 OS=Diaphorina citri OX=121845 GN=LOC103513672 PE=4 SV=1	Uncharacterized protein LOC103513672 isoform X1	LOC103513672	31.06	3302.38	6.5	104	130	S5:Phosphorylation (STY):0.00;S9:Phosphorylation (STY):0.00	S108	KKEQIESVYESRV	258.419	678.324	630.843	522.529	1209.75	1119.91	1352.37	1227.34	0.425739	0.0091063
A0A1S3D8Q0	A0A1S3D8Q0|A0A1S3D8Q0_DIACI	S	EQIES(+79.97)VYES(+79.97)RVSLPTSAAGDYYMEYQK	9	27	Uncharacterized protein LOC103513672 isoform X1 OS=Diaphorina citri OX=121845 GN=LOC103513672 PE=4 SV=1	Uncharacterized protein LOC103513672 isoform X1	LOC103513672	31.06	3302.38	6.5	104	130	S5:Phosphorylation (STY):0.00;S9:Phosphorylation (STY):0.00	S112	IESVYESRVSLPT	258.419	678.324	630.843	522.529	1209.75	1119.91	1352.37	1227.34	0.425739	0.0091063
A0A1S3D1A8	A0A1S3D1A8|A0A1S3D1A8_DIACI	S	AS(+79.97)GVTVSDIC(+57.02)K	2	11	Cofilin/actin-depolymerizing factor homolog isoform X1 OS=Diaphorina citri OX=121845 GN=LOC103509384 PE=3 SV=2	Cofilin/actin-depolymerizing factor homolog isoform X1	LOC103509384	42.83	1215.52	2.9	2	12	S2:Phosphorylation (STY):28.36;C10:Carbamidomethylation:1000.00	S3	____MASGVTVSD	196.677	101.855	94.1888	130.907	406.835	266.547	249.082	307.488	0.425731	0.0419046
A0A3Q0J919	A0A3Q0J919|A0A3Q0J919_DIACI	S	LWEGES(+79.97)PPEVK	6	11	Tyrosine-protein kinase OS=Diaphorina citri OX=121845 GN=LOC103516918 PE=3 SV=1	Tyrosine-protein kinase	LOC103516918	48.94	1349.59	-0.3	1219	1229		S1224	KLWEGESPPEVKS	1036.93	583.236	596.81	738.993	1437.52	1723.99	2045.98	1735.83	0.425729	0.0123877
A0A3Q0INC1	A0A3Q0INC1|A0A3Q0INC1_DIACI	S	RSS(+79.97)S(+79.97)LRLS(+79.97)TASSEPAAK	3	17	Small ribosomal subunit protein eS6 OS=Diaphorina citri OX=121845 GN=LOC103506970 PE=3 SV=1	Small ribosomal subunit protein eS6	LOC103506970	37.81	1986.82	0.9	177	193	S3:Phosphorylation (STY):17.01;S4:Phosphorylation (STY):32.28;S8:Phosphorylation (STY):0.00	S179	RKRRRSSSLRLST	7068.04	7031.03	11873.9	8657.67	22330.9	23134	15558.3	20341	0.425626	0.0155898
A0A3Q0INC1	A0A3Q0INC1|A0A3Q0INC1_DIACI	S	RSS(+79.97)S(+79.97)LRLS(+79.97)TASSEPAAK	4	17	Small ribosomal subunit protein eS6 OS=Diaphorina citri OX=121845 GN=LOC103506970 PE=3 SV=1	Small ribosomal subunit protein eS6	LOC103506970	37.81	1986.82	0.9	177	193	S3:Phosphorylation (STY):17.01;S4:Phosphorylation (STY):32.28;S8:Phosphorylation (STY):0.00	S180	KRRRSSSLRLSTA	7068.04	7031.03	11873.9	8657.67	22330.9	23134	15558.3	20341	0.425626	0.0155898
A0A3Q0INC1	A0A3Q0INC1|A0A3Q0INC1_DIACI	S	RSS(+79.97)S(+79.97)LRLS(+79.97)TASSEPAAK	8	17	Small ribosomal subunit protein eS6 OS=Diaphorina citri OX=121845 GN=LOC103506970 PE=3 SV=1	Small ribosomal subunit protein eS6	LOC103506970	37.81	1986.82	0.9	177	193	S3:Phosphorylation (STY):17.01;S4:Phosphorylation (STY):32.28;S8:Phosphorylation (STY):0.00	S184	SSSLRLSTASSEP	7068.04	7031.03	11873.9	8657.67	22330.9	23134	15558.3	20341	0.425626	0.0155898
A0A3Q0ITU5	A0A3Q0ITU5|A0A3Q0ITU5_DIACI	T	SLKVDT(+79.97)PPKT(+79.97)PTDK	6	14	Muscle M-line assembly protein unc-89-like OS=Diaphorina citri OX=121845 GN=LOC113467622 PE=4 SV=1	Muscle M-line assembly protein unc-89-like	LOC113467622	51.07	1685.77	1.4	475	488	T6:Phosphorylation (STY):53.33;T10:Phosphorylation (STY):14.04	T480	KSLKVDTPPKTPT	9788.41	5969.24	13054.3	9603.99	21152	20870.1	25854.7	22625.6	0.424474	0.00753463
A0A3Q0ITU5	A0A3Q0ITU5|A0A3Q0ITU5_DIACI	T	SLKVDT(+79.97)PPKT(+79.97)PTDK	10	14	Muscle M-line assembly protein unc-89-like OS=Diaphorina citri OX=121845 GN=LOC113467622 PE=4 SV=1	Muscle M-line assembly protein unc-89-like	LOC113467622	51.07	1685.77	1.4	475	488	T6:Phosphorylation (STY):53.33;T10:Phosphorylation (STY):14.04	T484	VDTPPKTPTDKSI	9788.41	5969.24	13054.3	9603.99	21152	20870.1	25854.7	22625.6	0.424474	0.00753463
A0A1S4EBJ2	A0A1S4EBJ2|A0A1S4EBJ2_DIACI	S	ILDSPDS(+79.97)ASPPELK	7	14	Enhancer of mRNA-decapping protein 3 OS=Diaphorina citri OX=121845 GN=LOC103509216 PE=4 SV=1	Enhancer of mRNA-decapping protein 3	LOC103509216	44	1547.71	-2	59	72	S7:Phosphorylation (STY):0.00	S65	ILDSPDSASPPEL	1087.23	2025.4	841.354	1317.99	3063.72	3754.19	2513.9	3110.6	0.42371	0.0243809
A0A3Q0JDY9	A0A3Q0JDY9|A0A3Q0JDY9_DIACI	S	TVETPS(+79.97)PTNTKPPLMSR	6	17	Serine/threonine-protein kinase pakE-like OS=Diaphorina citri OX=121845 GN=LOC103519335 PE=4 SV=1	Serine/threonine-protein kinase pakE-like	LOC103519335	42.98	1934.92	-0.1	104	120	S6:Phosphorylation (STY):10.19	S109	RTVETPSPTNTKP	5571.94	8363.19	2954.91	5630.01	13240.7	14598.7	12074.7	13304.7	0.42316	0.0112194
A0A3Q0IVQ8	A0A3Q0IVQ8|A0A3Q0IVQ8_DIACI	S	S(+79.97)SVMPTTLQEESASLK	1	16	LOW QUALITY PROTEIN: titin-like OS=Diaphorina citri OX=121845 GN=LOC103510529 PE=3 SV=1	LOW QUALITY PROTEIN: titin-like	LOC103510529	50.45	1786.81	3.2	3711	3726	S1:Phosphorylation (STY):0.00	S3711	FKIRRKSSVMPTT	1672.91	694.828	751.471	1039.74	2367.4	3051.57	1971.67	2463.55	0.422048	0.0334125
A0A3Q0INM2	A0A3Q0INM2|A0A3Q0INM2_DIACI	S	IIYPPSS(+79.97)NPT(+79.97)SPTMGR	7	16	Proteoglycan 4 OS=Diaphorina citri OX=121845 GN=LOC103524819 PE=4 SV=1	Proteoglycan 4	LOC103524819	47.97	1876.78	2	235	250	S7:Phosphorylation (STY):12.28;T10:Phosphorylation (STY):0.00	S241	IIYPPSSNPTSPT	12402.7	12878.3	9103.81	11461.6	25566	33422	23034.7	27340.9	0.41921	0.0089875
A0A3Q0INM2	A0A3Q0INM2|A0A3Q0INM2_DIACI	T	IIYPPSS(+79.97)NPT(+79.97)SPTMGR	10	16	Proteoglycan 4 OS=Diaphorina citri OX=121845 GN=LOC103524819 PE=4 SV=1	Proteoglycan 4	LOC103524819	47.97	1876.78	2	235	250	S7:Phosphorylation (STY):12.28;T10:Phosphorylation (STY):0.00	T244	PPSSNPTSPTMGR	12402.7	12878.3	9103.81	11461.6	25566	33422	23034.7	27340.9	0.41921	0.0089875
A0A1S3DUW4	A0A1S3DUW4|A0A1S3DUW4_DIACI	S	S(+79.97)TADIIAAQSQDYVDEK	1	17	Lysine-rich arabinogalactan protein 19-like OS=Diaphorina citri OX=121845 GN=LOC103524783 PE=4 SV=1	Lysine-rich arabinogalactan protein 19-like	LOC103524783	62.17	1932.84	1	107	123	S1:Phosphorylation (STY):0.00	S107	EPIDGRSTADIIA	4082.89	16683.5	15191.1	11985.8	22555.4	28462.6	34759.9	28592.7	0.419192	0.0353096
A0A1S3DH23	A0A1S3DH23|A0A1S3DH23_DIACI	S	DNNYFDDDIFQS(+79.97)FK	12	14	Uncharacterized protein LOC103518240 OS=Diaphorina citri OX=121845 GN=LOC103518240 PE=4 SV=1	Uncharacterized protein LOC103518240	LOC103518240	64.46	1846.71	4.4	690	703	S12:Phosphorylation (STY):96.04	S701	DDDIFQSFKSAFC	530.601	1168.04	1076.58	925.072	2833.02	1704.28	2092.48	2209.93	0.418598	0.0292097
A0A3Q0JKJ2	A0A3Q0JKJ2|A0A3Q0JKJ2_DIACI	S	KSES(+79.97)INIFK	4	9	Protein disabled-like OS=Diaphorina citri OX=121845 GN=LOC113473381 PE=4 SV=1	Protein disabled-like	LOC113473381	30.95	1144.55	-3.9	212	220	S4:Phosphorylation (STY):0.00	S215	QMKKSESINIFKQ	185.652	176.164	168.978	176.931	272.112	542.431	454.689	423.077	0.418201	0.0367214
A0A1S3D4W4	A0A1S3D4W4|A0A1S3D4W4_DIACI	S	FGLHQTDDRLS(+79.97)PR	11	13	Uncharacterized protein LOC103511395 OS=Diaphorina citri OX=121845 GN=LOC103511395 PE=4 SV=1	Uncharacterized protein LOC103511395	LOC103511395	41.46	1620.74	-5.3	380	392	S11:Phosphorylation (STY):10.19	S390	QTDDRLSPRVFSI	3124.25	5340.92	3060.02	3841.73	9614.1	8927.77	9037.17	9193.02	0.417896	0.00235745
A0A3Q0J270	A0A3Q0J270|A0A3Q0J270_DIACI	S	GSSSVNLS(+79.97)PPTLAR	8	14	Uncharacterized protein LOC103513646 OS=Diaphorina citri OX=121845 GN=LOC103513646 PE=4 SV=1	Uncharacterized protein LOC103513646	LOC103513646	42.02	1464.7	-3.9	401	414	S8:Phosphorylation (STY):12.33	S408	SSSVNLSPPTLAR	960.162	424.849	420.68	601.897	1245.03	1798.12	1280.93	1441.36	0.41759	0.0294382
A0A3Q0IV83	A0A3Q0IV83|A0A3Q0IV83_DIACI	S	VTIS(+79.97)GDDIPGGTDDSDHFYVR	4	21	Uncharacterized protein LOC113467901 OS=Diaphorina citri OX=121845 GN=LOC113467901 PE=4 SV=1	Uncharacterized protein LOC113467901	LOC113467901	64.73	2344.98	-1.1	122	142	S4:Phosphorylation (STY):39.76	S125	PLRVTISGDDIPG	16028.4	26248.8	19252.1	20509.8	36178.9	51058.7	60244.9	49160.8	0.417197	0.0198866
A0A1S3CUJ9	A0A1S3CUJ9|A0A1S3CUJ9_DIACI	S	SNS(+79.97)LEDVTQAR	3	11	Whirlin isoform X1 OS=Diaphorina citri OX=121845 GN=LOC103505552 PE=4 SV=2	Whirlin isoform X1	LOC103505552	49.76	1298.55	-3.5	284	294	S3:Phosphorylation (STY):17.01	S286	GNGRSNSLEDVTQ	136.531	179.96	119.123	145.205	376.976	299.288	371.948	349.404	0.415578	0.00273065
A0A1S3DP17	A0A1S3DP17|A0A1S3DP17_DIACI	S	VAVAASTGIPGGLGS(+79.97)PGLNGPVSTEDIKVPDK	15	32	Far upstream element-binding protein 1 OS=Diaphorina citri OX=121845 GN=LOC103521996 PE=4 SV=1	Far upstream element-binding protein 1	LOC103521996	43.22	3082.56	1.6	79	110	S15:Phosphorylation (STY):0.00	S93	IPGGLGSPGLNGP	948.373	2560.81	3785.28	2431.49	5527.19	6539.8	5545.18	5870.72	0.414171	0.0178819
A0A3Q0ITU5	A0A3Q0ITU5|A0A3Q0ITU5_DIACI	T	LVTPPNT(+79.97)PVEK	7	11	Muscle M-line assembly protein unc-89-like OS=Diaphorina citri OX=121845 GN=LOC113467622 PE=4 SV=1	Muscle M-line assembly protein unc-89-like	LOC113467622	33.91	1273.63	-0.8	464	474	T7:Phosphorylation (STY):25.11	T470	LVTPPNTPVEKSL	260.733	1264.86	1368.11	964.57	2503.22	2434.87	2070.03	2336.04	0.412908	0.0221772
A0A3Q0J5B7	A0A3Q0J5B7|A0A3Q0J5B7_DIACI	T	LPPPTEDPLDSAST(+79.97)PPAAK	14	19	Protein FAM76A OS=Diaphorina citri OX=121845 GN=LOC103513034 PE=3 SV=1	Protein FAM76A	LOC103513034	45.48	1982.92	1.4	193	211	T14:Phosphorylation (STY):0.00	T206	PLDSASTPPAAKT	7399.03	1112.1	9103.24	5871.46	15635.9	14170.9	12956.8	14254.5	0.411901	0.0303034
A0A1S4ESS1	A0A1S4ESS1|A0A1S4ESS1_DIACI:A0A3Q0IMK5|A0A3Q0IMK5_DIACI	T	T(+79.97)EGYGSYSSLQLAM(+15.99)K	1	15	Embryonic polarity protein dorsal-like isoform X1 OS=Diaphorina citri OX=121845 GN=LOC103524782 PE=4 SV=1	Embryonic polarity protein dorsal-like isoform X1	LOC103524782	32.61	1729.73	2.7	483	497	T1:Phosphorylation (STY):0.00;M14:Oxidation (M):1000.00	T483	EHLGQRTEGYGSY	369.485	718.296	482.941	523.574	1602.38	1290.12	939.42	1277.31	0.409905	0.0256158
A0A3Q0IQB5	A0A3Q0IQB5|A0A3Q0IQB5_DIACI	S	C(+57.02)MLSGS(+79.97)PDQVQEAR	6	14	Far upstream element-binding protein 1 OS=Diaphorina citri OX=121845 GN=LOC103507883 PE=4 SV=1	Far upstream element-binding protein 1	LOC103507883	61.66	1656.66	0.2	291	304	C1:Carbamidomethylation:1000.00;S6:Phosphorylation (STY):18.53	S296	RCMLSGSPDQVQE	797.479	521.151	607.958	642.196	1493.04	1899.16	1309.41	1567.2	0.409772	0.00859847
A0A3Q0JK09	A0A3Q0JK09|A0A3Q0JK09_DIACI	S	AASNSSQLS(+79.97)DTPENEVIDLTGGR	9	23	Histone deacetylase 4-like OS=Diaphorina citri OX=121845 GN=LOC103523301 PE=3 SV=1	Histone deacetylase 4-like	LOC103523301	46.5	2440.08	7.5	285	307	S9:Phosphorylation (STY):0.00	S293	SNSSQLSDTPENE	350.632	911.973	473.548	578.718	1017.28	1405.97	1828.02	1417.09	0.408385	0.0443129
A0A3Q0J476	A0A3Q0J476|A0A3Q0J476_DIACI:A0A3Q0JE78|A0A3Q0JE78_DIACI:A0A3Q0J8L3|A0A3Q0J8L3_DIACI	S	VS(+79.97)SAGAAYAAAPGR	2	14	RNA-binding protein squid-like isoform X1 OS=Diaphorina citri OX=121845 GN=LOC103514559 PE=4 SV=1	RNA-binding protein squid-like isoform X1	LOC103514559	59.23	1327.59	-1.1	197	210	S2:Phosphorylation (STY):0.00	S198	GAGARVSSAGAAY	250.747	166.373	140.354	185.825	319.568	482.755	563.034	455.119	0.408299	0.0270558
A0A1S3DMX5	A0A1S3DMX5|A0A1S3DMX5_DIACI	T	DATQT(+79.97)PVTALSPSR	5	14	Tyrosine-protein phosphatase non-receptor type 13-like OS=Diaphorina citri OX=121845 GN=LOC103521707 PE=4 SV=2	Tyrosine-protein phosphatase non-receptor type 13-like	LOC103521707	37.79	1522.7	3.7	35	48	T5:Phosphorylation (STY):0.00	T39	YRDATQTPVTALS	3237.59	2525.76	2921.03	2894.8	6332.73	6377.69	8563.22	7091.22	0.408223	0.00536319
A0A1S3DMX5	A0A1S3DMX5|A0A1S3DMX5_DIACI	S	DATQTPVTALS(+79.97)PSR	11	14	Tyrosine-protein phosphatase non-receptor type 13-like OS=Diaphorina citri OX=121845 GN=LOC103521707 PE=4 SV=2	Tyrosine-protein phosphatase non-receptor type 13-like	LOC103521707	59.98	1522.7	1.1	35	48	S11:Phosphorylation (STY):14.63	S45	TPVTALSPSRQHK	3237.59	2525.76	2921.03	2894.8	6332.73	6377.69	8563.22	7091.22	0.408223	0.00536319
A0A3Q0JAL1	A0A3Q0JAL1|A0A3Q0JAL1_DIACI	T	ALAALSAEGYT(+79.97)SPEPGK	11	17	Nesprin-1-like OS=Diaphorina citri OX=121845 GN=LOC103517667 PE=4 SV=1	Nesprin-1-like	LOC103517667	74.27	1740.8	1.4	122	138	T11:Phosphorylation (STY):14.02	T132	LSAEGYTSPEPGK	5321.76	22476.6	19738	15845.4	28471.8	39022.8	48992	38828.9	0.408084	0.0447317
A0A3Q0JAL1	A0A3Q0JAL1|A0A3Q0JAL1_DIACI	S	ALAALSAEGYTS(+79.97)PEPGK	12	17	Nesprin-1-like OS=Diaphorina citri OX=121845 GN=LOC103517667 PE=4 SV=1	Nesprin-1-like	LOC103517667	77.05	1740.8	4.4	122	138	S12:Phosphorylation (STY):33.98	S133	SAEGYTSPEPGKK	5321.76	22476.6	19738	15845.4	28471.8	39022.8	48992	38828.9	0.408084	0.0447317
A0A3Q0JJD2	A0A3Q0JJD2|A0A3Q0JJD2_DIACI	S	AHHPAS(+79.97)SGLEHFFDDDR	6	17	Uncharacterized protein LOC103520248 OS=Diaphorina citri OX=121845 GN=LOC103520248 PE=4 SV=1	Uncharacterized protein LOC103520248	LOC103520248	37.78	2016.81	-3.2	377	393	S6:Phosphorylation (STY):17.01	S382	KAHHPASSGLEHF	90.3192	292.421	321.301	234.68	590.284	631.714	506.859	576.286	0.407229	0.0137388
A0A1S3DCZ9	A0A1S3DCZ9|A0A1S3DCZ9_DIACI:A0A3Q0J5Z1|A0A3Q0J5Z1_DIACI	S	S(+79.97)AGIFDSFELPGGK	1	14	Uncharacterized protein LOC103515317 OS=Diaphorina citri OX=121845 GN=LOC103515317 PE=4 SV=1	Uncharacterized protein LOC103515317	LOC103515317	66.63	1503.66	-4.9	390	403	S1:Phosphorylation (STY):53.33	S390	PGGLQRSAGIFDS	118.823	929.928	1252.69	767.147	2338.66	1688.74	1655.55	1894.32	0.404973	0.0493104
A0A1S4ERF4	A0A1S4ERF4|A0A1S4ERF4_DIACI	T	SQLGNQRPLSDIT(+79.97)YIDEDPIK	13	21	Calcium-transporting ATPase OS=Diaphorina citri OX=121845 GN=LOC103523657 PE=3 SV=1	Calcium-transporting ATPase	LOC103523657	28.68	2481.18	2.7	1087	1107	T13:Phosphorylation (STY):0.00	T1099	RPLSDITYIDEDP	3146.99	1583.74	2349.12	2359.95	5740.54	6383.86	5442.76	5855.72	0.403016	0.00273528
A0A1S4EFA0	A0A1S4EFA0|A0A1S4EFA0_DIACI	S	RS(+79.97)PPAYGGSGFK	2	12	RNA-binding protein 39 isoform X1 OS=Diaphorina citri OX=121845 GN=LOC103512082 PE=4 SV=1	RNA-binding protein 39 isoform X1	LOC103512082	43.67	1302.58	-0.7	119	130	S2:Phosphorylation (STY):28.70	S120	ERDRRRSPPAYGG	303.424	460.38	455.342	406.382	840.727	848.899	1340.35	1009.99	0.402361	0.0251615
A0A3Q0JBE7	A0A3Q0JBE7|A0A3Q0JBE7_DIACI	S	NIQGNEENTPDISNTDQTSVQQQPS(+79.97)PQPTTSNAIK	25	35	RING-type E3 ubiquitin transferase OS=Diaphorina citri OX=121845 GN=LOC103518158 PE=4 SV=1	RING-type E3 ubiquitin transferase	LOC103518158	32.49	3860.73	5.5	158	192	S25:Phosphorylation (STY):4.73	S182	SVQQQPSPQPTTS	678.605	896.802	281.767	619.058	1546.34	1477.95	1598.13	1540.81	0.401774	0.00734866
A0A3Q0IPJ2	A0A3Q0IPJ2|A0A3Q0IPJ2_DIACI	S	TIS(+79.97)PEPEDGEVIVTSR	3	16	LOW QUALITY PROTEIN: obscurin-like OS=Diaphorina citri OX=121845 GN=LOC103507575 PE=3 SV=1	LOW QUALITY PROTEIN: obscurin-like	LOC103507575	71.19	1807.82	3.9	1785	1800	S3:Phosphorylation (STY):8.22	S1787	SLRKTISPEPEDG	25079.3	13480.1	23101.4	20553.6	47392.2	58016.3	48413.9	51274.1	0.400857	0.00337353
A0A3Q0J5R5	A0A3Q0J5R5|A0A3Q0J5R5_DIACI:A0A3Q0J0R2|A0A3Q0J0R2_DIACI	S	TSPS(+79.97)SQVEDSEFDM(+15.99)FAQSR	4	19	TOM1-like protein 2 isoform X1 OS=Diaphorina citri OX=121845 GN=LOC103512928 PE=3 SV=1	TOM1-like protein 2 isoform X1	LOC103512928	26.89	2242.87	-0.1	349	367	S4:Phosphorylation (STY):0.00;M14:Oxidation (M):1000.00	S352	PAKTSPSSQVEDS	428.552	497.87	429.733	452.052	1271.2	1062.74	1061.31	1131.75	0.399428	0.000755982
A0A1S4E746	A0A1S4E746|A0A1S4E746_DIACI	S	NFDIDEVC(+57.02)S(+79.97)TDNIGPGR	9	17	GATA zinc finger domain-containing protein 14-like OS=Diaphorina citri OX=121845 GN=LOC103505646 PE=4 SV=1	GATA zinc finger domain-containing protein 14-like	LOC103505646	73.24	1987.8	1.8	296	312	C8:Carbamidomethylation:1000.00;S9:Phosphorylation (STY):33.98	S304	DIDEVCSTDNIGP	15368.5	12078.1	18460.4	15302.3	30754.2	32150.6	52160	38354.9	0.398967	0.0322315
A0A3Q0JPY8	A0A3Q0JPY8|A0A3Q0JPY8_DIACI	S	RSS(+79.97)LPYDLVK	3	10	Uncharacterized protein LOC103524423 OS=Diaphorina citri OX=121845 GN=LOC103524423 PE=4 SV=1	Uncharacterized protein LOC103524423	LOC103524423	40.85	1256.62	-2.5	597	606	S3:Phosphorylation (STY):29.32	S599	GLPRRSSLPYDLV	3585.35	1677.16	4692.57	3318.36	7331.91	8557.74	9094.3	8327.98	0.398459	0.00807561
A0A3Q0J881	A0A3Q0J881|A0A3Q0J881_DIACI	T	IVEEVT(+79.97)EEVKEEVK	6	14	Neurofilament heavy polypeptide OS=Diaphorina citri OX=121845 GN=LOC103516499 PE=4 SV=1	Neurofilament heavy polypeptide	LOC103516499	48.13	1738.83	3.2	55	68		T60	KIVEEVTEEVKEE	100.597	254.081	56.2348	136.971	328.897	390.022	313.885	344.268	0.397862	0.0321653
A0A1S3CWD2	A0A1S3CWD2|A0A1S3CWD2_DIACI	S	IGS(+79.97)DYVITINTGK	3	13	Uncharacterized protein LOC103506481 OS=Diaphorina citri OX=121845 GN=LOC103506481 PE=4 SV=1	Uncharacterized protein LOC103506481	LOC103506481	69.45	1459.7	-1.1	135	147	S3:Phosphorylation (STY):46.20	S137	FRIKIGSDYVITI	4571.03	11879	6244.26	7564.77	17767.7	14639.6	24662.2	19023.2	0.397661	0.0361781
A0A3Q0JCJ3	A0A3Q0JCJ3|A0A3Q0JCJ3_DIACI	S	GS(+79.97)TTPPLSPAIAR	2	13	Uncharacterized protein LOC113471341 OS=Diaphorina citri OX=121845 GN=LOC113471341 PE=4 SV=1	Uncharacterized protein LOC113471341	LOC113471341	41.5	1346.66	-0.8	85	97	S2:Phosphorylation (STY):0.00	S86	PLLNRGSTTPPLS	452.497	631.426	706.957	596.96	1526.88	1827.54	1156.33	1503.58	0.397025	0.0121252
A0A1S3D4X6	A0A1S3D4X6|A0A1S3D4X6_DIACI	S	SQSFNIHGS(+79.97)PNR	9	12	DnaJ protein homolog 1 OS=Diaphorina citri OX=121845 GN=LOC103510628 PE=4 SV=1	DnaJ protein homolog 1	LOC103510628	69.44	1422.6	1.4	156	167	S9:Phosphorylation (STY):163.63	S164	SFNIHGSPNRAKD	9419.85	32995.5	22443.9	21619.7	46458.4	62880.8	54362.2	54567.1	0.396204	0.0165775
A0A3Q0IYR2	A0A3Q0IYR2|A0A3Q0IYR2_DIACI	S	LKDS(+79.97)IELK	4	8	LOW QUALITY PROTEIN: uncharacterized protein LOC113468551 OS=Diaphorina citri OX=121845 GN=LOC113468551 PE=4 SV=1	LOW QUALITY PROTEIN: uncharacterized protein LOC113468551	LOC113468551	31.9	1024.52	-6.3	565	572		S568	KLKLKDSIELKKE	246.299	295.37	112.244	217.971	588.099	538.983	524.508	550.53	0.395929	0.00458608
A0A1S4EHK4	A0A1S4EHK4|A0A1S4EHK4_DIACI	S	LS(+79.97)SSPSSGLYSTSPK	2	15	UBA-like domain-containing protein 2 OS=Diaphorina citri OX=121845 GN=LOC103514398 PE=3 SV=1	UBA-like domain-containing protein 2	LOC103514398	48.11	1576.7	-0.3	88	102	S2:Phosphorylation (STY):0.00	S89	GEKNKLSSSPSSG	3427.56	4130.21	3249.22	3602.33	9425.11	8631.39	9249.95	9102.15	0.395767	0.000108172
A0A1S3DH23	A0A1S3DH23|A0A1S3DH23_DIACI	S	SAFC(+57.02)DTELTAAQHGETS(+79.97)FHIK	17	21	Uncharacterized protein LOC103518240 OS=Diaphorina citri OX=121845 GN=LOC103518240 PE=4 SV=1	Uncharacterized protein LOC103518240	LOC103518240	47.95	2429.04	-0.7	704	724	C4:Carbamidomethylation:1000.00;S17:Phosphorylation (STY):0.00	S720	AQHGETSFHIKRN		506.998	159.036	333.017	861.435	790.121	873.64	841.732	0.395633	0.0320623
A0A3Q0IWV0	A0A3Q0IWV0|A0A3Q0IWV0_DIACI	S	DSSDLTYNTS(+79.97)TPS(+79.97)SR	10	15	Protein stoned-B OS=Diaphorina citri OX=121845 GN=LOC103511042 PE=3 SV=1	Protein stoned-B	LOC103511042	65.2	1789.64	0.3	319	333	S10:Phosphorylation (STY):10.11;S13:Phosphorylation (STY):10.11	S328	DLTYNTSTPSSRK	3936.78	1340.67	4056.61	3111.35	7594.78	8815.78	7200.8	7870.45	0.395321	0.00924622
A0A3Q0IWV0	A0A3Q0IWV0|A0A3Q0IWV0_DIACI	S	DSSDLTYNTS(+79.97)TPS(+79.97)SR	13	15	Protein stoned-B OS=Diaphorina citri OX=121845 GN=LOC103511042 PE=3 SV=1	Protein stoned-B	LOC103511042	65.2	1789.64	0.3	319	333	S10:Phosphorylation (STY):10.11;S13:Phosphorylation (STY):10.11	S331	YNTSTPSSRKASI	3936.78	1340.67	4056.61	3111.35	7594.78	8815.78	7200.8	7870.45	0.395321	0.00924622
A0A3Q0IZW7	A0A3Q0IZK0|A0A3Q0IZK0_DIACI:A0A3Q0IZW7|A0A3Q0IZW7_DIACI	T	FHT(+79.97)ITTSYYR	3	10	Ras-related protein Rab-10 OS=Diaphorina citri OX=121845 GN=LOC103510043 PE=4 SV=1	Ras-related protein Rab-10	LOC103510043	34.47	1367.59	-1.5	71	80	T3:Phosphorylation (STY):14.04	T73	GQERFHTITTSYY	159.979	684.306	415.359	419.881	1155.69	1145.13	885.915	1062.25	0.395276	0.0214606
A0A1S3D2B7	A0A1S3D2B7|A0A1S3D2B7_DIACI	S	KSVS(+79.97)FVGESSQR	4	12	Uncharacterized protein LOC103509977 isoform X3 OS=Diaphorina citri OX=121845 GN=LOC103509977 PE=4 SV=2	Uncharacterized protein LOC103509977 isoform X3	LOC103509977	32.33	1389.63	-1.4	73	84	S4:Phosphorylation (STY):0.00	S76	LTRKSVSFVGESS	286.992	170.653	504.901	320.849	798.985	818.342	820.091	812.473	0.394904	0.00745577
A0A3Q0JD32	A0A3Q0JD32|A0A3Q0JD32_DIACI	S	IEEPLPLPS(+79.97)PTNLSVK	9	16	Patj homolog OS=Diaphorina citri OX=121845 GN=LOC113470420 PE=4 SV=1	Patj homolog	LOC113470420	64.36	1812.93	4.6	272	287	S9:Phosphorylation (STY):9.40	S280	EPLPLPSPTNLSV	597.34	6637.75	6451.94	4562.34	12759.9	10176.1	11731	11555.7	0.394815	0.0299982
A0A3Q0IZP5	A0A3Q0IZP5|A0A3Q0IZP5_DIACI	T	T(+79.97)TSTDEETNAEAVATTAGK	1	19	Glycogen [starch] synthase OS=Diaphorina citri OX=121845 GN=LOC103512410 PE=3 SV=1	Glycogen [starch] synthase	LOC103512410	52.9	1975.83	8.2	1226	1244	T1:Phosphorylation (STY):0.00	T1226	DVAKTRTTSTDEE	106.771	249.707	385.898	247.458	543.338	690.229	648.567	627.378	0.394433	0.0143275
A0A3Q0IN52	A0A3Q0IN52|A0A3Q0IN52_DIACI	S	S(+79.97)ET(+79.97)IDEIVNIKPR	1	13	LOW QUALITY PROTEIN: titin OS=Diaphorina citri OX=121845 GN=LOC103524768 PE=4 SV=1	LOW QUALITY PROTEIN: titin	LOC103524768	60.76	1672.75	2.4	1432	1444		S1432	SSRYKKSETIDEI	1691.76	916.668	1245.73	1284.72	3285.27	3582.99	2945.86	3271.37	0.392716	0.00238818
A0A3Q0IN52	A0A3Q0IN52|A0A3Q0IN52_DIACI	T	S(+79.97)ET(+79.97)IDEIVNIKPR	3	13	LOW QUALITY PROTEIN: titin OS=Diaphorina citri OX=121845 GN=LOC103524768 PE=4 SV=1	LOW QUALITY PROTEIN: titin	LOC103524768	60.76	1672.75	2.4	1432	1444		T1434	RYKKSETIDEIVN	1691.76	916.668	1245.73	1284.72	3285.27	3582.99	2945.86	3271.37	0.392716	0.00238818
A0A3Q0IQ83	A0A3Q0IQ83|A0A3Q0IQ83_DIACI	S	TSSEGIAQWQGNNLLTPS(+79.97)NEK	18	21	Tyrosine--tRNA ligase OS=Diaphorina citri OX=121845 GN=LOC103507806 PE=3 SV=1	Tyrosine--tRNA ligase	LOC103507806	30.84	2353.06	3.7	503	523	S18:Phosphorylation (STY):11.10	S520	NNLLTPSNEKLTC	57.2651	252.954	122.736	144.318	403.455	411.405	288.703	367.854	0.392325	0.0328945
A0A3Q0IZK0	A0A3Q0IZK0|A0A3Q0IZK0_DIACI	T	ST(+79.97)EPEANITGLQEGKPYK	2	18	LOW QUALITY PROTEIN: twitchin-like OS=Diaphorina citri OX=121845 GN=LOC103512392 PE=4 SV=1	LOW QUALITY PROTEIN: twitchin-like	LOC103512392	37.04	2040.94	-0.2	3069	3086	T2:Phosphorylation (STY):0.00	T3070	IPCGKSTEPEANI	1015.86	646.788	586.975	749.874	2009.35	2356.58	1386.95	1917.63	0.391042	0.0204394
A0A3Q0IIL1	A0A3Q0IIL1|A0A3Q0IIL1_DIACI	S	KIETES(+79.97)EDDWYDS(+79.97)WDEK	6	17	Uncharacterized protein LOC103524929 OS=Diaphorina citri OX=121845 GN=LOC103524929 PE=4 SV=1	Uncharacterized protein LOC103524929	LOC103524929	27.6	2333.83	3.2	855	871	S6:Phosphorylation (STY):5.81;S13:Phosphorylation (STY):20.41	S860	RKIETESEDDWYD	1261.8	2953.74	4529.5	2915.01	6412.67	9605.13	6350.2	7456	0.390962	0.0336872
A0A3Q0IIL1	A0A3Q0IIL1|A0A3Q0IIL1_DIACI	S	KIETES(+79.97)EDDWYDS(+79.97)WDEK	13	17	Uncharacterized protein LOC103524929 OS=Diaphorina citri OX=121845 GN=LOC103524929 PE=4 SV=1	Uncharacterized protein LOC103524929	LOC103524929	27.6	2333.83	3.2	855	871	S6:Phosphorylation (STY):5.81;S13:Phosphorylation (STY):20.41	S867	EDDWYDSWDEK__	1261.8	2953.74	4529.5	2915.01	6412.67	9605.13	6350.2	7456	0.390962	0.0336872
A0A3Q0JCJ3	A0A3Q0JCJ3|A0A3Q0JCJ3_DIACI	T	GSTT(+79.97)PPLSPAIAR	4	13	Uncharacterized protein LOC113471341 OS=Diaphorina citri OX=121845 GN=LOC113471341 PE=4 SV=1	Uncharacterized protein LOC113471341	LOC113471341	49.1	1346.66	-4.4	85	97	T4:Phosphorylation (STY):5.99	T88	LNRGSTTPPLSPA	452.497	631.426	706.957	596.96	1526.88	1908.3	1156.33	1530.51	0.390041	0.0153228
A0A1S3DNW4	A0A1S3DNW4|A0A1S3DNW4_DIACI	S	S(+79.97)PSLEAEMIINEDVTHETR	1	19	Uncharacterized protein OS=Diaphorina citri OX=121845 GN=LOC103522202 PE=4 SV=1	Uncharacterized protein	LOC103522202	31.09	2249.99	0.6	265	283	S1:Phosphorylation (STY):0.00	S265	QQELWRSPSLEAE	3085.22	7599.42	4105.75	4930.13	9777.85	15459	12718	12651.6	0.389684	0.0224285
A0A1S3DHM6	A0A1S3DHM6|A0A1S3DHM6_DIACI	S	ELC(+57.02)TSDTDS(+79.97)NFATTK	9	15	Uncharacterized protein LOC103518777 isoform X1 OS=Diaphorina citri OX=121845 GN=LOC103518777 PE=4 SV=1	Uncharacterized protein LOC103518777 isoform X1	LOC103518777	48.14	1768.69	4.3	70	84	C3:Carbamidomethylation:1000.00;S9:Phosphorylation (STY):14.04	S78	CTSDTDSNFATTK	242.407	435.978	255.384	311.256	700.322	655.373	1050.73	802.141	0.388032	0.0245943
A0A3Q0IWY9	A0A3Q0IWY9|A0A3Q0IWY9_DIACI	S	HS(+79.97)WNSFDK	2	8	Uncharacterized protein LOC103508545 OS=Diaphorina citri OX=121845 GN=LOC103508545 PE=4 SV=1	Uncharacterized protein LOC103508545	LOC103508545	37.25	1099.41	-3.4	154	161	S2:Phosphorylation (STY):30.41	S155	KREYRHSWNSFDK	736.206	324.446	472.777	511.143	1696.13	838.929	1419.44	1318.17	0.387768	0.0448245
A0A3Q0J3F5	A0A3Q0J3F5|A0A3Q0J3F5_DIACI:A0A3Q0J8A6|A0A3Q0J8A6_DIACI:A0A3Q0J3F9|A0A3Q0J3F9_DIACI:A0A3Q0J7M0|A0A3Q0J7M0_DIACI:A0A3Q0J3A5|A0A3Q0J3A5_DIACI	S	DDEEEENPIYLKIS(+79.97)DDEEEK	14	20	Troponin T isoform X5 OS=Diaphorina citri OX=121845 GN=LOC103514096 PE=3 SV=1	Troponin T isoform X5	LOC103514096	76.09	2518.02	-4.8	338	357	S14:Phosphorylation (STY):4.08	S351	PIYLKISDDEEEK	4597.1	10266.4	6737.93	7200.46	15638.7	23404.9	16753.2	18598.9	0.387144	0.0177713
A0A3Q0JP44	A0A3Q0JP44|A0A3Q0JP44_DIACI	S	S(+79.97)SVSSSETSFVTAR	1	14	Uncharacterized protein LOC113465373 OS=Diaphorina citri OX=121845 GN=LOC113465373 PE=4 SV=1	Uncharacterized protein LOC113465373	LOC113465373	35.84	1523.65	6.6	100	113	S1:Phosphorylation (STY):0.00	S100	SSFVSRSSVSSSE	455.803	240.567	383.032	359.801	1273.38	820.325	695.961	929.889	0.386929	0.0377754
A0A3Q0IHK6	A0A3Q0IHK6|A0A3Q0IHK6_DIACI:A0A1S3DTN1|A0A1S3DTN1_DIACI	S	S(+79.97)SLPDVAATMQK	1	12	Uncharacterized protein LOC103524460 isoform X2 OS=Diaphorina citri OX=121845 GN=LOC103524460 PE=4 SV=1	Uncharacterized protein LOC103524460 isoform X2	LOC103524460	59.58	1326.59	-3.8	134	145	S1:Phosphorylation (STY):0.00	S134	PQDKPRSSLPDVA	2028.18	1948.42	2596.17	2190.92	5876.15	6103.46	5016.98	5665.53	0.386711	0.00086571
A0A3Q0J027	A0A3Q0J3P0|A0A3Q0J3P0_DIACI:A0A3Q0J027|A0A3Q0J027_DIACI	S	VQS(+79.97)LTGQAR	3	9	Synapsin-like OS=Diaphorina citri OX=121845 GN=LOC103512552 PE=3 SV=1	Synapsin-like	LOC103512552	50.58	1038.49	-5.3	157	165	S3:Phosphorylation (STY):54.01	S159	LLQRVQSLTGQAR	7836.38	4445.97	4851.24	5711.2	15224.7	14082.9	15026.4	14778	0.386466	0.00128954
A0A1S3DQY5	A0A1S3DQY5|A0A1S3DQY5_DIACI	S	KDTATSGVPFYS(+79.97)LTNLNAYK	12	20	Outer dense fiber protein 3-like protein 2 OS=Diaphorina citri OX=121845 GN=LOC103523167 PE=4 SV=1	Outer dense fiber protein 3-like protein 2	LOC103523167	62.63	2269.07	-3.8	79	98	S12:Phosphorylation (STY):8.14	S90	SGVPFYSLTNLNA	2825.25	11802.1	6548.49	7058.61	15153.4	18295.5	21436.4	18295.1	0.385819	0.0239937
A0A1S4EFL3	A0A1S4EFL3|A0A1S4EFL3_DIACI	S	S(+79.97)QQQQGIIYHR	1	11	Uncharacterized protein LOC103512652 OS=Diaphorina citri OX=121845 GN=LOC103512652 PE=4 SV=2	Uncharacterized protein LOC103512652	LOC103512652	65.93	1436.66	0.5	328	338	S1:Phosphorylation (STY):89.48	S328	NLQQTKSQQQQGI	1169.63	1780.32	1701.86	1550.61	3213.08	3669.39	5242.77	4041.75	0.383647	0.0180224
A0A3Q0JC75	A0A3Q0JC75|A0A3Q0JC75_DIACI	S	ASISS(+79.97)SIPSLQEDK	5	14	Adiponectin receptor protein-like OS=Diaphorina citri OX=121845 GN=LOC103518450 PE=3 SV=1	Adiponectin receptor protein-like	LOC103518450	24.37	1540.7	-0.6	29	42	S5:Phosphorylation (STY):0.00	S33	DKASISSSIPSLQ	119.178	105.923	517.751	247.617	606.168	736.846	593.349	645.455	0.383632	0.0494034
A0A3Q0IPJ2	A0A3Q0IPJ2|A0A3Q0IPJ2_DIACI	S	IGDDEAEVLS(+79.97)RK	10	12	LOW QUALITY PROTEIN: obscurin-like OS=Diaphorina citri OX=121845 GN=LOC103507575 PE=3 SV=1	LOW QUALITY PROTEIN: obscurin-like	LOC103507575	47.36	1410.64	1	2027	2038		S2036	DEAEVLSRKTSRQ	62.7696	466.124	243.693	257.529	584.01	649.426	783.88	672.439	0.382977	0.0336656
A0A3Q0IPJ2	A0A3Q0IPJ2|A0A3Q0IPJ2_DIACI	T	M(+15.99)IYPPGTQFTPEPT(+79.97)PDK	14	17	LOW QUALITY PROTEIN: obscurin-like OS=Diaphorina citri OX=121845 GN=LOC103507575 PE=3 SV=1	LOW QUALITY PROTEIN: obscurin-like	LOC103507575	28.83	2013.88	0.2	5128	5144	M1:Oxidation (M):1000.00;T14:Phosphorylation (STY):8.82	T5141	QFTPEPTPDKVLV	66.4582	39.9921	85.251	63.9005	110.801	189.425	200.408	166.878	0.382918	0.0296849
A0A3Q0IQW5	A0A3Q0IQW5|A0A3Q0IQW5_DIACI	S	C(+57.02)LS(+79.97)PYDNLLENC(+57.02)TIR	3	15	Uncharacterized protein LOC108252263 OS=Diaphorina citri OX=121845 GN=LOC108252263 PE=4 SV=1	Uncharacterized protein LOC108252263	LOC108252263	55.9	1946.83	3.3	595	609	C1:Carbamidomethylation:1000.00;S3:Phosphorylation (STY):22.85;C12:Carbamidomethylation:1000.00	S597	PETKCLSPYDNLL	241.816	82.6632	464.736	263.072	521.347	851.864	687.995	687.069	0.38289	0.0441343
A0A3Q0ITW8	A0A3Q0ITW8|A0A3Q0ITW8_DIACI	S	RLFNEDS(+79.97)NSGIENK	7	14	Uncharacterized protein LOC103507446 OS=Diaphorina citri OX=121845 GN=LOC103507446 PE=4 SV=1	Uncharacterized protein LOC103507446	LOC103507446	53.91	1701.74	0.7	173	186	S7:Phosphorylation (STY):20.63	S179	RLFNEDSNSGIEN	6458.34	16616.8	11943.4	11672.8	22961.7	27362.7	41422.9	30582.4	0.381684	0.0397641
A0A3Q0IXQ1	A0A3Q0IXQ1|A0A3Q0IXQ1_DIACI	S	ESTDS(+79.97)STTLEDDDIK	5	15	calcium/calmodulin-dependent protein kinase OS=Diaphorina citri OX=121845 GN=LOC103509280 PE=3 SV=1	calcium/calmodulin-dependent protein kinase	LOC103509280	64.12	1734.67	1.6	314	328	S5:Phosphorylation (STY):8.14	S318	VKESTDSSTTLED	8886.63	5809.71	529.693	5075.34	12921	12016.8	15135.5	13357.8	0.379954	0.0337557
A0A1S3D3S3	A0A1S3D3S3|A0A1S3D3S3_DIACI	S	TSVTAPFASIEDLS(+79.97)PEEETTC(+57.02)SR	14	23	Uncharacterized protein LOC103510849 OS=Diaphorina citri OX=121845 GN=LOC103510849 PE=4 SV=1	Uncharacterized protein LOC103510849	LOC103510849	30.09	2606.11	-4.9	27	49	S14:Phosphorylation (STY):10.19;C21:Carbamidomethylation:1000.00	S40	ASIEDLSPEEETT	581.696	657.717	1293.93	844.449	2365.37	2661.02	1683.53	2236.64	0.377552	0.0192277
A0A3Q0IIL1	A0A3Q0IIL1|A0A3Q0IIL1_DIACI	T	RPT(+79.97)TSPPPPPVTK	3	13	Uncharacterized protein LOC103524929 OS=Diaphorina citri OX=121845 GN=LOC103524929 PE=4 SV=1	Uncharacterized protein LOC103524929	LOC103524929	47.45	1453.73	8.6	321	333	T3:Phosphorylation (STY):0.00	T323	ASGKRPTTSPPPP	1250.92	1052.54	4585.31	2296.26	5149.44	6116.85	6981.15	6082.48	0.37752	0.0399524
A0A1S3D4W4	A0A1S3D4W4|A0A1S3D4W4_DIACI:A0A3Q0J108|A0A3Q0J108_DIACI	S	IPTC(+57.02)S(+79.97)SMTTLK	5	11	Uncharacterized protein LOC103511395 OS=Diaphorina citri OX=121845 GN=LOC103511395 PE=4 SV=1	Uncharacterized protein LOC103511395	LOC103511395	34.53	1317.57	-4.4	173	183	C4:Carbamidomethylation:1000.00;S5:Phosphorylation (STY):0.00	S177	YRIPTCSSMTTLK	2689.08	8024.29	4730.13	5147.83	10693.2	11828.3	18448.5	13656.7	0.376947	0.0415557
A0A3Q0IWJ2	A0A3Q0IWJ2|A0A3Q0IWJ2_DIACI	S	LC(+57.02)AS(+79.97)LPNYLEK	4	11	Multiple PDZ domain protein-like OS=Diaphorina citri OX=121845 GN=LOC103508710 PE=4 SV=1	Multiple PDZ domain protein-like	LOC103508710	60.41	1386.63	0.5	183	193	C2:Carbamidomethylation:1000.00;S4:Phosphorylation (STY):38.03	S186	RYKLCASLPNYLE	106.239	847.652	1298.07	750.653	1653.07	1900.05	2421.15	1991.42	0.376943	0.0402587
A0A1S3DLS5	A0A1S3DLS5|A0A1S3DLS5_DIACI	S	S(+79.97)NSVPIINTTMASTSTATNAPPVER	1	25	Protein FAM122A OS=Diaphorina citri OX=121845 GN=LOC103521125 PE=3 SV=1	Protein FAM122A	LOC103521125	37.2	2638.23	2.8	19	43	S1:Phosphorylation (STY):0.00	S19	PNTLKRSNSVPII	63.6874	450.81	1129.98	548.158	1546.32	1424.44	1405.71	1458.82	0.375753	0.0444107
A0A1S4EDL1	A0A1S4EDL1|A0A1S4EDL1_DIACI	S	NS(+79.97)LPLSSQPR	2	10	Ras GTPase-activating protein-binding protein 1 isoform X1 OS=Diaphorina citri OX=121845 GN=LOC103511029 PE=4 SV=1	Ras GTPase-activating protein-binding protein 1 isoform X1	LOC103511029	48.9	1177.55	-7.9	334	343	S2:Phosphorylation (STY):64.94	S335	LPPTRNSLPLSSQ	329.196	109.56	95.4379	178.065	578.467	508.009	336.147	474.208	0.375499	0.0470673
A0A1S3CZB2	A0A1S3CZB2|A0A1S3CZB2_DIACI	S	WS(+79.97)QPSS(+79.97)PQINGNGAPIQSK	2	19	Activating signal cointegrator 1 complex subunit 2 homolog OS=Diaphorina citri OX=121845 GN=LOC103508170 PE=4 SV=1	Activating signal cointegrator 1 complex subunit 2 homolog	LOC103508170	39.93	2154.91	-7.6	278	296	S2:Phosphorylation (STY):13.38;S6:Phosphorylation (STY):11.06	S279	NSSGRWSQPSSPQ	536.948	1847.94	3055.67	1813.52	4146.39	4674.12	5686.29	4835.6	0.375034	0.0242386
A0A1S3CZB2	A0A1S3CZB2|A0A1S3CZB2_DIACI	S	WS(+79.97)QPSS(+79.97)PQINGNGAPIQSK	6	19	Activating signal cointegrator 1 complex subunit 2 homolog OS=Diaphorina citri OX=121845 GN=LOC103508170 PE=4 SV=1	Activating signal cointegrator 1 complex subunit 2 homolog	LOC103508170	39.93	2154.91	-7.6	278	296	S2:Phosphorylation (STY):13.38;S6:Phosphorylation (STY):11.06	S283	RWSQPSSPQINGN	536.948	1847.94	3055.67	1813.52	4146.39	4674.12	5686.29	4835.6	0.375034	0.0242386
A0A1S3DHH7	A0A1S3DHH7|A0A1S3DHH7_DIACI	S	KPTGAS(+79.97)KSSIS(+79.97)IVGYK	6	16	Vicilin-like seed storage protein At2g18540 OS=Diaphorina citri OX=121845 GN=LOC103517821 PE=4 SV=1	Vicilin-like seed storage protein At2g18540	LOC103517821	39.32	1781.84	4.2	353	368	S6:Phosphorylation (STY):0.00;S11:Phosphorylation (STY):9.40	S358	KKPTGASKSSISI	166.671	5601.51	5391.6	3719.93	8367.63	10111.3	11477.8	9985.55	0.372531	0.0346942
A0A1S3DHH7	A0A1S3DHH7|A0A1S3DHH7_DIACI	S	KPTGAS(+79.97)KSSIS(+79.97)IVGYK	11	16	Vicilin-like seed storage protein At2g18540 OS=Diaphorina citri OX=121845 GN=LOC103517821 PE=4 SV=1	Vicilin-like seed storage protein At2g18540	LOC103517821	39.32	1781.84	4.2	353	368	S6:Phosphorylation (STY):0.00;S11:Phosphorylation (STY):9.40	S363	ASKSSISIVGYKN	166.671	5601.51	5391.6	3719.93	8367.63	10111.3	11477.8	9985.55	0.372531	0.0346942
A0A3Q0JJD2	A0A3Q0JJD2|A0A3Q0JJD2_DIACI	S	DEPS(+79.97)VSDEMEPPPLGIFK	4	18	Uncharacterized protein LOC103520248 OS=Diaphorina citri OX=121845 GN=LOC103520248 PE=4 SV=1	Uncharacterized protein LOC103520248	LOC103520248	64.77	2065.9	0.6	621	638	S4:Phosphorylation (STY):0.00	S624	FPRDEPSVSDEME	765.127	11038.6	9796.25	7200	19609	15690.4	22687	19328.8	0.372502	0.0336486
A0A1S3D2Q9	A0A1S3D2Q9|A0A1S3D2Q9_DIACI:A0A3Q0IV56|A0A3Q0IV56_DIACI	S	GEGASVSFPS(+79.97)SPMLPR	10	16	Metal transporter CNNM4-like OS=Diaphorina citri OX=121845 GN=LOC103510268 PE=4 SV=1	Metal transporter CNNM4-like	LOC103510268	60.5	1697.75	-0.3	144	159	S10:Phosphorylation (STY):0.00	S153	ASVSFPSSPMLPR	2186.06	508.348	2563.52	1752.64	4371.62	5765.19	3985.67	4707.49	0.372309	0.0237013
A0A1S3CYW5	A0A1S3CYW5|A0A1S3CYW5_DIACI	S	SPASVPDIC(+57.02)DSPC(+57.02)S(+79.97)PQK	14	17	Vegetative cell wall protein gp1-like isoform X1 OS=Diaphorina citri OX=121845 GN=LOC103507934 PE=4 SV=1	Vegetative cell wall protein gp1-like isoform X1	LOC103507934	26.96	1923.77	1.2	81	97	C9:Carbamidomethylation:1000.00;C13:Carbamidomethylation:1000.00;S14:Phosphorylation (STY):9.42	S94	ICDSPCSPQKSCS	287.741	393.189	437.097	372.676	677.837	1326.86	1001.95	1002.22	0.371852	0.0307926
A0A1S3D8C7	A0A1S3D8C7|A0A1S3D8C7_DIACI	S	VSIAQSAS(+79.97)STNVNK	8	14	KxDL motif-containing protein CG10681 OS=Diaphorina citri OX=121845 GN=LOC103513506 PE=3 SV=1	KxDL motif-containing protein CG10681	LOC103513506	40.17	1484.69	-2.1	136	149	S8:Phosphorylation (STY):0.00	S143	SIAQSASSTNVNK	359.58	126.262	674.025	386.622	1029.22	1230.49	873.031	1044.25	0.370239	0.0255547
A0A3Q0IVL2	A0A3Q0IVL2|A0A3Q0IVL2_DIACI	S	QDILTSS(+79.97)GVTLAGNR	7	15	Profilin OS=Diaphorina citri OX=121845 GN=LOC103507846 PE=3 SV=1	Profilin	LOC103507846	65	1610.77	-0.6	38	52	S7:Phosphorylation (STY):12.28	S44	QDILTSSGVTLAG	835.359	2586.42	2185.18	1868.99	4616.08	4152.51	6386.6	5051.73	0.36997	0.0210155
A0A1S3CTU6	A0A1S3CTU6|A0A1S3CTU6_DIACI	S	IYVPYESPSQS(+79.97)PK	11	13	USP6 N-terminal-like protein isoform X1 OS=Diaphorina citri OX=121845 GN=LOC103505132 PE=4 SV=1	USP6 N-terminal-like protein isoform X1	LOC103505132	51.03	1573.71	4.6	539	551	S11:Phosphorylation (STY):6.59	S549	YESPSQSPKKSPK	257.645	319.311	367.349	314.768	718.385	1117.4	719.319	851.701	0.369576	0.017089
A0A3Q0J5X2	A0A3Q0J5X2|A0A3Q0J5X2_DIACI	S	NS(+79.97)YVVNMADQEENK	2	14	Amino acid transporter OS=Diaphorina citri OX=121845 GN=LOC103515335 PE=3 SV=1	Amino acid transporter	LOC103515335	62.8	1719.68	-0.2	28	41	S2:Phosphorylation (STY):12.28	S29	DSKPKNSYVVNMA	1513.4	3009.21	3004.99	2509.2	4570.57	7366.47	8450.11	6795.72	0.369232	0.0271192
A0A1S3DTG1	A0A1S3DTG1|A0A1S3DTG1_DIACI:A0A3Q0JQP4|A0A3Q0JQP4_DIACI	S	KTDS(+79.97)IPDYNFNVLR	4	14	Coiled-coil domain-containing protein 81-like isoform X1 OS=Diaphorina citri OX=121845 GN=LOC103524338 PE=4 SV=1	Coiled-coil domain-containing protein 81-like isoform X1	LOC103524338	26.48	1760.81	5.8	567	580	S4:Phosphorylation (STY):11.10	S570	TNKKTDSIPDYNF	65.0962	679.119	687.367	477.194	1189.22	1319.89	1376.87	1295.32	0.368398	0.0185629
A0A3Q0IMA2	A0A3Q0IMA2|A0A3Q0IMA2_DIACI	T	LLPT(+79.97)PDDIER	4	10	Uncharacterized protein LOC103524605 isoform X1 OS=Diaphorina citri OX=121845 GN=LOC103524605 PE=4 SV=1	Uncharacterized protein LOC103524605 isoform X1	LOC103524605	40.21	1247.58	-3.7	13	22		T16	EDKLLPTPDDIER	3127.86	3040.09	2871.07	3013.01	10801.6	6713.92	7174.84	8230.13	0.366095	0.0157431
A0A1S3DA59	A0A1S3DA59|A0A1S3DA59_DIACI:A0A1S4EHR3|A0A1S4EHR3_DIACI:A0A1S3DA52|A0A1S3DA52_DIACI	S	KNLGGAEAAEEVLS(+79.97)T(+79.97)EEEEEEE	14	22	Uncharacterized abhydrolase domain-containing protein DDB_G0269086-like isoform X3 OS=Diaphorina citri OX=121845 GN=LOC103514494 PE=4 SV=1	Uncharacterized abhydrolase domain-containing protein DDB_G0269086-like isoform X3	LOC103514494	81.61	2550.98	1.7	394	415		S407	AAEEVLSTEEEEE	7929.43	30387.4	52000	30105.6	68671.9	104672	73376.8	82240.1	0.36607	0.0375106
A0A1S3DA59	A0A1S3DA59|A0A1S3DA59_DIACI:A0A1S4EHR3|A0A1S4EHR3_DIACI:A0A1S3DA52|A0A1S3DA52_DIACI	T	KNLGGAEAAEEVLS(+79.97)T(+79.97)EEEEEEE	15	22	Uncharacterized abhydrolase domain-containing protein DDB_G0269086-like isoform X3 OS=Diaphorina citri OX=121845 GN=LOC103514494 PE=4 SV=1	Uncharacterized abhydrolase domain-containing protein DDB_G0269086-like isoform X3	LOC103514494	81.61	2550.98	1.7	394	415		T408	AEEVLSTEEEEEE	7929.43	30387.4	52000	30105.6	68671.9	104672	73376.8	82240.1	0.36607	0.0375106
A0A1S4EFL3	A0A1S4EFL3|A0A1S4EFL3_DIACI	T	NLQQMETQSNVKPLT(+79.97)GSER	15	19	Uncharacterized protein LOC103512652 OS=Diaphorina citri OX=121845 GN=LOC103512652 PE=4 SV=2	Uncharacterized protein LOC103512652	LOC103512652	46.56	2239.03	-5	244	262	T15:Phosphorylation (STY):8.22	T258	SNVKPLTGSERNL	2640.13	5772.21	4699.38	4370.57	7241.71	13887.1	14694	11940.9	0.366016	0.0404216
A0A1S3D2G8	A0A1S3D2G8|A0A1S3D2G8_DIACI:A0A1S3D400|A0A1S3D400_DIACI	S	FQYLGS(+79.97)GDLGK	6	11	Uncharacterized protein LOC103510100 isoform X2 OS=Diaphorina citri OX=121845 GN=LOC103510100 PE=4 SV=1	Uncharacterized protein LOC103510100 isoform X2	LOC103510100	47.27	1263.55	-2.6	128	138	S6:Phosphorylation (STY):49.37	S133	RFQYLGSGDLGKV	2774.4	5226.46	4050.12	4016.99	11022.5	8902.16	13003.5	10976.1	0.365978	0.00726247
A0A3Q0INZ3	A0A3Q0INZ3|A0A3Q0INZ3_DIACI	S	IM(+15.99)EAVES(+79.97)GS(+79.97)ESR	7	12	acetyl-CoA carboxylase OS=Diaphorina citri OX=121845 GN=LOC103507248 PE=4 SV=1	acetyl-CoA carboxylase	LOC103507248	45.18	1469.51	8.8	503	514	M2:Oxidation (M):1000.00;S7:Phosphorylation (STY):11.12;S9:Phosphorylation (STY):14.04	S509	IMEAVESGSESRN	587.297	130.886	1707.68	808.62	2191.12	2313.39	2127.62	2210.71	0.365774	0.0410202
A0A3Q0INZ3	A0A3Q0INZ3|A0A3Q0INZ3_DIACI	S	IM(+15.99)EAVES(+79.97)GS(+79.97)ESR	9	12	acetyl-CoA carboxylase OS=Diaphorina citri OX=121845 GN=LOC103507248 PE=4 SV=1	acetyl-CoA carboxylase	LOC103507248	45.18	1469.51	8.8	503	514	M2:Oxidation (M):1000.00;S7:Phosphorylation (STY):11.12;S9:Phosphorylation (STY):14.04	S511	EAVESGSESRNST	587.297	130.886	1707.68	808.62	2191.12	2313.39	2127.62	2210.71	0.365774	0.0410202
A0A3Q0JFS9	A0A3Q0JFS9|A0A3Q0JFS9_DIACI	S	LSTSSVELPPDDS(+79.97)EDEEETPEQK	13	23	Protein phosphatase inhibitor 2 OS=Diaphorina citri OX=121845 GN=LOC103518208 PE=3 SV=1	Protein phosphatase inhibitor 2	LOC103518208	52.97	2640.09	-4.4	118	140	S13:Phosphorylation (STY):23.15	S130	ELPPDDSEDEEET	9048.2	3038.51	5752.25	5946.32	18015.9	17243.3	13544.6	16267.9	0.365525	0.00964765
A0A3Q0JKC3	A0A3Q0JKC3|A0A3Q0JKC3_DIACI	S	TWSELVEEDSS(+79.97)ADESSAVIAGK	11	22	Uncharacterized protein LOC113473273 OS=Diaphorina citri OX=121845 GN=LOC113473273 PE=4 SV=1	Uncharacterized protein LOC113473273	LOC113473273	41.6	2389.02	0.2	181	202	S11:Phosphorylation (STY):8.69	S191	LVEEDSSADESSA	442.635	674.224	478.933	531.93	1062.17	1919.71	1388.49	1456.79	0.365138	0.023657
A0A1S3D3A4	A0A1S3D3A4|A0A1S3D3A4_DIACI	S	KTLS(+79.97)GLQDK	4	9	Uncharacterized protein LOC103510471 OS=Diaphorina citri OX=121845 GN=LOC103510471 PE=4 SV=1	Uncharacterized protein LOC103510471	LOC103510471	43.97	1068.52	-0.5	166	174	S4:Phosphorylation (STY):28.86	S169	DKKKTLSGLQDKA	1888.15	3102.15	3488.56	2826.29	6473.59	6026.8	10721	7740.48	0.365131	0.035294
A0A1S3DJU3	A0A1S3DJU3|A0A1S3DJU3_DIACI	S	SES(+79.97)TPESEPK	3	10	Otolith matrix protein OMM-64-like OS=Diaphorina citri OX=121845 GN=LOC103519765 PE=4 SV=1	Otolith matrix protein OMM-64-like	LOC103519765	24.56	1169.45	17.8	180	189	S3:Phosphorylation (STY):14.63	S182	DEDKSESTPESEP	162.471	241.163	98.0542	167.229	283.898	487.72	603.102	458.24	0.364938	0.0463594
A0A1S4EML9	A0A1S4EML9|A0A1S4EML9_DIACI	S	GLLHKYS(+79.97)NEVLTAQDSAQR	7	19	Uncharacterized protein LOC103518729 OS=Diaphorina citri OX=121845 GN=LOC103518729 PE=4 SV=1	Uncharacterized protein LOC103518729	LOC103518729	60.37	2209.05	-4.6	251	269	S7:Phosphorylation (STY):0.00	S257	GLLHKYSNEVLTA	1582.16	3975.92	3862.41	3140.17	8467.72	9479.26	7879	8608.66	0.364768	0.00384499
A0A3Q0JK09	A0A3Q0JK09|A0A3Q0JK09_DIACI	S	KTAS(+79.97)EPNLLK	4	10	Histone deacetylase 4-like OS=Diaphorina citri OX=121845 GN=LOC103523301 PE=3 SV=1	Histone deacetylase 4-like	LOC103523301	26.62	1179.59	-5.6	70	79	S4:Phosphorylation (STY):8.22	S73	PLRKTASEPNLLK	361.487	635.257	433.71	476.818	1488.35	1540.6	900.371	1309.78	0.364046	0.0196206
A0A3Q0IQZ7	A0A3Q0IQZ7|A0A3Q0IQZ7_DIACI:A0A3Q0IW01|A0A3Q0IW01_DIACI	T	TT(+79.97)PSYVAFTDTER	2	13	Heat shock 70 kDa protein cognate 4-like isoform X1 OS=Diaphorina citri OX=121845 GN=LOC103508277 PE=3 SV=1	Heat shock 70 kDa protein cognate 4-like isoform X1	LOC103508277	53.57	1566.66	3.1	37	49	T2:Phosphorylation (STY):0.00	T38	DQGNRTTPSYVAF	171.423	408.528	82.2801	220.744	745.037	636.082	438.749	606.623	0.36389	0.04342
A0A3Q0JEE3	A0A3Q0JEE3|A0A3Q0JEE3_DIACI	S	SPLS(+79.97)PNLLHPK	4	11	Titin-like OS=Diaphorina citri OX=121845 GN=LOC113471684 PE=4 SV=1	Titin-like	LOC113471684	63.07	1281.65	-1.9	1204	1214	S4:Phosphorylation (STY):22.45	S1207	LDKSPLSPNLLHP	1613.54	103.956	1276.56	998.018	2902.07	2717.16	2614.09	2744.44	0.363651	0.0198737
A0A3Q0IL42	A0A3Q0IL42|A0A3Q0IL42_DIACI	T	GDQKPVTTETT(+79.97)TTTIQTPGIENPVVSTTITK	11	31	Ankyrin-3-like OS=Diaphorina citri OX=121845 GN=LOC103505993 PE=4 SV=1	Ankyrin-3-like	LOC103505993	39.24	3337.65	4.1	1763	1793	T11:Phosphorylation (STY):0.00	T1773	PVTTETTTTTIQT	5045.99	2282.77	236.907	2521.89	7738.01	6771.36	6316.49	6941.96	0.363283	0.0384891
A0A3Q0J389	A0A3Q0J389|A0A3Q0J389_DIACI	S	HFGS(+79.97)PSASDVTIK	4	13	LOW QUALITY PROTEIN: histone demethylase UTY-like OS=Diaphorina citri OX=121845 GN=LOC103514019 PE=4 SV=1	LOW QUALITY PROTEIN: histone demethylase UTY-like	LOC103514019	42.82	1424.63	0.6	541	553	S4:Phosphorylation (STY):22.85	S544	LLKHFGSPSASDV	773.042	173.908	810.353	585.768	1906.44	1556.07	1376.24	1612.92	0.363173	0.0164637
A0A3Q0J961	A0A3Q0J961|A0A3Q0J961_DIACI:A0A3Q0JFX5|A0A3Q0JFX5_DIACI:A0A3Q0J0A0|A0A3Q0J0A0_DIACI	S	IYEQEIS(+79.97)NMTTNIAK	7	15	Myosin-2 heavy chain-like OS=Diaphorina citri OX=121845 GN=LOC113470608 PE=4 SV=1	Myosin-2 heavy chain-like	LOC113470608	43.76	1833.82	1.4	202	216	S7:Phosphorylation (STY):4.52	S208	IYEQEISNMTTNI	607.469	778.267	1081.07	822.268	1398.49	3131.8	2295.22	2275.17	0.361409	0.0489116
A0A1S3DHH7	A0A1S3DHH7|A0A1S3DHH7_DIACI	S	LS(+79.97)YQNWLINESNLDDR	2	16	Vicilin-like seed storage protein At2g18540 OS=Diaphorina citri OX=121845 GN=LOC103517821 PE=4 SV=1	Vicilin-like seed storage protein At2g18540	LOC103517821	45.94	2058.9	13.3	395	410	S2:Phosphorylation (STY):12.28	S396	KLRRKLSYQNWLI	1263.43	553.934	626.353	814.572	2926.05	1875.31	2019.7	2273.69	0.35826	0.0215811
A0A1S3DCZ6	A0A1S3DCZ6|A0A1S3DCZ6_DIACI	S	M(+15.99)EENLSS(+79.97)EEEPTSK	7	14	Probable chromatin modification-related protein eaf7 OS=Diaphorina citri OX=121845 GN=LOC103516192 PE=3 SV=1	Probable chromatin modification-related protein eaf7	LOC103516192	28.43	1704.64	-1.1	159	172	M1:Oxidation (M):1000.00;S7:Phosphorylation (STY):17.01	S165	MEENLSSEEEPTS	83.4927	174.056	81.4648	113.005	209.667	403.451	335.824	316.314	0.357255	0.0344002
A0A3Q0IWH6	A0A3Q0IWH6|A0A3Q0IWH6_DIACI:A0A1S3DKR6|A0A1S3DKR6_DIACI	S	SSDVYEFKDDS(+79.97)DEDEAATRPLLSIK	11	25	LOW QUALITY PROTEIN: protein split ends-like OS=Diaphorina citri OX=121845 GN=LOC113467164 PE=4 SV=1	LOW QUALITY PROTEIN: protein split ends-like	LOC113467164	26.98	2909.29	5.4	3315	3339	S11:Phosphorylation (STY):1.61	S3325	YEFKDDSDEDEAA	360.95	1613.63	1094.37	1022.98	2209.71	2610.19	3776.02	2865.31	0.357024	0.0361542
A0A3Q0J8A9	A0A3Q0J8A9|A0A3Q0J8A9_DIACI	S	LGSLS(+79.97)PSAPPLLAHR	5	15	E3 ubiquitin-protein ligase OS=Diaphorina citri OX=121845 GN=LOC103516539 PE=3 SV=1	E3 ubiquitin-protein ligase	LOC103516539	61.73	1594.82	0.5	217	231	S5:Phosphorylation (STY):0.00	S221	ERLGSLSPSAPPL	296.373	88.0084	336.179	240.187	562.047	559.215	898.095	673.119	0.356827	0.0336484
A0A3Q0ITW8	A0A3Q0ITW8|A0A3Q0ITW8_DIACI	S	LFNEDSNS(+79.97)GIENK	8	13	Uncharacterized protein LOC103507446 OS=Diaphorina citri OX=121845 GN=LOC103507446 PE=4 SV=1	Uncharacterized protein LOC103507446	LOC103507446	61.07	1545.63	0	174	186	S8:Phosphorylation (STY):14.63	S181	FNEDSNSGIENKM	9323.27	9850.5	10532.6	9902.13	21759.8	22571	39043.5	27791.4	0.356301	0.0338296
A0A3Q0IST9	A0A3Q0IST9|A0A3Q0IST9_DIACI	S	RSS(+79.97)SDS(+79.97)PPPLLIHR	3	14	Uncharacterized protein LOC103509128 OS=Diaphorina citri OX=121845 GN=LOC103509128 PE=4 SV=1	Uncharacterized protein LOC103509128	LOC103509128	48.67	1720.77	0.8	911	924	S3:Phosphorylation (STY):0.00;S6:Phosphorylation (STY):39.76	S913	LKSRRSSSDSPPP	3740.65	3974.96	5537.09	4417.57	11844.7	15986.9	9441.82	12424.5	0.355554	0.0158954
A0A3Q0IST9	A0A3Q0IST9|A0A3Q0IST9_DIACI	S	RSS(+79.97)SDS(+79.97)PPPLLIHR	6	14	Uncharacterized protein LOC103509128 OS=Diaphorina citri OX=121845 GN=LOC103509128 PE=4 SV=1	Uncharacterized protein LOC103509128	LOC103509128	48.67	1720.77	0.8	911	924	S3:Phosphorylation (STY):0.00;S6:Phosphorylation (STY):39.76	S916	RRSSSDSPPPLLI	3740.65	3974.96	5537.09	4417.57	11844.7	15986.9	9441.82	12424.5	0.355554	0.0158954
A0A3Q0JE17	A0A3Q0JE17|A0A3Q0JE17_DIACI	S	SS(+79.97)LHC(+57.02)VGVEATAVR	2	14	Mediator of RNA polymerase II transcription subunit 24 OS=Diaphorina citri OX=121845 GN=LOC103517291 PE=4 SV=1	Mediator of RNA polymerase II transcription subunit 24	LOC103517291	48.3	1564.71	1.6	78	91	S2:Phosphorylation (STY):0.00;C5:Carbamidomethylation:1000.00	S79	SGERKSSLHCVGV	959.941	3272.25	2140.44	2124.21	4662.88	5303.71	7959.88	5975.49	0.355487	0.0334502
A0A1S3CXZ9	A0A1S3CXZ9|A0A1S3CXZ9_DIACI	S	AQS(+79.97)DENLNVFNNPVWLAAQK	3	20	GATA zinc finger domain-containing protein 14-like OS=Diaphorina citri OX=121845 GN=LOC103507461 PE=4 SV=2	GATA zinc finger domain-containing protein 14-like	LOC103507461	53.8	2337.08	0.9	459	478		S461	FNLKAQSDENLNV	118.555	967.745	757.245	614.515	1269.75	2216.08	1710.84	1732.22	0.354755	0.0404192
A0A1S3DVF9	A0A1S3DVF9|A0A1S3DVF9_DIACI	S	S(+79.97)NESLSNFVQFC(+57.02)QK	1	14	Protein OPI10 homolog OS=Diaphorina citri OX=121845 GN=LOC103524975 PE=3 SV=1	Protein OPI10 homolog	LOC103524975	50.85	1766.73	3.7	136	149	S1:Phosphorylation (STY):14.84;C12:Carbamidomethylation:1000.00	S136	QHLASKSNESLSN	216.425	636.353	198.466	350.415	799.829	1284.71	879.377	987.971	0.354681	0.0371369
A0A1S3D3A4	A0A1S3D3A4|A0A1S3D3A4_DIACI	S	TKPGETSAS(+79.97)ATLNTLK	9	16	Uncharacterized protein LOC103510471 OS=Diaphorina citri OX=121845 GN=LOC103510471 PE=4 SV=1	Uncharacterized protein LOC103510471	LOC103510471	52.8	1697.82	0.5	132	147	S9:Phosphorylation (STY):17.01	S140	PGETSASATLNTL	6449.02	6880.46	8045.8	7125.09	16562.5	20182.1	23589.6	20111.4	0.354281	0.00337912
A0A3Q0ILE3	A0A3Q0ILE3|A0A3Q0ILE3_DIACI	S	S(+79.97)DSIHSYSGLLGDDR	1	15	GAS2-like protein pickled eggs OS=Diaphorina citri OX=121845 GN=LOC103506179 PE=4 SV=1	GAS2-like protein pickled eggs	LOC103506179	63.77	1700.7	2.5	486	500	S1:Phosphorylation (STY):0.00	S486	ERKFSRSDSIHSY	270.334	2893.55	2421.6	1861.83	4817	6729.04	4258.29	5268.11	0.353415	0.0364017
A0A3Q0IUB4	A0A3Q0IUB4|A0A3Q0IUB4_DIACI:A0A1S3D3X8|A0A1S3D3X8_DIACI	S	TTTS(+79.97)TTTSAIILNTGYLK	4	18	Uncharacterized protein LOC113466771 OS=Diaphorina citri OX=121845 GN=LOC113466771 PE=4 SV=1	Uncharacterized protein LOC113466771	LOC113466771	67.47	1964.97	-11.8	10	27	S4:Phosphorylation (STY):0.00	S13	VTRTTTSTTTSAI	1564.49	2276.16	3622.44	2487.7	5255.98	5947.86	9934.44	7046.1	0.35306	0.0446087
A0A1S4E7H7	A0A1S4E7H7|A0A1S4E7H7_DIACI	S	RLS(+79.97)HPLITK	3	9	Uncharacterized protein LOC103505995 OS=Diaphorina citri OX=121845 GN=LOC103505995 PE=4 SV=2	Uncharacterized protein LOC103505995	LOC103505995	43.44	1143.62	-11.1	509	517	S3:Phosphorylation (STY):61.30	S511	EMPRRLSHPLITK	2502.87	1992.3	1982.81	2159.33	5179.79	7259.96	5910.24	6116.66	0.353024	0.00333901
A0A3Q0IN52	A0A3Q0IN52|A0A3Q0IN52_DIACI	S	YIEQVEALEAYQQQS(+79.97)QAR	15	18	LOW QUALITY PROTEIN: titin OS=Diaphorina citri OX=121845 GN=LOC103524768 PE=4 SV=1	LOW QUALITY PROTEIN: titin	LOC103524768	70.38	2233.01	2.5	873	890	S15:Phosphorylation (STY):49.79	S887	EAYQQQSQARTPV	320.108	6057.76	5032.99	3803.62	8535.52	11507.5	12349.3	10797.4	0.352271	0.0296015
A0A3Q0IL42	A0A3Q0IL42|A0A3Q0IL42_DIACI	S	VSAENSQDKPYVIS(+79.97)PEVNK	14	19	Ankyrin-3-like OS=Diaphorina citri OX=121845 GN=LOC103505993 PE=4 SV=1	Ankyrin-3-like	LOC103505993	50.97	2183.01	-6.8	2497	2515	S14:Phosphorylation (STY):22.45	S2510	DKPYVISPEVNKE	1360.18	3736.62	6324.15	3806.98	8116.77	13004.3	11300.9	10807.3	0.35226	0.0259454
A0A3Q0IYR2	A0A3Q0IYR2|A0A3Q0IYR2_DIACI	S	TKS(+79.97)DPYVNTVAR	3	12	LOW QUALITY PROTEIN: uncharacterized protein LOC113468551 OS=Diaphorina citri OX=121845 GN=LOC113468551 PE=4 SV=1	LOW QUALITY PROTEIN: uncharacterized protein LOC113468551	LOC113468551	41.24	1429.66	2.4	212	223	S3:Phosphorylation (STY):14.04	S214	SVERTKSDPYVNT	117.683	141.056	76.7641	111.834	232.415	302.994	421.925	319.112	0.350455	0.0238169
A0A1S3CVD1	A0A1S3CVD1|A0A1S3CVD1_DIACI	T	VIADKT(+79.97)PELEK	6	11	Titin-like OS=Diaphorina citri OX=121845 GN=LOC103505994 PE=4 SV=1	Titin-like	LOC103505994	53.08	1321.65	-5.9	449	459		T454	KVIADKTPELEKL	7245.56	1689.95	4992.36	4642.62	11368.1	15043.5	13340	13250.5	0.350372	0.0111882
A0A3Q0JG04	A0A3Q0JG04|A0A3Q0JG04_DIACI	S	AHS(+79.97)SPASLQQTYASAQQQHQQHLK	3	24	Uncharacterized protein LOC103518349 OS=Diaphorina citri OX=121845 GN=LOC103518349 PE=4 SV=1	Uncharacterized protein LOC103518349	LOC103518349	74.38	2753.27	-2.8	248	271	S3:Phosphorylation (STY):14.02	S250	AHPRAHSSPASLQ	4085.35	41080.9	32480.2	25882.2	64837.2	70816.8	86239.4	73964.5	0.349927	0.0201814
A0A3Q0IZ20	A0A3Q0IZ20|A0A3Q0IZ20_DIACI	T	T(+79.97)PDEVADLPVHEEVDATDYEDIEKK	1	25	Microtubule-associated protein futsch-like OS=Diaphorina citri OX=121845 GN=LOC113467621 PE=4 SV=1	Microtubule-associated protein futsch-like	LOC113467621	39.69	2936.29	0.6	170	194	T1:Phosphorylation (STY):47.94	T170	QTGIVKTPDEVAD	202.57	1681.76	3798.84	1894.39	6603.41	4904.55	4792.62	5433.53	0.348649	0.041669
A0A1S4EKC4	A0A1S4EKC4|A0A1S4EKC4_DIACI	S	VISNAS(+79.97)C(+57.02)TTNC(+57.02)LAPLAK	6	17	Glyceraldehyde-3-phosphate dehydrogenase OS=Diaphorina citri OX=121845 GN=LOC103516640 PE=3 SV=1	Glyceraldehyde-3-phosphate dehydrogenase	LOC103516640	58.73	1898.86	13.4	143	159	S6:Phosphorylation (STY):15.73;C7:Carbamidomethylation:1000.00;C11:Carbamidomethylation:1000.00	S148	KVISNASCTTNCL	2388.19	2093.15	3439.09	2640.14	4490.01	8283.54	9984.93	7586.16	0.348021	0.0418283
A0A3Q0ILE3	A0A3Q0ILE3|A0A3Q0ILE3_DIACI	S	SDS(+79.97)IHSYSGLLGDDR	3	15	GAS2-like protein pickled eggs OS=Diaphorina citri OX=121845 GN=LOC103506179 PE=4 SV=1	GAS2-like protein pickled eggs	LOC103506179	59.46	1700.7	1.1	486	500	S3:Phosphorylation (STY):9.40	S488	KFSRSDSIHSYSG	172.603	2893.55	2421.6	1829.25	4817	6729.04	4258.29	5268.11	0.347231	0.0377175
A0A1S4EKY9	A0A1S4EKY9|A0A1S4EKY9_DIACI:A0A1S3DLM1|A0A1S3DLM1_DIACI	S	LFWQKS(+79.97)EEK	6	9	Uncharacterized protein DDB_G0283357-like OS=Diaphorina citri OX=121845 GN=LOC103517151 PE=4 SV=1	Uncharacterized protein DDB_G0283357-like	LOC103517151	44.46	1273.57	-4.5	607	615		S612	KLFWQKSEEKMNQ	285.765	1214.83	338.589	613.062	1519.2	2174	1607.79	1767	0.346952	0.0339835
A0A1S4EML9	A0A1S4EML9|A0A1S4EML9_DIACI	S	YS(+79.97)NEVLTAQDSAQR	2	14	Uncharacterized protein LOC103518729 OS=Diaphorina citri OX=121845 GN=LOC103518729 PE=4 SV=1	Uncharacterized protein LOC103518729	LOC103518729	58.85	1660.71	2.2	256	269	S2:Phosphorylation (STY):0.00	S257	GLLHKYSNEVLTA	1478.74	1469.56	1364.01	1437.44	4977.98	4322.88	3131.24	4144.03	0.346869	0.00751444
A0A3Q0JD32	A0A3Q0JD32|A0A3Q0JD32_DIACI	S	SDGS(+79.97)LASSSGTQAASSPLSK	4	20	Patj homolog OS=Diaphorina citri OX=121845 GN=LOC113470420 PE=4 SV=1	Patj homolog	LOC113470420	58.74	1916.84	-1.5	555	574	S4:Phosphorylation (STY):0.00	S558	KAKSDGSLASSSG	324.7	361.917	414.877	367.165	728.479	976.982	1481.27	1062.24	0.34565	0.0356292
A0A1S3DUC8	A0A1S3DUC8|A0A1S3DUC8_DIACI	T	RREST(+79.97)DQGSEVTITEVQDK	5	19	Four and a half LIM domains protein 2 isoform X1 OS=Diaphorina citri OX=121845 GN=LOC103523348 PE=4 SV=1	Four and a half LIM domains protein 2 isoform X1	LOC103523348	59.87	2257.02	0.6	26	44	T5:Phosphorylation (STY):0.00	T30	GKRRESTDQGSEV	70005.8	60215.9	51995.6	60739.1	146925	130272	254839	177345	0.34249	0.0415405
A0A3Q0IQQ4	A0A3Q0IQQ4|A0A3Q0IQQ4_DIACI	S	NS(+79.97)APAITITAANAQK	2	15	Uncharacterized protein LOC103508071 OS=Diaphorina citri OX=121845 GN=LOC103508071 PE=4 SV=1	Uncharacterized protein LOC103508071	LOC103508071	61.31	1549.75	-1.7	10	24	S2:Phosphorylation (STY):56.99	S11	IFAHRNSAPAITI	198.708	184.16	163.805	182.224	432.933	770.63	394.523	532.695	0.34208	0.0431243
A0A3Q0JDT7	A0A3Q0JDT7|A0A3Q0JDT7_DIACI	S	SSS(+79.97)SSPPSPLSK	3	12	Myosin-IIIb-like OS=Diaphorina citri OX=121845 GN=LOC103519252 PE=3 SV=1	Myosin-IIIb-like	LOC103519252	41.16	1239.54	-1	118	129	S3:Phosphorylation (STY):0.00	S120	HDTKSSSSSPPSP	830.328	1081.17	346.373	752.624	2824.1	1333.76	2471.34	2209.73	0.340595	0.0431663
A0A3Q0IPJ2	A0A3Q0IPJ2|A0A3Q0IPJ2_DIACI	S	IGDDEAEVLS(+79.97)R	10	11	LOW QUALITY PROTEIN: obscurin-like OS=Diaphorina citri OX=121845 GN=LOC103507575 PE=3 SV=1	LOW QUALITY PROTEIN: obscurin-like	LOC103507575	70.64	1282.54	3.7	2027	2037		S2036	DEAEVLSRKTSRQ	2136.52	3071.16	8173.07	4460.25	14640.2	11148	13562.1	13116.7	0.340042	0.0155688
A0A1S3DE84	A0A1S3DE84|A0A1S3DE84_DIACI:A0A1S3DEM1|A0A1S3DEM1_DIACI	T	SSIHPNT(+79.97)PLFNR	7	12	Uncharacterized protein LOC103516882 isoform X2 OS=Diaphorina citri OX=121845 GN=LOC103516882 PE=4 SV=1	Uncharacterized protein LOC103516882 isoform X2	LOC103516882	47.42	1461.68	4.5	138	149	T7:Phosphorylation (STY):28.13	T144	SSIHPNTPLFNRT	4011.49	5568.26	5761.61	5113.79	10681.1	13009.7	21505.7	15065.5	0.339437	0.0406078
A0A1S3D7F8	A0A1S3D7F8|A0A1S3D7F8_DIACI	S	AS(+79.97)EGHLNLQMGYNK	2	14	Calponin OS=Diaphorina citri OX=121845 GN=LOC103513027 PE=3 SV=1	Calponin	LOC103513027	60.82	1640.7	6.2	140	153	S2:Phosphorylation (STY):52.32	S141	EEQLRASEGHLNL	3243.07	1872.34	2122.74	2412.72	5578.61	8813.84	6995.57	7129.34	0.338421	0.0100797
A0A1S3DLK3	A0A1S3DLK3|A0A1S3DLK3_DIACI	S	ADLTGGS(+79.97)GQEYDFK	7	14	Uncharacterized protein LOC103521004 OS=Diaphorina citri OX=121845 GN=LOC103521004 PE=4 SV=1	Uncharacterized protein LOC103521004	LOC103521004	63.86	1566.62	-1.4	68	81	S7:Phosphorylation (STY):35.82	S74	ADLTGGSGQEYDF	737.117	302.166	1274.67	771.319	2903.56	1471.84	2464.91	2280.1	0.338283	0.0412363
A0A3Q0IM19	A0A3Q0IM19|A0A3Q0IM19_DIACI	T	LAEEIPT(+79.97)SVEAK	7	12	Uncharacterized protein LOC103506519 OS=Diaphorina citri OX=121845 GN=LOC103506519 PE=4 SV=1	Uncharacterized protein LOC103506519	LOC103506519	48.39	1365.64	-0.9	1355	1366	T7:Phosphorylation (STY):0.00	T1361	LAEEIPTSVEAKS	2759.26	2138.21	3058.38	2651.95	10310	8631.75	4592.88	7844.87	0.338049	0.0390707
A0A3Q0IM19	A0A3Q0IM19|A0A3Q0IM19_DIACI	S	LAEEIPTS(+79.97)VEAK	8	12	Uncharacterized protein LOC103506519 OS=Diaphorina citri OX=121845 GN=LOC103506519 PE=4 SV=1	Uncharacterized protein LOC103506519	LOC103506519	54.83	1365.64	0.3	1355	1366	S8:Phosphorylation (STY):0.00	S1362	AEEIPTSVEAKSP	2759.26	2138.21	3058.38	2651.95	10310	8631.75	4592.88	7844.87	0.338049	0.0390707
A0A3Q0J5H9	A0A3Q0J5H9|A0A3Q0J5H9_DIACI:A0A3Q0J5P4|A0A3Q0J5P4_DIACI	S	S(+79.97)PVSPTYQAPSSLPPYS(+79.97)PSSPALSGAKPYGTQNTIK	1	36	PDZ and LIM domain protein Zasp-like isoform X2 OS=Diaphorina citri OX=121845 GN=LOC103515160 PE=4 SV=1	PDZ and LIM domain protein Zasp-like isoform X2	LOC103515160	33.47	3834.78	2.8	95	130	S1:Phosphorylation (STY):0.00;S17:Phosphorylation (STY):0.00	S95	HTTAPKSPVSPTY	638.513	6964.12	6471.35	4691.33	10970.1	18197.3	12475.4	13880.9	0.337969	0.037374
A0A3Q0J5H9	A0A3Q0J5H9|A0A3Q0J5H9_DIACI:A0A3Q0J5P4|A0A3Q0J5P4_DIACI	S	S(+79.97)PVSPTYQAPSSLPPYS(+79.97)PSSPALSGAKPYGTQNTIK	17	36	PDZ and LIM domain protein Zasp-like isoform X2 OS=Diaphorina citri OX=121845 GN=LOC103515160 PE=4 SV=1	PDZ and LIM domain protein Zasp-like isoform X2	LOC103515160	33.47	3834.78	2.8	95	130	S1:Phosphorylation (STY):0.00;S17:Phosphorylation (STY):0.00	S111	SSLPPYSPSSPAL	638.513	6964.12	6471.35	4691.33	10970.1	18197.3	12475.4	13880.9	0.337969	0.037374
A0A3Q0JBI3	A0A3Q0JBI3|A0A3Q0JBI3_DIACI	S	ENSEEGS(+79.97)SEHLLPPDAPR	7	18	non-specific serine/threonine protein kinase OS=Diaphorina citri OX=121845 GN=LOC103522428 PE=3 SV=1	non-specific serine/threonine protein kinase	LOC103522428	47.63	2042.86	2.3	412	429	S7:Phosphorylation (STY):0.00	S418	ENSEEGSSEHLLP	34741.6	16168.3	15189.8	22033.2	56215.7	77996.1	61586.6	65266.1	0.337591	0.00907184
A0A1S4E829	A0A1S4E829|A0A1S4E829_DIACI:A0A1S3CVS3|A0A1S3CVS3_DIACI:A0A3Q0IL98|A0A3Q0IL98_DIACI	S	DDYRYS(+79.97)GS(+79.97)ENEEEETGVGGEPSSIIQAPGDNTLR	6	34	Serine/threonine-protein kinase mig-15 isoform X1 OS=Diaphorina citri OX=121845 GN=LOC103506122 PE=4 SV=1	Serine/threonine-protein kinase mig-15 isoform X1	LOC103506122	71.36	3830.55	-1.8	322	355	S6:Phosphorylation (STY):1.37;S8:Phosphorylation (STY):0.00	S327	RDDYRYSGSENEE	7327.68	14572.6	479.926	7460.06	23249.8	18220.5	24913	22127.7	0.337136	0.031929
A0A1S4E829	A0A1S4E829|A0A1S4E829_DIACI:A0A1S3CVS3|A0A1S3CVS3_DIACI:A0A3Q0IL98|A0A3Q0IL98_DIACI	S	DDYRYS(+79.97)GS(+79.97)ENEEEETGVGGEPSSIIQAPGDNTLR	8	34	Serine/threonine-protein kinase mig-15 isoform X1 OS=Diaphorina citri OX=121845 GN=LOC103506122 PE=4 SV=1	Serine/threonine-protein kinase mig-15 isoform X1	LOC103506122	71.36	3830.55	-1.8	322	355	S6:Phosphorylation (STY):1.37;S8:Phosphorylation (STY):0.00	S329	DYRYSGSENEEEE	7327.68	14572.6	479.926	7460.06	23249.8	18220.5	24913	22127.7	0.337136	0.031929
A0A3Q0ITU7	A0A3Q0ITU7|A0A3Q0ITU7_DIACI	T	DDLKDDADVVKEST(+79.97)PK	14	16	Gelsolin-related protein of 125 kDa-like OS=Diaphorina citri OX=121845 GN=LOC103509595 PE=4 SV=1	Gelsolin-related protein of 125 kDa-like	LOC103509595	42.88	1853.83	0.7	257	272	T14:Phosphorylation (STY):0.00	T270	DVVKESTPKKKDK	1005.7	3202.05	7797.53	4001.76	8362.27	14711.7	12673.5	11915.8	0.335836	0.0446328
A0A1S4EE10	A0A1S4EE10|A0A1S4EE10_DIACI	S	NPS(+79.97)NISMKPLQGR	3	13	Radial spoke head protein 3 homolog OS=Diaphorina citri OX=121845 GN=LOC103511440 PE=3 SV=1	Radial spoke head protein 3 homolog	LOC103511440	47.42	1520.72	-1.3	96	108	S3:Phosphorylation (STY):32.97	S98	RALKNPSNISMKP	551.645	374.605	171.932	366.06	801.746	1258.18	1220.08	1093.34	0.33481	0.0164169
A0A1S3D082	A0A1S3D082|A0A1S3D082_DIACI	S	S(+79.97)NC(+57.02)SQPAAEQTIER	1	14	Uncharacterized protein LOC103508678 OS=Diaphorina citri OX=121845 GN=LOC103508678 PE=4 SV=1	Uncharacterized protein LOC103508678	LOC103508678	54.65	1669.68	1	420	433	S1:Phosphorylation (STY):19.05;C3:Carbamidomethylation:1000.00	S420	LNLGNRSNCSQPA	1566.75	2666.2	3786.29	2673.08	6203.28	8955.8	8858.42	8005.83	0.333892	0.00851758
A0A1S3DAV5	A0A1S3DAV5|A0A1S3DAV5_DIACI	S	GAVLSETNSSVVSTNIS(+79.97)EDEEVR	17	23	Late endosomal/lysosomal adaptor and MAPK and MTOR activator 4 OS=Diaphorina citri OX=121845 GN=LOC103514986 PE=3 SV=1	Late endosomal/lysosomal adaptor and MAPK and MTOR activator 4	LOC103514986	38.81	2501.12	2.7	88	110	S17:Phosphorylation (STY):16.51	S104	VVSTNISEDEEVR	331.886	860.06	1485.14	892.362	2505.54	3298.08	2244.78	2682.8	0.332623	0.0176297
A0A3Q0JH52	A0A3Q0JH52|A0A3Q0JH52_DIACI	S	KVDIFADSPS(+79.97)PQSK	10	14	DNA ligase 1 OS=Diaphorina citri OX=121845 GN=LOC103518973 PE=4 SV=1	DNA ligase 1	LOC103518973	39.47	1597.74	1.1	234	247	S10:Phosphorylation (STY):11.10	S243	IFADSPSPQSKDR	971.41	792.967	419.942	728.106	1628.18	2521.76	2419.67	2189.87	0.332488	0.0109319
A0A3Q0JDP5	A0A3Q0JDP5|A0A3Q0JDP5_DIACI:A0A3Q0JHH3|A0A3Q0JHH3_DIACI:A0A3Q0JDN1|A0A3Q0JDN1_DIACI	S	DSDVYKVS(+79.97)S(+79.97)LEFR	8	13	Uncharacterized protein LOC103519148 isoform X3 OS=Diaphorina citri OX=121845 GN=LOC103519148 PE=4 SV=1	Uncharacterized protein LOC103519148 isoform X3	LOC103519148	41.6	1703.68	2.3	210	222	S8:Phosphorylation (STY):9.42;S9:Phosphorylation (STY):8.26	S217	SDVYKVSSLEFRL	222.397	836.166	2266.76	1108.44	3473.8	4035.66	2496.49	3335.32	0.332335	0.0418829
A0A3Q0JDP5	A0A3Q0JDP5|A0A3Q0JDP5_DIACI:A0A3Q0JHH3|A0A3Q0JHH3_DIACI:A0A3Q0JDN1|A0A3Q0JDN1_DIACI	S	DSDVYKVS(+79.97)S(+79.97)LEFR	9	13	Uncharacterized protein LOC103519148 isoform X3 OS=Diaphorina citri OX=121845 GN=LOC103519148 PE=4 SV=1	Uncharacterized protein LOC103519148 isoform X3	LOC103519148	41.6	1703.68	2.3	210	222	S8:Phosphorylation (STY):9.42;S9:Phosphorylation (STY):8.26	S218	DVYKVSSLEFRLF	222.397	836.166	2266.76	1108.44	3473.8	4035.66	2496.49	3335.32	0.332335	0.0418829
A0A1S4E723	A0A1S4E723|A0A1S4E723_DIACI	S	S(+79.97)PNNYLDSQGLR	1	12	Hornerin-like OS=Diaphorina citri OX=121845 GN=LOC103505636 PE=4 SV=1	Hornerin-like	LOC103505636	64.6	1442.62	-5.2	18	29	S1:Phosphorylation (STY):49.79	S18	RSLSHRSPNNYLD	720.914	2707.44	2270.44	1899.6	4974.02	4365.63	7851.51	5730.39	0.331495	0.0359296
A0A1S3D082	A0A1S3D082|A0A1S3D082_DIACI	S	SNC(+57.02)S(+79.97)QPAAEQTIER	4	14	Uncharacterized protein LOC103508678 OS=Diaphorina citri OX=121845 GN=LOC103508678 PE=4 SV=1	Uncharacterized protein LOC103508678	LOC103508678	63.77	1669.68	2.7	420	433	C3:Carbamidomethylation:1000.00;S4:Phosphorylation (STY):14.84	S423	GNRSNCSQPAAEQ	1994.17	3257.38	3334.63	2862.06	6203.28	7697.94	12059.3	8653.52	0.330739	0.0328915
A0A1S3DFE7	A0A1S3DFE7|A0A1S3DFE7_DIACI	S	LVGTS(+79.97)PPPPPPPSR	5	14	TBC1 domain family member 5 homolog B-like OS=Diaphorina citri OX=121845 GN=LOC103517393 PE=4 SV=1	TBC1 domain family member 5 homolog B-like	LOC103517393	57.67	1477.73	-2.5	115	128	S5:Phosphorylation (STY):7.65	S119	AKLVGTSPPPPPP	648.705	1059.13	454.213	720.684	2727.52	2190.31	1619.35	2179.06	0.330731	0.0163786
A0A3Q0ITT6	A0A3Q0ITT6|A0A3Q0ITT6_DIACI	S	S(+79.97)PVGSSIPS(+79.97)PTKGDSK	1	16	Uncharacterized protein LOC103509596 OS=Diaphorina citri OX=121845 GN=LOC103509596 PE=4 SV=1	Uncharacterized protein LOC103509596	LOC103509596	64.38	1702.72	2.8	420	435	S1:Phosphorylation (STY):67.69;S9:Phosphorylation (STY):7.32	S420	ESAVSKSPVGSSI	12177.3	4766.13	10098.5	9013.99	30713.5	28237.8	23604.3	27518.5	0.327561	0.00366123
A0A3Q0ITT6	A0A3Q0ITT6|A0A3Q0ITT6_DIACI	S	S(+79.97)PVGSSIPS(+79.97)PTKGDSK	9	16	Uncharacterized protein LOC103509596 OS=Diaphorina citri OX=121845 GN=LOC103509596 PE=4 SV=1	Uncharacterized protein LOC103509596	LOC103509596	64.38	1702.72	2.8	420	435	S1:Phosphorylation (STY):67.69;S9:Phosphorylation (STY):7.32	S428	VGSSIPSPTKGDS	12177.3	4766.13	10098.5	9013.99	30713.5	28237.8	23604.3	27518.5	0.327561	0.00366123
A0A1S3CWD2	A0A1S3CWD2|A0A1S3CWD2_DIACI	S	M(+42.01)DKS(+79.97)FTSLTYK	4	11	Uncharacterized protein LOC103506481 OS=Diaphorina citri OX=121845 GN=LOC103506481 PE=4 SV=1	Uncharacterized protein LOC103506481	LOC103506481	40.75	1441.62	3.1	1	11	M1:Acetylation (Protein N-term):1000.00;S4:Phosphorylation (STY):9.40	S4	___MDKSFTSLTY		115.29	97.843	106.566	325.044	334.814	317.963	325.94	0.326951	0.000154295
A0A1S3D1U7	A0A1S3D1U7|A0A1S3D1U7_DIACI	S	AIS(+79.97)KDLLHK	3	9	Uncharacterized protein LOC103508810 OS=Diaphorina citri OX=121845 GN=LOC103508810 PE=4 SV=2	Uncharacterized protein LOC103508810	LOC103508810	53.19	1103.57	-2.6	1346	1354		S1348	ILMKAISKDLLHK	529.179	212.944	348.854	363.659	809.029	1015.85	1521.1	1115.33	0.326056	0.0310379
A0A3Q0ITW8	A0A3Q0ITW8|A0A3Q0ITW8_DIACI	T	TETDIPISTLILT(+79.97)PSK	13	16	Uncharacterized protein LOC103507446 OS=Diaphorina citri OX=121845 GN=LOC103507446 PE=4 SV=1	Uncharacterized protein LOC103507446	LOC103507446	60.54	1807.92	-0.2	88	103	T13:Phosphorylation (STY):5.47	T100	ISTLILTPSKSYA	703.829	1624.47	1109.05	1145.78	4180.47	2979.39	3403.67	3521.17	0.325397	0.00575237
A0A3Q0II80	A0A3Q0II80|A0A3Q0II80_DIACI	S	SDSHAEEALIPSESGEGEEGVEEETPAS(+79.97)PPFVK	28	33	Uncharacterized protein LOC103524827 OS=Diaphorina citri OX=121845 GN=LOC103524827 PE=4 SV=1	Uncharacterized protein LOC103524827	LOC103524827	51.27	3519.51	4.9	688	720	S28:Phosphorylation (STY):32.97	S715	EEETPASPPFVKA	1722.77	605.864	2734.82	1687.82	6260.73	5144.2	4166.39	5190.44	0.325178	0.0153415
A0A3Q0J6K3	A0A3Q0J6K3|A0A3Q0J6K3_DIACI	T	IAT(+79.97)SPGHDLPSPYLSR	3	16	Uncharacterized protein LOC103515666 OS=Diaphorina citri OX=121845 GN=LOC103515666 PE=4 SV=1	Uncharacterized protein LOC103515666	LOC103515666	40.81	1789.84	1.8	504	519	T3:Phosphorylation (STY):0.00	T506	SPFKIATSPGHDL	2401.9	3312.35	2691.07	2801.78	9446.57	10000.5	6425.77	8624.29	0.32487	0.00700803
A0A3Q0J6K3	A0A3Q0J6K3|A0A3Q0J6K3_DIACI	S	IATS(+79.97)PGHDLPSPYLSR	4	16	Uncharacterized protein LOC103515666 OS=Diaphorina citri OX=121845 GN=LOC103515666 PE=4 SV=1	Uncharacterized protein LOC103515666	LOC103515666	45.75	1789.84	3.1	504	519	S4:Phosphorylation (STY):0.00	S507	PFKIATSPGHDLP	2401.9	3312.35	2691.07	2801.78	9446.57	10000.5	6425.77	8624.29	0.32487	0.00700803
A0A3Q0IIL1	A0A3Q0IIL1|A0A3Q0IIL1_DIACI	S	S(+79.97)ISSNIYEIEKPLVK	1	15	Uncharacterized protein LOC103524929 OS=Diaphorina citri OX=121845 GN=LOC103524929 PE=4 SV=1	Uncharacterized protein LOC103524929	LOC103524929	53.17	1798.91	3.6	611	625	S1:Phosphorylation (STY):0.00	S611	NEMKRKSISSNIY	1063.8	1547.21	926.918	1179.31	3591.96	4967.88	2458.11	3672.65	0.321105	0.029211
A0A3Q0J796	A0A3Q0J796|A0A3Q0J796_DIACI	S	SQNKSNENLS(+79.97)TLR	10	13	Uncharacterized protein LOC113470240 OS=Diaphorina citri OX=121845 GN=LOC113470240 PE=4 SV=1	Uncharacterized protein LOC113470240	LOC113470240	32.72	1569.71	2.5	1302	1314	S10:Phosphorylation (STY):0.00	S1311	KSNENLSTLRTSP	191.028	1019.81	357.264	522.702	1331.86	2084.31	1468	1628.05	0.321059	0.0322096
A0A1S3DUU2	A0A1S3DUU2|A0A1S3DUU2_DIACI	S	NSLDPDVS(+79.97)PDEQEEK	8	15	Short coiled-coil protein B OS=Diaphorina citri OX=121845 GN=LOC103524660 PE=3 SV=1	Short coiled-coil protein B	LOC103524660	43.02	1780.7	-0.8	62	76	S8:Phosphorylation (STY):61.82	S69	SLDPDVSPDEQEE	594.485	178.751	398.558	390.598	1123.33	1387.3	1148.29	1219.64	0.320257	0.00482069
A0A1S3DMW1	A0A1S3DMW1|A0A1S3DMW1_DIACI:A0A3Q0IW49|A0A3Q0IW49_DIACI	S	S(+79.97)SPAGYDTNVPTETLYK	1	17	Uncharacterized protein LOC103520848 OS=Diaphorina citri OX=121845 GN=LOC103520848 PE=4 SV=1	Uncharacterized protein LOC103520848	LOC103520848	68.22	1921.83	2	225	241	S1:Phosphorylation (STY):0.00	S225	SNRKTKSSPAGYD	2279.91	1839.59	2501.08	2206.86	6434.88	7071.19	7219.86	6908.64	0.319434	0.000109387
A0A3Q0J0B8	A0A3Q0J0B8|A0A3Q0J0B8_DIACI	T	TTTQMSTLSSNYSSSTNNAT(+79.97)SPSK	20	24	Twitchin-like OS=Diaphorina citri OX=121845 GN=LOC103512724 PE=3 SV=1	Twitchin-like	LOC103512724	58.08	2574.08	5.1	1264	1287	T20:Phosphorylation (STY):0.00	T1283	SSTNNATSPSKKI	501.545	1986.67	1729.51	1405.91	2910.51	4449.2	5904.56	4421.42	0.317976	0.0368529
A0A1S3DLS5	A0A1S3DLS5|A0A1S3DLS5_DIACI	S	RYSASFS(+79.97)PIFNPT(+79.97)SPK	7	16	Protein FAM122A OS=Diaphorina citri OX=121845 GN=LOC103521125 PE=3 SV=1	Protein FAM122A	LOC103521125	24.78	1957.84	-0.4	55	70	S7:Phosphorylation (STY):0.00;T13:Phosphorylation (STY):12.28	S61	RYSASFSPIFNPT	177.127	125.347	161.543	154.673	331.809	564.733	563.403	486.648	0.317832	0.0136277
A0A1S3DLS5	A0A1S3DLS5|A0A1S3DLS5_DIACI	T	RYSASFS(+79.97)PIFNPT(+79.97)SPK	13	16	Protein FAM122A OS=Diaphorina citri OX=121845 GN=LOC103521125 PE=3 SV=1	Protein FAM122A	LOC103521125	24.78	1957.84	-0.4	55	70	S7:Phosphorylation (STY):0.00;T13:Phosphorylation (STY):12.28	T67	SPIFNPTSPKLLR	177.127	125.347	161.543	154.673	331.809	564.733	563.403	486.648	0.317832	0.0136277
A0A3Q0IL42	A0A3Q0IL42|A0A3Q0IL42_DIACI	T	GDQKPVT(+79.97)TETTTTTIQTPGIENPVVSTTITK	7	31	Ankyrin-3-like OS=Diaphorina citri OX=121845 GN=LOC103505993 PE=4 SV=1	Ankyrin-3-like	LOC103505993	55.37	3337.65	2.4	1763	1793	T7:Phosphorylation (STY):0.00	T1769	GDQKPVTTETTTT	2552.1	948.947	2472.48	1991.18	5931.82	6771.36	6316.49	6339.89	0.314071	0.00164141
A0A3Q0JGX5	A0A3Q0JGX5|A0A3Q0JGX5_DIACI	S	QNS(+79.97)KENENILK	3	11	Golgin subfamily A member 6-like protein 4 OS=Diaphorina citri OX=121845 GN=LOC113472232 PE=4 SV=1	Golgin subfamily A member 6-like protein 4	LOC113472232	26.2	1395.64	0.1	383	393		S385	KNERQNSKENENI	478.009	809.873	536.396	608.092	1516.6	1973.8	2327.45	1939.28	0.313566	0.00651895
A0A3Q0IVQ8	A0A3Q0IVQ8|A0A3Q0IVQ8_DIACI	S	METYALENLS(+79.97)PS(+79.97)PEDEK	10	17	LOW QUALITY PROTEIN: titin-like OS=Diaphorina citri OX=121845 GN=LOC103510529 PE=3 SV=1	LOW QUALITY PROTEIN: titin-like	LOC103510529	77.7	2111.8	4.4	1136	1152	S10:Phosphorylation (STY):118.11;S12:Phosphorylation (STY):130.84	S1145	YALENLSPSPEDE	285.777	8325.97	10759.4	6457.05	19443.2	24930.7	17417.9	20597.3	0.31349	0.0218721
A0A3Q0IVQ8	A0A3Q0IVQ8|A0A3Q0IVQ8_DIACI	S	METYALENLS(+79.97)PS(+79.97)PEDEK	12	17	LOW QUALITY PROTEIN: titin-like OS=Diaphorina citri OX=121845 GN=LOC103510529 PE=3 SV=1	LOW QUALITY PROTEIN: titin-like	LOC103510529	77.7	2111.8	4.4	1136	1152	S10:Phosphorylation (STY):118.11;S12:Phosphorylation (STY):130.84	S1147	LENLSPSPEDEKI	285.777	8325.97	10759.4	6457.05	19443.2	24930.7	17417.9	20597.3	0.31349	0.0218721
A0A3Q0JAM5	A0A3Q0JAM5|A0A3Q0JAM5_DIACI	S	RAES(+79.97)EPNLSTLAAPPEES	4	18	Transmembrane anterior posterior transformation protein 1 homolog OS=Diaphorina citri OX=121845 GN=LOC103517670 PE=3 SV=1	Transmembrane anterior posterior transformation protein 1 homolog	LOC103517670	50.77	1976.87	4.7	296	313	S4:Phosphorylation (STY):23.70	S299	MFKRAESEPNLST	1676.34	4157.68	1487.55	2440.52	7092.58	7906.35	8396.21	7798.38	0.312953	0.00469241
A0A1S4EB34	A0A1S4EB34|A0A1S4EB34_DIACI:A0A1S4EAS0|A0A1S4EAS0_DIACI:A0A1S4EB47|A0A1S4EB47_DIACI:A0A1S3D041|A0A1S3D041_DIACI:A0A1S4EB39|A0A1S4EB39_DIACI:A0A1S4EAX2|A0A1S4EAX2_DIACI	S	VLKPPGGGS(+79.97)SDIFGGASEPANPQPER	9	26	Microtubule-associated protein Jupiter-like isoform X4 OS=Diaphorina citri OX=121845 GN=LOC103508654 PE=4 SV=1	Microtubule-associated protein Jupiter-like isoform X4	LOC103508654	39.61	2643.23	-1.6	23	48	S9:Phosphorylation (STY):0.00	S31	KPPGGGSSDIFGG	40.8577	136.623	94.7785	90.753	308.552	271.71	290.522	290.261	0.31266	0.00255351
A0A1S3D116	A0A1S3D116|A0A1S3D116_DIACI	S	AEES(+79.97)AAET(+79.97)AEGPAAGAPAEK	4	20	Flightin OS=Diaphorina citri OX=121845 GN=LOC103508322 PE=4 SV=1	Flightin	LOC103508322	61.08	2015.78	1.9	20	39		S23	EPKAEESAAETAE	1347.12	720.781	511.008	859.637	2222.85	2305.69	3761.06	2763.2	0.311102	0.0271581
A0A1S3D116	A0A1S3D116|A0A1S3D116_DIACI	T	AEES(+79.97)AAET(+79.97)AEGPAAGAPAEK	8	20	Flightin OS=Diaphorina citri OX=121845 GN=LOC103508322 PE=4 SV=1	Flightin	LOC103508322	61.08	2015.78	1.9	20	39		T27	EESAAETAEGPAA	1347.12	720.781	511.008	859.637	2222.85	2305.69	3761.06	2763.2	0.311102	0.0271581
A0A3Q0IQY5	A0A3Q0IQY5|A0A3Q0IQY5_DIACI	S	S(+79.97)ANNLNNEIIDSNVVNVK	1	18	Spindle pole component SPC72-like OS=Diaphorina citri OX=121845 GN=LOC103508224 PE=4 SV=1	Spindle pole component SPC72-like	LOC103508224	68.72	2035.96	0.6	32	49	S1:Phosphorylation (STY):128.61	S32	HNVKPKSANNLNN	2794.14	3027.13	4802.83	3541.36	9206.71	9082.35	15883.4	11390.8	0.310897	0.0282388
A0A3Q0IY17	A0A3Q0IY17|A0A3Q0IY17_DIACI	T	KLSNT(+79.97)STGDMPLPNR	5	15	Actin cytoskeleton-regulatory complex protein PAN1 OS=Diaphorina citri OX=121845 GN=LOC103511627 PE=4 SV=1	Actin cytoskeleton-regulatory complex protein PAN1	LOC103511627	41.36	1709.78	-0.4	163	177	T5:Phosphorylation (STY):0.00	T167	ARKLSNTSTGDMP	3533.86	2729.06	1297.43	2520.11	6348.98	10275.3	7789.49	8137.91	0.309676	0.0131002
A0A1S4E804	A0A1S4E804|A0A1S4E804_DIACI:A0A1S3CX92|A0A1S3CX92_DIACI	S	EVDEDGS(+79.97)GELEFNEFC(+57.02)TLAAK	7	21	Troponin C-like OS=Diaphorina citri OX=121845 GN=LOC108252022 PE=4 SV=1	Troponin C-like	LOC108252022	45.74	2438.98	0.6	58	78	S7:Phosphorylation (STY):58.64;C16:Carbamidomethylation:1000.00	S64	EVDEDGSGELEFN	192.507	241.736	194.599	209.614	582.752	723.929	726.223	677.634	0.309332	0.000730783
A0A3Q0ITW8	A0A3Q0ITW8|A0A3Q0ITW8_DIACI	S	TETDIPISTLILTPS(+79.97)K	15	16	Uncharacterized protein LOC103507446 OS=Diaphorina citri OX=121845 GN=LOC103507446 PE=4 SV=1	Uncharacterized protein LOC103507446	LOC103507446	61.48	1807.92	4.8	88	103	S15:Phosphorylation (STY):8.22	S102	TLILTPSKSYALV	532.405	1624.47	1109.05	1088.64	4180.47	2979.39	3403.67	3521.17	0.309169	0.00674732
A0A1S3CXE5	A0A1S3CXE5|A0A1S3CXE5_DIACI	S	ILS(+79.97)DLKKPVTPK	3	12	Uncharacterized protein LOC103507051 OS=Diaphorina citri OX=121845 GN=LOC103507051 PE=4 SV=1	Uncharacterized protein LOC103507051	LOC103507051	69.08	1417.79	4.8	210	221	S3:Phosphorylation (STY):61.82	S212	ALRKILSDLKKPV	2266.14	2599.16	3084.69	2650	5112.98	8273.64	12354.7	8580.43	0.308842	0.0482562
A0A1S3DTX0	A0A1S3DTX0|A0A1S3DTX0_DIACI	T	LGILVPT(+79.97)SDSGES(+79.97)LPIPGK	7	19	Uncharacterized protein LOC103524587 OS=Diaphorina citri OX=121845 GN=LOC103524587 PE=4 SV=1	Uncharacterized protein LOC103524587	LOC103524587	43.25	2038.96	7.7	21	39	T7:Phosphorylation (STY):10.11;S13:Phosphorylation (STY):2.47	T27	LGILVPTSDSGES	790.417	4582.07	5763.1	3711.86	11961.7	13193.2	11241.6	12132.2	0.305953	0.00630707
A0A1S3DTX0	A0A1S3DTX0|A0A1S3DTX0_DIACI	S	LGILVPT(+79.97)SDSGES(+79.97)LPIPGK	13	19	Uncharacterized protein LOC103524587 OS=Diaphorina citri OX=121845 GN=LOC103524587 PE=4 SV=1	Uncharacterized protein LOC103524587	LOC103524587	43.25	2038.96	7.7	21	39	T7:Phosphorylation (STY):10.11;S13:Phosphorylation (STY):2.47	S33	TSDSGESLPIPGK	790.417	4582.07	5763.1	3711.86	11961.7	13193.2	11241.6	12132.2	0.305953	0.00630707
A0A3Q0ITT6	A0A3Q0ITT6|A0A3Q0ITT6_DIACI	T	NTAVVEEPIYGNLKPDHAEYVTVT(+79.97)PDST(+79.97)DSPK	24	32	Uncharacterized protein LOC103509596 OS=Diaphorina citri OX=121845 GN=LOC103509596 PE=4 SV=1	Uncharacterized protein LOC103509596	LOC103509596	31.42	3645.62	1	241	272	T24:Phosphorylation (STY):0.00;T28:Phosphorylation (STY):0.00	T264	AEYVTVTPDSTDS	1009.58	741.114	691.082	813.927	3341.6	2824.23	1863.78	2676.54	0.304097	0.0137611
A0A3Q0ITT6	A0A3Q0ITT6|A0A3Q0ITT6_DIACI	T	NTAVVEEPIYGNLKPDHAEYVTVT(+79.97)PDST(+79.97)DSPK	28	32	Uncharacterized protein LOC103509596 OS=Diaphorina citri OX=121845 GN=LOC103509596 PE=4 SV=1	Uncharacterized protein LOC103509596	LOC103509596	31.42	3645.62	1	241	272	T24:Phosphorylation (STY):0.00;T28:Phosphorylation (STY):0.00	T268	TVTPDSTDSPKKT	1009.58	741.114	691.082	813.927	3341.6	2824.23	1863.78	2676.54	0.304097	0.0137611
A0A3Q0JBQ7	A0A3Q0JBQ7|A0A3Q0JBQ7_DIACI	S	NELFEISS(+79.97)DKLK	8	12	Uncharacterized protein LOC113471143 OS=Diaphorina citri OX=121845 GN=LOC113471143 PE=4 SV=1	Uncharacterized protein LOC113471143	LOC113471143	53.49	1501.71	-1	267	278	S8:Phosphorylation (STY):9.34	S274	ELFEISSDKLKSD	593.629	3178.97	3091.6	2288.06	6472.61	6742.14	9361.1	7525.28	0.30405	0.0138765
A0A1S3D7M4	A0A1S3D7M4|A0A1S3D7M4_DIACI	S	NVALS(+79.97)TEDLNPTC(+57.02)DC(+57.02)NSR	5	18	Uncharacterized protein LOC103513107 OS=Diaphorina citri OX=121845 GN=LOC103513107 PE=4 SV=1	Uncharacterized protein LOC103513107	LOC103513107	59.14	2144.85	0.2	896	913	S5:Phosphorylation (STY):0.00;C13:Carbamidomethylation:1000.00;C15:Carbamidomethylation:1000.00	S900	VKNVALSTEDLNP	1616.65	2277.95	1782.56	1892.39	5173.31	4266.73	9238.98	6226.34	0.303932	0.0482636
A0A1S4EHK4	A0A1S4EHK4|A0A1S4EHK4_DIACI	S	LSSSPSSGLYSTS(+79.97)PK	13	15	UBA-like domain-containing protein 2 OS=Diaphorina citri OX=121845 GN=LOC103514398 PE=3 SV=1	UBA-like domain-containing protein 2	LOC103514398	77.27	1576.7	0.6	88	102	S13:Phosphorylation (STY):12.28	S100	SGLYSTSPKQQHQ	7115.04	13298.1	11057.9	10490.3	27923.4	34686.9	40946.4	34518.9	0.303901	0.00450883
A0A1S4ENV6	A0A1S4ENV6|A0A1S4ENV6_DIACI	T	STT(+79.97)SPELPPPR	3	11	Uncharacterized protein LOC103519952 OS=Diaphorina citri OX=121845 GN=LOC103519952 PE=4 SV=1	Uncharacterized protein LOC103519952	LOC103519952	38.08	1260.58	-1.9	850	860	T3:Phosphorylation (STY):0.00	T852	AKSRSTTSPELPP	554.86	107.409	728.457	463.575	1688.12	1808.62	1085.74	1527.49	0.303487	0.0214656
A0A1S3CVX1	A0A1S3CVX1|A0A1S3CVX1_DIACI	S	IFTC(+57.02)ESS(+79.97)LPDIAQLTR	7	16	Uncharacterized protein LOC103505570 OS=Diaphorina citri OX=121845 GN=LOC103505570 PE=4 SV=1	Uncharacterized protein LOC103505570	LOC103505570	67.82	1929.89	5.1	423	438	C4:Carbamidomethylation:1000.00;S7:Phosphorylation (STY):21.94	S429	IFTCESSLPDIAQ	943.859	7303.2	8996.62	5747.89	16911.3	13408.6	26505.6	18941.8	0.30345	0.0460899
A0A3Q0IWV0	A0A3Q0IWV0|A0A3Q0IWV0_DIACI	S	DSSDLTYNTSTPSS(+79.97)R	14	15	Protein stoned-B OS=Diaphorina citri OX=121845 GN=LOC103511042 PE=3 SV=1	Protein stoned-B	LOC103511042	70.93	1709.68	2	319	333	S14:Phosphorylation (STY):11.06	S332	NTSTPSSRKASIT	4799.61	2238.73	20908.9	9315.74	31268.2	30022.1	30963.1	30751.2	0.302939	0.0215669
A0A3Q0J0B8	A0A3Q0J0B8|A0A3Q0J0B8_DIACI	S	M(+15.99)NSILDTDS(+79.97)PSR	9	12	Twitchin-like OS=Diaphorina citri OX=121845 GN=LOC103512724 PE=3 SV=1	Twitchin-like	LOC103512724	59.65	1430.57	-1.7	1293	1304	M1:Oxidation (M):1000.00;S9:Phosphorylation (STY):20.41	S1301	SILDTDSPSRSRS	2398.09	3653.29	14460.9	6837.44	18847.3	22279.8	26627.3	22584.8	0.302746	0.0238971
A0A3Q0IZ57	A0A3Q0IZ57|A0A3Q0IZ57_DIACI	Y	DDFPAPPYPY(+79.97)SDPER	10	15	LOW QUALITY PROTEIN: actin-binding LIM protein 1 OS=Diaphorina citri OX=121845 GN=LOC103512164 PE=4 SV=1	LOW QUALITY PROTEIN: actin-binding LIM protein 1	LOC103512164	62.05	1844.73	4.2	328	342	Y10:Phosphorylation (STY):7.65	Y337	PAPPYPYSDPERR	8025.65	447.447	3816.16	4096.42	12958.4	14895.5	12741.6	13531.8	0.302724	0.0147504
A0A3Q0JJG5	A0A3Q0JJG5|A0A3Q0JJG5_DIACI	S	LYEEC(+57.02)S(+79.97)VPNT(+79.97)PIVK	6	14	Uncharacterized protein LOC113472925 OS=Diaphorina citri OX=121845 GN=LOC113472925 PE=4 SV=1	Uncharacterized protein LOC113472925	LOC113472925	38.04	1807.75	4.1	282	295	C5:Carbamidomethylation:1000.00;S6:Phosphorylation (STY):22.37;T10:Phosphorylation (STY):29.57	S287	KLYEECSVPNTPI	739.817	256.949	704.896	567.221	1785.22	2529.9	1327.84	1880.99	0.301555	0.0265829
A0A3Q0JJG5	A0A3Q0JJG5|A0A3Q0JJG5_DIACI	T	LYEEC(+57.02)S(+79.97)VPNT(+79.97)PIVK	10	14	Uncharacterized protein LOC113472925 OS=Diaphorina citri OX=121845 GN=LOC113472925 PE=4 SV=1	Uncharacterized protein LOC113472925	LOC113472925	38.04	1807.75	4.1	282	295	C5:Carbamidomethylation:1000.00;S6:Phosphorylation (STY):22.37;T10:Phosphorylation (STY):29.57	T291	ECSVPNTPIVKNK	739.817	256.949	704.896	567.221	1785.22	2529.9	1327.84	1880.99	0.301555	0.0265829
A0A1S4EGX5	A0A1S4EGX5|A0A1S4EGX5_DIACI	S	RDS(+79.97)QASQSSTMSSMSQPSAAQQR	3	23	Synapsin OS=Diaphorina citri OX=121845 GN=LOC103513662 PE=3 SV=1	Synapsin	LOC103513662	56.19	2535.05	4.8	270	292	S3:Phosphorylation (STY):12.33	S272	NEPRRDSQASQSS	163.636	309.859	547.284	340.26	1435.79	832.32	1125.01	1131.04	0.300838	0.0187785
A0A3Q0IRV5	A0A3Q0IRV5|A0A3Q0IRV5_DIACI:A0A3Q0IRU0|A0A3Q0IRU0_DIACI	S	SGS(+79.97)EFTEHWGIR	3	12	Uncharacterized protein LOC103508656 isoform X2 OS=Diaphorina citri OX=121845 GN=LOC103508656 PE=4 SV=1	Uncharacterized protein LOC103508656 isoform X2	LOC103508656	53.98	1484.61	0.1	843	854	S3:Phosphorylation (STY):8.22	S845	SLARSGSEFTEHW	722.299	183.288	459.726	455.104	1435.47	1847.62	1256.46	1513.18	0.30076	0.0106758
A0A3Q0J2G9	A0A3Q0J2G9|A0A3Q0J2G9_DIACI	S	KLES(+79.97)TEEILILER	4	13	Probable GPI-anchored adhesin-like protein PGA55 OS=Diaphorina citri OX=121845 GN=LOC103514012 PE=4 SV=1	Probable GPI-anchored adhesin-like protein PGA55	LOC103514012	44.8	1651.84	3.7	87	99	S4:Phosphorylation (STY):12.28	S90	SNRKLESTEEILI	300.477	322.367	244.671	289.172	1109.98	1048.92	736.539	965.147	0.299614	0.0045896
A0A1S4E8W0	A0A1S4E8W0|A0A1S4E8W0_DIACI:A0A1S3D2G6|A0A1S3D2G6_DIACI	S	VETNS(+79.97)ELMLEPK	5	12	Longitudinals lacking protein, isoforms A/B/D/L-like OS=Diaphorina citri OX=121845 GN=LOC103507035 PE=4 SV=1	Longitudinals lacking protein, isoforms A/B/D/L-like	LOC103507035	47.59	1468.65	-4.4	90	101	S5:Phosphorylation (STY):6.59	S94	AKVETNSELMLEP	365.565	200.371	524.286	363.407	1055.95	1569.13	1014.06	1213.05	0.299582	0.0135078
A0A3Q0J430	A0A3Q0J430|A0A3Q0J430_DIACI	S	WS(+79.97)SMELLNEEDESPSPSVASR	2	21	Protein retinal degeneration B OS=Diaphorina citri OX=121845 GN=LOC103512409 PE=3 SV=1	Protein retinal degeneration B	LOC103512409	56.17	2429.01	0.7	446	466	S2:Phosphorylation (STY):0.00	S447	SSLAKWSSMELLN	1211.21	3464.09	4956.07	3210.46	9807.95	13867	8532.45	10735.8	0.299043	0.0179168
A0A3Q0JAS9	A0A3Q0JAS9|A0A3Q0JAS9_DIACI	T	VPLSPST(+79.97)VISVDTER	7	15	leucine--tRNA ligase OS=Diaphorina citri OX=121845 GN=LOC103517877 PE=3 SV=1	leucine--tRNA ligase	LOC103517877	43.44	1678.82	0.9	1424	1438	T7:Phosphorylation (STY):0.00	T1430	VPLSPSTVISVDT	169.058	1339.14	793.933	767.376	2360.67	2623.54	2804.25	2596.15	0.295582	0.00720278
A0A3Q0IJE5	A0A3Q0IJE5|A0A3Q0IJE5_DIACI	S	VPPGTQHYIEEGTS(+79.97)NL	14	16	Pollen-specific leucine-rich repeat extensin-like protein 2 OS=Diaphorina citri OX=121845 GN=LOC103505110 PE=4 SV=1	Pollen-specific leucine-rich repeat extensin-like protein 2	LOC103505110	41.39	1820.8	1.8	181	196	S14:Phosphorylation (STY):7.65	S194	YIEEGTSNL____	724.615	3872.08	1493.88	2030.19	5868.65	6188.46	8603.41	6886.84	0.294793	0.0192793
A0A3Q0JCC1	A0A3Q0JCC1|A0A3Q0JCC1_DIACI	S	SYS(+79.97)PVQSTLGSSSVYR	3	16	Uncharacterized protein LOC103516377 OS=Diaphorina citri OX=121845 GN=LOC103516377 PE=4 SV=1	Uncharacterized protein LOC103516377	LOC103516377	54.1	1796.8	-9.7	103	118	S3:Phosphorylation (STY):14.04	S105	HSQRSYSPVQSTL	85.921	116.981	113.26	105.387	397.518	196.841	479.276	357.878	0.294478	0.0403813
A0A3Q0J5R5	A0A3Q0J5R5|A0A3Q0J5R5_DIACI:A0A3Q0J0R2|A0A3Q0J0R2_DIACI	S	TS(+79.97)PSSQVEDSEFDMFAQSR	2	19	TOM1-like protein 2 isoform X1 OS=Diaphorina citri OX=121845 GN=LOC103512928 PE=3 SV=1	TOM1-like protein 2 isoform X1	LOC103512928	41.97	2226.88	2.5	349	367	S2:Phosphorylation (STY):0.00	S350	QPPAKTSPSSQVE	1184.05	4465.16	1933.31	2527.5	9461.42	10571.6	5718.76	8583.92	0.294446	0.0268388
A0A1S3CXE5	A0A1S3CXE5|A0A1S3CXE5_DIACI	S	S(+79.97)KPNT(+79.97)PELPTESTTQPTVPEVLIESNK	1	27	Uncharacterized protein LOC103507051 OS=Diaphorina citri OX=121845 GN=LOC103507051 PE=4 SV=1	Uncharacterized protein LOC103507051	LOC103507051	86.4	3095.44	2.1	258	284	S1:Phosphorylation (STY):66.16;T5:Phosphorylation (STY):61.26	S258	LGTDFKSKPNTPE	54454.9	65632.6	71895	63994.2	171277	168489	313864	217876	0.293718	0.0332829
A0A1S3CXE5	A0A1S3CXE5|A0A1S3CXE5_DIACI	T	S(+79.97)KPNT(+79.97)PELPTESTTQPTVPEVLIESNK	5	27	Uncharacterized protein LOC103507051 OS=Diaphorina citri OX=121845 GN=LOC103507051 PE=4 SV=1	Uncharacterized protein LOC103507051	LOC103507051	86.4	3095.44	2.1	258	284	S1:Phosphorylation (STY):66.16;T5:Phosphorylation (STY):61.26	T262	FKSKPNTPELPTE	54454.9	65632.6	71895	63994.2	171277	168489	313864	217876	0.293718	0.0332829
A0A3Q0INZ3	A0A3Q0INZ3|A0A3Q0INZ3_DIACI	S	IMEAVES(+79.97)GSES(+79.97)R	7	12	acetyl-CoA carboxylase OS=Diaphorina citri OX=121845 GN=LOC103507248 PE=4 SV=1	acetyl-CoA carboxylase	LOC103507248	64.98	1453.52	0.1	503	514	S7:Phosphorylation (STY):6.59;S11:Phosphorylation (STY):0.00	S509	IMEAVESGSESRN	6939	1705.35	4574.72	4406.36	10347.2	15701.2	18959.8	15002.7	0.293703	0.0224607
A0A3Q0INZ3	A0A3Q0INZ3|A0A3Q0INZ3_DIACI	S	IMEAVES(+79.97)GSES(+79.97)R	11	12	acetyl-CoA carboxylase OS=Diaphorina citri OX=121845 GN=LOC103507248 PE=4 SV=1	acetyl-CoA carboxylase	LOC103507248	64.98	1453.52	0.1	503	514	S7:Phosphorylation (STY):6.59;S11:Phosphorylation (STY):0.00	S513	VESGSESRNSTSI	6939	1705.35	4574.72	4406.36	10347.2	15701.2	18959.8	15002.7	0.293703	0.0224607
A0A3Q0ITU7	A0A3Q0ITU7|A0A3Q0ITU7_DIACI	T	VEGET(+79.97)EPS(+79.97)DEVEEAK	5	15	Gelsolin-related protein of 125 kDa-like OS=Diaphorina citri OX=121845 GN=LOC103509595 PE=4 SV=1	Gelsolin-related protein of 125 kDa-like	LOC103509595	31.44	1806.65	4.3	151	165		T155	EKVEGETEPSDEV	277.442	367.463	706.51	450.472	1953.52	1055.76	1615.39	1541.56	0.292218	0.0203068
A0A3Q0ITU7	A0A3Q0ITU7|A0A3Q0ITU7_DIACI	S	VEGET(+79.97)EPS(+79.97)DEVEEAK	8	15	Gelsolin-related protein of 125 kDa-like OS=Diaphorina citri OX=121845 GN=LOC103509595 PE=4 SV=1	Gelsolin-related protein of 125 kDa-like	LOC103509595	31.44	1806.65	4.3	151	165		S158	EGETEPSDEVEEA	277.442	367.463	706.51	450.472	1953.52	1055.76	1615.39	1541.56	0.292218	0.0203068
A0A1S3D4B1	A0A1S3D4B1|A0A1S3D4B1_DIACI	S	KLNGHSDVPLS(+79.97)PSTETPPVPVK	11	22	Src substrate cortactin OS=Diaphorina citri OX=121845 GN=LOC103510325 PE=4 SV=1	Src substrate cortactin	LOC103510325	47.44	2378.19	-0.7	327	348	S11:Phosphorylation (STY):10.19	S337	HSDVPLSPSTETP	1126.87	41.8941	245.993	471.585	1525.07	1821.51	1511.11	1619.23	0.29124	0.0299794
A0A1S3DHM6	A0A1S3DHM6|A0A1S3DHM6_DIACI	S	LLIEEIPIS(+79.97)PGTIK	9	14	Uncharacterized protein LOC103518777 isoform X1 OS=Diaphorina citri OX=121845 GN=LOC103518777 PE=4 SV=1	Uncharacterized protein LOC103518777 isoform X1	LOC103518777	66.29	1601.87	-1.2	32	45	S9:Phosphorylation (STY):7.77	S40	IEEIPISPGTIKR	1956.04	6165.28	2913.18	3678.16	11412.8	11366.8	15121.5	12633.7	0.291139	0.00733474
A0A3Q0J5R5	A0A3Q0J5R5|A0A3Q0J5R5_DIACI:A0A3Q0J0R2|A0A3Q0J0R2_DIACI	T	T(+79.97)SPSSQVEDSEFDMFAQSR	1	19	TOM1-like protein 2 isoform X1 OS=Diaphorina citri OX=121845 GN=LOC103512928 PE=3 SV=1	TOM1-like protein 2 isoform X1	LOC103512928	61.19	2226.88	4.6	349	367	T1:Phosphorylation (STY):0.00	T349	SQPPAKTSPSSQV	1094.3	4465.16	1933.31	2497.59	9461.42	10571.6	5718.76	8583.92	0.290961	0.0269715
A0A1S4EHZ0	A0A1S4EHZ0|A0A1S4EHZ0_DIACI	S	VC(+57.02)ISNLTTS(+79.97)DDR	9	12	Uncharacterized protein LOC103514382 OS=Diaphorina citri OX=121845 GN=LOC103514382 PE=4 SV=2	Uncharacterized protein LOC103514382	LOC103514382	58.7	1459.6	0.8	94	105	C2:Carbamidomethylation:1000.00;S9:Phosphorylation (STY):12.28	S102	ISNLTTSDDRCKI	2885.98	6408.88	5923.65	5072.83	12193.5	16144.2	24036.1	17458	0.290574	0.0274861
A0A1S3D314	A0A1S3D314|A0A1S3D314_DIACI	S	LC(+57.02)EPMYS(+79.97)PTASPVFM(+15.99)PPFR	7	19	protein phosphatase methylesterase-1 OS=Diaphorina citri OX=121845 GN=LOC103510336 PE=3 SV=1	protein phosphatase methylesterase-1	LOC103510336	26.51	2321.99	5.5	504	522	C2:Carbamidomethylation:1000.00;S7:Phosphorylation (STY):0.00;M15:Oxidation (M):14.66	S510	LCEPMYSPTASPV	650.567	455.32	157.09	420.992	1619.66	1107.24	1619.85	1448.91	0.290557	0.00997488
A0A3Q0J9I5	A0A3Q0J9I5|A0A3Q0J9I5_DIACI	S	SSS(+79.97)AGASLGPEIAK	3	14	Uncharacterized protein LOC113469837 OS=Diaphorina citri OX=121845 GN=LOC113469837 PE=4 SV=1	Uncharacterized protein LOC113469837	LOC113469837	55.07	1353.62	1.1	294	307	S3:Phosphorylation (STY):0.00	S296	PRPRSSSAGASLG	525.538	192.706	372.588	363.611	1478.5	1497.52	780.485	1252.17	0.290385	0.0251728
A0A1S3DFV1	A0A1S3DFV1|A0A1S3DFV1_DIACI	S	M(+15.99)TIASS(+79.97)SSSSSISSAASGAGSK	6	22	Protein argonaute-2 OS=Diaphorina citri OX=121845 GN=LOC103517620 PE=4 SV=1	Protein argonaute-2	LOC103517620	49.15	2055.87	-0.1	1	22	M1:Oxidation (M):1000.00;S6:Phosphorylation (STY):0.00	S6	_MTIASSSSSSSI	145.725	323.081	339.621	269.476	828.896	783.062	1183.44	931.8	0.289199	0.00930756
A0A3Q0IP74	A0A3Q0IP74|A0A3Q0IP74_DIACI	Y	PNEVPSDEDY(+79.97)NWEER	10	15	Protein lap4 OS=Diaphorina citri OX=121845 GN=LOC103505322 PE=4 SV=1	Protein lap4	LOC103505322	24.73	1957.74	2.7	378	392	Y10:Phosphorylation (STY):6.65	Y387	VPSDEDYNWEERE	233.298	883.896	419.561	512.252	991.838	2066.8	2274.88	1777.84	0.288132	0.0458146
A0A3Q0IMT1	A0A3Q0IMT1|A0A3Q0IMT1_DIACI	S	GFVTVQS(+79.97)PEYGDTS(+79.97)PR	7	16	THO complex subunit 2 OS=Diaphorina citri OX=121845 GN=LOC103506838 PE=3 SV=1	THO complex subunit 2	LOC103506838	67.58	1898.75	3	1428	1443	S7:Phosphorylation (STY):61.77;S14:Phosphorylation (STY):10.11	S1434	GFVTVQSPEYGDT	2907.46	1094.85	134.181	1378.83	3806.74	5035.88	5538.27	4793.63	0.287638	0.0238119
A0A3Q0IMT1	A0A3Q0IMT1|A0A3Q0IMT1_DIACI	S	GFVTVQS(+79.97)PEYGDTS(+79.97)PR	14	16	THO complex subunit 2 OS=Diaphorina citri OX=121845 GN=LOC103506838 PE=3 SV=1	THO complex subunit 2	LOC103506838	67.58	1898.75	3	1428	1443	S7:Phosphorylation (STY):61.77;S14:Phosphorylation (STY):10.11	S1441	PEYGDTSPRYVHN	2907.46	1094.85	134.181	1378.83	3806.74	5035.88	5538.27	4793.63	0.287638	0.0238119
A0A3Q0ILF6	A0A3Q0ILF6|A0A3Q0ILF6_DIACI	S	SEWS(+79.97)DEDDGNDDEEK	4	15	Probable serine/threonine-protein kinase kinX OS=Diaphorina citri OX=121845 GN=LOC103506203 PE=4 SV=1	Probable serine/threonine-protein kinase kinX	LOC103506203	53.74	1848.58	0.3	516	530	S4:Phosphorylation (STY):32.97	S519	AFKSEWSDEDDGN	473.277	1129.37	979.817	860.82	2583.47	3293.23	3106.11	2994.27	0.287489	0.0018356
A0A3Q0INM2	A0A3Q0INM2|A0A3Q0INM2_DIACI	S	IIYPPSS(+79.97)NPTS(+79.97)PTMGR	7	16	Proteoglycan 4 OS=Diaphorina citri OX=121845 GN=LOC103524819 PE=4 SV=1	Proteoglycan 4	LOC103524819	47.95	1876.78	-4.5	235	250	S7:Phosphorylation (STY):0.00;S11:Phosphorylation (STY):0.00	S241	IIYPPSSNPTSPT	12402.7	5741.42	5235.4	7793.16	25566	33422	23034.7	27340.9	0.285037	0.00734154
A0A3Q0INM2	A0A3Q0INM2|A0A3Q0INM2_DIACI	S	IIYPPSS(+79.97)NPTS(+79.97)PTMGR	11	16	Proteoglycan 4 OS=Diaphorina citri OX=121845 GN=LOC103524819 PE=4 SV=1	Proteoglycan 4	LOC103524819	47.95	1876.78	-4.5	235	250	S7:Phosphorylation (STY):0.00;S11:Phosphorylation (STY):0.00	S245	PSSNPTSPTMGRR	12402.7	5741.42	5235.4	7793.16	25566	33422	23034.7	27340.9	0.285037	0.00734154
A0A3Q0IXP7	A0A3Q0IXP7|A0A3Q0IXP7_DIACI	S	ADALQQGAS(+79.97)QFEQQAGK	9	17	Vesicle-associated membrane protein 2 OS=Diaphorina citri OX=121845 GN=LOC103508917 PE=4 SV=1	Vesicle-associated membrane protein 2	LOC103508917	54.64	1855.81	3	68	84		S76	ALQQGASQFEQQA	487.475	621.27	446.406	518.384	1964.99	2277.59	1242.89	1828.49	0.283504	0.0135445
A0A3Q0JGR3	A0A3Q0JGR3|A0A3Q0JGR3_DIACI:A0A3Q0IHM1|A0A3Q0IHM1_DIACI:A0A1S3DM46|A0A1S3DM46_DIACI	T	ST(+79.97)SDNETTTSTSTTEATTGVK	2	21	Mucin-5AC-like OS=Diaphorina citri OX=121845 GN=LOC103520802 PE=4 SV=1	Mucin-5AC-like	LOC103520802	59.19	2197.91	-6.7	162	182	T2:Phosphorylation (STY):0.00	T163	EEKRKSTSDNETT	410.791	657.734	471.839	513.455	2154.37	1422.23	1863.48	1813.36	0.28315	0.00448765
A0A3Q0IL42	A0A3Q0IL42|A0A3Q0IL42_DIACI	T	DT(+79.97)STSSPPTEPSWTSSTSAEK	2	21	Ankyrin-3-like OS=Diaphorina citri OX=121845 GN=LOC103505993 PE=4 SV=1	Ankyrin-3-like	LOC103505993	65.73	2261.92	1.5	2195	2215	T2:Phosphorylation (STY):0.00	T2196	PADFKDTSTSSPP	6633.53	27197.7	4436.58	12755.9	38830.8	37510.7	59135.2	45158.9	0.282468	0.0324065
A0A3Q0ITT6	A0A3Q0ITT6|A0A3Q0ITT6_DIACI	S	ESAVS(+79.97)KSPVGSSIPS(+79.97)PTK	5	18	Uncharacterized protein LOC103509596 OS=Diaphorina citri OX=121845 GN=LOC103509596 PE=4 SV=1	Uncharacterized protein LOC103509596	LOC103509596	41.3	1916.85	2	414	431	S5:Phosphorylation (STY):0.00;S15:Phosphorylation (STY):0.00	S418	SKESAVSKSPVGS	4808.51	5198.78	3438.29	4481.86	16848.5	14730.1	16029.7	15869.5	0.28242	0.000152685
A0A3Q0ITT6	A0A3Q0ITT6|A0A3Q0ITT6_DIACI	S	ESAVS(+79.97)KSPVGSSIPS(+79.97)PTK	15	18	Uncharacterized protein LOC103509596 OS=Diaphorina citri OX=121845 GN=LOC103509596 PE=4 SV=1	Uncharacterized protein LOC103509596	LOC103509596	41.3	1916.85	2	414	431	S5:Phosphorylation (STY):0.00;S15:Phosphorylation (STY):0.00	S428	VGSSIPSPTKGDS	4808.51	5198.78	3438.29	4481.86	16848.5	14730.1	16029.7	15869.5	0.28242	0.000152685
A0A1S3DHM6	A0A1S3DHM6|A0A1S3DHM6_DIACI	S	TLAS(+79.97)PQLQNSSK	4	12	Uncharacterized protein LOC103518777 isoform X1 OS=Diaphorina citri OX=121845 GN=LOC103518777 PE=4 SV=1	Uncharacterized protein LOC103518777 isoform X1	LOC103518777	55.08	1352.63	-2.5	106	117	S4:Phosphorylation (STY):49.37	S109	QKRTLASPQLQNS	634.934	2687.25	1575.85	1632.68	4989.74	4480.38	7894.4	5788.17	0.282072	0.0269544
A0A3Q0IM99	A0A3Q0IM99|A0A3Q0IM99_DIACI	S	SNISSS(+79.97)SVSLSSAAVR	6	16	Probable serine/threonine-protein kinase DDB_G0282963 OS=Diaphorina citri OX=121845 GN=LOC103506496 PE=4 SV=1	Probable serine/threonine-protein kinase DDB_G0282963	LOC103506496	56.99	1630.76	2.2	527	542	S6:Phosphorylation (STY):0.00	S532	KSNISSSSVSLSS	114.164	197.552	127.797	146.504	600.494	611.237	346.444	519.392	0.282069	0.0145013
A0A3Q0J6K3	A0A3Q0J6K3|A0A3Q0J6K3_DIACI	T	DLVLPSPT(+79.97)SPSSR	8	13	Uncharacterized protein LOC103515666 OS=Diaphorina citri OX=121845 GN=LOC103515666 PE=4 SV=1	Uncharacterized protein LOC103515666	LOC103515666	46.43	1434.68	-4.1	556	568	T8:Phosphorylation (STY):7.21	T563	LVLPSPTSPSSRG	375.092	205.754	174.33	251.725	1267.66	735.878	677.29	893.609	0.281695	0.0315541
A0A3Q0J213	A0A3Q0J213|A0A3Q0J213_DIACI	S	FSDGKS(+79.97)EPT(+79.97)SPVVK	6	14	Rho GTPase-activating protein 92B OS=Diaphorina citri OX=121845 GN=LOC103511419 PE=4 SV=1	Rho GTPase-activating protein 92B	LOC103511419	39.62	1636.68	-1.6	407	420	S6:Phosphorylation (STY):11.12;T9:Phosphorylation (STY):0.00	S412	KFSDGKSEPTSPV	2474.46	554.537	352.311	1127.1	3351.06	4886.7	3781.99	4006.58	0.281313	0.0242875
A0A3Q0J213	A0A3Q0J213|A0A3Q0J213_DIACI	T	FSDGKS(+79.97)EPT(+79.97)SPVVK	9	14	Rho GTPase-activating protein 92B OS=Diaphorina citri OX=121845 GN=LOC103511419 PE=4 SV=1	Rho GTPase-activating protein 92B	LOC103511419	39.62	1636.68	-1.6	407	420	S6:Phosphorylation (STY):11.12;T9:Phosphorylation (STY):0.00	T415	DGKSEPTSPVVKF	2474.46	554.537	352.311	1127.1	3351.06	4886.7	3781.99	4006.58	0.281313	0.0242875
A0A1S3D5X6	A0A1S3D5X6|A0A1S3D5X6_DIACI	T	QVPLPQIT(+79.97)SNTELFFK	8	16	Uncharacterized protein LOC103511934 OS=Diaphorina citri OX=121845 GN=LOC103511934 PE=4 SV=1	Uncharacterized protein LOC103511934	LOC103511934	45.84	1940.96	7.8	233	248	T8:Phosphorylation (STY):9.34	T240	VPLPQITSNTELF	792.754	433.902	194.822	473.826	1212.94	2412.62	1436.1	1687.22	0.280832	0.0407744
A0A3Q0IN52	A0A3Q0IN52|A0A3Q0IN52_DIACI	S	TAYS(+79.97)NGSQSIVSEDFK	4	16	LOW QUALITY PROTEIN: titin OS=Diaphorina citri OX=121845 GN=LOC103524768 PE=4 SV=1	LOW QUALITY PROTEIN: titin	LOC103524768	40.65	1811.76	12.4	199	214	S4:Phosphorylation (STY):9.42	S202	SEKTAYSNGSQSI	563.032	64.7758	330.001	319.269	1041.03	910.198	1460.5	1137.24	0.28074	0.0204179
A0A3Q0IL42	A0A3Q0IL42|A0A3Q0IL42_DIACI	S	KS(+79.97)ELFEGVTQGLLANVK	2	17	Ankyrin-3-like OS=Diaphorina citri OX=121845 GN=LOC103505993 PE=4 SV=1	Ankyrin-3-like	LOC103505993	55.33	1911.97	1.2	2153	2169	S2:Phosphorylation (STY):18.48	S2154	LEERRKSELFEGV	1475.91	1282.93	1168.86	1309.24	5565.49	6069.98	2365.39	4666.96	0.280533	0.0447385
A0A3Q0IVT1	A0A3Q0IVT1|A0A3Q0IVT1_DIACI	S	TLTELNHQPAS(+79.97)PVAVR	11	16	Flocculation protein FLO11 OS=Diaphorina citri OX=121845 GN=LOC103510530 PE=4 SV=1	Flocculation protein FLO11	LOC103510530	38.66	1811.89	1.8	846	861	S11:Phosphorylation (STY):35.88	S856	LNHQPASPVAVRR	641.469	782.065	1176.11	866.548	2500.56	3825.79	2944.67	3090.34	0.280405	0.00616239
A0A3Q0IW49	A0A3Q0IW49|A0A3Q0IW49_DIACI	S	RENS(+79.97)FLQK	4	8	Uncharacterized protein LOC103510710 OS=Diaphorina citri OX=121845 GN=LOC103510710 PE=4 SV=1	Uncharacterized protein LOC103510710	LOC103510710	28.62	1100.5	-1.4	10	17		S13	ELKRENSFLQKHK	1241.27	1103.28	2234.3	1526.28	4268.44	4171.67	7893.79	5444.63	0.280328	0.037233
A0A3Q0JDE7	A0A3Q0JDE7|A0A3Q0JDE7_DIACI:A0A1S3DG14|A0A1S3DG14_DIACI:A0A1S3DHK3|A0A1S3DHK3_DIACI:A0A1S3DG10|A0A1S3DG10_DIACI	T	TRPT(+79.97)STGGLLPPPPGSGMSK	4	20	NECAP-like protein CG9132 OS=Diaphorina citri OX=121845 GN=LOC103516591 PE=4 SV=1	NECAP-like protein CG9132	LOC103516591	27.23	2016.97	0.7	18	37	T4:Phosphorylation (STY):0.00	T21	KAKTRPTSTGGLL	803.629	1918.31	2227.67	1649.87	5129.89	7166.72	5368.73	5888.45	0.280188	0.0054314
A0A1S3DK93	A0A1S3DK93|A0A1S3DK93_DIACI	S	SRNS(+79.97)FTTLFK	4	10	Uncharacterized protein LOC103520093 isoform X1 OS=Diaphorina citri OX=121845 GN=LOC103520093 PE=4 SV=1	Uncharacterized protein LOC103520093 isoform X1	LOC103520093	34.47	1279.6	-3	354	363	S4:Phosphorylation (STY):0.00	S357	TSKSRNSFTTLFK	333.548	1682.36	1611.87	1209.26	2589.21	4649.87	5743.43	4327.5	0.279436	0.0381341
A0A1S3D4W4	A0A3Q0IZK0|A0A3Q0IZK0_DIACI:A0A1S3D4W4|A0A1S3D4W4_DIACI	S	FDS(+79.97)AGSMQITQRPVR	3	15	Uncharacterized protein LOC103511395 OS=Diaphorina citri OX=121845 GN=LOC103511395 PE=4 SV=1	Uncharacterized protein LOC103511395	LOC103511395	29.34	1771.81	3	355	369	S3:Phosphorylation (STY):19.05	S357	SITKFDSAGSMQI	354.353	1559.05	1498.6	1137.33	2854.21	3909.53	5459.14	4074.29	0.279149	0.0261184
A0A1S3CVP8	A0A1S3CVP8|A0A1S3CVP8_DIACI	S	KYS(+79.97)ADVLEDK	3	10	Uncharacterized protein LOC103506125 OS=Diaphorina citri OX=121845 GN=LOC103506125 PE=4 SV=2	Uncharacterized protein LOC103506125	LOC103506125	49.63	1246.55	-4.4	51	60	S3:Phosphorylation (STY):23.10	S53	NTGRKYSADVLED	788.059	725.099	1087.71	866.956	2714.91	2549.74	4061.12	3108.59	0.278891	0.0103356
A0A1S3DUC8	A0A1S3DUC8|A0A1S3DUC8_DIACI	S	ES(+79.97)TDQGSEVTITEVQDK	2	17	Four and a half LIM domains protein 2 isoform X1 OS=Diaphorina citri OX=121845 GN=LOC103523348 PE=4 SV=1	Four and a half LIM domains protein 2 isoform X1	LOC103523348	69.83	1944.82	1.1	28	44	S2:Phosphorylation (STY):0.00	S29	SGKRRESTDQGSE	116.938	12038.8	10676.4	7610.71	24544.4	28645	28733.7	27307.7	0.278702	0.0079955
A0A1S3DCT9	A0A1S3DCT9|A0A1S3DCT9_DIACI	S	KQS(+79.97)VPLPNEPK	3	11	Uncharacterized protein LOC103515999 OS=Diaphorina citri OX=121845 GN=LOC103515999 PE=4 SV=1	Uncharacterized protein LOC103515999	LOC103515999	49.18	1315.65	-1.5	736	746		S738	TELKKQSVPLPNE	728.137	799.232	1417.62	981.662	3471.39	3741.22	3361.42	3524.68	0.278511	0.00049654
A0A1S3DUC8	A0A1S3DUC8|A0A1S3DUC8_DIACI	T	EST(+79.97)DQGSEVTITEVQDK	3	17	Four and a half LIM domains protein 2 isoform X1 OS=Diaphorina citri OX=121845 GN=LOC103523348 PE=4 SV=1	Four and a half LIM domains protein 2 isoform X1	LOC103523348	68.63	1944.82	2.4	28	44	T3:Phosphorylation (STY):0.00	T30	GKRRESTDQGSEV	88.0853	12038.8	10676.4	7601.09	24544.4	28645	28733.7	27307.7	0.278349	0.00804486
A0A1S3DMX5	A0A1S3DMX5|A0A1S3DMX5_DIACI	T	DATQT(+79.97)PVTALS(+79.97)PSR	5	14	Tyrosine-protein phosphatase non-receptor type 13-like OS=Diaphorina citri OX=121845 GN=LOC103521707 PE=4 SV=2	Tyrosine-protein phosphatase non-receptor type 13-like	LOC103521707	54.99	1602.67	-1	35	48	T5:Phosphorylation (STY):18.53;S11:Phosphorylation (STY):32.28	T39	YRDATQTPVTALS	598.873	527.175	393.2	506.416	1973.64	1731.18	1760.18	1821.67	0.277996	0.000173677
A0A1S3DMX5	A0A1S3DMX5|A0A1S3DMX5_DIACI	S	DATQT(+79.97)PVTALS(+79.97)PSR	11	14	Tyrosine-protein phosphatase non-receptor type 13-like OS=Diaphorina citri OX=121845 GN=LOC103521707 PE=4 SV=2	Tyrosine-protein phosphatase non-receptor type 13-like	LOC103521707	54.99	1602.67	-1	35	48	T5:Phosphorylation (STY):18.53;S11:Phosphorylation (STY):32.28	S45	TPVTALSPSRQHK	598.873	527.175	393.2	506.416	1973.64	1731.18	1760.18	1821.67	0.277996	0.000173677
A0A3Q0J881	A0A3Q0J881|A0A3Q0J881_DIACI	S	QSEAADSETATPATPASPES(+79.97)SEK	20	23	Neurofilament heavy polypeptide OS=Diaphorina citri OX=121845 GN=LOC103516499 PE=4 SV=1	Neurofilament heavy polypeptide	LOC103516499	62.1	2369.97	-1.5	270	292	S20:Phosphorylation (STY):0.00	S289	TPASPESSEKKSK	101.749	736.224	562.534	466.836	979.74	1891.32	2197.58	1689.55	0.276308	0.0411882
A0A1S3DEM1	A0A1S3DEM1|A0A1S3DEM1_DIACI	S	MS(+79.97)DQPMYQS(+79.97)R	2	10	Uncharacterized protein LOC103516882 isoform X1 OS=Diaphorina citri OX=121845 GN=LOC103516882 PE=4 SV=1	Uncharacterized protein LOC103516882 isoform X1	LOC103516882	36.63	1401.45	-0.5	156	165	S2:Phosphorylation (STY):52.68;S9:Phosphorylation (STY):15.73	S157	RSQIRMSDQPMYQ	245.616	278.103	200.024	241.247	687.746	901.872	1034.64	874.754	0.275789	0.00361626
A0A1S3DEM1	A0A1S3DEM1|A0A1S3DEM1_DIACI	S	MS(+79.97)DQPMYQS(+79.97)R	9	10	Uncharacterized protein LOC103516882 isoform X1 OS=Diaphorina citri OX=121845 GN=LOC103516882 PE=4 SV=1	Uncharacterized protein LOC103516882 isoform X1	LOC103516882	36.63	1401.45	-0.5	156	165	S2:Phosphorylation (STY):52.68;S9:Phosphorylation (STY):15.73	S164	DQPMYQSRNTMGG	245.616	278.103	200.024	241.247	687.746	901.872	1034.64	874.754	0.275789	0.00361626
A0A1S3D7M4	A0A1S3D7M4|A0A1S3D7M4_DIACI	T	NVALST(+79.97)EDLNPTC(+57.02)DC(+57.02)NSR	6	18	Uncharacterized protein LOC103513107 OS=Diaphorina citri OX=121845 GN=LOC103513107 PE=4 SV=1	Uncharacterized protein LOC103513107	LOC103513107	53.71	2144.85	1.6	896	913	T6:Phosphorylation (STY):0.00;C13:Carbamidomethylation:1000.00;C15:Carbamidomethylation:1000.00	T901	KNVALSTEDLNPT	1086.38	2277.95	1782.56	1715.63	5173.31	4266.73	9238.98	6226.34	0.275544	0.0451166
A0A1S3DH23	A0A1S3DH23|A0A1S3DH23_DIACI	S	TWLHATANNNS(+79.97)QQYFK	11	16	Uncharacterized protein LOC103518240 OS=Diaphorina citri OX=121845 GN=LOC103518240 PE=4 SV=1	Uncharacterized protein LOC103518240	LOC103518240	43.6	2001.87	2.4	576	591	S11:Phosphorylation (STY):7.77	S586	ATANNNSQQYFKA	240.324	4468.08	3704.37	2804.26	7500.08	10161.3	12887.4	10182.9	0.275388	0.0219788
A0A1S3DB58	A0A1S3DB58|A0A1S3DB58_DIACI	S	S(+79.97)DVKSEEAPAPAPAATPAESPAK	1	23	Eukaryotic translation initiation factor 5B-like OS=Diaphorina citri OX=121845 GN=LOC103514258 PE=4 SV=1	Eukaryotic translation initiation factor 5B-like	LOC103514258	76.85	2300.06	-1.6	41	63	S1:Phosphorylation (STY):0.00	S41	AKNDVKSDVKSEE	3742.29	17794.7	40503.6	20680.2	65202.3	95188.8	65123.7	75171.6	0.275107	0.020521
A0A3Q0J404	A0A3Q0J404|A0A3Q0J404_DIACI:A0A3Q0J4L2|A0A3Q0J4L2_DIACI	S	TGS(+79.97)SPAMMQTIEVIEK	3	16	Uncharacterized protein LOC103512348 OS=Diaphorina citri OX=121845 GN=LOC103512348 PE=4 SV=1	Uncharacterized protein LOC103512348	LOC103512348	44.43	1800.8	-2.6	151	166	S3:Phosphorylation (STY):0.00	S153	SHARTGSSPAMMQ	626.952	352.26	69.8255	349.679	1001.08	1624.31	1193.11	1272.83	0.274725	0.019532
A0A1S3CXE5	A0A1S3CXE5|A0A1S3CXE5_DIACI	S	EQPIDTEPIS(+79.97)IEPVRPESSQSS(+79.97)NHIGFIPK	10	30	Uncharacterized protein LOC103507051 OS=Diaphorina citri OX=121845 GN=LOC103507051 PE=4 SV=1	Uncharacterized protein LOC103507051	LOC103507051	27.24	3490.61	2.8	174	203	S10:Phosphorylation (STY):0.00;S22:Phosphorylation (STY):0.00	S183	IDTEPISIEPVRP	1128.02	4010.43	8619.31	4585.92	14655.6	18318.7	17294.2	16756.2	0.273686	0.00754735
A0A1S3CXE5	A0A1S3CXE5|A0A1S3CXE5_DIACI	S	EQPIDTEPIS(+79.97)IEPVRPESSQSS(+79.97)NHIGFIPK	22	30	Uncharacterized protein LOC103507051 OS=Diaphorina citri OX=121845 GN=LOC103507051 PE=4 SV=1	Uncharacterized protein LOC103507051	LOC103507051	27.24	3490.61	2.8	174	203	S10:Phosphorylation (STY):0.00;S22:Phosphorylation (STY):0.00	S195	PESSQSSNHIGFI	1128.02	4010.43	8619.31	4585.92	14655.6	18318.7	17294.2	16756.2	0.273686	0.00754735
A0A1S4EPN2	A0A1S4EPN2|A0A1S4EPN2_DIACI:A0A3Q0JGT8|A0A3Q0JGT8_DIACI	S	LAANTS(+79.97)FAPQTGDK	6	14	Voltage-dependent anion-selective channel-like OS=Diaphorina citri OX=121845 GN=LOC103520845 PE=3 SV=1	Voltage-dependent anion-selective channel-like	LOC103520845	46.37	1499.67	5.2	95	108	S6:Phosphorylation (STY):8.14	S100	RLAANTSFAPQTG	738.409	10128.3	9252.02	6706.23	15430.8	25859.4	32266.1	24518.8	0.273514	0.0362532
A0A1S3DUC8	A0A1S3DUC8|A0A1S3DUC8_DIACI	T	REST(+79.97)DQGSEVTITEVQDKENYLVNGK	4	26	Four and a half LIM domains protein 2 isoform X1 OS=Diaphorina citri OX=121845 GN=LOC103523348 PE=4 SV=1	Four and a half LIM domains protein 2 isoform X1	LOC103523348	47.24	3018.38	1.9	27	52	T4:Phosphorylation (STY):0.00	T30	GKRRESTDQGSEV	1990.24	37299	3464.28	14251.2	39401.2	60657.8	56772.6	52277.2	0.272608	0.0455205
A0A1S3D979	A0A1S3D979|A0A1S3D979_DIACI:A0A1S3D7M2|A0A1S3D7M2_DIACI:A0A3Q0J2K9|A0A3Q0J2K9_DIACI	S	LNTPIENDS(+79.97)LENIPR	9	15	Protein PF14_0175-like isoform X2 OS=Diaphorina citri OX=121845 GN=LOC103513084 PE=4 SV=1	Protein PF14_0175-like isoform X2	LOC103513084	58.73	1803.84	2.7	26	40	S9:Phosphorylation (STY):45.99	S34	TPIENDSLENIPR	616.746	4195.12	3713.56	2841.81	9140.91	8495.23	13903	10513	0.270313	0.0197921
A0A1S3DLJ3	A0A1S3DLJ3|A0A1S3DLJ3_DIACI	S	DQSDS(+79.97)LTLENNENR	5	14	Uncharacterized protein LOC103520995 OS=Diaphorina citri OX=121845 GN=LOC103520995 PE=4 SV=1	Uncharacterized protein LOC103520995	LOC103520995	25.47	1713.68	-3.8	215	228	S5:Phosphorylation (STY):17.01	S219	ERDQSDSLTLENN	234.979	267.407	396.147	299.511	714.84	1609.93	1015.28	1113.35	0.269018	0.0383413
A0A3Q0IY17	A0A3Q0IY17|A0A3Q0IY17_DIACI	S	KLSNTS(+79.97)TGDMPLPNR	6	15	Actin cytoskeleton-regulatory complex protein PAN1 OS=Diaphorina citri OX=121845 GN=LOC103511627 PE=4 SV=1	Actin cytoskeleton-regulatory complex protein PAN1	LOC103511627	33.38	1709.78	2.1	163	177	S6:Phosphorylation (STY):0.00	S168	RKLSNTSTGDMPL	3982.72	2729.06	700.882	2470.89	7077.63	10275.3	10240.8	9197.9	0.268636	0.00922636
A0A3Q0J0C2	A0A3Q0J0C2|A0A3Q0J0C2_DIACI:A0A3Q0IVA9|A0A3Q0IVA9_DIACI	S	SRSNLTDKS(+79.97)VTK	9	12	Uncharacterized protein LOC103512695 OS=Diaphorina citri OX=121845 GN=LOC103512695 PE=4 SV=1	Uncharacterized protein LOC103512695	LOC103512695	27.92	1414.68	1.7	64	75	S9:Phosphorylation (STY):0.00	S72	SNLTDKSVTKEYR	2090.93	741.22	3569.54	2133.9	7271.86	9970.92	6602.44	7948.41	0.268469	0.0114713
A0A3Q0IT51	A0A3Q0IT51|A0A3Q0IT51_DIACI:A0A3Q0IT53|A0A3Q0IT53_DIACI:A0A3Q0IYE3|A0A3Q0IYE3_DIACI	S	DNLAPYVDNS(+79.97)SDIK	10	14	Spindle pole body component 110-like isoform X2 OS=Diaphorina citri OX=121845 GN=LOC113467456 PE=4 SV=1	Spindle pole body component 110-like isoform X2	LOC113467456	38.34	1629.69	3	330	343	S10:Phosphorylation (STY):17.01	S339	APYVDNSSDIKIT	1117.38	891.432	1756.46	1255.09	4350.57	4494.06	5190.43	4678.35	0.268276	0.000731978
A0A3Q0IT51	A0A3Q0IT51|A0A3Q0IT51_DIACI:A0A3Q0IT53|A0A3Q0IT53_DIACI:A0A3Q0IYE3|A0A3Q0IYE3_DIACI	S	DNLAPYVDNSS(+79.97)DIK	11	14	Spindle pole body component 110-like isoform X2 OS=Diaphorina citri OX=121845 GN=LOC113467456 PE=4 SV=1	Spindle pole body component 110-like isoform X2	LOC113467456	49.74	1629.69	1.4	330	343	S11:Phosphorylation (STY):7.65	S340	PYVDNSSDIKITK	1117.38	891.432	1756.46	1255.09	4350.57	4494.06	5190.43	4678.35	0.268276	0.000731978
A0A3Q0J1A3	A0A3Q0J1A3|A0A3Q0J1A3_DIACI	S	TLS(+79.97)VGFGGTTSPLEQR	3	16	DmX-like protein 1 OS=Diaphorina citri OX=121845 GN=LOC103513584 PE=4 SV=1	DmX-like protein 1	LOC103513584	69.64	1728.81	3.8	143	158	S3:Phosphorylation (STY):5.99	S145	SRSRTLSVGFGGT	72.2347	202.292	398.372	224.3	644.245	1169.38	703.405	839.009	0.267339	0.0324405
A0A1S3D3A4	A0A1S3D3A4|A0A1S3D3A4_DIACI	S	S(+79.97)SPASFNTRPIIVNK	1	15	Uncharacterized protein LOC103510471 OS=Diaphorina citri OX=121845 GN=LOC103510471 PE=4 SV=1	Uncharacterized protein LOC103510471	LOC103510471	46.68	1709.85	1.9	26	40	S1:Phosphorylation (STY):0.00	S26	KLFQQKSSPASFN	1142.14	2793.91	2310.92	2082.32	5876.18	6889.52	10722.1	7829.28	0.265966	0.0209142
A0A1S3D3A4	A0A1S3D3A4|A0A1S3D3A4_DIACI	S	SS(+79.97)PASFNTRPIIVNK	2	15	Uncharacterized protein LOC103510471 OS=Diaphorina citri OX=121845 GN=LOC103510471 PE=4 SV=1	Uncharacterized protein LOC103510471	LOC103510471	26.44	1709.85	2.8	26	40	S2:Phosphorylation (STY):0.00	S27	LFQQKSSPASFNT	1142.14	2793.91	2310.92	2082.32	5876.18	6889.52	10722.1	7829.28	0.265966	0.0209142
A0A1S4EML9	A0A1S4EML9|A0A1S4EML9_DIACI	Y	GLLHKY(+79.97)SNEVLTAQDSAQR	6	19	Uncharacterized protein LOC103518729 OS=Diaphorina citri OX=121845 GN=LOC103518729 PE=4 SV=1	Uncharacterized protein LOC103518729	LOC103518729	62.15	2209.05	-5.5	251	269	Y6:Phosphorylation (STY):0.00	Y256	KGLLHKYSNEVLT	1582.16	592.559	3862.41	2012.38	5595.24	9479.26	7879	7651.17	0.263016	0.0191809
A0A3Q0J580	A0A3Q0J580|A0A3Q0J580_DIACI	T	M(+15.99)SGGAT(+79.97)DDDEVVVAAFR	6	17	Myosin regulatory light chain 2 OS=Diaphorina citri OX=121845 GN=LOC103515034 PE=4 SV=1	Myosin regulatory light chain 2	LOC103515034	52.25	1834.74	4.7	54	70	M1:Oxidation (M):1000.00;T6:Phosphorylation (STY):16.51	T59	RMSGGATDDDEVV	435.671	766.46	134.203	445.445	1731.19	1347.72	2018.43	1699.11	0.262163	0.00929292
A0A1S3DMW1	A0A1S3DMW1|A0A1S3DMW1_DIACI:A0A3Q0IW49|A0A3Q0IW49_DIACI	Y	TKSSPAGY(+79.97)DTNVPTETLYK	8	19	Uncharacterized protein LOC103520848 OS=Diaphorina citri OX=121845 GN=LOC103520848 PE=4 SV=1	Uncharacterized protein LOC103520848	LOC103520848	25.97	2150.98	2.4	223	241	Y8:Phosphorylation (STY):0.00	Y230	KSSPAGYDTNVPT	2187.69	834.287	949.413	1323.8	3879.41	4397.35	6873.58	5050.11	0.262132	0.0217391
A0A1S3D900	A0A1S3D900|A0A1S3D900_DIACI	S	LLEETDGTPTS(+79.97)AEGR	11	15	Protein CDV3 homolog A-like OS=Diaphorina citri OX=121845 GN=LOC103513058 PE=3 SV=1	Protein CDV3 homolog A-like	LOC103513058	46.12	1654.71	1.3	39	53	S11:Phosphorylation (STY):7.21	S49	TDGTPTSAEGRRK	1204.29	101.019	406.754	570.689	1935.03	1535.38	3064.8	2178.41	0.261976	0.046326
A0A3Q0JAF4	A0A3Q0JAF4|A0A3Q0JAF4_DIACI	S	VGS(+79.97)SIFGER	3	9	Pyridoxal phosphate homeostasis protein OS=Diaphorina citri OX=121845 GN=LOC103517590 PE=3 SV=1	Pyridoxal phosphate homeostasis protein	LOC103517590	46.94	1030.45	-4.1	258	266	S3:Phosphorylation (STY):14.02	S260	TNVRVGSSIFGER	763.43	211.678	91.1562	355.421	1115.36	1135.8	1824.13	1358.43	0.261641	0.0323079
A0A3Q0JGI1	A0A3Q0JGI1|A0A3Q0JGI1_DIACI	S	LVNSENPYAPDKS(+79.97)PSK	13	16	Uncharacterized protein LOC113472112 OS=Diaphorina citri OX=121845 GN=LOC113472112 PE=4 SV=1	Uncharacterized protein LOC113472112	LOC113472112	45.49	1824.83	1.7	449	464	S13:Phosphorylation (STY):22.85	S461	PYAPDKSPSKLSK	682.588	2344.56	204.325	1077.16	3633.84	3484.7	5313.68	4144.07	0.259928	0.0247244
A0A3Q0IJE7	A0A3Q0IJE7|A0A3Q0IJE7_DIACI	S	IPTASASTSTS(+79.97)PLVIAK	11	17	LOW QUALITY PROTEIN: zinc finger and BTB domain-containing protein 49-like OS=Diaphorina citri OX=121845 GN=LOC103505235 PE=4 SV=1	LOW QUALITY PROTEIN: zinc finger and BTB domain-containing protein 49-like	LOC103505235	38.36	1722.88	1.4	191	207	S11:Phosphorylation (STY):0.00	S201	SASTSTSPLVIAK	425.867	604.56	482.145	504.191	1889.48	1887.73	2064.79	1947.33	0.258913	5.26618e-05
A0A3Q0IUW2	A0A3Q0IUW2|A0A3Q0IUW2_DIACI	S	S(+79.97)GEEEGDGDTLMNETDK	1	17	Transcription elongation regulator 1 OS=Diaphorina citri OX=121845 GN=LOC103510122 PE=4 SV=1	Transcription elongation regulator 1	LOC103510122	68.87	1905.68	-7.3	92	108	S1:Phosphorylation (STY):66.45	S92	DDTGARSGEEEGD	416.967	381.353	612.438	470.252	1838.83	1983.01	1636.39	1819.41	0.258464	0.000399449
A0A1S3DI25	A0A1S3DI25|A0A1S3DI25_DIACI	T	T(+79.97)ASSC(+57.02)SLPLILRPR	1	14	Synaptonemal complex protein 1-like OS=Diaphorina citri OX=121845 GN=LOC103519091 PE=4 SV=1	Synaptonemal complex protein 1-like	LOC103519091	26.5	1649.83	3.3	319	332	T1:Phosphorylation (STY):0.00;C5:Carbamidomethylation:1000.00	T319	SIGCMRTASSCSL	246.029	357.013	150.642	251.228	653.172	964.556	1298.29	972.004	0.258464	0.0211042
A0A3Q0IYN3	A0A3Q0IYN3|A0A3Q0IYN3_DIACI	S	LSAC(+57.02)PS(+79.97)DISIDENC(+57.02)PIHGK	6	19	Uncharacterized protein LOC108252728 OS=Diaphorina citri OX=121845 GN=LOC108252728 PE=4 SV=1	Uncharacterized protein LOC108252728	LOC108252728	33.88	2191.93	0.6	86	104	C4:Carbamidomethylation:1000.00;S6:Phosphorylation (STY):0.00;C14:Carbamidomethylation:1000.00	S91	RLSACPSDISIDE	140.471	1814.92	655.715	870.37	2973.67	2380.29	4807.48	3387.15	0.256962	0.0463115
A0A3Q0IJT0	A0A3Q0IJT0|A0A3Q0IJT0_DIACI	S	SKPVTPSSPVSTPTS(+79.97)PTGPGR	15	21	ATP citrate synthase OS=Diaphorina citri OX=121845 GN=LOC103505301 PE=3 SV=1	ATP citrate synthase	LOC103505301	79.71	2116.02	-0.2	355	375	S15:Phosphorylation (STY):10.11	S369	PVSTPTSPTGPGR	52583.9	56637.9	154537	87919.6	315769	341062	373224	343352	0.256063	0.00236687
A0A3Q0JAS9	A0A3Q0JAS9|A0A3Q0JAS9_DIACI	S	VPLSPS(+79.97)TVISVDTER	6	15	leucine--tRNA ligase OS=Diaphorina citri OX=121845 GN=LOC103517877 PE=3 SV=1	leucine--tRNA ligase	LOC103517877	50.03	1678.82	1	1424	1438	S6:Phosphorylation (STY):7.65	S1429	KVPLSPSTVISVD	169.058	1339.14	793.933	767.376	2360.67	3852.54	2804.25	3005.82	0.255297	0.0158509
A0A3Q0JJW2	A0A3Q0JJW2|A0A3Q0JJW2_DIACI	S	FSNGS(+79.97)VEYLIR	5	11	Chromobox protein homolog 5-like OS=Diaphorina citri OX=121845 GN=LOC103523078 PE=4 SV=1	Chromobox protein homolog 5-like	LOC103523078	66.74	1363.62	-4.9	42	52	S5:Phosphorylation (STY):47.09	S46	RKFSNGSVEYLIR	268.061	568.546	652.404	496.337	2805.72	1499.69	1547.29	1950.9	0.254414	0.0304578
A0A1S3DAJ3	A0A1S3DAJ3|A0A1S3DAJ3_DIACI	S	AKGDLS(+79.97)LDLDQLDC(+57.02)AC(+57.02)K	6	17	Uncharacterized protein LOC103514595 isoform X1 OS=Diaphorina citri OX=121845 GN=LOC103514595 PE=4 SV=1	Uncharacterized protein LOC103514595 isoform X1	LOC103514595	40.37	2000.86	1.1	138	154	C14:Carbamidomethylation:1000.00;C16:Carbamidomethylation:1000.00	S143	KAKGDLSLDLDQL	95.2391	2721.98	2640.7	1819.31	4602.65	8598.61	8395.93	7199.06	0.252714	0.0260687
A0A3Q0IYQ3	A0A3Q0IYQ3|A0A3Q0IYQ3_DIACI	S	VGS(+79.97)IEQMNLLTR	3	12	Liprin-alpha-1-like OS=Diaphorina citri OX=121845 GN=LOC103512090 PE=4 SV=1	Liprin-alpha-1-like	LOC103512090	62.89	1439.68	0.1	275	286	S3:Phosphorylation (STY):81.34	S277	LESRVGSIEQMNL	138.742	429.19	520.344	362.758	1777.14	1527.31	1008.09	1437.51	0.252352	0.0133648
A0A1S4E9M2	A0A1S4E9M2|A0A1S4E9M2_DIACI	S	ETDDDS(+79.97)KERDDEEK	6	14	Aspartyl/asparaginyl beta-hydroxylase-like OS=Diaphorina citri OX=121845 GN=LOC108252154 PE=3 SV=2	Aspartyl/asparaginyl beta-hydroxylase-like	LOC108252154	33.57	1789.65	-2.3	237	250	S6:Phosphorylation (STY):28.70	S242	KETDDDSKERDDE	1320.61	1279.72	67.4632	889.265		3119.79	3931.73	3525.76	0.252219	0.0229156
A0A3Q0JE46	A0A3Q0JE46|A0A3Q0JE46_DIACI:A0A3Q0J881|A0A3Q0J881_DIACI:A0A3Q0JCB6|A0A3Q0JCB6_DIACI	T	AELPPPLPQSPPPTEVPPPTPT(+79.97)PVEEK	22	27	Uncharacterized protein LOC103519410 OS=Diaphorina citri OX=121845 GN=LOC103519410 PE=4 SV=1	Uncharacterized protein LOC103519410	LOC103519410	60.17	2920.45	2.5	66	92	T22:Phosphorylation (STY):0.00	T87	VPPPTPTPVEEKK	545.399	1995.06	730.849	1090.44	3187.01	4568.01	5271.39	4342.14	0.251129	0.013039
A0A3Q0JBV5	A0A3Q0JBV5|A0A3Q0JBV5_DIACI	S	AQEEGFS(+79.97)DEDFDEEPLPPK	7	19	Muscle M-line assembly protein unc-89-like OS=Diaphorina citri OX=121845 GN=LOC103515826 PE=4 SV=1	Muscle M-line assembly protein unc-89-like	LOC103515826	62.78	2257.89	-0.4	293	311		S299	AQEEGFSDEDFDE	1822.01	1239.05	2546.69	1869.25	8089.86	7886.09	6377.66	7451.2	0.250865	0.00106639
A0A1S3DI25	A0A1S3DI25|A0A1S3DI25_DIACI	S	TAS(+79.97)SC(+57.02)S(+79.97)LPLILRPR	3	14	Synaptonemal complex protein 1-like OS=Diaphorina citri OX=121845 GN=LOC103519091 PE=4 SV=1	Synaptonemal complex protein 1-like	LOC103519091	37.82	1729.8	4.6	319	332	S3:Phosphorylation (STY):0.00;C5:Carbamidomethylation:1000.00;S6:Phosphorylation (STY):0.00	S321	GCMRTASSCSLPL	498.775	120.035	834.146	484.318	2105.43	2483.77	1245.8	1945	0.249007	0.0254702
A0A1S3DI25	A0A1S3DI25|A0A1S3DI25_DIACI	S	TAS(+79.97)SC(+57.02)S(+79.97)LPLILRPR	6	14	Synaptonemal complex protein 1-like OS=Diaphorina citri OX=121845 GN=LOC103519091 PE=4 SV=1	Synaptonemal complex protein 1-like	LOC103519091	37.82	1729.8	4.6	319	332	S3:Phosphorylation (STY):0.00;C5:Carbamidomethylation:1000.00;S6:Phosphorylation (STY):0.00	S324	RTASSCSLPLILR	498.775	120.035	834.146	484.318	2105.43	2483.77	1245.8	1945	0.249007	0.0254702
A0A1S3DD50	A0A1S3DD50|A0A1S3DD50_DIACI	S	S(+79.97)GTAVIDEDNS(+79.97)KDNK	1	15	Circumsporozoite protein-like OS=Diaphorina citri OX=121845 GN=LOC103516284 PE=4 SV=1	Circumsporozoite protein-like	LOC103516284	70.22	1751.67	0.5	109	123	S1:Phosphorylation (STY):11.10;S11:Phosphorylation (STY):170.86	S109	QQKDNRSGTAVID	2834.78	1289.61	11788.9	5304.45	17154.3	21971.1	25271.5	21465.6	0.247113	0.0160345
A0A1S3DD50	A0A1S3DD50|A0A1S3DD50_DIACI	S	S(+79.97)GTAVIDEDNS(+79.97)KDNK	11	15	Circumsporozoite protein-like OS=Diaphorina citri OX=121845 GN=LOC103516284 PE=4 SV=1	Circumsporozoite protein-like	LOC103516284	70.22	1751.67	0.5	109	123	S1:Phosphorylation (STY):11.10;S11:Phosphorylation (STY):170.86	S119	VIDEDNSKDNKKD	2834.78	1289.61	11788.9	5304.45	17154.3	21971.1	25271.5	21465.6	0.247113	0.0160345
A0A1S4EA97	A0A1S4EA97|A0A1S4EA97_DIACI	S	TSAS(+79.97)TPDGDVSFVSNK	4	16	Microtubule-associated protein OS=Diaphorina citri OX=121845 GN=LOC103508001 PE=4 SV=2	Microtubule-associated protein	LOC103508001	57.21	1690.71	-0.4	763	778	S4:Phosphorylation (STY):0.00	S766	TVKTSASTPDGDV	1468.14	2262.34	5540.82	3090.43	13123.7	12395.2	12022.4	12513.8	0.246963	0.00185527
A0A3Q0IHS2	A0A3Q0IHS2|A0A3Q0IHS2_DIACI	S	VS(+79.97)PTPSQESLVSQQSSEDPNAGYESSHNDR	2	30	WD repeat-containing protein 44 OS=Diaphorina citri OX=121845 GN=LOC103524571 PE=4 SV=1	WD repeat-containing protein 44	LOC103524571	31.97	3311.39	-6.3	478	507	S2:Phosphorylation (STY):14.04	S479	YNAEKVSPTPSQE	375.569	508.33	266.124	383.341	1721.21	1204.62	1752.75	1559.53	0.245806	0.00352813
A0A3Q0JL68	A0A3Q0JL68|A0A3Q0JL68_DIACI	S	M(+42.01)EVAPSS(+79.97)VEQFEAK	7	14	Uncharacterized protein LOC103520809 OS=Diaphorina citri OX=121845 GN=LOC103520809 PE=4 SV=1	Uncharacterized protein LOC103520809	LOC103520809	66.01	1672.71	1.8	1	14	M1:Acetylation (Protein N-term):1000.00;S7:Phosphorylation (STY):21.94	S7	MEVAPSSVEQFEA	1859.45	4489.94	3781.62	3377	16153.8	11196.5	14006.9	13785.7	0.244964	0.00313104
A0A3Q0ILW2	A0A3Q0ILW2|A0A3Q0ILW2_DIACI	S	SS(+79.97)NNMVVQQQTEVR	2	14	Glycogen debranching enzyme OS=Diaphorina citri OX=121845 GN=LOC103522335 PE=4 SV=1	Glycogen debranching enzyme	LOC103522335	57.73	1698.74	-1.3	74	87	S2:Phosphorylation (STY):0.00	S75	EIIQRSSNNMVVQ	1275.49	687.565	955.309	972.787	2670.84	5510.28	3756.82	3979.31	0.244461	0.0235805
A0A1S3CWI9	A0A1S3CWI9|A0A1S3CWI9_DIACI	S	VSFQDTSSVSHS(+79.97)PPSPVLEK	12	20	Uncharacterized protein DDB_G0283357-like OS=Diaphorina citri OX=121845 GN=LOC103506640 PE=4 SV=1	Uncharacterized protein DDB_G0283357-like	LOC103506640	28.59	2207.01	1.1	289	308	S12:Phosphorylation (STY):2.81	S300	TSSVSHSPPSPVL	866.374	436.191	367.608	556.724	1241.32	3218.06	2384.42	2281.27	0.244042	0.0439393
A0A1S3D3H0	A0A1S3D3H0|A0A1S3D3H0_DIACI	S	IKS(+79.97)QLS(+79.97)VIPSASVK	3	14	Spindle pole body component 110-like OS=Diaphorina citri OX=121845 GN=LOC103510668 PE=4 SV=1	Spindle pole body component 110-like	LOC103510668	34.13	1615.8	1.2	340	353	S3:Phosphorylation (STY):33.89;S6:Phosphorylation (STY):34.30	S342	GSMKIKSQLSVIP	504.75	350.927	155.956	337.211	1085.67	1334.92	1725.57	1382.05	0.243992	0.00785602
A0A1S3D3H0	A0A1S3D3H0|A0A1S3D3H0_DIACI	S	IKS(+79.97)QLS(+79.97)VIPSASVK	6	14	Spindle pole body component 110-like OS=Diaphorina citri OX=121845 GN=LOC103510668 PE=4 SV=1	Spindle pole body component 110-like	LOC103510668	34.13	1615.8	1.2	340	353	S3:Phosphorylation (STY):33.89;S6:Phosphorylation (STY):34.30	S345	KIKSQLSVIPSAS	504.75	350.927	155.956	337.211	1085.67	1334.92	1725.57	1382.05	0.243992	0.00785602
A0A3Q0IM19	A0A3Q0IM19|A0A3Q0IM19_DIACI	T	ATEDT(+79.97)VTSEEVKTPEMEAK	5	19	Uncharacterized protein LOC103506519 OS=Diaphorina citri OX=121845 GN=LOC103506519 PE=4 SV=1	Uncharacterized protein LOC103506519	LOC103506519	30.73	2173.93	-0.4	1172	1190	T5:Phosphorylation (STY):0.00	T1176	IKATEDTVTSEEV	934.258	443.994	3502.59	1626.95	8698.67	5988.3	5351.52	6679.5	0.243573	0.0224406
A0A3Q0IRV1	A0A3Q0IRV1|A0A3Q0IRV1_DIACI	S	SSS(+79.97)NLALNESKR	3	12	Uncharacterized protein LOC103506515 OS=Diaphorina citri OX=121845 GN=LOC103506515 PE=4 SV=1	Uncharacterized protein LOC103506515	LOC103506515	55.87	1384.63	-0.4	540	551	S3:Phosphorylation (STY):7.32	S542	KVSRSSSNLALNE	500.668	2421.21	1487.71	1469.86	5007.1	7375.67	5758.26	6047.01	0.243072	0.00683431
A0A1S3CYA2	A0A1S3CYA2|A0A1S3CYA2_DIACI:A0A1S3CY71|A0A1S3CY71_DIACI:A0A1S3CY67|A0A1S3CY67_DIACI	S	IFVGGLS(+79.97)PEMKDEEIK	7	16	RNA-binding protein squid isoform X4 OS=Diaphorina citri OX=121845 GN=LOC103507559 PE=4 SV=1	RNA-binding protein squid isoform X4	LOC103507559	39.51	1870.88	-0.4	113	128		S119	IFVGGLSPEMKDE	134.181	788.81	907.833	610.275	2015	3329.53	2193.87	2512.8	0.242866	0.0162547
A0A3Q0J6T4	A0A3Q0J6T4|A0A3Q0J6T4_DIACI	S	GAS(+79.97)SPSDSLGDYVQDNHNK	3	19	phospholipase A2 OS=Diaphorina citri OX=121845 GN=LOC103513752 PE=4 SV=1	phospholipase A2	LOC103513752	29.8	2069.83	-4.2	114	132	S3:Phosphorylation (STY):0.00	S116	LRPKGASSPSDSL	850.343	997.835	827.94	892.039	2781.36	3807.45	4465.87	3684.89	0.24208	0.00478794
A0A3Q0IU99	A0A3Q0IU99|A0A3Q0IU99_DIACI	S	GS(+79.97)ITLNTPDMLLK	2	13	Uncharacterized protein LOC103509770 OS=Diaphorina citri OX=121845 GN=LOC103509770 PE=4 SV=1	Uncharacterized protein LOC103509770	LOC103509770	56.21	1481.72	-2.7	53	65	S2:Phosphorylation (STY):14.04	S54	THHARGSITLNTP	165.031	71.3442	61.2327	99.2028	277.832	403.86	549.078	410.257	0.241807	0.0216307
A0A1S3D3H0	A0A1S3D3H0|A0A1S3D3H0_DIACI	S	IKS(+79.97)QLSVIPSASVK	3	14	Spindle pole body component 110-like OS=Diaphorina citri OX=121845 GN=LOC103510668 PE=4 SV=1	Spindle pole body component 110-like	LOC103510668	45.9	1535.83	-1.5	340	353	S3:Phosphorylation (STY):22.34	S342	GSMKIKSQLSVIP	119.641	114.336	179.686	137.887	373.795	462.955	874.457	570.403	0.241737	0.0498432
A0A3Q0JDE7	A0A3Q0JDE7|A0A3Q0JDE7_DIACI:A0A1S3DG14|A0A1S3DG14_DIACI:A0A1S3DHK3|A0A1S3DHK3_DIACI:A0A1S3DG10|A0A1S3DG10_DIACI	T	TRPTST(+79.97)GGLLPPPPGSGMSK	6	20	NECAP-like protein CG9132 OS=Diaphorina citri OX=121845 GN=LOC103516591 PE=4 SV=1	NECAP-like protein CG9132	LOC103516591	36.53	2016.97	2.2	18	37	T6:Phosphorylation (STY):0.00	T23	KTRPTSTGGLLPP	94.3255	3808.42	361.955	1421.57	5129.89	7166.72	5368.73	5888.45	0.241416	0.0302179
A0A3Q0IVQ8	A0A3Q0IVQ8|A0A3Q0IVQ8_DIACI	S	IEEES(+79.97)IVAVT(+79.97)PDDVNMPLK	5	19	LOW QUALITY PROTEIN: titin-like OS=Diaphorina citri OX=121845 GN=LOC103510529 PE=3 SV=1	LOW QUALITY PROTEIN: titin-like	LOC103510529	47.52	2257.98	-3.9	3599	3617		S3603	IRIEEESIVAVTP	211.147	319.639	1198.22	576.334	2572.01	2713.95	1888.7	2391.55	0.240988	0.0108046
A0A3Q0IVQ8	A0A3Q0IVQ8|A0A3Q0IVQ8_DIACI	T	IEEES(+79.97)IVAVT(+79.97)PDDVNMPLK	10	19	LOW QUALITY PROTEIN: titin-like OS=Diaphorina citri OX=121845 GN=LOC103510529 PE=3 SV=1	LOW QUALITY PROTEIN: titin-like	LOC103510529	47.52	2257.98	-3.9	3599	3617		T3608	ESIVAVTPDDVNM	211.147	319.639	1198.22	576.334	2572.01	2713.95	1888.7	2391.55	0.240988	0.0108046
A0A3Q0IIA2	A0A3Q0IIA2|A0A3Q0IIA2_DIACI:A0A1S3CVG7|A0A1S3CVG7_DIACI:A0A1S3CUB9|A0A1S3CUB9_DIACI:A0A1S3DUC8|A0A1S3DUC8_DIACI:A0A1S3CTA3|A0A1S3CTA3_DIACI	T	IIT(+79.97)S(+79.97)GGVTYK	3	10	Four and a half LIM domains protein 2 isoform X4 OS=Diaphorina citri OX=121845 GN=LOC103523348 PE=4 SV=1	Four and a half LIM domains protein 2 isoform X4	LOC103523348	27.42	1197.51	-1	188	197	T3:Phosphorylation (STY):0.00;S4:Phosphorylation (STY):0.00	T190	KCNKIITSGGVTY	255.632	269.209	639.91	388.25	1719.87	846.817	2302.13	1622.94	0.239227	0.0488999
A0A3Q0IIA2	A0A3Q0IIA2|A0A3Q0IIA2_DIACI:A0A1S3CVG7|A0A1S3CVG7_DIACI:A0A1S3CUB9|A0A1S3CUB9_DIACI:A0A1S3DUC8|A0A1S3DUC8_DIACI:A0A1S3CTA3|A0A1S3CTA3_DIACI	S	IIT(+79.97)S(+79.97)GGVTYK	4	10	Four and a half LIM domains protein 2 isoform X4 OS=Diaphorina citri OX=121845 GN=LOC103523348 PE=4 SV=1	Four and a half LIM domains protein 2 isoform X4	LOC103523348	27.42	1197.51	-1	188	197	T3:Phosphorylation (STY):0.00;S4:Phosphorylation (STY):0.00	S191	CNKIITSGGVTYK	255.632	269.209	639.91	388.25	1719.87	846.817	2302.13	1622.94	0.239227	0.0488999
A0A1S3D9X3	A0A1S3D9X3|A0A1S3D9X3_DIACI	S	SDASIS(+79.97)SDEDGGSSDAGYSSLAR	6	23	SWI5-dependent HO expression protein 3 isoform X1 OS=Diaphorina citri OX=121845 GN=LOC103513550 PE=4 SV=1	SWI5-dependent HO expression protein 3 isoform X1	LOC103513550	38.61	2312.89	-17.2	385	407	S6:Phosphorylation (STY):0.00	S390	KSDASISSDEDGG	77.8117	208.622	110.582	132.338	572.306	640.132	447.913	553.45	0.239115	0.0035788
A0A3Q0IZ57	A0A3Q0IZ57|A0A3Q0IZ57_DIACI	S	DDFPAPPYPYS(+79.97)DPER	11	15	LOW QUALITY PROTEIN: actin-binding LIM protein 1 OS=Diaphorina citri OX=121845 GN=LOC103512164 PE=4 SV=1	LOW QUALITY PROTEIN: actin-binding LIM protein 1	LOC103512164	60.92	1844.73	1.3	328	342	S11:Phosphorylation (STY):12.28	S338	APPYPYSDPERRR	4002.34	1797.89	3816.16	3205.46	12958.4	14895.5	12741.6	13531.8	0.236883	0.000464979
A0A3Q0IPJ2	A0A3Q0IPJ2|A0A3Q0IPJ2_DIACI	T	KT(+79.97)ISPEPEDGEVIVTSR	2	17	LOW QUALITY PROTEIN: obscurin-like OS=Diaphorina citri OX=121845 GN=LOC103507575 PE=3 SV=1	LOW QUALITY PROTEIN: obscurin-like	LOC103507575	37.07	1935.92	-0.8	1784	1800	T2:Phosphorylation (STY):0.00	T1785	VDSLRKTISPEPE	226.27	793.222	1920.81	980.099	2603.41	5794.31	4022.31	4140.01	0.236738	0.0394376
A0A3Q0IL42	A0A3Q0IL42|A0A3Q0IL42_DIACI	T	GDQKPVTTETTTTTIQT(+79.97)PGIENPVVSTTITK	17	31	Ankyrin-3-like OS=Diaphorina citri OX=121845 GN=LOC103505993 PE=4 SV=1	Ankyrin-3-like	LOC103505993	69.06	3337.65	-1.6	1763	1793	T17:Phosphorylation (STY):22.09	T1779	TTTTIQTPGIENP	2552.1	948.947	2472.48	1991.18	5931.82	9483.53	9841.18	8418.84	0.236514	0.00895325
A0A3Q0J7Y7	A0A3Q0J7Y7|A0A3Q0J7Y7_DIACI	S	KLGDTSPLPVS(+79.97)PHK	11	14	Hamartin OS=Diaphorina citri OX=121845 GN=LOC103516367 PE=4 SV=1	Hamartin	LOC103516367	36.99	1554.78	0.4	187	200	S11:Phosphorylation (STY):30.64	S197	TSPLPVSPHKSKD	284.905	135.639	164.213	194.919	659.387	1193.95	620.043	824.459	0.23642	0.029881
A0A3Q0IRV1	A0A3Q0IRV1|A0A3Q0IRV1_DIACI	S	TSGNS(+79.97)EVDNSAIIESR	5	16	Uncharacterized protein LOC103506515 OS=Diaphorina citri OX=121845 GN=LOC103506515 PE=4 SV=1	Uncharacterized protein LOC103506515	LOC103506515	49.29	1757.75	0.7	105	120	S5:Phosphorylation (STY):11.12	S109	SKTSGNSEVDNSA	668.515	1565.28	823.589	1019.13	3579.82	4433.58	4959.79	4324.4	0.235669	0.00248165
A0A1S4E6C4	A0A1S4E6C4|A0A1S4E6C4_DIACI	S	AFAGTGHTLGS(+79.97)PVPTAIGQTK	11	21	NSFL1 cofactor p47-like OS=Diaphorina citri OX=121845 GN=LOC103505114 PE=4 SV=2	NSFL1 cofactor p47-like	LOC103505114	60.24	2090.02	2.9	151	171	S11:Phosphorylation (STY):11.12	S161	TGHTLGSPVPTAI	809.376	779.981	892.234	827.197	3896.79	3197.01	3615.17	3569.66	0.23173	0.000184193
A0A3Q0JDI6	A0A3Q0JDI6|A0A3Q0JDI6_DIACI	S	NEPPEDS(+79.97)NDLTNEQR	7	15	Uncharacterized protein LOC113471498 OS=Diaphorina citri OX=121845 GN=LOC113471498 PE=4 SV=1	Uncharacterized protein LOC113471498	LOC113471498	39.26	1836.72	3.7	118	132	S7:Phosphorylation (STY):8.26	S124	NEPPEDSNDLTNE	630.987	2419.24	1280.57	1443.6	7915.2	4514.35	6259.99	6229.85	0.231723	0.0126148
A0A3Q0JEE3	A0A3Q0JEE3|A0A3Q0JEE3_DIACI	S	LDDKEPLEKS(+79.97)PDVEK	10	15	Titin-like OS=Diaphorina citri OX=121845 GN=LOC113471684 PE=4 SV=1	Titin-like	LOC113471684	40.57	1820.84	1.2	353	367		S362	KEPLEKSPDVEKL	1097.18	1169.79	1498.56	1255.18	5428.37	5083.1	5798.78	5436.75	0.230869	6.44687e-05
A0A1S3DJ24	A0A1S3DJ24|A0A1S3DJ24_DIACI:A0A1S3DGE6|A0A1S3DGE6_DIACI	S	QIDNNS(+79.97)VYGTLR	6	12	Uncharacterized protein LOC103518694 OS=Diaphorina citri OX=121845 GN=LOC103518694 PE=4 SV=1	Uncharacterized protein LOC103518694	LOC103518694	36.08	1458.65	-0.6	174	185	S6:Phosphorylation (STY):22.85	S179	KQIDNNSVYGTLR	150.295	147.193	162.727	153.405	526.489	669.77	801.49	665.916	0.230367	0.00298676
A0A1S3D767	A0A1S3D767|A0A1S3D767_DIACI	S	LVGS(+79.97)SPSSS(+79.97)RPLSPGASMLTTK	4	22	Coiled-coil domain-containing protein 6 OS=Diaphorina citri OX=121845 GN=LOC103512855 PE=4 SV=1	Coiled-coil domain-containing protein 6	LOC103512855	29.67	2319.06	3	316	337	S4:Phosphorylation (STY):0.00;S9:Phosphorylation (STY):0.00	S319	SMRLVGSSPSSSR	1849.6	4073.85	7421.67	4448.37	13171.8	22989.1	22264.5	19475.1	0.228413	0.0133332
A0A1S3D767	A0A1S3D767|A0A1S3D767_DIACI	S	LVGS(+79.97)SPSSS(+79.97)RPLSPGASMLTTK	9	22	Coiled-coil domain-containing protein 6 OS=Diaphorina citri OX=121845 GN=LOC103512855 PE=4 SV=1	Coiled-coil domain-containing protein 6	LOC103512855	29.67	2319.06	3	316	337	S4:Phosphorylation (STY):0.00;S9:Phosphorylation (STY):0.00	S324	GSSPSSSRPLSPG	1849.6	4073.85	7421.67	4448.37	13171.8	22989.1	22264.5	19475.1	0.228413	0.0133332
A0A1S3DSN8	A0A1S3DSN8|A0A1S3DSN8_DIACI	T	VAT(+79.97)VKTKS(+79.97)GVYK	3	12	Uncharacterized protein LOC103524020 OS=Diaphorina citri OX=121845 GN=LOC103524020 PE=4 SV=1	Uncharacterized protein LOC103524020	LOC103524020	27.51	1439.68	-4.2	212	223	T3:Phosphorylation (STY):20.70;S8:Phosphorylation (STY):14.04	T214	GVVRVATVKTKSG	2499.83	412.446	1557.03	1489.77	6165.88	6627.79	7120.52	6638.06	0.224428	0.00148653
A0A1S3DSN8	A0A1S3DSN8|A0A1S3DSN8_DIACI	S	VAT(+79.97)VKTKS(+79.97)GVYK	8	12	Uncharacterized protein LOC103524020 OS=Diaphorina citri OX=121845 GN=LOC103524020 PE=4 SV=1	Uncharacterized protein LOC103524020	LOC103524020	27.51	1439.68	-4.2	212	223	T3:Phosphorylation (STY):20.70;S8:Phosphorylation (STY):14.04	S219	ATVKTKSGVYKRP	2499.83	412.446	1557.03	1489.77	6165.88	6627.79	7120.52	6638.06	0.224428	0.00148653
A0A3Q0J8B0	A0A3Q0J8B0|A0A3Q0J8B0_DIACI	S	T(+42.01)S(+79.97)IEVLKDEGK	2	11	Uncharacterized protein LOC113470461 OS=Diaphorina citri OX=121845 GN=LOC113470461 PE=4 SV=1	Uncharacterized protein LOC113470461	LOC113470461	34.54	1339.63	-2.5	2	12		S3	____MTSIEVLKD	282.106	1177.93	1165.33	875.121	3797.41	3610.01	4422.68	3943.37	0.221922	0.00134443
A0A3Q0JJD2	A0A3Q0JJD2|A0A3Q0JJD2_DIACI	S	KPS(+79.97)SVDPFES(+79.97)EEDPR	3	15	Uncharacterized protein LOC103520248 OS=Diaphorina citri OX=121845 GN=LOC103520248 PE=4 SV=1	Uncharacterized protein LOC103520248	LOC103520248	55.92	1877.71	2.5	394	408	S3:Phosphorylation (STY):0.00;S10:Phosphorylation (STY):56.47	S396	DDDRKPSSVDPFE	6090.98	3806.4	5462.44	5119.94	20602.5	25997.6	23029.5	23209.9	0.220593	0.00044398
A0A3Q0JJD2	A0A3Q0JJD2|A0A3Q0JJD2_DIACI	S	KPS(+79.97)SVDPFES(+79.97)EEDPR	10	15	Uncharacterized protein LOC103520248 OS=Diaphorina citri OX=121845 GN=LOC103520248 PE=4 SV=1	Uncharacterized protein LOC103520248	LOC103520248	55.92	1877.71	2.5	394	408	S3:Phosphorylation (STY):0.00;S10:Phosphorylation (STY):56.47	S403	SVDPFESEEDPRN	6090.98	3806.4	5462.44	5119.94	20602.5	25997.6	23029.5	23209.9	0.220593	0.00044398
A0A3Q0IWV0	A0A3Q0IWV0|A0A3Q0IWV0_DIACI	S	ENVIDNDVLIQNAINS(+79.97)R	16	17	Protein stoned-B OS=Diaphorina citri OX=121845 GN=LOC103511042 PE=3 SV=1	Protein stoned-B	LOC103511042	73.19	2005.95	2.4	349	365		S364	IQNAINSRKSSQD	3734.49	4402	5700.92	4612.47	19767.3	22702.6	20563.5	21011.1	0.219525	9.79658e-05
A0A3Q0ISV8	A0A3Q0ISV8|A0A3Q0ISV8_DIACI	Y	LASSY(+79.97)PGSSGNLLAGEELR	5	19	AMP deaminase OS=Diaphorina citri OX=121845 GN=LOC103509162 PE=3 SV=1	AMP deaminase	LOC103509162	68.1	1999.93	2.6	57	75	Y5:Phosphorylation (STY):0.00	Y61	PKLASSYPGSSGN	16573.4	31490.3	20207.1	22756.9	86077.7	106515	119996	104196	0.218404	0.00167665
A0A1S3D2M8	A0A1S3D2M8|A0A1S3D2M8_DIACI	S	RGS(+79.97)PNLPGIEK	3	11	Uncharacterized protein LOC103509313 OS=Diaphorina citri OX=121845 GN=LOC103509313 PE=4 SV=1	Uncharacterized protein LOC103509313	LOC103509313	45.48	1246.61	-1.4	21	31		S23	KNAKRGSPNLPGI	220.827	1096.01	1088.42	801.753	3047.4	3312.44	4668.89	3676.24	0.21809	0.00773468
A0A3Q0IRV1	A0A3Q0IRV1|A0A3Q0IRV1_DIACI	S	S(+79.97)SSSSIYYTSSSSVPMILPR	1	20	Uncharacterized protein LOC103506515 OS=Diaphorina citri OX=121845 GN=LOC103506515 PE=4 SV=1	Uncharacterized protein LOC103506515	LOC103506515	57.19	2228.01	6.6	734	753	S1:Phosphorylation (STY):0.00	S734	PTPALRSSSSSIY	531.499	676.406	1859.62	1022.51	4373.38	6234.09	3476.97	4694.81	0.217795	0.0159197
A0A1S3DCC9	A0A1S3DCC9|A0A1S3DCC9_DIACI	S	SC(+57.02)S(+79.97)SLPEQEELKPSK	3	15	Uncharacterized protein LOC103514956 OS=Diaphorina citri OX=121845 GN=LOC103514956 PE=4 SV=2	Uncharacterized protein LOC103514956	LOC103514956	62.49	1797.79	-1.4	94	108	C2:Carbamidomethylation:1000.00;S3:Phosphorylation (STY):0.00	S96	SGWKSCSSLPEQE	136.22	202.155	11549.1	3962.51	14336	16525.1	23729.4	18196.8	0.217758	0.0397542
A0A3Q0ITD4	A0A3Q0ITD4|A0A3Q0ITD4_DIACI	T	SGT(+79.97)PDFSSFTAAQLEESR	3	18	Intersectin-1 OS=Diaphorina citri OX=121845 GN=LOC103506839 PE=4 SV=1	Intersectin-1	LOC103506839	78.76	2008.84	4.3	849	866	T3:Phosphorylation (STY):18.53	T851	GGSRSGTPDFSSF	2242.02	30498.8	25156.4	19299.1	73746.5	94919.3	97263.3	88643	0.217717	0.00374909
A0A1S4EHK4	A0A1S4EHK4|A0A1S4EHK4_DIACI	S	LSSS(+79.97)PSSGLYSTS(+79.97)PK	4	15	UBA-like domain-containing protein 2 OS=Diaphorina citri OX=121845 GN=LOC103514398 PE=3 SV=1	UBA-like domain-containing protein 2	LOC103514398	60.82	1656.67	3.9	88	102	S4:Phosphorylation (STY):0.00;S13:Phosphorylation (STY):10.11	S91	KNKLSSSPSSGLY	8153.59	1092.85	8692.31	5979.59	26568.5	29743.1	26328.4	27546.7	0.217071	0.00130226
A0A1S4EHK4	A0A1S4EHK4|A0A1S4EHK4_DIACI	S	LSSS(+79.97)PSSGLYSTS(+79.97)PK	13	15	UBA-like domain-containing protein 2 OS=Diaphorina citri OX=121845 GN=LOC103514398 PE=3 SV=1	UBA-like domain-containing protein 2	LOC103514398	60.82	1656.67	3.9	88	102	S4:Phosphorylation (STY):0.00;S13:Phosphorylation (STY):10.11	S100	SGLYSTSPKQQHQ	8153.59	1092.85	8692.31	5979.59	26568.5	29743.1	26328.4	27546.7	0.217071	0.00130226
A0A1S3D082	A0A1S3D082|A0A1S3D082_DIACI	S	QC(+57.02)SES(+79.97)PTLDR	5	10	Uncharacterized protein LOC103508678 OS=Diaphorina citri OX=121845 GN=LOC103508678 PE=4 SV=1	Uncharacterized protein LOC103508678	LOC103508678	36.5	1271.49	-3.6	382	391	C2:Carbamidomethylation:1000.00;S5:Phosphorylation (STY):9.40	S386	DKQCSESPTLDRT	568.309	694.748	344.264	535.774	2565.37	1382.69	3458.88	2468.98	0.217002	0.0338753
A0A3Q0IRV1	A0A3Q0IRV1|A0A3Q0IRV1_DIACI	T	SSSSSIYYT(+79.97)SSSSVPMILPR	9	20	Uncharacterized protein LOC103506515 OS=Diaphorina citri OX=121845 GN=LOC103506515 PE=4 SV=1	Uncharacterized protein LOC103506515	LOC103506515	33.35	2228.01	7.2	734	753	T9:Phosphorylation (STY):0.00	T742	SSSIYYTSSSSVP	200.372	105.026	264.601	190	929.831	613.352	1083.66	875.614	0.21699	0.00933631
A0A1S3DN89	A0A1S3DN89|A0A1S3DN89_DIACI	S	KDNLVLS(+79.97)TSKSDLK	7	14	Myosin-13-like isoform X1 OS=Diaphorina citri OX=121845 GN=LOC103521605 PE=4 SV=2	Myosin-13-like isoform X1	LOC103521605	38.06	1626.82	0.2	220	233	S7:Phosphorylation (STY):0.00	S226	KDNLVLSTSKSDL	343.4	249.996	379.546	324.314	828.359	1468.28	2198.26	1498.3	0.216455	0.0418633
A0A3Q0ITU5	A0A3Q0ITU5|A0A3Q0ITU5_DIACI	S	TPAEKPSETEMVS(+79.97)SPLKS(+79.97)PADK	13	22	Muscle M-line assembly protein unc-89-like OS=Diaphorina citri OX=121845 GN=LOC113467622 PE=4 SV=1	Muscle M-line assembly protein unc-89-like	LOC113467622	37.9	2488.08	-0.6	347	368	S13:Phosphorylation (STY):0.00;S18:Phosphorylation (STY):19.86	S359	SETEMVSSPLKSP	3337.01	868.191	2263.77	2156.32	6810.56	15146	7988.08	9981.56	0.216031	0.0442342
A0A3Q0ITU5	A0A3Q0ITU5|A0A3Q0ITU5_DIACI	S	TPAEKPSETEMVS(+79.97)SPLKS(+79.97)PADK	18	22	Muscle M-line assembly protein unc-89-like OS=Diaphorina citri OX=121845 GN=LOC113467622 PE=4 SV=1	Muscle M-line assembly protein unc-89-like	LOC113467622	37.9	2488.08	-0.6	347	368	S13:Phosphorylation (STY):0.00;S18:Phosphorylation (STY):19.86	S364	VSSPLKSPADKSK	3337.01	868.191	2263.77	2156.32	6810.56	15146	7988.08	9981.56	0.216031	0.0442342
A0A1S3DAJ3	A0A1S3DAJ3|A0A1S3DAJ3_DIACI	S	HGS(+79.97)ALYPPMYFNEANTTSGEYK	3	22	Uncharacterized protein LOC103514595 isoform X1 OS=Diaphorina citri OX=121845 GN=LOC103514595 PE=4 SV=1	Uncharacterized protein LOC103514595 isoform X1	LOC103514595	79.04	2556.07	-6.6	112	133	S3:Phosphorylation (STY):5.77	S114	DQQRHGSALYPPM	1885.64	4985.91	3161.57	3344.37	11226.1	22184	13054.4	15488.2	0.215931	0.0257448
A0A3Q0JG04	A0A3Q0JG04|A0A3Q0JG04_DIACI	S	S(+79.97)PSVSSISHSR	1	11	Uncharacterized protein LOC103518349 OS=Diaphorina citri OX=121845 GN=LOC103518349 PE=4 SV=1	Uncharacterized protein LOC103518349	LOC103518349	60.53	1222.53	0	206	216	S1:Phosphorylation (STY):9.40	S206	PSTGSRSPSVSSI	409.214	109.395	690.944	403.184	1641.9	2464.3	1533.08	1879.76	0.214487	0.0120457
A0A3Q0JG04	A0A3Q0JG04|A0A3Q0JG04_DIACI	S	SPS(+79.97)VSSISHSR	3	11	Uncharacterized protein LOC103518349 OS=Diaphorina citri OX=121845 GN=LOC103518349 PE=4 SV=1	Uncharacterized protein LOC103518349	LOC103518349	55.27	1222.53	-1.3	206	216	S3:Phosphorylation (STY):0.00	S208	TGSRSPSVSSISH	409.214	109.395	690.944	403.184	1641.9	2464.3	1533.08	1879.76	0.214487	0.0120457
A0A3Q0IUB4	A0A3Q0IUB4|A0A3Q0IUB4_DIACI:A0A1S3D3X8|A0A1S3D3X8_DIACI	T	TTTST(+79.97)TTSAIILNTGYLK	5	18	Uncharacterized protein LOC113466771 OS=Diaphorina citri OX=121845 GN=LOC113466771 PE=4 SV=1	Uncharacterized protein LOC113466771	LOC113466771	59.62	1964.97	3.6	10	27	T5:Phosphorylation (STY):0.00	T14	TRTTTSTTTSAII	307.303	2276.16	3297.47	1960.31	11924.4	5947.86	9754.71	9208.99	0.212869	0.0206859
A0A3Q0IZK0	A0A3Q0IZK0|A0A3Q0IZK0_DIACI	S	S(+79.97)DNGAPITSYIIEK	1	14	LOW QUALITY PROTEIN: twitchin-like OS=Diaphorina citri OX=121845 GN=LOC103512392 PE=4 SV=1	LOW QUALITY PROTEIN: twitchin-like	LOC103512392	36.22	1586.72	2.5	3436	3449	S1:Phosphorylation (STY):8.82	S3436	KWTAPKSDNGAPI	589.012	340.203	220.531	383.249	1202.52	1857.58	2455.55	1838.55	0.208452	0.0182655
A0A1S3D331	A0A1S3D331|A0A1S3D331_DIACI	T	IT(+79.97)PS(+79.97)GSLLNR	2	10	Uncharacterized protein LOC103509555 OS=Diaphorina citri OX=121845 GN=LOC103509555 PE=4 SV=1	Uncharacterized protein LOC103509555	LOC103509555	30.46	1216.53	-4.6	149	158	T2:Phosphorylation (STY):42.68;S4:Phosphorylation (STY):14.04	T150	SSNIKITPSGSLL	96.6156	108.673	135.537	113.609	461.651	336.736	838.659	545.682	0.208196	0.046127
A0A1S3D331	A0A1S3D331|A0A1S3D331_DIACI	S	IT(+79.97)PS(+79.97)GSLLNR	4	10	Uncharacterized protein LOC103509555 OS=Diaphorina citri OX=121845 GN=LOC103509555 PE=4 SV=1	Uncharacterized protein LOC103509555	LOC103509555	30.46	1216.53	-4.6	149	158	T2:Phosphorylation (STY):42.68;S4:Phosphorylation (STY):14.04	S152	NIKITPSGSLLNR	96.6156	108.673	135.537	113.609	461.651	336.736	838.659	545.682	0.208196	0.046127
A0A3Q0J810	A0A3Q0J810|A0A3Q0J810_DIACI	S	EDS(+79.97)PQRDDKFELK	3	13	Uncharacterized protein LOC113469388 OS=Diaphorina citri OX=121845 GN=LOC113469388 PE=4 SV=1	Uncharacterized protein LOC113469388	LOC113469388	36.33	1685.73	2.4	45	57		S47	VTFREDSPQRDDK	736.813	1936.41	3743.82	2139.01	6047.91	10105.1	14674.7	10275.9	0.208158	0.0368801
A0A3Q0IZ37	A0A3Q0IZ37|A0A3Q0IZ37_DIACI	T	EAVVT(+79.97)PTDETNS(+79.97)ETAEK	5	17	Proteoglycan 4 OS=Diaphorina citri OX=121845 GN=LOC103512155 PE=4 SV=1	Proteoglycan 4	LOC103512155	63.18	1979.77	-1.4	546	562	T5:Phosphorylation (STY):32.28;S12:Phosphorylation (STY):0.00	T550	EKEAVVTPTDETN	840.745	376.265	14109.8	5108.94	22028.2	23100.1	28858.1	24662.1	0.207157	0.0171201
A0A3Q0IZ37	A0A3Q0IZ37|A0A3Q0IZ37_DIACI	S	EAVVT(+79.97)PTDETNS(+79.97)ETAEK	12	17	Proteoglycan 4 OS=Diaphorina citri OX=121845 GN=LOC103512155 PE=4 SV=1	Proteoglycan 4	LOC103512155	63.18	1979.77	-1.4	546	562	T5:Phosphorylation (STY):32.28;S12:Phosphorylation (STY):0.00	S557	PTDETNSETAEKE	840.745	376.265	14109.8	5108.94	22028.2	23100.1	28858.1	24662.1	0.207157	0.0171201
A0A3Q0JCK5	A0A3Q0JCK5|A0A3Q0JCK5_DIACI	S	LNQS(+79.97)SESPQWPSAGASDR	4	18	Uncharacterized protein LOC103516502 OS=Diaphorina citri OX=121845 GN=LOC103516502 PE=4 SV=1	Uncharacterized protein LOC103516502	LOC103516502	34.84	1995.83	0.1	42	59	S4:Phosphorylation (STY):0.00	S45	LLKLNQSSESPQW	75.7432	178.78	519.591	258.038	1383.03	1440.91	925.275	1249.74	0.206473	0.00933199
A0A3Q0JL68	A0A3Q0JL68|A0A3Q0JL68_DIACI	S	EASSAETQFTES(+79.97)GLEDFK	12	18	Uncharacterized protein LOC103520809 OS=Diaphorina citri OX=121845 GN=LOC103520809 PE=4 SV=1	Uncharacterized protein LOC103520809	LOC103520809	51.51	2054.84	1.1	21	38	S12:Phosphorylation (STY):36.05	S32	ETQFTESGLEDFK	974.356	818.222	297.802	696.793	2166.04	3247.39	4720.96	3378.13	0.206266	0.0251092
A0A1S3DR68	A0A1S3DR68|A0A1S3DR68_DIACI:A0A3Q0JGQ6|A0A3Q0JGQ6_DIACI:A0A1S3DSX7|A0A1S3DSX7_DIACI	S	AAVPSGAS(+79.97)TGIYEALELR	8	18	Alpha-enolase-like OS=Diaphorina citri OX=121845 GN=LOC103523285 PE=4 SV=2	Alpha-enolase-like	LOC103523285	65.22	1883.9	3	33	50	S8:Phosphorylation (STY):0.00	S40	AVPSGASTGIYEA	589.103	11625.4	3278.39	5164.3	18322.1	33764.6	23098.9	25061.9	0.206062	0.0243552
A0A1S4ENA8	A0A1S4ENA8|A0A1S4ENA8_DIACI	T	NYDDVFEDIT(+79.97)DDDC(+57.02)SEFGGK	10	20	Pre-mRNA-splicing factor cwc25-like isoform X1 OS=Diaphorina citri OX=121845 GN=LOC103519329 PE=4 SV=1	Pre-mRNA-splicing factor cwc25-like isoform X1	LOC103519329	66.44	2419.87	1.3	179	198	T10:Phosphorylation (STY):17.91;C14:Carbamidomethylation:1000.00	T188	DVFEDITDDDCSE	348.422	3250.84	132.745	1244	4424.52	4936.53	8841.51	6067.52	0.205026	0.048546
A0A1S3CTV5	A0A1S3CTV5|A0A1S3CTV5_DIACI	S	EDLEDKNEDS(+79.97)VEDTDAGIEK	10	20	Uncharacterized protein LOC103505149 isoform X3 OS=Diaphorina citri OX=121845 GN=LOC103505149 PE=4 SV=1	Uncharacterized protein LOC103505149 isoform X3	LOC103505149	32.39	2329.93	1.3	83	102	S10:Phosphorylation (STY):19.86	S92	EDKNEDSVEDTDA	545.848	754.431	89.431	463.237	1432.88	2428.53	2925.37	2262.26	0.204767	0.0200809
A0A1S3D2Q9	A0A1S3D2Q9|A0A1S3D2Q9_DIACI:A0A3Q0IV56|A0A3Q0IV56_DIACI	T	FSALYLANST(+79.97)ES(+79.97)LATAHER	10	19	Metal transporter CNNM4-like OS=Diaphorina citri OX=121845 GN=LOC103510268 PE=4 SV=1	Metal transporter CNNM4-like	LOC103510268	48.75	2239.96	0.8	163	181	T10:Phosphorylation (STY):0.00;S12:Phosphorylation (STY):4.52	T172	LYLANSTESLATA	1084.3	3849.22	2696.3	2543.27	7514.88	12860.4	17100.6	12492	0.203593	0.0261457
A0A1S3D2Q9	A0A1S3D2Q9|A0A1S3D2Q9_DIACI:A0A3Q0IV56|A0A3Q0IV56_DIACI	S	FSALYLANST(+79.97)ES(+79.97)LATAHER	12	19	Metal transporter CNNM4-like OS=Diaphorina citri OX=121845 GN=LOC103510268 PE=4 SV=1	Metal transporter CNNM4-like	LOC103510268	48.75	2239.96	0.8	163	181	T10:Phosphorylation (STY):0.00;S12:Phosphorylation (STY):4.52	S174	LANSTESLATAHE	1084.3	3849.22	2696.3	2543.27	7514.88	12860.4	17100.6	12492	0.203593	0.0261457
A0A1S3DR68	A0A1S3DR68|A0A1S3DR68_DIACI:A0A3Q0JGQ6|A0A3Q0JGQ6_DIACI:A0A1S3DSX7|A0A1S3DSX7_DIACI	T	AAVPSGAST(+79.97)GIYEALELR	9	18	Alpha-enolase-like OS=Diaphorina citri OX=121845 GN=LOC103523285 PE=4 SV=2	Alpha-enolase-like	LOC103523285	50.9	1883.9	2.1	33	50	T9:Phosphorylation (STY):9.34	T41	VPSGASTGIYEAL	325.114	11625.4	3278.39	5076.3	18322.1	33764.6	23098.9	25061.9	0.202551	0.0245091
A0A1S3D9R3	A0A1S3D9R3|A0A1S3D9R3_DIACI	S	AQVS(+79.97)SLVNLYTNR	4	13	Major antigen-like OS=Diaphorina citri OX=121845 GN=LOC103514257 PE=4 SV=1	Major antigen-like	LOC103514257	54.21	1543.74	0.1	354	366	S4:Phosphorylation (STY):0.00	S357	VLKAQVSSLVNLY	454.158	538.427	212.708	401.765	1619.75	1916.22	2422.54	1986.17	0.202281	0.00335972
A0A3Q0IPJ2	A0A3Q0IPJ2|A0A3Q0IPJ2_DIACI	T	VTGVPT(+79.97)PTVQWYR	6	13	LOW QUALITY PROTEIN: obscurin-like OS=Diaphorina citri OX=121845 GN=LOC103507575 PE=3 SV=1	LOW QUALITY PROTEIN: obscurin-like	LOC103507575	34.9	1582.75	-0.8	4335	4347	T6:Phosphorylation (STY):11.10	T4340	RVTGVPTPTVQWY	105.561	112.675	86.2311	101.489	474.075	717.976	335.759	509.27	0.199283	0.0219535
A0A3Q0ITT6	A0A3Q0ITT6|A0A3Q0ITT6_DIACI	S	ESAVSKS(+79.97)PVGSSIPSPTK	7	18	Uncharacterized protein LOC103509596 OS=Diaphorina citri OX=121845 GN=LOC103509596 PE=4 SV=1	Uncharacterized protein LOC103509596	LOC103509596	33.76	1836.89	4.3	414	431	S7:Phosphorylation (STY):13.67	S420	ESAVSKSPVGSSI	256.406	370.614	440.032	355.684	1334.3	2624.39	1403.14	1787.27	0.199009	0.0275579
A0A1S3DHY0	A0A3Q0II31|A0A3Q0II31_DIACI:A0A1S3DHY0|A0A1S3DHY0_DIACI	S	GSS(+79.97)TDDLSPLR	3	11	RING finger protein 11-like OS=Diaphorina citri OX=121845 GN=LOC103518952 PE=4 SV=1	RING finger protein 11-like	LOC103518952	39.98	1226.52	-4.4	7	17	S3:Phosphorylation (STY):0.00	S9	NCLKGSSTDDLSP	542.494	240.739	714.203	499.145	3274.7	1742.34	2545.96	2521	0.197995	0.0120563
A0A3Q0IRX6	A0A3Q0IRX6|A0A3Q0IRX6_DIACI	S	TFVTTSS(+79.97)VPGSQVYMVQETR	7	20	Paramyosin, long form OS=Diaphorina citri OX=121845 GN=LOC103508718 PE=4 SV=1	Paramyosin, long form	LOC103508718	69.07	2296.04	2.9	1326	1345	S7:Phosphorylation (STY):11.06	S1332	TFVTTSSVPGSQV	2229.04	1390.3	29936.7	11185.3	58650.4	73989.7	36966.6	56535.6	0.197846	0.0335169
A0A3Q0IRV1	A0A3Q0IRV1|A0A3Q0IRV1_DIACI	Y	HVEDIY(+79.97)AVSTKPVTR	6	15	Uncharacterized protein LOC103506515 OS=Diaphorina citri OX=121845 GN=LOC103506515 PE=4 SV=1	Uncharacterized protein LOC103506515	LOC103506515	64.22	1793.87	5.8	590	604	Y6:Phosphorylation (STY):56.34	Y595	RHVEDIYAVSTKP	1165.96	1723.79	2068.91	1652.89	9804.67	5674.75	9622.32	8367.25	0.197542	0.0080945
A0A3Q0JEE3	A0A3Q0JEE3|A0A3Q0JEE3_DIACI	T	T(+79.97)PEVEKPDDKAPLDK	1	15	Titin-like OS=Diaphorina citri OX=121845 GN=LOC113471684 PE=4 SV=1	Titin-like	LOC113471684	43.55	1760.82	3.3	437	451		T437	KVTATKTPEVEKP	520.553	954.596	897.889	791.013	3368.9	4253.66	4406.11	4009.56	0.197282	0.000784149
A0A1S4EGX5	A0A1S4EGX5|A0A1S4EGX5_DIACI:A0A3Q0J027|A0A3Q0J027_DIACI	S	QSS(+79.97)QQSVTSTAGQIGEDSEDTMK	3	23	Synapsin OS=Diaphorina citri OX=121845 GN=LOC103513662 PE=3 SV=1	Synapsin	LOC103513662	60.31	2493.02	-3.1	298	320	S3:Phosphorylation (STY):0.00	S300	NFGRQSSQQSVTS	1996.87	1253.46	4548.97	2599.76	10586.7	17945.1	11057.8	13196.5	0.197004	0.0147472
A0A3Q0IUB4	A0A3Q0IUB4|A0A3Q0IUB4_DIACI:A0A1S3D3X8|A0A1S3D3X8_DIACI	T	T(+79.97)TTSTTTS(+79.97)AIILNTGYLK	1	18	Uncharacterized protein LOC113466771 OS=Diaphorina citri OX=121845 GN=LOC113466771 PE=4 SV=1	Uncharacterized protein LOC113466771	LOC113466771	41.23	2044.94	-1.9	10	27	T1:Phosphorylation (STY):0.00;S8:Phosphorylation (STY):9.27	T10	TVTVTRTTTSTTT	456.948	353.88	234.335	348.388	2494.39	1787.79	1054.82	1779	0.195834	0.0272313
A0A3Q0IUB4	A0A3Q0IUB4|A0A3Q0IUB4_DIACI:A0A1S3D3X8|A0A1S3D3X8_DIACI	S	T(+79.97)TTSTTTS(+79.97)AIILNTGYLK	8	18	Uncharacterized protein LOC113466771 OS=Diaphorina citri OX=121845 GN=LOC113466771 PE=4 SV=1	Uncharacterized protein LOC113466771	LOC113466771	41.23	2044.94	-1.9	10	27	T1:Phosphorylation (STY):0.00;S8:Phosphorylation (STY):9.27	S17	TTSTTTSAIILNT	456.948	353.88	234.335	348.388	2494.39	1787.79	1054.82	1779	0.195834	0.0272313
A0A3Q0ITW8	A0A3Q0ITW8|A0A3Q0ITW8_DIACI	S	RLFNEDSNS(+79.97)GIENK	9	14	Uncharacterized protein LOC103507446 OS=Diaphorina citri OX=121845 GN=LOC103507446 PE=4 SV=1	Uncharacterized protein LOC103507446	LOC103507446	36.21	1701.74	1.9	173	186	S9:Phosphorylation (STY):9.40	S181	FNEDSNSGIENKM	914.558	16616.8	310.859	5947.4	22961.7	27362.7	41422.9	30582.4	0.194471	0.0330839
A0A3Q0IPV5	A0A3Q0IPV5|A0A3Q0IPV5_DIACI	S	QQNS(+79.97)IAQEPTVPLK	4	14	Uncharacterized protein LOC113466820 OS=Diaphorina citri OX=121845 GN=LOC113466820 PE=4 SV=1	Uncharacterized protein LOC113466820	LOC113466820	54.65	1631.79	2.5	57	70	S4:Phosphorylation (STY):42.99	S60	LKKQQNSIAQEPT	1183.92	185.085	267.263	545.424	2561.69	3924.32	1959.68	2815.23	0.19374	0.0267539
A0A3Q0ILN7	A0A3Q0ILN7|A0A3Q0ILN7_DIACI	S	AS(+79.97)DDTFNATGLPNDK	2	15	Uncharacterized protein LOC103506185 OS=Diaphorina citri OX=121845 GN=LOC103506185 PE=4 SV=1	Uncharacterized protein LOC103506185	LOC103506185	71.53	1644.67	1.2	97	111	S2:Phosphorylation (STY):41.20	S98	LYNGRASDDTFNA	1181.15	15112.9	16927.1	11073.7	46097.5	59988.4	65565.6	57217.2	0.193538	0.00377475
A0A1S3DNC6	A0A1S3DNC6|A0A1S3DNC6_DIACI	S	SKS(+79.97)PDC(+57.02)FVIC(+57.02)SNK	3	13	Uncharacterized protein LOC103521594 OS=Diaphorina citri OX=121845 GN=LOC103521594 PE=4 SV=1	Uncharacterized protein LOC103521594	LOC103521594	39.53	1620.67	0	179	191	S3:Phosphorylation (STY):0.00;C6:Carbamidomethylation:1000.00;C10:Carbamidomethylation:1000.00	S181	YADRSKSPDCFVI	1461.67	689.173	616.038	922.295	3032.21	4593.53	6721.04	4782.26	0.192857	0.0248885
A0A3Q0IM02	A0A3Q0IM02|A0A3Q0IM02_DIACI	S	T(+42.01)DS(+79.97)IEQFAESFQENVR	3	16	ubiquitinyl hydrolase 1 OS=Diaphorina citri OX=121845 GN=LOC103506463 PE=3 SV=1	ubiquitinyl hydrolase 1	LOC103506463	42.27	2020.84	7.7	2	17	T1:Acetylation (Protein N-term):1000.00;S3:Phosphorylation (STY):79.54	S4	___MTDSIEQFAE	183.64	1727.89	635.576	849.034	3907.67	3770.64	5565.35	4414.55	0.192326	0.00840188
A0A1S4EME3	A0A1S4EME3|A0A1S4EME3_DIACI	S	TLTTVQGLSS(+79.97)EYDLKK	10	16	Eukaryotic translation initiation factor eIF1 OS=Diaphorina citri OX=121845 GN=LOC108253598 PE=3 SV=1	Eukaryotic translation initiation factor eIF1	LOC108253598	39.53	1861.91	4.7	7	22	S10:Phosphorylation (STY):8.22	S16	TVQGLSSEYDLKK	207.621	266.731	55.783	176.712	1228.02	1070.84	464.467	921.106	0.191847	0.0366698
A0A1S3DE84	A0A1S3DE84|A0A1S3DE84_DIACI:A0A1S3DEM1|A0A1S3DEM1_DIACI	S	S(+79.97)SIHPNT(+79.97)PLFNR	1	12	Uncharacterized protein LOC103516882 isoform X2 OS=Diaphorina citri OX=121845 GN=LOC103516882 PE=4 SV=1	Uncharacterized protein LOC103516882 isoform X2	LOC103516882	36.38	1541.64	3.3	138	149	S1:Phosphorylation (STY):0.00;T7:Phosphorylation (STY):17.91	S138	GSSSNRSSIHPNT	205.716	98.0184	203.006	168.913	773.584	808.973	1064.77	882.442	0.191416	0.00191632
A0A1S3DE84	A0A1S3DE84|A0A1S3DE84_DIACI:A0A1S3DEM1|A0A1S3DEM1_DIACI	T	S(+79.97)SIHPNT(+79.97)PLFNR	7	12	Uncharacterized protein LOC103516882 isoform X2 OS=Diaphorina citri OX=121845 GN=LOC103516882 PE=4 SV=1	Uncharacterized protein LOC103516882 isoform X2	LOC103516882	36.38	1541.64	3.3	138	149	S1:Phosphorylation (STY):0.00;T7:Phosphorylation (STY):17.91	T144	SSIHPNTPLFNRT	205.716	98.0184	203.006	168.913	773.584	808.973	1064.77	882.442	0.191416	0.00191632
A0A3Q0ILW2	A0A3Q0ILW2|A0A3Q0ILW2_DIACI	S	S(+79.97)SNNMVVQQQTEVR	1	14	Glycogen debranching enzyme OS=Diaphorina citri OX=121845 GN=LOC103522335 PE=4 SV=1	Glycogen debranching enzyme	LOC103522335	56.21	1698.74	5.3	74	87	S1:Phosphorylation (STY):0.00	S74	VEIIQRSSNNMVV	1400.26	687.565	192.002	759.941	2670.84	5510.28	3756.82	3979.31	0.190973	0.0231005
A0A3Q0JH94	A0A3Q0JH94|A0A3Q0JH94_DIACI	S	FQPENTEEEMTAS(+79.97)K	13	14	Uncharacterized protein LOC113472304 isoform X1 OS=Diaphorina citri OX=121845 GN=LOC113472304 PE=4 SV=1	Uncharacterized protein LOC113472304 isoform X1	LOC113472304	24.4	1719.67	3.6	141	154	S13:Phosphorylation (STY):0.00	S153	EEEMTASKQKFAE	104.422	387.945	136.802	209.723	1080.84	649.883	1587.27	1106	0.189623	0.0348067
A0A3Q0J580	A0A3Q0J580|A0A3Q0J580_DIACI	S	MS(+79.97)GGATDDDEVVVAAFR	2	17	Myosin regulatory light chain 2 OS=Diaphorina citri OX=121845 GN=LOC103515034 PE=4 SV=1	Myosin regulatory light chain 2	LOC103515034	70.23	1818.75	0.7	54	70	S2:Phosphorylation (STY):33.65	S55	LFANRMSGGATDD	1357.91	3865.76	368.051	1863.91	9035.2	12083.9	8385.87	9834.98	0.189518	0.00668137
A0A1S3DU41	A0A1S3DU41|A0A1S3DU41_DIACI	S	SMLIASQAQPSS(+79.97)PR	12	14	Adhesive plaque matrix protein-like OS=Diaphorina citri OX=121845 GN=LOC103524757 PE=4 SV=1	Adhesive plaque matrix protein-like	LOC103524757	71.15	1551.71	2.2	582	595	S12:Phosphorylation (STY):0.00	S593	SQAQPSSPRHKSF	820.462	3070.29	582.295	1491.02	5100.28	7791.65	10744.2	7878.69	0.189247	0.0243502
A0A1S3DTX0	A0A1S3DTX0|A0A1S3DTX0_DIACI	S	LGILVPTS(+79.97)DSGESLPIPGK	8	19	Uncharacterized protein LOC103524587 OS=Diaphorina citri OX=121845 GN=LOC103524587 PE=4 SV=1	Uncharacterized protein LOC103524587	LOC103524587	58.47	1959	3.5	21	39	S8:Phosphorylation (STY):0.00	S28	GILVPTSDSGESL	392.537	4108.64	787.282	1762.82	8326.19	8066.13	11595.8	9329.37	0.188954	0.0098567
A0A1S3CUS4	A0A1S3CUS4|A0A1S3CUS4_DIACI	S	GES(+79.97)LPAGSLAVVAFDR	3	16	Interferon regulatory factor 2-binding protein-like B OS=Diaphorina citri OX=121845 GN=LOC103505582 PE=3 SV=1	Interferon regulatory factor 2-binding protein-like B	LOC103505582	78.04	1667.79	1.6	260	275	S3:Phosphorylation (STY):95.62	S262	PLTRGESLPAGSL	1169.45	2454.83	3070.04	2231.44	12956.1	14343.7	8446.34	11915.4	0.187274	0.00656435
A0A1S3DU41	A0A1S3DU41|A0A1S3DU41_DIACI	S	FNQDTSDVIPGLKPGS(+79.97)PPQILHASQFYSHQEPK	16	33	Adhesive plaque matrix protein-like OS=Diaphorina citri OX=121845 GN=LOC103524757 PE=4 SV=1	Adhesive plaque matrix protein-like	LOC103524757	88.7	3741.78	-2.9	511	543	S16:Phosphorylation (STY):10.87	S526	PGLKPGSPPQILH	839.368	52394.5	40976.7	31403.5	126627	213730	164479	168279	0.186616	0.00993007
A0A3Q0IPV5	A0A3Q0IPV5|A0A3Q0IPV5_DIACI	S	KQQNS(+79.97)IAQEPTVPLK	5	15	Uncharacterized protein LOC113466820 OS=Diaphorina citri OX=121845 GN=LOC113466820 PE=4 SV=1	Uncharacterized protein LOC113466820	LOC113466820	51.24	1759.89	-7.9	56	70	S5:Phosphorylation (STY):38.89	S60	LKKQQNSIAQEPT	1254.08	406.063	1260.94	973.694	5529.05	7525.52	2689.1	5247.89	0.18554	0.0405159
A0A1S3DU41	A0A1S3DU41|A0A1S3DU41_DIACI	S	SMLIASQAQPS(+79.97)SPR	11	14	Adhesive plaque matrix protein-like OS=Diaphorina citri OX=121845 GN=LOC103524757 PE=4 SV=1	Adhesive plaque matrix protein-like	LOC103524757	69.61	1551.71	9.7	582	595	S11:Phosphorylation (STY):0.00	S592	ASQAQPSSPRHKS	732.6	3070.29	582.295	1461.73	5100.28	7791.65	10744.2	7878.69	0.185529	0.0242371
A0A1S3DI25	A0A1S3DI25|A0A1S3DI25_DIACI	S	LANSLS(+79.97)DQILPLR	6	13	Synaptonemal complex protein 1-like OS=Diaphorina citri OX=121845 GN=LOC103519091 PE=4 SV=1	Synaptonemal complex protein 1-like	LOC103519091	57.87	1518.78	-2.3	196	208	S6:Phosphorylation (STY):26.31	S201	RLANSLSDQILPL	989.559	88.5141	764.95	614.341	3447.85	2809.42	3813.44	3356.9	0.183008	0.00235239
A0A3Q0JPY8	A0A3Q0JPY8|A0A3Q0JPY8_DIACI	S	RS(+79.97)SGGPDLILPSSPSSPHSIIPR	2	23	Uncharacterized protein LOC103524423 OS=Diaphorina citri OX=121845 GN=LOC103524423 PE=4 SV=1	Uncharacterized protein LOC103524423	LOC103524423	50.16	2436.22	-4.5	643	665	S2:Phosphorylation (STY):0.00	S644	KLLKRRSSGGPDL	992.692	779.119	287.507	686.44	3163.43	5206.78	2949.77	3773.33	0.181919	0.0146003
A0A3Q0IYQ3	A0A3Q0IYQ3|A0A3Q0IYQ3_DIACI	S	S(+79.97)SSQNSSFDPHSLR	1	14	Liprin-alpha-1-like OS=Diaphorina citri OX=121845 GN=LOC103512090 PE=4 SV=1	Liprin-alpha-1-like	LOC103512090	30.46	1627.66	-2.2	165	178	S1:Phosphorylation (STY):0.00	S165	PSGFHRSSSQNSS	230.602	240.967	155.613	209.061	798.481	1640.34	1013.5	1150.77	0.18167	0.0206875
A0A3Q0J580	A0A3Q0J580|A0A3Q0J580_DIACI	S	M(+15.99)S(+79.97)GGATDDDEVVVAAFR	2	17	Myosin regulatory light chain 2 OS=Diaphorina citri OX=121845 GN=LOC103515034 PE=4 SV=1	Myosin regulatory light chain 2	LOC103515034	64.51	1834.74	1	54	70	M1:Oxidation (M):1000.00;S2:Phosphorylation (STY):8.87	S55	LFANRMSGGATDD	1072.33	683.409	33.6917	596.475	3316.7	3615.85	2918.91	3283.82	0.181641	0.0017954
A0A1S4EEH3	A0A1S4EEH3|A0A1S4EEH3_DIACI	S	C(+57.02)LLPS(+79.97)NVAPAAQNC(+57.02)YK	5	16	Triosephosphate isomerase OS=Diaphorina citri OX=121845 GN=LOC103511512 PE=3 SV=1	Triosephosphate isomerase	LOC103511512	27.18	1884.83	-0.6	52	67	C1:Carbamidomethylation:1000.00;S5:Phosphorylation (STY):25.74;C14:Carbamidomethylation:1000.00	S56	AKCLLPSNVAPAA	84.1424	61.0953	95.8215	80.3531	534.884	352.597	453.919	447.133	0.179707	0.00240457
A0A3Q0IRS2	A0A3Q0IRS2|A0A3Q0IRS2_DIACI	S	MALTSAQTGAS(+79.97)TSNLLGGAQESNK	11	24	Calcium/calmodulin-dependent protein kinase type 1-like OS=Diaphorina citri OX=121845 GN=LOC103508598 PE=4 SV=1	Calcium/calmodulin-dependent protein kinase type 1-like	LOC103508598	62.76	2416.09	1.6	138	161	S11:Phosphorylation (STY):17.01	S148	SAQTGASTSNLLG	8498.74	2926.62	5406.61	5610.66	16938.1	37705.4	39063.6	31235.7	0.179623	0.0250828
A0A3Q0IM99	A0A3Q0IM99|A0A3Q0IM99_DIACI	S	TS(+79.97)SELSIDKENNSIIK	2	16	Probable serine/threonine-protein kinase DDB_G0282963 OS=Diaphorina citri OX=121845 GN=LOC103506496 PE=4 SV=1	Probable serine/threonine-protein kinase DDB_G0282963	LOC103506496	41.95	1856.88	1.2	1168	1183	S2:Phosphorylation (STY):0.00	S1169	SNLRRTSSELSID	1387.98	433.661	53.3199	624.986	3965.26	3864.82	2685.67	3505.25	0.1783	0.00727309
A0A1S4E874	A0A1S4E874|A0A1S4E874_DIACI:A0A1S4E858|A0A1S4E858_DIACI	S	ILEDLGS(+79.97)SPIHDNYPQAR	7	18	Myb-like protein P isoform X1 OS=Diaphorina citri OX=121845 GN=LOC103506482 PE=4 SV=1	Myb-like protein P isoform X1	LOC103506482	27.52	2103.96	-0.2	809	826	S7:Phosphorylation (STY):0.00	S815	ILEDLGSSPIHDN	219.627	285.263	336.121	280.337	1257.11	2129.02	1331.77	1572.63	0.17826	0.0100462
A0A3Q0J6K3	A0A3Q0J6K3|A0A3Q0J6K3_DIACI	S	SSS(+79.97)LPVGALPPTSLAR	3	16	Uncharacterized protein LOC103515666 OS=Diaphorina citri OX=121845 GN=LOC103515666 PE=4 SV=1	Uncharacterized protein LOC103515666	LOC103515666	59.93	1631.83	-0.9	48	63	S3:Phosphorylation (STY):0.00	S50	LQAKSSSLPVGAL	437.963	1037.38	596.075	690.471	3194.05	5665.44	2769.06	3876.18	0.178132	0.0258103
A0A1S3D251	A0A1S3D251|A0A1S3D251_DIACI:A0A1S3DLU6|A0A1S3DLU6_DIACI	S	S(+79.97)VLLENENVQAISASR	1	16	Uncharacterized protein LOC103509854 OS=Diaphorina citri OX=121845 GN=LOC103509854 PE=4 SV=1	Uncharacterized protein LOC103509854	LOC103509854	67	1808.87	2.3	326	341	S1:Phosphorylation (STY):167.97	S326	RDSVTRSVLLENE	455.894	192.502	153.322	267.239	1880.53	1156.74	1499.87	1512.38	0.176701	0.00560645
A0A3Q0J207	A0A3Q0J207|A0A3Q0J207_DIACI	S	SSS(+79.97)AEAEVPVFPNKK	3	15	LOW QUALITY PROTEIN: uncharacterized protein LOC103513744 OS=Diaphorina citri OX=121845 GN=LOC103513744 PE=4 SV=1	LOW QUALITY PROTEIN: uncharacterized protein LOC103513744	LOC103513744	51.46	1668.78	4.2	1109	1123	S3:Phosphorylation (STY):0.00	S1111	TPIKSSSAEAEVP	108.289	322.991	68.1445	166.475	1355.42	615.915	867.57	946.303	0.175921	0.0279078
A0A1S3D7M4	A0A1S3D7M4|A0A1S3D7M4_DIACI	S	NLEPTLTTQS(+79.97)SHPVLQK	10	17	Uncharacterized protein LOC103513107 OS=Diaphorina citri OX=121845 GN=LOC103513107 PE=4 SV=1	Uncharacterized protein LOC103513107	LOC103513107	49.07	1971.97	0.7	1124	1140	S10:Phosphorylation (STY):0.00	S1133	PTLTTQSSHPVLQ	2819.85	1219.46	1577.4	1872.24	8735.29	9372.85	14034.2	10714.1	0.174745	0.00706145
A0A1S4EID2	A0A1S4EID2|A0A1S4EID2_DIACI	S	ATS(+79.97)NVFAMFDQAQIQNFK	3	18	Myosin regulatory light chain sqh OS=Diaphorina citri OX=121845 GN=LOC103515046 PE=4 SV=1	Myosin regulatory light chain sqh	LOC103515046	76.04	2138.95	2.7	20	37	S3:Phosphorylation (STY):0.00	S22	RAQRATSNVFAMF	69.4483	17162.3	8209.24	8480.34	42170.9	66556.3	37031.1	48586.1	0.174542	0.0179665
A0A1S3CVJ4	A0A1S3CVJ4|A0A1S3CVJ4_DIACI	S	NS(+79.97)PLS(+79.97)QTPPQNVLSIPNILVK	2	21	Eukaryotic translation initiation factor 4E-binding protein 1 OS=Diaphorina citri OX=121845 GN=LOC103506044 PE=3 SV=1	Eukaryotic translation initiation factor 4E-binding protein 1	LOC103506044	59.17	2418.2	1.3	56	76	S2:Phosphorylation (STY):23.70;S5:Phosphorylation (STY):0.00	S57	LLHLRNSPLSQTP	3381.22	414.397	8914.91	4236.84	23496.6	34906.4	14721.2	24374.7	0.173821	0.0338512
A0A1S3CVJ4	A0A1S3CVJ4|A0A1S3CVJ4_DIACI	S	NS(+79.97)PLS(+79.97)QTPPQNVLSIPNILVK	5	21	Eukaryotic translation initiation factor 4E-binding protein 1 OS=Diaphorina citri OX=121845 GN=LOC103506044 PE=3 SV=1	Eukaryotic translation initiation factor 4E-binding protein 1	LOC103506044	59.17	2418.2	1.3	56	76	S2:Phosphorylation (STY):23.70;S5:Phosphorylation (STY):0.00	S60	LRNSPLSQTPPQN	3381.22	414.397	8914.91	4236.84	23496.6	34906.4	14721.2	24374.7	0.173821	0.0338512
A0A3Q0JH02	A0A3Q0JH02|A0A3Q0JH02_DIACI	T	EFLQDT(+79.97)EES(+79.97)SKELHEVPSLPLELVNNK	6	27	Hyphal wall protein 1-like OS=Diaphorina citri OX=121845 GN=LOC103518897 PE=4 SV=1	Hyphal wall protein 1-like	LOC103518897	80.71	3283.49	4.1	186	212	T6:Phosphorylation (STY):16.51;S9:Phosphorylation (STY):0.00	T191	KEFLQDTEESSKE	32405.9	72972.6	94768.2	66715.5	250302	357224	546813	384780	0.173386	0.0229655
A0A3Q0JH02	A0A3Q0JH02|A0A3Q0JH02_DIACI	S	EFLQDT(+79.97)EES(+79.97)SKELHEVPSLPLELVNNK	9	27	Hyphal wall protein 1-like OS=Diaphorina citri OX=121845 GN=LOC103518897 PE=4 SV=1	Hyphal wall protein 1-like	LOC103518897	80.71	3283.49	4.1	186	212	T6:Phosphorylation (STY):16.51;S9:Phosphorylation (STY):0.00	S194	LQDTEESSKELHE	32405.9	72972.6	94768.2	66715.5	250302	357224	546813	384780	0.173386	0.0229655
A0A1S4EKC4	A0A1S4EKC4|A0A1S4EKC4_DIACI	T	VISNASC(+57.02)T(+79.97)TNC(+57.02)LAPLAK	8	17	Glyceraldehyde-3-phosphate dehydrogenase OS=Diaphorina citri OX=121845 GN=LOC103516640 PE=3 SV=1	Glyceraldehyde-3-phosphate dehydrogenase	LOC103516640	63.9	1898.86	2.3	143	159	C7:Carbamidomethylation:1000.00;T8:Phosphorylation (STY):14.02;C11:Carbamidomethylation:1000.00	T150	ISNASCTTNCLAP	3523.8	2979.57	575.693	2359.69	7725.62	20932.9	12663.3	13773.9	0.171315	0.0448351
A0A1S3DRQ9	A0A1S3DRQ9|A0A1S3DRQ9_DIACI:A0A3Q0JKB5|A0A3Q0JKB5_DIACI:Q0PXX4|Q0PXX4_DIACI	S	KVGASVS(+79.97)PVLELEK	7	14	Fatty acid-binding protein, muscle isoform X2 OS=Diaphorina citri OX=121845 GN=LOC103523162 PE=3 SV=1	Fatty acid-binding protein, muscle isoform X2	LOC103523162	44.72	1534.8	1	33	46	S7:Phosphorylation (STY):28.86	S39	KVGASVSPVLELE	628.691	1051.62	246.426	642.247	2545.24	5003.71	3752.48	3767.15	0.170486	0.013873
A0A3Q0IPN2	A0A3Q0IPN2|A0A3Q0IPN2_DIACI	T	SSSSELT(+79.97)TTVSHTVQSQSSTSNQQSSSYSSSSIPR	7	35	Uncharacterized protein LOC103507566 OS=Diaphorina citri OX=121845 GN=LOC103507566 PE=4 SV=1	Uncharacterized protein LOC103507566	LOC103507566	30.39	3728.63	4.5	263	297	T7:Phosphorylation (STY):0.00	T269	SSSSELTTTVSHT	239.703	1232.59	124.498	532.265	1759.68	3582.19	4063.75	3135.21	0.16977	0.0294807
A0A3Q0JHJ4	A0A3Q0JHJ4|A0A3Q0JHJ4_DIACI	T	LLKPSSDPPLKPT(+79.97)GSK	13	16	Uncharacterized protein LOC113472362 OS=Diaphorina citri OX=121845 GN=LOC113472362 PE=4 SV=1	Uncharacterized protein LOC113472362	LOC113472362	34.54	1743.92	1.9	449	464	T13:Phosphorylation (STY):0.00	T461	DPPLKPTGSKTYE	533.376	86.3147	244.572	288.087	1238.62	2246.46	1628	1704.36	0.16903	0.0116187
A0A1S3D0V0	A0A1S3D0V0|A0A1S3D0V0_DIACI	S	S(+79.97)QVWHPC(+57.02)LC(+57.02)IVEQK	1	14	Receptor expression-enhancing protein 6-like OS=Diaphorina citri OX=121845 GN=LOC103509090 PE=4 SV=1	Receptor expression-enhancing protein 6-like	LOC103509090	30.24	1862.82	6.4	21	34	C7:Carbamidomethylation:1000.00;C9:Carbamidomethylation:1000.00	S21	NILNDKSQVWHPC	64.2466	469.816	300.624	278.229	1187.07	1908.12	1854.82	1650	0.168623	0.00619426
A0A3Q0IM99	A0A3Q0IM99|A0A3Q0IM99_DIACI	S	SATLPSSFPS(+79.97)PPVHR	10	15	Probable serine/threonine-protein kinase DDB_G0282963 OS=Diaphorina citri OX=121845 GN=LOC103506496 PE=4 SV=1	Probable serine/threonine-protein kinase DDB_G0282963	LOC103506496	67.92	1658.78	0.5	586	600	S10:Phosphorylation (STY):48.12	S595	LPSSFPSPPVHRR	9854.4	4386.85	1634.02	5291.76	27689.5	33965.6	34161.9	31939	0.165683	0.00116053
A0A1S4EGX5	A0A1S4EGX5|A0A1S4EGX5_DIACI:A0A3Q0J027|A0A3Q0J027_DIACI	S	QSSQQS(+79.97)VTSTAGQIGEDSEDTMK	6	23	Synapsin OS=Diaphorina citri OX=121845 GN=LOC103513662 PE=3 SV=1	Synapsin	LOC103513662	43.9	2493.02	0.8	298	320	S6:Phosphorylation (STY):0.00	S303	RQSSQQSVTSTAG	697.569	4459.88	989.228	2048.89	7509.11	12132.6	17477.2	12373	0.165594	0.0297798
A0A1S3DAJ3	A0A1S3DAJ3|A0A1S3DAJ3_DIACI	S	HGS(+79.97)ALYPPMYFNEANTTSGEYKK	3	23	Uncharacterized protein LOC103514595 isoform X1 OS=Diaphorina citri OX=121845 GN=LOC103514595 PE=4 SV=1	Uncharacterized protein LOC103514595 isoform X1	LOC103514595	54.88	2684.16	-5.2	112	134	S3:Phosphorylation (STY):56.34	S114	DQQRHGSALYPPM	740.976	747.944	840.516	776.479	3583.07	3094.07	7428.19	4701.78	0.165146	0.0457741
A0A1S3DH23	A0A1S3DH23|A0A1S3DH23_DIACI	S	FNIDFNKDELLS(+79.97)R	12	13	Uncharacterized protein LOC103518240 OS=Diaphorina citri OX=121845 GN=LOC103518240 PE=4 SV=1	Uncharacterized protein LOC103518240	LOC103518240	50.97	1689.78	3.2	636	648		S647	NKDELLSRIFELT	199.304	540.144	2093.87	944.44	4883.43	6851.32	5437.16	5723.97	0.164997	0.0044442
A0A1S3DTD7	A0A1S3DTD7|A0A1S3DTD7_DIACI:A0A1S3D123|A0A1S3D123_DIACI	S	AS(+79.97)LHTFGPASGR	2	12	Uncharacterized protein LOC103522568 OS=Diaphorina citri OX=121845 GN=LOC103523952 PE=4 SV=1	Uncharacterized protein LOC103522568	LOC103523952	62.41	1279.57	1.4	19	30	S2:Phosphorylation (STY):28.36	S20	FGGQKASLHTFGP	134.565	711.452	1983.29	943.102	4637.31	3724.91	8867.07	5743.1	0.164215	0.0457093
A0A3Q0J807	A0A3Q0J807|A0A3Q0J807_DIACI	S	HMVNS(+79.97)PPTVTQR	5	12	Probable serine/threonine-protein kinase MARK-A OS=Diaphorina citri OX=121845 GN=LOC103516748 PE=4 SV=1	Probable serine/threonine-protein kinase MARK-A	LOC103516748	53.86	1445.65	-1.4	448	459	S5:Phosphorylation (STY):15.43	S452	IRHMVNSPPTVTQ	323.037	270.135	686.813	426.662	1939.89	3965.06	1927.47	2610.81	0.163421	0.0339597
A0A3Q0ITU5	A0A3Q0ITU5|A0A3Q0ITU5_DIACI	S	LSSPPKS(+79.97)PTIK	7	11	Muscle M-line assembly protein unc-89-like OS=Diaphorina citri OX=121845 GN=LOC113467622 PE=4 SV=1	Muscle M-line assembly protein unc-89-like	LOC113467622	52.43	1233.64	2.9	230	240	S7:Phosphorylation (STY):22.85	S236	LSSPPKSPTIKSK	935.149	782.09	868.227	861.822	5651.88	7177.79	3413.93	5414.53	0.159168	0.0141229
A0A1S3DEL2	A0A1S3DEL2|A0A1S3DEL2_DIACI	T	TYC(+57.02)VDSQVADSAC(+57.02)TST(+79.97)AYTNGVK	16	23	alkaline phosphatase OS=Diaphorina citri OX=121845 GN=LOC103516265 PE=3 SV=1	alkaline phosphatase	LOC103516265	52.79	2577.04	-0.2	141	163	C3:Carbamidomethylation:1000.00;C13:Carbamidomethylation:1000.00;T16:Phosphorylation (STY):9.40	T156	DSACTSTAYTNGV	5011.97	8316.82	8842.96	7390.58	36420.6	50063.3	53061.2	46515	0.158886	0.0017438
A0A1S4EJ75	A0A1S4EJ75|A0A1S4EJ75_DIACI	S	FPAKDS(+79.97)MEILIK	6	12	Uncharacterized protein LOC103515649 OS=Diaphorina citri OX=121845 GN=LOC103515649 PE=4 SV=1	Uncharacterized protein LOC103515649	LOC103515649	57.16	1470.72	0.2	164	175		S169	KFPAKDSMEILIK	886.37	5345.32	1605.73	2612.47	7982.6	21336.6	21104.1	16807.8	0.155432	0.0373071
A0A1S3DTX0	A0A1S3DTX0|A0A1S3DTX0_DIACI	S	LGILVPTSDS(+79.97)GESLPIPGK	10	19	Uncharacterized protein LOC103524587 OS=Diaphorina citri OX=121845 GN=LOC103524587 PE=4 SV=1	Uncharacterized protein LOC103524587	LOC103524587	56.5	1959	1.1	21	39	S10:Phosphorylation (STY):12.81	S30	LVPTSDSGESLPI	392.537	545.811	3404.65	1447.67	8326.19	8066.13	11595.8	9329.37	0.155173	0.00627412
A0A1S3D2Q9	A0A1S3D2Q9|A0A1S3D2Q9_DIACI:A0A3Q0IV56|A0A3Q0IV56_DIACI	S	GEGASVSFPSS(+79.97)PMLPR	11	16	Metal transporter CNNM4-like OS=Diaphorina citri OX=121845 GN=LOC103510268 PE=4 SV=1	Metal transporter CNNM4-like	LOC103510268	57.68	1697.75	3	144	159	S11:Phosphorylation (STY):0.00	S154	SVSFPSSPMLPRD	1008.75	508.348	654.053	723.716	4371.62	5765.19	3985.67	4707.49	0.153737	0.00207044
A0A3Q0J9Z0	A0A3Q0J9Z0|A0A3Q0J9Z0_DIACI	S	VKS(+79.97)PLVVIPNYSNQSR	3	16	DNA helicase OS=Diaphorina citri OX=121845 GN=LOC103517312 PE=4 SV=1	DNA helicase	LOC103517312	45.41	1879.96	5.4	177	192	S3:Phosphorylation (STY):36.20	S179	PPPRVKSPLVVIP	1078.37	287.885	356.529	574.262	3156.78	5052.68	3019.8	3743.09	0.153419	0.0107614
A0A1S4EID2	A0A1S4EID2|A0A1S4EID2_DIACI	S	ATS(+79.97)NVFAM(+15.99)FDQAQIQNFK	3	18	Myosin regulatory light chain sqh OS=Diaphorina citri OX=121845 GN=LOC103515046 PE=4 SV=1	Myosin regulatory light chain sqh	LOC103515046	64.49	2154.94	1.5	20	37	S3:Phosphorylation (STY):0.00;M8:Oxidation (M):1000.00	S22	RAQRATSNVFAMF	617.603	5415.39	2264.75	2765.92	19858.3	19634.2	14875.5	18122.7	0.152622	0.0020312
A0A3Q0J580	A0A3Q0J580|A0A3Q0J580_DIACI	T	MSGGAT(+79.97)DDDEVVVAAFR	6	17	Myosin regulatory light chain 2 OS=Diaphorina citri OX=121845 GN=LOC103515034 PE=4 SV=1	Myosin regulatory light chain 2	LOC103515034	65.49	1818.75	1.5	54	70	T6:Phosphorylation (STY):19.86	T59	RMSGGATDDDEVV	1529.6	892.167	368.051	929.938	6222.35	8398.07	3687.12	6102.51	0.152386	0.0210328
A0A1S3DU41	A0A1S3DU41|A0A1S3DU41_DIACI	S	SEPSQNVVTPPWVKPSPPSTPS(+79.97)HSTINK	22	28	Adhesive plaque matrix protein-like OS=Diaphorina citri OX=121845 GN=LOC103524757 PE=4 SV=1	Adhesive plaque matrix protein-like	LOC103524757	25.25	3077.49	1.6	224	251	S22:Phosphorylation (STY):0.00	S245	SPPSTPSHSTINK	24167.3	175.309	68558.8	30967.1	161015	211009	237703	203242	0.152366	0.00461631
A0A1S3CTU9	A0A1S3CTU9|A0A1S3CTU9_DIACI	S	RRS(+79.97)DDLMASTMSLPYHHEVK	3	20	Uncharacterized protein LOC103505042 OS=Diaphorina citri OX=121845 GN=LOC103505042 PE=4 SV=1	Uncharacterized protein LOC103505042	LOC103505042	34.05	2452.1	0.9	130	149	S3:Phosphorylation (STY):13.30	S132	PQERRRSDDLMAS		563.145	44.3348	303.74	1435.11	2300.35	2251.72	1995.73	0.152195	0.0259183
A0A1S4EJ75	A0A1S4EJ75|A0A1S4EJ75_DIACI	S	DTITSS(+79.97)DDEEIAIIDQDFDK	6	20	Uncharacterized protein LOC103515649 OS=Diaphorina citri OX=121845 GN=LOC103515649 PE=4 SV=1	Uncharacterized protein LOC103515649	LOC103515649	71.96	2348.98	0.2	209	228	S6:Phosphorylation (STY):11.06	S214	KDTITSSDDEEIA	479.572	367.302	2342.16	1063.01	8240.97	6148.87	6608.45	6999.43	0.151871	0.00275605
A0A3Q0IL42	A0A3Q0IL42|A0A3Q0IL42_DIACI	S	S(+79.97)ELFEGVTQGLLANVK	1	16	Ankyrin-3-like OS=Diaphorina citri OX=121845 GN=LOC103505993 PE=4 SV=1	Ankyrin-3-like	LOC103505993	69.88	1783.88	-2.9	2154	2169	S1:Phosphorylation (STY):61.82	S2154	LEERRKSELFEGV	199.108	466.663	267.17	310.98	1948.87	2767.52	1458.73	2058.38	0.15108	0.0109964
A0A3Q0ISV8	A0A3Q0ISV8|A0A3Q0ISV8_DIACI	S	LASSYPGS(+79.97)SGNLLAGEELR	8	19	AMP deaminase OS=Diaphorina citri OX=121845 GN=LOC103509162 PE=3 SV=1	AMP deaminase	LOC103509162	66.55	1999.93	3.3	57	75	S8:Phosphorylation (STY):8.14	S64	ASSYPGSSGNLLA	11971	31490.3	5065.87	16175.7	94709.3	106515	119996	107074	0.151071	0.00107905
A0A1S3D7M4	A0A1S3D7M4|A0A1S3D7M4_DIACI	S	NLEPTLTTQSS(+79.97)HPVLQK	11	17	Uncharacterized protein LOC103513107 OS=Diaphorina citri OX=121845 GN=LOC103513107 PE=4 SV=1	Uncharacterized protein LOC103513107	LOC103513107	59.59	1971.97	3.1	1124	1140	S11:Phosphorylation (STY):8.14	S1134	TLTTQSSHPVLQK	2571.69	687.299	1474.91	1577.97	8735.29	9372.85	14034.2	10714.1	0.147279	0.00652105
A0A1S4EID2	A0A1S4EID2|A0A1S4EID2_DIACI	T	AT(+79.97)SNVFAM(+15.99)FDQAQIQNFK	2	18	Myosin regulatory light chain sqh OS=Diaphorina citri OX=121845 GN=LOC103515046 PE=4 SV=1	Myosin regulatory light chain sqh	LOC103515046	63.97	2154.94	1.7	20	37	T2:Phosphorylation (STY):0.00;M8:Oxidation (M):1000.00	T21	KRAQRATSNVFAM	264.003	5415.39	2264.75	2648.05	19858.3	19634.2	14875.5	18122.7	0.146118	0.0021932
A0A3Q0IQQ4	A0A3Q0IQQ4|A0A3Q0IQQ4_DIACI	S	S(+79.97)VDHGFASPFDLDSLR	1	16	Uncharacterized protein LOC103508071 OS=Diaphorina citri OX=121845 GN=LOC103508071 PE=4 SV=1	Uncharacterized protein LOC103508071	LOC103508071	45.07	1841.8	1.2	191	206	S1:Phosphorylation (STY):38.64	S191	FRNKSRSVDHGFA	709.034	175.187	91.6793	325.3	2447.31	2889.06	1351.94	2229.44	0.145911	0.0184927
A0A1S3DGB8	A0A1S3DGB8|A0A1S3DGB8_DIACI:A0A1S3DG36|A0A1S3DG36_DIACI	S	AQAVAS(+79.97)PFELSSEHDLNYVIK	6	21	PDZ and LIM domain protein 3 isoform X2 OS=Diaphorina citri OX=121845 GN=LOC103517780 PE=4 SV=1	PDZ and LIM domain protein 3 isoform X2	LOC103517780	60.71	2397.13	1.2	146	166	S6:Phosphorylation (STY):28.79	S151	RAQAVASPFELSS	717.729	8515.49	9769.53	6334.25	44150.4	52849.4	35496.5	44165.4	0.143421	0.00277025
A0A3Q0IPV4	A0A3Q0IPV4|A0A3Q0IPV4_DIACI	S	TSS(+79.97)GSSAQTLQVTPLPK	3	17	Small G protein signaling modulator 2 OS=Diaphorina citri OX=121845 GN=LOC103505206 PE=3 SV=1	Small G protein signaling modulator 2	LOC103505206	61.51	1780.86	1.4	138	154	S3:Phosphorylation (STY):0.00	S140	LLKKTSSGSSAQT	141.023	242.408	160.363	181.265	684.526	1247.4	1887.12	1273.01	0.14239	0.0351791
A0A3Q0JBE5	A0A3Q0JBE5|A0A3Q0JBE5_DIACI	S	EIFDETELS(+79.97)QNDITK	9	15	Probable WRKY transcription factor protein 1 isoform X1 OS=Diaphorina citri OX=121845 GN=LOC113470079 PE=4 SV=1	Probable WRKY transcription factor protein 1 isoform X1	LOC113470079	39.24	1860.8	2.3	172	186	S9:Phosphorylation (STY):1.86	S180	FDETELSQNDITK	69.9071	67.8258	82.1678	73.3002	506.365	431.994	670.04	536.133	0.13672	0.00277839
A0A1S3CVD1	A0A1S3CVD1|A0A1S3CVD1_DIACI	T	T(+79.97)PDIEKPDDKEPLVKDDVTK	1	20	Titin-like OS=Diaphorina citri OX=121845 GN=LOC103505994 PE=4 SV=1	Titin-like	LOC103505994	52.93	2361.14	0	325	344	T1:Phosphorylation (STY):41.28	T325	ADKADKTPDIEKP	191.953	615.194	2082.58	963.243	8011.97	5726.85	7573.21	7104.01	0.135591	0.00245907
A0A1S3DI91	A0A1S3DI91|A0A1S3DI91_DIACI	S	RNS(+79.97)VGGEDNLGLTVGNETR	3	19	Cadherin-3 OS=Diaphorina citri OX=121845 GN=LOC103519204 PE=4 SV=1	Cadherin-3	LOC103519204	49.71	2066.94	-5.5	728	746	S3:Phosphorylation (STY):59.20	S730	SNSRRNSVGGEDN	4977.67	2658.8	2225.36	3287.28	14230.9	36026	23490.4	24582.4	0.133725	0.0287949
A0A3Q0IYN3	A0A3Q0IYN3|A0A3Q0IYN3_DIACI	S	LSAC(+57.02)PS(+79.97)DIS(+79.97)IDENC(+57.02)PIHGK	6	19	Uncharacterized protein LOC108252728 OS=Diaphorina citri OX=121845 GN=LOC108252728 PE=4 SV=1	Uncharacterized protein LOC108252728	LOC108252728	55.36	2271.89	0.2	86	104	C4:Carbamidomethylation:1000.00;S6:Phosphorylation (STY):33.81;S9:Phosphorylation (STY):52.22;C14:Carbamidomethylation:1000.00	S91	RLSACPSDISIDE	1429.81	1511.8	5019.42	2653.68	14187.8	13753.6	32442.5	20128	0.13184	0.049491
A0A3Q0IYN3	A0A3Q0IYN3|A0A3Q0IYN3_DIACI	S	LSAC(+57.02)PS(+79.97)DIS(+79.97)IDENC(+57.02)PIHGK	9	19	Uncharacterized protein LOC108252728 OS=Diaphorina citri OX=121845 GN=LOC108252728 PE=4 SV=1	Uncharacterized protein LOC108252728	LOC108252728	55.36	2271.89	0.2	86	104	C4:Carbamidomethylation:1000.00;S6:Phosphorylation (STY):33.81;S9:Phosphorylation (STY):52.22;C14:Carbamidomethylation:1000.00	S94	ACPSDISIDENCP	1429.81	1511.8	5019.42	2653.68	14187.8	13753.6	32442.5	20128	0.13184	0.049491
A0A1S4EGX5	A0A1S4EGX5|A0A1S4EGX5_DIACI:A0A3Q0J027|A0A3Q0J027_DIACI	T	QSSQQSVT(+79.97)STAGQIGEDSEDTMK	8	23	Synapsin OS=Diaphorina citri OX=121845 GN=LOC103513662 PE=3 SV=1	Synapsin	LOC103513662	53.06	2493.02	1.2	298	320	T8:Phosphorylation (STY):0.00	T305	SSQQSVTSTAGQI	518.024	1355.77	2462.18	1445.32	7509.11	12132.6	13602.7	11081.5	0.130427	0.00739544
A0A3Q0JFC4	A0A3Q0JFC4|A0A3Q0JFC4_DIACI	S	VVC(+57.02)NS(+79.97)LDHLTMPGGK	5	15	NF-X1-type zinc finger protein NFXL1-like OS=Diaphorina citri OX=121845 GN=LOC103520129 PE=4 SV=1	NF-X1-type zinc finger protein NFXL1-like	LOC103520129	43.8	1706.75	1.4	298	312	C3:Carbamidomethylation:1000.00;S5:Phosphorylation (STY):30.64	S302	YKVVCNSLDHLTM	323.386	474.927	1497.76	765.357	3811.76	6218.16	8228.64	6086.19	0.125753	0.0160793
A0A3Q0J7B1	A0A3Q0J7B1|A0A3Q0J7B1_DIACI:A0A3Q0IPJ2|A0A3Q0IPJ2_DIACI	S	S(+79.97)PSSKGGGGGGGSK	1	14	Uncharacterized protein LOC103516041 isoform X2 OS=Diaphorina citri OX=121845 GN=LOC103516041 PE=4 SV=1	Uncharacterized protein LOC103516041 isoform X2	LOC103516041	24.35	1198.5	1.3	7	20	S1:Phosphorylation (STY):11.10	S7	MISMLKSPSSKGG	485.304	802.914	685.167	657.795	4437.59	5516.7	5805.36	5253.22	0.125218	0.000420474
A0A1S4E829	A0A1S4E829|A0A1S4E829_DIACI:A0A1S3CVS3|A0A1S3CVS3_DIACI:A0A3Q0IL98|A0A3Q0IL98_DIACI	S	RENS(+79.97)DFSLLLPR	4	12	Serine/threonine-protein kinase mig-15 isoform X1 OS=Diaphorina citri OX=121845 GN=LOC103506122 PE=4 SV=1	Serine/threonine-protein kinase mig-15 isoform X1	LOC103506122	42.06	1525.73	-5.8	705	716	S4:Phosphorylation (STY):26.52	S708	VLRRENSDFSLLL	143.543	390.053	369.817	301.138	2840.31	3213.36	1250.08	2434.58	0.123692	0.0245829
A0A1S3D1D1	A0A1S3D1D1|A0A1S3D1D1_DIACI:A0A3Q0JIZ1|A0A3Q0JIZ1_DIACI	S	ASIISPS(+79.97)SPTLPR	7	13	Uncharacterized protein LOC103509314 isoform X1 OS=Diaphorina citri OX=121845 GN=LOC103509314 PE=4 SV=1	Uncharacterized protein LOC103509314 isoform X1	LOC103509314	57.3	1404.7	-1.1	407	419	S7:Phosphorylation (STY):10.11	S413	ASIISPSSPTLPR	579.289	2507.82	205.173	1097.43	7481.53	8173.83	11025.2	8893.52	0.123396	0.00386822
A0A3Q0J0B8	A0A3Q0J0B8|A0A3Q0J0B8_DIACI	S	MNSILDTDS(+79.97)PSR	9	12	Twitchin-like OS=Diaphorina citri OX=121845 GN=LOC103512724 PE=3 SV=1	Twitchin-like	LOC103512724	66.09	1414.58	0	1293	1304	S9:Phosphorylation (STY):8.22	S1301	SILDTDSPSRSRS	187.708	79.3828	3142.68	1136.59	6842.65	9808.25	11032.9	9227.93	0.123168	0.00716758
A0A1S4E8Q6	A0A1S4E8Q6|A0A1S4E8Q6_DIACI	S	ASPLDPVQEMMYSS(+79.97)TVSLK	14	19	Vacuolar protein sorting-associated protein 13-like OS=Diaphorina citri OX=121845 GN=LOC103506922 PE=4 SV=1	Vacuolar protein sorting-associated protein 13-like	LOC103506922	35.89	2161.97	5.9	193	211	S14:Phosphorylation (STY):0.00	S206	QEMMYSSTVSLKK	232.2	1047.13	714.711	664.68	3081.6	6157.36	7142.42	5460.46	0.121726	0.0183009
A0A1S3DFV1	A0A1S3DFV1|A0A1S3DFV1_DIACI	S	MTIASSSS(+79.97)SSSISSAASGAGSK	8	22	Protein argonaute-2 OS=Diaphorina citri OX=121845 GN=LOC103517620 PE=4 SV=1	Protein argonaute-2	LOC103517620	61.8	2039.87	-1.6	1	22	S8:Phosphorylation (STY):0.00	S8	TIASSSSSSSISS	1853.56	339.802	589.889	927.752	6957.59	8866.89	7078.66	7634.38	0.121523	0.00098049
A0A3Q0JDN7	A0A3Q0JDN7|A0A3Q0JDN7_DIACI	S	VS(+79.97)EAELM(+15.99)LAKC(+57.02)TDGEITIT(+79.97)KSS(+79.97)GEVAAPR	2	29	DNA ligase 1 OS=Diaphorina citri OX=121845 GN=LOC103516720 PE=4 SV=1	DNA ligase 1	LOC103516720	29.58	3318.42	-7.3	352	380	S2:Phosphorylation (STY):0.00;M7:Oxidation (M):1000.00;C11:Carbamidomethylation:1000.00;T19:Phosphorylation (STY):0.00;S22:Phosphorylation (STY):0.00	S353	LDGEKVSEAELML	55.9149	167.927	134.83	119.557	522.062	1412.33	1062.86	999.083	0.119667	0.0280785
A0A3Q0JDN7	A0A3Q0JDN7|A0A3Q0JDN7_DIACI	T	VS(+79.97)EAELM(+15.99)LAKC(+57.02)TDGEITIT(+79.97)KSS(+79.97)GEVAAPR	19	29	DNA ligase 1 OS=Diaphorina citri OX=121845 GN=LOC103516720 PE=4 SV=1	DNA ligase 1	LOC103516720	29.58	3318.42	-7.3	352	380	S2:Phosphorylation (STY):0.00;M7:Oxidation (M):1000.00;C11:Carbamidomethylation:1000.00;T19:Phosphorylation (STY):0.00;S22:Phosphorylation (STY):0.00	T370	DGEITITKSSGEV	55.9149	167.927	134.83	119.557	522.062	1412.33	1062.86	999.083	0.119667	0.0280785
A0A3Q0JDN7	A0A3Q0JDN7|A0A3Q0JDN7_DIACI	S	VS(+79.97)EAELM(+15.99)LAKC(+57.02)TDGEITIT(+79.97)KSS(+79.97)GEVAAPR	22	29	DNA ligase 1 OS=Diaphorina citri OX=121845 GN=LOC103516720 PE=4 SV=1	DNA ligase 1	LOC103516720	29.58	3318.42	-7.3	352	380	S2:Phosphorylation (STY):0.00;M7:Oxidation (M):1000.00;C11:Carbamidomethylation:1000.00;T19:Phosphorylation (STY):0.00;S22:Phosphorylation (STY):0.00	S373	ITITKSSGEVAAP	55.9149	167.927	134.83	119.557	522.062	1412.33	1062.86	999.083	0.119667	0.0280785
A0A1S3D4H6	A0A1S3D4H6|A0A1S3D4H6_DIACI:A0A1S3D498|A0A1S3D498_DIACI	S	KNKNS(+79.97)LEPK	5	9	Uncharacterized protein LOC103511153 isoform X3 OS=Diaphorina citri OX=121845 GN=LOC103511153 PE=4 SV=1	Uncharacterized protein LOC103511153 isoform X3	LOC103511153	31.95	1136.56	4.6	277	285		S281	IKKNKNSLEPKYS	1107.25		89.6881	598.467	4448.55	5673.07		5060.81	0.118255	0.030382
A0A1S4EG41	A0A1S4EG41|A0A1S4EG41_DIACI	S	DEEGLETTLTTEPSPLES(+79.97)SR	18	20	LOW QUALITY PROTEIN: 14-3-3 protein epsilon OS=Diaphorina citri OX=121845 GN=LOC103512747 PE=3 SV=1	LOW QUALITY PROTEIN: 14-3-3 protein epsilon	LOC103512747	44.91	2269.98	1.7	239	258	S18:Phosphorylation (STY):0.00	S256	EPSPLESSRSPPP	347.62	1662.08	445.123	818.273	9352.11	6138.79	5492.96	6994.62	0.116986	0.00817076
A0A1S4EBF9	A0A1S4EBF9|A0A1S4EBF9_DIACI	S	KIS(+79.97)SGKVNVDT(+79.97)EEVLSTLTTR	3	21	Uncharacterized protein LOC108252395 OS=Diaphorina citri OX=121845 GN=LOC108252395 PE=4 SV=1	Uncharacterized protein LOC108252395	LOC108252395	38.5	2436.16	-6.4	64	84	S3:Phosphorylation (STY):0.00;T11:Phosphorylation (STY):4.59	S66	ELLRKISSGKVNV		705.183	106.698	405.941	3549.46	3318	3804.78	3557.41	0.114111	0.0016263
A0A1S4EBF9	A0A1S4EBF9|A0A1S4EBF9_DIACI	T	KIS(+79.97)SGKVNVDT(+79.97)EEVLSTLTTR	11	21	Uncharacterized protein LOC108252395 OS=Diaphorina citri OX=121845 GN=LOC108252395 PE=4 SV=1	Uncharacterized protein LOC108252395	LOC108252395	38.5	2436.16	-6.4	64	84	S3:Phosphorylation (STY):0.00;T11:Phosphorylation (STY):4.59	T74	GKVNVDTEEVLST		705.183	106.698	405.941	3549.46	3318	3804.78	3557.41	0.114111	0.0016263
A0A1S4ECK1	A0A1S4ECK1|A0A1S4ECK1_DIACI	S	DVNFDGPDS(+79.97)DDDEADDGEYLLAVYGTHAR	9	29	Uncharacterized protein LOC108252457 OS=Diaphorina citri OX=121845 GN=LOC108252457 PE=4 SV=2	Uncharacterized protein LOC108252457	LOC108252457	72.56	3250.29	3.6	282	310	S9:Phosphorylation (STY):12.23	S290	NFDGPDSDDDEAD	168.738	1356.71	229.124	584.856	3393.9	6135.3	6032.95	5187.38	0.112746	0.0092291
A0A3Q0IST9	A0A3Q0IST9|A0A3Q0IST9_DIACI	S	RS(+79.97)SSDS(+79.97)PPPLLIHR	2	14	Uncharacterized protein LOC103509128 OS=Diaphorina citri OX=121845 GN=LOC103509128 PE=4 SV=1	Uncharacterized protein LOC103509128	LOC103509128	50.34	1720.77	-10.1	911	924	S2:Phosphorylation (STY):0.00;S6:Phosphorylation (STY):0.00	S912	ELKSRRSSSDSPP	941.064	2144.79	656.1	1247.32	11844.7	15986.9	9441.82	12424.5	0.100392	0.0047191
A0A3Q0IST9	A0A3Q0IST9|A0A3Q0IST9_DIACI	S	RS(+79.97)SSDS(+79.97)PPPLLIHR	6	14	Uncharacterized protein LOC103509128 OS=Diaphorina citri OX=121845 GN=LOC103509128 PE=4 SV=1	Uncharacterized protein LOC103509128	LOC103509128	50.34	1720.77	-10.1	911	924	S2:Phosphorylation (STY):0.00;S6:Phosphorylation (STY):0.00	S916	RRSSSDSPPPLLI	941.064	2144.79	656.1	1247.32	11844.7	15986.9	9441.82	12424.5	0.100392	0.0047191
A0A1S3D0A6	A0A1S3D0A6|A0A1S3D0A6_DIACI	S	SPS(+79.97)PPPPSEPSPEQA	3	15	Pyridoxal-dependent decarboxylase domain-containing protein 2 OS=Diaphorina citri OX=121845 GN=LOC103508731 PE=4 SV=1	Pyridoxal-dependent decarboxylase domain-containing protein 2	LOC103508731	51.94	1582.66	-5.8	697	711	S3:Phosphorylation (STY):0.00	S699	GEDKSPSPPPPSE	452.065	938.902	165.164	518.71	5382.24	5859.14	4339.35	5193.58	0.0998753	0.000742102
A0A3Q0ISV8	A0A3Q0ISV8|A0A3Q0ISV8_DIACI	S	LASS(+79.97)YPGS(+79.97)SGNLLAGEELR	4	19	AMP deaminase OS=Diaphorina citri OX=121845 GN=LOC103509162 PE=3 SV=1	AMP deaminase	LOC103509162	39.63	2079.89	2.1	57	75	S4:Phosphorylation (STY):0.00;S8:Phosphorylation (STY):0.00	S60	GPKLASSYPGSSG	1185.99	465.737	591.746	747.826	5058.19	7684.86	10081.8	7608.29	0.0982908	0.00948582
A0A3Q0ISV8	A0A3Q0ISV8|A0A3Q0ISV8_DIACI	S	LASS(+79.97)YPGS(+79.97)SGNLLAGEELR	8	19	AMP deaminase OS=Diaphorina citri OX=121845 GN=LOC103509162 PE=3 SV=1	AMP deaminase	LOC103509162	39.63	2079.89	2.1	57	75	S4:Phosphorylation (STY):0.00;S8:Phosphorylation (STY):0.00	S64	ASSYPGSSGNLLA	1185.99	465.737	591.746	747.826	5058.19	7684.86	10081.8	7608.29	0.0982908	0.00948582
A0A3Q0ITU5	A0A3Q0ITU5|A0A3Q0ITU5_DIACI	S	SLVDETEGKQPS(+79.97)PSK	12	15	Muscle M-line assembly protein unc-89-like OS=Diaphorina citri OX=121845 GN=LOC113467622 PE=4 SV=1	Muscle M-line assembly protein unc-89-like	LOC113467622	37.81	1680.76	1.4	332	346	S12:Phosphorylation (STY):11.10	S343	TEGKQPSPSKTPA	239.684	144.882	216.627	200.398	1508.06	1744.88	2901.54	2051.49	0.097684	0.0127402
A0A3Q0IZK0	A0A3Q0IZK0|A0A3Q0IZK0_DIACI	S	KGS(+79.97)LVPGSGSS(+79.97)SR	3	13	LOW QUALITY PROTEIN: twitchin-like OS=Diaphorina citri OX=121845 GN=LOC103512392 PE=4 SV=1	LOW QUALITY PROTEIN: twitchin-like	LOC103512392	31.8	1377.57	0.2	1115	1127	S3:Phosphorylation (STY):56.99;S11:Phosphorylation (STY):0.00	S1117	TDSRKGSLVPGSG	2654.67	147.961	4380.01	2394.22	22238.2	26065.6	27340.5	25214.8	0.0949529	0.000313937
A0A3Q0IZK0	A0A3Q0IZK0|A0A3Q0IZK0_DIACI	S	KGS(+79.97)LVPGSGSS(+79.97)SR	11	13	LOW QUALITY PROTEIN: twitchin-like OS=Diaphorina citri OX=121845 GN=LOC103512392 PE=4 SV=1	LOW QUALITY PROTEIN: twitchin-like	LOC103512392	31.8	1377.57	0.2	1115	1127	S3:Phosphorylation (STY):56.99;S11:Phosphorylation (STY):0.00	S1125	VPGSGSSSRRGSL	2654.67	147.961	4380.01	2394.22	22238.2	26065.6	27340.5	25214.8	0.0949529	0.000313937
A0A3Q0JCJ3	A0A3Q0JCJ3|A0A3Q0JCJ3_DIACI	T	GST(+79.97)TPPLSPAIAR	3	13	Uncharacterized protein LOC113471341 OS=Diaphorina citri OX=121845 GN=LOC113471341 PE=4 SV=1	Uncharacterized protein LOC113471341	LOC113471341	54.41	1346.66	-0.8	85	97	T3:Phosphorylation (STY):0.00	T87	LLNRGSTTPPLSP	217.775	163.495	293.8	225.023	2362.9	1827.54	2984.69	2391.71	0.0940847	0.00299237
A0A3Q0ITT6	A0A3Q0ITT6|A0A3Q0ITT6_DIACI	S	ESAVSKS(+79.97)PVGSSIPSPT(+79.97)KGDSK	7	22	Uncharacterized protein LOC103509596 OS=Diaphorina citri OX=121845 GN=LOC103509596 PE=4 SV=1	Uncharacterized protein LOC103509596	LOC103509596	29.53	2304.03	1.8	414	435	S7:Phosphorylation (STY):6.65;T17:Phosphorylation (STY):0.00	S420	ESAVSKSPVGSSI	248.454	838.589	612.359	566.467	5274.73	7399.48	8733.94	7136.05	0.0793811	0.00300938
A0A3Q0ITT6	A0A3Q0ITT6|A0A3Q0ITT6_DIACI	T	ESAVSKS(+79.97)PVGSSIPSPT(+79.97)KGDSK	17	22	Uncharacterized protein LOC103509596 OS=Diaphorina citri OX=121845 GN=LOC103509596 PE=4 SV=1	Uncharacterized protein LOC103509596	LOC103509596	29.53	2304.03	1.8	414	435	S7:Phosphorylation (STY):6.65;T17:Phosphorylation (STY):0.00	T430	SSIPSPTKGDSKE	248.454	838.589	612.359	566.467	5274.73	7399.48	8733.94	7136.05	0.0793811	0.00300938
A0A3Q0IYR2	A0A3Q0IYR2|A0A3Q0IYR2_DIACI:A0A1S3D4M5|A0A1S3D4M5_DIACI	S	KPMYTLTS(+79.97)PTK	8	11	LOW QUALITY PROTEIN: uncharacterized protein LOC113468551 OS=Diaphorina citri OX=121845 GN=LOC113468551 PE=4 SV=1	LOW QUALITY PROTEIN: uncharacterized protein LOC113468551	LOC113468551	29.6	1345.64	0.1	2378	2388	S8:Phosphorylation (STY):11.06	S2385	PMYTLTSPTKHAK	542.679	321.368	785.016	549.688	7330.2	8748.65	4740.37	6939.74	0.0792087	0.00565277
A0A1S3DI91	A0A1S3DI91|A0A1S3DI91_DIACI	S	DEGS(+79.97)IGTSDYVVSFAR	4	16	Cadherin-3 OS=Diaphorina citri OX=121845 GN=LOC103519204 PE=4 SV=1	Cadherin-3	LOC103519204	66.93	1781.75	1.9	657	672	S4:Phosphorylation (STY):53.53	S660	LERDEGSIGTSDY	314.922	414.237	154.743	294.634	2870.54	4373.63	3991.46	3745.21	0.0786696	0.00165298
A0A3Q0IM19	A0A3Q0IM19|A0A3Q0IM19_DIACI	T	ATEDTVT(+79.97)SEEVKTPEMEAK	7	19	Uncharacterized protein LOC103506519 OS=Diaphorina citri OX=121845 GN=LOC103506519 PE=4 SV=1	Uncharacterized protein LOC103506519	LOC103506519	27.81	2173.93	2	1172	1190	T7:Phosphorylation (STY):0.00	T1178	ATEDTVTSEEVKT	422.853	627.945	250.275	433.691	8698.67	5690.04	2319.44	5569.38	0.0778705	0.0496937
A0A1S4ENP4	A0A1S4ENP4|A0A1S4ENP4_DIACI:A0A3Q0JEQ5|A0A3Q0JEQ5_DIACI	S	NFMIHC(+57.02)FDDVS(+79.97)R	11	12	Uncharacterized protein LOC108253747 isoform X1 OS=Diaphorina citri OX=121845 GN=LOC108253747 PE=4 SV=1	Uncharacterized protein LOC108253747 isoform X1	LOC108253747	36.06	1619.63	-5.6	252	263	C6:Carbamidomethylation:1000.00	S262	HCFDDVSREIT__		55.2396	40.4725	47.8561	519.821	848.134	493.937	620.631	0.0771087	0.030137
A0A3Q0IV83	A0A3Q0IV83|A0A3Q0IV83_DIACI	T	VT(+79.97)ISGDDIPGGTDDSDHFYVR	2	21	Uncharacterized protein LOC113467901 OS=Diaphorina citri OX=121845 GN=LOC113467901 PE=4 SV=1	Uncharacterized protein LOC113467901	LOC113467901	47.14	2344.98	2.5	122	142	T2:Phosphorylation (STY):0.00	T123	GQPLRVTISGDDI	3872.55	747.923	3548.66	2723.04	34681.7	50336.1	22125.5	35714.5	0.0762449	0.0159503
A0A3Q0JF22	A0A3Q0JF22|A0A3Q0JF22_DIACI	S	GSGDSVTPS(+79.97)PPPQS(+79.97)SPR	9	17	Uncharacterized protein LOC103517353 OS=Diaphorina citri OX=121845 GN=LOC103517353 PE=3 SV=1	Uncharacterized protein LOC103517353	LOC103517353	53.42	1811.71	1.8	863	879	S9:Phosphorylation (STY):13.30;S14:Phosphorylation (STY):0.00	S871	GDSVTPSPPPQSS	967.163	270.909	980.42	739.497	13516.5	10878.1	9483.76	11292.8	0.065484	0.000938375
A0A3Q0JF22	A0A3Q0JF22|A0A3Q0JF22_DIACI	S	GSGDSVTPS(+79.97)PPPQS(+79.97)SPR	14	17	Uncharacterized protein LOC103517353 OS=Diaphorina citri OX=121845 GN=LOC103517353 PE=3 SV=1	Uncharacterized protein LOC103517353	LOC103517353	53.42	1811.71	1.8	863	879	S9:Phosphorylation (STY):13.30;S14:Phosphorylation (STY):0.00	S876	PSPPPQSSPRKRR	967.163	270.909	980.42	739.497	13516.5	10878.1	9483.76	11292.8	0.065484	0.000938375
A0A3Q0IZK0	A0A3Q0IZK0|A0A3Q0IZK0_DIACI	S	S(+79.97)SLKKPESK	1	9	LOW QUALITY PROTEIN: twitchin-like OS=Diaphorina citri OX=121845 GN=LOC103512392 PE=4 SV=1	LOW QUALITY PROTEIN: twitchin-like	LOC103512392	52.43	1082.54	-2.1	486	494	S1:Phosphorylation (STY):0.00	S486	DKPERKSSLKKPE	8878.37	82849	4036.96	31921.4		529694	461198	495446	0.0644297	0.00155568
A0A1S3DFV1	A0A1S3DFV1|A0A1S3DFV1_DIACI	S	MTIASS(+79.97)SSSSSISSAASGAGSK	6	22	Protein argonaute-2 OS=Diaphorina citri OX=121845 GN=LOC103517620 PE=4 SV=1	Protein argonaute-2	LOC103517620	51.19	2039.87	-0.5	1	22	S6:Phosphorylation (STY):0.00	S6	_MTIASSSSSSSI	1131.14	123.695	132.93	462.587	6957.59	8866.89	7078.66	7634.38	0.0605926	0.000517171
A0A3Q0IJT0	A0A3Q0IJT0|A0A3Q0IJT0_DIACI	S	SKPVTPSS(+79.97)PVS(+79.97)TPT(+79.97)SPTGPGR	8	21	ATP citrate synthase OS=Diaphorina citri OX=121845 GN=LOC103505301 PE=3 SV=1	ATP citrate synthase	LOC103505301	61.25	2275.95	0.7	355	375	S8:Phosphorylation (STY):11.06;S11:Phosphorylation (STY):0.00;T14:Phosphorylation (STY):0.00	S362	KPVTPSSPVSTPT	6528.96	14344.6	782.033	7218.53	111699	139325	132867	127964	0.0564108	0.000196525
A0A3Q0IJT0	A0A3Q0IJT0|A0A3Q0IJT0_DIACI	S	SKPVTPSS(+79.97)PVS(+79.97)TPT(+79.97)SPTGPGR	11	21	ATP citrate synthase OS=Diaphorina citri OX=121845 GN=LOC103505301 PE=3 SV=1	ATP citrate synthase	LOC103505301	61.25	2275.95	0.7	355	375	S8:Phosphorylation (STY):11.06;S11:Phosphorylation (STY):0.00;T14:Phosphorylation (STY):0.00	S365	TPSSPVSTPTSPT	6528.96	14344.6	782.033	7218.53	111699	139325	132867	127964	0.0564108	0.000196525
A0A3Q0IJT0	A0A3Q0IJT0|A0A3Q0IJT0_DIACI	T	SKPVTPSS(+79.97)PVS(+79.97)TPT(+79.97)SPTGPGR	14	21	ATP citrate synthase OS=Diaphorina citri OX=121845 GN=LOC103505301 PE=3 SV=1	ATP citrate synthase	LOC103505301	61.25	2275.95	0.7	355	375	S8:Phosphorylation (STY):11.06;S11:Phosphorylation (STY):0.00;T14:Phosphorylation (STY):0.00	T368	SPVSTPTSPTGPG	6528.96	14344.6	782.033	7218.53	111699	139325	132867	127964	0.0564108	0.000196525
A0A3Q0IPJ2	A0A3Q0IPJ2|A0A3Q0IPJ2_DIACI	S	S(+79.97)ST(+79.97)AELGETPK	1	11	LOW QUALITY PROTEIN: obscurin-like OS=Diaphorina citri OX=121845 GN=LOC103507575 PE=3 SV=1	LOW QUALITY PROTEIN: obscurin-like	LOC103507575	42.61	1278.48	-1.7	2442	2452	S1:Phosphorylation (STY):0.00;T3:Phosphorylation (STY):8.69	S2442	SHVTSRSSTAELG	278.38	343.572	624.653	415.535	8204.82	7845.3	6826	7625.37	0.0544937	7.17162e-05
A0A3Q0IPJ2	A0A3Q0IPJ2|A0A3Q0IPJ2_DIACI	T	S(+79.97)ST(+79.97)AELGETPK	3	11	LOW QUALITY PROTEIN: obscurin-like OS=Diaphorina citri OX=121845 GN=LOC103507575 PE=3 SV=1	LOW QUALITY PROTEIN: obscurin-like	LOC103507575	42.61	1278.48	-1.7	2442	2452	S1:Phosphorylation (STY):0.00;T3:Phosphorylation (STY):8.69	T2444	VTSRSSTAELGET	278.38	343.572	624.653	415.535	8204.82	7845.3	6826	7625.37	0.0544937	7.17162e-05
A0A1S3DHP1	A0A1S3DHP1|A0A1S3DHP1_DIACI	S	RMILNSDS(+79.97)DTDDK	8	13	Protein timeless homolog OS=Diaphorina citri OX=121845 GN=LOC103518793 PE=3 SV=2	Protein timeless homolog	LOC103518793	28.1	1588.64	-3.8	607	619	S8:Phosphorylation (STY):0.00	S614	MILNSDSDTDDKN	400.982	24.2544	275.696	233.644	4484.57	6558.08	3134.2	4725.62	0.049442	0.0109589
A0A3Q0J1B4	A0A3Q0J1B4|A0A3Q0J1B4_DIACI:A0A3Q0J181|A0A3Q0J181_DIACI	S	SM(+15.99)ANTGGGNLIS(+79.97)AK	12	14	Uncharacterized protein LOC103513163 OS=Diaphorina citri OX=121845 GN=LOC103513163 PE=4 SV=1	Uncharacterized protein LOC103513163	LOC103513163	27.12	1415.61	-18.5	432	445	M2:Oxidation (M):1000.00;S12:Phosphorylation (STY):4.98	S443	GGGNLISAKKAVV	338.747	162.97	300.314	267.344	5665.48	5712.76	5734.55	5704.26	0.0468674	7.30184e-08
A0A3Q0J8I4	A0A3Q0J8I4|A0A3Q0J8I4_DIACI	S	TSSATTSGS(+79.97)PFEPDVNTQDR	9	20	Dentin sialophosphoprotein-like OS=Diaphorina citri OX=121845 GN=LOC113469479 PE=4 SV=1	Dentin sialophosphoprotein-like	LOC113469479	51.74	2175.9	2.5	812	831	S9:Phosphorylation (STY):12.16	S820	SATTSGSPFEPDV	290.93	219.864	110.957	207.25	4923.71	5139.91	4036.97	4700.2	0.044094	0.000192703
A0A3Q0IVQ8	A0A3Q0IVQ8|A0A3Q0IVQ8_DIACI	S	DIPTMSMSTETNS(+79.97)SWLK	13	17	LOW QUALITY PROTEIN: titin-like OS=Diaphorina citri OX=121845 GN=LOC103510529 PE=3 SV=1	LOW QUALITY PROTEIN: titin-like	LOC103510529	57.54	2006.84	3	5186	5202	S13:Phosphorylation (STY):0.00	S5198	MSTETNSSWLKEH	377.508	358.843	272.627	336.326	8603.34	13675.8	8173.04	10150.7	0.0331332	0.00514462
A0A3Q0JEQ9	A0A3Q0JEQ9|A0A3Q0JEQ9_DIACI	S	AALS(+79.97)FGSPSNSK	4	12	Calcium/calmodulin-dependent protein kinase type II subunit delta-like OS=Diaphorina citri OX=121845 GN=LOC113471771 PE=4 SV=1	Calcium/calmodulin-dependent protein kinase type II subunit delta-like	LOC113471771	66.51	1244.54	-1.3	25	36	S4:Phosphorylation (STY):26.52	S28	ALKAALSFGSPSN	6010.88	4793.08	5776.87	5526.94	11245.5	10488.3	11053.1	10929	0.505714	0.000245764
A0A3Q0J6F6	A0A3Q0J6F6|A0A3Q0J6F6_DIACI	S	ADFSDS(+79.97)LNK	6	9	Dynactin subunit 2 OS=Diaphorina citri OX=121845 GN=LOC103515576 PE=3 SV=1	Dynactin subunit 2	LOC103515576	28.38	1075.42	0.3	60	68	S6:Phosphorylation (STY):9.40	S65	RADFSDSLNKLHK	254.83	216.678	263.982	245.163	183.118		184.414	183.766	1.33411	0.0463554
A0A3Q0J531	A0A3Q0J531|A0A3Q0J531_DIACI	T	ADPNAAEVISET(+79.97)PPPSPSPPR	12	21	Target of rapamycin complex subunit lst8 OS=Diaphorina citri OX=121845 GN=LOC103514889 PE=3 SV=1	Target of rapamycin complex subunit lst8	LOC103514889	54.71	2208.01	4.8	123	143	T12:Phosphorylation (STY):8.22	T134	AEVISETPPPSPS	3671.39	4600.54	3415.02	3895.65	6187	6690.95	5109.59	5995.85	0.649724	0.0234981
A0A3Q0IRX6	A0A3Q0IRX6|A0A3Q0IRX6_DIACI	S	ADSAESNLS(+79.97)LIR	9	12	Paramyosin, long form OS=Diaphorina citri OX=121845 GN=LOC103508718 PE=4 SV=1	Paramyosin, long form	LOC103508718	63.25	1354.61	-0.5	1310	1321	S9:Phosphorylation (STY):32.69	S1318	SAESNLSLIRAKH	12378.5	14018.1	10977.2	12458	17403	17295.1	18445.7	17714.6	0.703259	0.00525741
A0A3Q0IR07	A0A3Q0IR07|A0A3Q0IR07_DIACI:A0A3Q0IR16|A0A3Q0IR16_DIACI:A0A3Q0IR26|A0A3Q0IR26_DIACI	S	AEESFS(+79.97)EKS(+79.97)HNLR	6	13	Uncharacterized protein LOC103508110 isoform X1 OS=Diaphorina citri OX=121845 GN=LOC103508110 PE=4 SV=1	Uncharacterized protein LOC103508110 isoform X1	LOC103508110	41.62	1692.65	-0.8	185	197	S6:Phosphorylation (STY):22.85;S9:Phosphorylation (STY):14.62	S190	KAEESFSEKSHNL	16358.6	17516.7	14936.3	16270.5	21017	25305.7	28916.2	25079.6	0.648755	0.0214388
A0A3Q0IR07	A0A3Q0IR07|A0A3Q0IR07_DIACI:A0A3Q0IR16|A0A3Q0IR16_DIACI:A0A3Q0IR26|A0A3Q0IR26_DIACI	S	AEESFS(+79.97)EKS(+79.97)HNLR	9	13	Uncharacterized protein LOC103508110 isoform X1 OS=Diaphorina citri OX=121845 GN=LOC103508110 PE=4 SV=1	Uncharacterized protein LOC103508110 isoform X1	LOC103508110	41.62	1692.65	-0.8	185	197	S6:Phosphorylation (STY):22.85;S9:Phosphorylation (STY):14.62	S193	ESFSEKSHNLRQK	16358.6	17516.7	14936.3	16270.5	21017	25305.7	28916.2	25079.6	0.648755	0.0214388
A0A3Q0IVK3	A0A3Q0IVK3|A0A3Q0IVK3_DIACI	S	AFS(+79.97)QGQIIDTVRPNLTK	3	17	Phospholipid-transporting ATPase OS=Diaphorina citri OX=121845 GN=LOC103510070 PE=3 SV=1	Phospholipid-transporting ATPase	LOC103510070	25.18	1966.99	4.4	70	86	S3:Phosphorylation (STY):8.15	S72	GHQRAFSQGQIID	337.474	316.776	468.044	374.098	646.031	681.665	699.353	675.683	0.553659	0.00377488
A0A3Q0IMI0	A0A3Q0IMI0|A0A3Q0IMI0_DIACI	S	AGSNTSVATNGWES(+79.97)PK	14	16	Protein enabled-like OS=Diaphorina citri OX=121845 GN=LOC103524751 PE=3 SV=1	Protein enabled-like	LOC103524751	64.72	1684.71	4.3	373	388	S14:Phosphorylation (STY):18.93	S386	ATNGWESPKTSRK	10261.3	6953.68	9361	8858.65	14239.2	17115.9	14276	15210.3	0.582409	0.00981296
A0A3Q0IRT6	A0A3Q0IRT6|A0A3Q0IRT6_DIACI:A0A3Q0ILZ7|A0A3Q0ILZ7_DIACI	S	AIIPDLGNDAAS(+79.97)LK	12	14	Talin-1 isoform X3 OS=Diaphorina citri OX=121845 GN=LOC103506485 PE=4 SV=1	Talin-1 isoform X3	LOC103506485	56.26	1476.72	1.5	534	547		S545	LGNDAASLKWKET	2947.57	2547.78	2132.06	2542.47	1723.21	1772.85	1321.01	1605.69	1.58341	0.0272661
A0A1S3CY94	A0A1S3CY94|A0A1S3CY94_DIACI	S	AIS(+79.97)PEQTDSVHSGTPEPFEVENR	3	23	Nuclear receptor-binding protein homolog OS=Diaphorina citri OX=121845 GN=LOC103507536 PE=4 SV=1	Nuclear receptor-binding protein homolog	LOC103507536	70.73	2605.13	-2.3	90	112	S3:Phosphorylation (STY):42.68	S92	IRPRAISPEQTDS	23672.2	23419.9	24139.7	23743.9	19171.8	12262	15395.9	15609.9	1.52109	0.0154821
A0A1S4ERI5	A0A1S4ERI5|A0A1S4ERI5_DIACI:A0A3Q0IJI6|A0A3Q0IJI6_DIACI:A0A3Q0IQ26|A0A3Q0IQ26_DIACI:A0A3Q0IJS0|A0A3Q0IJS0_DIACI:A0A3Q0IP46|A0A3Q0IP46_DIACI	T	AISSGPKT(+79.97)PPEPHIK	8	15	Uncharacterized protein OS=Diaphorina citri OX=121845 GN=LOC108254290 PE=4 SV=1	Uncharacterized protein	LOC108254290	55.03	1637.82	-3.7	45	59	T8:Phosphorylation (STY):10.19	T52	ISSGPKTPPEPHI	2362.47	3063.6	2488.18	2638.08	1881.26	1698.32	1263.37	1614.32	1.63418	0.0224392
A0A3Q0JIR1	A0A3Q0JIR1|A0A3Q0JIR1_DIACI	S	AKIS(+79.97)DIVMGAEPNVSAR	4	17	Cytospin-A-like OS=Diaphorina citri OX=121845 GN=LOC113471793 PE=4 SV=1	Cytospin-A-like	LOC113471793	53.38	1836.88	-4.4	135	151	S4:Phosphorylation (STY):108.98	S138	AKRAKISDIVMGA	1781.17	1637.53	1521.08	1646.59	1042.06	1305.58	793.792	1047.15	1.57246	0.0224496
A0A3Q0IY18	A0A3Q0IY18|A0A3Q0IY18_DIACI	S	ALISDDS(+79.97)IAR	7	10	V-type proton ATPase subunit a OS=Diaphorina citri OX=121845 GN=LOC103509452 PE=3 SV=1	V-type proton ATPase subunit a	LOC103509452	45.14	1139.52	-3.8	217	226	S7:Phosphorylation (STY):34.94	S223	ALISDDSIARQNN	981.896	843.611	1112.23	979.245	626.632	755.141	569.734	650.502	1.50537	0.0257924
A0A3Q0JGR8	A0A3Q0JGR8|A0A3Q0JGR8_DIACI:A0A3Q0JGL4|A0A3Q0JGL4_DIACI	S	ALVETLS(+79.97)GDKK	7	11	Fatty acid synthase-like OS=Diaphorina citri OX=121845 GN=LOC103520811 PE=4 SV=1	Fatty acid synthase-like	LOC103520811	48.01	1239.61	-0.5	83	93	S7:Phosphorylation (STY):18.53	S89	ALVETLSGDKKTV	1132.47	1583.61	1785.92	1500.67	964.335	757.586	878.835	866.919	1.73104	0.0350603
A0A1S3D2M8	A0A1S3D2M8|A0A1S3D2M8_DIACI	S	AS(+79.97)GDVVQGPGPSGAASTAEGK	2	21	Uncharacterized protein LOC103509313 OS=Diaphorina citri OX=121845 GN=LOC103509313 PE=4 SV=1	Uncharacterized protein LOC103509313	LOC103509313	24.92	1921.84	2.5	336	356	S2:Phosphorylation (STY):16.78	S337	PRESKASGDVVQG	201.242	185.163	333.629	240.011	440.69	548.884	438.821	476.132	0.504086	0.0165285
A0A1S3D0C4	A0A1S3D0C4|A0A1S3D0C4_DIACI	S	AS(+79.97)IDAEVYER	2	10	Eukaryotic translation initiation factor 4B OS=Diaphorina citri OX=121845 GN=LOC103508743 PE=4 SV=1	Eukaryotic translation initiation factor 4B	LOC103508743	55.14	1231.51	-2.8	64	73	S2:Phosphorylation (STY):71.27	S65	PSAPRASIDAEVY	1051.89	1170.5	982.937	1068.44	605.001	501.69	881.89	662.86	1.61187	0.0323361
A0A1S3DSQ8	A0A1S3DSQ8|A0A1S3DSQ8_DIACI	S	AS(+79.97)LGQIKPPR	2	10	Aquaporin-2-like OS=Diaphorina citri OX=121845 GN=LOC103524045 PE=3 SV=1	Aquaporin-2-like	LOC103524045	69.54	1145.6	-0.8	11	20		S12	KSSSKASLGQIKP	22079.6	14041	13785.9	16635.5	22956.5	34355.3	31510.9	29607.6	0.561866	0.0413718
[truncated: 10,252 more rows]

## Sheet: B
Protein	Proteins	Amino acid	Modified peptide	Position in peptide	Sequence length	Description	Protein Name	Gene Name	-10LgP	Mass	ppm	Start	End	AScore	PTMLocation	MotifSequence	Intensity infected-1	Intensity infected-2	Intensity infected-3	Intensity free-1	Intensity free-2	Intensity free-3
[truncated: 52 more rows]
