# Supplementary material for: An integrated proteomic and phosphoproteomic analysis reveals α-crystallin A and vitellogenin A1 as key players involved in CLas infection in Diaphorina citri
Source: Research Square preprint supplement (doi:10.21203/rs.3.rs-7919843/v1), 2026-01-30
Supplement: Supplementary file 5 [file f7d59a4a1d43da942ca35f04.xlsx]

## Sheet: Total proteins
Protein	Protein Name	Gene Name	Function	ProteinGroup	FastaHeaders	Proteins	Peptides	RazorUniquePeptides	UniquePeptides	Coverage	MolWeight	LFQ intensity free-1	LFQ intensity free-2	LFQ intensity free-3	LFQ intensity infected-1	LFQ intensity infected-2	LFQ intensity infected-3	Identified or Quantified	GO annotations	KO(Name)	Pathways	Subcellular localization	Domain
A0A1S2X8S3	Large ribosomal subunit protein uL22	Rpl17		tr|A0A1S2X8S3|A0A1S2X8S3_DIACI;sp|Q0PXV9|RL17_DIACI	tr|A0A1S2X8S3|A0A1S2X8S3_DIACI Large ribosomal subunit protein uL22 OS=Diaphorina citri OX=121845 GN=Rpl17 PE=3 SV=1;sp|Q0PXV9|RL17_DIACI Large ribosomal subunit protein uL22 OS=Diaphorina citri OX=121845 GN=RpL17 PE=2 SV=1	2	5	5	5	25.9	21.676	1296900	1656100	1436400	2217300	1947900	2373600	Quantified	GO:0006412(BP:translation);GO:0015934(CC:large ribosomal subunit);GO:0003735(MF:structural constituent of ribosome)	K02890(NA)	ko03010(Ribosome)		PF00237(Ribosomal protein L22p/L17e)
Q0PXX8	Small ribosomal subunit protein uS2		FUNCTION: Required for the assembly and/or stability of the 40S ribosomal subunit. Required for the processing of the 20S rRNA-precursor to mature 18S rRNA in a late step of the maturation of 40S ribosomal subunits. {ECO:0000255|HAMAP-Rule:MF_03015}.	sp|Q0PXX8|RSSA_DIACI	sp|Q0PXX8|RSSA_DIACI Small ribosomal subunit protein uS2 OS=Diaphorina citri OX=121845 PE=2 SV=1	1	12	12	12	59.5	33.337	3712200	4886600	3916100	2156000	4307600	4373400	Quantified	GO:0000028(BP:ribosomal small subunit assembly);GO:0006412(BP:translation);GO:0022627(CC:cytosolic small ribosomal subunit);GO:0003735(MF:structural constituent of ribosome)	K02967(NA)	ko03010(Ribosome)	Cytoplasm	PF16122(40S ribosomal protein SA C-terminus);PF00318(Ribosomal protein S2)
A0A1S4EG25	Large ribosomal subunit protein eL18	LOC108252857		tr|A0A1S4EG25|A0A1S4EG25_DIACI;tr|A0A1S4EG93|A0A1S4EG93_DIACI;sp|Q0PXY6|RL18_DIACI	tr|A0A1S4EG25|A0A1S4EG25_DIACI Large ribosomal subunit protein eL18 OS=Diaphorina citri OX=121845 GN=LOC108252857 PE=3 SV=1;tr|A0A1S4EG93|A0A1S4EG93_DIACI Large ribosomal subunit protein eL18 OS=Diaphorina citri OX=121845 GN=LOC108252857 PE=3 SV=1;sp|Q0PXY	3	3	3	3	27.2	15.209	1471600	1476900	1278700	1573600	1607900	1885300	Quantified	GO:0006412(BP:translation);GO:0005840(CC:ribosome);GO:0003735(MF:structural constituent of ribosome)				PF17135(Ribosomal protein 60S L18 and 50S L18e)
A0A075W3Z0	Farnesoic acid o-methyltransferase	LOC103523376		tr|A0A075W3Z0|A0A075W3Z0_DIACI	tr|A0A075W3Z0|A0A075W3Z0_DIACI Farnesoic acid o-methyltransferase OS=Diaphorina citri OX=121845 GN=LOC103523376 PE=2 SV=1	1	3	3	3	13.2	31.247	41865	68832	84744		35190	53013	Quantified	GO:0032259(BP:methylation);GO:0008168(MF:methyltransferase activity)	K03183(NA)	ko00130(Ubiquinone and other terpenoid-quinone biosynthesis);ko01240(Biosynthesis of cofactors)		PF13489(Methyltransferase domain)
A0A0A7DNF9	Ferritin	LOC103514874	FUNCTION: Stores iron in a soluble, non-toxic, readily available form. Important for iron homeostasis. Iron is taken up in the ferrous form and deposited as ferric hydroxides after oxidation. {ECO:0000256|RuleBase:RU361145}.	tr|A0A0A7DNF9|A0A0A7DNF9_DIACI	tr|A0A0A7DNF9|A0A0A7DNF9_DIACI Ferritin OS=Diaphorina citri OX=121845 GN=LOC103514874 PE=2 SV=1	1	6	6	6	36.5	27.57	2718900	1996700	1083300	1622900	1357700	1580200	Quantified	GO:0006879(BP:cellular iron ion homeostasis);GO:0006826(BP:iron ion transport);GO:0005623(CC:cell);GO:0008199(MF:ferric iron binding);GO:0004322(MF:ferroxidase activity)				PF00210(Ferritin-like domain)
A0A0A7DNL8	Glutathione S-transferase	LOC103519049		tr|A0A0A7DNL8|A0A0A7DNL8_DIACI;tr|A0A482LN30|A0A482LN30_DIACI;tr|A0A3Q0J3L6|A0A3Q0J3L6_DIACI	tr|A0A0A7DNL8|A0A0A7DNL8_DIACI Glutathione S-transferase OS=Diaphorina citri OX=121845 GN=LOC103519049 PE=2 SV=1;tr|A0A482LN30|A0A482LN30_DIACI Glutathione S-transferase GST-3 OS=Diaphorina citri OX=121845 GN=GST-3 PE=2 SV=1	3	13	13	12	63.5	23.739	4390000	4788100	4701100	5794600	4373500	4284800	Quantified	GO:0016740(MF:transferase activity)	K00799(NA)	ko00480(Glutathione metabolism);ko00980(Metabolism of xenobiotics by cytochrome P450);ko00982(Drug metabolism - cytochrome P450);ko00983(Drug metabolism - other enzymes)		PF14497(Glutathione S-transferase, C-terminal domain);PF02798(Glutathione S-transferase, N-terminal domain)
A0A0A7DNM0	Glycerol-3-phosphate dehydrogenase (Fragment)			tr|A0A0A7DNM0|A0A0A7DNM0_DIACI	tr|A0A0A7DNM0|A0A0A7DNM0_DIACI Glycerol-3-phosphate dehydrogenase (Fragment) OS=Diaphorina citri OX=121845 PE=2 SV=1	1	8	3	3	63.1	15.385	1713500	2146000	2004400	5951200	3653100	3542300	Quantified	GO:0006072(BP:glycerol-3-phosphate metabolic process);GO:0009331(CC:glycerol-3-phosphate dehydrogenase complex);GO:0005509(MF:calcium ion binding);GO:0004368(MF:glycerol-3-phosphate dehydrogenase (quinone) activity)				PF16901(C-terminal domain of alpha-glycerophosphate oxidase)
A0A0A7DNS5	Cathepsin B (Fragment)			tr|A0A0A7DNS5|A0A0A7DNS5_DIACI	tr|A0A0A7DNS5|A0A0A7DNS5_DIACI Cathepsin B (Fragment) OS=Diaphorina citri OX=121845 PE=2 SV=1	1	3	3	3	32.5	16.653	313070	475040	454030	99102	872480	484130	Quantified	GO:0050790(BP:regulation of catalytic activity);GO:0004197(MF:cysteine-type endopeptidase activity)				PF00112(Papain family cysteine protease);PF08127(Peptidase family C1 propeptide)
A0A1S3DQH2	Facilitated trehalose transporter Tret1-like	LOC103522906		tr|A0A1S3DQH2|A0A1S3DQH2_DIACI;tr|A0A0A7DNU3|A0A0A7DNU3_DIACI;tr|A0A3Q0IV31|A0A3Q0IV31_DIACI	tr|A0A1S3DQH2|A0A1S3DQH2_DIACI Facilitated trehalose transporter Tret1-like OS=Diaphorina citri OX=121845 GN=LOC103522906 PE=4 SV=2;tr|A0A0A7DNU3|A0A0A7DNU3_DIACI Sugar transporter 1 OS=Diaphorina citri OX=121845 PE=2 SV=1;tr|A0A3Q0IV31|A0A3Q0IV31_DIACI Fa	3	4	4	4	19.5	37.255	375690	427340	559690	753440	532770	477530	Quantified	GO:0016021(CC:integral component of membrane);GO:0022857(MF:transmembrane transporter activity)				PF00083(Sugar (and other) transporter)
A0A0A7DNX4	Ras-related C3 botulinum toxin substrate 1	LOC103512003		tr|A0A0A7DNX4|A0A0A7DNX4_DIACI;tr|A0A3Q0JJS4|A0A3Q0JJS4_DIACI	tr|A0A0A7DNX4|A0A0A7DNX4_DIACI Ras-related C3 botulinum toxin substrate 1 OS=Diaphorina citri OX=121845 GN=LOC103512003 PE=2 SV=1	2	6	5	5	49	21.353	278830	409810	480530	172390	259750	457310	Quantified	GO:0007264(BP:small GTPase mediated signal transduction);GO:0005525(MF:GTP binding);GO:0003924(MF:GTPase activity)				PF00071(Ras family)
A0A0U4DX43	Cathepsin B-like cysteine peptidase	LOC103512321		tr|A0A0U4DX43|A0A0U4DX43_DIACI;tr|A0A1S3DUR0|A0A1S3DUR0_DIACI	tr|A0A0U4DX43|A0A0U4DX43_DIACI Cathepsin B-like cysteine peptidase OS=Diaphorina citri OX=121845 GN=LOC103512321 PE=2 SV=1	2	6	6	3	31	41.908	367100	428270	511430	514860	879060	941290	Quantified	GO:0050790(BP:regulation of catalytic activity);GO:0004197(MF:cysteine-type endopeptidase activity)				PF08127(Peptidase family C1 propeptide);PF00112(Papain family cysteine protease)
A0A1S3CUS8	Protein CREG1 isoform X3	LOC103504940		tr|A0A1S3CUS8|A0A1S3CUS8_DIACI;tr|A0A1S3CTG6|A0A1S3CTG6_DIACI	tr|A0A1S3CUS8|A0A1S3CUS8_DIACI Protein CREG1 isoform X3 OS=Diaphorina citri OX=121845 GN=LOC103504940 PE=4 SV=1;tr|A0A1S3CTG6|A0A1S3CTG6_DIACI Protein CREG1 isoform X1 OS=Diaphorina citri OX=121845 GN=LOC103504940 PE=4 SV=1	2	2	2	2	16.9	26.666	107420	148140	106910	19240	61313	63105	Quantified	GO:0048037(MF:cofactor binding)				PF13883(Pyridoxamine 5'-phosphate oxidase)
A0A1S3CTH5	Peptidyl-prolyl cis-trans isomerase	LOC103504931		tr|A0A1S3CTH5|A0A1S3CTH5_DIACI	tr|A0A1S3CTH5|A0A1S3CTH5_DIACI Peptidyl-prolyl cis-trans isomerase OS=Diaphorina citri OX=121845 GN=LOC103504931 PE=4 SV=1	1	4	4	4	47.8	17.625	373970	477650	420620	106070	357310	343350	Quantified	GO:0003755(MF:peptidyl-prolyl cis-trans isomerase activity)				PF00397(WW domain);PF00639(PPIC-type PPIASE domain)
A0A1S3CTH6	Uncharacterized protein LOC103504956 isoform X1	LOC103504956		tr|A0A1S3CTH6|A0A1S3CTH6_DIACI	tr|A0A1S3CTH6|A0A1S3CTH6_DIACI Uncharacterized protein LOC103504956 isoform X1 OS=Diaphorina citri OX=121845 GN=LOC103504956 PE=4 SV=2	1	2	2	2	19.9	16.327	45802	216220	215030	5912.5	41619	29254	Quantified
A0A1S3CTI2	26S proteasome non-ATPase regulatory subunit 11 isoform X1	LOC103504959		tr|A0A1S3CTI2|A0A1S3CTI2_DIACI	tr|A0A1S3CTI2|A0A1S3CTI2_DIACI 26S proteasome non-ATPase regulatory subunit 11 isoform X1 OS=Diaphorina citri OX=121845 GN=LOC103504959 PE=3 SV=1	1	13	13	13	40.9	46.936	659790	788460	667220	858380	734190	820330	Quantified	GO:0043248(BP:proteasome assembly);GO:0000502(CC:proteasome complex)				PF01399(PCI domain)
A0A1S4E686	Oligosaccharyltransferase complex subunit	LOC103504992	FUNCTION: Subunit of the oligosaccharyl transferase (OST) complex that catalyzes the initial transfer of a defined glycan (Glc(3)Man(9)GlcNAc(2) in eukaryotes) from the lipid carrier dolichol-pyrophosphate to an asparagine residue within an Asn-X-Ser/Thr consensus motif in nascent polypeptide chains, the first step in protein N-glycosylation. N-glycosylation occurs cotranslationally and the compl…	tr|A0A1S4E686|A0A1S4E686_DIACI;tr|A0A1S3CTK3|A0A1S3CTK3_DIACI	tr|A0A1S4E686|A0A1S4E686_DIACI Oligosaccharyltransferase complex subunit OS=Diaphorina citri OX=121845 GN=LOC103504992 PE=3 SV=1;tr|A0A1S3CTK3|A0A1S3CTK3_DIACI Oligosaccharyltransferase complex subunit OS=Diaphorina citri OX=121845 GN=LOC103504992 PE=3 SV=	2	1	1	1	12.5	16.031	1604	10270	12192		18448		Quantified	GO:0006486(BP:protein glycosylation);GO:0016021(CC:integral component of membrane);GO:0008250(CC:oligosaccharyltransferase complex);GO:0016740(MF:transferase activity)			Membrane;Multi-pass membrane protein	PF04756(OST3 / OST6 family, transporter family)
A0A1S3CTK5	V-type proton ATPase subunit H	LOC103504881	FUNCTION: Subunit of the peripheral V1 complex of vacuolar ATPase. Subunit H activates ATPase activity of the enzyme and couples ATPase activity to proton flow. Vacuolar ATPase is responsible for acidifying a variety of intracellular compartments in eukaryotic cells, thus providing most of the energy required for transport processes in the vacuolar system. {ECO:0000256|PIRNR:PIRNR032184}.	tr|A0A1S3CTK5|A0A1S3CTK5_DIACI	tr|A0A1S3CTK5|A0A1S3CTK5_DIACI V-type proton ATPase subunit H OS=Diaphorina citri OX=121845 GN=LOC103504881 PE=3 SV=1	1	21	21	21	53.9	56.06	3273800	3230300	3474500	5036600	3548100	3637300	Quantified	GO:0000221(CC:vacuolar proton-transporting V-type ATPase, V1 domain);GO:0046961(MF:proton-transporting ATPase activity, rotational mechanism)				PF03224(V-ATPase subunit H);PF11698(V-ATPase subunit H)
A0A1S3CTN3	Coatomer subunit alpha-like	LOC103504929		tr|A0A1S3CTN3|A0A1S3CTN3_DIACI	tr|A0A1S3CTN3|A0A1S3CTN3_DIACI Coatomer subunit alpha-like OS=Diaphorina citri OX=121845 GN=LOC103504929 PE=4 SV=1	1	1	1	1	20.2	10.002	23378	42265	43669	49392	44177	63354	Quantified	GO:0006886(BP:intracellular protein transport);GO:0016192(BP:vesicle-mediated transport);GO:0030126(CC:COPI vesicle coat);GO:0005198(MF:structural molecule activity)				PF06957(Coatomer (COPI) alpha subunit C-terminus)
A0A1S3CTP4	Glutaredoxin-C3 isoform X3	LOC103505055		tr|A0A1S3CTP4|A0A1S3CTP4_DIACI;tr|A0A3Q0IJ42|A0A3Q0IJ42_DIACI;tr|A0A1S4E6Y1|A0A1S4E6Y1_DIACI;tr|A0A1S4E6Y6|A0A1S4E6Y6_DIACI	tr|A0A1S3CTP4|A0A1S3CTP4_DIACI Glutaredoxin-C3 isoform X3 OS=Diaphorina citri OX=121845 GN=LOC103505055 PE=4 SV=1;tr|A0A3Q0IJ42|A0A3Q0IJ42_DIACI Glutaredoxin-C4 isoform X2 OS=Diaphorina citri OX=121845 GN=LOC103505055 PE=4 SV=1;tr|A0A1S4E6Y1|A0A1S4E6Y1_DIA	4	3	3	3	35	11.142	303500	574490	480390	654550	1678200	1651900	Quantified	GO:0045454(BP:cell redox homeostasis);GO:0005623(CC:cell);GO:0009055(MF:electron transfer activity);GO:0015035(MF:protein disulfide oxidoreductase activity)				PF00462(Glutaredoxin)
A0A1S3CTP8	Kinase	LOC103505053		tr|A0A1S3CTP8|A0A1S3CTP8_DIACI	tr|A0A1S3CTP8|A0A1S3CTP8_DIACI Kinase OS=Diaphorina citri OX=121845 GN=LOC103505053 PE=3 SV=1	1	3	3	3	18.8	32.323	120290	154680	137270	134390	135370	122940	Quantified	GO:0032958(BP:inositol phosphate biosynthetic process);GO:0016301(MF:kinase activity)				PF03770(Inositol polyphosphate kinase)
A0A1S3CTQ6	Uncharacterized protein LOC103504975	LOC103504975		tr|A0A1S3CTQ6|A0A1S3CTQ6_DIACI;tr|A0A1S3DRI4|A0A1S3DRI4_DIACI	tr|A0A1S3CTQ6|A0A1S3CTQ6_DIACI Uncharacterized protein LOC103504975 OS=Diaphorina citri OX=121845 GN=LOC103504975 PE=4 SV=1;tr|A0A1S3DRI4|A0A1S3DRI4_DIACI Uncharacterized protein LOC103523069 OS=Diaphorina citri OX=121845 GN=LOC103523069 PE=4 SV=2	2	2	2	2	11.6	23.567	93078	30639	48390	19303	9368.5	23404	Quantified
A0A1S3CTQ9	Aminomethyltransferase, mitochondrial-like	LOC103505081		tr|A0A1S3CTQ9|A0A1S3CTQ9_DIACI	tr|A0A1S3CTQ9|A0A1S3CTQ9_DIACI Aminomethyltransferase, mitochondrial-like OS=Diaphorina citri OX=121845 GN=LOC103505081 PE=4 SV=2	1	3	3	3	29.9	16.082	172640	129500	207770	157770	220060	232810	Quantified	GO:0032259(BP:methylation);GO:0008168(MF:methyltransferase activity)				PF08669(Glycine cleavage T-protein C-terminal barrel domain)
A0A1S3CTS2	Eukaryotic translation initiation factor 3 subunit K	LOC103505096	FUNCTION: Component of the eukaryotic translation initiation factor 3 (eIF-3) complex, which is involved in protein synthesis of a specialized repertoire of mRNAs and, together with other initiation factors, stimulates binding of mRNA and methionyl-tRNAi to the 40S ribosome. The eIF-3 complex specifically targets and initiates translation of a subset of mRNAs involved in cell proliferation. {ECO:…	tr|A0A1S3CTS2|A0A1S3CTS2_DIACI	tr|A0A1S3CTS2|A0A1S3CTS2_DIACI Eukaryotic translation initiation factor 3 subunit K OS=Diaphorina citri OX=121845 GN=LOC103505096 PE=3 SV=1	1	11	11	11	77.4	25.187	484210	710130	719580	1250800	887740	1009600	Quantified	GO:0001732(BP:formation of cytoplasmic translation initiation complex);GO:0006446(BP:regulation of translational initiation);GO:0016282(CC:eukaryotic 43S preinitiation complex);GO:0033290(CC:eukaryotic 48S preinitiation complex);GO:0005852(CC:eukaryotic translation initiation factor 3 complex);GO:0043022(MF:ribosome binding);GO:0003743(MF:translation initiation factor activity)			Cytoplasm	PF10075(CSN8/PSMD8/EIF3K family)
A0A1S3CTT7	Complex III assembly factor LYRM7	LOC103505116		tr|A0A1S3CTT7|A0A1S3CTT7_DIACI	tr|A0A1S3CTT7|A0A1S3CTT7_DIACI Complex III assembly factor LYRM7 OS=Diaphorina citri OX=121845 GN=LOC103505116 PE=4 SV=1	1	2	2	2	26	13.98	67508	59214	55899	93555	104350	91080	Quantified				Mitochondrion matrix	PF05347(Complex 1 protein (LYR family))
A0A1S3CTU5	Tumor susceptibility gene 101 protein	LOC103505134		tr|A0A1S3CTU5|A0A1S3CTU5_DIACI;tr|A0A1S3DQ08|A0A1S3DQ08_DIACI	tr|A0A1S3CTU5|A0A1S3CTU5_DIACI Tumor susceptibility gene 101 protein OS=Diaphorina citri OX=121845 GN=LOC103505134 PE=3 SV=1;tr|A0A1S3DQ08|A0A1S3DQ08_DIACI Tumor susceptibility gene 101 protein-like OS=Diaphorina citri OX=121845 GN=LOC103521931 PE=4 SV=1	2	3	3	3	12.7	38.479	171500	153640	205890	75688	121350	41359	Quantified	GO:0006464(BP:cellular protein modification process);GO:0015031(BP:protein transport)				PF05743(UEV domain);PF09454(Vps23 core domain)
A0A1S3CTV4	Farnesoate epoxidase-like	LOC103505155		tr|A0A1S3CTV4|A0A1S3CTV4_DIACI	tr|A0A1S3CTV4|A0A1S3CTV4_DIACI Farnesoate epoxidase-like OS=Diaphorina citri OX=121845 GN=LOC103505155 PE=3 SV=1	1	4	3	3	47.3	16.083	94542	67386	109430	50520	10190	318360	Quantified	GO:0020037(MF:heme binding);GO:0005506(MF:iron ion binding);GO:0016705(MF:oxidoreductase activity, acting on paired donors, with incorporation or reduction of molecular oxygen)				PF00067(Cytochrome P450)
A0A3Q0IJK0	Uncharacterized protein LOC103505149 isoform X1	LOC103505149		tr|A0A3Q0IJK0|A0A3Q0IJK0_DIACI;tr|A0A1S3CTV5|A0A1S3CTV5_DIACI	tr|A0A3Q0IJK0|A0A3Q0IJK0_DIACI Uncharacterized protein LOC103505149 isoform X1 OS=Diaphorina citri OX=121845 GN=LOC103505149 PE=4 SV=1;tr|A0A1S3CTV5|A0A1S3CTV5_DIACI Uncharacterized protein LOC103505149 isoform X3 OS=Diaphorina citri OX=121845 GN=LOC103505	2	3	3	3	31.2	13.582	1293700	503150	808990	251970	635080	567180	Quantified
A0A1S3CTW2	Vacuolar protein sorting-associated protein 28 homolog	LOC103505171	FUNCTION: Component of the ESCRT-I complex (endosomal sorting complex required for transport I), a regulator of vesicular trafficking process. {ECO:0000256|PIRNR:PIRNR017535}.	tr|A0A1S3CTW2|A0A1S3CTW2_DIACI	tr|A0A1S3CTW2|A0A1S3CTW2_DIACI Vacuolar protein sorting-associated protein 28 homolog OS=Diaphorina citri OX=121845 GN=LOC103505171 PE=3 SV=1	1	2	2	2	21.4	23.731	49063	61541	40242	20694	32842	6906.3	Quantified	GO:0043328(BP:protein transport to vacuole involved in ubiquitin-dependent protein catabolic process via the multivesicular body sorting pathway);GO:0000813(CC:ESCRT I complex)				PF03997(VPS28 protein)
A0A1S3CTY6	E3 ubiquitin-protein ligase PPP1R11-like	LOC103505194		tr|A0A1S3CTY6|A0A1S3CTY6_DIACI	tr|A0A1S3CTY6|A0A1S3CTY6_DIACI E3 ubiquitin-protein ligase PPP1R11-like OS=Diaphorina citri OX=121845 GN=LOC103505194 PE=4 SV=1	1	1	1	1	27.3	12.406	31228	34955	42714	36560	23946	22161	Quantified	GO:0016874(MF:ligase activity);GO:0004865(MF:protein serine/threonine phosphatase inhibitor activity)				PF07491(Protein phosphatase inhibitor)
A0A1S3CU24	Coiled-coil domain-containing protein 43	LOC103505259		tr|A0A1S3CU24|A0A1S3CU24_DIACI	tr|A0A1S3CU24|A0A1S3CU24_DIACI Coiled-coil domain-containing protein 43 OS=Diaphorina citri OX=121845 GN=LOC103505259 PE=3 SV=1	1	1	1	1	7.1	23.82	8420.7	33459	8959.5	6322.5	11149	10824	Quantified
A0A3Q0IJR1	Thyroid receptor-interacting protein 11 isoform X1	LOC103505263		tr|A0A3Q0IJR1|A0A3Q0IJR1_DIACI;tr|A0A1S3CU25|A0A1S3CU25_DIACI;tr|A0A3Q0JJJ1|A0A3Q0JJJ1_DIACI	tr|A0A3Q0IJR1|A0A3Q0IJR1_DIACI Thyroid receptor-interacting protein 11 isoform X1 OS=Diaphorina citri OX=121845 GN=LOC103505263 PE=4 SV=1;tr|A0A1S3CU25|A0A1S3CU25_DIACI Thyroid receptor-interacting protein 11 isoform X2 OS=Diaphorina citri OX=121845 GN=LOC	3	7	7	7	5.1	214.91	125960	134460	55128	115100	166780	107000	Quantified
A0A1S3CU39	Uncharacterized protein LOC103505283	LOC103505283		tr|A0A1S3CU39|A0A1S3CU39_DIACI	tr|A0A1S3CU39|A0A1S3CU39_DIACI Uncharacterized protein LOC103505283 OS=Diaphorina citri OX=121845 GN=LOC103505283 PE=4 SV=1	1	1	1	1	14.2	14.035	124990	68365	70871	197410	64285	47557	Quantified					PF12510(Smoothelin cytoskeleton protein)
A0A1S3CU86	RISC-loading complex subunit tarbp2-like	LOC103505389		tr|A0A1S3CU86|A0A1S3CU86_DIACI	tr|A0A1S3CU86|A0A1S3CU86_DIACI RISC-loading complex subunit tarbp2-like OS=Diaphorina citri OX=121845 GN=LOC103505389 PE=4 SV=1	1	5	5	4	25.5	32.228	315430	311420	222690	375310	272620	319990	Quantified	GO:0003723(MF:RNA binding)				PF16482(Staufen C-terminal domain);PF00035(Double-stranded RNA binding motif)
A0A1S3CU87	proteasome endopeptidase complex	LOC103505261		tr|A0A1S3CU87|A0A1S3CU87_DIACI	tr|A0A1S3CU87|A0A1S3CU87_DIACI proteasome endopeptidase complex OS=Diaphorina citri OX=121845 GN=LOC103505261 PE=4 SV=1	1	4	4	4	30	29.193	281050	310580	457570	152950	372530	332090	Quantified	GO:0051603(BP:proteolysis involved in cellular protein catabolic process);GO:0005839(CC:proteasome core complex);GO:0004298(MF:threonine-type endopeptidase activity)			Nucleus	PF12465(Proteasome beta subunits C terminal);PF00227(Proteasome subunit)
A0A1S3CUA1	Molybdenum cofactor synthesis protein cinnamon-like isoform X2	LOC103505408		tr|A0A1S3CUA1|A0A1S3CUA1_DIACI;tr|A0A3Q0IK58|A0A3Q0IK58_DIACI	tr|A0A1S3CUA1|A0A1S3CUA1_DIACI Molybdenum cofactor synthesis protein cinnamon-like isoform X2 OS=Diaphorina citri OX=121845 GN=LOC103505408 PE=3 SV=1;tr|A0A3Q0IK58|A0A3Q0IK58_DIACI Molybdenum cofactor synthesis protein cinnamon-like isoform X1 OS=Diaphorin	2	2	2	2	21.3	18.142	28875	38676	24680	30374	48549	41414	Quantified					PF00994(Probable molybdopterin binding domain)
A0A1S3CUA3	Programmed cell death protein 5 isoform X2	LOC103505406		tr|A0A1S3CUA3|A0A1S3CUA3_DIACI;tr|A0A3Q0IK12|A0A3Q0IK12_DIACI	tr|A0A1S3CUA3|A0A1S3CUA3_DIACI Programmed cell death protein 5 isoform X2 OS=Diaphorina citri OX=121845 GN=LOC103505406 PE=3 SV=1;tr|A0A3Q0IK12|A0A3Q0IK12_DIACI Programmed cell death protein 5 isoform X1 OS=Diaphorina citri OX=121845 GN=LOC103505406 PE=3 S	2	4	4	4	45.5	14.849	214760	217000	166380	227930	164680	160780	Quantified	GO:0003677(MF:DNA binding)				PF01984(Double-stranded DNA-binding domain)
A0A1S3CUB6	Prostatic acid phosphatase	LOC103505300		tr|A0A1S3CUB6|A0A1S3CUB6_DIACI	tr|A0A1S3CUB6|A0A1S3CUB6_DIACI Prostatic acid phosphatase OS=Diaphorina citri OX=121845 GN=LOC103505300 PE=4 SV=1	1	4	4	4	11.9	45.687	273690	257550	113720	162930	263220	173670	Quantified	GO:0016021(CC:integral component of membrane);GO:0003993(MF:acid phosphatase activity)				PF00328(Histidine phosphatase superfamily (branch 2))
A0A1S3CUI2	Protein D3-like	LOC103505535		tr|A0A1S3CUI2|A0A1S3CUI2_DIACI	tr|A0A1S3CUI2|A0A1S3CUI2_DIACI Protein D3-like OS=Diaphorina citri OX=121845 GN=LOC103505535 PE=4 SV=2	1	4	4	4	25.8	24.767	475890	625500	491510	187220	455510	326370	Quantified	GO:0016021(CC:integral component of membrane)				PF01161(Phosphatidylethanolamine-binding protein)
A0A1S3CUJ2	Syntenin-2	LOC103505545		tr|A0A1S3CUJ2|A0A1S3CUJ2_DIACI	tr|A0A1S3CUJ2|A0A1S3CUJ2_DIACI Syntenin-2 OS=Diaphorina citri OX=121845 GN=LOC103505545 PE=4 SV=1	1	1	1	1	2.8	56.913		41709	4917.9	2181.4			Quantified					PF00595(PDZ domain (Also known as DHR or GLGF))
A0A1S3CUJ7	Heterogeneous nuclear ribonucleoprotein C-like	LOC103505555		tr|A0A1S3CUJ7|A0A1S3CUJ7_DIACI	tr|A0A1S3CUJ7|A0A1S3CUJ7_DIACI Heterogeneous nuclear ribonucleoprotein C-like OS=Diaphorina citri OX=121845 GN=LOC103505555 PE=4 SV=1	1	1	1	1	9.8	19.355		17967	2516.6		9130.7		Quantified	GO:0003723(MF:RNA binding)				PF00076(RNA recognition motif. (a.k.a. RRM, RBD, or RNP domain))
A0A1S3CUK5	60S acidic ribosomal protein P0	LOC103505561	FUNCTION: Ribosomal protein P0 is the functional equivalent of E.coli protein L10. {ECO:0000256|PIRNR:PIRNR039087}.	tr|A0A1S3CUK5|A0A1S3CUK5_DIACI;tr|A0A3Q0IK83|A0A3Q0IK83_DIACI	tr|A0A1S3CUK5|A0A1S3CUK5_DIACI 60S acidic ribosomal protein P0 OS=Diaphorina citri OX=121845 GN=LOC103505561 PE=3 SV=1	2	12	12	4	60.8	34.124	4005900	4488100	4492000	5893400	5097800	6711700	Quantified	GO:0042254(BP:ribosome biogenesis);GO:0005840(CC:ribosome)				PF00466(Ribosomal protein L10);PF00428(60s Acidic ribosomal protein)
A0A1S3CUK6	Apoptosis inhibitor 5-like	LOC103505580		tr|A0A1S3CUK6|A0A1S3CUK6_DIACI	tr|A0A1S3CUK6|A0A1S3CUK6_DIACI Apoptosis inhibitor 5-like OS=Diaphorina citri OX=121845 GN=LOC103505580 PE=3 SV=1	1	2	2	1	5.6	44.368	23530	80834	38511	20387	2311.4	74361	Quantified					PF05918(Apoptosis inhibitory protein 5 (API5))
A0A1S3CUL3	Short-chain dehydrogenase/reductase family 16C member 6-like	LOC103504832		tr|A0A1S3CUL3|A0A1S3CUL3_DIACI	tr|A0A1S3CUL3|A0A1S3CUL3_DIACI Short-chain dehydrogenase/reductase family 16C member 6-like OS=Diaphorina citri OX=121845 GN=LOC103504832 PE=3 SV=1	1	1	1	1	7	25.582		17015				16749	Identified	GO:0016491(MF:oxidoreductase activity)	K00059(NA)	ko00061(Fatty acid biosynthesis);ko00333(Prodigiosin biosynthesis);ko00780(Biotin metabolism);ko01240(Biosynthesis of cofactors)		PF00106(short chain dehydrogenase)
A0A1S3CUM0	Echinoderm microtubule-associated protein-like 2 isoform X3	LOC103505583		tr|A0A1S3CUM0|A0A1S3CUM0_DIACI;tr|A0A1S3CUL7|A0A1S3CUL7_DIACI;tr|A0A1S3CVX6|A0A1S3CVX6_DIACI	tr|A0A1S3CUM0|A0A1S3CUM0_DIACI Echinoderm microtubule-associated protein-like 2 isoform X3 OS=Diaphorina citri OX=121845 GN=LOC103505583 PE=3 SV=1;tr|A0A1S3CUL7|A0A1S3CUL7_DIACI Echinoderm microtubule-associated protein-like 2 isoform X2 OS=Diaphorina citr	3	12	12	12	21.2	94.129	437530	592100	651510	434650	681740	525360	Quantified					PF00400(WD domain, G-beta repeat);PF03451(HELP motif)
A0A1S3CUM1	Stathmin	LOC103505590		tr|A0A1S3CUM1|A0A1S3CUM1_DIACI;tr|A0A1S3CUM8|A0A1S3CUM8_DIACI	tr|A0A1S3CUM1|A0A1S3CUM1_DIACI Stathmin OS=Diaphorina citri OX=121845 GN=LOC103505590 PE=3 SV=1;tr|A0A1S3CUM8|A0A1S3CUM8_DIACI Stathmin-1-A isoform X1 OS=Diaphorina citri OX=121845 GN=LOC103505590 PE=4 SV=1	2	3	3	3	22.6	17.521	473530	66553	143730	378490	131960	269040	Quantified	GO:0031110(BP:regulation of microtubule polymerization or depolymerization)				PF00836(Stathmin family)
A0A1S3CUM4	Abl interactor 2	LOC103505586		tr|A0A1S3CUM4|A0A1S3CUM4_DIACI	tr|A0A1S3CUM4|A0A1S3CUM4_DIACI Abl interactor 2 OS=Diaphorina citri OX=121845 GN=LOC103505586 PE=3 SV=1	1	2	2	2	6	49.733	83558	73286	33347	51757	97513	69859	Quantified	GO:0008154(BP:actin polymerization or depolymerization)				PF07815(Abl-interactor HHR);PF14604(Variant SH3 domain)
A0A1S3CUN8	Annexin	LOC103505600		tr|A0A1S3CUN8|A0A1S3CUN8_DIACI;tr|A0A1S3D169|A0A1S3D169_DIACI;tr|A0A1S3CZT9|A0A1S3CZT9_DIACI	tr|A0A1S3CUN8|A0A1S3CUN8_DIACI Annexin OS=Diaphorina citri OX=121845 GN=LOC103505600 PE=3 SV=1	3	13	12	9	52.4	37.372	8312100	6622600	5657600	6964300	5566400	5836600	Quantified	GO:0005509(MF:calcium ion binding);GO:0005544(MF:calcium-dependent phospholipid binding)				PF00191(Annexin)
A0A1S3CUP2	pyridoxal 5-phosphate synthase	LOC103505604		tr|A0A1S3CUP2|A0A1S3CUP2_DIACI	tr|A0A1S3CUP2|A0A1S3CUP2_DIACI pyridoxal 5-phosphate synthase OS=Diaphorina citri OX=121845 GN=LOC103505604 PE=3 SV=1	1	3	3	3	20.7	30.183	181540	161460	131650	19506	1139.1	9341.9	Quantified	GO:0008615(BP:pyridoxine biosynthetic process);GO:0010181(MF:FMN binding);GO:0004733(MF:pyridoxamine-phosphate oxidase activity)	K00275(NA)	ko00750(Vitamin B6 metabolism);ko01240(Biosynthesis of cofactors)		PF01243(Pyridoxamine 5'-phosphate oxidase);PF10590(Pyridoxine 5'-phosphate oxidase C-terminal dimerisation region)
A0A1S3CUP6	Uncharacterized protein C1683.06c-like	LOC103504892		tr|A0A1S3CUP6|A0A1S3CUP6_DIACI;tr|A0A1S3DQJ0|A0A1S3DQJ0_DIACI	tr|A0A1S3CUP6|A0A1S3CUP6_DIACI Uncharacterized protein C1683.06c-like OS=Diaphorina citri OX=121845 GN=LOC103504892 PE=3 SV=1;tr|A0A1S3DQJ0|A0A1S3DQJ0_DIACI Inosine-uridine preferring nucleoside hydrolase-like OS=Diaphorina citri OX=121845 GN=LOC103522195	2	2	2	2	8.6	35.925	13759	94865	28269	24310	12706	18695	Quantified					PF01156(Inosine-uridine preferring nucleoside hydrolase)
A0A1S3CUQ7	Guanine nucleotide-binding protein G(S) subunit alpha isoform X1	LOC103505624		tr|A0A1S3CUQ7|A0A1S3CUQ7_DIACI;tr|A0A1S4E720|A0A1S4E720_DIACI;tr|A0A3Q0IP34|A0A3Q0IP34_DIACI	tr|A0A1S3CUQ7|A0A1S3CUQ7_DIACI Guanine nucleotide-binding protein G(S) subunit alpha isoform X1 OS=Diaphorina citri OX=121845 GN=LOC103505624 PE=3 SV=1;tr|A0A1S4E720|A0A1S4E720_DIACI Guanine nucleotide-binding protein G(S) subunit alpha isoform X2 OS=Diaph	3	8	8	8	30.9	44.3	363370	363070	406820	614910	371800	381790	Quantified	GO:0007186(BP:G protein-coupled receptor signaling pathway);GO:0031683(MF:G-protein beta/gamma-subunit complex binding);GO:0005525(MF:GTP binding);GO:0003924(MF:GTPase activity)				PF00503(G-protein alpha subunit)
A0A1S3CW28	Cytochrome c oxidase subunit 4	LOC103505632		tr|A0A1S3CW28|A0A1S3CW28_DIACI;tr|A0A1S3CUR7|A0A1S3CUR7_DIACI;tr|A0A1S3CUR6|A0A1S3CUR6_DIACI	tr|A0A1S3CW28|A0A1S3CW28_DIACI Cytochrome c oxidase subunit 4 OS=Diaphorina citri OX=121845 GN=LOC103505632 PE=3 SV=1;tr|A0A1S3CUR7|A0A1S3CUR7_DIACI Cytochrome c oxidase subunit 4 OS=Diaphorina citri OX=121845 GN=LOC103505633 PE=3 SV=1;tr|A0A1S3CUR6|A0A1S3	3	2	2	2	12.4	26.195		36274	66286	52339	57996	58279	Quantified	GO:0016021(CC:integral component of membrane);GO:0004129(MF:cytochrome-c oxidase activity)			Mitochondrion inner membrane;Single-pass membrane protein	PF02936(Cytochrome c oxidase subunit IV)
A0A1S3DEP1	glutathione transferase	LOC103516914		tr|A0A1S3DEP1|A0A1S3DEP1_DIACI;tr|A0A1S3CUR9|A0A1S3CUR9_DIACI	tr|A0A1S3DEP1|A0A1S3DEP1_DIACI glutathione transferase OS=Diaphorina citri OX=121845 GN=LOC103516914 PE=3 SV=1;tr|A0A1S3CUR9|A0A1S3CUR9_DIACI glutathione transferase OS=Diaphorina citri OX=121845 GN=LOC103505568 PE=3 SV=1	2	1	1	1	7.8	17.66	660370	567580	673860	1057800	625960	563640	Quantified	GO:0016021(CC:integral component of membrane)			Membrane;Multi-pass membrane protein	PF01124(MAPEG family)
A0A1S3CUS1	High mobility group B protein 7-like	LOC103505639		tr|A0A1S3CUS1|A0A1S3CUS1_DIACI	tr|A0A1S3CUS1|A0A1S3CUS1_DIACI High mobility group B protein 7-like OS=Diaphorina citri OX=121845 GN=LOC103505639 PE=4 SV=1	1	3	3	3	26.4	17.407	264750	207570	302000	170780	155660	157890	Quantified	GO:0003677(MF:DNA binding)				PF09011(HMG-box domain)
A0A1S3CUS4	Interferon regulatory factor 2-binding protein-like B	LOC103505582		tr|A0A1S3CUS4|A0A1S3CUS4_DIACI	tr|A0A1S3CUS4|A0A1S3CUS4_DIACI Interferon regulatory factor 2-binding protein-like B OS=Diaphorina citri OX=121845 GN=LOC103505582 PE=3 SV=1	1	1	1	1	2.5	54.914	7166.1	5029.8	4938.3	758780	11489	17125	Quantified				Nucleus	PF11261(Interferon regulatory factor 2-binding protein zinc finger)
A0A1S3CUU7	Beta-ureidopropionase-like	LOC103505681		tr|A0A1S3CUU7|A0A1S3CUU7_DIACI	tr|A0A1S3CUU7|A0A1S3CUU7_DIACI Beta-ureidopropionase-like OS=Diaphorina citri OX=121845 GN=LOC103505681 PE=4 SV=1	1	3	3	3	19.2	33.029	130340	162730	116900	13510	78188	70090	Quantified	GO:0006807(BP:nitrogen compound metabolic process)				PF00795(Carbon-nitrogen hydrolase)
A0A1S3CUV1	Vacuolar protein sorting-associated protein 35	LOC103505696	FUNCTION: Plays a role in vesicular protein sorting. {ECO:0000256|PIRNR:PIRNR009375}.	tr|A0A1S3CUV1|A0A1S3CUV1_DIACI	tr|A0A1S3CUV1|A0A1S3CUV1_DIACI Vacuolar protein sorting-associated protein 35 OS=Diaphorina citri OX=121845 GN=LOC103505696 PE=3 SV=1	1	16	16	16	29.8	90.529	533010	721180	714980	1239300	868700	924070	Quantified	GO:0015031(BP:protein transport);GO:0042147(BP:retrograde transport, endosome to Golgi);GO:0005829(CC:cytosol);GO:0030906(CC:retromer, cargo-selective complex)				PF03635(Vacuolar protein sorting-associated protein 35)
A0A1S3CUV2	Prefoldin subunit 6	LOC103505690		tr|A0A1S3CUV2|A0A1S3CUV2_DIACI	tr|A0A1S3CUV2|A0A1S3CUV2_DIACI Prefoldin subunit 6 OS=Diaphorina citri OX=121845 GN=LOC103505690 PE=3 SV=1	1	3	3	3	27.4	14.688	229430	189990	122020	193150	133850	145420	Quantified	GO:0006457(BP:protein folding);GO:0016272(CC:prefoldin complex);GO:0051082(MF:unfolded protein binding)				PF01920(Prefoldin subunit)
A0A1S3DK33	Splicing factor U2af 38 kDa subunit	LOC103520222		tr|A0A1S3DK33|A0A1S3DK33_DIACI;tr|A0A1S3CUW1|A0A1S3CUW1_DIACI;tr|A0A1S3D5B4|A0A1S3D5B4_DIACI	tr|A0A1S3DK33|A0A1S3DK33_DIACI Splicing factor U2af 38 kDa subunit OS=Diaphorina citri OX=121845 GN=LOC103520222 PE=4 SV=1;tr|A0A1S3CUW1|A0A1S3CUW1_DIACI Splicing factor U2af 38 kDa subunit-like OS=Diaphorina citri OX=121845 GN=LOC103505713 PE=4 SV=1;tr|A0	3	2	2	2	12.8	27.551	34692	38299	47812		58378	40780	Quantified	GO:0000398(BP:mRNA splicing, via spliceosome);GO:0089701(CC:U2AF);GO:0046872(MF:metal ion binding);GO:0003723(MF:RNA binding)				PF00642(Zinc finger C-x8-C-x5-C-x3-H type (and similar));PF00076(RNA recognition motif. (a.k.a. RRM, RBD, or RNP domain))
A0A1S3CUX3	Ubiquitin-conjugating enzyme E2 variant 2-like	LOC103505008		tr|A0A1S3CUX3|A0A1S3CUX3_DIACI	tr|A0A1S3CUX3|A0A1S3CUX3_DIACI Ubiquitin-conjugating enzyme E2 variant 2-like OS=Diaphorina citri OX=121845 GN=LOC103505008 PE=4 SV=1	1	2	2	2	22.3	11.989	167050	244620	234510	261160	299600	283200	Quantified					PF00179(Ubiquitin-conjugating enzyme)
A0A1S3CUY0	Filamin-A-like	LOC103505729		tr|A0A1S3CUY0|A0A1S3CUY0_DIACI	tr|A0A1S3CUY0|A0A1S3CUY0_DIACI Filamin-A-like OS=Diaphorina citri OX=121845 GN=LOC103505729 PE=3 SV=1	1	1	1	1	10.6	17.053	53476	35958	46277	24814	4263.2	55599	Quantified
A0A1S3CV00	Cathepsin B-like cysteine proteinase 4	LOC103505051		tr|A0A1S3CV00|A0A1S3CV00_DIACI	tr|A0A1S3CV00|A0A1S3CV00_DIACI Cathepsin B-like cysteine proteinase 4 OS=Diaphorina citri OX=121845 GN=LOC103505051 PE=3 SV=1	1	6	6	6	25.4	41.273	81725	194170	185930	141700	241480	327130	Quantified	GO:0050790(BP:regulation of catalytic activity);GO:0004197(MF:cysteine-type endopeptidase activity)				PF08127(Peptidase family C1 propeptide);PF00112(Papain family cysteine protease)
A0A1S4E6B9	Translocation protein SEC63 homolog isoform X1	LOC103505072		tr|A0A1S4E6B9|A0A1S4E6B9_DIACI;tr|A0A1S3CV10|A0A1S3CV10_DIACI	tr|A0A1S4E6B9|A0A1S4E6B9_DIACI Translocation protein SEC63 homolog isoform X1 OS=Diaphorina citri OX=121845 GN=LOC103505072 PE=4 SV=1;tr|A0A1S3CV10|A0A1S3CV10_DIACI Translocation protein SEC63 homolog isoform X2 OS=Diaphorina citri OX=121845 GN=LOC10350507	2	2	2	2	4.8	89.784	23640	25788	5458.3	121890		36265	Quantified	GO:0031204(BP:posttranslational protein targeting to membrane, translocation);GO:0016021(CC:integral component of membrane)			Membrane;Multi-pass membrane protein	PF00226(DnaJ domain);PF02889(Sec63 Brl domain)
A0A1S3CV23	Solute carrier family 2, facilitated glucose transporter member 1 isoform X2	LOC103505775		tr|A0A1S3CV23|A0A1S3CV23_DIACI;tr|A0A1S3CWD1|A0A1S3CWD1_DIACI	tr|A0A1S3CV23|A0A1S3CV23_DIACI Solute carrier family 2, facilitated glucose transporter member 1 isoform X2 OS=Diaphorina citri OX=121845 GN=LOC103505775 PE=3 SV=1;tr|A0A1S3CWD1|A0A1S3CWD1_DIACI Solute carrier family 2, facilitated glucose transporter memb	2	3	3	3	9	54.123	86033	108260	89239	164030	121430	134570	Quantified	GO:0008643(BP:carbohydrate transport);GO:0016021(CC:integral component of membrane);GO:0022857(MF:transmembrane transporter activity)				PF00083(Sugar (and other) transporter)
A0A1S3CV42	Cystinosin homolog	LOC103505825		tr|A0A1S3CV42|A0A1S3CV42_DIACI	tr|A0A1S3CV42|A0A1S3CV42_DIACI Cystinosin homolog OS=Diaphorina citri OX=121845 GN=LOC103505825 PE=3 SV=1	1	1	1	1	4.8	37.423	41504	51295	55701	52538	56735	44939	Quantified	GO:0016021(CC:integral component of membrane)			Membrane;Multi-pass membrane protein	PF04193(PQ loop repeat)
A0A1S3CV45	GTP-binding protein 128up-like	LOC103505742		tr|A0A1S3CV45|A0A1S3CV45_DIACI	tr|A0A1S3CV45|A0A1S3CV45_DIACI GTP-binding protein 128up-like OS=Diaphorina citri OX=121845 GN=LOC103505742 PE=4 SV=1	1	4	4	4	21.2	30.913	91926	98439	87133	211070	102780	137630	Quantified	GO:0005525(MF:GTP binding)				PF16897(C-terminal region of MMR_HSR1 domain);PF01926(50S ribosome-binding GTPase)
A0A1S3CV51	Sphingosine-1-phosphate lyase	LOC103505843		tr|A0A1S3CV51|A0A1S3CV51_DIACI	tr|A0A1S3CV51|A0A1S3CV51_DIACI Sphingosine-1-phosphate lyase OS=Diaphorina citri OX=121845 GN=LOC103505843 PE=3 SV=1	1	7	7	7	18.9	62.946	124610	106440	110510	348160	215070	219330	Quantified	GO:0019752(BP:carboxylic acid metabolic process);GO:0016831(MF:carboxy-lyase activity);GO:0030170(MF:pyridoxal phosphate binding)				PF00282(Pyridoxal-dependent decarboxylase conserved domain)
A0A1S3CV53	Glycogen synthase kinase-3 beta-like	LOC103505841		tr|A0A1S3CV53|A0A1S3CV53_DIACI;tr|A0A1S3DPS6|A0A1S3DPS6_DIACI	tr|A0A1S3CV53|A0A1S3CV53_DIACI Glycogen synthase kinase-3 beta-like OS=Diaphorina citri OX=121845 GN=LOC103505841 PE=3 SV=1;tr|A0A1S3DPS6|A0A1S3DPS6_DIACI Glycogen synthase kinase-3-like OS=Diaphorina citri OX=121845 GN=LOC103522575 PE=4 SV=2	2	8	8	8	38.7	36.71	265230	404250	436130	384690	432490	509060	Quantified	GO:0005524(MF:ATP binding);GO:0004672(MF:protein kinase activity)				PF00069(Protein kinase domain)
A0A1S3CV61	Pyrroline-5-carboxylate reductase	LOC103505866		tr|A0A1S3CV61|A0A1S3CV61_DIACI;tr|A0A1S3CV68|A0A1S3CV68_DIACI;tr|A0A1S3CV63|A0A1S3CV63_DIACI	tr|A0A1S3CV61|A0A1S3CV61_DIACI Pyrroline-5-carboxylate reductase OS=Diaphorina citri OX=121845 GN=LOC103505866 PE=3 SV=1;tr|A0A1S3CV68|A0A1S3CV68_DIACI Pyrroline-5-carboxylate reductase OS=Diaphorina citri OX=121845 GN=LOC103505866 PE=3 SV=1;tr|A0A1S3CV63|	3	8	8	8	46.2	31.456	1259800	1510700	1493700	1206400	1539300	1768500	Quantified	GO:0055129(BP:L-proline biosynthetic process);GO:0004735(MF:pyrroline-5-carboxylate reductase activity)				PF14748(Pyrroline-5-carboxylate reductase dimerisation);PF03807(NADP oxidoreductase coenzyme F420-dependent)
A0A1S3CV73	MICOS complex subunit	LOC103505869	FUNCTION: Component of the MICOS complex, a large protein complex of the mitochondrial inner membrane that plays crucial roles in the maintenance of crista junctions, inner membrane architecture, and formation of contact sites to the outer membrane. {ECO:0000256|RuleBase:RU363021}.	tr|A0A1S3CV73|A0A1S3CV73_DIACI;tr|A0A1S3CV66|A0A1S3CV66_DIACI	tr|A0A1S3CV73|A0A1S3CV73_DIACI MICOS complex subunit OS=Diaphorina citri OX=121845 GN=LOC103505869 PE=3 SV=1;tr|A0A1S3CV66|A0A1S3CV66_DIACI MICOS complex subunit OS=Diaphorina citri OX=121845 GN=LOC103505869 PE=3 SV=1	2	13	13	13	72.8	26.694	2011700	1907400	2033500	3521400	2545400	2516400	Quantified	GO:0042407(BP:cristae formation);GO:0061617(CC:MICOS complex)			Mitochondrion inner membrane	PF09769(Apolipoprotein O)
A0A1S3CV85	inorganic diphosphatase	LOC103505878		tr|A0A1S3CV85|A0A1S3CV85_DIACI	tr|A0A1S3CV85|A0A1S3CV85_DIACI inorganic diphosphatase OS=Diaphorina citri OX=121845 GN=LOC103505878 PE=3 SV=1	1	11	11	11	60.7	30.92	10751000	8913700	6814800	10898000	7821600	7965300	Quantified	GO:0006796(BP:phosphate-containing compound metabolic process);GO:0005737(CC:cytoplasm);GO:0004427(MF:inorganic diphosphatase activity);GO:0000287(MF:magnesium ion binding)	K01507(NA)	ko00190(Oxidative phosphorylation)		PF00719(Inorganic pyrophosphatase)
A0A1S3CV89	LOW QUALITY PROTEIN: uncharacterized protein LOC103505908	LOC103505908		tr|A0A1S3CV89|A0A1S3CV89_DIACI	tr|A0A1S3CV89|A0A1S3CV89_DIACI LOW QUALITY PROTEIN: uncharacterized protein LOC103505908 OS=Diaphorina citri OX=121845 GN=LOC103505908 PE=4 SV=2	1	1	1	1	1	121.32	875710	62871	1200200	4176000	1969000	114050	Quantified
A0A1S3CVB6	Glutathione peroxidase	LOC103505868		tr|A0A1S3CVB6|A0A1S3CVB6_DIACI	tr|A0A1S3CVB6|A0A1S3CVB6_DIACI Glutathione peroxidase OS=Diaphorina citri OX=121845 GN=LOC103505868 PE=3 SV=1	1	6	6	6	50	18.786	840530	949110	852950	1649800	1077500	1202500	Quantified	GO:0006979(BP:response to oxidative stress);GO:0004602(MF:glutathione peroxidase activity)				PF00255(Glutathione peroxidase)
A0A1S3CVD4	ATP-binding cassette sub-family F member 2	LOC103505241		tr|A0A1S3CVD4|A0A1S3CVD4_DIACI	tr|A0A1S3CVD4|A0A1S3CVD4_DIACI ATP-binding cassette sub-family F member 2 OS=Diaphorina citri OX=121845 GN=LOC103505241 PE=2 SV=1	1	10	10	10	22.6	71.085	437260	524850	610280	1241600	1039200	1205100	Quantified	GO:0005524(MF:ATP binding);GO:0016887(MF:ATPase activity)	K02065(NA)	ko02010(ABC transporters)		PF12848(ABC transporter);PF00005(ABC transporter)
A0A1S3D7J2	Testis-specific serine/threonine-protein kinase 3-like	LOC103512965		tr|A0A1S3D7J2|A0A1S3D7J2_DIACI;tr|A0A1S3CVF1|A0A1S3CVF1_DIACI	tr|A0A1S3D7J2|A0A1S3D7J2_DIACI Testis-specific serine/threonine-protein kinase 3-like OS=Diaphorina citri OX=121845 GN=LOC103512965 PE=3 SV=1;tr|A0A1S3CVF1|A0A1S3CVF1_DIACI Testis-specific serine/threonine-protein kinase 4-like OS=Diaphorina citri OX=12184	2	1	1	1	2.8	39.945	18195	13239	19999		12317	11845	Quantified	GO:0005524(MF:ATP binding);GO:0004674(MF:protein serine/threonine kinase activity)				PF00069(Protein kinase domain)
A0A1S3CVH1	Uncharacterized protein LOC103505958	LOC103505958		tr|A0A1S3CVH1|A0A1S3CVH1_DIACI	tr|A0A1S3CVH1|A0A1S3CVH1_DIACI Uncharacterized protein LOC103505958 OS=Diaphorina citri OX=121845 GN=LOC103505958 PE=4 SV=1	1	8	8	8	38.5	30.255	5381200	3993300	3412900	6677000	4234600	4225400	Quantified	GO:0045454(BP:cell redox homeostasis);GO:0005623(CC:cell)				PF00085(Thioredoxin)
A0A1S3CVH5	HIG1 domain family member 2A, mitochondrial isoform X1	LOC103506066		tr|A0A1S3CVH5|A0A1S3CVH5_DIACI	tr|A0A1S3CVH5|A0A1S3CVH5_DIACI HIG1 domain family member 2A, mitochondrial isoform X1 OS=Diaphorina citri OX=121845 GN=LOC103506066 PE=4 SV=1	1	2	2	2	31.7	11.618	323370	101710	25053	803300	369930	460980	Quantified	GO:0016021(CC:integral component of membrane)				PF04588(Hypoxia induced protein conserved region)
A0A1S3CVI1	60S ribosomal protein L21	LOC103505979		tr|A0A1S3CVI1|A0A1S3CVI1_DIACI	tr|A0A1S3CVI1|A0A1S3CVI1_DIACI 60S ribosomal protein L21 OS=Diaphorina citri OX=121845 GN=LOC103505979 PE=3 SV=1	1	4	1	1	30.8	18.331	195040	267660	272860	693860	458600	431560	Quantified	GO:0006412(BP:translation);GO:0005840(CC:ribosome);GO:0003735(MF:structural constituent of ribosome)				PF01157(Ribosomal protein L21e)
A0A1S3CVJ1	Tubulin beta chain	LOC103506000	FUNCTION: Tubulin is the major constituent of microtubules. It binds two moles of GTP, one at an exchangeable site on the beta chain and one at a non-exchangeable site on the alpha chain. {ECO:0000256|RuleBase:RU000352, ECO:0000256|SAAS:SAAS00031082}.	tr|A0A1S3CVJ1|A0A1S3CVJ1_DIACI	tr|A0A1S3CVJ1|A0A1S3CVJ1_DIACI Tubulin beta chain OS=Diaphorina citri OX=121845 GN=LOC103506000 PE=3 SV=1	1	19	15	14	64.5	50.906	1818300	1925600	3385200	1336800	1694600	1659600	Quantified	GO:0007017(BP:microtubule-based process);GO:0005737(CC:cytoplasm);GO:0005874(CC:microtubule);GO:0005525(MF:GTP binding);GO:0003924(MF:GTPase activity);GO:0005200(MF:structural constituent of cytoskeleton)			Cytoplasm;cytoskeleton	PF03953(Tubulin C-terminal domain);PF00091(Tubulin/FtsZ family, GTPase domain)
A0A1S3CVJ4	Eukaryotic translation initiation factor 4E-binding protein 1	LOC103506044		tr|A0A1S3CVJ4|A0A1S3CVJ4_DIACI	tr|A0A1S3CVJ4|A0A1S3CVJ4_DIACI Eukaryotic translation initiation factor 4E-binding protein 1 OS=Diaphorina citri OX=121845 GN=LOC103506044 PE=3 SV=1	1	4	4	4	58.2	11.931	135160	81400	61641	103410	135010	89122	Quantified	GO:0045947(BP:negative regulation of translational initiation);GO:0008190(MF:eukaryotic initiation factor 4E binding);GO:0003743(MF:translation initiation factor activity)				PF05456(Eukaryotic translation initiation factor 4E binding protein (EIF4EBP))
A0A1S3CVK8	C-terminal-binding protein isoform X3	LOC103506120		tr|A0A1S3CVK8|A0A1S3CVK8_DIACI;tr|A0A1S3CWX9|A0A1S3CWX9_DIACI;tr|A0A1S3CVR8|A0A1S3CVR8_DIACI	tr|A0A1S3CVK8|A0A1S3CVK8_DIACI C-terminal-binding protein isoform X3 OS=Diaphorina citri OX=121845 GN=LOC103506120 PE=3 SV=1;tr|A0A1S3CWX9|A0A1S3CWX9_DIACI C-terminal-binding protein isoform X2 OS=Diaphorina citri OX=121845 GN=LOC103506120 PE=3 SV=1;tr|A0A	3	4	4	4	13.1	52.118	75581	186830	198310	228060	131240	176930	Quantified	GO:0051287(MF:NAD binding);GO:0016616(MF:oxidoreductase activity, acting on the CH-OH group of donors, NAD or NADP as acceptor)			Nucleus	PF00389(D-isomer specific 2-hydroxyacid dehydrogenase, catalytic domain);PF02826(D-isomer specific 2-hydroxyacid dehydrogenase, NAD binding domain)
A0A1S3CVL6	Leucine-rich repeat-containing protein 71-like	LOC103505403		tr|A0A1S3CVL6|A0A1S3CVL6_DIACI	tr|A0A1S3CVL6|A0A1S3CVL6_DIACI Leucine-rich repeat-containing protein 71-like OS=Diaphorina citri OX=121845 GN=LOC103505403 PE=4 SV=1	1	1	1	1	2.4	56.929	31087						Identified					PF13516(Leucine Rich repeat)
A0A1S3CVN0	BAG family molecular chaperone regulator 2	LOC103506121		tr|A0A1S3CVN0|A0A1S3CVN0_DIACI	tr|A0A1S3CVN0|A0A1S3CVN0_DIACI BAG family molecular chaperone regulator 2 OS=Diaphorina citri OX=121845 GN=LOC103506121 PE=4 SV=1	1	6	6	6	45.9	22.253	200540	304520	188430	187850	205070	168040	Quantified	GO:0000774(MF:adenyl-nucleotide exchange factor activity);GO:0051087(MF:chaperone binding)
A0A1S3D3P8	Small ribosomal subunit protein bS16m	LOC103510815		tr|A0A1S3D3P8|A0A1S3D3P8_DIACI;tr|A0A1S3CVN1|A0A1S3CVN1_DIACI	tr|A0A1S3D3P8|A0A1S3D3P8_DIACI Small ribosomal subunit protein bS16m OS=Diaphorina citri OX=121845 GN=LOC103510815 PE=3 SV=1;tr|A0A1S3CVN1|A0A1S3CVN1_DIACI Small ribosomal subunit protein bS16m OS=Diaphorina citri OX=121845 GN=LOC103506107 PE=3 SV=1	2	3	3	3	32.2	16.897	35173	41724	45155	63683	67930	58028	Quantified	GO:0006412(BP:translation);GO:0005840(CC:ribosome);GO:0003735(MF:structural constituent of ribosome)	K02959(NA)	ko03010(Ribosome)		PF00886(Ribosomal protein S16)
A0A1S3CVN3	Glycerol-3-phosphate phosphatase	LOC103506152		tr|A0A1S3CVN3|A0A1S3CVN3_DIACI	tr|A0A1S3CVN3|A0A1S3CVN3_DIACI Glycerol-3-phosphate phosphatase OS=Diaphorina citri OX=121845 GN=LOC103506152 PE=3 SV=1	1	3	3	3	18.1	33.884	376520	273780	271440	304240	315900	342870	Quantified	GO:0016791(MF:phosphatase activity)				PF13344(Haloacid dehalogenase-like hydrolase);PF13242(HAD-hyrolase-like)
A0A1S3CVN5	Cuticle protein 7-like	LOC103506128		tr|A0A1S3CVN5|A0A1S3CVN5_DIACI	tr|A0A1S3CVN5|A0A1S3CVN5_DIACI Cuticle protein 7-like OS=Diaphorina citri OX=121845 GN=LOC103506128 PE=4 SV=1	1	2	2	2	25.8	16.181	415450	684220	594850	586910	210860	332440	Quantified	GO:0042302(MF:structural constituent of cuticle)				PF00379(Insect cuticle protein)
A0A1S4E825	Protein TFG isoform X2	LOC103506133		tr|A0A1S4E825|A0A1S4E825_DIACI;tr|A0A1S3CVP0|A0A1S3CVP0_DIACI	tr|A0A1S4E825|A0A1S4E825_DIACI Protein TFG isoform X2 OS=Diaphorina citri OX=121845 GN=LOC103506133 PE=4 SV=1;tr|A0A1S3CVP0|A0A1S3CVP0_DIACI Protein TFG isoform X1 OS=Diaphorina citri OX=121845 GN=LOC103506133 PE=4 SV=1	2	3	3	3	20.1	36.939	49025	94003	97987	73041	19073	97232	Quantified	GO:0048208(BP:COPII vesicle coating);GO:0000139(CC:Golgi membrane);GO:0042802(MF:identical protein binding)				PF00564(PB1 domain)
A0A1S3CX13	Carboxylic ester hydrolase	LOC103506174		tr|A0A1S3CX13|A0A1S3CX13_DIACI;tr|A0A1S3CVP2|A0A1S3CVP2_DIACI;tr|A0A1S3DJM7|A0A1S3DJM7_DIACI	tr|A0A1S3CX13|A0A1S3CX13_DIACI Carboxylic ester hydrolase OS=Diaphorina citri OX=121845 GN=LOC103506174 PE=3 SV=1;tr|A0A1S3CVP2|A0A1S3CVP2_DIACI Carboxylic ester hydrolase OS=Diaphorina citri OX=121845 GN=LOC103506174 PE=3 SV=1	3	17	17	17	51.7	61.724	2042500	2135900	2429800	1273400	1553900	1008300	Quantified	GO:0016787(MF:hydrolase activity)				PF00135(Carboxylesterase family)
A0A1S3CVP9	Actin, muscle isoform X1	LOC103506086		tr|A0A1S3CVP9|A0A1S3CVP9_DIACI;tr|A0A3Q0ILA9|A0A3Q0ILA9_DIACI;tr|A0A3Q0IWK8|A0A3Q0IWK8_DIACI;tr|A0A3Q0IRS7|A0A3Q0IRS7_DIACI	tr|A0A1S3CVP9|A0A1S3CVP9_DIACI Actin, muscle isoform X1 OS=Diaphorina citri OX=121845 GN=LOC103506086 PE=3 SV=1;tr|A0A3Q0ILA9|A0A3Q0ILA9_DIACI Actin, clone 205 isoform X2 OS=Diaphorina citri OX=121845 GN=LOC103506086 PE=3 SV=1	4	32	32	6	87.5	41.785	276420000	271300000	327940000	456870000	332980000	323240000	Quantified	GO:0005737(CC:cytoplasm);GO:0005856(CC:cytoskeleton);GO:0005524(MF:ATP binding)				PF00022(Actin)
A0A1S3CVQ2	Septin-2	LOC103506190		tr|A0A1S3CVQ2|A0A1S3CVQ2_DIACI	tr|A0A1S3CVQ2|A0A1S3CVQ2_DIACI Septin-2 OS=Diaphorina citri OX=121845 GN=LOC103506190 PE=3 SV=1	1	2	2	2	8.9	46.987	163070	157180	129890	133740	140300	171200	Quantified	GO:0005525(MF:GTP binding)				PF00735(Septin)
A0A1S3CVR5	Complex III subunit 9	LOC103506148		tr|A0A1S3CVR5|A0A1S3CVR5_DIACI	tr|A0A1S3CVR5|A0A1S3CVR5_DIACI Complex III subunit 9 OS=Diaphorina citri OX=121845 GN=LOC103506148 PE=3 SV=1	1	4	4	4	70.7	6.7817	2520700	2425200	2543700	5504500	3351500	3449600	Quantified	GO:0006122(BP:mitochondrial electron transport, ubiquinol to cytochrome c);GO:0005750(CC:mitochondrial respiratory chain complex III)			Membrane;Single-pass membrane protein;Mitochondrion inner membrane	PF05365(Ubiquinol-cytochrome C reductase, UQCRX/QCR9 like)
A0A3Q0IL98	Serine/threonine-protein kinase mig-15 isoform X3	LOC103506122		tr|A0A3Q0IL98|A0A3Q0IL98_DIACI;tr|A0A1S3CVS3|A0A1S3CVS3_DIACI;tr|A0A1S4E829|A0A1S4E829_DIACI;tr|A0A3Q0IN68|A0A3Q0IN68_DIACI	tr|A0A3Q0IL98|A0A3Q0IL98_DIACI Serine/threonine-protein kinase mig-15 isoform X3 OS=Diaphorina citri OX=121845 GN=LOC103506122 PE=4 SV=1;tr|A0A1S3CVS3|A0A1S3CVS3_DIACI Serine/threonine-protein kinase mig-15 isoform X2 OS=Diaphorina citri OX=121845 GN=LOC10	4	2	2	2	2.7	137.94		74881	6028.6	22615	4134.6	18219	Quantified	GO:0005524(MF:ATP binding);GO:0004672(MF:protein kinase activity)				PF00069(Protein kinase domain);PF00780(CNH domain)
A0A1S3CVS6	Uncharacterized protein LOC103506162	LOC103506162		tr|A0A1S3CVS6|A0A1S3CVS6_DIACI	tr|A0A1S3CVS6|A0A1S3CVS6_DIACI Uncharacterized protein LOC103506162 OS=Diaphorina citri OX=121845 GN=LOC103506162 PE=4 SV=1	1	1	1	1	18.9	16.771	46788	146190	78023		64171	59701	Quantified
A0A1S3CVU1	WAS/WASL-interacting protein family member 2-like	LOC103506191		tr|A0A1S3CVU1|A0A1S3CVU1_DIACI	tr|A0A1S3CVU1|A0A1S3CVU1_DIACI WAS/WASL-interacting protein family member 2-like OS=Diaphorina citri OX=121845 GN=LOC103506191 PE=3 SV=1	1	1	1	1	5.7	21.698	55029	36281	25886	46094	25754	31361	Quantified					PF01894(Uncharacterised protein family UPF0047)
A0A1S3CVU8	GTPase HRas	LOC103506233		tr|A0A1S3CVU8|A0A1S3CVU8_DIACI	tr|A0A1S3CVU8|A0A1S3CVU8_DIACI GTPase HRas OS=Diaphorina citri OX=121845 GN=LOC103506233 PE=4 SV=1	1	6	6	6	45.5	21.548	486800	497910	455660	589260	454720	467540	Quantified	GO:0007165(BP:signal transduction);GO:0016020(CC:membrane);GO:0005525(MF:GTP binding);GO:0003924(MF:GTPase activity)			Membrane;Lipid-anchor;Cytoplasmic side	PF00071(Ras family)
A0A1S3CVV0	Uncharacterized protein LOC103505544	LOC103505544		tr|A0A1S3CVV0|A0A1S3CVV0_DIACI	tr|A0A1S3CVV0|A0A1S3CVV0_DIACI Uncharacterized protein LOC103505544 OS=Diaphorina citri OX=121845 GN=LOC103505544 PE=4 SV=1	1	2	2	2	24.3	15.139	68334	65214	77103	74054	73871	66005	Quantified
A0A1S3CVV4	Uncharacterized protein LOC103506172 isoform X1	LOC103506172		tr|A0A1S3CVV4|A0A1S3CVV4_DIACI	tr|A0A1S3CVV4|A0A1S3CVV4_DIACI Uncharacterized protein LOC103506172 isoform X1 OS=Diaphorina citri OX=121845 GN=LOC103506172 PE=4 SV=2	1	1	1	1	0.9	164.28	2349100	1925100	1716400	2094600	1831700	1619600	Quantified
A0A1S3CVX1	Uncharacterized protein LOC103505570	LOC103505570		tr|A0A1S3CVX1|A0A1S3CVX1_DIACI	tr|A0A1S3CVX1|A0A1S3CVX1_DIACI Uncharacterized protein LOC103505570 OS=Diaphorina citri OX=121845 GN=LOC103505570 PE=4 SV=1	1	3	3	3	10.8	50.582	17585	21484	113660		12968	8110.8	Quantified
A0A1S3CVX9	Uncharacterized protein LOC103506326	LOC103506326		tr|A0A1S3CVX9|A0A1S3CVX9_DIACI	tr|A0A1S3CVX9|A0A1S3CVX9_DIACI Uncharacterized protein LOC103506326 OS=Diaphorina citri OX=121845 GN=LOC103506326 PE=3 SV=1	1	2	2	2	16.6	17.731	60165	25665	18354	104220	37839	92107	Quantified	GO:0016255(BP:attachment of GPI anchor to protein);GO:0042765(CC:GPI-anchor transamidase complex)			Endoplasmic reticulum membrane;Multi-pass membrane protein;Membrane	PF10510(Phosphatidylinositol-glycan biosynthesis class S protein)
A0A3Q0IVZ7	Erlin-1	LOC103508028		tr|A0A3Q0IVZ7|A0A3Q0IVZ7_DIACI;tr|A0A1S3CW00|A0A1S3CW00_DIACI	tr|A0A3Q0IVZ7|A0A3Q0IVZ7_DIACI Erlin-1 OS=Diaphorina citri OX=121845 GN=LOC103508028 PE=3 SV=1;tr|A0A1S3CW00|A0A1S3CW00_DIACI Erlin-1 OS=Diaphorina citri OX=121845 GN=LOC103506365 PE=3 SV=1	2	4	4	4	22.6	35.743	46960	75398	88787	40808	55194	73896	Quantified	GO:0005783(CC:endoplasmic reticulum);GO:0031625(MF:ubiquitin protein ligase binding)			Membrane;Single-pass type II membrane protein	PF01145(SPFH domain / Band 7 family)
A0A1S3CW15	Superoxide dismutase	LOC103506397	FUNCTION: Destroys radicals which are normally produced within the cells and which are toxic to biological systems. {ECO:0000256|RuleBase:RU000414}.	tr|A0A1S3CW15|A0A1S3CW15_DIACI;tr|A0A1S3CW51|A0A1S3CW51_DIACI;tr|A0A3Q0ILU4|A0A3Q0ILU4_DIACI	tr|A0A1S3CW15|A0A1S3CW15_DIACI Superoxide dismutase OS=Diaphorina citri OX=121845 GN=LOC103506397 PE=3 SV=1;tr|A0A1S3CW51|A0A1S3CW51_DIACI Superoxide dismutase OS=Diaphorina citri OX=121845 GN=LOC103506397 PE=3 SV=1;tr|A0A3Q0ILU4|A0A3Q0ILU4_DIACI Superoxid	3	13	13	13	75.9	24.854	11689000	11307000	8985900	16818000	11663000	11034000	Quantified	GO:0046872(MF:metal ion binding);GO:0004784(MF:superoxide dismutase activity)	K04564(NA)	ko04013(MAPK signaling pathway - fly);ko04068(FoxO signaling pathway);ko04146(Peroxisome)		PF02777(Iron/manganese superoxide dismutases, C-terminal domain);PF00081(Iron/manganese superoxide dismutases, alpha-hairpin domain)
A0A1S3CW20	Uncharacterized protein LOC103506399 isoform X1	LOC103506399		tr|A0A1S3CW20|A0A1S3CW20_DIACI	tr|A0A1S3CW20|A0A1S3CW20_DIACI Uncharacterized protein LOC103506399 isoform X1 OS=Diaphorina citri OX=121845 GN=LOC103506399 PE=4 SV=1	1	7	7	7	28.8	40.108	110150	182520	137320	265550	217330	202680	Quantified					PF00687(Ribosomal protein L1p/L10e family)
A0A1S3CW24	Uncharacterized protein LOC103506299	LOC103506299		tr|A0A1S3CW24|A0A1S3CW24_DIACI;tr|A0A3Q0ILV9|A0A3Q0ILV9_DIACI	tr|A0A1S3CW24|A0A1S3CW24_DIACI Uncharacterized protein LOC103506299 OS=Diaphorina citri OX=121845 GN=LOC103506299 PE=3 SV=1	2	3	3	3	15.2	31.344	59674	117990	140180	1814.5	84308	96216	Quantified	GO:0020037(MF:heme binding);GO:0046872(MF:metal ion binding);GO:0019825(MF:oxygen binding);GO:0005344(MF:oxygen carrier activity)				PF00042(Globin)
A0A1S3CW59	hydroxymethylglutaryl-CoA lyase	LOC103505678		tr|A0A1S3CW59|A0A1S3CW59_DIACI	tr|A0A1S3CW59|A0A1S3CW59_DIACI hydroxymethylglutaryl-CoA lyase OS=Diaphorina citri OX=121845 GN=LOC103505678 PE=3 SV=1	1	1	1	1	5.3	24.245		16064	16382			50496	Quantified	GO:0005829(CC:cytosol);GO:0004419(MF:hydroxymethylglutaryl-CoA lyase activity)				PF00682(HMGL-like)
A0A1S3CW67	mRNA-decapping enzyme-like protein	LOC103506448		tr|A0A1S3CW67|A0A1S3CW67_DIACI	tr|A0A1S3CW67|A0A1S3CW67_DIACI mRNA-decapping enzyme-like protein OS=Diaphorina citri OX=121845 GN=LOC103506448 PE=3 SV=1	1	1	1	1	3	44.773	17859	23616	13809	17287	16239	15716	Quantified	GO:0000290(BP:deadenylation-dependent decapping of nuclear-transcribed mRNA);GO:0008047(MF:enzyme activator activity)				PF16741(mRNA-decapping enzyme C-terminus);PF06058(Dcp1-like decapping family)
A0A3Q0ISR7	Ubiquitin domain-containing protein UBFD1 isoform X2	LOC103506425		tr|A0A3Q0ISR7|A0A3Q0ISR7_DIACI;tr|A0A1S3CW76|A0A1S3CW76_DIACI	tr|A0A3Q0ISR7|A0A3Q0ISR7_DIACI Ubiquitin domain-containing protein UBFD1 isoform X2 OS=Diaphorina citri OX=121845 GN=LOC103506425 PE=4 SV=1;tr|A0A1S3CW76|A0A1S3CW76_DIACI Ubiquitin domain-containing protein UBFD1 isoform X1 OS=Diaphorina citri OX=121845 GN	2	4	4	4	24.2	31.441	96930	88164	95030	160510	87223	85001	Quantified					PF00240(Ubiquitin family)
A0A1S3CW83	Uncharacterized protein LOC103506411	LOC103506411		tr|A0A1S3CW83|A0A1S3CW83_DIACI	tr|A0A1S3CW83|A0A1S3CW83_DIACI Uncharacterized protein LOC103506411 OS=Diaphorina citri OX=121845 GN=LOC103506411 PE=4 SV=1	1	2	2	2	37.1	17.616	69769	115100	181690		54437	48781	Quantified
A0A1S3CW84	26S proteasome non-ATPase regulatory subunit 14-like	LOC103505718		tr|A0A1S3CW84|A0A1S3CW84_DIACI;tr|A0A3Q0IKT0|A0A3Q0IKT0_DIACI	tr|A0A1S3CW84|A0A1S3CW84_DIACI 26S proteasome non-ATPase regulatory subunit 14-like OS=Diaphorina citri OX=121845 GN=LOC103505718 PE=4 SV=1;tr|A0A3Q0IKT0|A0A3Q0IKT0_DIACI 26S proteasome non-ATPase regulatory subunit 14 OS=Diaphorina citri OX=121845 GN=LOC1	2	4	4	4	46	13.271	140620	158920	160770	174990	193220	209820	Quantified	GO:0000502(CC:proteasome complex);GO:0061578(MF:Lys63-specific deubiquitinase activity);GO:0008237(MF:metallopeptidase activity)				PF13012(Maintenance of mitochondrial structure and function)
A0A1S3CW85	Probable nuclear hormone receptor HR3	LOC103506495		tr|A0A1S3CW85|A0A1S3CW85_DIACI	tr|A0A1S3CW85|A0A1S3CW85_DIACI Probable nuclear hormone receptor HR3 OS=Diaphorina citri OX=121845 GN=LOC103506495 PE=3 SV=1	1	1	1	1	2	51.017	2248500	1478600	12101	1771600	1651600	2017200	Quantified	GO:0042025(CC:host cell nucleus);GO:0005634(CC:nucleus);GO:0004879(MF:nuclear receptor activity);GO:0043565(MF:sequence-specific DNA binding);GO:0003707(MF:steroid hormone receptor activity);GO:0008270(MF:zinc ion binding)			Nucleus	PF00105(Zinc finger, C4 type (two domains));PF00104(Ligand-binding domain of nuclear hormone receptor)
A0A1S3CW90	glycerol kinase	LOC103506505		tr|A0A1S3CW90|A0A1S3CW90_DIACI;tr|A0A1S3DP08|A0A1S3DP08_DIACI	tr|A0A1S3CW90|A0A1S3CW90_DIACI glycerol kinase OS=Diaphorina citri OX=121845 GN=LOC103506505 PE=3 SV=1	2	8	8	8	26.1	57.149	49912	177430	177310	358670	189410	255120	Quantified	GO:0005975(BP:carbohydrate metabolic process);GO:0006072(BP:glycerol-3-phosphate metabolic process);GO:0004370(MF:glycerol kinase activity)				PF00370(FGGY family of carbohydrate kinases, N-terminal domain);PF02782(FGGY family of carbohydrate kinases, C-terminal domain)
A0A1S3CW92	Troponin C	LOC103506455		tr|A0A1S3CW92|A0A1S3CW92_DIACI	tr|A0A1S3CW92|A0A1S3CW92_DIACI Troponin C OS=Diaphorina citri OX=121845 GN=LOC103506455 PE=4 SV=1	1	3	3	3	27.9	15.796	232160	259080	163260	50117	197150	205670	Quantified	GO:0005509(MF:calcium ion binding)				PF14658(EF-hand domain);PF13499(EF-hand domain pair)
A0A1S3CW97	Protein NDUFAF4 homolog	LOC103506460		tr|A0A1S3CW97|A0A1S3CW97_DIACI	tr|A0A1S3CW97|A0A1S3CW97_DIACI Protein NDUFAF4 homolog OS=Diaphorina citri OX=121845 GN=LOC103506460 PE=4 SV=1	1	1	1	1	7.4	31.289	74523	88266	66711	189550	118220	115390	Quantified	GO:0032981(BP:mitochondrial respiratory chain complex I assembly)				PF06784(Uncharacterised protein family (UPF0240))
A0A1S3CW98	Papilin-like	LOC103506437		tr|A0A1S3CW98|A0A1S3CW98_DIACI	tr|A0A1S3CW98|A0A1S3CW98_DIACI Papilin-like OS=Diaphorina citri OX=121845 GN=LOC103506437 PE=4 SV=1	1	8	8	8	33.1	37.326	729160	507980	418020	826680	499050	476850	Quantified	GO:0008233(MF:peptidase activity)				PF07679(Immunoglobulin I-set domain);PF08686(PLAC (protease and lacunin) domain)
A0A1S3CWA8	Cytochrome c oxidase subunit 5A, mitochondrial	LOC103506449		tr|A0A1S3CWA8|A0A1S3CWA8_DIACI	tr|A0A1S3CWA8|A0A1S3CWA8_DIACI Cytochrome c oxidase subunit 5A, mitochondrial OS=Diaphorina citri OX=121845 GN=LOC103506449 PE=3 SV=1	1	1	1	1	14.3	18.118	63961		52694		17793		Quantified	GO:0005743(CC:mitochondrial inner membrane);GO:0004129(MF:cytochrome-c oxidase activity)			Mitochondrion inner membrane;Peripheral membrane protein;Matrix side	PF02284(Cytochrome c oxidase subunit Va)
A0A1S3CWA9	Uncharacterized protein LOC103506538	LOC103506538		tr|A0A1S3CWA9|A0A1S3CWA9_DIACI	tr|A0A1S3CWA9|A0A1S3CWA9_DIACI Uncharacterized protein LOC103506538 OS=Diaphorina citri OX=121845 GN=LOC103506538 PE=4 SV=1	1	2	2	2	16	24.184	69442	70852	108280	324820	104350	661820	Quantified
A0A1S3CWB5	Protein obstructor-E	LOC103506532		tr|A0A1S3CWB5|A0A1S3CWB5_DIACI	tr|A0A1S3CWB5|A0A1S3CWB5_DIACI Protein obstructor-E OS=Diaphorina citri OX=121845 GN=LOC103506532 PE=4 SV=1	1	3	3	3	16.6	33.368	14118	79803	34927	24401	45811	51248	Quantified	GO:0005576(CC:extracellular region);GO:0008061(MF:chitin binding)				PF01607(Chitin binding Peritrophin-A domain)
A0A1S3CWC7	RNA-binding protein squid-like	LOC103506472		tr|A0A1S3CWC7|A0A1S3CWC7_DIACI	tr|A0A1S3CWC7|A0A1S3CWC7_DIACI RNA-binding protein squid-like OS=Diaphorina citri OX=121845 GN=LOC103506472 PE=4 SV=1	1	10	4	4	46.2	29.93	311400	321760	336160	344820	334550	374960	Quantified	GO:0003729(MF:mRNA binding)				PF00076(RNA recognition motif. (a.k.a. RRM, RBD, or RNP domain))
A0A1S3CWC9	COP9 signalosome complex subunit 6	LOC103506573	FUNCTION: Component of the COP9 signalosome complex (CSN), a complex involved in various cellular and developmental processes. {ECO:0000256|RuleBase:RU367006}.	tr|A0A1S3CWC9|A0A1S3CWC9_DIACI	tr|A0A1S3CWC9|A0A1S3CWC9_DIACI COP9 signalosome complex subunit 6 OS=Diaphorina citri OX=121845 GN=LOC103506573 PE=3 SV=1	1	4	4	4	21.5	36.816	16744	178480	55421	49074	53650	39040	Quantified	GO:0000338(BP:protein deneddylation);GO:0008180(CC:COP9 signalosome);GO:0005737(CC:cytoplasm)			Cytoplasm;Nucleus	PF01398(JAB1/Mov34/MPN/PAD-1 ubiquitin protease);PF13012(Maintenance of mitochondrial structure and function)
A0A1S3CWD9	Translation initiation factor eIF-2B subunit delta	LOC103506589		tr|A0A1S3CWD9|A0A1S3CWD9_DIACI	tr|A0A1S3CWD9|A0A1S3CWD9_DIACI Translation initiation factor eIF-2B subunit delta OS=Diaphorina citri OX=121845 GN=LOC103506589 PE=3 SV=1	1	1	1	1	2.5	78.489	11798	43523	25877		26331		Quantified	GO:0003743(MF:translation initiation factor activity)				PF01008(Initiation factor 2 subunit family)
A0A1S3CWE0	40S ribosomal protein S24	LOC103506570		tr|A0A1S3CWE0|A0A1S3CWE0_DIACI;tr|A0A3Q0IM69|A0A3Q0IM69_DIACI;tr|Q0PXY5|Q0PXY5_DIACI	tr|A0A1S3CWE0|A0A1S3CWE0_DIACI 40S ribosomal protein S24 OS=Diaphorina citri OX=121845 GN=LOC103506570 PE=3 SV=1;tr|A0A3Q0IM69|A0A3Q0IM69_DIACI 40S ribosomal protein S24 OS=Diaphorina citri OX=121845 GN=LOC103506570 PE=3 SV=1;tr|Q0PXY5|Q0PXY5_DIACI 40S rib	3	3	3	3	36	15.568	661600	990850	719270	1680400	870550	1105500	Quantified	GO:0006412(BP:translation);GO:0005840(CC:ribosome);GO:0003735(MF:structural constituent of ribosome)				PF01282(Ribosomal protein S24e)
A0A1S3CXS6	Galactose mutarotase	LOC103506599		tr|A0A1S3CXS6|A0A1S3CXS6_DIACI;tr|A0A1S3CWF4|A0A1S3CWF4_DIACI	tr|A0A1S3CXS6|A0A1S3CXS6_DIACI Galactose mutarotase OS=Diaphorina citri OX=121845 GN=LOC103506599 PE=4 SV=1;tr|A0A1S3CWF4|A0A1S3CWF4_DIACI Galactose mutarotase OS=Diaphorina citri OX=121845 GN=LOC103506600 PE=4 SV=2	2	1	1	1	8.5	24.134		8189.9	44921		4222	2020.7	Quantified	GO:0005975(BP:carbohydrate metabolic process);GO:0030246(MF:carbohydrate binding);GO:0016853(MF:isomerase activity)				PF01263(Aldose 1-epimerase)
A0A1S3CWG7	Uncharacterized protein LOC103505835	LOC103505835		tr|A0A1S3CWG7|A0A1S3CWG7_DIACI;tr|A0A3Q0IR97|A0A3Q0IR97_DIACI;tr|A0A3Q0IKT5|A0A3Q0IKT5_DIACI	tr|A0A1S3CWG7|A0A1S3CWG7_DIACI Uncharacterized protein LOC103505835 OS=Diaphorina citri OX=121845 GN=LOC103505835 PE=4 SV=2	3	6	6	6	20.7	67.676	133760	211030	255400	266820	316890	234370	Quantified	GO:0008299(BP:isoprenoid biosynthetic process);GO:0016765(MF:transferase activity, transferring alkyl or aryl (other than methyl) groups)				PF00348(Polyprenyl synthetase)
A0A1S3CWG9	Uncharacterized protein LOC103506625	LOC103506625		tr|A0A1S3CWG9|A0A1S3CWG9_DIACI	tr|A0A1S3CWG9|A0A1S3CWG9_DIACI Uncharacterized protein LOC103506625 OS=Diaphorina citri OX=121845 GN=LOC103506625 PE=4 SV=1	1	3	3	1	31	15.089	389050	1059200	1054200	70141	836490	354040	Quantified
A0A1S3CWH0	procollagen-lysine 5-dioxygenase	LOC103506550		tr|A0A1S3CWH0|A0A1S3CWH0_DIACI	tr|A0A1S3CWH0|A0A1S3CWH0_DIACI procollagen-lysine 5-dioxygenase OS=Diaphorina citri OX=121845 GN=LOC103506550 PE=4 SV=1	1	3	3	3	6.5	84.497	63574	26059	40580	245280	78761	143600	Quantified	GO:0051213(MF:dioxygenase activity);GO:0005506(MF:iron ion binding);GO:0031418(MF:L-ascorbic acid binding);GO:0016705(MF:oxidoreductase activity, acting on paired donors, with incorporation or reduction of molecular oxygen)
A0A3R5YN75	ATP-binding cassette sub-family B member 3	ABCB3		tr|A0A3R5YN75|A0A3R5YN75_DIACI;tr|A0A1S3CWH8|A0A1S3CWH8_DIACI	tr|A0A3R5YN75|A0A3R5YN75_DIACI ATP-binding cassette sub-family B member 3 OS=Diaphorina citri OX=121845 GN=ABCB3 PE=2 SV=1;tr|A0A1S3CWH8|A0A1S3CWH8_DIACI ATP-binding cassette sub-family B member 7, mitochondrial-like OS=Diaphorina citri OX=121845 GN=LOC103	2	6	6	6	13.9	78.14	166410	118180	179910	382100	220200	361470	Quantified	GO:0016021(CC:integral component of membrane);GO:0005524(MF:ATP binding);GO:0016887(MF:ATPase activity);GO:0042626(MF:ATPase activity, coupled to transmembrane movement of substances)			Membrane;Multi-pass membrane protein	PF00664(ABC transporter transmembrane region);PF00005(ABC transporter)
A0A1S3CWJ4	ATP synthase subunit beta, mitochondrial-like	LOC103506594		tr|A0A1S3CWJ4|A0A1S3CWJ4_DIACI	tr|A0A1S3CWJ4|A0A1S3CWJ4_DIACI ATP synthase subunit beta, mitochondrial-like OS=Diaphorina citri OX=121845 GN=LOC103506594 PE=3 SV=2	1	17	17	17	74.1	27.847	107980000	82990000	81201000	125340000	103540000	97732000	Quantified	GO:0046034(BP:ATP metabolic process);GO:1902600(BP:proton transmembrane transport);GO:0005524(MF:ATP binding)				PF00006(ATP synthase alpha/beta family, nucleotide-binding domain);PF02874(ATP synthase alpha/beta family, beta-barrel domain)
A0A1S3CWL3	Gamma-interferon-inducible lysosomal thiol reductase-like	LOC103506626		tr|A0A1S3CWL3|A0A1S3CWL3_DIACI;tr|A0A3Q0IQV2|A0A3Q0IQV2_DIACI	tr|A0A1S3CWL3|A0A1S3CWL3_DIACI Gamma-interferon-inducible lysosomal thiol reductase-like OS=Diaphorina citri OX=121845 GN=LOC103506626 PE=3 SV=1;tr|A0A3Q0IQV2|A0A3Q0IQV2_DIACI Gamma-interferon-inducible lysosomal thiol reductase-like OS=Diaphorina citri OX	2	10	10	10	55.2	23.938	2133900	2301300	2255000	2679000	2427900	2892800	Quantified					PF03227(Gamma interferon inducible lysosomal thiol reductase (GILT))
A0A1S3CWL5	Uncharacterized protein LOC103506676	LOC103506676		tr|A0A1S3CWL5|A0A1S3CWL5_DIACI	tr|A0A1S3CWL5|A0A1S3CWL5_DIACI Uncharacterized protein LOC103506676 OS=Diaphorina citri OX=121845 GN=LOC103506676 PE=3 SV=2	1	7	7	7	17.3	59.11	407320	538600	449510	838300	759340	581500	Quantified					PF01161(Phosphatidylethanolamine-binding protein)
A0A1S3CWL7	Hsp90 co-chaperone Cdc37-like	LOC103506637		tr|A0A1S3CWL7|A0A1S3CWL7_DIACI;tr|A0A1S3DH02|A0A1S3DH02_DIACI	tr|A0A1S3CWL7|A0A1S3CWL7_DIACI Hsp90 co-chaperone Cdc37-like OS=Diaphorina citri OX=121845 GN=LOC103506637 PE=3 SV=1;tr|A0A1S3DH02|A0A1S3DH02_DIACI Hsp90 co-chaperone Cdc37-like OS=Diaphorina citri OX=121845 GN=LOC103517534 PE=3 SV=1	2	2	2	2	25.3	18.176	11303	9416.5	70951		11102	8287.1	Quantified				Cytoplasm	PF08565(Cdc37 Hsp90 binding domain)
A0A1S3CWM4	NADH dehydrogenase [ubiquinone] 1 alpha subcomplex subunit 11	LOC103506691		tr|A0A1S3CWM4|A0A1S3CWM4_DIACI	tr|A0A1S3CWM4|A0A1S3CWM4_DIACI NADH dehydrogenase [ubiquinone] 1 alpha subcomplex subunit 11 OS=Diaphorina citri OX=121845 GN=LOC103506691 PE=3 SV=1	1	5	5	5	46.3	21.347	1863200	2030900	2246700	2385800	3150000	2766900	Quantified	GO:0032981(BP:mitochondrial respiratory chain complex I assembly)			Mitochondrion inner membrane;Multi-pass membrane protein;Matrix side
A0A1S3CWP5	Venom acid phosphatase Acph-1-like	LOC103506681		tr|A0A1S3CWP5|A0A1S3CWP5_DIACI;tr|A0A3Q0IZB1|A0A3Q0IZB1_DIACI	tr|A0A1S3CWP5|A0A1S3CWP5_DIACI Venom acid phosphatase Acph-1-like OS=Diaphorina citri OX=121845 GN=LOC103506681 PE=4 SV=2;tr|A0A3Q0IZB1|A0A3Q0IZB1_DIACI Lysosomal acid phosphatase-like OS=Diaphorina citri OX=121845 GN=LOC113468687 PE=4 SV=1	2	2	2	2	5.3	50.195	2951.6	58896	12799		4856	3637.2	Quantified	GO:0003993(MF:acid phosphatase activity)				PF00328(Histidine phosphatase superfamily (branch 2))
A0A1S3CWP8	Cysteine proteinase COT44-like	LOC103506723		tr|A0A1S3CWP8|A0A1S3CWP8_DIACI	tr|A0A1S3CWP8|A0A1S3CWP8_DIACI Cysteine proteinase COT44-like OS=Diaphorina citri OX=121845 GN=LOC103506723 PE=3 SV=1	1	8	4	4	67.3	18.22	3392900	2606900	1263400	3743300	2383700	3075100	Quantified	GO:0008234(MF:cysteine-type peptidase activity)				PF00112(Papain family cysteine protease)
A0A1S3CWQ4	Uncharacterized protein LOC103506671	LOC103506671		tr|A0A1S3CWQ4|A0A1S3CWQ4_DIACI	tr|A0A1S3CWQ4|A0A1S3CWQ4_DIACI Uncharacterized protein LOC103506671 OS=Diaphorina citri OX=121845 GN=LOC103506671 PE=4 SV=1	1	2	2	2	18.3	13.652	171650	131860	127000	19167	69598	91709	Quantified
A0A1S3CWR1	28S ribosomal protein S21, mitochondrial	LOC103506745		tr|A0A1S3CWR1|A0A1S3CWR1_DIACI	tr|A0A1S3CWR1|A0A1S3CWR1_DIACI 28S ribosomal protein S21, mitochondrial OS=Diaphorina citri OX=121845 GN=LOC103506745 PE=3 SV=1	1	1	1	1	13.8	10.381	19869	15762	16897	23419	15971	19927	Quantified	GO:0006412(BP:translation);GO:0005840(CC:ribosome);GO:0003735(MF:structural constituent of ribosome)				PF01165(Ribosomal protein S21)
A0A1S3CWU1	SH3 domain-binding glutamic acid-rich protein homolog isoform X1	LOC103506724		tr|A0A1S3CWU1|A0A1S3CWU1_DIACI	tr|A0A1S3CWU1|A0A1S3CWU1_DIACI SH3 domain-binding glutamic acid-rich protein homolog isoform X1 OS=Diaphorina citri OX=121845 GN=LOC103506724 PE=3 SV=1	1	2	2	2	20.2	14.408	598870	381350	231120	741910	326310	376700	Quantified					PF04908(SH3-binding, glutamic acid-rich protein)
A0A1S3CWU7	ADP-ribosylation factor-like protein 3	LOC103506065		tr|A0A1S3CWU7|A0A1S3CWU7_DIACI	tr|A0A1S3CWU7|A0A1S3CWU7_DIACI ADP-ribosylation factor-like protein 3 OS=Diaphorina citri OX=121845 GN=LOC103506065 PE=3 SV=1	1	6	6	6	48.2	24.794	477730	401370	414700	594450	400890	393810	Quantified	GO:0005525(MF:GTP binding)				PF00025(ADP-ribosylation factor family)
A0A1S3CWV2	Prefoldin subunit 2	LOC103506804		tr|A0A1S3CWV2|A0A1S3CWV2_DIACI	tr|A0A1S3CWV2|A0A1S3CWV2_DIACI Prefoldin subunit 2 OS=Diaphorina citri OX=121845 GN=LOC103506804 PE=3 SV=1	1	3	3	3	29.2	16.251	321640	247560	230720	313750	264110	271280	Quantified	GO:0006457(BP:protein folding);GO:0016272(CC:prefoldin complex);GO:0051082(MF:unfolded protein binding)				PF01920(Prefoldin subunit)
A0A3Q0IMU6	Alkaline phosphatase	LOC103506767		tr|A0A3Q0IMU6|A0A3Q0IMU6_DIACI;tr|A0A1S3CWV3|A0A1S3CWV3_DIACI	tr|A0A3Q0IMU6|A0A3Q0IMU6_DIACI Alkaline phosphatase OS=Diaphorina citri OX=121845 GN=LOC103506767 PE=3 SV=1;tr|A0A1S3CWV3|A0A1S3CWV3_DIACI Alkaline phosphatase OS=Diaphorina citri OX=121845 GN=LOC103506767 PE=3 SV=1	2	6	6	6	23.2	48.822	93332	212540	271280	96494	183670	135130	Quantified	GO:0004035(MF:alkaline phosphatase activity)				PF00245(Alkaline phosphatase)
A0A1S3CWV6	Phosphatidylinositol 4-phosphate 5-kinase type-1 alpha-like isoform X2	LOC103506746		tr|A0A1S3CWV6|A0A1S3CWV6_DIACI;tr|A0A1S4E8G8|A0A1S4E8G8_DIACI;tr|A0A1S3CY28|A0A1S3CY28_DIACI;tr|A0A1S4E8H7|A0A1S4E8H7_DIACI	tr|A0A1S3CWV6|A0A1S3CWV6_DIACI Phosphatidylinositol 4-phosphate 5-kinase type-1 alpha-like isoform X2 OS=Diaphorina citri OX=121845 GN=LOC103506746 PE=4 SV=1;tr|A0A1S4E8G8|A0A1S4E8G8_DIACI Phosphatidylinositol 4-phosphate 5-kinase type-1 alpha-like isoform	4	4	4	4	9.7	72.841	75769	103880	118530	99712	76359	55653	Quantified	GO:0005524(MF:ATP binding);GO:0016307(MF:phosphatidylinositol phosphate kinase activity)				PF01504(Phosphatidylinositol-4-phosphate 5-Kinase)
A0A1S3CWW5	Alpha-actinin, sarcomeric-like	LOC103506762		tr|A0A1S3CWW5|A0A1S3CWW5_DIACI	tr|A0A1S3CWW5|A0A1S3CWW5_DIACI Alpha-actinin, sarcomeric-like OS=Diaphorina citri OX=121845 GN=LOC103506762 PE=4 SV=1	1	18	18	18	71.4	33.45	10246000	13094000	13541000	20268000	16784000	16574000	Quantified	GO:0003779(MF:actin binding)				PF00307(Calponin homology (CH) domain)
A0A1S3CWW9	Zinc finger CCCH domain-containing protein 11A-like	LOC103506837		tr|A0A1S3CWW9|A0A1S3CWW9_DIACI	tr|A0A1S3CWW9|A0A1S3CWW9_DIACI Zinc finger CCCH domain-containing protein 11A-like OS=Diaphorina citri OX=121845 GN=LOC103506837 PE=4 SV=1	1	2	2	2	22.5	14.986	40652	99138	80711		75068	79347	Quantified	GO:0046872(MF:metal ion binding)				PF15663(Zinc-finger containing family)
A0A1S3CWY8	EH domain-containing protein 1	LOC103506863		tr|A0A1S3CWY8|A0A1S3CWY8_DIACI	tr|A0A1S3CWY8|A0A1S3CWY8_DIACI EH domain-containing protein 1 OS=Diaphorina citri OX=121845 GN=LOC103506863 PE=4 SV=1	1	23	23	21	49.8	62.091	1324800	1445200	1398000	1917000	1377800	1406700	Quantified	GO:0032456(BP:endocytic recycling);GO:0005509(MF:calcium ion binding);GO:0005525(MF:GTP binding)			Cell membrane;Peripheral membrane protein;Cytoplasmic side;Endosome membrane;Membrane	PF16880(N-terminal EH-domain containing protein);PF00350(Dynamin family);PF12763(Cytoskeletal-regulatory complex EF hand)
A0A3Q0IN55	Protein no-on-transient A isoform X2	LOC103506883		tr|A0A3Q0IN55|A0A3Q0IN55_DIACI;tr|A0A1S3CWZ7|A0A1S3CWZ7_DIACI	tr|A0A3Q0IN55|A0A3Q0IN55_DIACI Protein no-on-transient A isoform X2 OS=Diaphorina citri OX=121845 GN=LOC103506883 PE=4 SV=1;tr|A0A1S3CWZ7|A0A1S3CWZ7_DIACI Protein no-on-transient A isoform X1 OS=Diaphorina citri OX=121845 GN=LOC103506883 PE=4 SV=1	2	3	3	3	11.4	51.697		92093	37666	3526.4	2686.8	9692.9	Quantified	GO:0003723(MF:RNA binding)				PF08075(NOPS (NUC059) domain);PF00076(RNA recognition motif. (a.k.a. RRM, RBD, or RNP domain))
A0A1S3CX11	Succinate--CoA ligase [ADP/GDP-forming] subunit alpha, mitochondrial	LOC103506896	FUNCTION: Succinyl-CoA synthetase functions in the citric acid cycle (TCA), coupling the hydrolysis of succinyl-CoA to the synthesis of either ATP or GTP and thus represents the only step of substrate-level phosphorylation in the TCA. The alpha subunit of the enzyme binds the substrates coenzyme A and phosphate, while succinate binding and specificity for either ATP or GTP is provided by differen…	tr|A0A1S3CX11|A0A1S3CX11_DIACI	tr|A0A1S3CX11|A0A1S3CX11_DIACI Succinate--CoA ligase [ADP/GDP-forming] subunit alpha, mitochondrial OS=Diaphorina citri OX=121845 GN=LOC103506896 PE=3 SV=1	1	13	13	13	52.5	35.493	21407000	23023000	19906000	28371000	28458000	25792000	Quantified	GO:0006099(BP:tricarboxylic acid cycle);GO:0005739(CC:mitochondrion);GO:0048037(MF:cofactor binding);GO:0000166(MF:nucleotide binding);GO:0004775(MF:succinate-CoA ligase (ADP-forming) activity);GO:0004776(MF:succinate-CoA ligase (GDP-forming) activity)	K01902(NA)	ko00020(Citrate cycle (TCA cycle));ko00640(Propanoate metabolism);ko00660(C5-Branched dibasic acid metabolism);ko00720(Carbon fixation pathways in prokaryotes)	Mitochondrion	PF02629(CoA binding domain);PF00549(CoA-ligase)
A0A1S3CX17	Coatomer subunit zeta	LOC103506899	FUNCTION: The zeta subunit may be involved in regulating the coat assembly and, hence, the rate of biosynthetic protein transport due to its association-dissociation properties with the coatomer complex. {ECO:0000256|RuleBase:RU366053}.	tr|A0A1S3CX17|A0A1S3CX17_DIACI	tr|A0A1S3CX17|A0A1S3CX17_DIACI Coatomer subunit zeta OS=Diaphorina citri OX=121845 GN=LOC103506899 PE=3 SV=1	1	2	2	2	16.6	20.438		673390	239970	313420	2901100	3569200	Quantified	GO:0015031(BP:protein transport);GO:0006890(BP:retrograde vesicle-mediated transport, Golgi to ER);GO:0030126(CC:COPI vesicle coat);GO:0000139(CC:Golgi membrane)			Cytoplasm;Golgi apparatus membrane;Peripheral membrane protein;Cytoplasmic side;Cytoplasmic vesicle;COPI-coated vesicle membrane	PF01217(Clathrin adaptor complex small chain)
A0A1S3CX20	Vacuolar protein sorting-associated protein 13C	LOC103506921		tr|A0A1S3CX20|A0A1S3CX20_DIACI	tr|A0A1S3CX20|A0A1S3CX20_DIACI Vacuolar protein sorting-associated protein 13C OS=Diaphorina citri OX=121845 GN=LOC103506921 PE=4 SV=1	1	4	2	2	23	30.364	45323	73164	60761	85516	60860	82086	Quantified					PF16910(Repeating coiled region of VPS13)
A0A1S3CX38	Glucose-6-phosphate 1-dehydrogenase	LOC103506864		tr|A0A1S3CX38|A0A1S3CX38_DIACI;tr|A0A1S3CYA5|A0A1S3CYA5_DIACI;tr|A0A1S3CWZ0|A0A1S3CWZ0_DIACI;tr|A0A1S4E8N2|A0A1S4E8N2_DIACI	tr|A0A1S3CX38|A0A1S3CX38_DIACI Glucose-6-phosphate 1-dehydrogenase OS=Diaphorina citri OX=121845 GN=LOC103506864 PE=4 SV=1;tr|A0A1S3CYA5|A0A1S3CYA5_DIACI Glucose-6-phosphate 1-dehydrogenase OS=Diaphorina citri OX=121845 GN=LOC103506864 PE=4 SV=1;tr|A0A1S3C	4	8	8	8	65.3	19.917	921030	994340	941940	1311500	962660	903280	Quantified	GO:0006006(BP:glucose metabolic process);GO:0050661(MF:NADP binding);GO:0016614(MF:oxidoreductase activity, acting on CH-OH group of donors)				PF00479(Glucose-6-phosphate dehydrogenase, NAD binding domain)
A0A1S3CX43	Glutathione-independent glyoxalase DJR-1.1-like	LOC103506956		tr|A0A1S3CX43|A0A1S3CX43_DIACI	tr|A0A1S3CX43|A0A1S3CX43_DIACI Glutathione-independent glyoxalase DJR-1.1-like OS=Diaphorina citri OX=121845 GN=LOC103506956 PE=4 SV=1	1	7	7	7	29.2	17.586	2486600	2061600	1851700	2293400	2499800	2312700	Quantified					PF01965(DJ-1/PfpI family)
A0A1S3CX47	Pro-resilin-like	LOC103506880		tr|A0A1S3CX47|A0A1S3CX47_DIACI	tr|A0A1S3CX47|A0A1S3CX47_DIACI Pro-resilin-like OS=Diaphorina citri OX=121845 GN=LOC103506880 PE=4 SV=1	1	2	2	2	25.2	13.734	5377100	4157100	2785500	4081900	3427000	3249400	Quantified	GO:0042302(MF:structural constituent of cuticle)				PF00379(Insect cuticle protein)
A0A1S3CX50	Thioredoxin, mitochondrial-like	LOC103506223		tr|A0A1S3CX50|A0A1S3CX50_DIACI	tr|A0A1S3CX50|A0A1S3CX50_DIACI Thioredoxin, mitochondrial-like OS=Diaphorina citri OX=121845 GN=LOC103506223 PE=4 SV=1	1	5	5	5	37.4	16.27	2240900	1487200	1329200	2411600	1741200	1723100	Quantified	GO:0045454(BP:cell redox homeostasis);GO:0006662(BP:glycerol ether metabolic process);GO:0005623(CC:cell);GO:0015035(MF:protein disulfide oxidoreductase activity)				PF00085(Thioredoxin)
A0A1S3CX58	60S ribosomal protein L13	LOC103506989		tr|A0A1S3CX58|A0A1S3CX58_DIACI;tr|Q0PXV2|Q0PXV2_DIACI;tr|A0A1S4E977|A0A1S4E977_DIACI	tr|A0A1S3CX58|A0A1S3CX58_DIACI 60S ribosomal protein L13 OS=Diaphorina citri OX=121845 GN=LOC103506989 PE=3 SV=1;tr|Q0PXV2|Q0PXV2_DIACI 60S ribosomal protein L13 OS=Diaphorina citri OX=121845 GN=LOC103506989 PE=2 SV=1	3	6	6	6	24.4	25.395	1058800	1220200	1009000	2177700	1333000	1623300	Quantified	GO:0006412(BP:translation);GO:0005840(CC:ribosome);GO:0003735(MF:structural constituent of ribosome)				PF01294(Ribosomal protein L13e)
A0A1S3CX64	Adenylosuccinate lyase	LOC103506939		tr|A0A1S3CX64|A0A1S3CX64_DIACI	tr|A0A1S3CX64|A0A1S3CX64_DIACI Adenylosuccinate lyase OS=Diaphorina citri OX=121845 GN=LOC103506939 PE=4 SV=1	1	3	3	3	39.2	13.673	62356	64069	87275	42747	87495	100850	Quantified	GO:0016829(MF:lyase activity)				PF00206(Lyase)
A0A1S3CX88	Cytochrome c	LOC103507048	FUNCTION: Electron carrier protein. The oxidized form of the cytochrome c heme group can accept an electron from the heme group of the cytochrome c1 subunit of cytochrome reductase. Cytochrome c then transfers this electron to the cytochrome oxidase complex, the final protein carrier in the mitochondrial electron-transport chain. {ECO:0000256|RuleBase:RU004427}.	tr|A0A1S3CX88|A0A1S3CX88_DIACI	tr|A0A1S3CX88|A0A1S3CX88_DIACI Cytochrome c OS=Diaphorina citri OX=121845 GN=LOC103507048 PE=3 SV=1	1	8	8	8	48.1	11.78	30235000	28085000	27261000	40743000	30640000	30513000	Quantified	GO:0005739(CC:mitochondrion);GO:0070469(CC:respiratory chain);GO:0009055(MF:electron transfer activity);GO:0020037(MF:heme binding);GO:0046872(MF:metal ion binding)	K08738(NA)	ko00190(Oxidative phosphorylation);ko02020(Two-component system);ko04115(p53 signaling pathway);ko04210(Apoptosis);ko04214(Apoptosis - fly);ko04215(Apoptosis - multiple species)	Mitochondrion intermembrane space	PF00034(Cytochrome c)
A0A1S3CX92	Troponin C-like	LOC103506300		tr|A0A1S3CX92|A0A1S3CX92_DIACI;tr|A0A1S4E804|A0A1S4E804_DIACI	tr|A0A1S3CX92|A0A1S3CX92_DIACI Troponin C-like OS=Diaphorina citri OX=121845 GN=LOC103506300 PE=4 SV=1;tr|A0A1S4E804|A0A1S4E804_DIACI Troponin C-like OS=Diaphorina citri OX=121845 GN=LOC108252022 PE=4 SV=1	2	8	8	7	64.7	17.754	10531000	8910300	7776300	11580000	10920000	9426700	Quantified	GO:0005509(MF:calcium ion binding)				PF13499(EF-hand domain pair)
A0A1S3CX95	Prenylcysteine oxidase-like	LOC103506991		tr|A0A1S3CX95|A0A1S3CX95_DIACI	tr|A0A1S3CX95|A0A1S3CX95_DIACI Prenylcysteine oxidase-like OS=Diaphorina citri OX=121845 GN=LOC103506991 PE=3 SV=1	1	1	1	1	4.6	53.95			23764		35432	35455	Quantified	GO:0030328(BP:prenylcysteine catabolic process);GO:0001735(MF:prenylcysteine oxidase activity)				PF13450(NAD(P)-binding Rossmann-like domain);PF07156(Prenylcysteine lyase)
A0A1S3CXA6	GTP cyclohydrolase 1	LOC103507006		tr|A0A1S3CXA6|A0A1S3CXA6_DIACI;tr|A0A1S4E987|A0A1S4E987_DIACI	tr|A0A1S3CXA6|A0A1S3CXA6_DIACI GTP cyclohydrolase 1 OS=Diaphorina citri OX=121845 GN=LOC103507006 PE=3 SV=1;tr|A0A1S4E987|A0A1S4E987_DIACI GTP cyclohydrolase 1 OS=Diaphorina citri OX=121845 GN=LOC103507006 PE=3 SV=1	2	6	6	6	39.6	26.755	68160	100770	9501.7	418550	104230	521080	Quantified	GO:0046654(BP:tetrahydrofolate biosynthetic process);GO:0003934(MF:GTP cyclohydrolase I activity)				PF01227(GTP cyclohydrolase I)
A0A1S3CXA8	Uncharacterized protein LOC103507066 isoform X1	LOC103507066		tr|A0A1S3CXA8|A0A1S3CXA8_DIACI	tr|A0A1S3CXA8|A0A1S3CXA8_DIACI Uncharacterized protein LOC103507066 isoform X1 OS=Diaphorina citri OX=121845 GN=LOC103507066 PE=4 SV=1	1	4	4	4	23.3	21.378	764380	606890	1250500	307000	568890	493640	Quantified
A0A1S3CXA9	Uncharacterized protein LOC103507057	LOC103507057		tr|A0A1S3CXA9|A0A1S3CXA9_DIACI	tr|A0A1S3CXA9|A0A1S3CXA9_DIACI Uncharacterized protein LOC103507057 OS=Diaphorina citri OX=121845 GN=LOC103507057 PE=4 SV=1	1	1	1	1	10.1	15.699	111600	76381	87573	138290	110620		Quantified
A0A1S3CXB4	Uncharacterized protein LOC103507065	LOC103507065		tr|A0A1S3CXB4|A0A1S3CXB4_DIACI	tr|A0A1S3CXB4|A0A1S3CXB4_DIACI Uncharacterized protein LOC103507065 OS=Diaphorina citri OX=121845 GN=LOC103507065 PE=4 SV=1	1	2	2	2	12.3	17.463	59170	80079	57900		53219	60858	Quantified
A0A1S3CXC2	Longitudinals lacking protein, isoforms H/M/V	LOC103507032		tr|A0A1S3CXC2|A0A1S3CXC2_DIACI;tr|A0A1S3D2G6|A0A1S3D2G6_DIACI	tr|A0A1S3CXC2|A0A1S3CXC2_DIACI Longitudinals lacking protein, isoforms H/M/V OS=Diaphorina citri OX=121845 GN=LOC103507032 PE=4 SV=1;tr|A0A1S3D2G6|A0A1S3D2G6_DIACI Longitudinals lacking protein, isoforms H/M/V OS=Diaphorina citri OX=121845 GN=LOC103510069	2	4	4	3	47.1	17.843	304320	354840	260650	425040	319400	377900	Quantified					PF00651(BTB/POZ domain)
A0A1S3CXD3	Innexin	LOC103507053	FUNCTION: Structural component of the gap junctions. {ECO:0000256|RuleBase:RU010713}.	tr|A0A1S3CXD3|A0A1S3CXD3_DIACI	tr|A0A1S3CXD3|A0A1S3CXD3_DIACI Innexin OS=Diaphorina citri OX=121845 GN=LOC103507053 PE=3 SV=1	1	2	2	2	5.9	44.959	103020	201710	142940	69212	138460	91502	Quantified	GO:0006811(BP:ion transport);GO:0005921(CC:gap junction);GO:0016021(CC:integral component of membrane);GO:0005886(CC:plasma membrane)			Cell membrane;Multi-pass membrane protein;Cell junction;gap junction;Membrane	PF00876(Innexin)
A0A1S3CXD9	Proteasome activator complex subunit 3	LOC103507118		tr|A0A1S3CXD9|A0A1S3CXD9_DIACI;tr|A0A1S3CXH8|A0A1S3CXH8_DIACI	tr|A0A1S3CXD9|A0A1S3CXD9_DIACI Proteasome activator complex subunit 3 OS=Diaphorina citri OX=121845 GN=LOC103507118 PE=3 SV=1;tr|A0A1S3CXH8|A0A1S3CXH8_DIACI Proteasome activator complex subunit 3-like OS=Diaphorina citri OX=121845 GN=LOC108251833 PE=3 SV=1	2	4	4	4	25.4	27.752	49711	113190	12633	47128	70782	54620	Quantified	GO:0008537(CC:proteasome activator complex)				PF02252(Proteasome activator pa28 beta subunit);PF02251(Proteasome activator pa28 alpha subunit)
A0A1S3CYN7	Transmembrane protein 70 homolog, mitochondrial	LOC103507080		tr|A0A1S3CYN7|A0A1S3CYN7_DIACI;tr|A0A1S3CXG5|A0A1S3CXG5_DIACI	tr|A0A1S3CYN7|A0A1S3CYN7_DIACI Transmembrane protein 70 homolog, mitochondrial OS=Diaphorina citri OX=121845 GN=LOC103507080 PE=3 SV=1;tr|A0A1S3CXG5|A0A1S3CXG5_DIACI Transmembrane protein 70 homolog, mitochondrial OS=Diaphorina citri OX=121845 GN=LOC103507	2	1	1	1	8.6	24.997		16467	14066		22560	13602	Quantified	GO:0016021(CC:integral component of membrane)				PF06979(Assembly, mitochondrial proton-transport ATP synth complex)
A0A1S3CXL1	Uncharacterized protein LOC103507166 isoform X3	LOC103507166		tr|A0A1S3CXL1|A0A1S3CXL1_DIACI;tr|A0A3Q0INV2|A0A3Q0INV2_DIACI;tr|A0A1S3CXH2|A0A1S3CXH2_DIACI	tr|A0A1S3CXL1|A0A1S3CXL1_DIACI Uncharacterized protein LOC103507166 isoform X3 OS=Diaphorina citri OX=121845 GN=LOC103507166 PE=4 SV=1;tr|A0A3Q0INV2|A0A3Q0INV2_DIACI Uncharacterized protein LOC103507166 isoform X2 OS=Diaphorina citri OX=121845 GN=LOC103507	3	2	2	2	12.5	27.842	55206	50917	39416	111350	74745	69223	Quantified
A0A1S3CXK0	Gastric triacylglycerol lipase-like isoform X1	LOC103507157		tr|A0A1S3CXK0|A0A1S3CXK0_DIACI	tr|A0A1S3CXK0|A0A1S3CXK0_DIACI Gastric triacylglycerol lipase-like isoform X1 OS=Diaphorina citri OX=121845 GN=LOC103507157 PE=3 SV=1	1	6	6	6	17.1	59.921	108000	95410	81352	251810	186700	152040	Quantified	GO:0006629(BP:lipid metabolic process)				PF04083(Partial alpha/beta-hydrolase lipase region)
A0A1S3CXK7	Proteasome subunit beta	LOC103507227		tr|A0A1S3CXK7|A0A1S3CXK7_DIACI	tr|A0A1S3CXK7|A0A1S3CXK7_DIACI Proteasome subunit beta OS=Diaphorina citri OX=121845 GN=LOC103507227 PE=3 SV=1	1	8	8	8	48.1	25.214	962840	856390	820570	705030	987560	1099300	Quantified	GO:0043161(BP:proteasome-mediated ubiquitin-dependent protein catabolic process);GO:0005737(CC:cytoplasm);GO:0005634(CC:nucleus);GO:0005839(CC:proteasome core complex);GO:0004298(MF:threonine-type endopeptidase activity)			Cytoplasm;Nucleus	PF00227(Proteasome subunit)
A0A1S3CXM0	Uncharacterized protein LOC103507258	LOC103507258		tr|A0A1S3CXM0|A0A1S3CXM0_DIACI	tr|A0A1S3CXM0|A0A1S3CXM0_DIACI Uncharacterized protein LOC103507258 OS=Diaphorina citri OX=121845 GN=LOC103507258 PE=4 SV=2	1	1	1	1	2.6	39.984				441250			Identified
A0A1S3CXM8	Eukaryotic translation initiation factor 3 subunit B-like	LOC103506534		tr|A0A1S3CXM8|A0A1S3CXM8_DIACI;tr|A0A3Q0IQV8|A0A3Q0IQV8_DIACI;tr|A0A1S3DS18|A0A1S3DS18_DIACI	tr|A0A1S3CXM8|A0A1S3CXM8_DIACI Eukaryotic translation initiation factor 3 subunit B-like OS=Diaphorina citri OX=121845 GN=LOC103506534 PE=4 SV=1;tr|A0A3Q0IQV8|A0A3Q0IQV8_DIACI Eukaryotic translation initiation factor 3 subunit B-like OS=Diaphorina citri OX	3	4	4	4	39	19.733	130970	118650	150600	419010	185710	252580	Quantified	GO:0005852(CC:eukaryotic translation initiation factor 3 complex);GO:0003743(MF:translation initiation factor activity);GO:0031369(MF:translation initiation factor binding)				PF08662(Eukaryotic translation initiation factor eIF2A)
A0A1S3CXN0	Uncharacterized protein LOC103507204	LOC103507204		tr|A0A1S3CXN0|A0A1S3CXN0_DIACI	tr|A0A1S3CXN0|A0A1S3CXN0_DIACI Uncharacterized protein LOC103507204 OS=Diaphorina citri OX=121845 GN=LOC103507204 PE=4 SV=2	1	2	2	2	3.2	85.929	62174	56734		255540	28700	39248	Quantified
A0A1S3CXN2	Succinate dehydrogenase cytochrome b560 subunit, mitochondrial-like	LOC103507211		tr|A0A1S3CXN2|A0A1S3CXN2_DIACI	tr|A0A1S3CXN2|A0A1S3CXN2_DIACI Succinate dehydrogenase cytochrome b560 subunit, mitochondrial-like OS=Diaphorina citri OX=121845 GN=LOC103507211 PE=4 SV=2	1	3	3	3	16.9	15.886	181470	228040	228780	562550	350940	325250	Quantified	GO:0006099(BP:tricarboxylic acid cycle);GO:0016021(CC:integral component of membrane);GO:0009055(MF:electron transfer activity);GO:0000104(MF:succinate dehydrogenase activity)			Membrane;Multi-pass membrane protein	PF01127(Succinate dehydrogenase/Fumarate reductase transmembrane subunit)
A0A1S3CXP2	Proteasome subunit alpha type	LOC103507226	FUNCTION: The proteasome is a multicatalytic proteinase complex which is characterized by its ability to cleave peptides with Arg, Phe, Tyr, Leu, and Glu adjacent to the leaving group at neutral or slightly basic pH. {ECO:0000256|RuleBase:RU000551}.	tr|A0A1S3CXP2|A0A1S3CXP2_DIACI	tr|A0A1S3CXP2|A0A1S3CXP2_DIACI Proteasome subunit alpha type OS=Diaphorina citri OX=121845 GN=LOC103507226 PE=3 SV=1	1	11	11	11	62.6	28.214	2426000	2205700	1856300	880350	1956400	1968800	Quantified	GO:0043161(BP:proteasome-mediated ubiquitin-dependent protein catabolic process);GO:0005737(CC:cytoplasm);GO:0005634(CC:nucleus);GO:0019773(CC:proteasome core complex, alpha-subunit complex);GO:0004298(MF:threonine-type endopeptidase activity)			Cytoplasm;Nucleus	PF00227(Proteasome subunit);PF10584(Proteasome subunit A N-terminal signature)
A0A1S3CXQ3	Uncharacterized protein LOC103507240	LOC103507240		tr|A0A1S3CXQ3|A0A1S3CXQ3_DIACI	tr|A0A1S3CXQ3|A0A1S3CXQ3_DIACI Uncharacterized protein LOC103507240 OS=Diaphorina citri OX=121845 GN=LOC103507240 PE=4 SV=1	1	5	5	5	47.4	16.417	1153900	1444100	974940	374340	453160	439480	Quantified					PF15430(Single domain von Willebrand factor type C)
A0A1S3CXR6	Phosphatidylinositol 5-phosphate 4-kinase type-2 alpha	LOC103507318		tr|A0A1S3CXR6|A0A1S3CXR6_DIACI;tr|A0A1S3DIE5|A0A1S3DIE5_DIACI;tr|A0A3Q0JHM5|A0A3Q0JHM5_DIACI	tr|A0A1S3CXR6|A0A1S3CXR6_DIACI Phosphatidylinositol 5-phosphate 4-kinase type-2 alpha OS=Diaphorina citri OX=121845 GN=LOC103507318 PE=4 SV=2;tr|A0A1S3DIE5|A0A1S3DIE5_DIACI Phosphatidylinositol 5-phosphate 4-kinase type-2 alpha OS=Diaphorina citri OX=12184	3	8	8	8	21.5	54.515	423470	589380	542540	746260	411240	423970	Quantified	GO:0005524(MF:ATP binding);GO:0016307(MF:phosphatidylinositol phosphate kinase activity)				PF01504(Phosphatidylinositol-4-phosphate 5-Kinase)
A0A1S3CXR9	Uncharacterized protein DDB_G0283357-like	LOC103507263		tr|A0A1S3CXR9|A0A1S3CXR9_DIACI	tr|A0A1S3CXR9|A0A1S3CXR9_DIACI Uncharacterized protein DDB_G0283357-like OS=Diaphorina citri OX=121845 GN=LOC103507263 PE=4 SV=1	1	2	2	2	16.7	32.32	297640	158210	204710	116520	213660	153210	Quantified
A0A1S3CXS3	Charged multivesicular body protein 4c isoform X1	LOC103507316		tr|A0A1S3CXS3|A0A1S3CXS3_DIACI	tr|A0A1S3CXS3|A0A1S3CXS3_DIACI Charged multivesicular body protein 4c isoform X1 OS=Diaphorina citri OX=121845 GN=LOC103507316 PE=3 SV=1	1	7	7	7	54.3	24.876	1496400	889790	696480	868400	607920	676160	Quantified	GO:0007034(BP:vacuolar transport)				PF03357(Snf7)
A0A1S3CXT5	Cold shock domain-containing protein CG9705-like	LOC103507296		tr|A0A1S3CXT5|A0A1S3CXT5_DIACI	tr|A0A1S3CXT5|A0A1S3CXT5_DIACI Cold shock domain-containing protein CG9705-like OS=Diaphorina citri OX=121845 GN=LOC103507296 PE=4 SV=1	1	2	2	2	41.4	15.537	462370	111060	91314	78242	94141	74378	Quantified	GO:0003676(MF:nucleic acid binding)				PF00313('Cold-shock' DNA-binding domain)
A0A1S3CXT6	Tyrosine-protein phosphatase non-receptor type 2-like	LOC103506615		tr|A0A1S3CXT6|A0A1S3CXT6_DIACI	tr|A0A1S3CXT6|A0A1S3CXT6_DIACI Tyrosine-protein phosphatase non-receptor type 2-like OS=Diaphorina citri OX=121845 GN=LOC103506615 PE=3 SV=1	1	2	2	2	5.8	52.955	14244	31285	29033	26728	30947	36373	Quantified	GO:0016021(CC:integral component of membrane);GO:0004725(MF:protein tyrosine phosphatase activity)				PF00102(Protein-tyrosine phosphatase)
A0A1S3CXT8	Succinate--CoA ligase [ADP-forming] subunit beta, mitochondrial	LOC103507361	FUNCTION: ATP-specific succinyl-CoA synthetase functions in the citric acid cycle (TCA), coupling the hydrolysis of succinyl-CoA to the synthesis of ATP and thus represents the only step of substrate-level phosphorylation in the TCA. The beta subunit provides nucleotide specificity of the enzyme and binds the substrate succinate, while the binding sites for coenzyme A and phosphate are found in t…	tr|A0A1S3CXT8|A0A1S3CXT8_DIACI	tr|A0A1S3CXT8|A0A1S3CXT8_DIACI Succinate--CoA ligase [ADP-forming] subunit beta, mitochondrial OS=Diaphorina citri OX=121845 GN=LOC103507361 PE=3 SV=1	1	20	20	20	61.9	47.682	12385000	14988000	16682000	23228000	22746000	23249000	Quantified	GO:0006099(BP:tricarboxylic acid cycle);GO:0005739(CC:mitochondrion);GO:0005524(MF:ATP binding);GO:0000287(MF:magnesium ion binding);GO:0004775(MF:succinate-CoA ligase (ADP-forming) activity)	K01903(NA)	ko00020(Citrate cycle (TCA cycle));ko00640(Propanoate metabolism);ko00660(C5-Branched dibasic acid metabolism);ko00720(Carbon fixation pathways in prokaryotes)	Mitochondrion	PF08442(ATP-grasp domain);PF00549(CoA-ligase)
A0A1S3CXU1	V-type proton ATPase subunit D	LOC103507362		tr|A0A1S3CXU1|A0A1S3CXU1_DIACI	tr|A0A1S3CXU1|A0A1S3CXU1_DIACI V-type proton ATPase subunit D OS=Diaphorina citri OX=121845 GN=LOC103507362 PE=3 SV=1	1	9	9	9	51.4	27.721	999040	942610	999280	1824700	1178300	1307900	Quantified	GO:0042626(MF:ATPase activity, coupled to transmembrane movement of substances)				PF01813(ATP synthase subunit D)
A0A1S3CXU9	Zinc finger protein 706-like isoform X1	LOC103507313		tr|A0A1S3CXU9|A0A1S3CXU9_DIACI	tr|A0A1S3CXU9|A0A1S3CXU9_DIACI Zinc finger protein 706-like isoform X1 OS=Diaphorina citri OX=121845 GN=LOC103507313 PE=4 SV=1	1	1	1	1	12.7	8.9162	74293	53577	29635		7600.1		Quantified				Cytoplasm;Nucleus	PF04419(4F5 protein family)
A0A1S3CXV3	Phospholipid scramblase	LOC103507317	FUNCTION: May mediate accelerated ATP-independent bidirectional transbilayer migration of phospholipids upon binding calcium ions that results in a loss of phospholipid asymmetry in the plasma membrane. {ECO:0000256|RuleBase:RU363116}.	tr|A0A1S3CXV3|A0A1S3CXV3_DIACI	tr|A0A1S3CXV3|A0A1S3CXV3_DIACI Phospholipid scramblase OS=Diaphorina citri OX=121845 GN=LOC103507317 PE=3 SV=1	1	4	4	4	17.4	26.294	886220	906370	648820	387330	690470	7259800	Quantified	GO:0017128(MF:phospholipid scramblase activity)				PF03803(Scramblase)
A0A1S3CXW6	ATP synthase-coupling factor 6, mitochondrial	LOC103507338	FUNCTION: Mitochondrial membrane ATP synthase (F(1)F(0) ATP synthase or Complex V) produces ATP from ADP in the presence of a proton gradient across the membrane which is generated by electron transport complexes of the respiratory chain. {ECO:0000256|PIRNR:PIRNR002455}.	tr|A0A1S3CXW6|A0A1S3CXW6_DIACI;tr|A0A3Q0IP69|A0A3Q0IP69_DIACI	tr|A0A1S3CXW6|A0A1S3CXW6_DIACI ATP synthase-coupling factor 6, mitochondrial OS=Diaphorina citri OX=121845 GN=LOC103507338 PE=3 SV=1;tr|A0A3Q0IP69|A0A3Q0IP69_DIACI ATP synthase-coupling factor 6, mitochondrial OS=Diaphorina citri OX=121845 GN=LOC103507341	2	3	3	3	31.1	11.921	17536000	11766000	11636000	21176000	14060000	12927000	Quantified	GO:0015986(BP:ATP synthesis coupled proton transport);GO:0000276(CC:mitochondrial proton-transporting ATP synthase complex, coupling factor F(o));GO:0015078(MF:proton transmembrane transporter activity)			Membrane;Mitochondrion;Mitochondrion inner membrane	PF05511(Mitochondrial ATP synthase coupling factor 6)
A0A1S3CXW7	Multiple inositol polyphosphate phosphatase 1-like	LOC103506667		tr|A0A1S3CXW7|A0A1S3CXW7_DIACI	tr|A0A1S3CXW7|A0A1S3CXW7_DIACI Multiple inositol polyphosphate phosphatase 1-like OS=Diaphorina citri OX=121845 GN=LOC103506667 PE=4 SV=1	1	2	2	2	13.4	20.291	125420	71613	92470	118320	99679	100220	Quantified					PF00328(Histidine phosphatase superfamily (branch 2))
A0A1S3CXX8	Transcription factor BTF3	LOC103507363		tr|A0A1S3CXX8|A0A1S3CXX8_DIACI;tr|Q0PXU9|Q0PXU9_DIACI	tr|A0A1S3CXX8|A0A1S3CXX8_DIACI Transcription factor BTF3 OS=Diaphorina citri OX=121845 GN=LOC103507363 PE=3 SV=1;tr|Q0PXU9|Q0PXU9_DIACI Transcription factor BTF3 OS=Diaphorina citri OX=121845 PE=2 SV=1	2	8	8	8	60.8	20.458	1968000	1385600	1215100	1122400	1710900	1553900	Quantified					PF01849(NAC domain)
A0A1S3CXY6	lactoylglutathione lyase	LOC103507437		tr|A0A1S3CXY6|A0A1S3CXY6_DIACI	tr|A0A1S3CXY6|A0A1S3CXY6_DIACI lactoylglutathione lyase OS=Diaphorina citri OX=121845 GN=LOC103507437 PE=3 SV=1	1	7	7	7	64.3	20.686	888150	840990	575740	1103200	682640	722540	Quantified	GO:0004462(MF:lactoylglutathione lyase activity);GO:0046872(MF:metal ion binding)				PF00903(Glyoxalase/Bleomycin resistance protein/Dioxygenase superfamily)
A0A1S3CXY8	Ester hydrolase C11orf54 homolog	LOC103507380		tr|A0A1S3CXY8|A0A1S3CXY8_DIACI	tr|A0A1S3CXY8|A0A1S3CXY8_DIACI Ester hydrolase C11orf54 homolog OS=Diaphorina citri OX=121845 GN=LOC103507380 PE=4 SV=1	1	1	1	1	27.4	8.1542	93642	66922	64147	26154	12180	41745	Quantified	GO:0005634(CC:nucleus);GO:0016787(MF:hydrolase activity)			Nucleus	PF08925(Domain of Unknown Function (DUF1907))
A0A1S3CY07	Regulator of microtubule dynamics protein 1 isoform X1	LOC103506718		tr|A0A1S3CY07|A0A1S3CY07_DIACI	tr|A0A1S3CY07|A0A1S3CY07_DIACI Regulator of microtubule dynamics protein 1 isoform X1 OS=Diaphorina citri OX=121845 GN=LOC103506718 PE=4 SV=1	1	6	6	6	23.6	36.695	455310	385400	361030	355820	354200	314270	Quantified
A0A1S3CY29	H(+)-transporting two-sector ATPase	LOC103507511		tr|A0A1S3CY29|A0A1S3CY29_DIACI	tr|A0A1S3CY29|A0A1S3CY29_DIACI H(+)-transporting two-sector ATPase OS=Diaphorina citri OX=121845 GN=LOC103507511 PE=3 SV=1	1	38	38	38	78.5	68.242	20713000	19704000	20310000	28414000	22602000	23312000	Quantified	GO:0046034(BP:ATP metabolic process);GO:0033180(CC:proton-transporting V-type ATPase, V1 domain);GO:0005524(MF:ATP binding);GO:0046961(MF:proton-transporting ATPase activity, rotational mechanism)	K02112(NA)	ko00190(Oxidative phosphorylation);ko00195(Photosynthesis)		PF02874(ATP synthase alpha/beta family, beta-barrel domain);PF16886(ATPsynthase alpha/beta subunit N-term extension);PF00006(ATP synthase alpha/beta family, nucleotide-binding domain)
A0A1S3CY39	Probable 4-aminobutyrate aminotransferase, mitochondrial	LOC103507520		tr|A0A1S3CY39|A0A1S3CY39_DIACI	tr|A0A1S3CY39|A0A1S3CY39_DIACI Probable 4-aminobutyrate aminotransferase, mitochondrial OS=Diaphorina citri OX=121845 GN=LOC103507520 PE=3 SV=1	1	4	4	4	56.3	19.871	608510	767300	992660	860470	845650	754740	Quantified	GO:0030170(MF:pyridoxal phosphate binding);GO:0008483(MF:transaminase activity)				PF00202(Aminotransferase class-III)
A0A1S3CY47	Lissencephaly-1 homolog	LOC103507528	FUNCTION: Positively regulates the activity of the minus-end directed microtubule motor protein dynein. May enhance dynein-mediated microtubule sliding by targeting dynein to the microtubule plus end. Required for several dynein- and microtubule-dependent processes. {ECO:0000256|HAMAP-Rule:MF_03141}.	tr|A0A1S3CY47|A0A1S3CY47_DIACI	tr|A0A1S3CY47|A0A1S3CY47_DIACI Lissencephaly-1 homolog OS=Diaphorina citri OX=121845 GN=LOC103507528 PE=3 SV=1	1	7	7	7	30.4	45.539	310010	777750	451760	583490	527120	573950	Quantified	GO:0051301(BP:cell division);GO:0000132(BP:establishment of mitotic spindle orientation);GO:0051012(BP:microtubule sliding);GO:0005623(CC:cell);GO:0005737(CC:cytoplasm);GO:0005874(CC:microtubule);GO:0005875(CC:microtubule associated complex);GO:0005815(CC:microtubule organizing center);GO:0070840(MF:dynein complex binding)			Cytoplasm;cytoskeleton;microtubule organizing center;centrosome	PF00400(WD domain, G-beta repeat)
A0A1S3CZH0	Trafficking protein particle complex subunit 2-like protein	LOC103507539		tr|A0A1S3CZH0|A0A1S3CZH0_DIACI;tr|A0A1S3CY52|A0A1S3CY52_DIACI	tr|A0A1S3CZH0|A0A1S3CZH0_DIACI Trafficking protein particle complex subunit 2-like protein OS=Diaphorina citri OX=121845 GN=LOC103507539 PE=3 SV=1;tr|A0A1S3CY52|A0A1S3CY52_DIACI Trafficking protein particle complex subunit 2-like protein OS=Diaphorina citr	2	1	1	1	16.3	9.7929	3599.4	25682	19734		23879	14611	Quantified	GO:0006888(BP:ER to Golgi vesicle-mediated transport);GO:0005737(CC:cytoplasm)			Cytoplasm;perinuclear region	PF04628(Sedlin, N-terminal conserved region)
A0A1S3CY59	Sarcalumenin	LOC103507509		tr|A0A1S3CY59|A0A1S3CY59_DIACI	tr|A0A1S3CY59|A0A1S3CY59_DIACI Sarcalumenin OS=Diaphorina citri OX=121845 GN=LOC103507509 PE=4 SV=1	1	20	20	20	35.3	87.033	4114800	3884400	3975300	6271100	4741400	4956800	Quantified	GO:0005525(MF:GTP binding)				PF16880(N-terminal EH-domain containing protein)
A0A1S3CY61	Lachesin-like	LOC103507544		tr|A0A1S3CY61|A0A1S3CY61_DIACI	tr|A0A1S3CY61|A0A1S3CY61_DIACI Lachesin-like OS=Diaphorina citri OX=121845 GN=LOC103507544 PE=4 SV=1	1	3	3	3	30.6	15.929	913760	731770	733360	358670	588990	409430	Quantified					PF07679(Immunoglobulin I-set domain)
A0A1S3CYA2	RNA-binding protein squid isoform X4	LOC103507559		tr|A0A1S3CYA2|A0A1S3CYA2_DIACI;tr|A0A1S3CY71|A0A1S3CY71_DIACI;tr|A0A1S3CY67|A0A1S3CY67_DIACI	tr|A0A1S3CYA2|A0A1S3CYA2_DIACI RNA-binding protein squid isoform X4 OS=Diaphorina citri OX=121845 GN=LOC103507559 PE=4 SV=1;tr|A0A1S3CY71|A0A1S3CY71_DIACI RNA-binding protein squid isoform X3 OS=Diaphorina citri OX=121845 GN=LOC103507559 PE=4 SV=1;tr|A0A1S	3	9	9	9	39.7	29.942	1652400	1839900	1135900	658450	1564700	1865300	Quantified	GO:0003729(MF:mRNA binding)				PF00076(RNA recognition motif. (a.k.a. RRM, RBD, or RNP domain))
A0A1S3CY85	Uncharacterized protein LOC103507527	LOC103507527		tr|A0A1S3CY85|A0A1S3CY85_DIACI	tr|A0A1S3CY85|A0A1S3CY85_DIACI Uncharacterized protein LOC103507527 OS=Diaphorina citri OX=121845 GN=LOC103507527 PE=4 SV=1	1	1	1	1	1.1	166.83	34122	31919	16161	38347	27263	41289	Quantified
A0A1S3CYB2	UDP-glucuronosyltransferase 2B31-like	LOC103507578		tr|A0A1S3CYB2|A0A1S3CYB2_DIACI	tr|A0A1S3CYB2|A0A1S3CYB2_DIACI UDP-glucuronosyltransferase 2B31-like OS=Diaphorina citri OX=121845 GN=LOC103507578 PE=4 SV=1	1	7	7	7	22.8	59.382	199670	216880	219540	474030	273030	316250	Quantified	GO:0016021(CC:integral component of membrane);GO:0016758(MF:transferase activity, transferring hexosyl groups)				PF00201(UDP-glucoronosyl and UDP-glucosyl transferase)
A0A1S3CYC2	Large ribosomal subunit protein mL53	LOC103507600		tr|A0A1S3CYC2|A0A1S3CYC2_DIACI	tr|A0A1S3CYC2|A0A1S3CYC2_DIACI Large ribosomal subunit protein mL53 OS=Diaphorina citri OX=121845 GN=LOC103507600 PE=3 SV=1	1	1	1	1	9.3	15.711	21001	17747	19936	7061.2	24626	31153	Quantified	GO:0005840(CC:ribosome)			Mitochondrion	PF10780(39S ribosomal protein L53/MRP-L53)
A0A3Q0IPQ9	FAD-dependent oxidoreductase domain-containing protein 1-like isoform X1	LOC103507641		tr|A0A3Q0IPQ9|A0A3Q0IPQ9_DIACI;tr|A0A1S3CYC5|A0A1S3CYC5_DIACI;tr|A0A3Q0IUE4|A0A3Q0IUE4_DIACI	tr|A0A3Q0IPQ9|A0A3Q0IPQ9_DIACI FAD-dependent oxidoreductase domain-containing protein 1-like isoform X1 OS=Diaphorina citri OX=121845 GN=LOC103507641 PE=4 SV=1;tr|A0A1S3CYC5|A0A1S3CYC5_DIACI FAD-dependent oxidoreductase domain-containing protein 1-like iso	3	6	6	6	14.7	64.15	245470	199500	197600	370080	248810	263460	Quantified	GO:0016491(MF:oxidoreductase activity)				PF01266(FAD dependent oxidoreductase)
A0A1S3CYD2	Thioredoxin-like protein 1	LOC103507655		tr|A0A1S3CYD2|A0A1S3CYD2_DIACI	tr|A0A1S3CYD2|A0A1S3CYD2_DIACI Thioredoxin-like protein 1 OS=Diaphorina citri OX=121845 GN=LOC103507655 PE=4 SV=1	1	6	6	6	33.8	31.71	863880	582270	561700	829080	740230	667890	Quantified	GO:0045454(BP:cell redox homeostasis);GO:0005623(CC:cell)				PF06201(PITH domain);PF00085(Thioredoxin)
A0A1S3CYD5	Pancreatic triacylglycerol lipase-like	LOC103507659		tr|A0A1S3CYD5|A0A1S3CYD5_DIACI	tr|A0A1S3CYD5|A0A1S3CYD5_DIACI Pancreatic triacylglycerol lipase-like OS=Diaphorina citri OX=121845 GN=LOC103507659 PE=3 SV=2	1	3	3	3	6	88.743	1212900	1237200	1758100	499030	1103000	961170	Quantified	GO:0006629(BP:lipid metabolic process);GO:0005576(CC:extracellular region);GO:0004806(MF:triglyceride lipase activity);GO:0070569(MF:uridylyltransferase activity)			Secreted	PF01477(PLAT/LH2 domain);PF01704(UTP--glucose-1-phosphate uridylyltransferase);PF00151(Lipase)
A0A1S3CYD8	CTP synthase (glutamine hydrolyzing)	LOC103506917		tr|A0A1S3CYD8|A0A1S3CYD8_DIACI	tr|A0A1S3CYD8|A0A1S3CYD8_DIACI CTP synthase (glutamine hydrolyzing) OS=Diaphorina citri OX=121845 GN=LOC103506917 PE=3 SV=1	1	2	2	2	12.1	33.081	72810	78792	82155	8659.5	68479	98672	Quantified	GO:0006241(BP:CTP biosynthetic process);GO:0006541(BP:glutamine metabolic process);GO:0003883(MF:CTP synthase activity)				PF00117(Glutamine amidotransferase class-I)
A0A1S3CYF4	Calcium load-activated calcium channel	LOC103507642	FUNCTION: Calcium-selective channel required to prevent calcium stores from overfilling. {ECO:0000256|PIRNR:PIRNR023322}.	tr|A0A1S3CYF4|A0A1S3CYF4_DIACI	tr|A0A1S3CYF4|A0A1S3CYF4_DIACI Calcium load-activated calcium channel OS=Diaphorina citri OX=121845 GN=LOC103507642 PE=3 SV=1	1	2	2	2	13.7	20.805	327460	282940	69314	935120	361990	473540	Quantified	GO:0032469(BP:endoplasmic reticulum calcium ion homeostasis);GO:0030176(CC:integral component of endoplasmic reticulum membrane);GO:0005262(MF:calcium channel activity)			Endoplasmic reticulum membrane;Multi-pass membrane protein;Membrane	PF01956(Integral membrane protein DUF106)
A0A1S3CYF9	Chorion class high-cysteine HCB protein 13-like	LOC103507681		tr|A0A1S3CYF9|A0A1S3CYF9_DIACI	tr|A0A1S3CYF9|A0A1S3CYF9_DIACI Chorion class high-cysteine HCB protein 13-like OS=Diaphorina citri OX=121845 GN=LOC103507681 PE=4 SV=1	1	4	4	4	72.1	10.596	1866100	1537300	2166600	224490	1496800	840410	Quantified
A0A1S3CYJ0	Dynein light chain	LOC103507755		tr|A0A1S3CYJ0|A0A1S3CYJ0_DIACI	tr|A0A1S3CYJ0|A0A1S3CYJ0_DIACI Dynein light chain OS=Diaphorina citri OX=121845 GN=LOC103507755 PE=3 SV=1	1	4	4	4	67.4	10.374	346850	559220	536250	443820	629160	668570	Quantified	GO:0007017(BP:microtubule-based process);GO:0005737(CC:cytoplasm);GO:0030286(CC:dynein complex);GO:0005874(CC:microtubule);GO:0003774(MF:motor activity)			Cytoplasm;cytoskeleton	PF01221(Dynein light chain type 1)
A0A1S3CYJ4	Ras-related protein Rab-35	LOC103507763		tr|A0A1S3CYJ4|A0A1S3CYJ4_DIACI	tr|A0A1S3CYJ4|A0A1S3CYJ4_DIACI Ras-related protein Rab-35 OS=Diaphorina citri OX=121845 GN=LOC103507763 PE=4 SV=1	1	2	2	2	31.4	11.83	25762	43328	65429	44317	41011	49689	Quantified	GO:0005525(MF:GTP binding);GO:0003924(MF:GTPase activity)				PF00071(Ras family)
A0A1S3CYJ8	ER membrane protein complex subunit 3	LOC103507773		tr|A0A1S3CYJ8|A0A1S3CYJ8_DIACI;tr|A0A1S3CYQ5|A0A1S3CYQ5_DIACI	tr|A0A1S3CYJ8|A0A1S3CYJ8_DIACI ER membrane protein complex subunit 3 OS=Diaphorina citri OX=121845 GN=LOC103507773 PE=3 SV=1;tr|A0A1S3CYQ5|A0A1S3CYQ5_DIACI ER membrane protein complex subunit 3 OS=Diaphorina citri OX=121845 GN=LOC103507776 PE=3 SV=1	2	2	2	2	12.8	27.421	53669	61108	4633.6	75726	64383	67699	Quantified	GO:0016021(CC:integral component of membrane)			Membrane;Multi-pass membrane protein	PF01956(Integral membrane protein DUF106)
A0A1S3CYK1	Diamine acetyltransferase 2 isoform X4	LOC103507027		tr|A0A1S3CYK1|A0A1S3CYK1_DIACI;tr|A0A3Q0INC5|A0A3Q0INC5_DIACI;tr|A0A1S4E9A1|A0A1S4E9A1_DIACI;tr|A0A3Q0ITX0|A0A3Q0ITX0_DIACI	tr|A0A1S3CYK1|A0A1S3CYK1_DIACI Diamine acetyltransferase 2 isoform X4 OS=Diaphorina citri OX=121845 GN=LOC103507027 PE=4 SV=1;tr|A0A3Q0INC5|A0A3Q0INC5_DIACI Diamine acetyltransferase 2 isoform X1 OS=Diaphorina citri OX=121845 GN=LOC103507027 PE=4 SV=1;tr|A	4	3	3	3	30.9	18.644	188510	264040	168850	280120	374210	82301	Quantified	GO:0008080(MF:N-acetyltransferase activity)				PF00583(Acetyltransferase (GNAT) family)
A0A1S3CYL5	Piwi-like protein Ago3	LOC103507780		tr|A0A1S3CYL5|A0A1S3CYL5_DIACI	tr|A0A1S3CYL5|A0A1S3CYL5_DIACI Piwi-like protein Ago3 OS=Diaphorina citri OX=121845 GN=LOC103507780 PE=3 SV=1	1	3	3	3	5.4	99.874	17408	26558	17169	31576	21603	26130	Quantified	GO:0031047(BP:gene silencing by RNA);GO:0003676(MF:nucleic acid binding)				PF02171(Piwi domain);PF02170(PAZ domain)
A0A3Q0IQ79	NAD(+) kinase	LOC103507804		tr|A0A3Q0IQ79|A0A3Q0IQ79_DIACI;tr|A0A1S3CYM6|A0A1S3CYM6_DIACI;tr|A0A1S3CYQ9|A0A1S3CYQ9_DIACI;tr|A0A1S3CYT3|A0A1S3CYT3_DIACI;tr|A0A1S3CYN8|A0A1S3CYN8_DIACI;tr|A0A1S3CYM1|A0A1S3CYM1_DIACI;tr|A0A3Q0IQ14|A0A3Q0IQ14_DIACI;tr|A0A1S3CZZ4|A0A1S3CZZ4_DIACI;tr|A0A1S3CYQ4|A0A1S3CYQ4_DIACI;tr|A0A1S3CYS8|A0A1S3CYS8_DIACI;tr|A0A1S3CYN3|A0A1S3CYN3_DIACI;tr|A0A1S3CYL6|A0A1S3CYL6_DIACI	tr|A0A3Q0IQ79|A0A3Q0IQ79_DIACI NAD(+) kinase OS=Diaphorina citri OX=121845 GN=LOC103507804 PE=3 SV=1;tr|A0A1S3CYM6|A0A1S3CYM6_DIACI NAD(+) kinase OS=Diaphorina citri OX=121845 GN=LOC103507804 PE=3 SV=1;tr|A0A1S3CYQ9|A0A1S3CYQ9_DIACI NAD(+) kinase OS=Diapho	12	1	1	1	4.1	43.444		121850	31252	200920	55922	59712	Quantified	GO:0019674(BP:NAD metabolic process);GO:0006741(BP:NADP biosynthetic process);GO:0003951(MF:NAD+ kinase activity)	K00858(NA)	ko00760(Nicotinate and nicotinamide metabolism);ko01240(Biosynthesis of cofactors)		PF01513(ATP-NAD kinase)
A0A1S3CYN9	Uncharacterized protein LOC103507787	LOC103507787		tr|A0A1S3CYN9|A0A1S3CYN9_DIACI	tr|A0A1S3CYN9|A0A1S3CYN9_DIACI Uncharacterized protein LOC103507787 OS=Diaphorina citri OX=121845 GN=LOC103507787 PE=4 SV=1	1	4	4	4	23.3	21.843	3029000	866420	5491600	1832300	1663500	4448500	Quantified
A0A1S3CYP5	Vacuolar protein sorting-associated protein 37C isoform X1	LOC103507756		tr|A0A1S3CYP5|A0A1S3CYP5_DIACI	tr|A0A1S3CYP5|A0A1S3CYP5_DIACI Vacuolar protein sorting-associated protein 37C isoform X1 OS=Diaphorina citri OX=121845 GN=LOC103507756 PE=3 SV=1	1	2	2	2	12.8	26.124	166190	107010	112980	174690	1305.5	2830.3	Quantified	GO:0032509(BP:endosome transport via multivesicular body sorting pathway);GO:0015031(BP:protein transport);GO:0000813(CC:ESCRT I complex)			Late endosome membrane;Peripheral membrane protein	PF07200(Modifier of rudimentary (Mod(r)) protein)
A0A1S3CYP9	Transferrin-like	LOC103507801		tr|A0A1S3CYP9|A0A1S3CYP9_DIACI	tr|A0A1S3CYP9|A0A1S3CYP9_DIACI Transferrin-like OS=Diaphorina citri OX=121845 GN=LOC103507801 PE=4 SV=1	1	13	2	2	59.9	31.514	257470	1316500	934140	321620	1935600	1961000	Quantified					PF00405(Transferrin)
A0A1S3CYQ0	Ras-related protein Rab-35-like	LOC103507764		tr|A0A1S3CYQ0|A0A1S3CYQ0_DIACI	tr|A0A1S3CYQ0|A0A1S3CYQ0_DIACI Ras-related protein Rab-35-like OS=Diaphorina citri OX=121845 GN=LOC103507764 PE=4 SV=1	1	1	1	1	11.7	13.688	8061.2	32278	34754	11908	22193	43972	Quantified	GO:0005525(MF:GTP binding);GO:0003924(MF:GTPase activity)				PF00071(Ras family)
A0A1S3CYR1	ADP-ribosylation factor 6	LOC103507122		tr|A0A1S3CYR1|A0A1S3CYR1_DIACI	tr|A0A1S3CYR1|A0A1S3CYR1_DIACI ADP-ribosylation factor 6 OS=Diaphorina citri OX=121845 GN=LOC103507122 PE=3 SV=1	1	4	4	4	34.9	20.142	109360	144520	162800	217330	164290	160610	Quantified	GO:0005525(MF:GTP binding);GO:0003924(MF:GTPase activity)				PF00025(ADP-ribosylation factor family)
A0A1S3CYS1	Proline-rich proteoglycan 2-like	LOC103507857		tr|A0A1S3CYS1|A0A1S3CYS1_DIACI	tr|A0A1S3CYS1|A0A1S3CYS1_DIACI Proline-rich proteoglycan 2-like OS=Diaphorina citri OX=121845 GN=LOC103507857 PE=4 SV=1	1	2	2	2	8.5	37.844	34595	47434	31000	12443	23402	46093	Quantified
A0A1S4ERK7	Uncharacterized protein LOC103523797	LOC103523797		tr|A0A1S4ERK7|A0A1S4ERK7_DIACI;tr|A0A1S3CYT5|A0A1S3CYT5_DIACI	tr|A0A1S4ERK7|A0A1S4ERK7_DIACI Uncharacterized protein LOC103523797 OS=Diaphorina citri OX=121845 GN=LOC103523797 PE=4 SV=1;tr|A0A1S3CYT5|A0A1S3CYT5_DIACI Uncharacterized protein LOC103507178 isoform X1 OS=Diaphorina citri OX=121845 GN=LOC103507178 PE=4 SV	2	1	1	1	5.4	41.895	2575200	2155200	8046.3	4687200		3019400	Quantified
A0A6G5VBN5	ATP-binding cassette transporter	ABCG8		tr|A0A6G5VBN5|A0A6G5VBN5_DIACI;tr|A0A1S3CYT8|A0A1S3CYT8_DIACI	tr|A0A6G5VBN5|A0A6G5VBN5_DIACI ATP-binding cassette transporter OS=Diaphorina citri OX=121845 GN=ABCG8 PE=2 SV=1;tr|A0A1S3CYT8|A0A1S3CYT8_DIACI ATP-binding cassette sub-family G member 5 OS=Diaphorina citri OX=121845 GN=LOC103507184 PE=2 SV=2	2	6	6	6	11.7	66.637	150600	111030	126920	205010	173990	214520	Quantified		K09810(NA)	ko02010(ABC transporters)	Membrane;Multi-pass membrane protein	PF00005(ABC transporter);PF01061(ABC-2 type transporter)
A0A1S3CYU3	L-dopachrome tautomerase yellow-f2-like	LOC103507908		tr|A0A1S3CYU3|A0A1S3CYU3_DIACI;tr|A0A1S3CZ05|A0A1S3CZ05_DIACI;tr|Q0PWU0|Q0PWU0_DIACI	tr|A0A1S3CYU3|A0A1S3CYU3_DIACI L-dopachrome tautomerase yellow-f2-like OS=Diaphorina citri OX=121845 GN=LOC103507908 PE=3 SV=1;tr|A0A1S3CZ05|A0A1S3CZ05_DIACI L-dopachrome tautomerase yellow-f2-like OS=Diaphorina citri OX=121845 GN=LOC103507909 PE=3 SV=1;tr	3	16	16	6	55.6	46.678	3285400	3320600	2613800	1488500	1528200	1107600	Quantified					PF03022(Major royal jelly protein)
A0A3Q0IVQ9	Uncharacterized protein LOC103507921 isoform X2	LOC103507921		tr|A0A3Q0IVQ9|A0A3Q0IVQ9_DIACI;tr|A0A1S3CYV6|A0A1S3CYV6_DIACI	tr|A0A3Q0IVQ9|A0A3Q0IVQ9_DIACI Uncharacterized protein LOC103507921 isoform X2 OS=Diaphorina citri OX=121845 GN=LOC103507921 PE=4 SV=1;tr|A0A1S3CYV6|A0A1S3CYV6_DIACI Uncharacterized protein LOC103507921 isoform X1 OS=Diaphorina citri OX=121845 GN=LOC103507	2	9	9	9	73.7	16.089	2723700	2122000	1889700	1423700	1542000	1720100	Quantified
A0A1S3CYX2	Cuticle protein 7-like	LOC103507855		tr|A0A1S3CYX2|A0A1S3CYX2_DIACI	tr|A0A1S3CYX2|A0A1S3CYX2_DIACI Cuticle protein 7-like OS=Diaphorina citri OX=121845 GN=LOC103507855 PE=4 SV=1	1	6	6	6	60.4	14.954	3207500	2440100	2494700	1876500	1289400	1452400	Quantified	GO:0042302(MF:structural constituent of cuticle)				PF00379(Insect cuticle protein)
A0A1S3CYX4	Protein phosphatase 1 regulatory subunit 7	LOC103507907		tr|A0A1S3CYX4|A0A1S3CYX4_DIACI	tr|A0A1S3CYX4|A0A1S3CYX4_DIACI Protein phosphatase 1 regulatory subunit 7 OS=Diaphorina citri OX=121845 GN=LOC103507907 PE=4 SV=1	1	5	5	5	16.4	40.01	259890	155110	162450	273790	166790	209880	Quantified					PF13855(Leucine rich repeat);PF14580(Leucine-rich repeat);PF12799(Leucine Rich repeats (2 copies))
A0A1S3CYY1	DDB1- and CUL4-associated factor 7	LOC103507876		tr|A0A1S3CYY1|A0A1S3CYY1_DIACI	tr|A0A1S3CYY1|A0A1S3CYY1_DIACI DDB1- and CUL4-associated factor 7 OS=Diaphorina citri OX=121845 GN=LOC103507876 PE=4 SV=1	1	4	4	4	18	39.362	506970	423160	249260	100050	250600	338530	Quantified
A0A1S3CYZ8	Alpha-taxilin isoform X1	LOC103507936		tr|A0A1S3CYZ8|A0A1S3CYZ8_DIACI	tr|A0A1S3CYZ8|A0A1S3CYZ8_DIACI Alpha-taxilin isoform X1 OS=Diaphorina citri OX=121845 GN=LOC103507936 PE=3 SV=1	1	2	2	2	4.4	88.059	30768	31501	27000	1073.2	8702.8	6520	Quantified	GO:0019905(MF:syntaxin binding)				PF09728(Myosin-like coiled-coil protein)
A0A1S3CZ07	Peroxiredoxin-5	LOC103507956	FUNCTION: Thiol-specific peroxidase that catalyzes the reduction of hydrogen peroxide and organic hydroperoxides to water and alcohols, respectively. Plays a role in cell protection against oxidative stress by detoxifying peroxides. {ECO:0000256|RuleBase:RU366011}.	tr|A0A1S3CZ07|A0A1S3CZ07_DIACI;tr|A0A3Q0IQB7|A0A3Q0IQB7_DIACI	tr|A0A1S3CZ07|A0A1S3CZ07_DIACI Peroxiredoxin-5 OS=Diaphorina citri OX=121845 GN=LOC103507956 PE=3 SV=1;tr|A0A3Q0IQB7|A0A3Q0IQB7_DIACI thioredoxin-dependent peroxiredoxin OS=Diaphorina citri OX=121845 GN=LOC103507966 PE=3 SV=1	2	11	11	11	75.3	18.927	9391900	7968500	6642600	10309000	11043000	11176000	Quantified	GO:0045454(BP:cell redox homeostasis);GO:0005623(CC:cell);GO:0004601(MF:peroxidase activity);GO:0051920(MF:peroxiredoxin activity)			Peroxisome matrix	PF08534(Redoxin)
A0A1S3CZ10	Proteasome subunit beta	LOC103507970		tr|A0A1S3CZ10|A0A1S3CZ10_DIACI	tr|A0A1S3CZ10|A0A1S3CZ10_DIACI Proteasome subunit beta OS=Diaphorina citri OX=121845 GN=LOC103507970 PE=3 SV=1	1	6	6	6	22.2	31.264	365170	393730	402630	565280	444990	482220	Quantified	GO:0051603(BP:proteolysis involved in cellular protein catabolic process);GO:0005737(CC:cytoplasm);GO:0005634(CC:nucleus);GO:0005839(CC:proteasome core complex);GO:0004298(MF:threonine-type endopeptidase activity)			Cytoplasm;Nucleus	PF00227(Proteasome subunit)
A0A3Q0IQF5	eIF-4F 25 kDa subunit	LOC103508014		tr|A0A3Q0IQF5|A0A3Q0IQF5_DIACI;tr|A0A1S3CZ14|A0A1S3CZ14_DIACI;tr|A0A3Q0IV50|A0A3Q0IV50_DIACI	tr|A0A3Q0IQF5|A0A3Q0IQF5_DIACI eIF-4F 25 kDa subunit OS=Diaphorina citri OX=121845 GN=LOC103508014 PE=3 SV=1;tr|A0A1S3CZ14|A0A1S3CZ14_DIACI eIF-4F 25 kDa subunit OS=Diaphorina citri OX=121845 GN=LOC103508014 PE=3 SV=1;tr|A0A3Q0IV50|A0A3Q0IV50_DIACI eIF-4F	3	7	7	7	55.9	21.493	339290	521890	409340	554480	472040	533980	Quantified	GO:0005737(CC:cytoplasm);GO:0003743(MF:translation initiation factor activity)				PF01652(Eukaryotic initiation factor 4E)
A0A1S3CZ45	Uncharacterized protein LOC103508016	LOC103508016		tr|A0A1S3CZ45|A0A1S3CZ45_DIACI	tr|A0A1S3CZ45|A0A1S3CZ45_DIACI Uncharacterized protein LOC103508016 OS=Diaphorina citri OX=121845 GN=LOC103508016 PE=4 SV=1	1	10	10	10	66.1	12.916	39291000	20713000	22387000	50200000	31185000	40153000	Quantified
A0A1S3CZ55	Prolyl endopeptidase	LOC103508036		tr|A0A1S3CZ55|A0A1S3CZ55_DIACI	tr|A0A1S3CZ55|A0A1S3CZ55_DIACI Prolyl endopeptidase OS=Diaphorina citri OX=121845 GN=LOC103508036 PE=3 SV=1	1	11	11	11	21.1	87.396	364270	464000	278510	603310	355130	525730	Quantified	GO:0004252(MF:serine-type endopeptidase activity);GO:0070008(MF:serine-type exopeptidase activity)				PF00326(Prolyl oligopeptidase family);PF02897(Prolyl oligopeptidase, N-terminal beta-propeller domain)
A0A1S3CZ62	Myosin light chain alkali	LOC103508000		tr|A0A1S3CZ62|A0A1S3CZ62_DIACI	tr|A0A1S3CZ62|A0A1S3CZ62_DIACI Myosin light chain alkali OS=Diaphorina citri OX=121845 GN=LOC103508000 PE=4 SV=1	1	8	8	8	73.9	17.928	43023000	21420000	27961000	46040000	27448000	21320000	Quantified	GO:0005509(MF:calcium ion binding)
A0A1S3CZ68	Small ribosomal subunit protein uS17	LOC103508035		tr|A0A1S3CZ68|A0A1S3CZ68_DIACI;tr|A0A1S4EAV4|A0A1S4EAV4_DIACI	tr|A0A1S3CZ68|A0A1S3CZ68_DIACI Small ribosomal subunit protein uS17 OS=Diaphorina citri OX=121845 GN=LOC103508035 PE=3 SV=1;tr|A0A1S4EAV4|A0A1S4EAV4_DIACI Small ribosomal subunit protein uS17 OS=Diaphorina citri OX=121845 GN=LOC103508035 PE=3 SV=1	2	7	7	7	40.8	17.766	1623200	1596700	1646300	3377000	2148300	2552300	Quantified	GO:0006412(BP:translation);GO:0005840(CC:ribosome);GO:0003735(MF:structural constituent of ribosome)				PF16205(Ribosomal_S17 N-terminal);PF00366(Ribosomal protein S17)
A0A1S3CZ78	Short-chain dehydrogenase/reductase family 16C member 6	LOC103508015		tr|A0A1S3CZ78|A0A1S3CZ78_DIACI	tr|A0A1S3CZ78|A0A1S3CZ78_DIACI Short-chain dehydrogenase/reductase family 16C member 6 OS=Diaphorina citri OX=121845 GN=LOC103508015 PE=4 SV=1	1	4	2	2	27.9	15.378	162130	148020	130140	249700	212090	161830	Quantified	GO:0016491(MF:oxidoreductase activity)				PF00106(short chain dehydrogenase)
A0A1S3CZ88	Phenoloxidase 1-like	LOC103508125		tr|A0A1S3CZ88|A0A1S3CZ88_DIACI	tr|A0A1S3CZ88|A0A1S3CZ88_DIACI Phenoloxidase 1-like OS=Diaphorina citri OX=121845 GN=LOC103508125 PE=4 SV=1	1	6	6	6	11.9	77.733	8756600	6027100	4377700	3274000	5868700	6335000	Quantified					PF03723(Hemocyanin, ig-like domain);PF00026(Eukaryotic aspartyl protease);PF00372(Hemocyanin, copper containing domain)
A0A1S3CZ92	Spectrin beta chain	LOC103507435		tr|A0A1S3CZ92|A0A1S3CZ92_DIACI	tr|A0A1S3CZ92|A0A1S3CZ92_DIACI Spectrin beta chain OS=Diaphorina citri OX=121845 GN=LOC103507435 PE=3 SV=1	1	96	96	96	57.1	266.96	14195000	13026000	14019000	18482000	13369000	14382000	Quantified	GO:0051693(BP:actin filament capping);GO:0008091(CC:spectrin);GO:0003779(MF:actin binding);GO:0005543(MF:phospholipid binding);GO:0005200(MF:structural constituent of cytoskeleton)				PF00307(Calponin homology (CH) domain);PF00435(Spectrin repeat);PF15410(Pleckstrin homology domain)
A0A1S3CZ93	NEDD8-activating enzyme E1 regulatory subunit	LOC103508129		tr|A0A1S3CZ93|A0A1S3CZ93_DIACI	tr|A0A1S3CZ93|A0A1S3CZ93_DIACI NEDD8-activating enzyme E1 regulatory subunit OS=Diaphorina citri OX=121845 GN=LOC103508129 PE=3 SV=1	1	9	9	9	25.4	60.905	200540	247940	279550	411370	308980	324950	Quantified	GO:0045116(BP:protein neddylation);GO:0019781(MF:NEDD8 activating enzyme activity)				PF00899(ThiF family)
A0A1S3CZ97	Inositol-1-monophosphatase	LOC103508140		tr|A0A1S3CZ97|A0A1S3CZ97_DIACI;tr|A0A1S3CZR0|A0A1S3CZR0_DIACI	tr|A0A1S3CZ97|A0A1S3CZ97_DIACI Inositol-1-monophosphatase OS=Diaphorina citri OX=121845 GN=LOC103508140 PE=3 SV=1;tr|A0A1S3CZR0|A0A1S3CZR0_DIACI Inositol monophosphatase 1-like OS=Diaphorina citri OX=121845 GN=LOC103508285 PE=3 SV=1	2	6	6	6	45.2	21.247	532640	766290	951580	1217300	938700	1092300	Quantified	GO:0006021(BP:inositol biosynthetic process);GO:0046855(BP:inositol phosphate dephosphorylation);GO:0046854(BP:phosphatidylinositol phosphorylation);GO:0008934(MF:inositol monophosphate 1-phosphatase activity);GO:0052832(MF:inositol monophosphate 3-phosphatase activity);GO:0052833(MF:inositol monophosphate 4-phosphatase activity);GO:0046872(MF:metal ion binding)				PF00459(Inositol monophosphatase family)
A0A1S3CZA0	Uncharacterized protein LOC103508051 isoform X1	LOC103508051		tr|A0A1S3CZA0|A0A1S3CZA0_DIACI;tr|A0A3Q0IQK1|A0A3Q0IQK1_DIACI;tr|A0A1S3CZ71|A0A1S3CZ71_DIACI;tr|A0A1S3DP27|A0A1S3DP27_DIACI	tr|A0A1S3CZA0|A0A1S3CZA0_DIACI Uncharacterized protein LOC103508051 isoform X1 OS=Diaphorina citri OX=121845 GN=LOC103508051 PE=3 SV=1;tr|A0A3Q0IQK1|A0A3Q0IQK1_DIACI Protein-L-isoaspartate(D-aspartate) O-methyltransferase-like OS=Diaphorina citri OX=121845	4	8	8	7	23.3	63.219	936630	1041200	694020	1727100	1096300	1452100	Quantified	GO:0004719(MF:protein-L-isoaspartate (D-aspartate) O-methyltransferase activity)				PF01135(Protein-L-isoaspartate(D-aspartate) O-methyltransferase (PCMT))
A0A1S3CZA5	Heat shock protein 83	LOC103508055		tr|A0A1S3CZA5|A0A1S3CZA5_DIACI	tr|A0A1S3CZA5|A0A1S3CZA5_DIACI Heat shock protein 83 OS=Diaphorina citri OX=121845 GN=LOC103508055 PE=3 SV=1	1	25	25	14	54.9	83.225	8353600	6869000	7487600	10270000	5507100	6242200	Quantified	GO:0006457(BP:protein folding);GO:0005524(MF:ATP binding);GO:0051082(MF:unfolded protein binding)	K04079(NA)	ko04141(Protein processing in endoplasmic reticulum);ko04151(PI3K-Akt signaling pathway);ko04217(Necroptosis)		PF00183(Hsp90 protein);PF02518(Histidine kinase-, DNA gyrase B-, and HSP90-like ATPase)
A0A1S3CZB2	Activating signal cointegrator 1 complex subunit 2 homolog	LOC103508170		tr|A0A1S3CZB2|A0A1S3CZB2_DIACI	tr|A0A1S3CZB2|A0A1S3CZB2_DIACI Activating signal cointegrator 1 complex subunit 2 homolog OS=Diaphorina citri OX=121845 GN=LOC103508170 PE=4 SV=1	1	9	9	9	48.4	39.228	1695900	1327600	1493400	1587700	1178300	959010	Quantified
A0A1S3CZB7	Ankyrin-3-like	LOC103508174		tr|A0A1S3CZB7|A0A1S3CZB7_DIACI;tr|A0A3Q0JC46|A0A3Q0JC46_DIACI;tr|A0A1S3DIR6|A0A1S3DIR6_DIACI	tr|A0A1S3CZB7|A0A1S3CZB7_DIACI Ankyrin-3-like OS=Diaphorina citri OX=121845 GN=LOC103508174 PE=4 SV=1	3	10	8	5	26.2	72.858	213360	257330	241330	269270	264660	255350	Quantified					PF13857(Ankyrin repeats (many copies));PF13637(Ankyrin repeats (many copies));PF12796(Ankyrin repeats (3 copies));PF13606(Ankyrin repeat);PF00023(Ankyrin repeat)
A0A1S3CZC3	Inter-alpha-trypsin inhibitor heavy chain H6-like	LOC103508164		tr|A0A1S3CZC3|A0A1S3CZC3_DIACI	tr|A0A1S3CZC3|A0A1S3CZC3_DIACI Inter-alpha-trypsin inhibitor heavy chain H6-like OS=Diaphorina citri OX=121845 GN=LOC103508164 PE=4 SV=2	1	4	1	1	40.8	17.196	269700	300670	288610	659720	508230	518800	Quantified					PF08487(Vault protein inter-alpha-trypsin domain)
A0A1S3CZD2	ATPase ASNA1 homolog	LOC103508199	FUNCTION: ATPase required for the post-translational delivery of tail-anchored (TA) proteins to the endoplasmic reticulum. Recognizes and selectively binds the transmembrane domain of TA proteins in the cytosol. This complex then targets to the endoplasmic reticulum by membrane-bound receptors, where the tail-anchored protein is released for insertion. This process is regulated by ATP binding and…	tr|A0A1S3CZD2|A0A1S3CZD2_DIACI;tr|A0A3Q0JL26|A0A3Q0JL26_DIACI	tr|A0A1S3CZD2|A0A1S3CZD2_DIACI ATPase ASNA1 homolog OS=Diaphorina citri OX=121845 GN=LOC103508199 PE=3 SV=1	2	7	7	7	29.2	38.694	191740	233980	270010	347480	284020	333470	Quantified	GO:0045048(BP:protein insertion into ER membrane);GO:0005783(CC:endoplasmic reticulum);GO:0005524(MF:ATP binding);GO:0016887(MF:ATPase activity);GO:0046872(MF:metal ion binding)			Cytoplasm;Endoplasmic reticulum	PF02374(Anion-transporting ATPase)
A0A1S3CZD9	STI1 domain-containing protein	LOC103507510		tr|A0A1S3CZD9|A0A1S3CZD9_DIACI	tr|A0A1S3CZD9|A0A1S3CZD9_DIACI STI1 domain-containing protein OS=Diaphorina citri OX=121845 GN=LOC103507510 PE=3 SV=1	1	11	11	11	32.9	41.688	1457600	1068700	791700	563700	570740	573500	Quantified	GO:0046983(MF:protein dimerization activity)				PF13414(TPR repeat)
A0A1S3CZE0	Uncharacterized protein LOC103508166	LOC103508166		tr|A0A1S3CZE0|A0A1S3CZE0_DIACI	tr|A0A1S3CZE0|A0A1S3CZE0_DIACI Uncharacterized protein LOC103508166 OS=Diaphorina citri OX=121845 GN=LOC103508166 PE=4 SV=1	1	5	1	0	19	44.645	67457	23285		495300	54174	72445	Quantified
A0A1S3CZE1	Vigilin-like	LOC103508219		tr|A0A1S3CZE1|A0A1S3CZE1_DIACI	tr|A0A1S3CZE1|A0A1S3CZE1_DIACI Vigilin-like OS=Diaphorina citri OX=121845 GN=LOC103508219 PE=4 SV=1	1	5	5	5	15.8	40.022	517470	330440	139790	823250	367600	525870	Quantified	GO:0003723(MF:RNA binding)				PF00013(KH domain)
A0A1S3CZE7	Platelet-activating factor acetylhydrolase IB subunit beta isoform X1	LOC103508201		tr|A0A1S3CZE7|A0A1S3CZE7_DIACI	tr|A0A1S3CZE7|A0A1S3CZE7_DIACI Platelet-activating factor acetylhydrolase IB subunit beta isoform X1 OS=Diaphorina citri OX=121845 GN=LOC103508201 PE=4 SV=1	1	8	8	5	50.7	25.09	509600	519200	510490	697360	558470	512040	Quantified	GO:0016787(MF:hydrolase activity)				PF13472(GDSL-like Lipase/Acylhydrolase family)
A0A1S3CZF5	Phenoloxidase-activating factor 2-like	LOC103508186		tr|A0A1S3CZF5|A0A1S3CZF5_DIACI	tr|A0A1S3CZF5|A0A1S3CZF5_DIACI Phenoloxidase-activating factor 2-like OS=Diaphorina citri OX=121845 GN=LOC103508186 PE=4 SV=1	1	12	12	12	46.7	53.878	615490	1392500	1286000	673390	1080900	1238600	Quantified	GO:0004252(MF:serine-type endopeptidase activity)				PF00089(Trypsin)
A0A1S3CZG3	Proteasome subunit beta	LOC103508142		tr|A0A1S3CZG3|A0A1S3CZG3_DIACI	tr|A0A1S3CZG3|A0A1S3CZG3_DIACI Proteasome subunit beta OS=Diaphorina citri OX=121845 GN=LOC103508142 PE=3 SV=1	1	8	8	8	41.2	25.192	578850	588900	628920	529300	756650	767400	Quantified	GO:0051603(BP:proteolysis involved in cellular protein catabolic process);GO:0005737(CC:cytoplasm);GO:0005634(CC:nucleus);GO:0005839(CC:proteasome core complex);GO:0004298(MF:threonine-type endopeptidase activity)			Cytoplasm;Nucleus	PF00227(Proteasome subunit)
A0A1S3CZH1	ADP/ATP translocase	LOC103508270		tr|A0A1S3CZH1|A0A1S3CZH1_DIACI	tr|A0A1S3CZH1|A0A1S3CZH1_DIACI ADP/ATP translocase OS=Diaphorina citri OX=121845 GN=LOC103508270 PE=3 SV=1	1	14	11	11	55.4	34.297	648680	602880	963040	422220	693870	581630	Quantified	GO:0016021(CC:integral component of membrane);GO:0005743(CC:mitochondrial inner membrane);GO:0005347(MF:ATP transmembrane transporter activity)			Membrane;Multi-pass membrane protein	PF00153(Mitochondrial carrier protein)
A0A1S3CZH9	Cathepsin B-like cysteine proteinase 4	LOC103508275		tr|A0A1S3CZH9|A0A1S3CZH9_DIACI	tr|A0A1S3CZH9|A0A1S3CZH9_DIACI Cathepsin B-like cysteine proteinase 4 OS=Diaphorina citri OX=121845 GN=LOC103508275 PE=3 SV=1	1	9	9	9	36	38.838	1361100	1401000	1802700	1824700	2144000	1665500	Quantified	GO:0050790(BP:regulation of catalytic activity);GO:0004197(MF:cysteine-type endopeptidase activity)				PF00112(Papain family cysteine protease);PF08127(Peptidase family C1 propeptide)
A0A1S3CZK2	Cell division control protein 42 homolog	LOC103508197		tr|A0A1S3CZK2|A0A1S3CZK2_DIACI	tr|A0A1S3CZK2|A0A1S3CZK2_DIACI Cell division control protein 42 homolog OS=Diaphorina citri OX=121845 GN=LOC103508197 PE=3 SV=1	1	7	7	6	53.4	21.304	729030	667670	941510	556820	968720	1153800	Quantified	GO:0007264(BP:small GTPase mediated signal transduction);GO:0005525(MF:GTP binding);GO:0003924(MF:GTPase activity)			Cell membrane;Lipid-anchor	PF00071(Ras family)
A0A1S3CZK3	Mitochondrial import inner membrane translocase subunit TIM44	LOC103508306	FUNCTION: Essential component of the PAM complex, a complex required for the translocation of transit peptide-containing proteins from the inner membrane into the mitochondrial matrix in an ATP-dependent manner. {ECO:0000256|PIRNR:PIRNR037871}.	tr|A0A1S3CZK3|A0A1S3CZK3_DIACI	tr|A0A1S3CZK3|A0A1S3CZK3_DIACI Mitochondrial import inner membrane translocase subunit TIM44 OS=Diaphorina citri OX=121845 GN=LOC103508306 PE=3 SV=1	1	8	8	8	26.6	49.488	536910	500560	442880	977660	524380	582240	Quantified	GO:0030150(BP:protein import into mitochondrial matrix);GO:0005743(CC:mitochondrial inner membrane);GO:0051087(MF:chaperone binding)			Mitochondrion inner membrane	PF04280(Tim44-like domain)
A0A1S3CZK8	Protein ABHD11-like	LOC103508289		tr|A0A1S3CZK8|A0A1S3CZK8_DIACI;tr|A0A1S3D0Z3|A0A1S3D0Z3_DIACI;tr|A0A3Q0JL25|A0A3Q0JL25_DIACI	tr|A0A1S3CZK8|A0A1S3CZK8_DIACI Protein ABHD11-like OS=Diaphorina citri OX=121845 GN=LOC103508289 PE=4 SV=1	3	3	3	3	22.7	34.442	59468	95207	93772	97211	100140	79034	Quantified					PF12697(Alpha/beta hydrolase family)
A0A1S3CZL2	Tubulin beta chain	LOC103508326	FUNCTION: Tubulin is the major constituent of microtubules. It binds two moles of GTP, one at an exchangeable site on the beta chain and one at a non-exchangeable site on the alpha chain. {ECO:0000256|RuleBase:RU000352, ECO:0000256|SAAS:SAAS00031082}.	tr|A0A1S3CZL2|A0A1S3CZL2_DIACI	tr|A0A1S3CZL2|A0A1S3CZL2_DIACI Tubulin beta chain OS=Diaphorina citri OX=121845 GN=LOC103508326 PE=3 SV=1	1	12	9	8	34.9	51.278	530380	763750	1267600	364080	369150	456960	Quantified	GO:0007017(BP:microtubule-based process);GO:0005737(CC:cytoplasm);GO:0005874(CC:microtubule);GO:0005525(MF:GTP binding);GO:0003924(MF:GTPase activity);GO:0005200(MF:structural constituent of cytoskeleton)			Cytoplasm;cytoskeleton	PF03953(Tubulin C-terminal domain);PF00091(Tubulin/FtsZ family, GTPase domain)
A0A1S3CZL3	Proteasomal ubiquitin receptor ADRM1	LOC103507607		tr|A0A1S3CZL3|A0A1S3CZL3_DIACI	tr|A0A1S3CZL3|A0A1S3CZL3_DIACI Proteasomal ubiquitin receptor ADRM1 OS=Diaphorina citri OX=121845 GN=LOC103507607 PE=3 SV=1	1	4	4	4	23.2	29.702	201970	159010	158170	151900	154680	138330	Quantified	GO:0005737(CC:cytoplasm);GO:0005634(CC:nucleus)			Cytoplasm;Nucleus	PF16550(UCH-binding domain);PF04683(Proteasome complex subunit Rpn13 ubiquitin receptor)
A0A1S3CZL5	IMP dehydrogenase	LOC103508286		tr|A0A1S3CZL5|A0A1S3CZL5_DIACI	tr|A0A1S3CZL5|A0A1S3CZL5_DIACI IMP dehydrogenase OS=Diaphorina citri OX=121845 GN=LOC103508286 PE=4 SV=1	1	11	11	11	30.8	51.106	806830	790020	471830	1260900	646530	959880	Quantified	GO:0006164(BP:purine nucleotide biosynthetic process);GO:0003938(MF:IMP dehydrogenase activity)	K00088(NA)	ko00230(Purine metabolism);ko00983(Drug metabolism - other enzymes);ko01232(Nucleotide metabolism)		PF00478(IMP dehydrogenase / GMP reductase domain);PF00571(CBS domain)
A0A1S3CZL7	Pyridine nucleotide-disulfide oxidoreductase domain-containing protein 2-like	LOC103508352		tr|A0A1S3CZL7|A0A1S3CZL7_DIACI	tr|A0A1S3CZL7|A0A1S3CZL7_DIACI Pyridine nucleotide-disulfide oxidoreductase domain-containing protein 2-like OS=Diaphorina citri OX=121845 GN=LOC103508352 PE=4 SV=1	1	2	2	2	6.5	61.07	28511	42949	30119	66300	29330	40560	Quantified	GO:0016491(MF:oxidoreductase activity)				PF01593(Flavin containing amine oxidoreductase);PF13450(NAD(P)-binding Rossmann-like domain)
A0A3Q0JI11	Gamma-aminobutyric acid receptor-associated protein-like	LOC103521693		tr|A0A3Q0JI11|A0A3Q0JI11_DIACI;tr|A0A1S3CZM9|A0A1S3CZM9_DIACI;tr|A0A1S4EAC5|A0A1S4EAC5_DIACI;tr|A0A1S4EAR4|A0A1S4EAR4_DIACI	tr|A0A3Q0JI11|A0A3Q0JI11_DIACI Gamma-aminobutyric acid receptor-associated protein-like OS=Diaphorina citri OX=121845 GN=LOC103521693 PE=3 SV=1;tr|A0A1S3CZM9|A0A1S3CZM9_DIACI Gamma-aminobutyric acid receptor-associated protein isoform X3 OS=Diaphorina citr	4	1	1	1	15.6	12.461	95623	3820.8	58546	63403	55720	47907	Quantified	GO:0006914(BP:autophagy);GO:0005737(CC:cytoplasm)				PF02991(Autophagy protein Atg8 ubiquitin like)
A0A1S3CZP7	Uncharacterized protein LOC103508338	LOC103508338		tr|A0A1S3CZP7|A0A1S3CZP7_DIACI	tr|A0A1S3CZP7|A0A1S3CZP7_DIACI Uncharacterized protein LOC103508338 OS=Diaphorina citri OX=121845 GN=LOC103508338 PE=4 SV=1	1	1	1	1	4.1	42.183	58006	2915.5		99073	68988	67726	Quantified					PF00008(EGF-like domain)
A0A1S3CZQ3	UDP-glucose:glycoprotein glucosyltransferase 2-like	LOC103507670		tr|A0A1S3CZQ3|A0A1S3CZQ3_DIACI	tr|A0A1S3CZQ3|A0A1S3CZQ3_DIACI UDP-glucose:glycoprotein glucosyltransferase 2-like OS=Diaphorina citri OX=121845 GN=LOC103507670 PE=4 SV=1	1	3	2	2	19.4	30.285	94008	105810	121730	168870	120320	105040	Quantified	GO:0006486(BP:protein glycosylation);GO:0003980(MF:UDP-glucose:glycoprotein glucosyltransferase activity)				PF06427(UDP-glucose:Glycoprotein Glucosyltransferase)
A0A1S3CZS7	Uncharacterized protein LOC103508449	LOC103508449		tr|A0A1S3CZS7|A0A1S3CZS7_DIACI	tr|A0A1S3CZS7|A0A1S3CZS7_DIACI Uncharacterized protein LOC103508449 OS=Diaphorina citri OX=121845 GN=LOC103508449 PE=4 SV=1	1	2	2	2	23.1	14.693	1601200	2098600	887610	622220	2908700	4296700	Quantified
A0A1S3CZU1	Trafficking protein particle complex subunit 6B	LOC103508353		tr|A0A1S3CZU1|A0A1S3CZU1_DIACI	tr|A0A1S3CZU1|A0A1S3CZU1_DIACI Trafficking protein particle complex subunit 6B OS=Diaphorina citri OX=121845 GN=LOC103508353 PE=3 SV=1	1	2	2	2	27.3	18.936	73266	56593	19298	4917	45390	35020	Quantified	GO:0048193(BP:Golgi vesicle transport);GO:0043087(BP:regulation of GTPase activity)			Golgi apparatus;cis-Golgi network	PF04051(Transport protein particle (TRAPP) component)
A0A1S3CZU9	Proteasome subunit alpha type	LOC103508369	FUNCTION: The proteasome is a multicatalytic proteinase complex which is characterized by its ability to cleave peptides with Arg, Phe, Tyr, Leu, and Glu adjacent to the leaving group at neutral or slightly basic pH. {ECO:0000256|RuleBase:RU000551}.	tr|A0A1S3CZU9|A0A1S3CZU9_DIACI	tr|A0A1S3CZU9|A0A1S3CZU9_DIACI Proteasome subunit alpha type OS=Diaphorina citri OX=121845 GN=LOC103508369 PE=3 SV=2	1	9	9	9	58.1	27.231	936920	796070	706930	1016400	755340	788230	Quantified	GO:0006511(BP:ubiquitin-dependent protein catabolic process);GO:0005737(CC:cytoplasm);GO:0005634(CC:nucleus);GO:0019773(CC:proteasome core complex, alpha-subunit complex);GO:0004298(MF:threonine-type endopeptidase activity)			Cytoplasm;Nucleus	PF00227(Proteasome subunit);PF10584(Proteasome subunit A N-terminal signature)
A0A1S3CZV1	Methylosome subunit pICln	LOC103508485		tr|A0A1S3CZV1|A0A1S3CZV1_DIACI	tr|A0A1S3CZV1|A0A1S3CZV1_DIACI Methylosome subunit pICln OS=Diaphorina citri OX=121845 GN=LOC103508485 PE=3 SV=1	1	2	2	2	17.3	15.417	36741	58626	43022		35435	45255	Quantified	GO:0006884(BP:cell volume homeostasis);GO:0006821(BP:chloride transport);GO:0000387(BP:spliceosomal snRNP assembly);GO:0005623(CC:cell);GO:0005829(CC:cytosol);GO:0034709(CC:methylosome);GO:0034715(CC:pICln-Sm protein complex);GO:0005886(CC:plasma membrane)			Nucleus	PF03517(Regulator of volume decrease after cellular swelling)
A0A1S3CZV7	Glyoxylate reductase/hydroxypyruvate reductase-like isoform X3	LOC108251832		tr|A0A1S3CZV7|A0A1S3CZV7_DIACI;tr|A0A3Q0IRF5|A0A3Q0IRF5_DIACI;tr|A0A3Q0IW58|A0A3Q0IW58_DIACI;tr|A0A3Q0IWU8|A0A3Q0IWU8_DIACI	tr|A0A1S3CZV7|A0A1S3CZV7_DIACI Glyoxylate reductase/hydroxypyruvate reductase-like isoform X3 OS=Diaphorina citri OX=121845 GN=LOC108251832 PE=3 SV=1	4	3	3	3	13.2	35.565	72707	49246	120220	21179	5085.6	33166	Quantified	GO:0051287(MF:NAD binding);GO:0016616(MF:oxidoreductase activity, acting on the CH-OH group of donors, NAD or NADP as acceptor)				PF02826(D-isomer specific 2-hydroxyacid dehydrogenase, NAD binding domain);PF00389(D-isomer specific 2-hydroxyacid dehydrogenase, catalytic domain)
A0A1S3CZW7	Trifunctional enzyme subunit alpha, mitochondrial-like	LOC103508477		tr|A0A1S3CZW7|A0A1S3CZW7_DIACI;tr|A0A3Q0IW67|A0A3Q0IW67_DIACI	tr|A0A1S3CZW7|A0A1S3CZW7_DIACI Trifunctional enzyme subunit alpha, mitochondrial-like OS=Diaphorina citri OX=121845 GN=LOC103508477 PE=4 SV=1	2	15	15	13	73	29.237	4084800	3990000	4397900	6252500	5250400	4802800	Quantified	GO:0006631(BP:fatty acid metabolic process);GO:0003857(MF:3-hydroxyacyl-CoA dehydrogenase activity)				PF00725(3-hydroxyacyl-CoA dehydrogenase, C-terminal domain);PF02737(3-hydroxyacyl-CoA dehydrogenase, NAD binding domain)
A0A1S3CZX6	Large ribosomal subunit protein eL14	LOC103508494		tr|A0A1S3CZX6|A0A1S3CZX6_DIACI	tr|A0A1S3CZX6|A0A1S3CZX6_DIACI Large ribosomal subunit protein eL14 OS=Diaphorina citri OX=121845 GN=LOC103508494 PE=3 SV=1	1	3	3	3	17.8	25.796	880830	1031800	1151700	2472000	1080800	1303400	Quantified	GO:0006412(BP:translation);GO:0005840(CC:ribosome);GO:0003723(MF:RNA binding);GO:0003735(MF:structural constituent of ribosome)				PF01929(Ribosomal protein L14)
A0A1S3CZY1	Chitobiosyldiphosphodolichol beta-mannosyltransferase	LOC103508500		tr|A0A1S3CZY1|A0A1S3CZY1_DIACI	tr|A0A1S3CZY1|A0A1S3CZY1_DIACI Chitobiosyldiphosphodolichol beta-mannosyltransferase OS=Diaphorina citri OX=121845 GN=LOC103508500 PE=4 SV=1	1	2	2	2	8	40.084		15522	24873		30974	27809	Quantified	GO:0016021(CC:integral component of membrane);GO:0000030(MF:mannosyltransferase activity)
A0A1S3D007	Actin-related protein 2/3 complex subunit 5	LOC103508511	FUNCTION: Functions as component of the Arp2/3 complex which is involved in regulation of actin polymerization and together with an activating nucleation-promoting factor (NPF) mediates the formation of branched actin networks. Arp2/3 complex plays a critical role in the control of cell morphogenesis via the modulation of cell polarity development. {ECO:0000256|RuleBase:RU004301}.	tr|A0A1S3D007|A0A1S3D007_DIACI	tr|A0A1S3D007|A0A1S3D007_DIACI Actin-related protein 2/3 complex subunit 5 OS=Diaphorina citri OX=121845 GN=LOC103508511 PE=3 SV=1	1	3	3	3	41.4	16.876	140840	183010	177400	231790	203470	144910	Quantified	GO:0034314(BP:Arp2/3 complex-mediated actin nucleation);GO:0005885(CC:Arp2/3 protein complex)				PF04699(ARP2/3 complex 16 kDa subunit (p16-Arc))
A0A1S3D013	Actin-1	LOC103508596		tr|A0A1S3D013|A0A1S3D013_DIACI	tr|A0A1S3D013|A0A1S3D013_DIACI Actin-1 OS=Diaphorina citri OX=121845 GN=LOC103508596 PE=3 SV=1	1	14	4	4	57.6	27.868	16087000	13836000	16743000	28158000	16783000	18274000	Quantified	GO:0005737(CC:cytoplasm);GO:0005856(CC:cytoskeleton);GO:0005524(MF:ATP binding)				PF00022(Actin)
A0A1S3D016	Phosphatidylglycerophosphatase and protein-tyrosine phosphatase 1-like	LOC103508604		tr|A0A1S3D016|A0A1S3D016_DIACI	tr|A0A1S3D016|A0A1S3D016_DIACI Phosphatidylglycerophosphatase and protein-tyrosine phosphatase 1-like OS=Diaphorina citri OX=121845 GN=LOC103508604 PE=4 SV=1	1	3	3	3	21.5	22.125	21960	54900	35598	110690	84068	95085	Quantified	GO:0004725(MF:protein tyrosine phosphatase activity);GO:0008138(MF:protein tyrosine/serine/threonine phosphatase activity)				PF00782(Dual specificity phosphatase, catalytic domain)
A0A1S3D018	Uncharacterized protein LOC103507816	LOC103507816		tr|A0A1S3D018|A0A1S3D018_DIACI	tr|A0A1S3D018|A0A1S3D018_DIACI Uncharacterized protein LOC103507816 OS=Diaphorina citri OX=121845 GN=LOC103507816 PE=4 SV=1	1	1	1	1	17.3	11.736			122570				Identified
A0A1S3D024	Actin-related protein 2/3 complex subunit 4	LOC103508476	FUNCTION: Functions as actin-binding component of the Arp2/3 complex which is involved in regulation of actin polymerization and together with an activating nucleation-promoting factor (NPF) mediates the formation of branched actin networks. Seems to contact the mother actin filament. {ECO:0000256|PIRNR:PIRNR039100}.	tr|A0A1S3D024|A0A1S3D024_DIACI	tr|A0A1S3D024|A0A1S3D024_DIACI Actin-related protein 2/3 complex subunit 4 OS=Diaphorina citri OX=121845 GN=LOC103508476 PE=3 SV=1	1	4	4	4	22.6	19.808	142220	153800	182980	250660	171390	176640	Quantified	GO:0030041(BP:actin filament polymerization);GO:0034314(BP:Arp2/3 complex-mediated actin nucleation);GO:0005885(CC:Arp2/3 protein complex);GO:0005737(CC:cytoplasm);GO:0003779(MF:actin binding)			Cytoplasm;cytoskeleton	PF05856(ARP2/3 complex 20 kDa subunit (ARPC4))
A0A1S4EB39	Uncharacterized protein LOC103508653 isoform X3	LOC103508653		tr|A0A1S4EB39|A0A1S4EB39_DIACI;tr|A0A1S4EAS0|A0A1S4EAS0_DIACI;tr|A0A1S4EB46|A0A1S4EB46_DIACI;tr|A0A1S4EB47|A0A1S4EB47_DIACI;tr|A0A1S4EB34|A0A1S4EB34_DIACI;tr|A0A1S4EAX2|A0A1S4EAX2_DIACI;tr|A0A1S3D041|A0A1S3D041_DIACI	tr|A0A1S4EB39|A0A1S4EB39_DIACI Uncharacterized protein LOC103508653 isoform X3 OS=Diaphorina citri OX=121845 GN=LOC103508653 PE=4 SV=1;tr|A0A1S4EAS0|A0A1S4EAS0_DIACI Microtubule-associated protein Jupiter-like isoform X2 OS=Diaphorina citri OX=121845 GN=LO	7	2	2	2	39.2	10.422	433600	363750	343870	607590	301250	249160	Quantified
A0A1S3D046	folate gamma-glutamyl hydrolase	LOC103508601		tr|A0A1S3D046|A0A1S3D046_DIACI	tr|A0A1S3D046|A0A1S3D046_DIACI folate gamma-glutamyl hydrolase OS=Diaphorina citri OX=121845 GN=LOC103508601 PE=4 SV=1	1	4	4	4	24.8	23.545	229990	264630	336110	156440	321570	351440	Quantified	GO:0034722(MF:gamma-glutamyl-peptidase activity)				PF00117(Glutamine amidotransferase class-I)
A0A1S3D050	Protein C19orf12 homolog	LOC103507850		tr|A0A1S3D050|A0A1S3D050_DIACI	tr|A0A1S3D050|A0A1S3D050_DIACI Protein C19orf12 homolog OS=Diaphorina citri OX=121845 GN=LOC103507850 PE=3 SV=1	1	5	5	5	58	14.413	186850	142060	163700	501860	234980	246210	Quantified
A0A1S3D051	Uncharacterized protein LOC103508667	LOC103508667		tr|A0A1S3D051|A0A1S3D051_DIACI	tr|A0A1S3D051|A0A1S3D051_DIACI Uncharacterized protein LOC103508667 OS=Diaphorina citri OX=121845 GN=LOC103508667 PE=4 SV=1	1	1	1	1	14	15.192	559310	336300	346990	897250	1111700	534610	Quantified
A0A1S3D068	Uncharacterized protein LOC103508636 isoform X1	LOC103508636		tr|A0A1S3D068|A0A1S3D068_DIACI	tr|A0A1S3D068|A0A1S3D068_DIACI Uncharacterized protein LOC103508636 isoform X1 OS=Diaphorina citri OX=121845 GN=LOC103508636 PE=4 SV=1	1	1	1	1	21.5	10.452	666890	15008	32550		127860	597120	Quantified					PF00106(short chain dehydrogenase)
A0A1S3D082	Uncharacterized protein LOC103508678	LOC103508678		tr|A0A1S3D082|A0A1S3D082_DIACI	tr|A0A1S3D082|A0A1S3D082_DIACI Uncharacterized protein LOC103508678 OS=Diaphorina citri OX=121845 GN=LOC103508678 PE=4 SV=1	1	1	1	1	2.8	52.258	10383	15986	85236	2723.3		12907	Quantified
A0A1S3D097	MD-2-related lipid-recognition protein	LOC103507941		tr|A0A1S3D097|A0A1S3D097_DIACI	tr|A0A1S3D097|A0A1S3D097_DIACI MD-2-related lipid-recognition protein OS=Diaphorina citri OX=121845 GN=LOC103507941 PE=4 SV=1	1	2	2	2	35.9	10.479	135840	157970	118720	63384	132080	92727	Quantified					PF02221(ML domain)
A0A1S3D0A6	Pyridoxal-dependent decarboxylase domain-containing protein 2	LOC103508731		tr|A0A1S3D0A6|A0A1S3D0A6_DIACI	tr|A0A1S3D0A6|A0A1S3D0A6_DIACI Pyridoxal-dependent decarboxylase domain-containing protein 2 OS=Diaphorina citri OX=121845 GN=LOC103508731 PE=4 SV=1	1	6	6	6	12.2	78.129	143320	99416	141730	187240	119370	189880	Quantified	GO:0019752(BP:carboxylic acid metabolic process);GO:0016831(MF:carboxy-lyase activity);GO:0030170(MF:pyridoxal phosphate binding)				PF00282(Pyridoxal-dependent decarboxylase conserved domain)
A0A1S3D0B1	Uncharacterized protein LOC103508742	LOC103508742		tr|A0A1S3D0B1|A0A1S3D0B1_DIACI	tr|A0A1S3D0B1|A0A1S3D0B1_DIACI Uncharacterized protein LOC103508742 OS=Diaphorina citri OX=121845 GN=LOC103508742 PE=4 SV=1	1	3	3	3	33	11.958	1006000	725220	612620	484350	474220	325820	Quantified
A0A1S3D0B2	Methionine aminopeptidase	LOC103507971	FUNCTION: Cotranslationally removes the N-terminal methionine from nascent proteins. The N-terminal methionine is often cleaved when the second residue in the primary sequence is small and uncharged (Met-Ala-, Cys, Gly, Pro, Ser, Thr, or Val). {ECO:0000256|RuleBase:RU003653}.	tr|A0A1S3D0B2|A0A1S3D0B2_DIACI;tr|A0A3Q0IQC1|A0A3Q0IQC1_DIACI	tr|A0A1S3D0B2|A0A1S3D0B2_DIACI Methionine aminopeptidase OS=Diaphorina citri OX=121845 GN=LOC103507971 PE=3 SV=1	2	4	4	4	16.5	42.248	102130	98162	80942	204100	94141	132010	Quantified	GO:0070084(BP:protein initiator methionine removal);GO:0046872(MF:metal ion binding);GO:0070006(MF:metalloaminopeptidase activity)				PF00557(Metallopeptidase family M24);PF15801(zf-MYND-like zinc finger, mRNA-binding)
A0A1S3D1P6	Retinol dehydrogenase 12 isoform X3	LOC103508728		tr|A0A1S3D1P6|A0A1S3D1P6_DIACI;tr|A0A3Q0IS06|A0A3Q0IS06_DIACI;tr|A0A1S3D0B4|A0A1S3D0B4_DIACI;tr|A0A3Q0JHU1|A0A3Q0JHU1_DIACI	tr|A0A1S3D1P6|A0A1S3D1P6_DIACI Retinol dehydrogenase 12 isoform X3 OS=Diaphorina citri OX=121845 GN=LOC103508728 PE=3 SV=1;tr|A0A3Q0IS06|A0A3Q0IS06_DIACI Retinol dehydrogenase 12 isoform X2 OS=Diaphorina citri OX=121845 GN=LOC103508728 PE=3 SV=1;tr|A0A1S3D	4	3	3	3	16.6	34.606	91410	82643	116280	41404	127750	112920	Quantified					PF00106(short chain dehydrogenase)
A0A1S3D0C4	Eukaryotic translation initiation factor 4B	LOC103508743		tr|A0A1S3D0C4|A0A1S3D0C4_DIACI	tr|A0A1S3D0C4|A0A1S3D0C4_DIACI Eukaryotic translation initiation factor 4B OS=Diaphorina citri OX=121845 GN=LOC103508743 PE=4 SV=1	1	3	3	3	9.7	33.071	137570	126560	94794	183170	119510	158620	Quantified	GO:0097010(BP:eukaryotic translation initiation factor 4F complex assembly);GO:0033592(MF:RNA strand annealing activity);GO:0003743(MF:translation initiation factor activity)				PF00076(RNA recognition motif. (a.k.a. RRM, RBD, or RNP domain))
A0A1S3D0C5	Uncharacterized protein LOC103508661 isoform X2	LOC103508661		tr|A0A1S3D0C5|A0A1S3D0C5_DIACI	tr|A0A1S3D0C5|A0A1S3D0C5_DIACI Uncharacterized protein LOC103508661 isoform X2 OS=Diaphorina citri OX=121845 GN=LOC103508661 PE=4 SV=1	1	4	3	3	43.1	14.726	1837300	745850	869110	308630	886680	531460	Quantified
A0A1S3D0D0	Uncharacterized protein LOC103508781	LOC103508781		tr|A0A1S3D0D0|A0A1S3D0D0_DIACI	tr|A0A1S3D0D0|A0A1S3D0D0_DIACI Uncharacterized protein LOC103508781 OS=Diaphorina citri OX=121845 GN=LOC103508781 PE=4 SV=1	1	1	1	1	6.4	28.306	22491	18882	24616	45189	31197	35279	Quantified					PF00291(Pyridoxal-phosphate dependent enzyme)
A0A1S3D0D6	ATP synthase mitochondrial F1 complex assembly factor 2	LOC103508824		tr|A0A1S3D0D6|A0A1S3D0D6_DIACI	tr|A0A1S3D0D6|A0A1S3D0D6_DIACI ATP synthase mitochondrial F1 complex assembly factor 2 OS=Diaphorina citri OX=121845 GN=LOC103508824 PE=3 SV=1	1	3	3	3	14.3	32.912	26176	37710	22170	75631	42637	68636	Quantified	GO:0043461(BP:proton-transporting ATP synthase complex assembly)			Mitochondrion	PF07542(ATP12 chaperone protein)
A0A1S3D0E1	Small ribosomal subunit protein uS10m	LOC103508828		tr|A0A1S3D0E1|A0A1S3D0E1_DIACI	tr|A0A1S3D0E1|A0A1S3D0E1_DIACI Small ribosomal subunit protein uS10m OS=Diaphorina citri OX=121845 GN=LOC103508828 PE=3 SV=1	1	1	1	1	8.6	19.841	38608	36066	37733	19386	38162	37462	Quantified	GO:0005763(CC:mitochondrial small ribosomal subunit)			Mitochondrion	PF00338(Ribosomal protein S10p/S20e)
A0A1S3D0E2	Vesicle-fusing ATPase	LOC103508689	FUNCTION: Required for vesicle-mediated transport. Catalyzes the fusion of transport vesicles within the Golgi cisternae. Is also required for transport from the endoplasmic reticulum to the Golgi stack. Seems to function as a fusion protein required for the delivery of cargo proteins to all compartments of the Golgi stack independent of vesicle origin. {ECO:0000256|RuleBase:RU367045}.	tr|A0A1S3D0E2|A0A1S3D0E2_DIACI	tr|A0A1S3D0E2|A0A1S3D0E2_DIACI Vesicle-fusing ATPase OS=Diaphorina citri OX=121845 GN=LOC103508689 PE=3 SV=1	1	3	3	3	40.3	14.952	90430	51405	51475	56236	65375	51962	Quantified	GO:0035494(BP:SNARE complex disassembly);GO:0016887(MF:ATPase activity)			Cytoplasm
A0A1S3D0E5	Mitochondrial import inner membrane translocase subunit	LOC103508799	FUNCTION: Mitochondrial intermembrane chaperone that participates in the import and insertion of some multi-pass transmembrane proteins into the mitochondrial inner membrane. Also required for the transfer of beta-barrel precursors from the TOM complex to the sorting and assembly machinery (SAM complex) of the outer membrane. Acts as a chaperone-like protein that protects the hydrophobic precurso…	tr|A0A1S3D0E5|A0A1S3D0E5_DIACI	tr|A0A1S3D0E5|A0A1S3D0E5_DIACI Mitochondrial import inner membrane translocase subunit OS=Diaphorina citri OX=121845 GN=LOC103508799 PE=3 SV=1	1	2	2	2	28.9	10.096	725170	426650	500070	767600	520660	536190	Quantified	GO:0072321(BP:chaperone-mediated protein transport);GO:0005758(CC:mitochondrial intermembrane space);GO:0046872(MF:metal ion binding)			Mitochondrion inner membrane;Peripheral membrane protein;Intermembrane side	PF02953(Tim10/DDP family zinc finger)
A0A1S3D0E9	Mitochondrial import inner membrane translocase subunit TIM14-like isoform X1	LOC103508783		tr|A0A1S3D0E9|A0A1S3D0E9_DIACI;tr|A0A3Q0IS60|A0A3Q0IS60_DIACI	tr|A0A1S3D0E9|A0A1S3D0E9_DIACI Mitochondrial import inner membrane translocase subunit TIM14-like isoform X1 OS=Diaphorina citri OX=121845 GN=LOC103508783 PE=4 SV=1;tr|A0A3Q0IS60|A0A3Q0IS60_DIACI Mitochondrial import inner membrane translocase subunit TIM1	2	3	3	3	36.2	12.49	102790	107070	109690	55382	131090	75099	Quantified
A0A1S3D0G2	Mitochondrial import inner membrane translocase subunit	LOC103508727		tr|A0A1S3D0G2|A0A1S3D0G2_DIACI	tr|A0A1S3D0G2|A0A1S3D0G2_DIACI Mitochondrial import inner membrane translocase subunit OS=Diaphorina citri OX=121845 GN=LOC103508727 PE=3 SV=1	1	3	3	3	34	11.07	120090	157570	115680	182050	159340	170080	Quantified	GO:0045039(BP:protein import into mitochondrial inner membrane);GO:0042719(CC:mitochondrial intermembrane space protein transporter complex);GO:0042721(CC:TIM22 mitochondrial import inner membrane insertion complex);GO:0046872(MF:metal ion binding)			Mitochondrion inner membrane;Peripheral membrane protein;Intermembrane side	PF02953(Tim10/DDP family zinc finger)
A0A1S4EBH5	Eukaryotic translation initiation factor 4H-like isoform X6	LOC103508862		tr|A0A1S4EBH5|A0A1S4EBH5_DIACI;tr|A0A1S3D1X7|A0A1S3D1X7_DIACI;tr|A0A1S4EBE1|A0A1S4EBE1_DIACI;tr|A0A1S3D0J2|A0A1S3D0J2_DIACI;tr|A0A1S3D0H9|A0A1S3D0H9_DIACI;tr|A0A1S4EB57|A0A1S4EB57_DIACI	tr|A0A1S4EBH5|A0A1S4EBH5_DIACI Eukaryotic translation initiation factor 4H-like isoform X6 OS=Diaphorina citri OX=121845 GN=LOC103508862 PE=4 SV=1;tr|A0A1S3D1X7|A0A1S3D1X7_DIACI Eukaryotic translation initiation factor 4H-like isoform X5 OS=Diaphorina citr	6	3	3	3	16	33.447	389500	469350	257120	412590	382250	508250	Quantified	GO:0003743(MF:translation initiation factor activity)				PF00076(RNA recognition motif. (a.k.a. RRM, RBD, or RNP domain))
A0A1S3D0K0	arginine kinase	LOC103508767		tr|A0A1S3D0K0|A0A1S3D0K0_DIACI;tr|A0A3Q0IXB0|A0A3Q0IXB0_DIACI;tr|A0A3Q0IX81|A0A3Q0IX81_DIACI;tr|A0A3Q0J1H2|A0A3Q0J1H2_DIACI;tr|D7PPG4|D7PPG4_DIACI	tr|A0A1S3D0K0|A0A1S3D0K0_DIACI arginine kinase OS=Diaphorina citri OX=121845 GN=LOC103508767 PE=3 SV=1;tr|A0A3Q0IXB0|A0A3Q0IXB0_DIACI arginine kinase OS=Diaphorina citri OX=121845 GN=LOC103508767 PE=3 SV=1;tr|A0A3Q0IX81|A0A3Q0IX81_DIACI arginine kinase OS=	5	22	22	22	58.3	36.566	48477000	49957000	54534000	58123000	63872000	66723000	Quantified	GO:0046314(BP:phosphocreatine biosynthetic process);GO:0005524(MF:ATP binding);GO:0004111(MF:creatine kinase activity)				PF02807(ATP:guanido phosphotransferase, N-terminal domain);PF00217(ATP:guanido phosphotransferase, C-terminal catalytic domain)
A0A1S3D0K9	Uncharacterized protein LOC103508946 isoform X1	LOC103508946		tr|A0A1S3D0K9|A0A1S3D0K9_DIACI	tr|A0A1S3D0K9|A0A1S3D0K9_DIACI Uncharacterized protein LOC103508946 isoform X1 OS=Diaphorina citri OX=121845 GN=LOC103508946 PE=4 SV=1	1	2	1	1	34.3	15.673	291080	101680	216660	522950	275730	295510	Quantified
A0A1S3D0L5	Uncharacterized protein LOC103508106	LOC103508106		tr|A0A1S3D0L5|A0A1S3D0L5_DIACI	tr|A0A1S3D0L5|A0A1S3D0L5_DIACI Uncharacterized protein LOC103508106 OS=Diaphorina citri OX=121845 GN=LOC103508106 PE=4 SV=1	1	1	1	1	8.8	19.043	55699	45284	38370	86260	38409	69771	Quantified
A0A1S3D0N6	2-oxoglutarate dehydrogenase, mitochondrial-like	LOC103508861		tr|A0A1S3D0N6|A0A1S3D0N6_DIACI	tr|A0A1S3D0N6|A0A1S3D0N6_DIACI 2-oxoglutarate dehydrogenase, mitochondrial-like OS=Diaphorina citri OX=121845 GN=LOC103508861 PE=3 SV=1	1	2	2	2	7.7	46.023	9009	10141	37454		8881.9	15249	Quantified	GO:0006099(BP:tricarboxylic acid cycle);GO:0004591(MF:oxoglutarate dehydrogenase (succinyl-transferring) activity);GO:0030976(MF:thiamine pyrophosphate binding)				PF16078(2-oxoglutarate dehydrogenase N-terminus)
A0A1S3D0P0	Lysosomal alpha-glucosidase-like	LOC103508865		tr|A0A1S3D0P0|A0A1S3D0P0_DIACI	tr|A0A1S3D0P0|A0A1S3D0P0_DIACI Lysosomal alpha-glucosidase-like OS=Diaphorina citri OX=121845 GN=LOC103508865 PE=4 SV=1	1	3	3	3	37.8	12.614	279430	138260	85536	499930	137670	177890	Quantified
A0A3Q0IXG6	Calpain-B isoform X5	LOC103508959		tr|A0A3Q0IXG6|A0A3Q0IXG6_DIACI;tr|A0A1S3D0P2|A0A1S3D0P2_DIACI;tr|A0A1S3D0R0|A0A1S3D0R0_DIACI	tr|A0A3Q0IXG6|A0A3Q0IXG6_DIACI Calpain-B isoform X5 OS=Diaphorina citri OX=121845 GN=LOC103508959 PE=3 SV=1;tr|A0A1S3D0P2|A0A1S3D0P2_DIACI Calpain-A isoform X1 OS=Diaphorina citri OX=121845 GN=LOC103508959 PE=3 SV=1;tr|A0A1S3D0R0|A0A1S3D0R0_DIACI Calpain-A	3	24	24	24	41.5	86.586	1052100	1479800	1587100	1960200	1815400	1833800	Quantified	GO:0005509(MF:calcium ion binding);GO:0004198(MF:calcium-dependent cysteine-type endopeptidase activity)				PF00648(Calpain family cysteine protease);PF01067(Calpain large subunit, domain III);PF13833(EF-hand domain pair);PF13405(EF-hand domain)
A0A1S3D0P3	Endocuticle structural glycoprotein SgAbd-2-like	LOC103508942		tr|A0A1S3D0P3|A0A1S3D0P3_DIACI	tr|A0A1S3D0P3|A0A1S3D0P3_DIACI Endocuticle structural glycoprotein SgAbd-2-like OS=Diaphorina citri OX=121845 GN=LOC103508942 PE=4 SV=1	1	3	3	3	42.9	15.115	8454800	6234300	5671800	9264600	6407400	6421400	Quantified	GO:0042302(MF:structural constituent of cuticle)				PF00379(Insect cuticle protein)
A0A1S3D0Q7	Elongin-B	LOC103509001		tr|A0A1S3D0Q7|A0A1S3D0Q7_DIACI	tr|A0A1S3D0Q7|A0A1S3D0Q7_DIACI Elongin-B OS=Diaphorina citri OX=121845 GN=LOC103509001 PE=4 SV=1	1	3	3	3	29.5	14.562	563950	381330	350430	352420	345130	317810	Quantified	GO:0006368(BP:transcription elongation from RNA polymerase II promoter);GO:0070449(CC:elongin complex);GO:0030891(CC:VCB complex)
A0A1S3D0S6	Elongator complex protein 3	LOC103509039	FUNCTION: Catalytic tRNA acetyltransferase subunit of the RNA polymerase II elongator complex, which is a component of the RNA polymerase II (Pol II) holoenzyme and is involved in transcriptional elongation. {ECO:0000256|PIRNR:PIRNR005669}.	tr|A0A1S3D0S6|A0A1S3D0S6_DIACI	tr|A0A1S3D0S6|A0A1S3D0S6_DIACI Elongator complex protein 3 OS=Diaphorina citri OX=121845 GN=LOC103509039 PE=3 SV=1	1	3	3	3	8.8	63.337	1845300	1434600	1202400	1797300	1900600	1943400	Quantified	GO:0051536(MF:iron-sulfur cluster binding);GO:0046872(MF:metal ion binding);GO:0008080(MF:N-acetyltransferase activity)				PF16199(Radical_SAM C-terminal domain);PF04055(Radical SAM superfamily);PF00583(Acetyltransferase (GNAT) family)
A0A1S3D0T3	Alpha-tocopherol transfer protein-like	LOC103508939		tr|A0A1S3D0T3|A0A1S3D0T3_DIACI	tr|A0A1S3D0T3|A0A1S3D0T3_DIACI Alpha-tocopherol transfer protein-like OS=Diaphorina citri OX=121845 GN=LOC103508939 PE=4 SV=1	1	1	1	1	5.2	32.747	4201.4		42552	26578	12366		Quantified					PF00650(CRAL/TRIO domain)
A0A1S3D0U3	Uncharacterized protein LOC103508960	LOC103508960		tr|A0A1S3D0U3|A0A1S3D0U3_DIACI	tr|A0A1S3D0U3|A0A1S3D0U3_DIACI Uncharacterized protein LOC103508960 OS=Diaphorina citri OX=121845 GN=LOC103508960 PE=4 SV=1	1	2	2	2	5.4	63.526	50518	74782	51221	16593	24993	33053	Quantified	GO:0016021(CC:integral component of membrane)
A0A1S3D0V4	Ribonuclease kappa-like	LOC103509056		tr|A0A1S3D0V4|A0A1S3D0V4_DIACI	tr|A0A1S3D0V4|A0A1S3D0V4_DIACI Ribonuclease kappa-like OS=Diaphorina citri OX=121845 GN=LOC103509056 PE=3 SV=1	1	1	1	1	27.9	7.2834					38843	43474	Quantified	GO:0004521(MF:endoribonuclease activity)			Membrane;Multi-pass membrane protein
A0A1S3D0V5	U2 small nuclear ribonucleoprotein A	LOC103509096		tr|A0A1S3D0V5|A0A1S3D0V5_DIACI	tr|A0A1S3D0V5|A0A1S3D0V5_DIACI U2 small nuclear ribonucleoprotein A OS=Diaphorina citri OX=121845 GN=LOC103509096 PE=3 SV=1	1	1	1	1	6.2	31.104	4932.7	15965	10410	24344	3066.4	11447	Quantified					PF14580(Leucine-rich repeat)
A0A1S3D0W6	Ras-related protein Rab-39B-like	LOC103509152		tr|A0A1S3D0W6|A0A1S3D0W6_DIACI	tr|A0A1S3D0W6|A0A1S3D0W6_DIACI Ras-related protein Rab-39B-like OS=Diaphorina citri OX=121845 GN=LOC103509152 PE=4 SV=1	1	5	5	4	36.5	21.56	626200	837000	1316800	702460	1129400	1009800	Quantified	GO:0005525(MF:GTP binding);GO:0003924(MF:GTPase activity)				PF00071(Ras family)
A0A1S3D0X5	LOW QUALITY PROTEIN: clavesin-1-like	LOC103509126		tr|A0A1S3D0X5|A0A1S3D0X5_DIACI	tr|A0A1S3D0X5|A0A1S3D0X5_DIACI LOW QUALITY PROTEIN: clavesin-1-like OS=Diaphorina citri OX=121845 GN=LOC103509126 PE=4 SV=1	1	2	2	2	7.6	33.793	1732.2	4085.4	1692.4	104690	2103.9	11031	Quantified					PF00650(CRAL/TRIO domain)
A0A1S3D0X6	Uncharacterized protein LOC103509172	LOC103509172		tr|A0A1S3D0X6|A0A1S3D0X6_DIACI	tr|A0A1S3D0X6|A0A1S3D0X6_DIACI Uncharacterized protein LOC103509172 OS=Diaphorina citri OX=121845 GN=LOC103509172 PE=4 SV=1	1	4	4	4	27.6	17.553	421090	192480	437840	712030	465600	394900	Quantified	GO:0016021(CC:integral component of membrane)
A0A1S3D0X8	Uncharacterized protein LOC103509106	LOC103509106		tr|A0A1S3D0X8|A0A1S3D0X8_DIACI	tr|A0A1S3D0X8|A0A1S3D0X8_DIACI Uncharacterized protein LOC103509106 OS=Diaphorina citri OX=121845 GN=LOC103509106 PE=4 SV=1	1	5	5	5	28.5	29.472	554410	624230	632990	479520	642200	697410	Quantified
A0A1S4EBP6	Mucin-22 isoform X3	LOC103509177		tr|A0A1S4EBP6|A0A1S4EBP6_DIACI;tr|A0A1S3D0Y1|A0A1S3D0Y1_DIACI	tr|A0A1S4EBP6|A0A1S4EBP6_DIACI Mucin-22 isoform X3 OS=Diaphorina citri OX=121845 GN=LOC103509177 PE=4 SV=1;tr|A0A1S3D0Y1|A0A1S3D0Y1_DIACI Uncharacterized protein DDB_G0271670 isoform X1 OS=Diaphorina citri OX=121845 GN=LOC103509177 PE=4 SV=1	2	1	1	1	4.2	56.277	6215.9	42501					Quantified	GO:0016021(CC:integral component of membrane);GO:0008234(MF:cysteine-type peptidase activity)				PF00112(Papain family cysteine protease)
A0A1S3D0Y4	Uncharacterized protein LOC103509115	LOC103509115		tr|A0A1S3D0Y4|A0A1S3D0Y4_DIACI	tr|A0A1S3D0Y4|A0A1S3D0Y4_DIACI Uncharacterized protein LOC103509115 OS=Diaphorina citri OX=121845 GN=LOC103509115 PE=4 SV=1	1	2	2	2	14.9	14.612	179620	156130	143830		58804	103670	Quantified
A0A1S3D0Y6	Lipid storage droplets surface-binding protein 2	LOC103509186		tr|A0A1S3D0Y6|A0A1S3D0Y6_DIACI	tr|A0A1S3D0Y6|A0A1S3D0Y6_DIACI Lipid storage droplets surface-binding protein 2 OS=Diaphorina citri OX=121845 GN=LOC103509186 PE=3 SV=1	1	3	3	3	43.8	15.873	46983	229400	232170		39594	46996	Quantified					PF03036(Perilipin family)
A0A1S3D0Z6	Vacuolar protein sorting-associated protein VTA1 homolog isoform X1	LOC103509201		tr|A0A1S3D0Z6|A0A1S3D0Z6_DIACI;tr|A0A1S3DP90|A0A1S3DP90_DIACI;tr|A0A1S3D173|A0A1S3D173_DIACI	tr|A0A1S3D0Z6|A0A1S3D0Z6_DIACI Vacuolar protein sorting-associated protein VTA1 homolog isoform X1 OS=Diaphorina citri OX=121845 GN=LOC103509201 PE=3 SV=1;tr|A0A1S3DP90|A0A1S3DP90_DIACI Vacuolar protein sorting-associated protein VTA1 homolog OS=Diaphorina	3	4	4	4	23.1	34.635	124900	143550	245040	117700	56386	163250	Quantified				Cytoplasm;Endosome membrane;Peripheral membrane protein;Membrane	PF04652(Vta1 like)
A0A1S4EAH3	15-hydroxyprostaglandin dehydrogenase [NAD(+)] isoform X6	LOC103508305		tr|A0A1S4EAH3|A0A1S4EAH3_DIACI;tr|A0A1S3D104|A0A1S3D104_DIACI;tr|A0A1S4EAP3|A0A1S4EAP3_DIACI;tr|A0A3Q0IR48|A0A3Q0IR48_DIACI	tr|A0A1S4EAH3|A0A1S4EAH3_DIACI 15-hydroxyprostaglandin dehydrogenase [NAD(+)] isoform X6 OS=Diaphorina citri OX=121845 GN=LOC103508305 PE=3 SV=1;tr|A0A1S3D104|A0A1S3D104_DIACI 15-hydroxyprostaglandin dehydrogenase [NAD(+)] isoform X4 OS=Diaphorina citri OX	4	10	10	10	49.8	31.456	1357700	1053100	843280	1026300	881280	1082900	Quantified		K00059(NA)	ko00061(Fatty acid biosynthesis);ko00333(Prodigiosin biosynthesis);ko00780(Biotin metabolism);ko01240(Biosynthesis of cofactors)		PF00106(short chain dehydrogenase)
A0A1S3D116	Flightin	LOC103508322		tr|A0A1S3D116|A0A1S3D116_DIACI	tr|A0A1S3D116|A0A1S3D116_DIACI Flightin OS=Diaphorina citri OX=121845 GN=LOC103508322 PE=4 SV=1	1	4	3	3	42.3	15.772	6308400	7881600	3595400	12435000	8670300	8153600	Quantified
A0A1S3D144	Uncharacterized protein LOC103509279	LOC103509279		tr|A0A1S3D144|A0A1S3D144_DIACI	tr|A0A1S3D144|A0A1S3D144_DIACI Uncharacterized protein LOC103509279 OS=Diaphorina citri OX=121845 GN=LOC103509279 PE=3 SV=1	1	2	2	2	19.6	16.795	5197.5	16042	15856	159800	34265	104410	Quantified	GO:0016255(BP:attachment of GPI anchor to protein);GO:0042765(CC:GPI-anchor transamidase complex)			Endoplasmic reticulum membrane;Multi-pass membrane protein;Membrane	PF10510(Phosphatidylinositol-glycan biosynthesis class S protein)
A0A1S3D166	Sodium/potassium-transporting ATPase subunit alpha	LOC103508421		tr|A0A1S3D166|A0A1S3D166_DIACI;tr|A0A3Q0JFJ8|A0A3Q0JFJ8_DIACI	tr|A0A1S3D166|A0A1S3D166_DIACI Sodium/potassium-transporting ATPase subunit alpha OS=Diaphorina citri OX=121845 GN=LOC103508421 PE=3 SV=1	2	22	22	21	31.4	111.89	1228900	1213700	1552300	2125600	1473800	1656800	Quantified	GO:0016021(CC:integral component of membrane);GO:0005524(MF:ATP binding);GO:0046872(MF:metal ion binding);GO:0008556(MF:potassium-transporting ATPase activity)			Cell membrane;Multi-pass membrane protein	PF13246(Cation transport ATPase (P-type));PF00689(Cation transporting ATPase, C-terminus);PF00122(E1-E2 ATPase);PF00690(Cation transporter/ATPase, N-terminus)
A0A1S3D172	Transmembrane emp24 domain-containing protein eca	LOC103509321		tr|A0A1S3D172|A0A1S3D172_DIACI	tr|A0A1S3D172|A0A1S3D172_DIACI Transmembrane emp24 domain-containing protein eca OS=Diaphorina citri OX=121845 GN=LOC103509321 PE=3 SV=1	1	4	4	1	20.1	24.99	75819	277940	411730	164540	178640	158960	Quantified	GO:0005789(CC:endoplasmic reticulum membrane);GO:0016021(CC:integral component of membrane)			Membrane;Single-pass type I membrane protein	PF01105(emp24/gp25L/p24 family/GOLD)
A0A1S3D183	Proteasome subunit alpha type-7-1	LOC103509367		tr|A0A1S3D183|A0A1S3D183_DIACI	tr|A0A1S3D183|A0A1S3D183_DIACI Proteasome subunit alpha type-7-1 OS=Diaphorina citri OX=121845 GN=LOC103509367 PE=3 SV=1	1	3	3	3	26.6	20.244	484440	472540	518890	691470	653970	629960	Quantified	GO:0051603(BP:proteolysis involved in cellular protein catabolic process);GO:0005737(CC:cytoplasm);GO:0019773(CC:proteasome core complex, alpha-subunit complex);GO:0004298(MF:threonine-type endopeptidase activity)			Nucleus	PF00227(Proteasome subunit)
A0A1S3D184	Mitochondrial intermembrane space import and assembly protein 40-B-like	LOC103509337		tr|A0A1S3D184|A0A1S3D184_DIACI;tr|A0A1S3DL69|A0A1S3DL69_DIACI;tr|A0A3Q0ITC5|A0A3Q0ITC5_DIACI	tr|A0A1S3D184|A0A1S3D184_DIACI Mitochondrial intermembrane space import and assembly protein 40-B-like OS=Diaphorina citri OX=121845 GN=LOC103509337 PE=4 SV=1;tr|A0A1S3DL69|A0A1S3DL69_DIACI Mitochondrial intermembrane space import and assembly protein 40 O	3	2	2	2	16	16.026	86270	116310	99661		118950	117040	Quantified	GO:0045041(BP:protein import into mitochondrial intermembrane space);GO:0015035(MF:protein disulfide oxidoreductase activity)				PF06747(CHCH domain)
A0A1S3D185	LOW QUALITY PROTEIN: uncharacterized protein LOC103509301	LOC103509301		tr|A0A1S3D185|A0A1S3D185_DIACI	tr|A0A1S3D185|A0A1S3D185_DIACI LOW QUALITY PROTEIN: uncharacterized protein LOC103509301 OS=Diaphorina citri OX=121845 GN=LOC103509301 PE=3 SV=2	1	9	9	9	11.2	185.24	491390	542710	455460	2786200	2152100	2079000	Quantified	GO:0016021(CC:integral component of membrane);GO:0016758(MF:transferase activity, transferring hexosyl groups)				PF00201(UDP-glucoronosyl and UDP-glucosyl transferase)
A0A1S3D192	Ras-related protein Rab-21	LOC103509259		tr|A0A1S3D192|A0A1S3D192_DIACI	tr|A0A1S3D192|A0A1S3D192_DIACI Ras-related protein Rab-21 OS=Diaphorina citri OX=121845 GN=LOC103509259 PE=3 SV=1	1	2	2	2	13.5	25.089	48968		37586	146820	46870	15429	Quantified	GO:0032482(BP:Rab protein signal transduction);GO:0016020(CC:membrane);GO:0005525(MF:GTP binding);GO:0003924(MF:GTPase activity)				PF00071(Ras family)
A0A1S3D197	Histone-lysine N-methyltransferase NSD3	LOC103509368		tr|A0A1S3D197|A0A1S3D197_DIACI	tr|A0A1S3D197|A0A1S3D197_DIACI Histone-lysine N-methyltransferase NSD3 OS=Diaphorina citri OX=121845 GN=LOC103509368 PE=4 SV=1	1	5	5	5	25.1	31.103	272620	191240	245420	266070	180140	152270	Quantified	GO:0032259(BP:methylation);GO:0008168(MF:methyltransferase activity)				PF00855(PWWP domain)
A0A1S3D1A8	Cofilin/actin-depolymerizing factor homolog isoform X1	LOC103509384		tr|A0A1S3D1A8|A0A1S3D1A8_DIACI	tr|A0A1S3D1A8|A0A1S3D1A8_DIACI Cofilin/actin-depolymerizing factor homolog isoform X1 OS=Diaphorina citri OX=121845 GN=LOC103509384 PE=3 SV=2	1	6	6	6	48.4	14.97	8851100	8848100	8086800	3979300	7751600	7368600	Quantified	GO:0030042(BP:actin filament depolymerization);GO:0015629(CC:actin cytoskeleton);GO:0003779(MF:actin binding)				PF00241(Cofilin/tropomyosin-type actin-binding protein)
A0A1S3D1A9	U6 snRNA-associated Sm-like protein LSm1	LOC103509335	FUNCTION: Probably involved with other LSm subunits in the general process of degradation of mRNAs. {ECO:0000256|RuleBase:RU365047}.	tr|A0A1S3D1A9|A0A1S3D1A9_DIACI	tr|A0A1S3D1A9|A0A1S3D1A9_DIACI U6 snRNA-associated Sm-like protein LSm1 OS=Diaphorina citri OX=121845 GN=LOC103509335 PE=3 SV=1	1	2	2	2	22.8	15.865	19621	45740	23024	51887	40203	77120	Quantified	GO:0006397(BP:mRNA processing);GO:0000956(BP:nuclear-transcribed mRNA catabolic process);GO:0000932(CC:P-body);GO:0000339(MF:RNA cap binding)			Cytoplasm;P-body	PF01423(LSM domain)
A0A1S3D1B0	Craniofacial development protein 2-like	LOC103508479		tr|A0A1S3D1B0|A0A1S3D1B0_DIACI	tr|A0A1S3D1B0|A0A1S3D1B0_DIACI Craniofacial development protein 2-like OS=Diaphorina citri OX=121845 GN=LOC103508479 PE=4 SV=1	1	1	1	1	11.6	22.699	103650	168520	138660		91061	71880	Quantified					PF03372(Endonuclease/Exonuclease/phosphatase family)
A0A1S3D1B5	Trifunctional enzyme subunit alpha, mitochondrial	LOC103508490		tr|A0A1S3D1B5|A0A1S3D1B5_DIACI;tr|A0A3Q0IRI8|A0A3Q0IRI8_DIACI	tr|A0A1S3D1B5|A0A1S3D1B5_DIACI Trifunctional enzyme subunit alpha, mitochondrial OS=Diaphorina citri OX=121845 GN=LOC103508490 PE=4 SV=1	2	14	14	8	36.3	64.092	4439200	5336000	5842200	6177400	7512100	6418400	Quantified	GO:0006631(BP:fatty acid metabolic process);GO:0003857(MF:3-hydroxyacyl-CoA dehydrogenase activity)				PF02737(3-hydroxyacyl-CoA dehydrogenase, NAD binding domain);PF00378(Enoyl-CoA hydratase/isomerase)
A0A1S3D1B8	Uncharacterized protein LOC103509396 isoform X1	LOC103509396		tr|A0A1S3D1B8|A0A1S3D1B8_DIACI	tr|A0A1S3D1B8|A0A1S3D1B8_DIACI Uncharacterized protein LOC103509396 isoform X1 OS=Diaphorina citri OX=121845 GN=LOC103509396 PE=4 SV=1	1	4	4	4	11.4	72.797	5370.7		9383.1	21486	18947	27700	Quantified
A0A1S3D1C2	Probable protein disulfide-isomerase ER-60	LOC103509302		tr|A0A1S3D1C2|A0A1S3D1C2_DIACI	tr|A0A1S3D1C2|A0A1S3D1C2_DIACI Probable protein disulfide-isomerase ER-60 OS=Diaphorina citri OX=121845 GN=LOC103509302 PE=4 SV=1	1	3	3	3	36.2	7.7627	985400	835990	746730	1228700	846930	896600	Quantified	GO:0016853(MF:isomerase activity)				PF00085(Thioredoxin)
A0A1S3D1D3	GPI mannosyltransferase 1	LOC103509385	FUNCTION: Mannosyltransferase involved in glycosylphosphatidylinositol-anchor biosynthesis. Transfers the first alpha-1,4-mannose to GlcN-acyl-PI during GPI precursor assembly. {ECO:0000256|RuleBase:RU365064}.	tr|A0A1S3D1D3|A0A1S3D1D3_DIACI	tr|A0A1S3D1D3|A0A1S3D1D3_DIACI GPI mannosyltransferase 1 OS=Diaphorina citri OX=121845 GN=LOC103509385 PE=3 SV=2	1	5	5	5	17.6	47.728	134630	23913	81588	117470	103550	123630	Quantified	GO:0006506(BP:GPI anchor biosynthetic process);GO:0005789(CC:endoplasmic reticulum membrane);GO:0016021(CC:integral component of membrane);GO:0016758(MF:transferase activity, transferring hexosyl groups)			Endoplasmic reticulum membrane;Multi-pass membrane protein;Membrane	PF05007(Mannosyltransferase (PIG-M))
A0A1S3D1D4	28S ribosomal protein S34, mitochondrial	LOC103509417		tr|A0A1S3D1D4|A0A1S3D1D4_DIACI	tr|A0A1S3D1D4|A0A1S3D1D4_DIACI 28S ribosomal protein S34, mitochondrial OS=Diaphorina citri OX=121845 GN=LOC103509417 PE=4 SV=1	1	2	2	2	21.4	24.858		40514	37594	38905	47181	55440	Quantified	GO:0005739(CC:mitochondrion);GO:0005840(CC:ribosome);GO:0003735(MF:structural constituent of ribosome)				PF16053(Mitochondrial 28S ribosomal protein S34)
A0A1S3D1F5	Programmed cell death protein 6 isoform X2	LOC103509446		tr|A0A1S3D1F5|A0A1S3D1F5_DIACI;tr|A0A3Q0IY30|A0A3Q0IY30_DIACI	tr|A0A1S3D1F5|A0A1S3D1F5_DIACI Programmed cell death protein 6 isoform X2 OS=Diaphorina citri OX=121845 GN=LOC103509446 PE=4 SV=1;tr|A0A3Q0IY30|A0A3Q0IY30_DIACI Programmed cell death protein 6 isoform X1 OS=Diaphorina citri OX=121845 GN=LOC103509446 PE=4 S	2	6	6	5	45.8	20.58	207900	253920	305570	270230	235380	185520	Quantified	GO:0005509(MF:calcium ion binding)				PF13202(EF hand);PF13499(EF-hand domain pair)
A0A1S3D1G9	Protein canopy homolog 3	LOC103509466		tr|A0A1S3D1G9|A0A1S3D1G9_DIACI	tr|A0A1S3D1G9|A0A1S3D1G9_DIACI Protein canopy homolog 3 OS=Diaphorina citri OX=121845 GN=LOC103509466 PE=4 SV=1	1	3	3	3	23.9	24.073	60561	130670	65839	22795	46742	58965	Quantified	GO:0016021(CC:integral component of membrane)				PF11938(TLR4 regulator and MIR-interacting MSAP)
A0A1S3D1I0	26S proteasome regulatory subunit 8	LOC103508602		tr|A0A1S3D1I0|A0A1S3D1I0_DIACI;tr|A0A1S3DSR8|A0A1S3DSR8_DIACI;tr|A0A3Q0IRQ7|A0A3Q0IRQ7_DIACI	tr|A0A1S3D1I0|A0A1S3D1I0_DIACI 26S proteasome regulatory subunit 8 OS=Diaphorina citri OX=121845 GN=LOC103508602 PE=3 SV=1;tr|A0A1S3DSR8|A0A1S3DSR8_DIACI 26S proteasome regulatory subunit 8-like OS=Diaphorina citri OX=121845 GN=LOC103524060 PE=3 SV=2	3	13	13	12	45.2	45.531	1350300	1024400	877300	1559400	945090	1107000	Quantified	GO:0030163(BP:protein catabolic process);GO:0005737(CC:cytoplasm);GO:0000502(CC:proteasome complex);GO:0005524(MF:ATP binding);GO:0016787(MF:hydrolase activity)				PF00004(ATPase family associated with various cellular activities (AAA))
A0A1S3D1J0	Mitochondrial proton/calcium exchanger protein-like	LOC103508619		tr|A0A1S3D1J0|A0A1S3D1J0_DIACI	tr|A0A1S3D1J0|A0A1S3D1J0_DIACI Mitochondrial proton/calcium exchanger protein-like OS=Diaphorina citri OX=121845 GN=LOC103508619 PE=4 SV=2	1	1	1	1	17.3	12.632	67231	38854		163250	58418	68226	Quantified
A0A1S3D1J4	Protein enhancer of sevenless 2B	LOC103509503		tr|A0A1S3D1J4|A0A1S3D1J4_DIACI;tr|A0A1S3D1F1|A0A1S3D1F1_DIACI	tr|A0A1S3D1J4|A0A1S3D1J4_DIACI Protein enhancer of sevenless 2B OS=Diaphorina citri OX=121845 GN=LOC103509503 PE=4 SV=1;tr|A0A1S3D1F1|A0A1S3D1F1_DIACI Protein enhancer of sevenless 2B-like OS=Diaphorina citri OX=121845 GN=LOC103509346 PE=4 SV=1	2	6	6	6	29.8	28.088	797100	624320	604330	957080	619150	604460	Quantified					PF00017(SH2 domain);PF00018(SH3 domain);PF14604(Variant SH3 domain)
A0A1S3D1K0	Uncharacterized protein LOC103508637	LOC103508637		tr|A0A1S3D1K0|A0A1S3D1K0_DIACI	tr|A0A1S3D1K0|A0A1S3D1K0_DIACI Uncharacterized protein LOC103508637 OS=Diaphorina citri OX=121845 GN=LOC103508637 PE=4 SV=1	1	13	13	13	38.1	71.517	1500400	1569200	1649300	1405800	1765700	1444200	Quantified	GO:0016491(MF:oxidoreductase activity)	K00059(NA)	ko00061(Fatty acid biosynthesis);ko00333(Prodigiosin biosynthesis);ko00780(Biotin metabolism);ko01240(Biosynthesis of cofactors)		PF00106(short chain dehydrogenase)
A0A1S3D1L9	Inositol-3-phosphate synthase-like	LOC103509558		tr|A0A1S3D1L9|A0A1S3D1L9_DIACI	tr|A0A1S3D1L9|A0A1S3D1L9_DIACI Inositol-3-phosphate synthase-like OS=Diaphorina citri OX=121845 GN=LOC103509558 PE=4 SV=1	1	4	3	3	62	11.252	111570	57232	183480	181180	106760	127910	Quantified	GO:0006021(BP:inositol biosynthetic process);GO:0008654(BP:phospholipid biosynthetic process);GO:0004512(MF:inositol-3-phosphate synthase activity)				PF07994(Myo-inositol-1-phosphate synthase)
A0A1S3D1M8	Uncharacterized protein LOC103509599 isoform X1	LOC103509599		tr|A0A1S3D1M8|A0A1S3D1M8_DIACI	tr|A0A1S3D1M8|A0A1S3D1M8_DIACI Uncharacterized protein LOC103509599 isoform X1 OS=Diaphorina citri OX=121845 GN=LOC103509599 PE=4 SV=1	1	2	2	2	18	18.074	88714	49741	93282		19763	26052	Quantified
A0A1S3D1N2	Proliferation-associated protein 2G4	LOC103509465		tr|A0A1S3D1N2|A0A1S3D1N2_DIACI	tr|A0A1S3D1N2|A0A1S3D1N2_DIACI Proliferation-associated protein 2G4 OS=Diaphorina citri OX=121845 GN=LOC103509465 PE=3 SV=1	1	17	17	17	60	44.96	1628500	1888900	1592800	1844400	1938900	2495800	Quantified					PF00557(Metallopeptidase family M24)
A0A1S3D1P7	ADP-ribosylation factor-like protein 8	LOC103509482		tr|A0A1S3D1P7|A0A1S3D1P7_DIACI;tr|A0A3Q0IYU0|A0A3Q0IYU0_DIACI	tr|A0A1S3D1P7|A0A1S3D1P7_DIACI ADP-ribosylation factor-like protein 8 OS=Diaphorina citri OX=121845 GN=LOC103509482 PE=4 SV=1;tr|A0A3Q0IYU0|A0A3Q0IYU0_DIACI ADP-ribosylation factor-like protein 8B-A OS=Diaphorina citri OX=121845 GN=LOC108252427 PE=3 SV=1	2	4	4	4	54.3	10.497	35338	84828	113580	122890	110090	57991	Quantified	GO:0005525(MF:GTP binding)				PF00025(ADP-ribosylation factor family)
A0A1S3D1Q6	phosphoenolpyruvate carboxykinase (GTP)	LOC103509504		tr|A0A1S3D1Q6|A0A1S3D1Q6_DIACI	tr|A0A1S3D1Q6|A0A1S3D1Q6_DIACI phosphoenolpyruvate carboxykinase (GTP) OS=Diaphorina citri OX=121845 GN=LOC103509504 PE=3 SV=1	1	16	15	15	36.2	73.932	1036700	1008700	950660	1647700	1133700	1430500	Quantified	GO:0006094(BP:gluconeogenesis);GO:0005525(MF:GTP binding);GO:0016301(MF:kinase activity);GO:0004613(MF:phosphoenolpyruvate carboxykinase (GTP) activity)				PF17297(Phosphoenolpyruvate carboxykinase N-terminal domain);PF00821(Phosphoenolpyruvate carboxykinase C-terminal P-loop domain)
A0A1S3D1R4	SRSF protein kinase 1-like	LOC103509632		tr|A0A1S3D1R4|A0A1S3D1R4_DIACI	tr|A0A1S3D1R4|A0A1S3D1R4_DIACI SRSF protein kinase 1-like OS=Diaphorina citri OX=121845 GN=LOC103509632 PE=4 SV=1	1	1	1	1	2.4	83.45	217690	226440	309310		284560	155810	Quantified	GO:0005524(MF:ATP binding);GO:0004672(MF:protein kinase activity)				PF00069(Protein kinase domain)
A0A1S3D1S6	Dihydropyrimidinase-like	LOC103509550		tr|A0A1S3D1S6|A0A1S3D1S6_DIACI	tr|A0A1S3D1S6|A0A1S3D1S6_DIACI Dihydropyrimidinase-like OS=Diaphorina citri OX=121845 GN=LOC103509550 PE=3 SV=2	1	17	17	17	49.4	65.267	2518200	2158600	2180600	1936500	2054500	1611100	Quantified	GO:0005737(CC:cytoplasm);GO:0016810(MF:hydrolase activity, acting on carbon-nitrogen (but not peptide) bonds)	K01465(NA)	ko00240(Pyrimidine metabolism);ko01240(Biosynthesis of cofactors)		PF01979(Amidohydrolase family)
Q0PWT8	Cytochrome c oxidase subunit 4 (Fragment)			tr|Q0PWT8|Q0PWT8_DIACI;tr|A0A1S3D1T5|A0A1S3D1T5_DIACI	tr|Q0PWT8|Q0PWT8_DIACI Cytochrome c oxidase subunit 4 (Fragment) OS=Diaphorina citri OX=121845 PE=2 SV=1;tr|A0A1S3D1T5|A0A1S3D1T5_DIACI Cytochrome c oxidase subunit 4 OS=Diaphorina citri OX=121845 GN=LOC103509664 PE=3 SV=1	2	6	6	6	54.8	18.16	7305200	5196200	7827900	9028700	7703700	7351500	Quantified	GO:0016021(CC:integral component of membrane);GO:0004129(MF:cytochrome-c oxidase activity)			Mitochondrion inner membrane;Single-pass membrane protein	PF02936(Cytochrome c oxidase subunit IV)
A0A1S3D1U6	Facilitated trehalose transporter Tret1-like	LOC103509582		tr|A0A1S3D1U6|A0A1S3D1U6_DIACI	tr|A0A1S3D1U6|A0A1S3D1U6_DIACI Facilitated trehalose transporter Tret1-like OS=Diaphorina citri OX=121845 GN=LOC103509582 PE=4 SV=1	1	4	4	4	12.4	57.975	98356	90886	108580	198440	153230	189760	Quantified	GO:0016021(CC:integral component of membrane);GO:0022857(MF:transmembrane transporter activity)				PF00083(Sugar (and other) transporter)
A0A1S3D1V1	Defense protein Hdd11	LOC103508820		tr|A0A1S3D1V1|A0A1S3D1V1_DIACI	tr|A0A1S3D1V1|A0A1S3D1V1_DIACI Defense protein Hdd11 OS=Diaphorina citri OX=121845 GN=LOC103508820 PE=4 SV=1	1	4	4	4	48.2	17.27	97367	150060	127090	175690	60909	41906	Quantified					PF02014(Reeler domain)
A0A1S3D1V5	Striatin-3	LOC103509697		tr|A0A1S3D1V5|A0A1S3D1V5_DIACI;tr|A0A3Q0IYN5|A0A3Q0IYN5_DIACI;tr|A0A1S3D1T8|A0A1S3D1T8_DIACI	tr|A0A1S3D1V5|A0A1S3D1V5_DIACI Striatin-3 OS=Diaphorina citri OX=121845 GN=LOC103509697 PE=4 SV=1;tr|A0A3Q0IYN5|A0A3Q0IYN5_DIACI Striatin-3-like OS=Diaphorina citri OX=121845 GN=LOC103509698 PE=4 SV=1	3	3	3	3	8.7	64.183	167170	118910	137940	96330	92249	103890	Quantified					PF08232(Striatin family);PF00400(WD domain, G-beta repeat)
A0A1S3DRC5	Mitochondrial-processing peptidase subunit alpha-like	LOC103523330		tr|A0A1S3DRC5|A0A1S3DRC5_DIACI;tr|A0A1S3D1W3|A0A1S3D1W3_DIACI	tr|A0A1S3DRC5|A0A1S3DRC5_DIACI Mitochondrial-processing peptidase subunit alpha-like OS=Diaphorina citri OX=121845 GN=LOC103523330 PE=3 SV=1;tr|A0A1S3D1W3|A0A1S3D1W3_DIACI Mitochondrial-processing peptidase subunit alpha-like isoform X1 OS=Diaphorina citri	2	9	9	9	28.5	57.874	898310	862840	918890	620580	1176000	1142500	Quantified	GO:0046872(MF:metal ion binding);GO:0004222(MF:metalloendopeptidase activity)				PF05193(Peptidase M16 inactive domain);PF00675(Insulinase (Peptidase family M16))
A0A1S3D1W5	Superoxide dismutase [Cu-Zn]	LOC103509717	FUNCTION: Destroys radicals which are normally produced within the cells and which are toxic to biological systems. {ECO:0000256|RuleBase:RU000393}.	tr|A0A1S3D1W5|A0A1S3D1W5_DIACI;tr|C5NS97|C5NS97_DIACI	tr|A0A1S3D1W5|A0A1S3D1W5_DIACI Superoxide dismutase [Cu-Zn] OS=Diaphorina citri OX=121845 GN=LOC103509717 PE=3 SV=1;tr|C5NS97|C5NS97_DIACI Copper zinc superoxide dismutase (Fragment) OS=Diaphorina citri OX=121845 GN=CuZN SOD PE=2 SV=1	2	7	7	7	78.1	15.976	17367000	15109000	12019000	13839000	15030000	15442000	Quantified	GO:0046872(MF:metal ion binding);GO:0004784(MF:superoxide dismutase activity)				PF00080(Copper/zinc superoxide dismutase (SODC))
A0A1S3D1W7	Eukaryotic translation initiation factor 5A	LOC103508849		tr|A0A1S3D1W7|A0A1S3D1W7_DIACI	tr|A0A1S3D1W7|A0A1S3D1W7_DIACI Eukaryotic translation initiation factor 5A OS=Diaphorina citri OX=121845 GN=LOC103508849 PE=3 SV=1	1	10	10	10	67.5	17.498	5312200	5064200	3931600	2448700	4535600	5661600	Quantified	GO:0045901(BP:positive regulation of translational elongation);GO:0045905(BP:positive regulation of translational termination);GO:0006452(BP:translational frameshifting);GO:0043022(MF:ribosome binding);GO:0003746(MF:translation elongation factor activity);GO:0003743(MF:translation initiation factor activity)				PF01287(Eukaryotic elongation factor 5A hypusine, DNA-binding OB fold)
A0A1S3DR45	Bifunctional coenzyme A synthase-like	LOC103522925		tr|A0A1S3DR45|A0A1S3DR45_DIACI;tr|A0A1S3D1W9|A0A1S3D1W9_DIACI	tr|A0A1S3DR45|A0A1S3DR45_DIACI Bifunctional coenzyme A synthase-like OS=Diaphorina citri OX=121845 GN=LOC103522925 PE=4 SV=1;tr|A0A1S3D1W9|A0A1S3D1W9_DIACI Bifunctional coenzyme A synthase-like OS=Diaphorina citri OX=121845 GN=LOC103509690 PE=4 SV=1	2	3	3	3	15.3	22.551	133170	143850	140430	168370	173500	161840	Quantified
A0A1S3D1X5	26S proteasome regulatory subunit 7	LOC103509734		tr|A0A1S3D1X5|A0A1S3D1X5_DIACI	tr|A0A1S3D1X5|A0A1S3D1X5_DIACI 26S proteasome regulatory subunit 7 OS=Diaphorina citri OX=121845 GN=LOC103509734 PE=3 SV=1	1	3	3	3	15.9	38.074	195450	189230	19971	642180	165260	440030	Quantified	GO:0000502(CC:proteasome complex);GO:0005524(MF:ATP binding);GO:0036402(MF:proteasome-activating ATPase activity)				PF00004(ATPase family associated with various cellular activities (AAA))
A0A1S3D225	T-complex protein 1 subunit delta	LOC103509713		tr|A0A1S3D225|A0A1S3D225_DIACI	tr|A0A1S3D225|A0A1S3D225_DIACI T-complex protein 1 subunit delta OS=Diaphorina citri OX=121845 GN=LOC103509713 PE=3 SV=1	1	18	18	18	55.7	57.279	917220	1268800	1300500	1503900	1365900	1646200	Quantified	GO:0006457(BP:protein folding);GO:0005737(CC:cytoplasm);GO:0005524(MF:ATP binding);GO:0051082(MF:unfolded protein binding)			Cytoplasm	PF00118(TCP-1/cpn60 chaperonin family)
A0A1S3D228	mannose-6-phosphate isomerase	LOC103509837		tr|A0A1S3D228|A0A1S3D228_DIACI	tr|A0A1S3D228|A0A1S3D228_DIACI mannose-6-phosphate isomerase OS=Diaphorina citri OX=121845 GN=LOC103509837 PE=3 SV=1	1	3	3	3	21.2	26.405	77289	74747	81605	96415	72511	74496	Quantified	GO:0005975(BP:carbohydrate metabolic process);GO:0009298(BP:GDP-mannose biosynthetic process);GO:0004476(MF:mannose-6-phosphate isomerase activity);GO:0008270(MF:zinc ion binding)				PF01238(Phosphomannose isomerase type I)
A0A1S3D229	Uncharacterized protein LOC103509726	LOC103509726		tr|A0A1S3D229|A0A1S3D229_DIACI	tr|A0A1S3D229|A0A1S3D229_DIACI Uncharacterized protein LOC103509726 OS=Diaphorina citri OX=121845 GN=LOC103509726 PE=4 SV=2	1	2	2	2	18.9	19.735	132930	89265	100470	235670	159480	150020	Quantified					PF01709(Transcriptional regulator)
A0A1S3D242	ER membrane protein complex subunit 2	LOC103509838		tr|A0A1S3D242|A0A1S3D242_DIACI	tr|A0A1S3D242|A0A1S3D242_DIACI ER membrane protein complex subunit 2 OS=Diaphorina citri OX=121845 GN=LOC103509838 PE=3 SV=1	1	2	2	2	11.2	33.059	28512	50221	50134		66563	78831	Quantified				Endoplasmic reticulum membrane;Peripheral membrane protein;Cytoplasmic side
A0A1S3D251	Uncharacterized protein LOC103509854	LOC103509854		tr|A0A1S3D251|A0A1S3D251_DIACI	tr|A0A1S3D251|A0A1S3D251_DIACI Uncharacterized protein LOC103509854 OS=Diaphorina citri OX=121845 GN=LOC103509854 PE=4 SV=1	1	1	1	1	2.6	37.978	60105		29505	98931	92537	86954	Quantified	GO:0016021(CC:integral component of membrane)
A0A1S3D255	Sm protein F	LOC103509919	FUNCTION: Associated with the spliceosome snRNP U1, U2, U4/U6 and U5. {ECO:0000256|PIRNR:PIRNR006609}.	tr|A0A1S3D255|A0A1S3D255_DIACI	tr|A0A1S3D255|A0A1S3D255_DIACI Sm protein F OS=Diaphorina citri OX=121845 GN=LOC103509919 PE=3 SV=1	1	4	4	4	61.4	9.7732	177740	254610	216760	83416	316990	381860	Quantified	GO:0000387(BP:spliceosomal snRNP assembly);GO:0005732(CC:small nucleolar ribonucleoprotein complex);GO:0005681(CC:spliceosomal complex);GO:0003723(MF:RNA binding)			Nucleus	PF01423(LSM domain)
A0A1S3D262	Endophilin-B2 isoform X1	LOC103509012		tr|A0A1S3D262|A0A1S3D262_DIACI;tr|A0A1S3D0P9|A0A1S3D0P9_DIACI	tr|A0A1S3D262|A0A1S3D262_DIACI Endophilin-B2 isoform X1 OS=Diaphorina citri OX=121845 GN=LOC103509012 PE=4 SV=1;tr|A0A1S3D0P9|A0A1S3D0P9_DIACI Endophilin-B1 isoform X2 OS=Diaphorina citri OX=121845 GN=LOC103509012 PE=4 SV=1	2	4	4	4	19.4	33.5	436470	369890	278290	517580	321300	123710	Quantified	GO:0005737(CC:cytoplasm)				PF03114(BAR domain)
A0A1S3D277	Translation initiation factor eIF-2B subunit gamma	LOC103509044		tr|A0A1S3D277|A0A1S3D277_DIACI	tr|A0A1S3D277|A0A1S3D277_DIACI Translation initiation factor eIF-2B subunit gamma OS=Diaphorina citri OX=121845 GN=LOC103509044 PE=4 SV=2	1	2	2	2	9.4	35.776	12438	31759	38746		25464	37291	Quantified	GO:0003743(MF:translation initiation factor activity)				PF00132(Bacterial transferase hexapeptide (six repeats))
A0A1S3D2C9	Acidic leucine-rich nuclear phosphoprotein 32 family member A-like	LOC103509130		tr|A0A1S3D2C9|A0A1S3D2C9_DIACI	tr|A0A1S3D2C9|A0A1S3D2C9_DIACI Acidic leucine-rich nuclear phosphoprotein 32 family member A-like OS=Diaphorina citri OX=121845 GN=LOC103509130 PE=3 SV=1	1	6	6	6	52.4	13.746	799290	655260	582640	545420	523700	514240	Quantified					PF12799(Leucine Rich repeats (2 copies))
A0A1S3D2D0	6-phosphogluconate dehydrogenase, decarboxylating	LOC103510040		tr|A0A1S3D2D0|A0A1S3D2D0_DIACI	tr|A0A1S3D2D0|A0A1S3D2D0_DIACI 6-phosphogluconate dehydrogenase, decarboxylating OS=Diaphorina citri OX=121845 GN=LOC103510040 PE=3 SV=1	1	13	13	13	59.6	37.711	3238700	3841800	3521500	4373400	4020600	4033500	Quantified	GO:0019521(BP:D-gluconate metabolic process);GO:0006098(BP:pentose-phosphate shunt);GO:0050661(MF:NADP binding);GO:0004616(MF:phosphogluconate dehydrogenase (decarboxylating) activity)				PF00393(6-phosphogluconate dehydrogenase, C-terminal domain);PF03446(NAD binding domain of 6-phosphogluconate dehydrogenase)
A0A1S3D2D9	Copper transport protein	LOC103509151		tr|A0A1S3D2D9|A0A1S3D2D9_DIACI;tr|A0A3Q0JPM0|A0A3Q0JPM0_DIACI	tr|A0A1S3D2D9|A0A1S3D2D9_DIACI Copper transport protein OS=Diaphorina citri OX=121845 GN=LOC103509151 PE=3 SV=1;tr|A0A3Q0JPM0|A0A3Q0JPM0_DIACI Copper transport protein OS=Diaphorina citri OX=121845 GN=LOC103523459 PE=3 SV=1	2	2	2	2	16	15.076	117600	152710	178140		112650	112150	Quantified	GO:0016021(CC:integral component of membrane);GO:0005375(MF:copper ion transmembrane transporter activity)			Late endosome membrane;Multi-pass membrane protein;Membrane	PF04145(Ctr copper transporter family)
A0A1S3D2E1	Acyl-CoA-binding protein homolog	LOC103510020		tr|A0A1S3D2E1|A0A1S3D2E1_DIACI	tr|A0A1S3D2E1|A0A1S3D2E1_DIACI Acyl-CoA-binding protein homolog OS=Diaphorina citri OX=121845 GN=LOC103510020 PE=4 SV=1	1	1	1	1	17	10.257		8452.1	1771.1				Quantified	GO:0000062(MF:fatty-acyl-CoA binding)				PF00887(Acyl CoA binding protein)
A0A1S3D2E5	Ras-related protein Rab-39B-like	LOC103509164		tr|A0A1S3D2E5|A0A1S3D2E5_DIACI	tr|A0A1S3D2E5|A0A1S3D2E5_DIACI Ras-related protein Rab-39B-like OS=Diaphorina citri OX=121845 GN=LOC103509164 PE=4 SV=1	1	1	1	1	18.4	9.6631	90224			6072.2			Identified	GO:0016021(CC:integral component of membrane);GO:0005525(MF:GTP binding);GO:0003924(MF:GTPase activity)				PF00071(Ras family)
A0A1S3D2F1	Regucalcin-like	LOC103509948		tr|A0A1S3D2F1|A0A1S3D2F1_DIACI	tr|A0A1S3D2F1|A0A1S3D2F1_DIACI Regucalcin-like OS=Diaphorina citri OX=121845 GN=LOC103509948 PE=3 SV=2	1	8	4	4	47.1	17.12	2025000	1751600	1366600	1431700	1108500	896040	Quantified					PF08450(SMP-30/Gluconolaconase/LRE-like region)
A0A1S3D2G7	Glyceraldehyde-3-phosphate dehydrogenase	LOC103509971		tr|A0A1S3D2G7|A0A1S3D2G7_DIACI	tr|A0A1S3D2G7|A0A1S3D2G7_DIACI Glyceraldehyde-3-phosphate dehydrogenase OS=Diaphorina citri OX=121845 GN=LOC103509971 PE=3 SV=1	1	10	8	8	45.6	39.302	392230	460760	537920	153350	354800	403440	Quantified	GO:0006006(BP:glucose metabolic process);GO:0006096(BP:glycolytic process);GO:0004365(MF:glyceraldehyde-3-phosphate dehydrogenase (NAD+) (phosphorylating) activity);GO:0051287(MF:NAD binding);GO:0050661(MF:NADP binding)	K00134(NA)	ko00010(Glycolysis / Gluconeogenesis);ko00710(Carbon fixation in photosynthetic organisms);ko04066(HIF-1 signaling pathway)		PF02800(Glyceraldehyde 3-phosphate dehydrogenase, C-terminal domain);PF00044(Glyceraldehyde 3-phosphate dehydrogenase, NAD binding domain)
A0A1S3D2G9	60S ribosomal protein L7a	LOC103509200	FUNCTION: Component of the ribosome. {ECO:0000256|RuleBase:RU367042}.	tr|A0A1S3D2G9|A0A1S3D2G9_DIACI;tr|Q0PWV1|Q0PWV1_DIACI	tr|A0A1S3D2G9|A0A1S3D2G9_DIACI 60S ribosomal protein L7a OS=Diaphorina citri OX=121845 GN=LOC103509200 PE=3 SV=1;tr|Q0PWV1|Q0PWV1_DIACI 60S ribosomal protein L7a (Fragment) OS=Diaphorina citri OX=121845 PE=2 SV=1	2	10	10	10	37.1	30.864	1180800	2421000	1860000	3333500	2551400	3329100	Quantified	GO:0042254(BP:ribosome biogenesis);GO:1990904(CC:ribonucleoprotein complex);GO:0005840(CC:ribosome)				PF01248(Ribosomal protein L7Ae/L30e/S12e/Gadd45 family)
A0A1S3D2H4	5-demethoxyubiquinone hydroxylase, mitochondrial	LOC103510079	FUNCTION: Catalyzes the hydroxylation of 2-polyprenyl-3-methyl-6-methoxy-1,4-benzoquinol (DMQH2) during ubiquinone biosynthesis. Has also a structural role in the COQ enzyme complex, stabilizing other COQ polypeptides. Involved in lifespan determination in a ubiquinone-independent manner. {ECO:0000256|HAMAP-Rule:MF_03194}.	tr|A0A1S3D2H4|A0A1S3D2H4_DIACI;tr|A0A1S3DNL0|A0A1S3DNL0_DIACI	tr|A0A1S3D2H4|A0A1S3D2H4_DIACI 5-demethoxyubiquinone hydroxylase, mitochondrial OS=Diaphorina citri OX=121845 GN=LOC103510079 PE=3 SV=1;tr|A0A1S3DNL0|A0A1S3DNL0_DIACI 5-demethoxyubiquinone hydroxylase, mitochondrial OS=Diaphorina citri OX=121845 GN=LOC1035	2	3	1	1	25.6	21.803	70514	271.67	102980	5313.4			Quantified	GO:0006744(BP:ubiquinone biosynthetic process);GO:0031314(CC:extrinsic component of mitochondrial inner membrane);GO:0046872(MF:metal ion binding);GO:0016709(MF:oxidoreductase activity, acting on paired donors, with incorporation or reduction of molecular oxygen, NAD(P)H as one donor, and incorporation of one atom of oxygen)	K06134(NA)	ko00130(Ubiquinone and other terpenoid-quinone biosynthesis);ko01240(Biosynthesis of cofactors)	Mitochondrion inner membrane;Peripheral membrane protein;Matrix side	PF03232(Ubiquinone biosynthesis protein COQ7)
A0A1S3D2I9	Translationally-controlled tumor protein homolog	LOC103509255		tr|A0A1S3D2I9|A0A1S3D2I9_DIACI;tr|A0A3Q0IT48|A0A3Q0IT48_DIACI	tr|A0A1S3D2I9|A0A1S3D2I9_DIACI Translationally-controlled tumor protein homolog OS=Diaphorina citri OX=121845 GN=LOC103509255 PE=3 SV=1;tr|A0A3Q0IT48|A0A3Q0IT48_DIACI Translationally-controlled tumor protein homolog OS=Diaphorina citri OX=121845 GN=LOC1035	2	7	7	7	56.2	16.771	1971000	1621600	1722500	2735300	2215100	2754600	Quantified					PF00838(Translationally controlled tumour protein)
A0A1S3D2J2	COP9 signalosome complex subunit 3	LOC103510012		tr|A0A1S3D2J2|A0A1S3D2J2_DIACI	tr|A0A1S3D2J2|A0A1S3D2J2_DIACI COP9 signalosome complex subunit 3 OS=Diaphorina citri OX=121845 GN=LOC103510012 PE=4 SV=1	1	5	5	5	19.5	49.541	162350	154870	223210	328920	229260	210390	Quantified	GO:0008180(CC:COP9 signalosome);GO:0005737(CC:cytoplasm)				PF01399(PCI domain)
A0A1S3D2L2	Glutathione hydrolase 1 proenzyme	LOC103510162		tr|A0A1S3D2L2|A0A1S3D2L2_DIACI;tr|A0A3Q0IZF9|A0A3Q0IZF9_DIACI	tr|A0A1S3D2L2|A0A1S3D2L2_DIACI Glutathione hydrolase 1 proenzyme OS=Diaphorina citri OX=121845 GN=LOC103510162 PE=4 SV=2;tr|A0A3Q0IZF9|A0A3Q0IZF9_DIACI Glutathione hydrolase 1 proenzyme-like OS=Diaphorina citri OX=121845 GN=LOC113465335 PE=4 SV=1	2	3	3	3	9.7	55.977	25015	42807	61763	22094	39298	38837	Quantified	GO:0006751(BP:glutathione catabolic process);GO:0036374(MF:glutathione hydrolase activity)				PF01019(Gamma-glutamyltranspeptidase)
A0A1S3D2Q2	Uncharacterized protein LOC103510254 isoform X1	LOC103510254		tr|A0A1S3D2Q2|A0A1S3D2Q2_DIACI;tr|A0A1S3D2W9|A0A1S3D2W9_DIACI	tr|A0A1S3D2Q2|A0A1S3D2Q2_DIACI Uncharacterized protein LOC103510254 isoform X1 OS=Diaphorina citri OX=121845 GN=LOC103510254 PE=4 SV=1;tr|A0A1S3D2W9|A0A1S3D2W9_DIACI Uncharacterized protein LOC103510254 isoform X6 OS=Diaphorina citri OX=121845 GN=LOC103510	2	6	1	1	31.7	32.515	51959	62227	33385	64000	45536	106090	Quantified					PF16984(Group 7 allergen)
A0A1S3D2Q5	CCHC-type zinc finger protein CG3800-like	LOC103510257		tr|A0A1S3D2Q5|A0A1S3D2Q5_DIACI	tr|A0A1S3D2Q5|A0A1S3D2Q5_DIACI CCHC-type zinc finger protein CG3800-like OS=Diaphorina citri OX=121845 GN=LOC103510257 PE=4 SV=1	1	3	3	3	29.1	16.837	366390	49101	118960	288450	302430	384800	Quantified	GO:0003676(MF:nucleic acid binding);GO:0008270(MF:zinc ion binding)				PF00098(Zinc knuckle)
A0A1S3D2R0	60S ribosomal protein L10a-like	LOC103510129		tr|A0A1S3D2R0|A0A1S3D2R0_DIACI;tr|Q0PWU7|Q0PWU7_DIACI	tr|A0A1S3D2R0|A0A1S3D2R0_DIACI 60S ribosomal protein L10a-like OS=Diaphorina citri OX=121845 GN=LOC103510129 PE=4 SV=1;tr|Q0PWU7|Q0PWU7_DIACI Large ribosomal subunit protein uL1 (Fragment) OS=Diaphorina citri OX=121845 PE=2 SV=1	2	8	8	8	32.6	31.425	1505100	2015200	1769800	2478500	2297000	2684200	Quantified	GO:0005840(CC:ribosome)				PF00687(Ribosomal protein L1p/L10e family)
A0A1S3D2R5	Reactive oxygen species modulator 1	LOC103509371		tr|A0A1S3D2R5|A0A1S3D2R5_DIACI	tr|A0A1S3D2R5|A0A1S3D2R5_DIACI Reactive oxygen species modulator 1 OS=Diaphorina citri OX=121845 GN=LOC103509371 PE=3 SV=1	1	1	1	1	20.5	7.9844		51159	62430	266550	81349	90234	Quantified	GO:0016021(CC:integral component of membrane)				PF10247(Reactive mitochondrial oxygen species modulator 1)
A0A1S3D2S3	Protein transport protein Sec61 subunit alpha isoform X1	LOC103510285		tr|A0A1S3D2S3|A0A1S3D2S3_DIACI	tr|A0A1S3D2S3|A0A1S3D2S3_DIACI Protein transport protein Sec61 subunit alpha isoform X1 OS=Diaphorina citri OX=121845 GN=LOC103510285 PE=3 SV=1	1	5	5	5	17	52.311	439030	506450	416000	700850	673880	772100	Quantified	GO:0015031(BP:protein transport);GO:0016021(CC:integral component of membrane)			Membrane;Multi-pass membrane protein	PF00344(SecY translocase);PF10559(Plug domain of Sec61p)
A0A1S3D2S5	Uncharacterized protein LOC103510161	LOC103510161		tr|A0A1S3D2S5|A0A1S3D2S5_DIACI	tr|A0A1S3D2S5|A0A1S3D2S5_DIACI Uncharacterized protein LOC103510161 OS=Diaphorina citri OX=121845 GN=LOC103510161 PE=4 SV=1	1	1	1	1	21.2	9.6863	132210	182460	79302	193020	123250	144100	Quantified					PF10195(DNA-binding nuclear phosphoprotein p8)
A0A1S3D2U1	Fructose-bisphosphate aldolase	LOC103510324		tr|A0A1S3D2U1|A0A1S3D2U1_DIACI	tr|A0A1S3D2U1|A0A1S3D2U1_DIACI Fructose-bisphosphate aldolase OS=Diaphorina citri OX=121845 GN=LOC103510324 PE=3 SV=1	1	7	6	6	26.9	39.167	561580	422070	634410	455270	610670	600830	Quantified	GO:0006096(BP:glycolytic process);GO:0004332(MF:fructose-bisphosphate aldolase activity)				PF00274(Fructose-bisphosphate aldolase class-I)
A0A1S3D2U7	Transmembrane protein 177	LOC103510337		tr|A0A1S3D2U7|A0A1S3D2U7_DIACI	tr|A0A1S3D2U7|A0A1S3D2U7_DIACI Transmembrane protein 177 OS=Diaphorina citri OX=121845 GN=LOC103510337 PE=4 SV=2	1	4	4	4	17.8	26.3	140400	149540	165930	219530	347460	63522	Quantified	GO:0016021(CC:integral component of membrane)
A0A1S3D2W5	Uncharacterized protein LOC103510362	LOC103510362		tr|A0A1S3D2W5|A0A1S3D2W5_DIACI	tr|A0A1S3D2W5|A0A1S3D2W5_DIACI Uncharacterized protein LOC103510362 OS=Diaphorina citri OX=121845 GN=LOC103510362 PE=4 SV=2	1	2	2	2	3.5	56.139	37010	71959	32918	49240	40992	30385	Quantified	GO:0042302(MF:structural constituent of cuticle)				PF00379(Insect cuticle protein)
A0A1S3D2X5	Choline transporter-like protein	LOC103510375		tr|A0A1S3D2X5|A0A1S3D2X5_DIACI;tr|A0A1S4EDW2|A0A1S4EDW2_DIACI	tr|A0A1S3D2X5|A0A1S3D2X5_DIACI Choline transporter-like protein OS=Diaphorina citri OX=121845 GN=LOC103510375 PE=3 SV=1;tr|A0A1S4EDW2|A0A1S4EDW2_DIACI Choline transporter-like protein OS=Diaphorina citri OX=121845 GN=LOC103510909 PE=3 SV=1	2	2	2	2	5.9	62.109	52826	44944	74037	12563	13094	17206	Quantified	GO:0016021(CC:integral component of membrane)			Cell membrane;Multi-pass membrane protein;Membrane	PF04515(Plasma-membrane choline transporter)
A0A1S3D2Z2	Large ribosomal subunit protein mL46	LOC103510439		tr|A0A1S3D2Z2|A0A1S3D2Z2_DIACI;tr|A0A1S3DQT7|A0A1S3DQT7_DIACI	tr|A0A1S3D2Z2|A0A1S3D2Z2_DIACI Large ribosomal subunit protein mL46 OS=Diaphorina citri OX=121845 GN=LOC103510439 PE=3 SV=1;tr|A0A1S3DQT7|A0A1S3DQT7_DIACI 39S ribosomal protein L46, mitochondrial-like OS=Diaphorina citri OX=121845 GN=LOC103523104 PE=4 SV=1	2	2	2	2	5.4	32.517	50799	23394	19096	23298	14385	28180	Quantified	GO:0005840(CC:ribosome);GO:0016787(MF:hydrolase activity);GO:0003735(MF:structural constituent of ribosome)			Mitochondrion	PF11788(39S mitochondrial ribosomal protein L46)
A0A1S3D320	Uncharacterized protein LOC103510441 isoform X1	LOC103510441		tr|A0A1S3D320|A0A1S3D320_DIACI;tr|A0A1S3D4J4|A0A1S3D4J4_DIACI;tr|A0A1S3DR98|A0A1S3DR98_DIACI	tr|A0A1S3D320|A0A1S3D320_DIACI Uncharacterized protein LOC103510441 isoform X1 OS=Diaphorina citri OX=121845 GN=LOC103510441 PE=4 SV=1;tr|A0A1S3D4J4|A0A1S3D4J4_DIACI Uncharacterized protein LOC103510441 isoform X2 OS=Diaphorina citri OX=121845 GN=LOC103510	3	4	4	4	25.8	28.877	863410	662580	565510	1380500	1103100	1035900	Quantified
A0A1S3D331	Uncharacterized protein LOC103509555	LOC103509555		tr|A0A1S3D331|A0A1S3D331_DIACI	tr|A0A1S3D331|A0A1S3D331_DIACI Uncharacterized protein LOC103509555 OS=Diaphorina citri OX=121845 GN=LOC103509555 PE=4 SV=1	1	7	7	7	20.2	54.506	316560	221660	686820	147720	201830	100090	Quantified
A0A1S3D344	Surfeit locus protein 4 homolog	LOC103510380		tr|A0A1S3D344|A0A1S3D344_DIACI	tr|A0A1S3D344|A0A1S3D344_DIACI Surfeit locus protein 4 homolog OS=Diaphorina citri OX=121845 GN=LOC103510380 PE=3 SV=1	1	6	6	6	24.3	31.912	365750	387260	429970	780150	527740	627110	Quantified	GO:0016021(CC:integral component of membrane)			Endoplasmic reticulum membrane;Multi-pass membrane protein;Membrane	PF02077(SURF4 family)
A0A1S3D354	V-type proton ATPase subunit F	LOC103510477	FUNCTION: Subunit of the peripheral V1 complex of vacuolar ATPase essential for assembly or catalytic function. V-ATPase is responsible for acidifying a variety of intracellular compartments in eukaryotic cells. {ECO:0000256|PIRNR:PIRNR015945}.	tr|A0A1S3D354|A0A1S3D354_DIACI	tr|A0A1S3D354|A0A1S3D354_DIACI V-type proton ATPase subunit F OS=Diaphorina citri OX=121845 GN=LOC103510477 PE=3 SV=1	1	8	8	8	81.5	13.758	1522000	1576600	1247100	1001600	1281500	1609200	Quantified	GO:0033180(CC:proton-transporting V-type ATPase, V1 domain);GO:0046961(MF:proton-transporting ATPase activity, rotational mechanism)				PF01990(ATP synthase (F/14-kDa) subunit)
A0A1S3D365	Protein ABHD16A	LOC103509612		tr|A0A1S3D365|A0A1S3D365_DIACI	tr|A0A1S3D365|A0A1S3D365_DIACI Protein ABHD16A OS=Diaphorina citri OX=121845 GN=LOC103509612 PE=4 SV=1	1	4	4	4	10.8	56.843	71251	24640	60920	66159	67931	94979	Quantified	GO:0016021(CC:integral component of membrane)				PF00561(alpha/beta hydrolase fold)
A0A1S3D367	Cytoplasmic phosphatidylinositol transfer protein 1	LOC103510487		tr|A0A1S3D367|A0A1S3D367_DIACI	tr|A0A1S3D367|A0A1S3D367_DIACI Cytoplasmic phosphatidylinositol transfer protein 1 OS=Diaphorina citri OX=121845 GN=LOC103510487 PE=4 SV=1	1	6	6	6	34.1	32.372	125040	146840	166180	46082	165030	218770	Quantified	GO:0005548(MF:phospholipid transporter activity)				PF02121(Phosphatidylinositol transfer protein)
A0A1S3D369	Eukaryotic translation initiation factor 3 subunit A	LOC103510513		tr|A0A1S3D369|A0A1S3D369_DIACI	tr|A0A1S3D369|A0A1S3D369_DIACI Eukaryotic translation initiation factor 3 subunit A OS=Diaphorina citri OX=121845 GN=LOC103510513 PE=4 SV=1	1	14	14	14	22.3	106.42	375680	460910	471370	919410	562560	684430	Quantified	GO:0005852(CC:eukaryotic translation initiation factor 3 complex);GO:0003743(MF:translation initiation factor activity)
A0A1S3D383	phenylalanine--tRNA ligase	LOC103510531		tr|A0A1S3D383|A0A1S3D383_DIACI;tr|A0A1S3D397|A0A1S3D397_DIACI	tr|A0A1S3D383|A0A1S3D383_DIACI phenylalanine--tRNA ligase OS=Diaphorina citri OX=121845 GN=LOC103510531 PE=3 SV=1;tr|A0A1S3D397|A0A1S3D397_DIACI Phenylalanine--tRNA ligase alpha subunit-like OS=Diaphorina citri OX=121845 GN=LOC103510535 PE=4 SV=1	2	7	7	7	27.2	55.728	332280	304180	305730	467550	266080	334940	Quantified	GO:0006432(BP:phenylalanyl-tRNA aminoacylation);GO:0005737(CC:cytoplasm);GO:0005524(MF:ATP binding);GO:0004826(MF:phenylalanine-tRNA ligase activity);GO:0000049(MF:tRNA binding)	K01889(NA)	ko00970(Aminoacyl-tRNA biosynthesis)		PF01409(tRNA synthetases class II core domain (F))
A0A1S3D3A2	NEDD8-activating enzyme E1 catalytic subunit	LOC103510542		tr|A0A1S3D3A2|A0A1S3D3A2_DIACI;tr|A0A1S3DNP3|A0A1S3DNP3_DIACI	tr|A0A1S3D3A2|A0A1S3D3A2_DIACI NEDD8-activating enzyme E1 catalytic subunit OS=Diaphorina citri OX=121845 GN=LOC103510542 PE=3 SV=1;tr|A0A1S3DNP3|A0A1S3DNP3_DIACI Nedd8-activating enzyme E1 catalytic subunit-like OS=Diaphorina citri OX=121845 GN=LOC1035221	2	2	2	2	12.1	49.405	12800	31304	33038	13019	18649	19781	Quantified	GO:0045116(BP:protein neddylation);GO:0019781(MF:NEDD8 activating enzyme activity)				PF00899(ThiF family);PF08825(E2 binding domain)
A0A1S3D3A5	Uncharacterized protein LOC103509668	LOC103509668		tr|A0A1S3D3A5|A0A1S3D3A5_DIACI	tr|A0A1S3D3A5|A0A1S3D3A5_DIACI Uncharacterized protein LOC103509668 OS=Diaphorina citri OX=121845 GN=LOC103509668 PE=4 SV=1	1	1	1	1	6.8	24.881	35877	3592.6	40523		83830		Quantified
A0A1S3DJJ7	Pro-resilin-like	LOC103519740		tr|A0A1S3DJJ7|A0A1S3DJJ7_DIACI;tr|A0A1S3D4U2|A0A1S3D4U2_DIACI;tr|A0A1S3D3B7|A0A1S3D3B7_DIACI	tr|A0A1S3DJJ7|A0A1S3DJJ7_DIACI Pro-resilin-like OS=Diaphorina citri OX=121845 GN=LOC103519740 PE=4 SV=1;tr|A0A1S3D4U2|A0A1S3D4U2_DIACI Pro-resilin-like isoform X3 OS=Diaphorina citri OX=121845 GN=LOC103510569 PE=4 SV=1;tr|A0A1S3D3B7|A0A1S3D3B7_DIACI Pro-re	3	6	6	6	46.3	14.407	3032500	2913700	2225100	2656800	2478900	2027200	Quantified	GO:0042302(MF:structural constituent of cuticle)				PF00379(Insect cuticle protein)
A0A1S3D3C2	Bifunctional coenzyme A synthase-like	LOC103509691		tr|A0A1S3D3C2|A0A1S3D3C2_DIACI	tr|A0A1S3D3C2|A0A1S3D3C2_DIACI Bifunctional coenzyme A synthase-like OS=Diaphorina citri OX=121845 GN=LOC103509691 PE=4 SV=1	1	4	4	4	27.2	25.91	64524	99232	147450	60027	48132	44086	Quantified	GO:0015937(BP:coenzyme A biosynthetic process);GO:0005524(MF:ATP binding);GO:0004140(MF:dephospho-CoA kinase activity)	K00859(NA)	ko00770(Pantothenate and CoA biosynthesis);ko01240(Biosynthesis of cofactors)		PF01121(Dephospho-CoA kinase)
A0A1S3D3C5	NADH dehydrogenase [ubiquinone] 1 alpha subcomplex subunit 7	LOC103510596		tr|A0A1S3D3C5|A0A1S3D3C5_DIACI	tr|A0A1S3D3C5|A0A1S3D3C5_DIACI NADH dehydrogenase [ubiquinone] 1 alpha subcomplex subunit 7 OS=Diaphorina citri OX=121845 GN=LOC103510596 PE=3 SV=1	1	5	5	5	76.1	10.416	4577400	3629800	3865000	1862400	4465600	3214700	Quantified	GO:0042773(BP:ATP synthesis coupled electron transport);GO:0005743(CC:mitochondrial inner membrane);GO:0008137(MF:NADH dehydrogenase (ubiquinone) activity)				PF07347(NADH:ubiquinone oxidoreductase subunit B14.5a (Complex I-B14.5a))
A0A1S3D3D9	pyridoxal 5-phosphate synthase	LOC103510503		tr|A0A1S3D3D9|A0A1S3D3D9_DIACI	tr|A0A1S3D3D9|A0A1S3D3D9_DIACI pyridoxal 5-phosphate synthase OS=Diaphorina citri OX=121845 GN=LOC103510503 PE=3 SV=1	1	1	1	1	6	28.682	6506.4				12098	22285	Quantified	GO:0008615(BP:pyridoxine biosynthetic process);GO:0010181(MF:FMN binding);GO:0004733(MF:pyridoxamine-phosphate oxidase activity)	K00275(NA)	ko00750(Vitamin B6 metabolism);ko01240(Biosynthesis of cofactors)		PF01243(Pyridoxamine 5'-phosphate oxidase)
A0A1S3D3E8	dolichyl-phosphate beta-glucosyltransferase	LOC103510627		tr|A0A1S3D3E8|A0A1S3D3E8_DIACI	tr|A0A1S3D3E8|A0A1S3D3E8_DIACI dolichyl-phosphate beta-glucosyltransferase OS=Diaphorina citri OX=121845 GN=LOC103510627 PE=3 SV=1	1	2	2	2	7.1	38.678	12341	16870	18761	27745	4014.5	60481	Quantified	GO:0016021(CC:integral component of membrane);GO:0016740(MF:transferase activity)				PF00535(Glycosyl transferase family 2)
A0A1S3D3G1	ATP synthase subunit s, mitochondrial-like	LOC103510654		tr|A0A1S3D3G1|A0A1S3D3G1_DIACI	tr|A0A1S3D3G1|A0A1S3D3G1_DIACI ATP synthase subunit s, mitochondrial-like OS=Diaphorina citri OX=121845 GN=LOC103510654 PE=4 SV=1	1	4	4	4	28.9	22.328	180640	158280	207680	348160	192590	212960	Quantified
A0A3Q0IW35	KH domain-containing, RNA-binding, signal transduction-associated protein 2-like isoform X3	LOC103510682		tr|A0A3Q0IW35|A0A3Q0IW35_DIACI;tr|A0A1S3D3H1|A0A1S3D3H1_DIACI	tr|A0A3Q0IW35|A0A3Q0IW35_DIACI KH domain-containing, RNA-binding, signal transduction-associated protein 2-like isoform X3 OS=Diaphorina citri OX=121845 GN=LOC103510682 PE=4 SV=1;tr|A0A1S3D3H1|A0A1S3D3H1_DIACI KH domain-containing, RNA-binding, signal tran	2	5	5	5	17.3	42.491	127750	494930	204410	157150	342630	163290	Quantified	GO:0003723(MF:RNA binding)				PF00013(KH domain)
A0A1S3D3H5	Protein-L-isoaspartate(D-aspartate) O-methyltransferase-like	LOC103510692		tr|A0A1S3D3H5|A0A1S3D3H5_DIACI	tr|A0A1S3D3H5|A0A1S3D3H5_DIACI Protein-L-isoaspartate(D-aspartate) O-methyltransferase-like OS=Diaphorina citri OX=121845 GN=LOC103510692 PE=3 SV=1	1	9	9	9	46	38.747	879050	1010800	699110	799910	1044400	1402500	Quantified	GO:0004719(MF:protein-L-isoaspartate (D-aspartate) O-methyltransferase activity)				PF01135(Protein-L-isoaspartate(D-aspartate) O-methyltransferase (PCMT))
A0A1S3D3I4	NADH dehydrogenase [ubiquinone] 1 alpha subcomplex assembly factor 2	LOC103510714		tr|A0A1S3D3I4|A0A1S3D3I4_DIACI	tr|A0A1S3D3I4|A0A1S3D3I4_DIACI NADH dehydrogenase [ubiquinone] 1 alpha subcomplex assembly factor 2 OS=Diaphorina citri OX=121845 GN=LOC103510714 PE=3 SV=1	1	3	3	3	30.2	17.209	5846.1	120050	141590	115710	60187	31465	Quantified	GO:0016020(CC:membrane);GO:0009055(MF:electron transfer activity);GO:0008137(MF:NADH dehydrogenase (ubiquinone) activity)				PF05071(NADH ubiquinone oxidoreductase subunit NDUFA12)
A0A1S3D3J2	Metastasis-associated protein MTA1	LOC103521734		tr|A0A1S3D3J2|A0A1S3D3J2_DIACI	tr|A0A1S3D3J2|A0A1S3D3J2_DIACI Metastasis-associated protein MTA1 OS=Diaphorina citri OX=121845 GN=LOC103521734 PE=4 SV=1	1	1	1	1	6.4	36.905	4409600	3373800	2669400	5450800	3887100	3378300	Quantified	GO:0005634(CC:nucleus);GO:0003677(MF:DNA binding)				PF17226(MTA R1 domain);PF00249(Myb-like DNA-binding domain)
A0A1S3D3J3	E3 ubiquitin-protein ligase RNF181	LOC103509834		tr|A0A1S3D3J3|A0A1S3D3J3_DIACI	tr|A0A1S3D3J3|A0A1S3D3J3_DIACI E3 ubiquitin-protein ligase RNF181 OS=Diaphorina citri OX=121845 GN=LOC103509834 PE=4 SV=1	1	3	3	3	44.4	16.579	70743	65299	57710	62211	57527	61810	Quantified					PF13639(Ring finger domain)
A0A1S3D3L2	Uncharacterized protein LOC103509867	LOC103509867		tr|A0A1S3D3L2|A0A1S3D3L2_DIACI	tr|A0A1S3D3L2|A0A1S3D3L2_DIACI Uncharacterized protein LOC103509867 OS=Diaphorina citri OX=121845 GN=LOC103509867 PE=4 SV=1	1	3	3	3	23.8	22.454	110340	55624	58519	140900	127950	179010	Quantified	GO:0003676(MF:nucleic acid binding)
A0A1S3D3L3	Ras-like GTP-binding protein Rho1	LOC103510737		tr|A0A1S3D3L3|A0A1S3D3L3_DIACI	tr|A0A1S3D3L3|A0A1S3D3L3_DIACI Ras-like GTP-binding protein Rho1 OS=Diaphorina citri OX=121845 GN=LOC103510737 PE=4 SV=1	1	9	9	9	65.6	21.721	823260	1727400	1212400	712280	1687100	1734100	Quantified	GO:0007264(BP:small GTPase mediated signal transduction);GO:0005525(MF:GTP binding);GO:0003924(MF:GTPase activity)				PF00071(Ras family)
A0A1S3D3N4	28S ribosomal protein S35, mitochondrial	LOC103510776		tr|A0A1S3D3N4|A0A1S3D3N4_DIACI;tr|A0A1S3D560|A0A1S3D560_DIACI	tr|A0A1S3D3N4|A0A1S3D3N4_DIACI 28S ribosomal protein S35, mitochondrial OS=Diaphorina citri OX=121845 GN=LOC103510776 PE=4 SV=1	2	5	5	5	23.3	40.2	126360	77543	55469	170720	70197	91729	Quantified	GO:0032543(BP:mitochondrial translation);GO:0005739(CC:mitochondrion);GO:0005840(CC:ribosome);GO:0003735(MF:structural constituent of ribosome)				PF10213(Mitochondrial ribosomal subunit protein)
A0A1S3D3N5	Uncharacterized protein LOC103510798	LOC103510798		tr|A0A1S3D3N5|A0A1S3D3N5_DIACI;tr|A0A1S3D3N8|A0A1S3D3N8_DIACI	tr|A0A1S3D3N5|A0A1S3D3N5_DIACI Uncharacterized protein LOC103510798 OS=Diaphorina citri OX=121845 GN=LOC103510798 PE=4 SV=1	2	11	11	11	52.9	26.884	554970	932840	875980	1145800	839230	748710	Quantified
A0A1S3D3S4	Prohibitin	LOC103510840		tr|A0A1S3D3S4|A0A1S3D3S4_DIACI	tr|A0A1S3D3S4|A0A1S3D3S4_DIACI Prohibitin OS=Diaphorina citri OX=121845 GN=LOC103510840 PE=3 SV=1	1	11	11	11	52.5	29.062	3084000	3053900	3272400	5887300	4481800	4319800	Quantified	GO:0005743(CC:mitochondrial inner membrane)			Mitochondrion inner membrane	PF01145(SPFH domain / Band 7 family)
A0A3Q0IQ85	E3 ubiquitin-protein ligase KCMF1-like	LOC103505806		tr|A0A3Q0IQ85|A0A3Q0IQ85_DIACI;tr|A0A1S3D3T4|A0A1S3D3T4_DIACI	tr|A0A3Q0IQ85|A0A3Q0IQ85_DIACI E3 ubiquitin-protein ligase KCMF1-like OS=Diaphorina citri OX=121845 GN=LOC103505806 PE=4 SV=1;tr|A0A1S3D3T4|A0A1S3D3T4_DIACI E3 ubiquitin-protein ligase KCMF1 isoform X1 OS=Diaphorina citri OX=121845 GN=LOC103510853 PE=4 SV=	2	1	1	1	6	31.569	23557	8984.4	13710	10614	2625.5	3296.6	Quantified	GO:0061630(MF:ubiquitin protein ligase activity)				PF05605(Drought induced 19 protein (Di19), zinc-binding)
A0A3Q0IWA2	Protein FAM210A isoform X2	LOC103510763		tr|A0A3Q0IWA2|A0A3Q0IWA2_DIACI;tr|A0A1S3D3T5|A0A1S3D3T5_DIACI	tr|A0A3Q0IWA2|A0A3Q0IWA2_DIACI Protein FAM210A isoform X2 OS=Diaphorina citri OX=121845 GN=LOC103510763 PE=4 SV=1;tr|A0A1S3D3T5|A0A1S3D3T5_DIACI Uncharacterized protein C18orf19 homolog A isoform X1 OS=Diaphorina citri OX=121845 GN=LOC103510763 PE=4 SV=1	2	2	2	2	13.9	27.621	8541.9	11395	56026		13668		Quantified	GO:0016021(CC:integral component of membrane)				PF06916(Protein of unknown function (DUF1279))
A0A1S3D3U1	Peroxidase-like	LOC103510881		tr|A0A1S3D3U1|A0A1S3D3U1_DIACI;tr|A0A3Q0IWL8|A0A3Q0IWL8_DIACI	tr|A0A1S3D3U1|A0A1S3D3U1_DIACI Peroxidase-like OS=Diaphorina citri OX=121845 GN=LOC103510881 PE=4 SV=1	2	5	5	5	13	74.018	164860	97557	27274	481180	205370	232170	Quantified	GO:0006979(BP:response to oxidative stress);GO:0042600(CC:chorion);GO:0020037(MF:heme binding);GO:0004601(MF:peroxidase activity)				PF03098(Animal haem peroxidase)
A0A1S3D3V4	Radial spoke head protein 6 homolog A	LOC103510890		tr|A0A1S3D3V4|A0A1S3D3V4_DIACI	tr|A0A1S3D3V4|A0A1S3D3V4_DIACI Radial spoke head protein 6 homolog A OS=Diaphorina citri OX=121845 GN=LOC103510890 PE=4 SV=1	1	1	1	1	3.3	69.96			12300		6213.5	4668.8	Quantified	GO:0060271(BP:cilium assembly);GO:0060294(BP:cilium movement involved in cell motility);GO:0001534(CC:radial spoke)				PF04712(Radial spokehead-like protein)
A0A1S3D3W6	Protein scabrous-like	LOC103510814		tr|A0A1S3D3W6|A0A1S3D3W6_DIACI;tr|A0A3Q0ILC5|A0A3Q0ILC5_DIACI	tr|A0A1S3D3W6|A0A1S3D3W6_DIACI Protein scabrous-like OS=Diaphorina citri OX=121845 GN=LOC103510814 PE=4 SV=2;tr|A0A3Q0ILC5|A0A3Q0ILC5_DIACI Protein scabrous OS=Diaphorina citri OX=121845 GN=LOC103506106 PE=4 SV=1	2	1	1	1	14.7	19.1	1114300	908130			736850	562300	Quantified
A0A1S3D3X3	Obg-like ATPase 1	LOC103510054	FUNCTION: Hydrolyzes ATP, and can also hydrolyze GTP with lower efficiency. Has lower affinity for GTP. {ECO:0000256|HAMAP-Rule:MF_03167}.	tr|A0A1S3D3X3|A0A1S3D3X3_DIACI;tr|A0A1S3D2E0|A0A1S3D2E0_DIACI;tr|A0A1S3D2G1|A0A1S3D2G1_DIACI;tr|A0A1S4ECU8|A0A1S4ECU8_DIACI;tr|A0A1S3D2L6|A0A1S3D2L6_DIACI	tr|A0A1S3D3X3|A0A1S3D3X3_DIACI Obg-like ATPase 1 OS=Diaphorina citri OX=121845 GN=LOC103510054 PE=3 SV=1;tr|A0A1S3D2E0|A0A1S3D2E0_DIACI Obg-like ATPase 1 OS=Diaphorina citri OX=121845 GN=LOC103510054 PE=3 SV=1;tr|A0A1S3D2G1|A0A1S3D2G1_DIACI Obg-like ATPase	5	14	14	14	46.3	48.501	1373300	1397700	1126300	2174700	1352200	1574500	Quantified	GO:0005737(CC:cytoplasm);GO:0005524(MF:ATP binding);GO:0016887(MF:ATPase activity);GO:0005525(MF:GTP binding);GO:0043023(MF:ribosomal large subunit binding);GO:0043022(MF:ribosome binding)			Cytoplasm	PF01926(50S ribosome-binding GTPase);PF06071(Protein of unknown function (DUF933))
A0A3Q0IUB4	Uncharacterized protein LOC113466771	LOC113466771		tr|A0A3Q0IUB4|A0A3Q0IUB4_DIACI;tr|A0A1S3D3X8|A0A1S3D3X8_DIACI	tr|A0A3Q0IUB4|A0A3Q0IUB4_DIACI Uncharacterized protein LOC113466771 OS=Diaphorina citri OX=121845 GN=LOC113466771 PE=4 SV=1;tr|A0A1S3D3X8|A0A1S3D3X8_DIACI CKLF-like MARVEL transmembrane domain-containing protein 8 OS=Diaphorina citri OX=121845 GN=LOC103510	2	1	1	1	16.2	12.113	450350	489280	493020	655180	469810	412060	Quantified	GO:0016021(CC:integral component of membrane)
A0A1S3D3Y4	LOW QUALITY PROTEIN: complement component 1 Q subcomponent-binding protein, mitochondrial	LOC103510846		tr|A0A1S3D3Y4|A0A1S3D3Y4_DIACI	tr|A0A1S3D3Y4|A0A1S3D3Y4_DIACI LOW QUALITY PROTEIN: complement component 1 Q subcomponent-binding protein, mitochondrial OS=Diaphorina citri OX=121845 GN=LOC103510846 PE=3 SV=1	1	8	8	8	42.8	28.858	3587700	2600900	1961000	5232300	2862600	2962700	Quantified	GO:0005759(CC:mitochondrial matrix)				PF02330(Mitochondrial glycoprotein)
A0A1S3D3Z5	V-type proton ATPase 21 kDa proteolipid subunit	LOC103510957		tr|A0A1S3D3Z5|A0A1S3D3Z5_DIACI	tr|A0A1S3D3Z5|A0A1S3D3Z5_DIACI V-type proton ATPase 21 kDa proteolipid subunit OS=Diaphorina citri OX=121845 GN=LOC103510957 PE=3 SV=1	1	1	1	1	16.4	21.331		14193					Identified	GO:0016021(CC:integral component of membrane);GO:0033179(CC:proton-transporting V-type ATPase, V0 domain);GO:0015078(MF:proton transmembrane transporter activity)			Membrane;Multi-pass membrane protein	PF00137(ATP synthase subunit C)
A0A1S3D419	Nucleoporin Nup43-like	LOC103510990		tr|A0A1S3D419|A0A1S3D419_DIACI	tr|A0A1S3D419|A0A1S3D419_DIACI Nucleoporin Nup43-like OS=Diaphorina citri OX=121845 GN=LOC103510990 PE=4 SV=1	1	1	1	1	4.4	30.234	178950	146180	122440	26940	159180	137700	Quantified
A0A1S3D420	Lamin Dm0	LOC103510146		tr|A0A1S3D420|A0A1S3D420_DIACI;tr|A0A1S3DSJ0|A0A1S3DSJ0_DIACI;tr|A0A1S3DT80|A0A1S3DT80_DIACI	tr|A0A1S3D420|A0A1S3D420_DIACI Lamin Dm0 OS=Diaphorina citri OX=121845 GN=LOC103510146 PE=4 SV=1	3	17	17	17	41.4	48.429	3643500	2954000	2603900	3928600	2502700	2528200	Quantified	GO:0005882(CC:intermediate filament)				PF00038(Intermediate filament protein)
A0A1S3D421	Bis(5-nucleosyl)-tetraphosphatase [asymmetrical]	LOC103511012		tr|A0A1S3D421|A0A1S3D421_DIACI;tr|A0A1S4EDN0|A0A1S4EDN0_DIACI	tr|A0A1S3D421|A0A1S3D421_DIACI Bis(5-nucleosyl)-tetraphosphatase [asymmetrical] OS=Diaphorina citri OX=121845 GN=LOC103511012 PE=3 SV=1;tr|A0A1S4EDN0|A0A1S4EDN0_DIACI Bis(5-nucleosyl)-tetraphosphatase [asymmetrical] OS=Diaphorina citri OX=121845 GN=LOC10	2	2	2	2	15.1	19.249	100510	82365	54780	148410	97183	97581	Quantified	GO:0008796(MF:bis(5'-nucleosyl)-tetraphosphatase activity)				PF00293(NUDIX domain)
A0A1S3D426	Calmodulin-A-like	LOC103511026	FUNCTION: May be involved in calcium-mediated signal transduction. {ECO:0000256|RuleBase:RU367017}.	tr|A0A1S3D426|A0A1S3D426_DIACI	tr|A0A1S3D426|A0A1S3D426_DIACI Calmodulin-A-like OS=Diaphorina citri OX=121845 GN=LOC103511026 PE=4 SV=1	1	1	1	1	15.6	17.125		178380		572100	371010	534800	Quantified	GO:0019722(BP:calcium-mediated signaling);GO:0005509(MF:calcium ion binding)				PF13499(EF-hand domain pair);PF14658(EF-hand domain)
A0A1S3D442	Mitochondrial import inner membrane translocase subunit	LOC103511040	FUNCTION: Mitochondrial intermembrane chaperone that participates in the import and insertion of some multi-pass transmembrane proteins into the mitochondrial inner membrane. Also required for the transfer of beta-barrel precursors from the TOM complex to the sorting and assembly machinery (SAM complex) of the outer membrane. Acts as a chaperone-like protein that protects the hydrophobic precurso…	tr|A0A1S3D442|A0A1S3D442_DIACI	tr|A0A1S3D442|A0A1S3D442_DIACI Mitochondrial import inner membrane translocase subunit OS=Diaphorina citri OX=121845 GN=LOC103511040 PE=3 SV=1	1	3	3	3	37.9	11.444	289610	548830	409530	277120	295720	282350	Quantified	GO:0072321(BP:chaperone-mediated protein transport);GO:0005758(CC:mitochondrial intermembrane space);GO:0046872(MF:metal ion binding)			Mitochondrion inner membrane;Peripheral membrane protein;Intermembrane side	PF02953(Tim10/DDP family zinc finger)
A0A1S3D462	Large ribosomal subunit protein uL29	LOC103510951		tr|A0A1S3D462|A0A1S3D462_DIACI	tr|A0A1S3D462|A0A1S3D462_DIACI Large ribosomal subunit protein uL29 OS=Diaphorina citri OX=121845 GN=LOC103510951 PE=3 SV=1	1	3	3	3	16.8	14.932	111010	189200	116890	225410	168810	245430	Quantified	GO:0006412(BP:translation);GO:0005840(CC:ribosome);GO:0003735(MF:structural constituent of ribosome)				PF00831(Ribosomal L29 protein)
A0A1S3D469	F-actin-capping protein subunit alpha	LOC103511100	FUNCTION: F-actin-capping proteins bind in a Ca(2+)-independent manner to the fast growing ends of actin filaments (barbed end) thereby blocking the exchange of subunits at these ends. Unlike other capping proteins (such as gelsolin and severin), these proteins do not sever actin filaments. {ECO:0000256|RuleBase:RU365077, ECO:0000256|SAAS:SAAS01187389}.	tr|A0A1S3D469|A0A1S3D469_DIACI	tr|A0A1S3D469|A0A1S3D469_DIACI F-actin-capping protein subunit alpha OS=Diaphorina citri OX=121845 GN=LOC103511100 PE=3 SV=1	1	9	9	9	57.5	32.438	1054100	982240	858230	1520000	1003600	1001000	Quantified	GO:0051016(BP:barbed-end actin filament capping);GO:0008290(CC:F-actin capping protein complex);GO:0003779(MF:actin binding)				PF01267(F-actin capping protein alpha subunit)
A0A1S3D5S1	Tetra-peptide repeat homeobox protein 1-like isoform X3	LOC103511135		tr|A0A1S3D5S1|A0A1S3D5S1_DIACI;tr|A0A1S3D499|A0A1S3D499_DIACI;tr|A0A3Q0J6E0|A0A3Q0J6E0_DIACI;tr|A0A3Q0JKU1|A0A3Q0JKU1_DIACI;tr|A0A1S4ES07|A0A1S4ES07_DIACI	tr|A0A1S3D5S1|A0A1S3D5S1_DIACI Tetra-peptide repeat homeobox protein 1-like isoform X3 OS=Diaphorina citri OX=121845 GN=LOC103511135 PE=4 SV=1;tr|A0A1S3D499|A0A1S3D499_DIACI Cuticle protein 64-like isoform X1 OS=Diaphorina citri OX=121845 GN=LOC103511135 P	5	8	4	4	36.4	27.337	1281200	1032900	816920	455020	321410	294360	Quantified	GO:0003677(MF:DNA binding)
A0A1S3D4B4	RNA-binding protein 33 isoform X2	LOC103511154		tr|A0A1S3D4B4|A0A1S3D4B4_DIACI;tr|A0A1S3D497|A0A1S3D497_DIACI	tr|A0A1S3D4B4|A0A1S3D4B4_DIACI RNA-binding protein 33 isoform X2 OS=Diaphorina citri OX=121845 GN=LOC103511154 PE=4 SV=1;tr|A0A1S3D497|A0A1S3D497_DIACI Splicing factor 3B subunit 2 isoform X1 OS=Diaphorina citri OX=121845 GN=LOC103511154 PE=4 SV=1	2	2	2	2	6.1	58.089	232660	129820	108750	212030	142030	170980	Quantified
A0A1S4ED76	Sorting nexin	LOC103510348	FUNCTION: Involved in several stages of intracellular trafficking. {ECO:0000256|PIRNR:PIRNR036924}.	tr|A0A1S4ED76|A0A1S4ED76_DIACI;tr|A0A1S3D4C7|A0A1S3D4C7_DIACI	tr|A0A1S4ED76|A0A1S4ED76_DIACI Sorting nexin OS=Diaphorina citri OX=121845 GN=LOC103510348 PE=3 SV=1;tr|A0A1S3D4C7|A0A1S3D4C7_DIACI Sorting nexin OS=Diaphorina citri OX=121845 GN=LOC103510348 PE=3 SV=1	2	8	8	8	32.5	48.005	244010	290120	273630	356780	366910	351310	Quantified	GO:0015031(BP:protein transport);GO:0035091(MF:phosphatidylinositol binding)				PF00787(PX domain);PF09325(Vps5 C terminal like)
A0A1S3D4D5	Uncharacterized protein LOC103511229	LOC103511229		tr|A0A1S3D4D5|A0A1S3D4D5_DIACI	tr|A0A1S3D4D5|A0A1S3D4D5_DIACI Uncharacterized protein LOC103511229 OS=Diaphorina citri OX=121845 GN=LOC103511229 PE=4 SV=1	1	1	1	1	9.2	14.447	131560	132730	176070	241700	150990		Quantified
A0A1S3D4D9	Plexin A3-like isoform X1	LOC103511236		tr|A0A1S3D4D9|A0A1S3D4D9_DIACI	tr|A0A1S3D4D9|A0A1S3D4D9_DIACI Plexin A3-like isoform X1 OS=Diaphorina citri OX=121845 GN=LOC103511236 PE=4 SV=1	1	4	3	3	15.2	36.183	20868	101110	6114	10100	41111	110860	Quantified	GO:0016021(CC:integral component of membrane);GO:0017154(MF:semaphorin receptor activity)				PF01437(Plexin repeat)
A0A1S3D4E2	Uncharacterized protein C6orf136 homolog	LOC103510370		tr|A0A1S3D4E2|A0A1S3D4E2_DIACI	tr|A0A1S3D4E2|A0A1S3D4E2_DIACI Uncharacterized protein C6orf136 homolog OS=Diaphorina citri OX=121845 GN=LOC103510370 PE=4 SV=1	1	2	2	2	14.2	18.728	66716						Identified					PF10184(Uncharacterized conserved protein (DUF2358))
A0A1S3D4F7	Cathepsin F-like	LOC103511254		tr|A0A1S3D4F7|A0A1S3D4F7_DIACI	tr|A0A1S3D4F7|A0A1S3D4F7_DIACI Cathepsin F-like OS=Diaphorina citri OX=121845 GN=LOC103511254 PE=3 SV=1	1	8	3	3	49.1	24.475	58438	533270	113120	242150	1050100	1159000	Quantified	GO:0008234(MF:cysteine-type peptidase activity)				PF00112(Papain family cysteine protease)
A0A1S3D4I7	Calcium uniporter protein	LOC103511309	FUNCTION: Mitochondrial inner membrane calcium uniporter that mediates calcium uptake into mitochondria. Constitutes a pore-forming and calcium-conducting subunit. Mitochondrial calcium homeostasis plays key roles in cellular physiology and regulates cell bioenergetics, cytoplasmic calcium signals and activation of cell death pathways. {ECO:0000256|RuleBase:RU367035}.	tr|A0A1S3D4I7|A0A1S3D4I7_DIACI	tr|A0A1S3D4I7|A0A1S3D4I7_DIACI Calcium uniporter protein OS=Diaphorina citri OX=121845 GN=LOC103511309 PE=3 SV=1	1	4	4	4	19.1	44.494	109230	165590	134380	161340	184940	124700	Quantified	GO:0051560(BP:mitochondrial calcium ion homeostasis);GO:0016021(CC:integral component of membrane);GO:0005739(CC:mitochondrion)			Membrane;Multi-pass membrane protein;Mitochondrion inner membrane	PF04678(Mitochondrial calcium uniporter)
A0A1S3D4J6	Extracellular serine/threonine protein CG31145	LOC103511332		tr|A0A1S3D4J6|A0A1S3D4J6_DIACI	tr|A0A1S3D4J6|A0A1S3D4J6_DIACI Extracellular serine/threonine protein CG31145 OS=Diaphorina citri OX=121845 GN=LOC103511332 PE=3 SV=1	1	3	3	3	7.2	67.107	44210	47538	25901	129580	12557	122930	Quantified	GO:0016021(CC:integral component of membrane)				PF06702(Golgi casein kinase, C-terminal, Fam20)
A0A1S3D4K4	Acyl-coenzyme A thioesterase 9, mitochondrial-like	LOC103510447		tr|A0A1S3D4K4|A0A1S3D4K4_DIACI;tr|A0A3Q0IVJ9|A0A3Q0IVJ9_DIACI	tr|A0A1S3D4K4|A0A1S3D4K4_DIACI Acyl-coenzyme A thioesterase 9, mitochondrial-like OS=Diaphorina citri OX=121845 GN=LOC103510447 PE=4 SV=1	2	6	6	6	23.2	51.053	35930	140170	101930	80940	207290	61378	Quantified
A0A1S3D4L1	Multiple coagulation factor deficiency protein 2 homolog	LOC103511356		tr|A0A1S3D4L1|A0A1S3D4L1_DIACI	tr|A0A1S3D4L1|A0A1S3D4L1_DIACI Multiple coagulation factor deficiency protein 2 homolog OS=Diaphorina citri OX=121845 GN=LOC103511356 PE=4 SV=1	1	5	5	5	41	22.313	431200	391490	300940	293010	296780	356910	Quantified	GO:0005509(MF:calcium ion binding)				PF13499(EF-hand domain pair)
A0A1S3D4M5	c-Myc-binding protein homolog	LOC103511242		tr|A0A1S3D4M5|A0A1S3D4M5_DIACI	tr|A0A1S3D4M5|A0A1S3D4M5_DIACI c-Myc-binding protein homolog OS=Diaphorina citri OX=121845 GN=LOC103511242 PE=3 SV=1	1	3	3	3	32.7	16.527	1221500	964240	1390300	535910	791870	767780	Quantified	GO:0006355(BP:regulation of transcription, DNA-templated);GO:0003713(MF:transcription coactivator activity)			Nucleus
A0A1S3D4N2	Signal peptidase complex subunit 2	LOC103511381		tr|A0A1S3D4N2|A0A1S3D4N2_DIACI	tr|A0A1S3D4N2|A0A1S3D4N2_DIACI Signal peptidase complex subunit 2 OS=Diaphorina citri OX=121845 GN=LOC103511381 PE=3 SV=1	1	3	3	3	23.4	21.603	52150	67884	182580	35562	142770	104770	Quantified	GO:0006465(BP:signal peptide processing);GO:0016021(CC:integral component of membrane);GO:0005787(CC:signal peptidase complex);GO:0008233(MF:peptidase activity)			Endoplasmic reticulum membrane;Multi-pass membrane protein;Membrane	PF06703(Microsomal signal peptidase 25 kDa subunit (SPC25))
A0A1S3D4Q3	Tetratricopeptide repeat protein 19 homolog, mitochondrial	LOC103511402		tr|A0A1S3D4Q3|A0A1S3D4Q3_DIACI	tr|A0A1S3D4Q3|A0A1S3D4Q3_DIACI Tetratricopeptide repeat protein 19 homolog, mitochondrial OS=Diaphorina citri OX=121845 GN=LOC103511402 PE=3 SV=1	1	2	2	2	12.6	32.295	16374	48497	60655	8991.9	32174	50770	Quantified	GO:0034551(BP:mitochondrial respiratory chain complex III assembly);GO:0005739(CC:mitochondrion)				PF13424(Tetratricopeptide repeat)
A0A1S3D4R1	ATP synthase subunit delta, mitochondrial isoform X1	LOC103511460		tr|A0A1S3D4R1|A0A1S3D4R1_DIACI	tr|A0A1S3D4R1|A0A1S3D4R1_DIACI ATP synthase subunit delta, mitochondrial isoform X1 OS=Diaphorina citri OX=121845 GN=LOC103511460 PE=3 SV=2	1	5	1	1	54.4	21.656	252890	105070		125480	213980		Quantified	GO:0015986(BP:ATP synthesis coupled proton transport);GO:0045261(CC:proton-transporting ATP synthase complex, catalytic core F(1));GO:0046933(MF:proton-transporting ATP synthase activity, rotational mechanism)	K02114(NA)	ko00190(Oxidative phosphorylation);ko00195(Photosynthesis)		PF02823(ATP synthase, Delta/Epsilon chain, beta-sandwich domain)
A0A1S3D4U3	Uncharacterized protein LOC103511519	LOC103511519		tr|A0A1S3D4U3|A0A1S3D4U3_DIACI	tr|A0A1S3D4U3|A0A1S3D4U3_DIACI Uncharacterized protein LOC103511519 OS=Diaphorina citri OX=121845 GN=LOC103511519 PE=4 SV=2	1	7	4	4	14.3	67.85	1928500	1898700	1463400	3374800	2314600	2223800	Quantified					PF01161(Phosphatidylethanolamine-binding protein)
A0A1S3D4V5	28S ribosomal protein S28, mitochondrial	LOC103511528		tr|A0A1S3D4V5|A0A1S3D4V5_DIACI	tr|A0A1S3D4V5|A0A1S3D4V5_DIACI 28S ribosomal protein S28, mitochondrial OS=Diaphorina citri OX=121845 GN=LOC103511528 PE=4 SV=2	1	2	2	2	19.2	18.859	39380	63597	29210	36773	36701	38854	Quantified	GO:0005840(CC:ribosome)				PF10246(Mitochondrial ribosomal protein MRP-S35)
A0A1S3D4V7	non-specific serine/threonine protein kinase	LOC103511543		tr|A0A1S3D4V7|A0A1S3D4V7_DIACI;tr|A0A3Q0J2A7|A0A3Q0J2A7_DIACI;tr|A0A3Q0IXZ6|A0A3Q0IXZ6_DIACI	tr|A0A1S3D4V7|A0A1S3D4V7_DIACI non-specific serine/threonine protein kinase OS=Diaphorina citri OX=121845 GN=LOC103511543 PE=4 SV=1;tr|A0A3Q0J2A7|A0A3Q0J2A7_DIACI non-specific serine/threonine protein kinase OS=Diaphorina citri OX=121845 GN=LOC103511543 PE	3	8	8	8	25.7	54.717	113170	256460	322740	560430	153920	434090	Quantified	GO:0035556(BP:intracellular signal transduction);GO:0005524(MF:ATP binding);GO:0004674(MF:protein serine/threonine kinase activity)				PF12202(Oxidative-stress-responsive kinase 1 C-terminal domain);PF00069(Protein kinase domain)
A0A1S3D4W3	Cytosolic Fe-S cluster assembly factor NUBP1 homolog	LOC103511548	FUNCTION: Component of the cytosolic iron-sulfur (Fe/S) protein assembly (CIA) machinery. Required for maturation of extramitochondrial Fe-S proteins. The NUBP1-NUBP2 heterotetramer forms a Fe-S scaffold complex, mediating the de novo assembly of an Fe-S cluster and its transfer to target apoproteins. {ECO:0000256|HAMAP-Rule:MF_03038}.	tr|A0A1S3D4W3|A0A1S3D4W3_DIACI	tr|A0A1S3D4W3|A0A1S3D4W3_DIACI Cytosolic Fe-S cluster assembly factor NUBP1 homolog OS=Diaphorina citri OX=121845 GN=LOC103511548 PE=3 SV=1	1	2	2	2	14.5	33.129	26018	48733	42701		39013	45679	Quantified	GO:0016226(BP:iron-sulfur cluster assembly);GO:0005737(CC:cytoplasm);GO:0051539(MF:4 iron, 4 sulfur cluster binding);GO:0005524(MF:ATP binding);GO:0046872(MF:metal ion binding)			Cytoplasm	PF10609(NUBPL iron-transfer P-loop NTPase)
A0A1S3D4X6	DnaJ protein homolog 1	LOC103510628		tr|A0A1S3D4X6|A0A1S3D4X6_DIACI	tr|A0A1S3D4X6|A0A1S3D4X6_DIACI DnaJ protein homolog 1 OS=Diaphorina citri OX=121845 GN=LOC103510628 PE=4 SV=1	1	7	7	7	25.6	38.892	733560	557640	447740	756240	505750	564760	Quantified	GO:0006457(BP:protein folding);GO:0051082(MF:unfolded protein binding)				PF00226(DnaJ domain);PF01556(DnaJ C terminal domain)
A0A1S3D4Y1	Uncharacterized protein LOC103511425 isoform X2	LOC103511425		tr|A0A1S3D4Y1|A0A1S3D4Y1_DIACI;tr|A0A3Q0IXL8|A0A3Q0IXL8_DIACI	tr|A0A1S3D4Y1|A0A1S3D4Y1_DIACI Uncharacterized protein LOC103511425 isoform X2 OS=Diaphorina citri OX=121845 GN=LOC103511425 PE=4 SV=1;tr|A0A3Q0IXL8|A0A3Q0IXL8_DIACI Uncharacterized protein LOC103511425 isoform X1 OS=Diaphorina citri OX=121845 GN=LOC103511	2	2	2	2	5.5	58.701	88861	9232.2	13045	328250	74699	155980	Quantified
A0A1S3D4Y8	Protein mago nashi homolog isoform X1	LOC103511593		tr|A0A1S3D4Y8|A0A1S3D4Y8_DIACI	tr|A0A1S3D4Y8|A0A1S3D4Y8_DIACI Protein mago nashi homolog isoform X1 OS=Diaphorina citri OX=121845 GN=LOC103511593 PE=3 SV=1	1	1	1	1	10.1	17.44	51468	52504	50174	106300	63968	76405	Quantified	GO:0008380(BP:RNA splicing);GO:0035145(CC:exon-exon junction complex)			Nucleus	PF02792(Mago nashi protein)
A0A1S3D4Z0	Protein Mo25	LOC103511589		tr|A0A1S3D4Z0|A0A1S3D4Z0_DIACI	tr|A0A1S3D4Z0|A0A1S3D4Z0_DIACI Protein Mo25 OS=Diaphorina citri OX=121845 GN=LOC103511589 PE=3 SV=1	1	1	1	1	6.8	17.75	76590	71643	73807	112670	102080	100160	Quantified					PF08569(Mo25-like)
A0A1S3D504	DNA-directed RNA polymerases I, II, and III subunit RPABC3	LOC103510689	FUNCTION: DNA-dependent RNA polymerase catalyzes the transcription of DNA into RNA using the four ribonucleoside triphosphates as substrates. Common component of RNA polymerases I, II and III which synthesize ribosomal RNA precursors, mRNA precursors and many functional non-coding RNAs, and small RNAs, such as 5S rRNA and tRNAs, respectively. {ECO:0000256|PIRNR:PIRNR000779}.	tr|A0A1S3D504|A0A1S3D504_DIACI	tr|A0A1S3D504|A0A1S3D504_DIACI DNA-directed RNA polymerases I, II, and III subunit RPABC3 OS=Diaphorina citri OX=121845 GN=LOC103510689 PE=3 SV=1	1	1	1	1	8	17.224	22808	9454.6	19255	36338	28263	30544	Quantified	GO:0006366(BP:transcription by RNA polymerase II);GO:0006383(BP:transcription by RNA polymerase III);GO:0005736(CC:RNA polymerase I complex);GO:0005665(CC:RNA polymerase II, core complex);GO:0005666(CC:RNA polymerase III complex);GO:0003899(MF:DNA-directed 5'-3' RNA polymerase activity)				PF03870(RNA polymerase Rpb8)
A0A1S3D517	Ectopic P granules protein 3-like	LOC103511621		tr|A0A1S3D517|A0A1S3D517_DIACI	tr|A0A1S3D517|A0A1S3D517_DIACI Ectopic P granules protein 3-like OS=Diaphorina citri OX=121845 GN=LOC103511621 PE=4 SV=1	1	1	1	1	4.3	51.713	32208	24384	33935	59790	28871	38565	Quantified	GO:0016021(CC:integral component of membrane)				PF02037(SAP domain)
A0A1S3D528	Uncharacterized protein LOC103511652	LOC103511652		tr|A0A1S3D528|A0A1S3D528_DIACI	tr|A0A1S3D528|A0A1S3D528_DIACI Uncharacterized protein LOC103511652 OS=Diaphorina citri OX=121845 GN=LOC103511652 PE=4 SV=1	1	4	4	4	41.7	16.17	220650	106910	195370	892790	225650	274260	Quantified	GO:0051287(MF:NAD binding);GO:0016616(MF:oxidoreductase activity, acting on the CH-OH group of donors, NAD or NADP as acceptor)				PF00389(D-isomer specific 2-hydroxyacid dehydrogenase, catalytic domain)
A0A1S3D536	HD domain-containing protein 2	LOC103511647		tr|A0A1S3D536|A0A1S3D536_DIACI	tr|A0A1S3D536|A0A1S3D536_DIACI HD domain-containing protein 2 OS=Diaphorina citri OX=121845 GN=LOC103511647 PE=4 SV=1	1	5	5	5	44.4	18.863	539720	462390	330970	591270	441650	459200	Quantified	GO:0002953(MF:5'-deoxynucleotidase activity)				PF13023(HD domain)
A0A1S3D544	Inositol-1-monophosphatase	LOC103511680		tr|A0A1S3D544|A0A1S3D544_DIACI	tr|A0A1S3D544|A0A1S3D544_DIACI Inositol-1-monophosphatase OS=Diaphorina citri OX=121845 GN=LOC103511680 PE=3 SV=1	1	1	1	1	13.6	26.336	10495		4937.7	140310		52175	Quantified	GO:0006021(BP:inositol biosynthetic process);GO:0046855(BP:inositol phosphate dephosphorylation);GO:0046854(BP:phosphatidylinositol phosphorylation);GO:0008934(MF:inositol monophosphate 1-phosphatase activity);GO:0052832(MF:inositol monophosphate 3-phosphatase activity);GO:0052833(MF:inositol monophosphate 4-phosphatase activity);GO:0046872(MF:metal ion binding)	K01092(NA)	ko00521(Streptomycin biosynthesis);ko00562(Inositol phosphate metabolism);ko04070(Phosphatidylinositol signaling system)		PF00078(Reverse transcriptase (RNA-dependent DNA polymerase));PF00459(Inositol monophosphatase family)
A0A3Q0IY66	Keratin, type II cytoskeletal 2 epidermal-like isoform X4	LOC103511685		tr|A0A3Q0IY66|A0A3Q0IY66_DIACI;tr|A0A1S4EE95|A0A1S4EE95_DIACI;tr|A0A1S3D6M8|A0A1S3D6M8_DIACI;tr|A0A1S3D545|A0A1S3D545_DIACI	tr|A0A3Q0IY66|A0A3Q0IY66_DIACI Keratin, type II cytoskeletal 2 epidermal-like isoform X4 OS=Diaphorina citri OX=121845 GN=LOC103511685 PE=4 SV=1;tr|A0A1S4EE95|A0A1S4EE95_DIACI Glycine-rich protein 2-like isoform X3 OS=Diaphorina citri OX=121845 GN=LOC10351	4	1	1	1	20.3	12.353	10422	36384	10756	5756.9	3655.4	5973.2	Quantified
A0A1S3D546	Uncharacterized protein LOC103511661 isoform X1	LOC103511661		tr|A0A1S3D546|A0A1S3D546_DIACI;tr|A0A1S3D6L8|A0A1S3D6L8_DIACI	tr|A0A1S3D546|A0A1S3D546_DIACI Uncharacterized protein LOC103511661 isoform X1 OS=Diaphorina citri OX=121845 GN=LOC103511661 PE=3 SV=1;tr|A0A1S3D6L8|A0A1S3D6L8_DIACI Uncharacterized protein LOC103511661 isoform X2 OS=Diaphorina citri OX=121845 GN=LOC103511	2	6	6	6	37.4	32.317	218330	328800	371620	428960	386400	367860	Quantified	GO:0019441(BP:tryptophan catabolic process to kynurenine);GO:0004061(MF:arylformamidase activity)				PF04199(Putative cyclase)
A0A1S3D554	Probable N-acetyltransferase san	LOC103511692		tr|A0A1S3D554|A0A1S3D554_DIACI	tr|A0A1S3D554|A0A1S3D554_DIACI Probable N-acetyltransferase san OS=Diaphorina citri OX=121845 GN=LOC103511692 PE=4 SV=1	1	1	1	1	9	19.349	12500	60999	42935		34967	43718	Quantified	GO:0008080(MF:N-acetyltransferase activity)				PF00583(Acetyltransferase (GNAT) family)
A0A1S3D555	S-methyl-5-thioadenosine phosphorylase	LOC103511694	FUNCTION: Catalyzes the reversible phosphorylation of S-methyl-5'-thioadenosine (MTA) to adenine and 5-methylthioribose-1-phosphate. Involved in the breakdown of MTA, a major by-product of polyamine biosynthesis. Responsible for the first step in the methionine salvage pathway after MTA has been generated from S-adenosylmethionine. Has broad substrate specificity with 6-aminopurine nucleosides as…	tr|A0A1S3D555|A0A1S3D555_DIACI;tr|A0A3Q0IYB1|A0A3Q0IYB1_DIACI	tr|A0A1S3D555|A0A1S3D555_DIACI S-methyl-5-thioadenosine phosphorylase OS=Diaphorina citri OX=121845 GN=LOC103511694 PE=3 SV=1;tr|A0A3Q0IYB1|A0A3Q0IYB1_DIACI S-methyl-5-thioadenosine phosphorylase-like OS=Diaphorina citri OX=121845 GN=LOC103511697 PE=4 SV	2	10	10	10	55.5	31.067	627370	787040	612530	577670	423010	523820	Quantified	GO:0019509(BP:L-methionine salvage from methylthioadenosine);GO:0006166(BP:purine ribonucleoside salvage);GO:0005737(CC:cytoplasm);GO:0005634(CC:nucleus);GO:0017061(MF:S-methyl-5-thioadenosine phosphorylase activity)			Cytoplasm;Nucleus	PF01048(Phosphorylase superfamily)
A0A1S3D557	3-hydroxyacyl-CoA dehydrogenase type-2	LOC103511570		tr|A0A1S3D557|A0A1S3D557_DIACI	tr|A0A1S3D557|A0A1S3D557_DIACI 3-hydroxyacyl-CoA dehydrogenase type-2 OS=Diaphorina citri OX=121845 GN=LOC103511570 PE=3 SV=1	1	12	12	12	70.1	26.972	1390700	1410200	1495400	1549500	1505100	1556700	Quantified	GO:0016491(MF:oxidoreductase activity)	K00059(NA)	ko00061(Fatty acid biosynthesis);ko00333(Prodigiosin biosynthesis);ko00780(Biotin metabolism);ko01240(Biosynthesis of cofactors)		PF00106(short chain dehydrogenase)
A0A3Q0IY71	Dedicator of cytokinesis protein 7 isoform X4	LOC103511696		tr|A0A3Q0IY71|A0A3Q0IY71_DIACI;tr|A0A1S3D559|A0A1S3D559_DIACI;tr|A0A3Q0IY64|A0A3Q0IY64_DIACI;tr|A0A1S4EEQ4|A0A1S4EEQ4_DIACI	tr|A0A3Q0IY71|A0A3Q0IY71_DIACI Dedicator of cytokinesis protein 7 isoform X4 OS=Diaphorina citri OX=121845 GN=LOC103511696 PE=3 SV=1;tr|A0A1S3D559|A0A1S3D559_DIACI Dedicator of cytokinesis protein 7 isoform X3 OS=Diaphorina citri OX=121845 GN=LOC103511696	4	2	2	2	2.2	228.45		593130	594850	58967	4598500	832700	Quantified	GO:0007264(BP:small GTPase mediated signal transduction);GO:0005085(MF:guanyl-nucleotide exchange factor activity)				PF11878(Domain of unknown function (DUF3398));PF14429(C2 domain in Dock180 and Zizimin proteins);PF06920(Dock homology region 2)
A0A1S3D565	Vegetative cell wall protein gp1-like	LOC103511704		tr|A0A1S3D565|A0A1S3D565_DIACI	tr|A0A1S3D565|A0A1S3D565_DIACI Vegetative cell wall protein gp1-like OS=Diaphorina citri OX=121845 GN=LOC103511704 PE=4 SV=1	1	2	2	2	16.9	30.926	75068	66342	63287			20192	Quantified
A0A1S3D572	Translin-associated protein X-like	LOC103511710		tr|A0A1S3D572|A0A1S3D572_DIACI;tr|A0A1S3D5F3|A0A1S3D5F3_DIACI	tr|A0A1S3D572|A0A1S3D572_DIACI Translin-associated protein X-like OS=Diaphorina citri OX=121845 GN=LOC103511710 PE=3 SV=1;tr|A0A1S3D5F3|A0A1S3D5F3_DIACI Translin-associated protein X-like OS=Diaphorina citri OX=121845 GN=LOC103511714 PE=4 SV=1	2	4	4	4	23.7	31.695	16557	43804	68115	76374	72682	65392	Quantified	GO:0043565(MF:sequence-specific DNA binding)			Nucleus	PF01997(Translin family)
A0A1S3D574	Extensin-1-like	LOC103511705		tr|A0A1S3D574|A0A1S3D574_DIACI	tr|A0A1S3D574|A0A1S3D574_DIACI Extensin-1-like OS=Diaphorina citri OX=121845 GN=LOC103511705 PE=4 SV=1	1	2	2	2	28.1	13.174	118640	214600	44101				Quantified
A0A1S3D580	Acireductone dioxygenase	LOC103511723	FUNCTION: Catalyzes the formation of formate and 2-keto-4-methylthiobutyrate (KMTB) from 1,2-dihydroxy-3-keto-5-methylthiopentene (DHK-MTPene). {ECO:0000256|HAMAP-Rule:MF_03154, ECO:0000256|SAAS:SAAS00003715}.	tr|A0A1S3D580|A0A1S3D580_DIACI	tr|A0A1S3D580|A0A1S3D580_DIACI Acireductone dioxygenase OS=Diaphorina citri OX=121845 GN=LOC103511723 PE=3 SV=1	1	6	6	6	37.8	22.423	1150400	947640	773070	1494800	979030	1096900	Quantified	GO:0019509(BP:L-methionine salvage from methylthioadenosine);GO:0005737(CC:cytoplasm);GO:0005634(CC:nucleus);GO:0010309(MF:acireductone dioxygenase [iron(II)-requiring] activity);GO:0005506(MF:iron ion binding)			Cytoplasm;Nucleus	PF03079(ARD/ARD' family)
A0A1S3D583	60S ribosomal protein L37a isoform X1	LOC103511721		tr|A0A1S3D583|A0A1S3D583_DIACI	tr|A0A1S3D583|A0A1S3D583_DIACI 60S ribosomal protein L37a isoform X1 OS=Diaphorina citri OX=121845 GN=LOC103511721 PE=3 SV=1	1	3	3	3	38	10.369	645730	642880	653220	553880	775930	1028900	Quantified	GO:0006412(BP:translation);GO:0005840(CC:ribosome);GO:0003735(MF:structural constituent of ribosome)				PF01780(Ribosomal L37ae protein family)
A0A1S3D5A0	Macrophage migration inhibitory factor homolog	LOC103511645		tr|A0A1S3D5A0|A0A1S3D5A0_DIACI	tr|A0A1S3D5A0|A0A1S3D5A0_DIACI Macrophage migration inhibitory factor homolog OS=Diaphorina citri OX=121845 GN=LOC103511645 PE=3 SV=1	1	5	5	5	69.2	12.835	989960	1256400	825000	2315400	895530	759170	Quantified					PF01187(Macrophage migration inhibitory factor (MIF))
A0A1S3D5C8	cAMP-dependent protein kinase type II regulatory subunit-like	LOC103510899		tr|A0A1S3D5C8|A0A1S3D5C8_DIACI	tr|A0A1S3D5C8|A0A1S3D5C8_DIACI cAMP-dependent protein kinase type II regulatory subunit-like OS=Diaphorina citri OX=121845 GN=LOC103510899 PE=4 SV=1	1	6	3	3	50.3	22.051	244710	204520	183330	266210	221130	227380	Quantified					PF00027(Cyclic nucleotide-binding domain)
A0A1S3D5D9	3-hydroxyisobutyrate dehydrogenase	LOC103510926		tr|A0A1S3D5D9|A0A1S3D5D9_DIACI;tr|A0A1S3D3W5|A0A1S3D3W5_DIACI	tr|A0A1S3D5D9|A0A1S3D5D9_DIACI 3-hydroxyisobutyrate dehydrogenase OS=Diaphorina citri OX=121845 GN=LOC103510926 PE=3 SV=1;tr|A0A1S3D3W5|A0A1S3D3W5_DIACI Probable 3-hydroxyisobutyrate dehydrogenase, mitochondrial OS=Diaphorina citri OX=121845 GN=LOC10351093	2	4	4	4	30.8	26.609	70637	471350	380720	524360	267030	275660	Quantified	GO:0008442(MF:3-hydroxyisobutyrate dehydrogenase activity);GO:0051287(MF:NAD binding);GO:0050661(MF:NADP binding)				PF14833(NAD-binding of NADP-dependent 3-hydroxyisobutyrate dehydrogenase);PF03446(NAD binding domain of 6-phosphogluconate dehydrogenase)
A0A1S3D5E1	Importin subunit alpha	LOC103511808		tr|A0A1S3D5E1|A0A1S3D5E1_DIACI	tr|A0A1S3D5E1|A0A1S3D5E1_DIACI Importin subunit alpha OS=Diaphorina citri OX=121845 GN=LOC103511808 PE=3 SV=1	1	12	12	12	43.6	56.854	498130	587500	568430	177300	687240	836300	Quantified	GO:0006606(BP:protein import into nucleus);GO:0005737(CC:cytoplasm);GO:0042025(CC:host cell nucleus);GO:0061608(MF:nuclear import signal receptor activity)				PF16186(Atypical Arm repeat);PF01749(Importin beta binding domain);PF00514(Armadillo/beta-catenin-like repeat)
A0A1S3D5E8	Cuticle protein 12.5-like	LOC103511709		tr|A0A1S3D5E8|A0A1S3D5E8_DIACI	tr|A0A1S3D5E8|A0A1S3D5E8_DIACI Cuticle protein 12.5-like OS=Diaphorina citri OX=121845 GN=LOC103511709 PE=4 SV=1	1	4	4	4	52.9	16.173	2252400	2050600	2194500	245320	318930	356240	Quantified
A0A1S3D5F2	Protein unzipped	LOC103511810		tr|A0A1S3D5F2|A0A1S3D5F2_DIACI	tr|A0A1S3D5F2|A0A1S3D5F2_DIACI Protein unzipped OS=Diaphorina citri OX=121845 GN=LOC103511810 PE=4 SV=1	1	5	5	5	18.8	53.068	278600	335820	267240	392610	270350	292980	Quantified					PF11901(Protein of unknown function (DUF3421))
A0A1S3D5F4	Polyadenylate-binding protein 4	LOC103511827		tr|A0A1S3D5F4|A0A1S3D5F4_DIACI;tr|A0A3Q0IYE9|A0A3Q0IYE9_DIACI	tr|A0A1S3D5F4|A0A1S3D5F4_DIACI Polyadenylate-binding protein 4 OS=Diaphorina citri OX=121845 GN=LOC103511827 PE=3 SV=1;tr|A0A3Q0IYE9|A0A3Q0IYE9_DIACI Uncharacterized protein LOC103511826 OS=Diaphorina citri OX=121845 GN=LOC103511826 PE=4 SV=1	2	7	7	7	27.7	32.786	1215900	1202100	1055300	254260	1136100	914320	Quantified	GO:0003723(MF:RNA binding)				PF00076(RNA recognition motif. (a.k.a. RRM, RBD, or RNP domain));PF00658(Poly-adenylate binding protein, unique domain)
A0A1S3D5F9	Phosphoglycerate kinase	LOC103510946		tr|A0A1S3D5F9|A0A1S3D5F9_DIACI;tr|A0A1S3D3Y6|A0A1S3D3Y6_DIACI	tr|A0A1S3D5F9|A0A1S3D5F9_DIACI Phosphoglycerate kinase OS=Diaphorina citri OX=121845 GN=LOC103510946 PE=3 SV=1;tr|A0A1S3D3Y6|A0A1S3D3Y6_DIACI Phosphoglycerate kinase OS=Diaphorina citri OX=121845 GN=LOC103510946 PE=3 SV=1	2	28	28	28	75.2	44.789	29561000	26916000	26751000	45770000	36475000	35136000	Quantified	GO:0006096(BP:glycolytic process);GO:0005524(MF:ATP binding);GO:0004618(MF:phosphoglycerate kinase activity)	K00927(NA)	ko00010(Glycolysis / Gluconeogenesis);ko00710(Carbon fixation in photosynthetic organisms);ko04066(HIF-1 signaling pathway)		PF00162(Phosphoglycerate kinase)
A0A1S3D5H8	Protein maelstrom homolog	LOC103511877		tr|A0A1S3D5H8|A0A1S3D5H8_DIACI	tr|A0A1S3D5H8|A0A1S3D5H8_DIACI Protein maelstrom homolog OS=Diaphorina citri OX=121845 GN=LOC103511877 PE=3 SV=1	1	5	5	5	22.6	49.817	41086	284530	171440	234290	245470	229220	Quantified	GO:0060964(BP:regulation of gene silencing by miRNA)			Nucleus	PF13017(piRNA pathway germ-plasm component)
A0A1S3D5I2	Ras-related protein Rab-11A	LOC103511752		tr|A0A1S3D5I2|A0A1S3D5I2_DIACI	tr|A0A1S3D5I2|A0A1S3D5I2_DIACI Ras-related protein Rab-11A OS=Diaphorina citri OX=121845 GN=LOC103511752 PE=4 SV=1	1	4	4	4	21.9	25.363	524730	484890	510420	707120	888410	608100	Quantified	GO:0005525(MF:GTP binding);GO:0003924(MF:GTPase activity)				PF00071(Ras family)
A0A1S3D5I9	Eukaryotic translation initiation factor 3 subunit D	LOC103511871	FUNCTION: mRNA cap-binding component of the eukaryotic translation initiation factor 3 (eIF-3) complex, which is involved in protein synthesis of a specialized repertoire of mRNAs and, together with other initiation factors, stimulates binding of mRNA and methionyl-tRNAi to the 40S ribosome. The eIF-3 complex specifically targets and initiates translation of a subset of mRNAs involved in cell pro…	tr|A0A1S3D5I9|A0A1S3D5I9_DIACI;tr|A0A1S3DSW4|A0A1S3DSW4_DIACI	tr|A0A1S3D5I9|A0A1S3D5I9_DIACI Eukaryotic translation initiation factor 3 subunit D OS=Diaphorina citri OX=121845 GN=LOC103511871 PE=3 SV=1;tr|A0A1S3DSW4|A0A1S3DSW4_DIACI Eukaryotic translation initiation factor 3 subunit p66 OS=Diaphorina citri OX=121845	2	10	10	10	36.1	62.895	580710	618980	673700	909390	734980	839150	Quantified	GO:0002191(BP:cap-dependent translational initiation);GO:0001732(BP:formation of cytoplasmic translation initiation complex);GO:0016282(CC:eukaryotic 43S preinitiation complex);GO:0033290(CC:eukaryotic 48S preinitiation complex);GO:0005852(CC:eukaryotic translation initiation factor 3 complex);GO:0098808(MF:mRNA cap binding);GO:0003743(MF:translation initiation factor activity)			Cytoplasm	PF05091(Eukaryotic translation initiation factor 3 subunit 7 (eIF-3))
A0A1S3D5J2	Uncharacterized protein LOC103511903	LOC103511903		tr|A0A1S3D5J2|A0A1S3D5J2_DIACI	tr|A0A1S3D5J2|A0A1S3D5J2_DIACI Uncharacterized protein LOC103511903 OS=Diaphorina citri OX=121845 GN=LOC103511903 PE=4 SV=2	1	1	1	1	6.6	21.032	9175	41964		2477.5	13112	4811.9	Quantified
A0A1S3D5M2	Thiosulfate sulfurtransferase, mitochondrial isoform X3	LOC103511921		tr|A0A1S3D5M2|A0A1S3D5M2_DIACI;tr|A0A1S4EF84|A0A1S4EF84_DIACI;tr|A0A1S3D5K2|A0A1S3D5K2_DIACI	tr|A0A1S3D5M2|A0A1S3D5M2_DIACI Thiosulfate sulfurtransferase, mitochondrial isoform X3 OS=Diaphorina citri OX=121845 GN=LOC103511921 PE=4 SV=1;tr|A0A1S4EF84|A0A1S4EF84_DIACI Thiosulfate sulfurtransferase, mitochondrial isoform X2 OS=Diaphorina citri OX=121	3	1	1	1	26.7	15.099	119050	15253	72410	105750	96120	105070	Quantified	GO:0016740(MF:transferase activity)				PF00581(Rhodanese-like domain)
A0A1S3D5S2	Venom acid phosphatase Acph-1 isoform X1	LOC103511891		tr|A0A1S3D5S2|A0A1S3D5S2_DIACI;tr|A0A1S3D5K3|A0A1S3D5K3_DIACI;tr|Q0PWU9|Q0PWU9_DIACI	tr|A0A1S3D5S2|A0A1S3D5S2_DIACI Venom acid phosphatase Acph-1 isoform X1 OS=Diaphorina citri OX=121845 GN=LOC103511891 PE=4 SV=1;tr|A0A1S3D5K3|A0A1S3D5K3_DIACI Venom acid phosphatase Acph-1 isoform X2 OS=Diaphorina citri OX=121845 GN=LOC103511891 PE=4 SV=1;	3	17	17	17	53.9	48.162	19257000	17620000	19877000	23392000	20667000	19134000	Quantified	GO:0016021(CC:integral component of membrane);GO:0003993(MF:acid phosphatase activity)				PF00328(Histidine phosphatase superfamily (branch 2))
A0A1S3D5K6	Uncharacterized protein LOC103511015	LOC103511015		tr|A0A1S3D5K6|A0A1S3D5K6_DIACI;tr|A0A7T3R140|A0A7T3R140_DIACI;tr|A0A1S3DBF3|A0A1S3DBF3_DIACI	tr|A0A1S3D5K6|A0A1S3D5K6_DIACI Uncharacterized protein LOC103511015 OS=Diaphorina citri OX=121845 GN=LOC103511015 PE=4 SV=2;tr|A0A7T3R140|A0A7T3R140_DIACI Chemosensory protein 3 OS=Diaphorina citri OX=121845 GN=CSP3 PE=2 SV=1;tr|A0A1S3DBF3|A0A1S3DBF3_DIACI	3	3	3	3	9.5	54.005	144140	186610	227840	255650	260680	223070	Quantified					PF03392(Insect pheromone-binding family, A10/OS-D)
A0A1S3D5L1	Trehalase	LOC103511933		tr|A0A1S3D5L1|A0A1S3D5L1_DIACI;tr|A0A1S3D5U6|A0A1S3D5U6_DIACI;tr|A0A1S3D5M3|A0A1S3D5M3_DIACI;tr|A0A1S3D5V1|A0A1S3D5V1_DIACI	tr|A0A1S3D5L1|A0A1S3D5L1_DIACI Trehalase OS=Diaphorina citri OX=121845 GN=LOC103511933 PE=3 SV=1;tr|A0A1S3D5U6|A0A1S3D5U6_DIACI Trehalase OS=Diaphorina citri OX=121845 GN=LOC103511933 PE=3 SV=1;tr|A0A1S3D5M3|A0A1S3D5M3_DIACI Trehalase OS=Diaphorina citri O	4	11	11	11	25.6	70.286	596370	695110	707190	1157800	800130	722310	Quantified	GO:0005991(BP:trehalose metabolic process);GO:0004555(MF:alpha,alpha-trehalase activity)				PF01204(Trehalase)
A0A1S3D5L9	Moesin/ezrin/radixin homolog 1-like	LOC103511039		tr|A0A1S3D5L9|A0A1S3D5L9_DIACI;tr|A0A3Q0IWU6|A0A3Q0IWU6_DIACI	tr|A0A1S3D5L9|A0A1S3D5L9_DIACI Moesin/ezrin/radixin homolog 1-like OS=Diaphorina citri OX=121845 GN=LOC103511039 PE=4 SV=1;tr|A0A3Q0IWU6|A0A3Q0IWU6_DIACI Moesin/ezrin/radixin homolog 1-like OS=Diaphorina citri OX=121845 GN=LOC113468180 PE=4 SV=1	2	2	2	2	37.5	8.3145	482760	547970	592560		615250	251310	Quantified	GO:0005856(CC:cytoskeleton)				PF09379(FERM N-terminal domain)
A0A1S3D5P3	Trifunctional enzyme subunit beta, mitochondrial	LOC103511957		tr|A0A1S3D5P3|A0A1S3D5P3_DIACI	tr|A0A1S3D5P3|A0A1S3D5P3_DIACI Trifunctional enzyme subunit beta, mitochondrial OS=Diaphorina citri OX=121845 GN=LOC103511957 PE=3 SV=1	1	16	16	16	55.1	50.838	7316300	7983800	8710200	6903100	9832300	8263500	Quantified	GO:0016747(MF:transferase activity, transferring acyl groups other than amino-acyl groups)				PF00108(Thiolase, N-terminal domain);PF02803(Thiolase, C-terminal domain)
A0A1S3D5P5	Large ribosomal subunit protein uL18	LOC103511085		tr|A0A1S3D5P5|A0A1S3D5P5_DIACI	tr|A0A1S3D5P5|A0A1S3D5P5_DIACI Large ribosomal subunit protein uL18 OS=Diaphorina citri OX=121845 GN=LOC103511085 PE=3 SV=1	1	12	12	12	45.6	34.906	3131700	3671100	3386800	4390700	4788800	5383800	Quantified	GO:0006412(BP:translation);GO:0005840(CC:ribosome);GO:0008097(MF:5S rRNA binding);GO:0003735(MF:structural constituent of ribosome)			Cytoplasm	PF17144(Ribosomal large subunit proteins 60S L5, and 50S L18);PF14204(Ribosomal L18 C-terminal region)
A0A1S3D5P7	Glycerophosphocholine phosphodiesterase GPCPD1 isoform X3	LOC103511955		tr|A0A1S3D5P7|A0A1S3D5P7_DIACI;tr|A0A1S3D5P8|A0A1S3D5P8_DIACI;tr|A0A3Q0IYX4|A0A3Q0IYX4_DIACI	tr|A0A1S3D5P7|A0A1S3D5P7_DIACI Glycerophosphocholine phosphodiesterase GPCPD1 isoform X3 OS=Diaphorina citri OX=121845 GN=LOC103511955 PE=4 SV=1;tr|A0A1S3D5P8|A0A1S3D5P8_DIACI Glycerophosphocholine phosphodiesterase GPCPD1 isoform X2 OS=Diaphorina citri OX	3	7	7	7	17.9	69.202	112250	140990	160890	99400	97601	161300	Quantified	GO:0046475(BP:glycerophospholipid catabolic process);GO:0047389(MF:glycerophosphocholine phosphodiesterase activity);GO:2001070(MF:starch binding)				PF00686(Starch binding domain);PF03009(Glycerophosphoryl diester phosphodiesterase family)
A0A3Q0IYK5	Short/branched chain specific acyl-CoA dehydrogenase, mitochondrial isoform X3	LOC103511898		tr|A0A3Q0IYK5|A0A3Q0IYK5_DIACI;tr|A0A1S4EEX7|A0A1S4EEX7_DIACI;tr|A0A1S3D5S6|A0A1S3D5S6_DIACI	tr|A0A3Q0IYK5|A0A3Q0IYK5_DIACI Short/branched chain specific acyl-CoA dehydrogenase, mitochondrial isoform X3 OS=Diaphorina citri OX=121845 GN=LOC103511898 PE=3 SV=1;tr|A0A1S4EEX7|A0A1S4EEX7_DIACI Short/branched chain specific acyl-CoA dehydrogenase, mitoc	3	10	10	10	37.5	45.517	891560	877620	892130	677720	764530	652150	Quantified	GO:0003995(MF:acyl-CoA dehydrogenase activity);GO:0050660(MF:flavin adenine dinucleotide binding)				PF02770(Acyl-CoA dehydrogenase, middle domain);PF00441(Acyl-CoA dehydrogenase, C-terminal domain);PF02771(Acyl-CoA dehydrogenase, N-terminal domain)
A0A1S3D5W4	Diacylglycerol O-acyltransferase 1-like	LOC103512085		tr|A0A1S3D5W4|A0A1S3D5W4_DIACI	tr|A0A1S3D5W4|A0A1S3D5W4_DIACI Diacylglycerol O-acyltransferase 1-like OS=Diaphorina citri OX=121845 GN=LOC103512085 PE=3 SV=1	1	2	2	2	60.8	9.1104		25271	38074	25154	28306		Quantified	GO:0019432(BP:triglyceride biosynthetic process);GO:0016021(CC:integral component of membrane);GO:0004144(MF:diacylglycerol O-acyltransferase activity)			Endoplasmic reticulum membrane;Multi-pass membrane protein;Membrane	PF03062(MBOAT, membrane-bound O-acyltransferase family)
A0A1S3D5W7	Dynein light chain roadblock	LOC103512086		tr|A0A1S3D5W7|A0A1S3D5W7_DIACI	tr|A0A1S3D5W7|A0A1S3D5W7_DIACI Dynein light chain roadblock OS=Diaphorina citri OX=121845 GN=LOC103512086 PE=3 SV=1	1	3	3	3	50.5	10.749	254180	273840	235910	146970	321200	255550	Quantified	GO:0007018(BP:microtubule-based movement);GO:0005737(CC:cytoplasm);GO:0005868(CC:cytoplasmic dynein complex);GO:0005874(CC:microtubule);GO:0045505(MF:dynein intermediate chain binding);GO:0003774(MF:motor activity)			Cytoplasm;cytoskeleton	PF03259(Roadblock/LC7 domain)
A0A1S3D5Y9	Flocculation protein FLO11-like	LOC103511253		tr|A0A1S3D5Y9|A0A1S3D5Y9_DIACI;tr|A0A1S4EDV2|A0A1S4EDV2_DIACI	tr|A0A1S3D5Y9|A0A1S3D5Y9_DIACI Flocculation protein FLO11-like OS=Diaphorina citri OX=121845 GN=LOC103511253 PE=4 SV=1	2	5	5	5	7.6	106.41	503250	380380	304550	345220	342700	299180	Quantified
A0A1S3D5Z9	Mesencephalic astrocyte-derived neurotrophic factor homolog	LOC103511268		tr|A0A1S3D5Z9|A0A1S3D5Z9_DIACI	tr|A0A1S3D5Z9|A0A1S3D5Z9_DIACI Mesencephalic astrocyte-derived neurotrophic factor homolog OS=Diaphorina citri OX=121845 GN=LOC103511268 PE=3 SV=1	1	5	5	5	38.1	20.108	510090	714130	658010	230620	638640	639920	Quantified				Secreted	PF10208(Degradation arginine-rich protein for mis-folding)
A0A1S3D610	Serine protease K12H4.7	LOC103512024		tr|A0A1S3D610|A0A1S3D610_DIACI	tr|A0A1S3D610|A0A1S3D610_DIACI Serine protease K12H4.7 OS=Diaphorina citri OX=121845 GN=LOC103512024 PE=3 SV=1	1	14	14	14	53.1	40.425	1399200	1454000	1604700	1301600	1327100	1573900	Quantified	GO:0008236(MF:serine-type peptidase activity)				PF05577(Serine carboxypeptidase S28)
A0A1S3D612	Protein kinase C and casein kinase substrate in neurons protein 1-like	LOC103512194		tr|A0A1S3D612|A0A1S3D612_DIACI	tr|A0A1S3D612|A0A1S3D612_DIACI Protein kinase C and casein kinase substrate in neurons protein 1-like OS=Diaphorina citri OX=121845 GN=LOC103512194 PE=4 SV=1	1	2	2	2	33.6	13.898	152880	161850	138420	4478.1	128080	178980	Quantified	GO:0016301(MF:kinase activity)
A0A1S3D613	Protein kinase C and casein kinase II substrate protein 3-like isoform X1	LOC103512187		tr|A0A1S3D613|A0A1S3D613_DIACI;tr|A0A1S3D621|A0A1S3D621_DIACI;tr|A0A1S3DRR5|A0A1S3DRR5_DIACI	tr|A0A1S3D613|A0A1S3D613_DIACI Protein kinase C and casein kinase II substrate protein 3-like isoform X1 OS=Diaphorina citri OX=121845 GN=LOC103512187 PE=4 SV=1;tr|A0A1S3D621|A0A1S3D621_DIACI Protein kinase C and casein kinase substrate in neurons protein	3	5	5	4	18.7	37.244	587600	24963	414840	286610	239110	260000	Quantified	GO:0016301(MF:kinase activity)				PF14604(Variant SH3 domain)
A0A1S4ERT5	L-2-hydroxyglutarate dehydrogenase, mitochondrial-like	LOC103524011		tr|A0A1S4ERT5|A0A1S4ERT5_DIACI;tr|A0A3Q0J4B3|A0A3Q0J4B3_DIACI;tr|A0A1S3D622|A0A1S3D622_DIACI	tr|A0A1S4ERT5|A0A1S4ERT5_DIACI L-2-hydroxyglutarate dehydrogenase, mitochondrial-like OS=Diaphorina citri OX=121845 GN=LOC103524011 PE=4 SV=1;tr|A0A3Q0J4B3|A0A3Q0J4B3_DIACI L-2-hydroxyglutarate dehydrogenase, mitochondrial isoform X3 OS=Diaphorina citri OX	3	2	2	2	13.5	28.378	75869	28321	40738	50057	25572	26395	Quantified	GO:0016491(MF:oxidoreductase activity)				PF01266(FAD dependent oxidoreductase)
A0A1S3D625	Polyhomeotic-proximal chromatin protein	LOC103512053		tr|A0A1S3D625|A0A1S3D625_DIACI	tr|A0A1S3D625|A0A1S3D625_DIACI Polyhomeotic-proximal chromatin protein OS=Diaphorina citri OX=121845 GN=LOC103512053 PE=4 SV=1	1	2	2	2	5.1	78.935	37909	28755	46895	52103	29011	36342	Quantified	GO:0006338(BP:chromatin remodeling);GO:0000228(CC:nuclear chromosome)
A0A1S3D628	Glutathione S-transferase isoform X2	LOC103512218		tr|A0A1S3D628|A0A1S3D628_DIACI;tr|A0A1S3D637|A0A1S3D637_DIACI;tr|A0A482LUS4|A0A482LUS4_DIACI	tr|A0A1S3D628|A0A1S3D628_DIACI Glutathione S-transferase isoform X2 OS=Diaphorina citri OX=121845 GN=LOC103512218 PE=4 SV=1;tr|A0A1S3D637|A0A1S3D637_DIACI Glutathione S-transferase isoform X1 OS=Diaphorina citri OX=121845 GN=LOC103512218 PE=4 SV=1	3	8	7	4	37.9	23.797	521290	439520	563220	862050	453350	518340	Quantified	GO:0016740(MF:transferase activity)				PF14497(Glutathione S-transferase, C-terminal domain);PF02798(Glutathione S-transferase, N-terminal domain)
A0A1S3D629	Calcineurin subunit B type 2	LOC103511326		tr|A0A1S3D629|A0A1S3D629_DIACI	tr|A0A1S3D629|A0A1S3D629_DIACI Calcineurin subunit B type 2 OS=Diaphorina citri OX=121845 GN=LOC103511326 PE=3 SV=1	1	3	3	3	42.4	13.665	394040	246630	299140	225490	284690	353500	Quantified	GO:0005509(MF:calcium ion binding)				PF13202(EF hand);PF13499(EF-hand domain pair)
A0A1S3D647	SAP domain-containing ribonucleoprotein isoform X2	LOC103512243		tr|A0A1S3D647|A0A1S3D647_DIACI;tr|A0A1S3D643|A0A1S3D643_DIACI	tr|A0A1S3D647|A0A1S3D647_DIACI SAP domain-containing ribonucleoprotein isoform X2 OS=Diaphorina citri OX=121845 GN=LOC103512243 PE=4 SV=1;tr|A0A1S3D643|A0A1S3D643_DIACI SAP domain-containing ribonucleoprotein isoform X1 OS=Diaphorina citri OX=121845 GN=LOC	2	1	1	1	6.5	33.011	36316	34006	31451	41374	27693	28124	Quantified					PF02037(SAP domain)
A0A1S3D648	26S proteasome non-ATPase regulatory subunit 2	LOC103512234	FUNCTION: Component of the 26S proteasome, a multiprotein complex involved in the ATP-dependent degradation of ubiquitinated proteins. This complex plays a key role in the maintenance of protein homeostasis by removing misfolded or damaged proteins, which could impair cellular functions, and by removing proteins whose functions are no longer required. Therefore, the proteasome participates in num…	tr|A0A1S3D648|A0A1S3D648_DIACI	tr|A0A1S3D648|A0A1S3D648_DIACI 26S proteasome non-ATPase regulatory subunit 2 OS=Diaphorina citri OX=121845 GN=LOC103512234 PE=3 SV=1	1	23	23	23	38.3	100.92	1002500	1295100	1427200	1010700	1454800	1567900	Quantified	GO:0042176(BP:regulation of protein catabolic process);GO:0008540(CC:proteasome regulatory particle, base subcomplex);GO:0030234(MF:enzyme regulator activity)				PF01851(Proteasome/cyclosome repeat)
A0A1S3D651	60S ribosomal protein L44	LOC103512114		tr|A0A1S3D651|A0A1S3D651_DIACI	tr|A0A1S3D651|A0A1S3D651_DIACI 60S ribosomal protein L44 OS=Diaphorina citri OX=121845 GN=LOC103512114 PE=3 SV=1	1	2	2	2	20.2	12.518	390130	431720	380740	787420	535290	645690	Quantified	GO:0006412(BP:translation);GO:0005840(CC:ribosome);GO:0003735(MF:structural constituent of ribosome)				PF00935(Ribosomal protein L44)
A0A1S3D666	Pseudouridine-5-phosphatase-like	LOC103512259		tr|A0A1S3D666|A0A1S3D666_DIACI	tr|A0A1S3D666|A0A1S3D666_DIACI Pseudouridine-5-phosphatase-like OS=Diaphorina citri OX=121845 GN=LOC103512259 PE=4 SV=1	1	4	4	4	30.9	27.552	182900	316570	317430	88038	289360	212320	Quantified	GO:0016787(MF:hydrolase activity)	K01091(NA)	ko00630(Glyoxylate and dicarboxylate metabolism)		PF13419(Haloacid dehalogenase-like hydrolase)
A0A1S3D669	Mitochondrial-processing peptidase subunit beta	LOC103512280		tr|A0A1S3D669|A0A1S3D669_DIACI;tr|A0A3Q0IZB5|A0A3Q0IZB5_DIACI	tr|A0A1S3D669|A0A1S3D669_DIACI Mitochondrial-processing peptidase subunit beta OS=Diaphorina citri OX=121845 GN=LOC103512280 PE=4 SV=2	2	18	18	18	74.6	43.199	25662000	23407000	23998000	25105000	29972000	32738000	Quantified	GO:0003824(MF:catalytic activity);GO:0046872(MF:metal ion binding)				PF05193(Peptidase M16 inactive domain);PF00675(Insulinase (Peptidase family M16))
A0A1S3D683	Plasminogen activator inhibitor 1 RNA-binding protein	LOC103511418		tr|A0A1S3D683|A0A1S3D683_DIACI	tr|A0A1S3D683|A0A1S3D683_DIACI Plasminogen activator inhibitor 1 RNA-binding protein OS=Diaphorina citri OX=121845 GN=LOC103511418 PE=4 SV=1	1	5	5	5	24.5	26.192	782420	570190	458130	1088000	598040	730560	Quantified	GO:0003723(MF:RNA binding)				PF04774(Hyaluronan / mRNA binding family)
A0A1S3D693	Glucosamine-6-phosphate isomerase-like	LOC103512195		tr|A0A1S3D693|A0A1S3D693_DIACI	tr|A0A1S3D693|A0A1S3D693_DIACI Glucosamine-6-phosphate isomerase-like OS=Diaphorina citri OX=121845 GN=LOC103512195 PE=4 SV=1	1	2	1	1	23.9	17.298	29390	65890	48960	29612	51589	49010	Quantified	GO:0005975(BP:carbohydrate metabolic process);GO:0006044(BP:N-acetylglucosamine metabolic process);GO:0004342(MF:glucosamine-6-phosphate deaminase activity)				PF01182(Glucosamine-6-phosphate isomerases/6-phosphogluconolactonase)
A0A1S3D6C2	Vacuolar protein sorting-associated protein 4B-like	LOC103512387		tr|A0A1S3D6C2|A0A1S3D6C2_DIACI;tr|A0A3Q0IZN5|A0A3Q0IZN5_DIACI	tr|A0A1S3D6C2|A0A1S3D6C2_DIACI Vacuolar protein sorting-associated protein 4B-like OS=Diaphorina citri OX=121845 GN=LOC103512387 PE=4 SV=2;tr|A0A3Q0IZN5|A0A3Q0IZN5_DIACI Vacuolar protein sorting-associated protein 4B-like OS=Diaphorina citri OX=121845 GN=L	2	2	2	2	18.9	13.397	8496.8	51691	23391	25455	30882	21855	Quantified					PF09336(Vps4 C terminal oligomerisation domain)
A0A1S3D6D6	Succinate-semialdehyde dehydrogenase, mitochondrial-like	LOC103512390		tr|A0A1S3D6D6|A0A1S3D6D6_DIACI	tr|A0A1S3D6D6|A0A1S3D6D6_DIACI Succinate-semialdehyde dehydrogenase, mitochondrial-like OS=Diaphorina citri OX=121845 GN=LOC103512390 PE=3 SV=1	1	11	11	11	57.5	34.558	909190	755680	843730	1736500	969520	1038800	Quantified	GO:0016491(MF:oxidoreductase activity)				PF00171(Aldehyde dehydrogenase family)
A0A1S3D6F7	Uncharacterized protein LOC103512422	LOC103512422		tr|A0A1S3D6F7|A0A1S3D6F7_DIACI	tr|A0A1S3D6F7|A0A1S3D6F7_DIACI Uncharacterized protein LOC103512422 OS=Diaphorina citri OX=121845 GN=LOC103512422 PE=4 SV=1	1	3	3	3	22.8	22.312	272990	138170	159190	143260	145820	116250	Quantified
A0A1S3D6H8	Transmembrane 9 superfamily member	LOC103512457		tr|A0A1S3D6H8|A0A1S3D6H8_DIACI	tr|A0A1S3D6H8|A0A1S3D6H8_DIACI Transmembrane 9 superfamily member OS=Diaphorina citri OX=121845 GN=LOC103512457 PE=3 SV=2	1	2	2	1	7.8	42.617	50497	31713	87663	142500	52623	100070	Quantified	GO:0016021(CC:integral component of membrane)			Membrane;Multi-pass membrane protein	PF02990(Endomembrane protein 70)
A0A3Q0J4A4	Sialin-like isoform X1	LOC113465347		tr|A0A3Q0J4A4|A0A3Q0J4A4_DIACI;tr|A0A1S3D6I1|A0A1S3D6I1_DIACI	tr|A0A3Q0J4A4|A0A3Q0J4A4_DIACI Sialin-like isoform X1 OS=Diaphorina citri OX=121845 GN=LOC113465347 PE=4 SV=1;tr|A0A1S3D6I1|A0A1S3D6I1_DIACI Sialin OS=Diaphorina citri OX=121845 GN=LOC103512495 PE=4 SV=1	2	2	2	2	9.2	28.116	116350	102640	113180	230490	143970	128870	Quantified	GO:0016021(CC:integral component of membrane);GO:0022857(MF:transmembrane transporter activity)			Membrane;Multi-pass membrane protein	PF07690(Major Facilitator Superfamily)
A0A1S3D6S4	DnaJ homolog shv isoform X2	LOC103512511		tr|A0A1S3D6S4|A0A1S3D6S4_DIACI;tr|A0A1S3D6J2|A0A1S3D6J2_DIACI	tr|A0A1S3D6S4|A0A1S3D6S4_DIACI DnaJ homolog shv isoform X2 OS=Diaphorina citri OX=121845 GN=LOC103512511 PE=4 SV=1;tr|A0A1S3D6J2|A0A1S3D6J2_DIACI DnaJ homolog shv isoform X1 OS=Diaphorina citri OX=121845 GN=LOC103512511 PE=4 SV=1	2	7	7	7	26.9	41.189	586610	593250	425120	675750	526850	539080	Quantified	GO:0006457(BP:protein folding);GO:0051082(MF:unfolded protein binding)				PF01556(DnaJ C terminal domain);PF00226(DnaJ domain)
A0A1S3D6L1	Small ribosomal subunit protein RACK1	LOC103512534		tr|A0A1S3D6L1|A0A1S3D6L1_DIACI;tr|Q0PWT4|Q0PWT4_DIACI;tr|A0A3Q0J4C9|A0A3Q0J4C9_DIACI;tr|A0A3Q0IZZ1|A0A3Q0IZZ1_DIACI;tr|A0A3Q0ISS4|A0A3Q0ISS4_DIACI	tr|A0A1S3D6L1|A0A1S3D6L1_DIACI Small ribosomal subunit protein RACK1 OS=Diaphorina citri OX=121845 GN=LOC103512534 PE=3 SV=1	5	18	18	18	82.8	35.824	3275100	4608300	4931800	4726600	5464500	6517100	Quantified					PF00400(WD domain, G-beta repeat)
A0A1S3D6N8	Proteasome subunit alpha type-2	LOC103512444		tr|A0A1S3D6N8|A0A1S3D6N8_DIACI;tr|A0A3Q0IZT6|A0A3Q0IZT6_DIACI	tr|A0A1S3D6N8|A0A1S3D6N8_DIACI Proteasome subunit alpha type-2 OS=Diaphorina citri OX=121845 GN=LOC103512444 PE=3 SV=1	2	9	9	9	65.2	32.979	958700	1088100	1151300	1078400	1236600	1297300	Quantified	GO:0051603(BP:proteolysis involved in cellular protein catabolic process);GO:0005737(CC:cytoplasm);GO:0019773(CC:proteasome core complex, alpha-subunit complex);GO:0004298(MF:threonine-type endopeptidase activity)			Nucleus	PF00227(Proteasome subunit)
A0A1S3D6P1	hydroxyacid-oxoacid transhydrogenase	LOC103512568		tr|A0A1S3D6P1|A0A1S3D6P1_DIACI	tr|A0A1S3D6P1|A0A1S3D6P1_DIACI hydroxyacid-oxoacid transhydrogenase OS=Diaphorina citri OX=121845 GN=LOC103512568 PE=3 SV=1	1	14	14	14	52.1	50.949	2847400	2719800	2259800	1419600	5264300	3046400	Quantified	GO:0046872(MF:metal ion binding);GO:0016491(MF:oxidoreductase activity)			Mitochondrion	PF00465(Iron-containing alcohol dehydrogenase)
A0A1S3D849	Low molecular weight phosphotyrosine protein phosphatase 1-like isoform X2	LOC103512551		tr|A0A1S3D849|A0A1S3D849_DIACI;tr|A0A1S3D6P2|A0A1S3D6P2_DIACI	tr|A0A1S3D849|A0A1S3D849_DIACI Low molecular weight phosphotyrosine protein phosphatase 1-like isoform X2 OS=Diaphorina citri OX=121845 GN=LOC103512551 PE=4 SV=1;tr|A0A1S3D6P2|A0A1S3D6P2_DIACI acid phosphatase OS=Diaphorina citri OX=121845 GN=LOC103512551	2	2	2	2	14.6	23.686	21400	46363	15402	6603.4	7486.5	63148	Quantified					PF01451(Low molecular weight phosphotyrosine protein phosphatase)
A0A1S4EFH8	Uncharacterized protein LOC103512459	LOC103512459		tr|A0A1S4EFH8|A0A1S4EFH8_DIACI;tr|A0A1S3D6P8|A0A1S3D6P8_DIACI	tr|A0A1S4EFH8|A0A1S4EFH8_DIACI Uncharacterized protein LOC103512459 OS=Diaphorina citri OX=121845 GN=LOC103512459 PE=4 SV=1;tr|A0A1S3D6P8|A0A1S3D6P8_DIACI Uncharacterized protein LOC103512462 OS=Diaphorina citri OX=121845 GN=LOC103512462 PE=4 SV=1	2	1	1	1	9.4	16.333	490350	48844	52465	45702	26962		Quantified	GO:0045454(BP:cell redox homeostasis);GO:0005623(CC:cell)				PF00085(Thioredoxin)
A0A1S3D6Q0	Protein app1-like	LOC103511706		tr|A0A1S3D6Q0|A0A1S3D6Q0_DIACI	tr|A0A1S3D6Q0|A0A1S3D6Q0_DIACI Protein app1-like OS=Diaphorina citri OX=121845 GN=LOC103511706 PE=4 SV=1	1	1	1	1	10.3	30.221	95618	127480	100540	81265	159750	133670	Quantified
A0A1S3D6R4	UPF0160 protein isoform X1	LOC103512494		tr|A0A1S3D6R4|A0A1S3D6R4_DIACI	tr|A0A1S3D6R4|A0A1S3D6R4_DIACI UPF0160 protein isoform X1 OS=Diaphorina citri OX=121845 GN=LOC103512494 PE=3 SV=1	1	4	4	4	16	39.54	93725	96389	98336	109310	108500	68869	Quantified					PF03690(Uncharacterised protein family (UPF0160))
A0A1S3D6R6	Catalase-like	LOC103512632		tr|A0A1S3D6R6|A0A1S3D6R6_DIACI	tr|A0A1S3D6R6|A0A1S3D6R6_DIACI Catalase-like OS=Diaphorina citri OX=121845 GN=LOC103512632 PE=4 SV=1	1	5	1	0	71.1	12.521	1718100	1391200	1124700	2270600	1564100	1402800	Quantified	GO:0006979(BP:response to oxidative stress);GO:0004096(MF:catalase activity);GO:0020037(MF:heme binding)				PF00199(Catalase)
A0A1S3D6S2	Small nuclear ribonucleoprotein E	LOC103512593	FUNCTION: Associated with the spliceosome snRNP U1, U2, U4/U6 and U5. {ECO:0000256|RuleBase:RU365053}.	tr|A0A1S3D6S2|A0A1S3D6S2_DIACI;tr|A0A3Q0J011|A0A3Q0J011_DIACI	tr|A0A1S3D6S2|A0A1S3D6S2_DIACI Small nuclear ribonucleoprotein E OS=Diaphorina citri OX=121845 GN=LOC103512593 PE=3 SV=1;tr|A0A3Q0J011|A0A3Q0J011_DIACI Small nuclear ribonucleoprotein E OS=Diaphorina citri OX=121845 GN=LOC103512593 PE=3 SV=1	2	3	3	3	54.1	11.353	394380	516570	377230	576830	564840	667330	Quantified	GO:0000387(BP:spliceosomal snRNP assembly);GO:0005681(CC:spliceosomal complex);GO:0005685(CC:U1 snRNP);GO:0005686(CC:U2 snRNP);GO:0005687(CC:U4 snRNP);GO:0046540(CC:U4/U6 x U5 tri-snRNP complex);GO:0005682(CC:U5 snRNP);GO:0003723(MF:RNA binding)			Nucleus	PF01423(LSM domain)
A0A1S3D6T6	J domain-containing protein	LOC103512654		tr|A0A1S3D6T6|A0A1S3D6T6_DIACI	tr|A0A1S3D6T6|A0A1S3D6T6_DIACI J domain-containing protein OS=Diaphorina citri OX=121845 GN=LOC103512654 PE=4 SV=1	1	4	4	4	36.4	19.866	252100	267670	204580	153360	114140	129500	Quantified					PF00226(DnaJ domain)
A0A1S3D6U7	Immunoglobulin-binding protein 1	LOC103512543		tr|A0A1S3D6U7|A0A1S3D6U7_DIACI	tr|A0A1S3D6U7|A0A1S3D6U7_DIACI Immunoglobulin-binding protein 1 OS=Diaphorina citri OX=121845 GN=LOC103512543 PE=4 SV=1	1	2	2	2	9.8	23.02	90272	58484	61819	121250	63784	57519	Quantified	GO:0009966(BP:regulation of signal transduction)				PF04177(TAP42-like family)
A0A1S3D6V2	Uncharacterized protein LOC103512692	LOC103512692		tr|A0A1S3D6V2|A0A1S3D6V2_DIACI	tr|A0A1S3D6V2|A0A1S3D6V2_DIACI Uncharacterized protein LOC103512692 OS=Diaphorina citri OX=121845 GN=LOC103512692 PE=4 SV=1	1	3	3	3	26.3	22.709	8837.5	31986	28462	15969	63117	24659	Quantified
A0A1S3D6V9	54S ribosomal protein L12, mitochondrial	LOC103512703		tr|A0A1S3D6V9|A0A1S3D6V9_DIACI;tr|A0A1S4EBY1|A0A1S4EBY1_DIACI	tr|A0A1S3D6V9|A0A1S3D6V9_DIACI 54S ribosomal protein L12, mitochondrial OS=Diaphorina citri OX=121845 GN=LOC103512703 PE=4 SV=1;tr|A0A1S4EBY1|A0A1S4EBY1_DIACI Uncharacterized protein LOC108252404 OS=Diaphorina citri OX=121845 GN=LOC108252404 PE=4 SV=1	2	4	4	4	36.5	10.412	490470	364190	315660	456920	336150	278300	Quantified	GO:0006412(BP:translation);GO:0005840(CC:ribosome);GO:0003735(MF:structural constituent of ribosome)	K02935(NA)	ko03010(Ribosome)		PF00542(Ribosomal protein L7/L12 C-terminal domain)
A0A1S3D6W1	Twitchin-like	LOC103512720		tr|A0A1S3D6W1|A0A1S3D6W1_DIACI	tr|A0A1S3D6W1|A0A1S3D6W1_DIACI Twitchin-like OS=Diaphorina citri OX=121845 GN=LOC103512720 PE=4 SV=1	1	13	1	1	53.4	33.617	933050	463260	585680	629110	531390	428260	Quantified	GO:0042578(MF:phosphoric ester hydrolase activity)				PF00041(Fibronectin type III domain)
A0A1S3D6W9	Alpha-1,3/1,6-mannosyltransferase ALG2	LOC103512674		tr|A0A1S3D6W9|A0A1S3D6W9_DIACI	tr|A0A1S3D6W9|A0A1S3D6W9_DIACI Alpha-1,3/1,6-mannosyltransferase ALG2 OS=Diaphorina citri OX=121845 GN=LOC103512674 PE=3 SV=1	1	4	4	4	16.4	46.708	27747	69883	104700	29624	74030	177140	Quantified	GO:0006486(BP:protein glycosylation);GO:0016021(CC:integral component of membrane);GO:0004378(MF:GDP-Man:Man1GlcNAc2-PP-Dol alpha-1,3-mannosyltransferase activity)			Membrane	PF13439(Glycosyltransferase Family 4);PF00534(Glycosyl transferases group 1)
A0A1S3D6Y2	Deoxynucleoside triphosphate triphosphohydrolase SAMHD1	LOC103512752		tr|A0A1S3D6Y2|A0A1S3D6Y2_DIACI	tr|A0A1S3D6Y2|A0A1S3D6Y2_DIACI Deoxynucleoside triphosphate triphosphohydrolase SAMHD1 OS=Diaphorina citri OX=121845 GN=LOC103512752 PE=4 SV=1	1	10	10	10	62.5	29.867	1948500	2505500	2233800	3976200	4327300	4617700	Quantified	GO:0016787(MF:hydrolase activity)				PF01966(HD domain)
A0A1S3D6Z9	Malectin	LOC103512742		tr|A0A1S3D6Z9|A0A1S3D6Z9_DIACI	tr|A0A1S3D6Z9|A0A1S3D6Z9_DIACI Malectin OS=Diaphorina citri OX=121845 GN=LOC103512742 PE=3 SV=1	1	8	8	8	48.3	29.874	449760	492720	520510	559310	462840	583450	Quantified	GO:0016021(CC:integral component of membrane);GO:0030246(MF:carbohydrate binding)			Endoplasmic reticulum membrane;Single-pass type I membrane protein;Membrane	PF11721(Di-glucose binding within endoplasmic reticulum)
A0A1S3D717	Serine/threonine-protein phosphatase	LOC103512815		tr|A0A1S3D717|A0A1S3D717_DIACI	tr|A0A1S3D717|A0A1S3D717_DIACI Serine/threonine-protein phosphatase OS=Diaphorina citri OX=121845 GN=LOC103512815 PE=3 SV=1	1	2	1	1	7.3	37.29	204730	228040	213890	383020	247880	280500	Quantified	GO:0000164(CC:protein phosphatase type 1 complex);GO:0072357(CC:PTW/PP1 phosphatase complex);GO:0046872(MF:metal ion binding);GO:0004722(MF:protein serine/threonine phosphatase activity)				PF16891(Serine-threonine protein phosphatase N-terminal domain);PF00149(Calcineurin-like phosphoesterase)
A0A1S3D726	La protein homolog isoform X1	LOC103511897		tr|A0A1S3D726|A0A1S3D726_DIACI	tr|A0A1S3D726|A0A1S3D726_DIACI La protein homolog isoform X1 OS=Diaphorina citri OX=121845 GN=LOC103511897 PE=4 SV=1	1	7	7	7	28.2	44.384	496070	525010	357020	1039600	663850	825130	Quantified	GO:0006396(BP:RNA processing);GO:0005634(CC:nucleus);GO:1990904(CC:ribonucleoprotein complex);GO:0003723(MF:RNA binding)				PF05383(La domain);PF00076(RNA recognition motif. (a.k.a. RRM, RBD, or RNP domain));PF08777(RNA binding motif)
A0A1S3D745	Dystonin-like	LOC103512691		tr|A0A1S3D745|A0A1S3D745_DIACI;tr|A0A3Q0JNR7|A0A3Q0JNR7_DIACI	tr|A0A1S3D745|A0A1S3D745_DIACI Dystonin-like OS=Diaphorina citri OX=121845 GN=LOC103512691 PE=4 SV=1;tr|A0A3Q0JNR7|A0A3Q0JNR7_DIACI Dystonin OS=Diaphorina citri OX=121845 GN=LOC103523674 PE=4 SV=1	2	2	2	2	7.3	50.658	56281	76019	75798	119810	112620	124110	Quantified
A0A1S3D756	Cathepsin B-like cysteine proteinase 4	LOC103511936		tr|A0A1S3D756|A0A1S3D756_DIACI	tr|A0A1S3D756|A0A1S3D756_DIACI Cathepsin B-like cysteine proteinase 4 OS=Diaphorina citri OX=121845 GN=LOC103511936 PE=3 SV=1	1	3	3	3	10.9	49.208	68548	85926	51542	16884	10924	25106	Quantified	GO:0008234(MF:cysteine-type peptidase activity)				PF00112(Papain family cysteine protease)
A0A1S3D763	Tubulin-folding cofactor B	LOC103512889		tr|A0A1S3D763|A0A1S3D763_DIACI	tr|A0A1S3D763|A0A1S3D763_DIACI Tubulin-folding cofactor B OS=Diaphorina citri OX=121845 GN=LOC103512889 PE=4 SV=1	1	3	3	3	15.4	27.745	119320	106530	80155	45342	70293	79378	Quantified					PF01302(CAP-Gly domain);PF14560(Ubiquitin-like domain)
A0A1S3D787	Homocysteine S-methyltransferase 2-like	LOC103512891		tr|A0A1S3D787|A0A1S3D787_DIACI;tr|A0A3Q0J0N3|A0A3Q0J0N3_DIACI	tr|A0A1S3D787|A0A1S3D787_DIACI Homocysteine S-methyltransferase 2-like OS=Diaphorina citri OX=121845 GN=LOC103512891 PE=4 SV=1	2	6	6	6	33.8	35.321	268510	249130	350170	254120	198350	192580	Quantified	GO:0032259(BP:methylation);GO:0046872(MF:metal ion binding);GO:0008168(MF:methyltransferase activity)				PF02574(Homocysteine S-methyltransferase)
A0A1S3D799	Skin secretory protein xP2-like	LOC103512800		tr|A0A1S3D799|A0A1S3D799_DIACI	tr|A0A1S3D799|A0A1S3D799_DIACI Skin secretory protein xP2-like OS=Diaphorina citri OX=121845 GN=LOC103512800 PE=4 SV=1	1	4	3	3	11.5	58.599	202350	115520	118820	6067.5	44276	34502	Quantified	GO:0016021(CC:integral component of membrane);GO:0042302(MF:structural constituent of cuticle)				PF00379(Insect cuticle protein)
A0A1S3D7B6	Alpha-crystallin A chain-like	LOC103512951		tr|A0A1S3D7B6|A0A1S3D7B6_DIACI;tr|A0A3Q0JF24|A0A3Q0JF24_DIACI	tr|A0A1S3D7B6|A0A1S3D7B6_DIACI Alpha-crystallin A chain-like OS=Diaphorina citri OX=121845 GN=LOC103512951 PE=3 SV=1	2	7	7	7	44.4	21.157	1864000	1292200	1151200	4248000	3436400	3245200	Quantified	GO:0046872(MF:metal ion binding)				PF00011(Hsp20/alpha crystallin family)
A0A1S3D7B8	Coiled-coil-helix-coiled-coil-helix domain-containing protein 1	LOC103512975		tr|A0A1S3D7B8|A0A1S3D7B8_DIACI	tr|A0A1S3D7B8|A0A1S3D7B8_DIACI Coiled-coil-helix-coiled-coil-helix domain-containing protein 1 OS=Diaphorina citri OX=121845 GN=LOC103512975 PE=4 SV=1	1	2	2	2	16.7	14.59	16821	13453	23020	42409	14124	18474	Quantified	GO:0032543(BP:mitochondrial translation);GO:0005761(CC:mitochondrial ribosome)
A0A1S3D7C6	Uncharacterized protein LOC103512961	LOC103512961		tr|A0A1S3D7C6|A0A1S3D7C6_DIACI	tr|A0A1S3D7C6|A0A1S3D7C6_DIACI Uncharacterized protein LOC103512961 OS=Diaphorina citri OX=121845 GN=LOC103512961 PE=4 SV=1	1	1	1	1	18.2	18.368	29183	46755	32338		22691	2857.3	Quantified	GO:0003700(MF:DNA-binding transcription factor activity);GO:0042302(MF:structural constituent of cuticle)			Nucleus	PF00379(Insect cuticle protein)
A0A1S3D7F8	Calponin	LOC103513027	FUNCTION: Thin filament-associated protein that is implicated in the regulation and modulation of smooth muscle contraction. It is capable of binding to actin, calmodulin, troponin C and tropomyosin. The interaction of calponin with actin inhibits the actomyosin Mg-ATPase activity. {ECO:0000256|RuleBase:RU361224}.	tr|A0A1S3D7F8|A0A1S3D7F8_DIACI	tr|A0A1S3D7F8|A0A1S3D7F8_DIACI Calponin OS=Diaphorina citri OX=121845 GN=LOC103513027 PE=3 SV=1	1	11	11	11	71.6	19.158	9426200	7988100	6929900	5614900	6491800	5820200	Quantified	GO:0031032(BP:actomyosin structure organization);GO:0003779(MF:actin binding);GO:0005516(MF:calmodulin binding)				PF00402(Calponin family repeat);PF00307(Calponin homology (CH) domain)
A0A1S3D7F9	Alpha-1,4 glucan phosphorylase	LOC103512901	FUNCTION: Phosphorylase is an important allosteric enzyme in carbohydrate metabolism. Enzymes from different sources differ in their regulatory mechanisms and in their natural substrates. However, all known phosphorylases share catalytic and structural properties. {ECO:0000256|RuleBase:RU000587}.	tr|A0A1S3D7F9|A0A1S3D7F9_DIACI	tr|A0A1S3D7F9|A0A1S3D7F9_DIACI Alpha-1,4 glucan phosphorylase OS=Diaphorina citri OX=121845 GN=LOC103512901 PE=3 SV=1	1	3	3	3	61.9	8.9323	729050	649630	1031300	1077500	916300	972960	Quantified	GO:0005975(BP:carbohydrate metabolic process);GO:0008184(MF:glycogen phosphorylase activity);GO:0102250(MF:linear malto-oligosaccharide phosphorylase activity);GO:0102499(MF:SHG alpha-glucan phosphorylase activity)				PF00343(Carbohydrate phosphorylase)
A0A1S3D7G1	DnaJ homolog subfamily C member 28-like	LOC103512117		tr|A0A1S3D7G1|A0A1S3D7G1_DIACI	tr|A0A1S3D7G1|A0A1S3D7G1_DIACI DnaJ homolog subfamily C member 28-like OS=Diaphorina citri OX=121845 GN=LOC103512117 PE=4 SV=1	1	1	1	1	10.9	18.157	20862		20685	18677	49903	25007	Quantified					PF00226(DnaJ domain)
A0A1S3D7J3	Malate dehydrogenase	LOC103513073		tr|A0A1S3D7J3|A0A1S3D7J3_DIACI	tr|A0A1S3D7J3|A0A1S3D7J3_DIACI Malate dehydrogenase OS=Diaphorina citri OX=121845 GN=LOC103513073 PE=3 SV=1	1	9	9	7	79.4	16.824	13578000	11605000	13108000	22678000	15657000	16174000	Quantified	GO:0005975(BP:carbohydrate metabolic process);GO:0006108(BP:malate metabolic process);GO:0006099(BP:tricarboxylic acid cycle);GO:0030060(MF:L-malate dehydrogenase activity)				PF02866(lactate/malate dehydrogenase, alpha/beta C-terminal domain);PF00056(lactate/malate dehydrogenase, NAD binding domain)
A0A1S3D7K2	eIF-2B GDP-GTP exchange factor subunit epsilon	LOC103512974		tr|A0A1S3D7K2|A0A1S3D7K2_DIACI	tr|A0A1S3D7K2|A0A1S3D7K2_DIACI eIF-2B GDP-GTP exchange factor subunit epsilon OS=Diaphorina citri OX=121845 GN=LOC103512974 PE=3 SV=1	1	3	3	3	6.4	70.802	30254	54532	65854	36044	84382	53191	Quantified	GO:0016740(MF:transferase activity);GO:0003743(MF:translation initiation factor activity)				PF00132(Bacterial transferase hexapeptide (six repeats));PF02020(eIF4-gamma/eIF5/eIF2-epsilon)
A0A1S3D7L4	Apolipoprotein D-like	LOC103513091		tr|A0A1S3D7L4|A0A1S3D7L4_DIACI	tr|A0A1S3D7L4|A0A1S3D7L4_DIACI Apolipoprotein D-like OS=Diaphorina citri OX=121845 GN=LOC103513091 PE=4 SV=1	1	8	8	8	47.3	23.438	7904300	5028600	3114500	10247000	5912300	9441100	Quantified					PF00061(Lipocalin / cytosolic fatty-acid binding protein family)
A0A1S3D7M0	NADH dehydrogenase [ubiquinone] iron-sulfur protein 3, mitochondrial	LOC103513123		tr|A0A1S3D7M0|A0A1S3D7M0_DIACI	tr|A0A1S3D7M0|A0A1S3D7M0_DIACI NADH dehydrogenase [ubiquinone] iron-sulfur protein 3, mitochondrial OS=Diaphorina citri OX=121845 GN=LOC103513123 PE=3 SV=1	1	14	14	11	70.2	30.776	7875600	7113100	6085000	12651000	9103400	8555300	Quantified	GO:0008137(MF:NADH dehydrogenase (ubiquinone) activity)	K00332(NA)	ko00190(Oxidative phosphorylation)		PF00329(Respiratory-chain NADH dehydrogenase, 30 Kd subunit)
A0A3Q0IZJ8	39S ribosomal protein L13, mitochondrial-like	LOC103512455		tr|A0A3Q0IZJ8|A0A3Q0IZJ8_DIACI;tr|A0A1S3D7P3|A0A1S3D7P3_DIACI	tr|A0A3Q0IZJ8|A0A3Q0IZJ8_DIACI 39S ribosomal protein L13, mitochondrial-like OS=Diaphorina citri OX=121845 GN=LOC103512455 PE=3 SV=1;tr|A0A1S3D7P3|A0A1S3D7P3_DIACI 39S ribosomal protein L13, mitochondrial OS=Diaphorina citri OX=121845 GN=LOC103512279 PE=3	2	2	2	2	18.4	16.026	17125	19609	24529		34150	28741	Quantified	GO:0006412(BP:translation);GO:0005840(CC:ribosome);GO:0003735(MF:structural constituent of ribosome)	K02871(NA)	ko03010(Ribosome)		PF00572(Ribosomal protein L13)
A0A1S3D7P9	Multiple inositol polyphosphate phosphatase 1	LOC103513143		tr|A0A1S3D7P9|A0A1S3D7P9_DIACI	tr|A0A1S3D7P9|A0A1S3D7P9_DIACI Multiple inositol polyphosphate phosphatase 1 OS=Diaphorina citri OX=121845 GN=LOC103513143 PE=4 SV=1	1	3	3	3	14.7	32.931	29738	268620	107160	144310	162040	141430	Quantified					PF00328(Histidine phosphatase superfamily (branch 2))
A0A1S3DRH5	Signal recognition particle receptor subunit beta	LOC103523444		tr|A0A1S3DRH5|A0A1S3DRH5_DIACI;tr|A0A1S3D7Q3|A0A1S3D7Q3_DIACI	tr|A0A1S3DRH5|A0A1S3DRH5_DIACI Signal recognition particle receptor subunit beta OS=Diaphorina citri OX=121845 GN=LOC103523444 PE=3 SV=2;tr|A0A1S3D7Q3|A0A1S3D7Q3_DIACI Signal recognition particle receptor subunit beta OS=Diaphorina citri OX=121845 GN=LOC10	2	2	2	2	14.5	24.96	40033	40102	44373	17537	29685	46098	Quantified				Endoplasmic reticulum membrane;Single-pass membrane protein;Membrane	PF09439(Signal recognition particle receptor beta subunit)
A0A1S3D7R1	NADH dehydrogenase [ubiquinone] 1 alpha subcomplex subunit 13	LOC103513178		tr|A0A1S3D7R1|A0A1S3D7R1_DIACI	tr|A0A1S3D7R1|A0A1S3D7R1_DIACI NADH dehydrogenase [ubiquinone] 1 alpha subcomplex subunit 13 OS=Diaphorina citri OX=121845 GN=LOC103513178 PE=3 SV=1	1	7	7	7	50.3	18.017	1757100	1803100	1974300	3522700	3054600	2729700	Quantified	GO:0016021(CC:integral component of membrane)			Mitochondrion inner membrane;Single-pass membrane protein;Matrix side	PF06212(GRIM-19 protein)
A0A1S3D7T0	2-oxoglutarate dehydrogenase-like, mitochondrial isoform X1	LOC103513212		tr|A0A1S3D7T0|A0A1S3D7T0_DIACI	tr|A0A1S3D7T0|A0A1S3D7T0_DIACI 2-oxoglutarate dehydrogenase-like, mitochondrial isoform X1 OS=Diaphorina citri OX=121845 GN=LOC103513212 PE=3 SV=1	1	5	2	2	43.1	18.281	429160	274830	305110	100650	323860	478970	Quantified	GO:0006099(BP:tricarboxylic acid cycle);GO:0004591(MF:oxoglutarate dehydrogenase (succinyl-transferring) activity);GO:0030976(MF:thiamine pyrophosphate binding)				PF16870(2-oxoglutarate dehydrogenase C-terminal)
A0A1S3D7T1	Proteasome subunit beta	LOC103513094		tr|A0A1S3D7T1|A0A1S3D7T1_DIACI	tr|A0A1S3D7T1|A0A1S3D7T1_DIACI Proteasome subunit beta OS=Diaphorina citri OX=121845 GN=LOC103513094 PE=3 SV=1	1	4	4	4	34.6	22.846	171950	243840	236090	431700	229690	261530	Quantified	GO:0043161(BP:proteasome-mediated ubiquitin-dependent protein catabolic process);GO:0005737(CC:cytoplasm);GO:0005634(CC:nucleus);GO:0019774(CC:proteasome core complex, beta-subunit complex);GO:0004298(MF:threonine-type endopeptidase activity)			Cytoplasm;Nucleus	PF00227(Proteasome subunit)
A0A1S3D7T6	UPF0389 protein CG9231	LOC103513213		tr|A0A1S3D7T6|A0A1S3D7T6_DIACI	tr|A0A1S3D7T6|A0A1S3D7T6_DIACI UPF0389 protein CG9231 OS=Diaphorina citri OX=121845 GN=LOC103513213 PE=3 SV=1	1	4	4	4	28.5	17.232	586180	305100	205830	816990	590270	645250	Quantified	GO:0016021(CC:integral component of membrane)			Membrane;Single-pass membrane protein	PF06388(Protein of unknown function (DUF1075))
A0A1S3D7T8	Kynurenine/alpha-aminoadipate aminotransferase, mitochondrial	LOC103513100		tr|A0A1S3D7T8|A0A1S3D7T8_DIACI	tr|A0A1S3D7T8|A0A1S3D7T8_DIACI Kynurenine/alpha-aminoadipate aminotransferase, mitochondrial OS=Diaphorina citri OX=121845 GN=LOC103513100 PE=4 SV=1	1	4	4	4	13.9	55.443	153780	101670	103880	243090	109500	128050	Quantified	GO:0009058(BP:biosynthetic process);GO:0030170(MF:pyridoxal phosphate binding);GO:0008483(MF:transaminase activity)	K00812(NA)	ko00220(Arginine biosynthesis);ko00250(Alanine, aspartate and glutamate metabolism);ko00270(Cysteine and methionine metabolism);ko00330(Arginine and proline metabolism);ko00350(Tyrosine metabolism);ko00360(Phenylalanine metabolism);ko00400(Phenylalanine, tyrosine and tryptophan biosynthesis);ko00401(Novobiocin biosynthesis);ko00950(Isoquinoline alkaloid biosynthesis);ko00960(Tropane, piperidine a…		PF00155(Aminotransferase class I and II)
A0A1S3D7U8	SURF1-like protein	LOC103513124	FUNCTION: Probably involved in the biogenesis of the COX complex. {ECO:0000256|RuleBase:RU363076}.	tr|A0A1S3D7U8|A0A1S3D7U8_DIACI	tr|A0A1S3D7U8|A0A1S3D7U8_DIACI SURF1-like protein OS=Diaphorina citri OX=121845 GN=LOC103513124 PE=3 SV=1	1	2	2	2	5.8	31.359	45603	51948	47657	84863	63246	53413	Quantified	GO:0016021(CC:integral component of membrane);GO:0005743(CC:mitochondrial inner membrane)			Mitochondrion inner membrane;Multi-pass membrane protein	PF02104(SURF1 family)
A0A1S3D7U9	Succinate-semialdehyde dehydrogenase, mitochondrial-like	LOC103512391		tr|A0A1S3D7U9|A0A1S3D7U9_DIACI	tr|A0A1S3D7U9|A0A1S3D7U9_DIACI Succinate-semialdehyde dehydrogenase, mitochondrial-like OS=Diaphorina citri OX=121845 GN=LOC103512391 PE=4 SV=1	1	1	1	1	13.8	16.081	413410	327210	390700	872670	403820	448580	Quantified	GO:0016620(MF:oxidoreductase activity, acting on the aldehyde or oxo group of donors, NAD or NADP as acceptor)				PF00171(Aldehyde dehydrogenase family)
A0A1S3D7V4	S-phase kinase-associated protein 1	LOC103512398		tr|A0A1S3D7V4|A0A1S3D7V4_DIACI	tr|A0A1S3D7V4|A0A1S3D7V4_DIACI S-phase kinase-associated protein 1 OS=Diaphorina citri OX=121845 GN=LOC103512398 PE=3 SV=1	1	10	10	10	74.7	18.591	1648000	1541800	1179900	1968800	1352800	1549900	Quantified	GO:0006511(BP:ubiquitin-dependent protein catabolic process);GO:0016301(MF:kinase activity)				PF03931(Skp1 family, tetramerisation domain);PF01466(Skp1 family, dimerisation domain)
A0A1S3D973	Sex-lethal homolog isoform X4	LOC103513155		tr|A0A1S3D973|A0A1S3D973_DIACI;tr|A0A3Q0J6E4|A0A3Q0J6E4_DIACI;tr|A0A1S3D7X3|A0A1S3D7X3_DIACI	tr|A0A1S3D973|A0A1S3D973_DIACI Sex-lethal homolog isoform X4 OS=Diaphorina citri OX=121845 GN=LOC103513155 PE=4 SV=1;tr|A0A3Q0J6E4|A0A3Q0J6E4_DIACI Sex-lethal homolog isoform X3 OS=Diaphorina citri OX=121845 GN=LOC103513155 PE=4 SV=1;tr|A0A1S3D7X3|A0A1S3D7	3	5	5	5	31.8	24.77	424970	484510	320040	392780	336270	330540	Quantified	GO:1990904(CC:ribonucleoprotein complex);GO:0003723(MF:RNA binding)				PF00076(RNA recognition motif. (a.k.a. RRM, RBD, or RNP domain))
A0A1S3D7X6	Uncharacterized protein LOC103513259	LOC103513259		tr|A0A1S3D7X6|A0A1S3D7X6_DIACI	tr|A0A1S3D7X6|A0A1S3D7X6_DIACI Uncharacterized protein LOC103513259 OS=Diaphorina citri OX=121845 GN=LOC103513259 PE=4 SV=1	1	2	2	2	11.3	30.33	11131	16953		151170	3715.2	72582	Quantified					PF00650(CRAL/TRIO domain)
A0A1S3D7Z6	Ubiquitin activating enzyme 4	LOC103513305		tr|A0A1S3D7Z6|A0A1S3D7Z6_DIACI	tr|A0A1S3D7Z6|A0A1S3D7Z6_DIACI Ubiquitin activating enzyme 4 OS=Diaphorina citri OX=121845 GN=LOC103513305 PE=4 SV=1	1	2	2	2	6.7	58.406		31849	14280	4067.7	5477	5673	Quantified	GO:0005524(MF:ATP binding);GO:0016779(MF:nucleotidyltransferase activity);GO:0008641(MF:ubiquitin-like modifier activating enzyme activity)				PF00899(ThiF family);PF00581(Rhodanese-like domain)
A0A1S3D812	von Willebrand factor A domain-containing protein 8	LOC103513327		tr|A0A1S3D812|A0A1S3D812_DIACI	tr|A0A1S3D812|A0A1S3D812_DIACI von Willebrand factor A domain-containing protein 8 OS=Diaphorina citri OX=121845 GN=LOC103513327 PE=4 SV=1	1	2	2	2	11.3	37.176	42520	46499	48400	33256	35008	23078	Quantified	GO:0005524(MF:ATP binding);GO:0016887(MF:ATPase activity)				PF07728(AAA domain (dynein-related subfamily))
A0A1S3D815	von Willebrand factor A domain-containing protein 8	LOC103513324		tr|A0A1S3D815|A0A1S3D815_DIACI;tr|A0A1S3DPX9|A0A1S3DPX9_DIACI	tr|A0A1S3D815|A0A1S3D815_DIACI von Willebrand factor A domain-containing protein 8 OS=Diaphorina citri OX=121845 GN=LOC103513324 PE=4 SV=2	2	3	3	3	4.8	112.9	2202800	2707000	2559400	1465200	2523700	2339900	Quantified	GO:0005524(MF:ATP binding);GO:0016887(MF:ATPase activity)				PF07728(AAA domain (dynein-related subfamily))
A0A1S3D824	Facilitated trehalose transporter Tret1-like	LOC103512517		tr|A0A1S3D824|A0A1S3D824_DIACI	tr|A0A1S3D824|A0A1S3D824_DIACI Facilitated trehalose transporter Tret1-like OS=Diaphorina citri OX=121845 GN=LOC103512517 PE=4 SV=1	1	2	2	2	5	58.496	114870	111150	2617.4	107570	86966	151700	Quantified	GO:0016021(CC:integral component of membrane);GO:0022857(MF:transmembrane transporter activity)				PF00083(Sugar (and other) transporter)
A0A3Q0IZY5	Glucose-induced degradation protein 8 homolog isoform X2	LOC103512524		tr|A0A3Q0IZY5|A0A3Q0IZY5_DIACI;tr|A0A1S3D829|A0A1S3D829_DIACI	tr|A0A3Q0IZY5|A0A3Q0IZY5_DIACI Glucose-induced degradation protein 8 homolog isoform X2 OS=Diaphorina citri OX=121845 GN=LOC103512524 PE=4 SV=1;tr|A0A1S3D829|A0A1S3D829_DIACI Glucose-induced degradation protein 8 homolog isoform X1 OS=Diaphorina citri OX=1	2	1	1	1	13.4	24.147	41703	53941		1751.5	619.87	8645.6	Quantified					PF08513(LisH);PF10607(CTLH/CRA C-terminal to LisH motif domain)
A0A1S3D847	S-adenosylmethionine synthase	LOC103513245	FUNCTION: Catalyzes the formation of S-adenosylmethionine from methionine and ATP. {ECO:0000256|RuleBase:RU000541}.	tr|A0A1S3D847|A0A1S3D847_DIACI	tr|A0A1S3D847|A0A1S3D847_DIACI S-adenosylmethionine synthase OS=Diaphorina citri OX=121845 GN=LOC103513245 PE=3 SV=1	1	7	7	1	29.3	44.325	449180	392050	340150	750960	357000	543250	Quantified	GO:0006730(BP:one-carbon metabolic process);GO:0006556(BP:S-adenosylmethionine biosynthetic process);GO:0005524(MF:ATP binding);GO:0046872(MF:metal ion binding);GO:0004478(MF:methionine adenosyltransferase activity)	K00789(NA)	ko00270(Cysteine and methionine metabolism);ko00999(Biosynthesis of various plant secondary metabolites);ko01240(Biosynthesis of cofactors)		PF00438(S-adenosylmethionine synthetase, N-terminal domain);PF02772(S-adenosylmethionine synthetase, central domain);PF02773(S-adenosylmethionine synthetase, C-terminal domain)
A0A1S3D853	Protein odr-4 homolog	LOC103513401		tr|A0A1S3D853|A0A1S3D853_DIACI	tr|A0A1S3D853|A0A1S3D853_DIACI Protein odr-4 homolog OS=Diaphorina citri OX=121845 GN=LOC103513401 PE=3 SV=1	1	3	3	3	11.2	51.646	98608	79644	137850	54713	102640	72571	Quantified					PF14778(Olfactory receptor 4-like)
A0A1S3D855	Charged multivesicular body protein 7	LOC103513403		tr|A0A1S3D855|A0A1S3D855_DIACI	tr|A0A1S3D855|A0A1S3D855_DIACI Charged multivesicular body protein 7 OS=Diaphorina citri OX=121845 GN=LOC103513403 PE=3 SV=1	1	3	3	3	12.5	49.271	2325100	5195000	2548900	36252	5788600	1415300	Quantified	GO:0007034(BP:vacuolar transport)				PF03357(Snf7)
A0A1S3D863	Uncharacterized protein LOC103513290	LOC103513290		tr|A0A1S3D863|A0A1S3D863_DIACI	tr|A0A1S3D863|A0A1S3D863_DIACI Uncharacterized protein LOC103513290 OS=Diaphorina citri OX=121845 GN=LOC103513290 PE=4 SV=1	1	2	2	2	28.7	15.655	140730	106000	59555	1332400	488530	647210	Quantified
A0A1S3D866	NADH dehydrogenase [ubiquinone] iron-sulfur protein 6, mitochondrial-like	LOC103513427		tr|A0A1S3D866|A0A1S3D866_DIACI;tr|A0A1S3D0J9|A0A1S3D0J9_DIACI	tr|A0A1S3D866|A0A1S3D866_DIACI NADH dehydrogenase [ubiquinone] iron-sulfur protein 6, mitochondrial-like OS=Diaphorina citri OX=121845 GN=LOC103513427 PE=4 SV=1;tr|A0A1S3D0J9|A0A1S3D0J9_DIACI NADH dehydrogenase [ubiquinone] iron-sulfur protein 6, mitochond	2	4	4	4	57	13.796	3487700	3055500	2310600	5632700	3844600	4144400	Quantified					PF10276(Zinc-finger domain)
A0A1S3D870	Mitochondrial import inner membrane translocase subunit	LOC103513430		tr|A0A1S3D870|A0A1S3D870_DIACI	tr|A0A1S3D870|A0A1S3D870_DIACI Mitochondrial import inner membrane translocase subunit OS=Diaphorina citri OX=121845 GN=LOC103513430 PE=3 SV=1	1	2	2	2	30.3	11.32		74402	19061		5074.9	19687	Quantified	GO:0045039(BP:protein import into mitochondrial inner membrane);GO:0042719(CC:mitochondrial intermembrane space protein transporter complex);GO:0046872(MF:metal ion binding)			Mitochondrion inner membrane;Peripheral membrane protein;Intermembrane side	PF02953(Tim10/DDP family zinc finger)
A0A1S3DS49	Eukaryotic translation initiation factor 4C	LOC103523757	FUNCTION: Seems to be required for maximal rate of protein biosynthesis. Enhances ribosome dissociation into subunits and stabilizes the binding of the initiator Met-tRNA(I) to 40 S ribosomal subunits. {ECO:0000256|RuleBase:RU004365}.	tr|A0A1S3DS49|A0A1S3DS49_DIACI;tr|A0A1S3D896|A0A1S3D896_DIACI	tr|A0A1S3DS49|A0A1S3DS49_DIACI Eukaryotic translation initiation factor 4C OS=Diaphorina citri OX=121845 GN=LOC103523757 PE=3 SV=1;tr|A0A1S3D896|A0A1S3D896_DIACI Eukaryotic translation initiation factor 4C OS=Diaphorina citri OX=121845 GN=LOC103513464 PE=3	2	2	2	2	16.6	16.717	331430	295450	151370	242740	161570	219920	Quantified	GO:0003743(MF:translation initiation factor activity)				PF01176(Translation initiation factor 1A / IF-1)
A0A1S3D899	Microtubule-associated protein RP/EB family member 1 isoform X3	LOC103513470		tr|A0A1S3D899|A0A1S3D899_DIACI;tr|A0A1S3D9R5|A0A1S3D9R5_DIACI;tr|A0A1S3D8A2|A0A1S3D8A2_DIACI	tr|A0A1S3D899|A0A1S3D899_DIACI Microtubule-associated protein RP/EB family member 1 isoform X3 OS=Diaphorina citri OX=121845 GN=LOC103513470 PE=4 SV=1;tr|A0A1S3D9R5|A0A1S3D9R5_DIACI Microtubule-associated protein RP/EB family member 3 isoform X2 OS=Diaphor	3	4	4	4	24.9	23.964	872200	821570	828890	1471300	959030	1096700	Quantified	GO:0005874(CC:microtubule);GO:0008017(MF:microtubule binding)				PF03271(EB1-like C-terminal motif)
A0A1S3D8B1	Vitellogenin-1-like	LOC103513496		tr|A0A1S3D8B1|A0A1S3D8B1_DIACI	tr|A0A1S3D8B1|A0A1S3D8B1_DIACI Vitellogenin-1-like OS=Diaphorina citri OX=121845 GN=LOC103513496 PE=4 SV=1	1	6	2	2	55	8.9852	70885	57726		207490	99284	350720	Quantified
A0A1S3D8C1	Small nuclear ribonucleoprotein Sm D2	LOC103513502		tr|A0A1S3D8C1|A0A1S3D8C1_DIACI	tr|A0A1S3D8C1|A0A1S3D8C1_DIACI Small nuclear ribonucleoprotein Sm D2 OS=Diaphorina citri OX=121845 GN=LOC103513502 PE=3 SV=1	1	1	1	1	19.1	12.658	261350	22921	3801.7	23902	34729	7107.2	Quantified	GO:0006397(BP:mRNA processing);GO:0008380(BP:RNA splicing);GO:0030532(CC:small nuclear ribonucleoprotein complex)			Cytoplasm;cytosol;Nucleus	PF01423(LSM domain)
A0A1S3D8D4	Triokinase/FMN cyclase	LOC103512699		tr|A0A1S3D8D4|A0A1S3D8D4_DIACI	tr|A0A1S3D8D4|A0A1S3D8D4_DIACI Triokinase/FMN cyclase OS=Diaphorina citri OX=121845 GN=LOC103512699 PE=4 SV=2	1	6	6	6	23.6	44.349	194150	246730	307440	262180	410310	363580	Quantified	GO:0006071(BP:glycerol metabolic process);GO:0004371(MF:glycerone kinase activity)				PF02734(DAK2 domain);PF02733(Dak1 domain)
A0A1S3D8D9	Uncharacterized protein LOC103512709	LOC103512709		tr|A0A1S3D8D9|A0A1S3D8D9_DIACI	tr|A0A1S3D8D9|A0A1S3D8D9_DIACI Uncharacterized protein LOC103512709 OS=Diaphorina citri OX=121845 GN=LOC103512709 PE=4 SV=1	1	1	1	1	3.6	32.127	103700		9067.7	4549.4	8765.9		Quantified
A0A1S3D8E8	Eukaryotic translation initiation factor 2 subunit 3-like	LOC103513433		tr|A0A1S3D8E8|A0A1S3D8E8_DIACI	tr|A0A1S3D8E8|A0A1S3D8E8_DIACI Eukaryotic translation initiation factor 2 subunit 3-like OS=Diaphorina citri OX=121845 GN=LOC103513433 PE=4 SV=1	1	4	2	2	33.5	21.961	180040	151720	315690	394400	137960	204260	Quantified	GO:0005525(MF:GTP binding);GO:0003924(MF:GTPase activity);GO:0003743(MF:translation initiation factor activity)				PF00009(Elongation factor Tu GTP binding domain)
A0A1S3D8F5	Carboxylic ester hydrolase	LOC103513553		tr|A0A1S3D8F5|A0A1S3D8F5_DIACI;tr|A0A3Q0JIX9|A0A3Q0JIX9_DIACI	tr|A0A1S3D8F5|A0A1S3D8F5_DIACI Carboxylic ester hydrolase OS=Diaphorina citri OX=121845 GN=LOC103513553 PE=3 SV=1	2	15	15	10	27.7	72.634	2991400	5685300	6516800	2762500	4196600	4404200	Quantified	GO:0016787(MF:hydrolase activity)				PF00135(Carboxylesterase family)
A0A1S3D8G0	Troponin I-like	LOC103513560		tr|A0A1S3D8G0|A0A1S3D8G0_DIACI;tr|Q0PXW0|Q0PXW0_DIACI	tr|A0A1S3D8G0|A0A1S3D8G0_DIACI Troponin I-like OS=Diaphorina citri OX=121845 GN=LOC103513560 PE=4 SV=1;tr|Q0PXW0|Q0PXW0_DIACI Putative troponin I OS=Diaphorina citri OX=121845 GN=LOC103522353 PE=2 SV=1	2	11	9	9	43.4	17.052	14386000	13223000	12830000	19507000	13509000	14088000	Quantified	GO:0005861(CC:troponin complex)				PF00992(Troponin)
A0A1S3D8G3	Uncharacterized protein LOC103513455	LOC103513455		tr|A0A1S3D8G3|A0A1S3D8G3_DIACI	tr|A0A1S3D8G3|A0A1S3D8G3_DIACI Uncharacterized protein LOC103513455 OS=Diaphorina citri OX=121845 GN=LOC103513455 PE=4 SV=1	1	2	2	2	9.6	13.541	593530	1009800	2365400	1054100	2197900	3369700	Quantified
A0A1S3D8G9	Small ribosomal subunit protein eS28	LOC103513573		tr|A0A1S3D8G9|A0A1S3D8G9_DIACI	tr|A0A1S3D8G9|A0A1S3D8G9_DIACI Small ribosomal subunit protein eS28 OS=Diaphorina citri OX=121845 GN=LOC103513573 PE=3 SV=1	1	2	2	2	32.3	7.3775	2428400	1837100	1317900	2716800	1756300	2021000	Quantified	GO:0006412(BP:translation);GO:0005840(CC:ribosome);GO:0003735(MF:structural constituent of ribosome)				PF01200(Ribosomal protein S28e)
A0A1S3D8H4	Uncharacterized protein LOC103513571	LOC103513571		tr|A0A1S3D8H4|A0A1S3D8H4_DIACI	tr|A0A1S3D8H4|A0A1S3D8H4_DIACI Uncharacterized protein LOC103513571 OS=Diaphorina citri OX=121845 GN=LOC103513571 PE=4 SV=1	1	2	2	2	10.3	23.409	870350	685000	569910	664110	594900	540430	Quantified
A0A1S3D8H7	Uncharacterized protein LOC103513466	LOC103513466		tr|A0A1S3D8H7|A0A1S3D8H7_DIACI	tr|A0A1S3D8H7|A0A1S3D8H7_DIACI Uncharacterized protein LOC103513466 OS=Diaphorina citri OX=121845 GN=LOC103513466 PE=4 SV=1	1	1	1	1	0.8	142	538160	1156800	1166600	1021500	1488800	1562000	Quantified					PF04843(Herpesvirus tegument protein, N-terminal conserved region);PF14214(Helitron helicase-like domain at N-terminus)
A0A1S3D8I5	Alpha-soluble NSF attachment protein-like	LOC103513582	FUNCTION: Required for vesicular transport between the endoplasmic reticulum and the Golgi apparatus. {ECO:0000256|RuleBase:RU367013}.	tr|A0A1S3D8I5|A0A1S3D8I5_DIACI	tr|A0A1S3D8I5|A0A1S3D8I5_DIACI Alpha-soluble NSF attachment protein-like OS=Diaphorina citri OX=121845 GN=LOC103513582 PE=3 SV=2	1	2	2	2	12.4	21.498	141430	2498.2	101540	7601.1	87206	75107	Quantified	GO:0006886(BP:intracellular protein transport)			Membrane;Peripheral membrane protein	PF14938(Soluble NSF attachment protein, SNAP)
A0A1S3D8L3	Proteasome subunit alpha type-4-like	LOC103513627		tr|A0A1S3D8L3|A0A1S3D8L3_DIACI;tr|A0A1S3DE06|A0A1S3DE06_DIACI	tr|A0A1S3D8L3|A0A1S3D8L3_DIACI Proteasome subunit alpha type-4-like OS=Diaphorina citri OX=121845 GN=LOC103513627 PE=4 SV=1;tr|A0A1S3DE06|A0A1S3DE06_DIACI Proteasome subunit alpha type-4-like OS=Diaphorina citri OX=121845 GN=LOC103516856 PE=4 SV=1	2	2	2	2	40	6.6464	216440	174700	181190	461950	223320	233990	Quantified	GO:0000502(CC:proteasome complex)
A0A1S4EGR0	Endothelial differentiation-related factor 1 homolog	LOC103513644		tr|A0A1S4EGR0|A0A1S4EGR0_DIACI;tr|A0A1S3D8M3|A0A1S3D8M3_DIACI	tr|A0A1S4EGR0|A0A1S4EGR0_DIACI Endothelial differentiation-related factor 1 homolog OS=Diaphorina citri OX=121845 GN=LOC103513644 PE=4 SV=1;tr|A0A1S3D8M3|A0A1S3D8M3_DIACI Endothelial differentiation-related factor 1 homolog OS=Diaphorina citri OX=121845 GN	2	1	1	1	11.6	14.294	125820	112350	75445	147920	82969	102950	Quantified	GO:0003677(MF:DNA binding)				PF08523(Multiprotein bridging factor 1);PF01381(Helix-turn-helix)
A0A1S3D8M9	Uncharacterized protein LOC103513652	LOC103513652		tr|A0A1S3D8M9|A0A1S3D8M9_DIACI	tr|A0A1S3D8M9|A0A1S3D8M9_DIACI Uncharacterized protein LOC103513652 OS=Diaphorina citri OX=121845 GN=LOC103513652 PE=4 SV=1	1	2	1	1	11.1	32.963	212760	14408	12503	36559		7021.7	Quantified	GO:0005576(CC:extracellular region);GO:0008061(MF:chitin binding)				PF01607(Chitin binding Peritrophin-A domain)
A0A1S3D8N7	Dual specificity protein phosphatase	LOC103512884	FUNCTION: Dual specificity phosphatase able to dephosphorylate phosphotyrosine, phosphoserine and phosphothreonine residues, with a preference for phosphotyrosine as a substrate. {ECO:0000256|RuleBase:RU366038}.	tr|A0A1S3D8N7|A0A1S3D8N7_DIACI	tr|A0A1S3D8N7|A0A1S3D8N7_DIACI Dual specificity protein phosphatase OS=Diaphorina citri OX=121845 GN=LOC103512884 PE=3 SV=1	1	5	5	5	50.3	16.297	109870	93784	112420	224300	101800	71911	Quantified	GO:0004725(MF:protein tyrosine phosphatase activity);GO:0008138(MF:protein tyrosine/serine/threonine phosphatase activity)				PF00782(Dual specificity phosphatase, catalytic domain)
A0A1S3D8P5	Polypeptide N-acetylgalactosaminyltransferase 9	LOC103513664		tr|A0A1S3D8P5|A0A1S3D8P5_DIACI	tr|A0A1S3D8P5|A0A1S3D8P5_DIACI Polypeptide N-acetylgalactosaminyltransferase 9 OS=Diaphorina citri OX=121845 GN=LOC103513664 PE=4 SV=2	1	1	1	1	6.9	26.74	40153	33786		71081		49451	Quantified	GO:0016021(CC:integral component of membrane);GO:0016740(MF:transferase activity)				PF00535(Glycosyl transferase family 2)
A0A1S3D8P7	Solute carrier family 12 member 4-like	LOC103512913		tr|A0A1S3D8P7|A0A1S3D8P7_DIACI	tr|A0A1S3D8P7|A0A1S3D8P7_DIACI Solute carrier family 12 member 4-like OS=Diaphorina citri OX=121845 GN=LOC103512913 PE=4 SV=1	1	6	2	2	12	86.317	65555	67658	72432	81184	86546	86645	Quantified	GO:0071477(BP:cellular hypotonic salinity response);GO:0005887(CC:integral component of plasma membrane);GO:0015379(MF:potassium:chloride symporter activity)			Membrane;Multi-pass membrane protein	PF00324(Amino acid permease);PF03522(Solute carrier family 12)
A0A1S4EQX1	Uncharacterized protein LOC103522735	LOC103522735		tr|A0A1S4EQX1|A0A1S4EQX1_DIACI;tr|A0A1S3D8Q0|A0A1S3D8Q0_DIACI	tr|A0A1S4EQX1|A0A1S4EQX1_DIACI Uncharacterized protein LOC103522735 OS=Diaphorina citri OX=121845 GN=LOC103522735 PE=4 SV=1;tr|A0A1S3D8Q0|A0A1S3D8Q0_DIACI Uncharacterized protein LOC103513672 isoform X1 OS=Diaphorina citri OX=121845 GN=LOC103513672 PE=4 SV	2	2	2	2	18.5	12.749	117250	124740	145350	177480	156220	163440	Quantified	GO:0016021(CC:integral component of membrane)
A0A1S3D8Q2	RPB5 homolog	LOC103513569		tr|A0A1S3D8Q2|A0A1S3D8Q2_DIACI	tr|A0A1S3D8Q2|A0A1S3D8Q2_DIACI RPB5 homolog OS=Diaphorina citri OX=121845 GN=LOC103513569 PE=3 SV=1	1	1	1	1	7.2	27.277	42084	38354	31127	33935	33640	40668	Quantified	GO:0006351(BP:transcription, DNA-templated);GO:0042025(CC:host cell nucleus);GO:0003677(MF:DNA binding);GO:0003899(MF:DNA-directed 5'-3' RNA polymerase activity)			Nucleus	PF03871(RNA polymerase Rpb5, N-terminal domain);PF01191(RNA polymerase Rpb5, C-terminal domain)
A0A3Q0J5T3	Glucose dehydrogenase [FAD, quinone] isoform X1	LOC103512943		tr|A0A3Q0J5T3|A0A3Q0J5T3_DIACI;tr|A0A1S3D8R6|A0A1S3D8R6_DIACI	tr|A0A3Q0J5T3|A0A3Q0J5T3_DIACI Glucose dehydrogenase [FAD, quinone] isoform X1 OS=Diaphorina citri OX=121845 GN=LOC103512943 PE=3 SV=1;tr|A0A1S3D8R6|A0A1S3D8R6_DIACI Glucose dehydrogenase [FAD, quinone] isoform X2 OS=Diaphorina citri OX=121845 GN=LOC103512	2	2	2	2	4.7	56.946	34005	69102	49431	17302	38247	39785	Quantified	GO:0050660(MF:flavin adenine dinucleotide binding);GO:0016614(MF:oxidoreductase activity, acting on CH-OH group of donors)				PF05199(GMC oxidoreductase);PF00732(GMC oxidoreductase)
A0A1S3D8R7	DnaJ homolog subfamily A member 1 isoform X1	LOC103513585		tr|A0A1S3D8R7|A0A1S3D8R7_DIACI;tr|A0A1S4EGN3|A0A1S4EGN3_DIACI;tr|A0A3Q0JF56|A0A3Q0JF56_DIACI	tr|A0A1S3D8R7|A0A1S3D8R7_DIACI DnaJ homolog subfamily A member 1 isoform X1 OS=Diaphorina citri OX=121845 GN=LOC103513585 PE=3 SV=1;tr|A0A1S4EGN3|A0A1S4EGN3_DIACI DnaJ homolog subfamily A member 1 isoform X3 OS=Diaphorina citri OX=121845 GN=LOC103513585 PE	3	14	14	13	49.8	44.618	719640	655690	573390	754930	750330	667090	Quantified	GO:0006457(BP:protein folding);GO:0009408(BP:response to heat);GO:0005524(MF:ATP binding);GO:0031072(MF:heat shock protein binding);GO:0046872(MF:metal ion binding);GO:0051082(MF:unfolded protein binding)			Membrane;Lipid-anchor	PF01556(DnaJ C terminal domain);PF00226(DnaJ domain);PF00684(DnaJ central domain)
A0A1S3D8S4	Calmodulin-A-like	LOC103513726	FUNCTION: May be involved in calcium-mediated signal transduction. {ECO:0000256|RuleBase:RU367017}.	tr|A0A1S3D8S4|A0A1S3D8S4_DIACI	tr|A0A1S3D8S4|A0A1S3D8S4_DIACI Calmodulin-A-like OS=Diaphorina citri OX=121845 GN=LOC103513726 PE=4 SV=1	1	3	2	2	22.1	16.861	53197	7893.8	13848		2313.2	6178.7	Quantified	GO:0019722(BP:calcium-mediated signaling);GO:0005509(MF:calcium ion binding)				PF13499(EF-hand domain pair)
A0A1S3D8S7	Protein anoxia up-regulated	LOC103513598		tr|A0A1S3D8S7|A0A1S3D8S7_DIACI	tr|A0A1S3D8S7|A0A1S3D8S7_DIACI Protein anoxia up-regulated OS=Diaphorina citri OX=121845 GN=LOC103513598 PE=4 SV=1	1	5	5	5	44.7	12.442	6041800	4056700	3995600	4442800	4586800	4170800	Quantified
A0A1S3D8T0	Cytochrome c oxidase subunit 6B	LOC103513747		tr|A0A1S3D8T0|A0A1S3D8T0_DIACI	tr|A0A1S3D8T0|A0A1S3D8T0_DIACI Cytochrome c oxidase subunit 6B OS=Diaphorina citri OX=121845 GN=LOC103513747 PE=4 SV=1	1	3	3	3	36.8	12.423	32752	67243	28457	221070	29368	43463	Quantified	GO:0005739(CC:mitochondrion)				PF02297(Cytochrome oxidase c subunit VIb)
A0A1S3D8U2	Alpha-N-acetylglucosaminidase-like	LOC103513622		tr|A0A1S3D8U2|A0A1S3D8U2_DIACI	tr|A0A1S3D8U2|A0A1S3D8U2_DIACI Alpha-N-acetylglucosaminidase-like OS=Diaphorina citri OX=121845 GN=LOC103513622 PE=4 SV=1	1	2	1	1	33	9.9391	68494	72315	74417	113720	69842	73196	Quantified					PF12972(Alpha-N-acetylglucosaminidase (NAGLU) C-terminal domain)
A0A1S3D8U7	signal peptidase I	LOC103513626		tr|A0A1S3D8U7|A0A1S3D8U7_DIACI	tr|A0A1S3D8U7|A0A1S3D8U7_DIACI signal peptidase I OS=Diaphorina citri OX=121845 GN=LOC103513626 PE=3 SV=1	1	3	3	1	25.2	11.737	202170	199750	218390	298890	250910	284580	Quantified	GO:0006465(BP:signal peptide processing);GO:0016021(CC:integral component of membrane);GO:0005787(CC:signal peptidase complex);GO:0008236(MF:serine-type peptidase activity)			Endoplasmic reticulum membrane;Single-pass type II membrane protein;Membrane	PF00717(Peptidase S24-like)
A0A1S3D8V0	Glutaredoxin-3-like	LOC103513771		tr|A0A1S3D8V0|A0A1S3D8V0_DIACI	tr|A0A1S3D8V0|A0A1S3D8V0_DIACI Glutaredoxin-3-like OS=Diaphorina citri OX=121845 GN=LOC103513771 PE=4 SV=1	1	3	3	3	31.1	15.386	714500	590090	539680	787940	541850	506820	Quantified	GO:0045454(BP:cell redox homeostasis);GO:0005623(CC:cell)				PF00085(Thioredoxin)
A0A1S3D8W4	Geranylgeranyl transferase type-2 subunit alpha	LOC103513795		tr|A0A1S3D8W4|A0A1S3D8W4_DIACI;tr|A0A3Q0J7M8|A0A3Q0J7M8_DIACI	tr|A0A1S3D8W4|A0A1S3D8W4_DIACI Geranylgeranyl transferase type-2 subunit alpha OS=Diaphorina citri OX=121845 GN=LOC103513795 PE=3 SV=1;tr|A0A3Q0J7M8|A0A3Q0J7M8_DIACI Geranylgeranyl transferase type-2 subunit alpha OS=Diaphorina citri OX=121845 GN=LOC103513	2	3	3	3	10.1	61.901	38476	72557	80633	50988	51447	46570	Quantified	GO:0018344(BP:protein geranylgeranylation);GO:0005968(CC:Rab-protein geranylgeranyltransferase complex);GO:0008318(MF:protein prenyltransferase activity)				PF01239(Protein prenyltransferase alpha subunit repeat)
A0A1S3D8W9	gamma-glutamylcyclotransferase	LOC103513801		tr|A0A1S3D8W9|A0A1S3D8W9_DIACI;tr|A0A3Q0JJG7|A0A3Q0JJG7_DIACI	tr|A0A1S3D8W9|A0A1S3D8W9_DIACI gamma-glutamylcyclotransferase OS=Diaphorina citri OX=121845 GN=LOC103513801 PE=4 SV=1	2	4	4	4	36.2	24.875	460180	488930	384980	210640	335560	303940	Quantified	GO:0003839(MF:gamma-glutamylcyclotransferase activity);GO:0016740(MF:transferase activity)				PF13772(AIG2-like family)
A0A1S3D8X3	LOW QUALITY PROTEIN: endoplasmic reticulum chaperone BiP-like	LOC103513817		tr|A0A1S3D8X3|A0A1S3D8X3_DIACI;tr|A0A3Q0J2J1|A0A3Q0J2J1_DIACI	tr|A0A1S3D8X3|A0A1S3D8X3_DIACI LOW QUALITY PROTEIN: endoplasmic reticulum chaperone BiP-like OS=Diaphorina citri OX=121845 GN=LOC103513817 PE=3 SV=2	2	30	30	27	48.9	72.608	23401000	17377000	16922000	20761000	16052000	17470000	Quantified	GO:0005524(MF:ATP binding)	K04043(NA)	ko03018(RNA degradation)	Endoplasmic reticulum lumen	PF00012(Hsp70 protein)
A0A1S3D8Y2	26S proteasome non-ATPase regulatory subunit 13	LOC103513835		tr|A0A1S3D8Y2|A0A1S3D8Y2_DIACI	tr|A0A1S3D8Y2|A0A1S3D8Y2_DIACI 26S proteasome non-ATPase regulatory subunit 13 OS=Diaphorina citri OX=121845 GN=LOC103513835 PE=4 SV=1	1	10	10	10	36.1	44.064	311010	465570	378980	393000	439630	567660	Quantified	GO:0000502(CC:proteasome complex)				PF01399(PCI domain)
A0A3Q0J756	Uncharacterized protein LOC103513879 isoform X3	LOC103513879		tr|A0A3Q0J756|A0A3Q0J756_DIACI;tr|A0A1S3D911|A0A1S3D911_DIACI	tr|A0A3Q0J756|A0A3Q0J756_DIACI Uncharacterized protein LOC103513879 isoform X3 OS=Diaphorina citri OX=121845 GN=LOC103513879 PE=4 SV=1;tr|A0A1S3D911|A0A1S3D911_DIACI Uncharacterized protein LOC103513879 isoform X1 OS=Diaphorina citri OX=121845 GN=LOC103513	2	3	3	3	17.6	28.024	180760	182230	361200	100200	184650	320590	Quantified
A0A1S3D915	Uncharacterized protein LOC103513887	LOC103513887		tr|A0A1S3D915|A0A1S3D915_DIACI;tr|A0A3Q0J766|A0A3Q0J766_DIACI	tr|A0A1S3D915|A0A1S3D915_DIACI Uncharacterized protein LOC103513887 OS=Diaphorina citri OX=121845 GN=LOC103513887 PE=4 SV=1	2	9	9	9	62.5	27.401	949530	1110400	1129800	1186500	1005100	987750	Quantified	GO:0016491(MF:oxidoreductase activity)	K00059(NA)	ko00061(Fatty acid biosynthesis);ko00333(Prodigiosin biosynthesis);ko00780(Biotin metabolism);ko01240(Biosynthesis of cofactors)		PF13561(Enoyl-(Acyl carrier protein) reductase)
A0A1S3D918	Lysosomal Pro-X carboxypeptidase-like	LOC103513849		tr|A0A1S3D918|A0A1S3D918_DIACI	tr|A0A1S3D918|A0A1S3D918_DIACI Lysosomal Pro-X carboxypeptidase-like OS=Diaphorina citri OX=121845 GN=LOC103513849 PE=3 SV=1	1	4	4	4	9.3	63.433	99555	99262	75901	196700	138130	158860	Quantified	GO:0004180(MF:carboxypeptidase activity);GO:0008236(MF:serine-type peptidase activity)				PF05577(Serine carboxypeptidase S28)
A0A1S3D923	Neurexin-4-like	LOC103513882		tr|A0A1S3D923|A0A1S3D923_DIACI	tr|A0A1S3D923|A0A1S3D923_DIACI Neurexin-4-like OS=Diaphorina citri OX=121845 GN=LOC103513882 PE=3 SV=2	1	6	1	1	20.1	42.801		55209	71139	3088.6	67354	43007	Quantified	GO:0016021(CC:integral component of membrane)				PF00008(EGF-like domain);PF02210(Laminin G domain)
A0A1S3D925	X-ray repair cross-complementing protein 5-like	LOC103513911		tr|A0A1S3D925|A0A1S3D925_DIACI	tr|A0A1S3D925|A0A1S3D925_DIACI X-ray repair cross-complementing protein 5-like OS=Diaphorina citri OX=121845 GN=LOC103513911 PE=4 SV=1	1	2	2	2	6.3	60.61	45910	31891	63548	173290	71146	116620	Quantified	GO:0006303(BP:double-strand break repair via nonhomologous end joining);GO:0003677(MF:DNA binding)			Nucleus	PF03731(Ku70/Ku80 N-terminal alpha/beta domain);PF02735(Ku70/Ku80 beta-barrel domain)
A0A1S3D934	Uncharacterized protein LOC103513901	LOC103513901		tr|A0A1S3D934|A0A1S3D934_DIACI	tr|A0A1S3D934|A0A1S3D934_DIACI Uncharacterized protein LOC103513901 OS=Diaphorina citri OX=121845 GN=LOC103513901 PE=4 SV=2	1	2	2	2	49	10.537	95817	116340	94638			80037	Quantified	GO:0009890(BP:negative regulation of biosynthetic process)				PF06399(GTP cyclohydrolase I feedback regulatory protein (GFRP))
A0A1S3D941	Uncharacterized protein LOC103513128	LOC103513128		tr|A0A1S3D941|A0A1S3D941_DIACI	tr|A0A1S3D941|A0A1S3D941_DIACI Uncharacterized protein LOC103513128 OS=Diaphorina citri OX=121845 GN=LOC103513128 PE=4 SV=2	1	1	1	1	6.3	46.787		157360		185970		160100	Quantified					PF00169(PH domain)
A0A1S3D948	Heat shock protein 70 A1-like isoform X2	LOC103513939		tr|A0A1S3D948|A0A1S3D948_DIACI;tr|A0A1S3DAN2|A0A1S3DAN2_DIACI;tr|A0A1S3D964|A0A1S3D964_DIACI;tr|A0A3Q0IVR3|A0A3Q0IVR3_DIACI;tr|A0A1S3DAP3|A0A1S3DAP3_DIACI;tr|A0A1S3D3Y1|A0A1S3D3Y1_DIACI;tr|A0A1S3D970|A0A1S3D970_DIACI;tr|C5NS96|C5NS96_DIACI;tr|A0A1S3DT18|A0A1S3DT18_DIACI	tr|A0A1S3D948|A0A1S3D948_DIACI Heat shock protein 70 A1-like isoform X2 OS=Diaphorina citri OX=121845 GN=LOC103513939 PE=3 SV=1;tr|A0A1S3DAN2|A0A1S3DAN2_DIACI Heat shock protein 70 A1-like OS=Diaphorina citri OX=121845 GN=LOC103513939 PE=3 SV=1;tr|A0A1S3D9	9	13	10	10	25.4	68.977	2012000	1417200	1221300	1018400	875390	800460	Quantified	GO:0005524(MF:ATP binding)	K04043(NA)	ko03018(RNA degradation)		PF00012(Hsp70 protein)
A0A1S3D965	NADP-dependent malic enzyme-like	LOC103513943		tr|A0A1S3D965|A0A1S3D965_DIACI	tr|A0A1S3D965|A0A1S3D965_DIACI NADP-dependent malic enzyme-like OS=Diaphorina citri OX=121845 GN=LOC103513943 PE=4 SV=2	1	4	4	4	27.7	15.712	1736600	916350	1378600	1623800	2287400	2396800	Quantified
A0A1S3D966	Uncharacterized protein LOC103513825 isoform X1	LOC103513825		tr|A0A1S3D966|A0A1S3D966_DIACI	tr|A0A1S3D966|A0A1S3D966_DIACI Uncharacterized protein LOC103513825 isoform X1 OS=Diaphorina citri OX=121845 GN=LOC103513825 PE=4 SV=1	1	3	3	3	45	11.044	1028500	720160	617190	758620	619700	578990	Quantified
A0A1S3D977	Protein quiver	LOC103513974		tr|A0A1S3D977|A0A1S3D977_DIACI	tr|A0A1S3D977|A0A1S3D977_DIACI Protein quiver OS=Diaphorina citri OX=121845 GN=LOC103513974 PE=3 SV=1	1	1	1	1	8.8	17.933	18111	26002	36988		23276	24933	Quantified				Cell membrane;Lipid-anchor;GPI-anchor;Membrane
A0A1S3D983	LOW QUALITY PROTEIN: protein kinase C and casein kinase substrate in neurons protein 1-like	LOC103513191		tr|A0A1S3D983|A0A1S3D983_DIACI	tr|A0A1S3D983|A0A1S3D983_DIACI LOW QUALITY PROTEIN: protein kinase C and casein kinase substrate in neurons protein 1-like OS=Diaphorina citri OX=121845 GN=LOC103513191 PE=4 SV=2	1	3	2	2	11	36.662	283370	279770	169070		186620	209950	Quantified	GO:0016301(MF:kinase activity)				PF00611(Fes/CIP4, and EFC/F-BAR homology domain)
A0A1S3D990	Apyrase	LOC103513970		tr|A0A1S3D990|A0A1S3D990_DIACI;tr|A0A3Q0JMK1|A0A3Q0JMK1_DIACI	tr|A0A1S3D990|A0A1S3D990_DIACI Apyrase OS=Diaphorina citri OX=121845 GN=LOC103513970 PE=3 SV=2	2	8	8	8	25.2	47.644	335650	298120	386310	307880	227920	231020	Quantified	GO:0009166(BP:nucleotide catabolic process);GO:0016787(MF:hydrolase activity);GO:0000166(MF:nucleotide binding)				PF02872(5'-nucleotidase, C-terminal domain)
A0A1S3D9A6	Guanine nucleotide-binding protein subunit beta-2 isoform X1	LOC103513214		tr|A0A1S3D9A6|A0A1S3D9A6_DIACI	tr|A0A1S3D9A6|A0A1S3D9A6_DIACI Guanine nucleotide-binding protein subunit beta-2 isoform X1 OS=Diaphorina citri OX=121845 GN=LOC103513214 PE=3 SV=1	1	8	8	8	29.3	38.257	199700	252980	476580	107680	38408	175350	Quantified	GO:0007165(BP:signal transduction)				PF00400(WD domain, G-beta repeat)
A0A1S3D9B1	Ethanolamine kinase	LOC103513219		tr|A0A1S3D9B1|A0A1S3D9B1_DIACI	tr|A0A1S3D9B1|A0A1S3D9B1_DIACI Ethanolamine kinase OS=Diaphorina citri OX=121845 GN=LOC103513219 PE=4 SV=1	1	2	2	2	21.6	13.511	107040	52541	106580	15957	73517	81303	Quantified	GO:0016301(MF:kinase activity)				PF01633(Choline/ethanolamine kinase)
A0A1S3D9B9	Cuticle protein 12.5-like isoform X1	LOC103514025		tr|A0A1S3D9B9|A0A1S3D9B9_DIACI;tr|A0A3Q0J320|A0A3Q0J320_DIACI	tr|A0A1S3D9B9|A0A1S3D9B9_DIACI Cuticle protein 12.5-like isoform X1 OS=Diaphorina citri OX=121845 GN=LOC103514025 PE=4 SV=1;tr|A0A3Q0J320|A0A3Q0J320_DIACI Cuticle protein 12.5-like isoform X2 OS=Diaphorina citri OX=121845 GN=LOC103514025 PE=4 SV=1	2	7	7	7	47.7	20.508	2661100	2337300	1799900	587340	879380	669130	Quantified
A0A1S3D9C2	NADH dehydrogenase [ubiquinone] 1 beta subcomplex subunit 4	LOC103514037		tr|A0A1S3D9C2|A0A1S3D9C2_DIACI	tr|A0A1S3D9C2|A0A1S3D9C2_DIACI NADH dehydrogenase [ubiquinone] 1 beta subcomplex subunit 4 OS=Diaphorina citri OX=121845 GN=LOC103514037 PE=3 SV=1	1	3	3	3	40	13.595	364550	1193300	785770	869510	900820	1028400	Quantified	GO:0016021(CC:integral component of membrane);GO:0005739(CC:mitochondrion);GO:0008137(MF:NADH dehydrogenase (ubiquinone) activity)				PF07225(NADH-ubiquinone oxidoreductase B15 subunit (NDUFB4))
A0A1S3D9D8	phosphoribosylaminoimidazolesuccinocarboxamide synthase	LOC103514080		tr|A0A1S3D9D8|A0A1S3D9D8_DIACI	tr|A0A1S3D9D8|A0A1S3D9D8_DIACI phosphoribosylaminoimidazolesuccinocarboxamide synthase OS=Diaphorina citri OX=121845 GN=LOC103514080 PE=4 SV=1	1	6	6	6	47	23.086	417200	606320	441670	451920	483770	510610	Quantified	GO:0006164(BP:purine nucleotide biosynthetic process);GO:0004639(MF:phosphoribosylaminoimidazolesuccinocarboxamide synthase activity)	K01923(NA)	ko00230(Purine metabolism)		PF01259(SAICAR synthetase)
A0A1S3D9E0	Mitochondrial uncoupling protein 4 isoform X1	LOC103513274		tr|A0A1S3D9E0|A0A1S3D9E0_DIACI;tr|A0A1S4EGC0|A0A1S4EGC0_DIACI;tr|A0A1S3DSZ7|A0A1S3DSZ7_DIACI	tr|A0A1S3D9E0|A0A1S3D9E0_DIACI Mitochondrial uncoupling protein 4 isoform X1 OS=Diaphorina citri OX=121845 GN=LOC103513274 PE=3 SV=1;tr|A0A1S4EGC0|A0A1S4EGC0_DIACI Mitochondrial uncoupling protein 4 isoform X2 OS=Diaphorina citri OX=121845 GN=LOC103513274	3	3	3	3	14.6	35.21		14732	36443	125600	61528	187570	Quantified	GO:0006839(BP:mitochondrial transport);GO:0016021(CC:integral component of membrane);GO:0031966(CC:mitochondrial membrane)			Membrane;Multi-pass membrane protein	PF00153(Mitochondrial carrier protein)
A0A1S3D9F2	Protein yellow-like	LOC103513958		tr|A0A1S3D9F2|A0A1S3D9F2_DIACI;tr|A0A3Q0JEP4|A0A3Q0JEP4_DIACI	tr|A0A1S3D9F2|A0A1S3D9F2_DIACI Protein yellow-like OS=Diaphorina citri OX=121845 GN=LOC103513958 PE=3 SV=1	2	8	8	6	20.4	49.593	426300	361310	416150	254500	403510	309150	Quantified					PF15240(Proline-rich);PF03022(Major royal jelly protein)
A0A1S3D9H1	Small ribosomal subunit protein mS40	LOC103514120		tr|A0A1S3D9H1|A0A1S3D9H1_DIACI	tr|A0A1S3D9H1|A0A1S3D9H1_DIACI Small ribosomal subunit protein mS40 OS=Diaphorina citri OX=121845 GN=LOC103514120 PE=3 SV=1	1	2	2	2	11.2	24.859	48450	46893	57608	52921	32070	118670	Quantified	GO:0032543(BP:mitochondrial translation);GO:0005739(CC:mitochondrion);GO:0005840(CC:ribosome);GO:0003735(MF:structural constituent of ribosome)	K02963(NA)	ko03010(Ribosome)		PF01084(Ribosomal protein S18)
A0A1S3D9H2	alpha-L-fucosidase	LOC103514140		tr|A0A1S3D9H2|A0A1S3D9H2_DIACI;tr|A0A1S3DQJ7|A0A1S3DQJ7_DIACI	tr|A0A1S3D9H2|A0A1S3D9H2_DIACI alpha-L-fucosidase OS=Diaphorina citri OX=121845 GN=LOC103514140 PE=3 SV=1	2	18	18	18	46.2	53.753	2555600	2977000	2766700	3882500	3043000	3192500	Quantified	GO:0006004(BP:fucose metabolic process);GO:0004560(MF:alpha-L-fucosidase activity)				PF01120(Alpha-L-fucosidase);PF16757(Alpha-L-fucosidase C-terminal domain)
A0A1S3D9I6	Skin secretory protein xP2-like isoform X1	LOC103514141		tr|A0A1S3D9I6|A0A1S3D9I6_DIACI	tr|A0A1S3D9I6|A0A1S3D9I6_DIACI Skin secretory protein xP2-like isoform X1 OS=Diaphorina citri OX=121845 GN=LOC103514141 PE=4 SV=1	1	14	14	12	31.2	50.564	22677000	15830000	15389000	26004000	19007000	18077000	Quantified	GO:0005861(CC:troponin complex)				PF00992(Troponin)
A0A1S3D9J3	Syntaxin-1A-like	LOC103514014		tr|A0A1S3D9J3|A0A1S3D9J3_DIACI	tr|A0A1S3D9J3|A0A1S3D9J3_DIACI Syntaxin-1A-like OS=Diaphorina citri OX=121845 GN=LOC103514014 PE=3 SV=1	1	6	6	6	30.7	30.313	752120	811250	781220	1290300	786940	849650	Quantified	GO:0017157(BP:regulation of exocytosis);GO:0016192(BP:vesicle-mediated transport);GO:0016021(CC:integral component of membrane);GO:0000149(MF:SNARE binding)				PF05739(SNARE domain);PF00804(Syntaxin)
A0A1S3D9N5	Peroxiredoxin-6-like isoform X1	LOC103513426		tr|A0A1S3D9N5|A0A1S3D9N5_DIACI	tr|A0A1S3D9N5|A0A1S3D9N5_DIACI Peroxiredoxin-6-like isoform X1 OS=Diaphorina citri OX=121845 GN=LOC103513426 PE=4 SV=1	1	2	2	2	57.8	9.4807	89403	73447		332640	100590	86956	Quantified	GO:0045454(BP:cell redox homeostasis);GO:0005623(CC:cell);GO:0016209(MF:antioxidant activity);GO:0016491(MF:oxidoreductase activity)				PF00578(AhpC/TSA family)
A0A1S3D9P8	Lipase maturation factor	LOC103513404	FUNCTION: Involved in the maturation of specific proteins in the endoplasmic reticulum. {ECO:0000256|RuleBase:RU361229}.	tr|A0A1S3D9P8|A0A1S3D9P8_DIACI	tr|A0A1S3D9P8|A0A1S3D9P8_DIACI Lipase maturation factor OS=Diaphorina citri OX=121845 GN=LOC103513404 PE=3 SV=1	1	7	7	7	17.4	76.515	290880	407950	320540	599660	444060	438690	Quantified	GO:0005789(CC:endoplasmic reticulum membrane);GO:0016021(CC:integral component of membrane)			Endoplasmic reticulum membrane;Multi-pass membrane protein;Membrane	PF06762(Lipase maturation factor)
A0A1S3D9Q2	Uncharacterized protein LOC103514307	LOC103514307		tr|A0A1S3D9Q2|A0A1S3D9Q2_DIACI;tr|A0A1S3D9T8|A0A1S3D9T8_DIACI	tr|A0A1S3D9Q2|A0A1S3D9Q2_DIACI Uncharacterized protein LOC103514307 OS=Diaphorina citri OX=121845 GN=LOC103514307 PE=4 SV=1;tr|A0A1S3D9T8|A0A1S3D9T8_DIACI Uncharacterized protein LOC103514304 OS=Diaphorina citri OX=121845 GN=LOC103514304 PE=4 SV=1	2	2	2	2	17.2	19.291	20283	37397	24069		32342	56453	Quantified
A0A1S3D9Q3	Endoplasmic reticulum transmembrane protein	LOC103513449	FUNCTION: May play a role in anterograde transport of membrane proteins from the endoplasmic reticulum to the Golgi. {ECO:0000256|RuleBase:RU367026}.	tr|A0A1S3D9Q3|A0A1S3D9Q3_DIACI	tr|A0A1S3D9Q3|A0A1S3D9Q3_DIACI Endoplasmic reticulum transmembrane protein OS=Diaphorina citri OX=121845 GN=LOC103513449 PE=3 SV=1	1	2	2	2	16.8	25.247	48318	46846	67764			29872	Quantified	GO:0006886(BP:intracellular protein transport);GO:0005783(CC:endoplasmic reticulum);GO:0016021(CC:integral component of membrane)			Endoplasmic reticulum membrane;Multi-pass membrane protein;Membrane	PF05529(B-cell receptor-associated protein 31-like)
A0A1S3DB52	Heterogeneous nuclear ribonucleoprotein M isoform X2	LOC103514237		tr|A0A1S3DB52|A0A1S3DB52_DIACI;tr|A0A1S3D9Q4|A0A1S3D9Q4_DIACI	tr|A0A1S3DB52|A0A1S3DB52_DIACI Heterogeneous nuclear ribonucleoprotein M isoform X2 OS=Diaphorina citri OX=121845 GN=LOC103514237 PE=4 SV=1;tr|A0A1S3D9Q4|A0A1S3D9Q4_DIACI Heterogeneous nuclear ribonucleoprotein M isoform X1 OS=Diaphorina citri OX=121845 GN	2	4	4	4	15.6	46.595	367570	375410	286440	277230	260030	267070	Quantified	GO:0003723(MF:RNA binding)				PF00076(RNA recognition motif. (a.k.a. RRM, RBD, or RNP domain))
A0A1S3D9Q7	Serine/threonine-protein phosphatase	LOC103513459		tr|A0A1S3D9Q7|A0A1S3D9Q7_DIACI	tr|A0A1S3D9Q7|A0A1S3D9Q7_DIACI Serine/threonine-protein phosphatase OS=Diaphorina citri OX=121845 GN=LOC103513459 PE=3 SV=1	1	10	5	5	33.3	37.182	176140	347150	224490	282800	225680	117420	Quantified	GO:0046872(MF:metal ion binding);GO:0004721(MF:phosphoprotein phosphatase activity)				PF16891(Serine-threonine protein phosphatase N-terminal domain);PF00149(Calcineurin-like phosphoesterase)
A0A1S3D9R4	Angiotensin-converting enzyme	LOC103514272		tr|A0A1S3D9R4|A0A1S3D9R4_DIACI	tr|A0A1S3D9R4|A0A1S3D9R4_DIACI Angiotensin-converting enzyme OS=Diaphorina citri OX=121845 GN=LOC103514272 PE=3 SV=1	1	2	2	2	5	66.438	1180500	649680	430870	763110	889170	467850	Quantified	GO:0016020(CC:membrane);GO:0004180(MF:carboxypeptidase activity);GO:0046872(MF:metal ion binding);GO:0008237(MF:metallopeptidase activity);GO:0008241(MF:peptidyl-dipeptidase activity)				PF01401(Angiotensin-converting enzyme)
A0A3Q0J3S6	Serine/threonine-protein kinase 26 isoform X2	LOC103514289		tr|A0A3Q0J3S6|A0A3Q0J3S6_DIACI;tr|A0A1S3D9S4|A0A1S3D9S4_DIACI	tr|A0A3Q0J3S6|A0A3Q0J3S6_DIACI Serine/threonine-protein kinase 26 isoform X2 OS=Diaphorina citri OX=121845 GN=LOC103514289 PE=4 SV=1;tr|A0A1S3D9S4|A0A1S3D9S4_DIACI Serine/threonine-protein kinase 26 isoform X1 OS=Diaphorina citri OX=121845 GN=LOC103514289	2	2	2	2	4.7	66.474	14011	27289	11894	5976.2	8793.9	10004	Quantified	GO:0005524(MF:ATP binding);GO:0004672(MF:protein kinase activity)				PF00069(Protein kinase domain)
A0A1S3DTJ5	Protoporphyrinogen oxidase	LOC103524025	FUNCTION: Catalyzes the 6-electron oxidation of protoporphyrinogen-IX to form protoporphyrin-IX. {ECO:0000256|RuleBase:RU364052}.	tr|A0A1S3DTJ5|A0A1S3DTJ5_DIACI;tr|A0A1S3D9S5|A0A1S3D9S5_DIACI;tr|A0A1S3D9W9|A0A1S3D9W9_DIACI;tr|A0A3Q0J8V7|A0A3Q0J8V7_DIACI	tr|A0A1S3DTJ5|A0A1S3DTJ5_DIACI Protoporphyrinogen oxidase OS=Diaphorina citri OX=121845 GN=LOC103524025 PE=3 SV=2;tr|A0A1S3D9S5|A0A1S3D9S5_DIACI Protoporphyrinogen oxidase OS=Diaphorina citri OX=121845 GN=LOC103514350 PE=3 SV=1;tr|A0A1S3D9W9|A0A1S3D9W9_DIA	4	4	4	4	16.1	45.379	91254	111890	110260	181460	166090	143520	Quantified	GO:0006782(BP:protoporphyrinogen IX biosynthetic process);GO:0005743(CC:mitochondrial inner membrane);GO:0004729(MF:oxygen-dependent protoporphyrinogen oxidase activity)			Mitochondrion inner membrane	PF01593(Flavin containing amine oxidoreductase)
A0A1S3D9S7	Ragulator complex protein LAMTOR1	LOC103513491		tr|A0A1S3D9S7|A0A1S3D9S7_DIACI;tr|A0A1S4EGK3|A0A1S4EGK3_DIACI;tr|A0A1S3D8A8|A0A1S3D8A8_DIACI	tr|A0A1S3D9S7|A0A1S3D9S7_DIACI Ragulator complex protein LAMTOR1 OS=Diaphorina citri OX=121845 GN=LOC103513491 PE=3 SV=1;tr|A0A1S4EGK3|A0A1S4EGK3_DIACI Uncharacterized protein LOC103513491 isoform X2 OS=Diaphorina citri OX=121845 GN=LOC103513491 PE=4 SV=1	3	3	3	3	39	18.494	65985	64564	94710	102520	60913	62711	Quantified	GO:0071230(BP:cellular response to amino acid stimulus);GO:0042632(BP:cholesterol homeostasis);GO:0016197(BP:endosomal transport);GO:0007040(BP:lysosome organization);GO:0043410(BP:positive regulation of MAPK cascade);GO:0032008(BP:positive regulation of TOR signaling);GO:0001919(BP:regulation of receptor recycling);GO:0071986(CC:Ragulator complex)			Endosome membrane;Lipid-anchor;Cytoplasmic side;Late endosome membrane;Lysosome membrane	PF15454(Late endosomal/lysosomal adaptor and MAPK and MTOR activator)
A0A1S3D9T3	Programmed cell death protein 6-like isoform X1	LOC103513497		tr|A0A1S3D9T3|A0A1S3D9T3_DIACI	tr|A0A1S3D9T3|A0A1S3D9T3_DIACI Programmed cell death protein 6-like isoform X1 OS=Diaphorina citri OX=121845 GN=LOC103513497 PE=4 SV=1	1	6	5	5	46.8	19.888	298220	309750	334030	95493	334760	359790	Quantified	GO:0005509(MF:calcium ion binding)				PF13499(EF-hand domain pair)
A0A1S3D9T6	Titin-like	LOC103514196		tr|A0A1S3D9T6|A0A1S3D9T6_DIACI	tr|A0A1S3D9T6|A0A1S3D9T6_DIACI Titin-like OS=Diaphorina citri OX=121845 GN=LOC103514196 PE=3 SV=1	1	7	3	3	23.2	154.17	251250	225500	115510	173410	125970	16044	Quantified	GO:0008017(MF:microtubule binding)
A0A1S3D9T9	Heat shock protein 83	LOC103514323		tr|A0A1S3D9T9|A0A1S3D9T9_DIACI	tr|A0A1S3D9T9|A0A1S3D9T9_DIACI Heat shock protein 83 OS=Diaphorina citri OX=121845 GN=LOC103514323 PE=3 SV=1	1	32	32	32	62.6	74.319	5968600	5036800	4795600	5610800	2945500	4436900	Quantified	GO:0006457(BP:protein folding);GO:0005524(MF:ATP binding);GO:0051082(MF:unfolded protein binding)	K04079(NA)	ko04141(Protein processing in endoplasmic reticulum);ko04151(PI3K-Akt signaling pathway);ko04217(Necroptosis)		PF02518(Histidine kinase-, DNA gyrase B-, and HSP90-like ATPase);PF00183(Hsp90 protein)
A0A1S3D9U8	Sorting nexin-12	LOC103514182		tr|A0A1S3D9U8|A0A1S3D9U8_DIACI	tr|A0A1S3D9U8|A0A1S3D9U8_DIACI Sorting nexin-12 OS=Diaphorina citri OX=121845 GN=LOC103514182 PE=4 SV=1	1	4	4	4	31.9	19.077	373130	186850	177130	304020	156230	191770	Quantified	GO:0035091(MF:phosphatidylinositol binding)				PF00787(PX domain)
A0A1S3D9V4	Metaxin-1	LOC103514345		tr|A0A1S3D9V4|A0A1S3D9V4_DIACI	tr|A0A1S3D9V4|A0A1S3D9V4_DIACI Metaxin-1 OS=Diaphorina citri OX=121845 GN=LOC103514345 PE=4 SV=2	1	2	2	2	17.5	22.42	27994	39650	42794	83455	49797	62258	Quantified	GO:0016021(CC:integral component of membrane)				PF17171(Glutathione S-transferase, C-terminal domain)
A0A1S3D9V9	Uncharacterized protein LOC103514405 isoform X1	LOC103514405		tr|A0A1S3D9V9|A0A1S3D9V9_DIACI;tr|A0A3Q0J894|A0A3Q0J894_DIACI	tr|A0A1S3D9V9|A0A1S3D9V9_DIACI Uncharacterized protein LOC103514405 isoform X1 OS=Diaphorina citri OX=121845 GN=LOC103514405 PE=4 SV=1;tr|A0A3Q0J894|A0A3Q0J894_DIACI Uncharacterized protein LOC113469560 OS=Diaphorina citri OX=121845 GN=LOC113469560 PE=4 SV	2	5	5	5	39.2	21.786	335840	213540	355900	40700	143680	54505	Quantified
A0A1S3D9Y7	G protein-coupled receptor kinase	LOC103514397		tr|A0A1S3D9Y7|A0A1S3D9Y7_DIACI	tr|A0A1S3D9Y7|A0A1S3D9Y7_DIACI G protein-coupled receptor kinase OS=Diaphorina citri OX=121845 GN=LOC103514397 PE=3 SV=1	1	2	2	2	15.1	30.255	62033	62762	48785	76752	49311	49633	Quantified	GO:0007165(BP:signal transduction);GO:0005524(MF:ATP binding);GO:0004703(MF:G protein-coupled receptor kinase activity)				PF00069(Protein kinase domain);PF00615(Regulator of G protein signaling domain)
A0A1S3D9Z6	Zonadhesin-like	LOC103514435		tr|A0A1S3D9Z6|A0A1S3D9Z6_DIACI	tr|A0A1S3D9Z6|A0A1S3D9Z6_DIACI Zonadhesin-like OS=Diaphorina citri OX=121845 GN=LOC103514435 PE=4 SV=1	1	1	1	1	2	90.583					847.87	23250	Quantified
A0A1S3DA04	LOW QUALITY PROTEIN: uncharacterized protein LOC103513589	LOC103513589		tr|A0A1S3DA04|A0A1S3DA04_DIACI	tr|A0A1S3DA04|A0A1S3DA04_DIACI LOW QUALITY PROTEIN: uncharacterized protein LOC103513589 OS=Diaphorina citri OX=121845 GN=LOC103513589 PE=3 SV=1	1	8	8	4	20.2	45.142	842250	805600	929140	1008700	828670	879290	Quantified					PF05903(PPPDE putative peptidase domain)
A0A1S3DA08	3-ketoacyl-CoA thiolase, mitochondrial isoform X2	LOC103514425		tr|A0A1S3DA08|A0A1S3DA08_DIACI	tr|A0A1S3DA08|A0A1S3DA08_DIACI 3-ketoacyl-CoA thiolase, mitochondrial isoform X2 OS=Diaphorina citri OX=121845 GN=LOC103514425 PE=3 SV=1	1	16	1	1	61.3	41.621	108070	82508	93418	225720	229710	134270	Quantified	GO:0016747(MF:transferase activity, transferring acyl groups other than amino-acyl groups)				PF00108(Thiolase, N-terminal domain);PF02803(Thiolase, C-terminal domain)
A0A1S3DA17	Small ribosomal subunit protein mS31	LOC103514443		tr|A0A1S3DA17|A0A1S3DA17_DIACI	tr|A0A1S3DA17|A0A1S3DA17_DIACI Small ribosomal subunit protein mS31 OS=Diaphorina citri OX=121845 GN=LOC103514443 PE=3 SV=1	1	2	2	2	14.8	26.777	28474	38059	22947	19540	29054	30971	Quantified	GO:0005763(CC:mitochondrial small ribosomal subunit);GO:0003735(MF:structural constituent of ribosome)			Mitochondrion	PF15433(Mitochondrial 28S ribosomal protein S31)
A0A1S4EHV3	Peroxisomal (S)-2-hydroxy-acid oxidase GLO3-like isoform X2	LOC103514444		tr|A0A1S4EHV3|A0A1S4EHV3_DIACI;tr|A0A1S3DA23|A0A1S3DA23_DIACI	tr|A0A1S4EHV3|A0A1S4EHV3_DIACI Peroxisomal (S)-2-hydroxy-acid oxidase GLO3-like isoform X2 OS=Diaphorina citri OX=121845 GN=LOC103514444 PE=3 SV=1;tr|A0A1S3DA23|A0A1S3DA23_DIACI Peroxisomal (S)-2-hydroxy-acid oxidase GLO3-like isoform X1 OS=Diaphorina citr	2	9	9	9	47.1	41.516	278930	235910	261720	368650	340520	379610	Quantified	GO:0010181(MF:FMN binding);GO:0016491(MF:oxidoreductase activity)				PF01070(FMN-dependent dehydrogenase)
A0A1S3DA26	Keratin-associated protein 5-3-like	LOC103514453		tr|A0A1S3DA26|A0A1S3DA26_DIACI	tr|A0A1S3DA26|A0A1S3DA26_DIACI Keratin-associated protein 5-3-like OS=Diaphorina citri OX=121845 GN=LOC103514453 PE=4 SV=1	1	8	8	8	84.4	17.941	2373800	2209300	3626700	881380	1648700	1536100	Quantified
A0A1S3DA33	Isocitrate dehydrogenase [NAD] subunit, mitochondrial	LOC103514456		tr|A0A1S3DA33|A0A1S3DA33_DIACI	tr|A0A1S3DA33|A0A1S3DA33_DIACI Isocitrate dehydrogenase [NAD] subunit, mitochondrial OS=Diaphorina citri OX=121845 GN=LOC103514456 PE=3 SV=1	1	10	10	9	41.7	42.15	2664600	4405900	4660600	3904300	6074500	5596000	Quantified	GO:0006099(BP:tricarboxylic acid cycle);GO:0005739(CC:mitochondrion);GO:0004449(MF:isocitrate dehydrogenase (NAD+) activity);GO:0000287(MF:magnesium ion binding);GO:0051287(MF:NAD binding)	K00031(NA)	ko00020(Citrate cycle (TCA cycle));ko00480(Glutathione metabolism);ko00720(Carbon fixation pathways in prokaryotes);ko04146(Peroxisome)	Mitochondrion	PF00180(Isocitrate/isopropylmalate dehydrogenase)
A0A1S3DA49	Calphotin-like	LOC103514343		tr|A0A1S3DA49|A0A1S3DA49_DIACI	tr|A0A1S3DA49|A0A1S3DA49_DIACI Calphotin-like OS=Diaphorina citri OX=121845 GN=LOC103514343 PE=4 SV=1	1	3	3	3	8.2	52.895		566.07		384410			Identified
A0A1S3DA59	Uncharacterized abhydrolase domain-containing protein DDB_G0269086-like isoform X3	LOC103514494		tr|A0A1S3DA59|A0A1S3DA59_DIACI;tr|A0A1S3DA52|A0A1S3DA52_DIACI;tr|A0A1S4EHR3|A0A1S4EHR3_DIACI	tr|A0A1S3DA59|A0A1S3DA59_DIACI Uncharacterized abhydrolase domain-containing protein DDB_G0269086-like isoform X3 OS=Diaphorina citri OX=121845 GN=LOC103514494 PE=4 SV=1;tr|A0A1S3DA52|A0A1S3DA52_DIACI Uncharacterized abhydrolase domain-containing protein D	3	6	6	6	19.3	47.855	1842400	1582200	1426800	1008200	1460800	1283500	Quantified	GO:0016787(MF:hydrolase activity)
A0A1S3DA56	Zonadhesin-like	LOC103514516		tr|A0A1S3DA56|A0A1S3DA56_DIACI	tr|A0A1S3DA56|A0A1S3DA56_DIACI Zonadhesin-like OS=Diaphorina citri OX=121845 GN=LOC103514516 PE=4 SV=1	1	1	1	1	7.8	44.281				52209	3831.7	11928	Quantified
A0A1S3DA70	non-specific serine/threonine protein kinase	LOC103514570		tr|A0A1S3DA70|A0A1S3DA70_DIACI;tr|A0A3Q0J4F5|A0A3Q0J4F5_DIACI	tr|A0A1S3DA70|A0A1S3DA70_DIACI non-specific serine/threonine protein kinase OS=Diaphorina citri OX=121845 GN=LOC103514570 PE=3 SV=1;tr|A0A3Q0J4F5|A0A3Q0J4F5_DIACI non-specific serine/threonine protein kinase OS=Diaphorina citri OX=121845 GN=LOC103514574 PE	2	4	4	4	11	57.413	52908	84300	100750		88252	36376	Quantified	GO:0005524(MF:ATP binding);GO:0004674(MF:protein serine/threonine kinase activity)				PF00433(Protein kinase C terminal domain);PF00069(Protein kinase domain);PF00169(PH domain)
A0A3Q0JKN1	Ran GTPase-activating protein 1-like	LOC113473546		tr|A0A3Q0JKN1|A0A3Q0JKN1_DIACI;tr|A0A3Q0J7C6|A0A3Q0J7C6_DIACI;tr|A0A1S3DA71|A0A1S3DA71_DIACI;tr|A0A3Q0JPZ4|A0A3Q0JPZ4_DIACI	tr|A0A3Q0JKN1|A0A3Q0JKN1_DIACI Ran GTPase-activating protein 1-like OS=Diaphorina citri OX=121845 GN=LOC113473546 PE=4 SV=1;tr|A0A3Q0J7C6|A0A3Q0J7C6_DIACI Ran GTPase-activating protein 1 isoform X2 OS=Diaphorina citri OX=121845 GN=LOC103513674 PE=4 SV=1;tr	4	2	2	2	11.7	36.069	60116	71331	18798		40088	42622	Quantified					PF13516(Leucine Rich repeat)
A0A1S3DA74	Serine protease HTRA2, mitochondrial	LOC103513681		tr|A0A1S3DA74|A0A1S3DA74_DIACI	tr|A0A1S3DA74|A0A1S3DA74_DIACI Serine protease HTRA2, mitochondrial OS=Diaphorina citri OX=121845 GN=LOC103513681 PE=3 SV=1	1	2	2	2	7.4	41.998		21470		49509	44071	13514	Quantified	GO:0004252(MF:serine-type endopeptidase activity)	K04771(NA)	ko02020(Two-component system)	Mitochondrion intermembrane space;Single-pass membrane protein;Mitochondrion membrane	PF13365(Trypsin-like peptidase domain);PF13180(PDZ domain)
A0A1S3DA94	Histone H2A	LOC103514550		tr|A0A1S3DA94|A0A1S3DA94_DIACI;tr|A0A1S3DIS4|A0A1S3DIS4_DIACI;tr|A0A1S3DSL4|A0A1S3DSL4_DIACI	tr|A0A1S3DA94|A0A1S3DA94_DIACI Histone H2A OS=Diaphorina citri OX=121845 GN=LOC103514550 PE=3 SV=1;tr|A0A1S3DIS4|A0A1S3DIS4_DIACI Histone H2A OS=Diaphorina citri OX=121845 GN=LOC103519432 PE=3 SV=1;tr|A0A1S3DSL4|A0A1S3DSL4_DIACI Histone H2A OS=Diaphorina c	3	5	5	3	60.5	13.382	8872300	8567000	7988000	6946900	8911100	8859900	Quantified	GO:0000786(CC:nucleosome);GO:0005634(CC:nucleus);GO:0003677(MF:DNA binding);GO:0046982(MF:protein heterodimerization activity)			Chromosome;Nucleus	PF00125(Core histone H2A/H2B/H3/H4);PF16211(C-terminus of histone H2A)
A0A1S3DAC5	Uncharacterized protein LOC103513784	LOC103513784		tr|A0A1S3DAC5|A0A1S3DAC5_DIACI	tr|A0A1S3DAC5|A0A1S3DAC5_DIACI Uncharacterized protein LOC103513784 OS=Diaphorina citri OX=121845 GN=LOC103513784 PE=4 SV=1	1	2	1	1	18.4	22.994	38445	63858	19986		49616	51885	Quantified
A0A1S3DAG9	LYR motif-containing protein 4	LOC103514674		tr|A0A1S3DAG9|A0A1S3DAG9_DIACI	tr|A0A1S3DAG9|A0A1S3DAG9_DIACI LYR motif-containing protein 4 OS=Diaphorina citri OX=121845 GN=LOC103514674 PE=3 SV=1	1	2	2	2	30.1	11.096	3052.1	26001	58466	114990	121220	114600	Quantified					PF05347(Complex 1 protein (LYR family))
A0A1S3DAI2	Protein peanut-like	LOC103514753		tr|A0A1S3DAI2|A0A1S3DAI2_DIACI	tr|A0A1S3DAI2|A0A1S3DAI2_DIACI Protein peanut-like OS=Diaphorina citri OX=121845 GN=LOC103514753 PE=4 SV=1	1	1	1	1	17	11.29	120620	27745	93707				Quantified	GO:0005525(MF:GTP binding)				PF00735(Septin)
A0A1S3DAI5	Uncharacterized oxidoreductase C24B10.20-like	LOC103513870		tr|A0A1S3DAI5|A0A1S3DAI5_DIACI	tr|A0A1S3DAI5|A0A1S3DAI5_DIACI Uncharacterized oxidoreductase C24B10.20-like OS=Diaphorina citri OX=121845 GN=LOC103513870 PE=3 SV=1	1	5	1	1	67.2	21.546	138410	102970	101450		209410		Quantified					PF00106(short chain dehydrogenase)
A0A1S3DAJ3	Uncharacterized protein LOC103514595 isoform X1	LOC103514595		tr|A0A1S3DAJ3|A0A1S3DAJ3_DIACI	tr|A0A1S3DAJ3|A0A1S3DAJ3_DIACI Uncharacterized protein LOC103514595 isoform X1 OS=Diaphorina citri OX=121845 GN=LOC103514595 PE=4 SV=1	1	4	4	4	37.6	22.428	179090	154370	215900	134440	100220	105810	Quantified
A0A1S3DAN0	Large ribosomal subunit protein eL38	LOC103514770		tr|A0A1S3DAN0|A0A1S3DAN0_DIACI	tr|A0A1S3DAN0|A0A1S3DAN0_DIACI Large ribosomal subunit protein eL38 OS=Diaphorina citri OX=121845 GN=LOC103514770 PE=3 SV=1	1	2	2	2	28.2	9.1998	738430	774710	482280	55469	235680	619310	Quantified	GO:0006412(BP:translation);GO:0005840(CC:ribosome);GO:0003735(MF:structural constituent of ribosome)				PF01781(Ribosomal L38e protein family)
A0A1S3DAN5	Uncharacterized protein LOC103514777	LOC103514777		tr|A0A1S3DAN5|A0A1S3DAN5_DIACI	tr|A0A1S3DAN5|A0A1S3DAN5_DIACI Uncharacterized protein LOC103514777 OS=Diaphorina citri OX=121845 GN=LOC103514777 PE=4 SV=1	1	2	2	2	4.4	83.025	36083	29412	21281	36394	31062	33849	Quantified
A0A1S3DAP5	Uncharacterized protein LOC103514795	LOC103514795		tr|A0A1S3DAP5|A0A1S3DAP5_DIACI	tr|A0A1S3DAP5|A0A1S3DAP5_DIACI Uncharacterized protein LOC103514795 OS=Diaphorina citri OX=121845 GN=LOC103514795 PE=4 SV=1	1	1	1	1	14.4	15.729		12010	1503.9	20431	15634	16230	Quantified
A0A1S3DAQ1	Protein LSM14 homolog A	LOC103514700		tr|A0A1S3DAQ1|A0A1S3DAQ1_DIACI	tr|A0A1S3DAQ1|A0A1S3DAQ1_DIACI Protein LSM14 homolog A OS=Diaphorina citri OX=121845 GN=LOC103514700 PE=3 SV=1	1	8	8	8	34.8	43.009	902810	691520	302930	735910	686700	1003200	Quantified					PF12701(Scd6-like Sm domain);PF09532(FDF domain)
A0A1S3DAR2	Uncharacterized protein LOC103514828 isoform X3	LOC103514828		tr|A0A1S3DAR2|A0A1S3DAR2_DIACI	tr|A0A1S3DAR2|A0A1S3DAR2_DIACI Uncharacterized protein LOC103514828 isoform X3 OS=Diaphorina citri OX=121845 GN=LOC103514828 PE=3 SV=2	1	5	1	1	18.1	41.967	1030.2	850.09		400790	19476	257520	Quantified					PF01722(BolA-like protein)
A0A1S3DAS5	U6 snRNA-associated Sm-like protein LSm2	LOC103514923	FUNCTION: Binds specifically to the 3'-terminal U-tract of U6 snRNA. {ECO:0000256|PIRNR:PIRNR016394}.	tr|A0A1S3DAS5|A0A1S3DAS5_DIACI	tr|A0A1S3DAS5|A0A1S3DAS5_DIACI U6 snRNA-associated Sm-like protein LSm2 OS=Diaphorina citri OX=121845 GN=LOC103514923 PE=3 SV=1	1	1	1	1	17	12.789	161780	139830	95198	350730	136910	186950	Quantified	GO:0000398(BP:mRNA splicing, via spliceosome);GO:0016021(CC:integral component of membrane);GO:0005681(CC:spliceosomal complex);GO:0046540(CC:U4/U6 x U5 tri-snRNP complex);GO:0005688(CC:U6 snRNP);GO:0003723(MF:RNA binding)			Nucleus	PF01423(LSM domain)
A0A1S3DAT3	Protein NipSnap	LOC103514008		tr|A0A1S3DAT3|A0A1S3DAT3_DIACI	tr|A0A1S3DAT3|A0A1S3DAT3_DIACI Protein NipSnap OS=Diaphorina citri OX=121845 GN=LOC103514008 PE=3 SV=1	1	6	6	6	59.2	17.338	551040	598980	595010	912650	709600	700040	Quantified					PF07978(NIPSNAP)
A0A1S3DAU5	Glucose-6-phosphate isomerase	LOC103514039		tr|A0A1S3DAU5|A0A1S3DAU5_DIACI;CON__Q3ZBD7	tr|A0A1S3DAU5|A0A1S3DAU5_DIACI Glucose-6-phosphate isomerase OS=Diaphorina citri OX=121845 GN=LOC103514039 PE=3 SV=1	2	27	27	27	71.8	62.345	11754000	11530000	12834000	17381000	14111000	13500000	Quantified	GO:0006094(BP:gluconeogenesis);GO:0006096(BP:glycolytic process);GO:0004347(MF:glucose-6-phosphate isomerase activity)				PF00342(Phosphoglucose isomerase)
A0A1S3DAV5	Late endosomal/lysosomal adaptor and MAPK and MTOR activator 4	LOC103514986		tr|A0A1S3DAV5|A0A1S3DAV5_DIACI	tr|A0A1S3DAV5|A0A1S3DAV5_DIACI Late endosomal/lysosomal adaptor and MAPK and MTOR activator 4 OS=Diaphorina citri OX=121845 GN=LOC103514986 PE=3 SV=1	1	3	3	3	47.9	13.146	99881	89170	158570	91838	43945	9929.6	Quantified	GO:0071230(BP:cellular response to amino acid stimulus);GO:0032008(BP:positive regulation of TOR signaling);GO:0071986(CC:Ragulator complex)
A0A1S3DAY5	26S proteasome regulatory subunit 4-like	LOC103514125		tr|A0A1S3DAY5|A0A1S3DAY5_DIACI	tr|A0A1S3DAY5|A0A1S3DAY5_DIACI 26S proteasome regulatory subunit 4-like OS=Diaphorina citri OX=121845 GN=LOC103514125 PE=3 SV=1	1	8	8	6	24.4	49.057	826820	672550	568410	1200000	691250	777910	Quantified	GO:0000502(CC:proteasome complex);GO:0005524(MF:ATP binding);GO:0036402(MF:proteasome-activating ATPase activity)				PF00004(ATPase family associated with various cellular activities (AAA))
A0A1S3DB12	Deleted in autism protein 1	LOC103515042		tr|A0A1S3DB12|A0A1S3DB12_DIACI	tr|A0A1S3DB12|A0A1S3DB12_DIACI Deleted in autism protein 1 OS=Diaphorina citri OX=121845 GN=LOC103515042 PE=3 SV=1	1	1	1	1	4.3	44.755	22985	15661	28592	45160	33809	27307	Quantified				Secreted	PF12260(Protein-kinase domain of FAM69)
A0A1S3DB14	Adenylate kinase-like	LOC103514940		tr|A0A1S3DB14|A0A1S3DB14_DIACI	tr|A0A1S3DB14|A0A1S3DB14_DIACI Adenylate kinase-like OS=Diaphorina citri OX=121845 GN=LOC103514940 PE=3 SV=1	1	5	5	5	52.9	16.282	502040	386480	631820	578870	534000	551440	Quantified	GO:0006139(BP:nucleobase-containing compound metabolic process);GO:0005524(MF:ATP binding);GO:0019205(MF:nucleobase-containing compound kinase activity)				PF00406(Adenylate kinase)
A0A1S3DB18	GrpE protein homolog	LOC103514947	FUNCTION: Essential component of the PAM complex, a complex required for the translocation of transit peptide-containing proteins from the inner membrane into the mitochondrial matrix in an ATP-dependent manner. {ECO:0000256|RuleBase:RU000640}.	tr|A0A1S3DB18|A0A1S3DB18_DIACI	tr|A0A1S3DB18|A0A1S3DB18_DIACI GrpE protein homolog OS=Diaphorina citri OX=121845 GN=LOC103514947 PE=3 SV=1	1	3	3	2	42.2	11.337	339290	303100	153900	564800	335950	507290	Quantified	GO:0006457(BP:protein folding);GO:0005759(CC:mitochondrial matrix);GO:0000774(MF:adenyl-nucleotide exchange factor activity);GO:0051087(MF:chaperone binding);GO:0042803(MF:protein homodimerization activity)			Mitochondrion matrix	PF01025(GrpE)
A0A1S3DB21	Thioredoxin domain-containing protein 5 homolog	LOC103515126		tr|A0A1S3DB21|A0A1S3DB21_DIACI	tr|A0A1S3DB21|A0A1S3DB21_DIACI Thioredoxin domain-containing protein 5 homolog OS=Diaphorina citri OX=121845 GN=LOC103515126 PE=3 SV=1	1	13	13	13	50.6	45.213	1410500	1163700	1163000	1027800	1195600	1333200	Quantified	GO:0045454(BP:cell redox homeostasis);GO:0005623(CC:cell);GO:0003756(MF:protein disulfide isomerase activity)				PF00085(Thioredoxin)
A0A1S3DB26	Uncharacterized protein LOC103515065 isoform X2	LOC103515065		tr|A0A1S3DB26|A0A1S3DB26_DIACI;tr|A0A1S3DBE4|A0A1S3DBE4_DIACI	tr|A0A1S3DB26|A0A1S3DB26_DIACI Uncharacterized protein LOC103515065 isoform X2 OS=Diaphorina citri OX=121845 GN=LOC103515065 PE=4 SV=1;tr|A0A1S3DBE4|A0A1S3DBE4_DIACI Uncharacterized protein LOC103515065 isoform X1 OS=Diaphorina citri OX=121845 GN=LOC103515	2	1	1	1	3.8	47.497	77291	71405	22373	68987	55602	48964	Quantified
A0A1S3DB28	Uncharacterized protein LOC103514881	LOC103514881		tr|A0A1S3DB28|A0A1S3DB28_DIACI	tr|A0A1S3DB28|A0A1S3DB28_DIACI Uncharacterized protein LOC103514881 OS=Diaphorina citri OX=121845 GN=LOC103514881 PE=4 SV=1	1	2	2	2	15.5	22.097	80061	91876	55578	59158	64976	106660	Quantified
A0A1S3DB40	Large ribosomal subunit protein uL2	LOC103514987		tr|A0A1S3DB40|A0A1S3DB40_DIACI	tr|A0A1S3DB40|A0A1S3DB40_DIACI Large ribosomal subunit protein uL2 OS=Diaphorina citri OX=121845 GN=LOC103514987 PE=3 SV=1	1	8	8	8	35.8	27.976	1623500	2384400	1311000	2071100	2154000	2800800	Quantified	GO:0006412(BP:translation);GO:0005840(CC:ribosome);GO:0003735(MF:structural constituent of ribosome)	K02886(NA)	ko03010(Ribosome)		PF03947(Ribosomal Proteins L2, C-terminal domain);PF00181(Ribosomal Proteins L2, RNA binding domain)
A0A1S3DB56	Adenylate kinase-like	LOC103514941		tr|A0A1S3DB56|A0A1S3DB56_DIACI	tr|A0A1S3DB56|A0A1S3DB56_DIACI Adenylate kinase-like OS=Diaphorina citri OX=121845 GN=LOC103514941 PE=3 SV=1	1	2	2	2	23.5	9.5759	174800	386660	196250	17889	413570	187440	Quantified	GO:0006139(BP:nucleobase-containing compound metabolic process);GO:0005524(MF:ATP binding);GO:0019205(MF:nucleobase-containing compound kinase activity)				PF00406(Adenylate kinase)
A0A1S3DB58	Eukaryotic translation initiation factor 5B-like	LOC103514258		tr|A0A1S3DB58|A0A1S3DB58_DIACI	tr|A0A1S3DB58|A0A1S3DB58_DIACI Eukaryotic translation initiation factor 5B-like OS=Diaphorina citri OX=121845 GN=LOC103514258 PE=4 SV=1	1	4	4	4	17.8	41.404	1504600	1240500	1007000	1800100	1060900	1058100	Quantified	GO:0003743(MF:translation initiation factor activity)
A0A1S3DB61	Endonuclease	LOC103515098		tr|A0A1S3DB61|A0A1S3DB61_DIACI	tr|A0A1S3DB61|A0A1S3DB61_DIACI Endonuclease OS=Diaphorina citri OX=121845 GN=LOC103515098 PE=3 SV=1	1	5	5	5	27	34.064	181830	192280	142630	270450	132180	123790	Quantified	GO:0004519(MF:endonuclease activity);GO:0046872(MF:metal ion binding);GO:0003676(MF:nucleic acid binding)				PF01223(DNA/RNA non-specific endonuclease)
A0A1S3DB76	Syntaxin-12-like	LOC103515048		tr|A0A1S3DB76|A0A1S3DB76_DIACI	tr|A0A1S3DB76|A0A1S3DB76_DIACI Syntaxin-12-like OS=Diaphorina citri OX=121845 GN=LOC103515048 PE=3 SV=1	1	3	3	3	16.7	32.344	90562	52824	96948	70554	54044	62372	Quantified	GO:0006886(BP:intracellular protein transport);GO:0016192(BP:vesicle-mediated transport);GO:0016021(CC:integral component of membrane);GO:0005484(MF:SNAP receptor activity)			Membrane;Single-pass type IV membrane protein	PF05739(SNARE domain);PF14523(Syntaxin-like protein)
A0A1S3DB94	Chemosensory protein 2	LOC103514997		tr|A0A1S3DB94|A0A1S3DB94_DIACI;tr|A0A1S3DAW3|A0A1S3DAW3_DIACI;tr|A0A2Z2GXF8|A0A2Z2GXF8_DIACI	tr|A0A1S3DB94|A0A1S3DB94_DIACI Chemosensory protein 2 OS=Diaphorina citri OX=121845 GN=LOC103514997 PE=2 SV=1;tr|A0A1S3DAW3|A0A1S3DAW3_DIACI Ejaculatory bulb-specific protein 3-like OS=Diaphorina citri OX=121845 GN=LOC103515000 PE=4 SV=1;tr|A0A2Z2GXF8|A0A2	3	3	3	3	28.9	14.838	224200	262740	45360		145390	206990	Quantified					PF03392(Insect pheromone-binding family, A10/OS-D)
A0A1S3DMJ2	Cathepsin K-like	LOC103521260		tr|A0A1S3DMJ2|A0A1S3DMJ2_DIACI;tr|A0A1S3DB95|A0A1S3DB95_DIACI	tr|A0A1S3DMJ2|A0A1S3DMJ2_DIACI Cathepsin K-like OS=Diaphorina citri OX=121845 GN=LOC103521260 PE=3 SV=1;tr|A0A1S3DB95|A0A1S3DB95_DIACI Cathepsin L1-like OS=Diaphorina citri OX=121845 GN=LOC103515186 PE=3 SV=1	2	10	10	1	56.6	25.358	26864000	26661000	11955000	25217000	26568000	46106000	Quantified	GO:0008234(MF:cysteine-type peptidase activity)				PF00112(Papain family cysteine protease)
A0A1S3DBA0	Formin-binding protein 1-like isoform X3	LOC103515191		tr|A0A1S3DBA0|A0A1S3DBA0_DIACI;tr|A0A1S3DBI6|A0A1S3DBI6_DIACI;tr|A0A1S3DBH7|A0A1S3DBH7_DIACI	tr|A0A1S3DBA0|A0A1S3DBA0_DIACI Formin-binding protein 1-like isoform X3 OS=Diaphorina citri OX=121845 GN=LOC103515191 PE=4 SV=1;tr|A0A1S3DBI6|A0A1S3DBI6_DIACI Formin-binding protein 1-like isoform X1 OS=Diaphorina citri OX=121845 GN=LOC103515191 PE=4 SV=1;	3	2	2	2	4.9	69.31	44903	50431	65082	164040	3313.1	41586	Quantified					PF00611(Fes/CIP4, and EFC/F-BAR homology domain);PF00018(SH3 domain)
A0A1S3DBA4	UBX domain-containing protein 1-B-like	LOC103515207		tr|A0A1S3DBA4|A0A1S3DBA4_DIACI;tr|A0A1S4ECK4|A0A1S4ECK4_DIACI;tr|A0A1S4ECY7|A0A1S4ECY7_DIACI	tr|A0A1S3DBA4|A0A1S3DBA4_DIACI UBX domain-containing protein 1-B-like OS=Diaphorina citri OX=121845 GN=LOC103515207 PE=4 SV=1;tr|A0A1S4ECK4|A0A1S4ECK4_DIACI UBX domain-containing protein 1-B-like OS=Diaphorina citri OX=121845 GN=LOC103510149 PE=4 SV=2;tr|A	3	4	4	4	22.9	36.51	412870	274680	307350	302960	318900	275630	Quantified	GO:0003676(MF:nucleic acid binding)			Cytoplasm	PF00627(UBA/TS-N domain);PF00789(UBX domain)
A0A1S3DBC4	Uncharacterized protein LOC103515118 isoform X1	LOC103515118		tr|A0A1S3DBC4|A0A1S3DBC4_DIACI;tr|A0A3Q0JAH8|A0A3Q0JAH8_DIACI	tr|A0A1S3DBC4|A0A1S3DBC4_DIACI Uncharacterized protein LOC103515118 isoform X1 OS=Diaphorina citri OX=121845 GN=LOC103515118 PE=4 SV=1;tr|A0A3Q0JAH8|A0A3Q0JAH8_DIACI Uncharacterized protein LOC103515118 isoform X2 OS=Diaphorina citri OX=121845 GN=LOC103515	2	3	3	3	8	95.51		44382	70759	65294	69796	41305	Quantified					PF00041(Fibronectin type III domain)
A0A1S3DBC7	AP complex subunit sigma	LOC103515127		tr|A0A1S3DBC7|A0A1S3DBC7_DIACI	tr|A0A1S3DBC7|A0A1S3DBC7_DIACI AP complex subunit sigma OS=Diaphorina citri OX=121845 GN=LOC103515127 PE=3 SV=1	1	1	1	1	12.1	18.459	45841	39182	40286	67888	45445	56983	Quantified	GO:0006886(BP:intracellular protein transport);GO:0016192(BP:vesicle-mediated transport);GO:0030117(CC:membrane coat)			Golgi apparatus;Membrane;clathrin-coated pit	PF01217(Clathrin adaptor complex small chain)
A0A1S3DBE6	Transmembrane protein 50A-like	LOC103515350		tr|A0A1S3DBE6|A0A1S3DBE6_DIACI	tr|A0A1S3DBE6|A0A1S3DBE6_DIACI Transmembrane protein 50A-like OS=Diaphorina citri OX=121845 GN=LOC103515350 PE=3 SV=1	1	1	1	1	9.4	17.634		41742	64574	12137	40024	40952	Quantified	GO:0016021(CC:integral component of membrane)			Membrane;Multi-pass membrane protein	PF05255(Uncharacterised protein family (UPF0220))
A0A1S3DBF4	3-ketoacyl-CoA thiolase, mitochondrial isoform X1	LOC103514425		tr|A0A1S3DBF4|A0A1S3DBF4_DIACI	tr|A0A1S3DBF4|A0A1S3DBF4_DIACI 3-ketoacyl-CoA thiolase, mitochondrial isoform X1 OS=Diaphorina citri OX=121845 GN=LOC103514425 PE=3 SV=1	1	17	17	2	71.4	41.623	6646600	6582900	6443000	6570400	9523200	7281600	Quantified	GO:0016747(MF:transferase activity, transferring acyl groups other than amino-acyl groups)				PF02803(Thiolase, C-terminal domain);PF00108(Thiolase, N-terminal domain)
A0A1S3DBF6	Magnesium-dependent phosphatase 1-like	LOC103515168		tr|A0A1S3DBF6|A0A1S3DBF6_DIACI	tr|A0A1S3DBF6|A0A1S3DBF6_DIACI Magnesium-dependent phosphatase 1-like OS=Diaphorina citri OX=121845 GN=LOC103515168 PE=4 SV=1	1	3	3	3	41.5	16.242	145210	178060	165700	237340	187960	270350	Quantified	GO:0016791(MF:phosphatase activity)				PF12689(Acid Phosphatase)
A0A1S3DBF9	Sodium/potassium-transporting ATPase subunit beta-2-like isoform X2	LOC103514430		tr|A0A1S3DBF9|A0A1S3DBF9_DIACI;tr|A0A3Q0J8C5|A0A3Q0J8C5_DIACI;tr|A0A1S4EHU8|A0A1S4EHU8_DIACI	tr|A0A1S3DBF9|A0A1S3DBF9_DIACI Sodium/potassium-transporting ATPase subunit beta-2-like isoform X2 OS=Diaphorina citri OX=121845 GN=LOC103514430 PE=3 SV=1;tr|A0A3Q0J8C5|A0A3Q0J8C5_DIACI Sodium/potassium-transporting ATPase subunit beta-2-like isoform X4 OS	3	9	9	9	41.9	37.908	234690	415830	559780	299560	946530	1090400	Quantified	GO:0006813(BP:potassium ion transport);GO:0006814(BP:sodium ion transport);GO:0005890(CC:sodium:potassium-exchanging ATPase complex)			Cell membrane;Single-pass type II membrane protein	PF00287(Sodium / potassium ATPase beta chain)
A0A1S3DBH5	Cytochrome c oxidase assembly protein COX20, mitochondrial	LOC103514452		tr|A0A1S3DBH5|A0A1S3DBH5_DIACI;tr|A0A1S3DTB7|A0A1S3DTB7_DIACI	tr|A0A1S3DBH5|A0A1S3DBH5_DIACI Cytochrome c oxidase assembly protein COX20, mitochondrial OS=Diaphorina citri OX=121845 GN=LOC103514452 PE=3 SV=1;tr|A0A1S3DTB7|A0A1S3DTB7_DIACI Cytochrome c oxidase assembly protein COX20, mitochondrial OS=Diaphorina citri	2	2	2	2	22.6	13.084		36893	46485	207770	147800	134980	Quantified	GO:0033617(BP:mitochondrial respiratory chain complex IV assembly);GO:0016021(CC:integral component of membrane);GO:0005743(CC:mitochondrial inner membrane)				PF12597(Protein of unknown function (DUF3767))
A0A1S3DBH8	Ervatamin-C-like	LOC103515421		tr|A0A1S3DBH8|A0A1S3DBH8_DIACI	tr|A0A1S3DBH8|A0A1S3DBH8_DIACI Ervatamin-C-like OS=Diaphorina citri OX=121845 GN=LOC103515421 PE=3 SV=1	1	8	8	5	38.9	36.924	2493400	1921800	2388600	2085300	2572600	2421300	Quantified	GO:0008234(MF:cysteine-type peptidase activity)				PF08246(Cathepsin propeptide inhibitor domain (I29));PF00112(Papain family cysteine protease)
A0A1S3DBK9	26S proteasome complex subunit SEM1	LOC103515170		tr|A0A1S3DBK9|A0A1S3DBK9_DIACI	tr|A0A1S3DBK9|A0A1S3DBK9_DIACI 26S proteasome complex subunit SEM1 OS=Diaphorina citri OX=121845 GN=LOC103515170 PE=3 SV=1	1	2	2	2	63.1	9.9564	28801	87705	35341	46379	63165	66890	Quantified	GO:0006406(BP:mRNA export from nucleus);GO:0043248(BP:proteasome assembly);GO:0008541(CC:proteasome regulatory particle, lid subcomplex)			Nucleus	PF05160(DSS1/SEM1 family)
A0A1S3DBM9	glucose-6-phosphate 1-epimerase	LOC103515205		tr|A0A1S3DBM9|A0A1S3DBM9_DIACI	tr|A0A1S3DBM9|A0A1S3DBM9_DIACI glucose-6-phosphate 1-epimerase OS=Diaphorina citri OX=121845 GN=LOC103515205 PE=3 SV=1	1	1	1	1	8.7	30.139	12964	21130	23937	32406	32562	38626	Quantified	GO:0005975(BP:carbohydrate metabolic process);GO:0030246(MF:carbohydrate binding);GO:0047938(MF:glucose-6-phosphate 1-epimerase activity)				PF01263(Aldose 1-epimerase)
A0A1S3DBN5	Uncharacterized protein LOC103515454	LOC103515454		tr|A0A1S3DBN5|A0A1S3DBN5_DIACI	tr|A0A1S3DBN5|A0A1S3DBN5_DIACI Uncharacterized protein LOC103515454 OS=Diaphorina citri OX=121845 GN=LOC103515454 PE=3 SV=1	1	1	1	1	5.1	41.493	13556	70400	54846		58832		Quantified	GO:0006457(BP:protein folding);GO:0009408(BP:response to heat);GO:0005524(MF:ATP binding);GO:0031072(MF:heat shock protein binding);GO:0046872(MF:metal ion binding);GO:0051082(MF:unfolded protein binding)				PF00226(DnaJ domain);PF00684(DnaJ central domain);PF01556(DnaJ C terminal domain)
A0A1S3DBQ2	BTB/POZ domain-containing protein KCTD12	LOC103515332		tr|A0A1S3DBQ2|A0A1S3DBQ2_DIACI	tr|A0A1S3DBQ2|A0A1S3DBQ2_DIACI BTB/POZ domain-containing protein KCTD12 OS=Diaphorina citri OX=121845 GN=LOC103515332 PE=4 SV=1	1	5	5	5	21	27.066	140530	201920	205260	352550	265560	241290	Quantified	GO:0051260(BP:protein homooligomerization)				PF02214(BTB/POZ domain)
A0A1S3DBQ5	Uncharacterized protein YMR317W-like	LOC103515490		tr|A0A1S3DBQ5|A0A1S3DBQ5_DIACI	tr|A0A1S3DBQ5|A0A1S3DBQ5_DIACI Uncharacterized protein YMR317W-like OS=Diaphorina citri OX=121845 GN=LOC103515490 PE=4 SV=1	1	2	2	2	5.1	34.392	741290	280150	265360	1509200	653290	1060800	Quantified
A0A1S3DBS1	Uncharacterized protein LOC103515362	LOC103515362		tr|A0A1S3DBS1|A0A1S3DBS1_DIACI	tr|A0A1S3DBS1|A0A1S3DBS1_DIACI Uncharacterized protein LOC103515362 OS=Diaphorina citri OX=121845 GN=LOC103515362 PE=4 SV=1	1	5	5	5	23.1	58.698	1312800	849700	794550	3834.1	6697.7	2312.3	Quantified	GO:0006904(BP:vesicle docking involved in exocytosis);GO:0000145(CC:exocyst);GO:0042302(MF:structural constituent of cuticle)				PF00379(Insect cuticle protein);PF04091(Exocyst complex subunit Sec15-like)
A0A1S3DBT7	Leptin receptor overlapping transcript-like 1	LOC103515308		tr|A0A1S3DBT7|A0A1S3DBT7_DIACI	tr|A0A1S3DBT7|A0A1S3DBT7_DIACI Leptin receptor overlapping transcript-like 1 OS=Diaphorina citri OX=121845 GN=LOC103515308 PE=3 SV=1	1	1	1	1	11	13.252	63003		23325	46953	17558	48177	Quantified	GO:0016021(CC:integral component of membrane)			Membrane;Multi-pass membrane protein	PF04133(Vacuolar protein sorting 55)
A0A1S3DBU1	Golgi phosphoprotein 3 homolog sauron	LOC103515313		tr|A0A1S3DBU1|A0A1S3DBU1_DIACI	tr|A0A1S3DBU1|A0A1S3DBU1_DIACI Golgi phosphoprotein 3 homolog sauron OS=Diaphorina citri OX=121845 GN=LOC103515313 PE=3 SV=1	1	1	1	1	7.4	26.353	18197	19550		2744.6	2286.1	1555.5	Quantified	GO:0070273(MF:phosphatidylinositol-4-phosphate binding)			Membrane;Peripheral membrane protein;Cytoplasmic side	PF05719(Golgi phosphoprotein 3 (GPP34))
A0A1S3DBU9	Beta-centractin	LOC103515319		tr|A0A1S3DBU9|A0A1S3DBU9_DIACI	tr|A0A1S3DBU9|A0A1S3DBU9_DIACI Beta-centractin OS=Diaphorina citri OX=121845 GN=LOC103515319 PE=3 SV=1	1	8	8	8	41.5	42.555	600410	535220	667290	1015800	635140	597920	Quantified					PF00022(Actin)
A0A3Q0JC67	Zinc transporter 1-like	LOC103516296		tr|A0A3Q0JC67|A0A3Q0JC67_DIACI;tr|A0A1S3DBV3|A0A1S3DBV3_DIACI	tr|A0A3Q0JC67|A0A3Q0JC67_DIACI Zinc transporter 1-like OS=Diaphorina citri OX=121845 GN=LOC103516296 PE=4 SV=1;tr|A0A1S3DBV3|A0A1S3DBV3_DIACI Zinc transporter 1-like OS=Diaphorina citri OX=121845 GN=LOC103515641 PE=3 SV=1	2	2	2	2	25.9	16.917	5238.4	43821	57247	32681	45750	45734	Quantified
A0A1S3DBV4	Uncharacterized protein LOC103515448	LOC103515448		tr|A0A1S3DBV4|A0A1S3DBV4_DIACI;tr|A0A1S3DIG5|A0A1S3DIG5_DIACI	tr|A0A1S3DBV4|A0A1S3DBV4_DIACI Uncharacterized protein LOC103515448 OS=Diaphorina citri OX=121845 GN=LOC103515448 PE=4 SV=1	2	14	14	14	64.3	26.073	6220800	4221600	2441600	7967400	3465300	6754900	Quantified
A0A1S3DBV5	Density-regulated protein	LOC103515568		tr|A0A1S3DBV5|A0A1S3DBV5_DIACI	tr|A0A1S3DBV5|A0A1S3DBV5_DIACI Density-regulated protein OS=Diaphorina citri OX=121845 GN=LOC103515568 PE=3 SV=1	1	2	2	2	18	20.506	69919	11771	7622.6	53518	58912	57560	Quantified	GO:0003743(MF:translation initiation factor activity)				PF01253(Translation initiation factor SUI1)
A0A1S3DBW7	LOW QUALITY PROTEIN: cuticle protein-like	LOC103515659		tr|A0A1S3DBW7|A0A1S3DBW7_DIACI	tr|A0A1S3DBW7|A0A1S3DBW7_DIACI LOW QUALITY PROTEIN: cuticle protein-like OS=Diaphorina citri OX=121845 GN=LOC103515659 PE=4 SV=2	1	4	4	4	48.7	41.106	227570	161290	212620	76285	84184	73027	Quantified	GO:0042302(MF:structural constituent of cuticle)				PF00379(Insect cuticle protein)
A0A1S3DR97	Ubiquitin	LOC103522510		tr|A0A1S3DR97|A0A1S3DR97_DIACI;tr|Q0PXX3|Q0PXX3_DIACI;tr|A0A3Q0J167|A0A3Q0J167_DIACI;tr|Q0PXU7|Q0PXU7_DIACI;tr|A0A3Q0J4G8|A0A3Q0J4G8_DIACI;tr|A0A1S3DBX7|A0A1S3DBX7_DIACI;tr|A0A1S4EHZ1|A0A1S4EHZ1_DIACI;tr|A0A3Q0ITB3|A0A3Q0ITB3_DIACI;tr|A0A3Q0JF84|A0A3Q0JF84_DIACI;tr|A0A3Q0J121|A0A3Q0J121_DIACI	tr|A0A1S3DR97|A0A1S3DR97_DIACI Ubiquitin OS=Diaphorina citri OX=121845 GN=LOC103522510 PE=4 SV=1;tr|Q0PXX3|Q0PXX3_DIACI Ubiquitin-ribosomal protein eL40 fusion protein OS=Diaphorina citri OX=121845 PE=2 SV=1;tr|A0A3Q0J167|A0A3Q0J167_DIACI Polyubiquitin-lik	10	4	1	1	48.9	9.9134	8957300	5590700	6909500	15056000	7123100	7385000	Quantified					PF00240(Ubiquitin family)
A0A1S3DBZ8	Uncharacterized protein LOC103515706	LOC103515706		tr|A0A1S3DBZ8|A0A1S3DBZ8_DIACI	tr|A0A1S3DBZ8|A0A1S3DBZ8_DIACI Uncharacterized protein LOC103515706 OS=Diaphorina citri OX=121845 GN=LOC103515706 PE=4 SV=1	1	1	1	1	6.9	28.276	27345	16608	4348.7	31753	14630	22001	Quantified				Cytoplasm	PF10477(Nucleocytoplasmic shuttling protein for mRNA cap-binding EIF4E)
A0A1S3DC06	Tyrosine--tRNA ligase, mitochondrial-like	LOC103514741		tr|A0A1S3DC06|A0A1S3DC06_DIACI	tr|A0A1S3DC06|A0A1S3DC06_DIACI Tyrosine--tRNA ligase, mitochondrial-like OS=Diaphorina citri OX=121845 GN=LOC103514741 PE=3 SV=1	1	3	3	3	17.9	32.664	26834	34341	64008	38537	35756	49399	Quantified	GO:0006418(BP:tRNA aminoacylation for protein translation);GO:0005524(MF:ATP binding);GO:0003723(MF:RNA binding);GO:0004831(MF:tyrosine-tRNA ligase activity)				PF00579(tRNA synthetases class I (W and Y))
A0A1S3DC09	Elongation factor G, mitochondrial	LOC103515726	FUNCTION: Mitochondrial GTPase that catalyzes the GTP-dependent ribosomal translocation step during translation elongation. During this step, the ribosome changes from the pre-translocational (PRE) to the post-translocational (POST) state as the newly formed A-site-bound peptidyl-tRNA and P-site-bound deacylated tRNA move to the P and E sites, respectively. Catalyzes the coordinated movement of t…	tr|A0A1S3DC09|A0A1S3DC09_DIACI;tr|A0A1S3DQS4|A0A1S3DQS4_DIACI	tr|A0A1S3DC09|A0A1S3DC09_DIACI Elongation factor G, mitochondrial OS=Diaphorina citri OX=121845 GN=LOC103515726 PE=3 SV=1;tr|A0A1S3DQS4|A0A1S3DQS4_DIACI Elongation factor G, mitochondrial-like OS=Diaphorina citri OX=121845 GN=LOC103523047 PE=4 SV=2	2	9	9	9	19.5	83.544	361190	341700	343270	544250	395600	447150	Quantified	GO:0070125(BP:mitochondrial translational elongation);GO:0005739(CC:mitochondrion);GO:0005525(MF:GTP binding);GO:0003924(MF:GTPase activity);GO:0003746(MF:translation elongation factor activity)			Mitochondrion	PF00009(Elongation factor Tu GTP binding domain);PF00679(Elongation factor G C-terminus);PF03144(Elongation factor Tu domain 2);PF14492(Elongation Factor G, domain II);PF03764(Elongation factor G, domain IV)
A0A1S3DDP3	Uncharacterized protein LOC103515738 isoform X2	LOC103515738		tr|A0A1S3DDP3|A0A1S3DDP3_DIACI;tr|A0A1S3DC18|A0A1S3DC18_DIACI	tr|A0A1S3DDP3|A0A1S3DDP3_DIACI Uncharacterized protein LOC103515738 isoform X2 OS=Diaphorina citri OX=121845 GN=LOC103515738 PE=4 SV=1;tr|A0A1S3DC18|A0A1S3DC18_DIACI Uncharacterized protein LOC103515738 isoform X1 OS=Diaphorina citri OX=121845 GN=LOC103515	2	7	7	7	57.3	11.18	6483700	4291600	3817400	4379800	3323400	2677800	Quantified
A0A1S3DC23	Carboxypeptidase	LOC103515678		tr|A0A1S3DC23|A0A1S3DC23_DIACI	tr|A0A1S3DC23|A0A1S3DC23_DIACI Carboxypeptidase OS=Diaphorina citri OX=121845 GN=LOC103515678 PE=3 SV=1	1	8	8	8	26.5	55.107	2323200	2444300	2413800	4485100	2862500	3104400	Quantified	GO:0004185(MF:serine-type carboxypeptidase activity)				PF00450(Serine carboxypeptidase)
A0A1S3DC28	LOW QUALITY PROTEIN: cytochrome P450 4g15-like	LOC103515687		tr|A0A1S3DC28|A0A1S3DC28_DIACI	tr|A0A1S3DC28|A0A1S3DC28_DIACI LOW QUALITY PROTEIN: cytochrome P450 4g15-like OS=Diaphorina citri OX=121845 GN=LOC103515687 PE=3 SV=1	1	4	2	2	6.4	66.237	137540	32647	223150	1356200	319980	140180	Quantified	GO:0016021(CC:integral component of membrane);GO:0020037(MF:heme binding);GO:0005506(MF:iron ion binding);GO:0004497(MF:monooxygenase activity);GO:0016705(MF:oxidoreductase activity, acting on paired donors, with incorporation or reduction of molecular oxygen)			Endoplasmic reticulum membrane;Peripheral membrane protein;Membrane;Microsome membrane	PF00067(Cytochrome P450)
A0A1S3DC36	Uncharacterized protein LOC103515486	LOC103515486		tr|A0A1S3DC36|A0A1S3DC36_DIACI	tr|A0A1S3DC36|A0A1S3DC36_DIACI Uncharacterized protein LOC103515486 OS=Diaphorina citri OX=121845 GN=LOC103515486 PE=4 SV=1	1	4	4	4	32	19.917	2570200	2241500	4330000	2367900	3402900	5596500	Quantified
A0A1S3DC37	Epidermal growth factor receptor substrate 15-like 1	LOC103514798		tr|A0A1S3DC37|A0A1S3DC37_DIACI	tr|A0A1S3DC37|A0A1S3DC37_DIACI Epidermal growth factor receptor substrate 15-like 1 OS=Diaphorina citri OX=121845 GN=LOC103514798 PE=4 SV=1	1	7	7	7	17.5	60.751	149840	73734	162280	26210	161420	88757	Quantified	GO:0005509(MF:calcium ion binding)				PF12763(Cytoskeletal-regulatory complex EF hand)
A0A1S3DC53	Uncharacterized protein LOC103514813	LOC103514813		tr|A0A1S3DC53|A0A1S3DC53_DIACI	tr|A0A1S3DC53|A0A1S3DC53_DIACI Uncharacterized protein LOC103514813 OS=Diaphorina citri OX=121845 GN=LOC103514813 PE=4 SV=1	1	1	1	1	4.8	40.057	33740	45988	17048		19322	30233	Quantified
A0A1S3DC59	Programmed cell death 6-interacting protein	LOC103515635		tr|A0A1S3DC59|A0A1S3DC59_DIACI;tr|A0A3Q0JAT4|A0A3Q0JAT4_DIACI;tr|A0A1S3DS56|A0A1S3DS56_DIACI	tr|A0A1S3DC59|A0A1S3DC59_DIACI Programmed cell death 6-interacting protein OS=Diaphorina citri OX=121845 GN=LOC103515635 PE=4 SV=1	3	14	2	2	29.5	76.269	40209	81009	81434		54217	59366	Quantified					PF13949(ALIX V-shaped domain binding to HIV);PF03097(BRO1-like domain)
A0A1S3DC67	Succinate--CoA ligase [GDP-forming] subunit beta, mitochondrial	LOC103514852		tr|A0A1S3DC67|A0A1S3DC67_DIACI	tr|A0A1S3DC67|A0A1S3DC67_DIACI Succinate--CoA ligase [GDP-forming] subunit beta, mitochondrial OS=Diaphorina citri OX=121845 GN=LOC103514852 PE=4 SV=1	1	10	10	10	48.1	34.639	1542500	1792700	1765100	2759100	2263000	1959100	Quantified	GO:0006099(BP:tricarboxylic acid cycle);GO:0016874(MF:ligase activity)	K01903(NA)	ko00020(Citrate cycle (TCA cycle));ko00640(Propanoate metabolism);ko00660(C5-Branched dibasic acid metabolism);ko00720(Carbon fixation pathways in prokaryotes)		PF00549(CoA-ligase);PF08442(ATP-grasp domain)
A0A1S3DTA9	Mitotic checkpoint protein BUB3-like	LOC103523470		tr|A0A1S3DTA9|A0A1S3DTA9_DIACI;tr|A0A1S3DC81|A0A1S3DC81_DIACI;tr|A0A3Q0J6B9|A0A3Q0J6B9_DIACI	tr|A0A1S3DTA9|A0A1S3DTA9_DIACI Mitotic checkpoint protein BUB3-like OS=Diaphorina citri OX=121845 GN=LOC103523470 PE=4 SV=1;tr|A0A1S3DC81|A0A1S3DC81_DIACI Mitotic checkpoint protein BUB3 isoform X3 OS=Diaphorina citri OX=121845 GN=LOC103515562 PE=4 SV=1;tr	3	1	1	1	18.1	10.431	77738	30622	25867	80780	46261	35421	Quantified					PF00400(WD domain, G-beta repeat)
A0A1S3DC91	SUMO-activating enzyme subunit 1-like	LOC103515578		tr|A0A1S3DC91|A0A1S3DC91_DIACI	tr|A0A1S3DC91|A0A1S3DC91_DIACI SUMO-activating enzyme subunit 1-like OS=Diaphorina citri OX=121845 GN=LOC103515578 PE=4 SV=1	1	3	2	2	28.5	21.867	65772	190510	198270	162870	264320	286330	Quantified	GO:0008641(MF:ubiquitin-like modifier activating enzyme activity)
A0A1S3DCA9	Protein-serine/threonine kinase	LOC103515710		tr|A0A1S3DCA9|A0A1S3DCA9_DIACI	tr|A0A1S3DCA9|A0A1S3DCA9_DIACI Protein-serine/threonine kinase OS=Diaphorina citri OX=121845 GN=LOC103515710 PE=3 SV=1	1	4	4	4	16.9	47.845	45888	143080	111140	94496	123530	163340	Quantified	GO:0005759(CC:mitochondrial matrix);GO:0005524(MF:ATP binding);GO:0004672(MF:protein kinase activity)			Mitochondrion matrix	PF02518(Histidine kinase-, DNA gyrase B-, and HSP90-like ATPase);PF10436(Mitochondrial branched-chain alpha-ketoacid dehydrogenase kinase)
A0A1S3DCB6	U1 small nuclear ribonucleoprotein 70 kDa	LOC103515828		tr|A0A1S3DCB6|A0A1S3DCB6_DIACI;tr|A0A3Q0J280|A0A3Q0J280_DIACI	tr|A0A1S3DCB6|A0A1S3DCB6_DIACI U1 small nuclear ribonucleoprotein 70 kDa OS=Diaphorina citri OX=121845 GN=LOC103515828 PE=4 SV=1;tr|A0A3Q0J280|A0A3Q0J280_DIACI U1 small nuclear ribonucleoprotein 70 kDa OS=Diaphorina citri OX=121845 GN=LOC103513621 PE=4 SV=	2	2	2	2	6.6	45.546	14219	24544	32643	130110	15301	34095	Quantified	GO:0030619(MF:U1 snRNA binding)				PF00076(RNA recognition motif. (a.k.a. RRM, RBD, or RNP domain));PF12220(U1 small nuclear ribonucleoprotein of 70kDa MW N terminal)
A0A1S3DCD0	Nucleoporin NDC1	LOC103515929		tr|A0A1S3DCD0|A0A1S3DCD0_DIACI	tr|A0A1S3DCD0|A0A1S3DCD0_DIACI Nucleoporin NDC1 OS=Diaphorina citri OX=121845 GN=LOC103515929 PE=3 SV=2	1	1	1	1	1.3	64.113		3722.4				369.9	Identified	GO:0016021(CC:integral component of membrane)			Membrane;Multi-pass membrane protein;Nucleus membrane;Nucleus;nuclear pore complex	PF09531(Nucleoporin protein Ndc1-Nup)
A0A1S3DCD9	V-type proton ATPase subunit G	LOC103515954	FUNCTION: Catalytic subunit of the peripheral V1 complex of vacuolar ATPase (V-ATPase). V-ATPase is responsible for acidifying a variety of intracellular compartments in eukaryotic cells. {ECO:0000256|RuleBase:RU364019}.	tr|A0A1S3DCD9|A0A1S3DCD9_DIACI	tr|A0A1S3DCD9|A0A1S3DCD9_DIACI V-type proton ATPase subunit G OS=Diaphorina citri OX=121845 GN=LOC103515954 PE=3 SV=1	1	4	4	4	32.2	13.807	3747300	3687400	2480400	4518900	3404500	3246600	Quantified	GO:1902600(BP:proton transmembrane transport);GO:0016471(CC:vacuolar proton-transporting V-type ATPase complex);GO:0042626(MF:ATPase activity, coupled to transmembrane movement of substances)				PF03179(Vacuolar (H+)-ATPase G subunit)
A0A1S3DCE5	Elongation factor 1-alpha	LOC103514985	FUNCTION: This protein promotes the GTP-dependent binding of aminoacyl-tRNA to the A-site of ribosomes during protein biosynthesis. {ECO:0000256|RuleBase:RU000325}.	tr|A0A1S3DCE5|A0A1S3DCE5_DIACI;tr|Q0PWT7|Q0PWT7_DIACI	tr|A0A1S3DCE5|A0A1S3DCE5_DIACI Elongation factor 1-alpha OS=Diaphorina citri OX=121845 GN=LOC103514985 PE=3 SV=1	2	21	21	21	60.4	50.479	30359000	28595000	29765000	48375000	33228000	38524000	Quantified	GO:0005525(MF:GTP binding);GO:0003924(MF:GTPase activity);GO:0003746(MF:translation elongation factor activity)			Cytoplasm	PF03144(Elongation factor Tu domain 2);PF03143(Elongation factor Tu C-terminal domain);PF00009(Elongation factor Tu GTP binding domain)
A0A1S3DCE7	Guanine nucleotide-binding protein G(I)/G(S)/G(T) subunit beta-1 isoform X1	LOC103515883		tr|A0A1S3DCE7|A0A1S3DCE7_DIACI;tr|A0A3Q0J701|A0A3Q0J701_DIACI	tr|A0A1S3DCE7|A0A1S3DCE7_DIACI Guanine nucleotide-binding protein G(I)/G(S)/G(T) subunit beta-1 isoform X1 OS=Diaphorina citri OX=121845 GN=LOC103515883 PE=3 SV=1;tr|A0A3Q0J701|A0A3Q0J701_DIACI Guanine nucleotide-binding protein G(I)/G(S)/G(T) subunit beta	2	10	1	1	50.3	37.506	27746	39016	51466	34302	19306		Quantified	GO:0007165(BP:signal transduction)				PF00400(WD domain, G-beta repeat)
A0A1S3DCF1	Isocitrate dehydrogenase [NAD] subunit, mitochondrial	LOC103515694		tr|A0A1S3DCF1|A0A1S3DCF1_DIACI	tr|A0A1S3DCF1|A0A1S3DCF1_DIACI Isocitrate dehydrogenase [NAD] subunit, mitochondrial OS=Diaphorina citri OX=121845 GN=LOC103515694 PE=3 SV=1	1	13	13	13	45.2	33.823	16986000	14433000	13464000	14829000	21451000	17644000	Quantified	GO:0006099(BP:tricarboxylic acid cycle);GO:0005739(CC:mitochondrion);GO:0004449(MF:isocitrate dehydrogenase (NAD+) activity);GO:0000287(MF:magnesium ion binding);GO:0051287(MF:NAD binding)	K00031(NA)	ko00020(Citrate cycle (TCA cycle));ko00480(Glutathione metabolism);ko00720(Carbon fixation pathways in prokaryotes);ko04146(Peroxisome)	Mitochondrion	PF00180(Isocitrate/isopropylmalate dehydrogenase)
A0A1S3DCF4	CDP-diacylglycerol--inositol 3-phosphatidyltransferase	LOC103515790		tr|A0A1S3DCF4|A0A1S3DCF4_DIACI	tr|A0A1S3DCF4|A0A1S3DCF4_DIACI CDP-diacylglycerol--inositol 3-phosphatidyltransferase OS=Diaphorina citri OX=121845 GN=LOC103515790 PE=3 SV=1	1	1	1	1	10.9	23.815		12928	16168		16909	19948	Quantified	GO:0008654(BP:phospholipid biosynthetic process);GO:0016021(CC:integral component of membrane);GO:0003881(MF:CDP-diacylglycerol-inositol 3-phosphatidyltransferase activity)			Membrane;Multi-pass membrane protein	PF01066(CDP-alcohol phosphatidyltransferase)
A0A1S3DCH7	AP-2 complex subunit mu isoform X1	LOC103516008		tr|A0A1S3DCH7|A0A1S3DCH7_DIACI;tr|A0A3Q0J7A1|A0A3Q0J7A1_DIACI;tr|A0A3Q0J7A6|A0A3Q0J7A6_DIACI	tr|A0A1S3DCH7|A0A1S3DCH7_DIACI AP-2 complex subunit mu isoform X1 OS=Diaphorina citri OX=121845 GN=LOC103516008 PE=3 SV=1;tr|A0A3Q0J7A1|A0A3Q0J7A1_DIACI AP-2 complex subunit mu isoform X2 OS=Diaphorina citri OX=121845 GN=LOC103516008 PE=3 SV=1	3	9	9	9	36.3	50.244	219090	248540	264990	352450	235030	315520	Quantified	GO:0006886(BP:intracellular protein transport);GO:0016192(BP:vesicle-mediated transport);GO:0030131(CC:clathrin adaptor complex);GO:0008289(MF:lipid binding)			Cell membrane;Membrane;coated pit;Peripheral membrane protein;Cytoplasmic side	PF01217(Clathrin adaptor complex small chain);PF00928(Adaptor complexes medium subunit family)
A0A1S3DCH9	Small nuclear ribonucleoprotein Sm D1	LOC103515045	FUNCTION: Essential for pre-mRNA splicing. Implicated in the formation of stable, biologically active snRNP structures. {ECO:0000256|RuleBase:RU365054}.	tr|A0A1S3DCH9|A0A1S3DCH9_DIACI	tr|A0A1S3DCH9|A0A1S3DCH9_DIACI Small nuclear ribonucleoprotein Sm D1 OS=Diaphorina citri OX=121845 GN=LOC103515045 PE=3 SV=1	1	4	4	4	49.2	14.081	464130	403170	382150	853230	492380	603090	Quantified	GO:0000387(BP:spliceosomal snRNP assembly);GO:0005634(CC:nucleus)			Nucleus	PF01423(LSM domain)
A0A1S3DCL2	Protein tyrosine phosphatase type IVA 1	LOC103515892		tr|A0A1S3DCL2|A0A1S3DCL2_DIACI	tr|A0A1S3DCL2|A0A1S3DCL2_DIACI Protein tyrosine phosphatase type IVA 1 OS=Diaphorina citri OX=121845 GN=LOC103515892 PE=4 SV=1	1	4	4	4	42.9	19.941	87540	193390	149090	327810	209030	188590	Quantified	GO:0008138(MF:protein tyrosine/serine/threonine phosphatase activity)			Early endosome;Endosome	PF00782(Dual specificity phosphatase, catalytic domain)
A0A1S3DCN5	Phosphatidylinositol-binding clathrin assembly protein LAP	LOC103516095		tr|A0A1S3DCN5|A0A1S3DCN5_DIACI	tr|A0A1S3DCN5|A0A1S3DCN5_DIACI Phosphatidylinositol-binding clathrin assembly protein LAP OS=Diaphorina citri OX=121845 GN=LOC103516095 PE=3 SV=1	1	8	8	8	23.8	65.215	497030	393320	385090	397010	459150	493820	Quantified	GO:0048268(BP:clathrin coat assembly);GO:0030136(CC:clathrin-coated vesicle);GO:0005545(MF:1-phosphatidylinositol binding);GO:0030276(MF:clathrin binding)				PF07651(ANTH domain)
A0A1S3DCN8	Sodium/potassium-transporting ATPase subunit beta-like	LOC103515134		tr|A0A1S3DCN8|A0A1S3DCN8_DIACI	tr|A0A1S3DCN8|A0A1S3DCN8_DIACI Sodium/potassium-transporting ATPase subunit beta-like OS=Diaphorina citri OX=121845 GN=LOC103515134 PE=3 SV=1	1	1	1	1	10.8	13.986	510790	419960	444500	719540	439100	450260	Quantified	GO:0006813(BP:potassium ion transport);GO:0006814(BP:sodium ion transport);GO:0005890(CC:sodium:potassium-exchanging ATPase complex)			Cell membrane;Single-pass type II membrane protein	PF00287(Sodium / potassium ATPase beta chain)
A0A1S3DCQ6	26S proteasome non-ATPase regulatory subunit 10-like	LOC103516059		tr|A0A1S3DCQ6|A0A1S3DCQ6_DIACI	tr|A0A1S3DCQ6|A0A1S3DCQ6_DIACI 26S proteasome non-ATPase regulatory subunit 10-like OS=Diaphorina citri OX=121845 GN=LOC103516059 PE=4 SV=1	1	1	1	1	7.8	26.885	33541	38228	29175	16570	29001	29607	Quantified	GO:0000502(CC:proteasome complex)				PF12796(Ankyrin repeats (3 copies))
A0A1S3DCS7	RNA polymerase II transcriptional coactivator-like isoform X2	LOC103515200		tr|A0A1S3DCS7|A0A1S3DCS7_DIACI;tr|A0A1S4EIL2|A0A1S4EIL2_DIACI	tr|A0A1S3DCS7|A0A1S3DCS7_DIACI RNA polymerase II transcriptional coactivator-like isoform X2 OS=Diaphorina citri OX=121845 GN=LOC103515200 PE=3 SV=1;tr|A0A1S4EIL2|A0A1S4EIL2_DIACI RNA polymerase II transcriptional coactivator-like isoform X1 OS=Diaphorina	2	2	2	2	15.1	13.382	495540	357440	263180	176720	388800	308360	Quantified	GO:0006355(BP:regulation of transcription, DNA-templated);GO:0003677(MF:DNA binding)			Nucleus	PF02229(Transcriptional Coactivator p15 (PC4))
A0A1S3DCS9	Guanine nucleotide exchange factor MSS4	LOC103516088		tr|A0A1S3DCS9|A0A1S3DCS9_DIACI	tr|A0A1S3DCS9|A0A1S3DCS9_DIACI Guanine nucleotide exchange factor MSS4 OS=Diaphorina citri OX=121845 GN=LOC103516088 PE=4 SV=1	1	1	1	1	11.8	19.41		49433	28107		12162	17054	Quantified	GO:0007264(BP:small GTPase mediated signal transduction);GO:0005085(MF:guanyl-nucleotide exchange factor activity)				PF04421(Mss4 protein)
A0A1S3DCT4	PAT complex subunit CCDC47	LOC103515995		tr|A0A1S3DCT4|A0A1S3DCT4_DIACI	tr|A0A1S3DCT4|A0A1S3DCT4_DIACI PAT complex subunit CCDC47 OS=Diaphorina citri OX=121845 GN=LOC103515995 PE=3 SV=1	1	3	3	3	9.8	54.595	8602.5	10647	14006	47688	19541	30010	Quantified	GO:0016021(CC:integral component of membrane)			Rough endoplasmic reticulum membrane;Single-pass type I membrane protein	PF07946(Protein of unknown function (DUF1682))
A0A1S3DCT6	Uncharacterized protein LOC103516160	LOC103516160		tr|A0A1S3DCT6|A0A1S3DCT6_DIACI	tr|A0A1S3DCT6|A0A1S3DCT6_DIACI Uncharacterized protein LOC103516160 OS=Diaphorina citri OX=121845 GN=LOC103516160 PE=4 SV=2	1	1	1	1	4.2	56.729		6038.9	3370.6		2175		Quantified					PF06585(Haemolymph juvenile hormone binding protein (JHBP))
A0A1S3DCT9	Uncharacterized protein LOC103515999	LOC103515999		tr|A0A1S3DCT9|A0A1S3DCT9_DIACI	tr|A0A1S3DCT9|A0A1S3DCT9_DIACI Uncharacterized protein LOC103515999 OS=Diaphorina citri OX=121845 GN=LOC103515999 PE=4 SV=1	1	2	2	2	3.9	83.087	300840	45863	231930	94316	115670		Quantified	GO:0016021(CC:integral component of membrane)
A0A1S3DCU7	Ras-related protein Rap-2a	LOC103515243		tr|A0A1S3DCU7|A0A1S3DCU7_DIACI	tr|A0A1S3DCU7|A0A1S3DCU7_DIACI Ras-related protein Rap-2a OS=Diaphorina citri OX=121845 GN=LOC103515243 PE=4 SV=1	1	2	2	2	13	20.77	35488	51270	37822	70455	36972	54004	Quantified	GO:0007165(BP:signal transduction);GO:0016020(CC:membrane);GO:0005525(MF:GTP binding);GO:0003924(MF:GTPase activity)			Membrane;Lipid-anchor;Cytoplasmic side	PF00071(Ras family)
A0A1S3DCV6	Ribonucloprotein	LOC103516126	FUNCTION: Common component of the spliceosome and rRNA processing machinery. {ECO:0000256|RuleBase:RU366039}.	tr|A0A1S3DCV6|A0A1S3DCV6_DIACI	tr|A0A1S3DCV6|A0A1S3DCV6_DIACI Ribonucloprotein OS=Diaphorina citri OX=121845 GN=LOC103516126 PE=3 SV=1	1	2	2	2	33.6	15.151	237170	243550	142780	132440	231630	259290	Quantified	GO:0042254(BP:ribosome biogenesis);GO:0005730(CC:nucleolus);GO:1990904(CC:ribonucleoprotein complex);GO:0003723(MF:RNA binding)			Nucleus;nucleolus	PF01248(Ribosomal protein L7Ae/L30e/S12e/Gadd45 family)
A0A1S3DCW9	Uncharacterized protein LOC103515273 isoform X1	LOC103515273		tr|A0A1S3DCW9|A0A1S3DCW9_DIACI	tr|A0A1S3DCW9|A0A1S3DCW9_DIACI Uncharacterized protein LOC103515273 isoform X1 OS=Diaphorina citri OX=121845 GN=LOC103515273 PE=4 SV=1	1	6	6	6	36.4	29.397	1844100	2087600	2443100	733270	1715600	1751600	Quantified	GO:0005576(CC:extracellular region);GO:0008061(MF:chitin binding)				PF01607(Chitin binding Peritrophin-A domain)
A0A1S3DCX2	Serine/threonine-protein phosphatase 2A 65 kDa regulatory subunit A alpha isoform	LOC103516063		tr|A0A1S3DCX2|A0A1S3DCX2_DIACI;tr|A0A1S3DPZ9|A0A1S3DPZ9_DIACI	tr|A0A1S3DCX2|A0A1S3DCX2_DIACI Serine/threonine-protein phosphatase 2A 65 kDa regulatory subunit A alpha isoform OS=Diaphorina citri OX=121845 GN=LOC103516063 PE=4 SV=2	2	12	3	3	37.7	45.86	474820	630990	671090	811760	700040	564310	Quantified	GO:0005975(BP:carbohydrate metabolic process);GO:0065003(BP:protein-containing complex assembly);GO:0019888(MF:protein phosphatase regulator activity)				PF00704(Glycosyl hydrolases family 18);PF13646(HEAT repeats)
A0A1S3DCX4	Cytochrome c oxidase copper chaperone	LOC103516234		tr|A0A1S3DCX4|A0A1S3DCX4_DIACI	tr|A0A1S3DCX4|A0A1S3DCX4_DIACI Cytochrome c oxidase copper chaperone OS=Diaphorina citri OX=121845 GN=LOC103516234 PE=3 SV=1	1	1	1	1	25.6	8.4067	16277	132840	93290		125160	140880	Quantified	GO:0006825(BP:copper ion transport);GO:0005758(CC:mitochondrial intermembrane space);GO:0016531(MF:copper chaperone activity)			Mitochondrion intermembrane space	PF05051(Cytochrome C oxidase copper chaperone (COX17))
A0A1S3DCY9	NADH dehydrogenase [ubiquinone] 1 beta subcomplex subunit 6	LOC103515307		tr|A0A1S3DCY9|A0A1S3DCY9_DIACI	tr|A0A1S3DCY9|A0A1S3DCY9_DIACI NADH dehydrogenase [ubiquinone] 1 beta subcomplex subunit 6 OS=Diaphorina citri OX=121845 GN=LOC103515307 PE=3 SV=1	1	10	10	10	57.5	20.181	4756600	4432900	4294800	10214000	6676200	6242200	Quantified	GO:0006120(BP:mitochondrial electron transport, NADH to ubiquinone);GO:0005747(CC:mitochondrial respiratory chain complex I)				PF09782(NADH:ubiquinone oxidoreductase, NDUFB6/B17 subunit)
A0A1S3DCZ2	Uncharacterized protein LOC103516086	LOC103516086		tr|A0A1S3DCZ2|A0A1S3DCZ2_DIACI	tr|A0A1S3DCZ2|A0A1S3DCZ2_DIACI Uncharacterized protein LOC103516086 OS=Diaphorina citri OX=121845 GN=LOC103516086 PE=4 SV=1	1	2	2	2	7.5	34.736	57889	25599	19829		16525	23240	Quantified	GO:0003676(MF:nucleic acid binding)
A0A1S3DCZ5	Homeobox protein slou-like	LOC103516006		tr|A0A1S3DCZ5|A0A1S3DCZ5_DIACI	tr|A0A1S3DCZ5|A0A1S3DCZ5_DIACI Homeobox protein slou-like OS=Diaphorina citri OX=121845 GN=LOC103516006 PE=4 SV=2	1	2	2	2	10.7	33.308	99354	118950	80420	92893	95223	85607	Quantified	GO:0006355(BP:regulation of transcription, DNA-templated);GO:0005634(CC:nucleus);GO:0003824(MF:catalytic activity);GO:0043565(MF:sequence-specific DNA binding)			Nucleus	PF00046(Homeobox domain)
A0A1S3DCZ7	Prefoldin subunit 4	LOC103516090	FUNCTION: Binds specifically to cytosolic chaperonin (c-CPN) and transfers target proteins to it. Binds to nascent polypeptide chain and promotes folding in an environment in which there are many competing pathways for nonnative proteins. {ECO:0000256|PIRNR:PIRNR016477}.	tr|A0A1S3DCZ7|A0A1S3DCZ7_DIACI	tr|A0A1S3DCZ7|A0A1S3DCZ7_DIACI Prefoldin subunit 4 OS=Diaphorina citri OX=121845 GN=LOC103516090 PE=3 SV=1	1	2	2	2	23.3	15.466	179020	31461	138880	68792	105890	69581	Quantified	GO:0006457(BP:protein folding);GO:0016272(CC:prefoldin complex);GO:0051082(MF:unfolded protein binding)				PF01920(Prefoldin subunit)
A0A1S3DD16	Cytosolic Fe-S cluster assembly factor NUBP2 homolog	LOC103516114		tr|A0A1S3DD16|A0A1S3DD16_DIACI;tr|A0A1S3DD11|A0A1S3DD11_DIACI	tr|A0A1S3DD16|A0A1S3DD16_DIACI Cytosolic Fe-S cluster assembly factor NUBP2 homolog OS=Diaphorina citri OX=121845 GN=LOC103516114 PE=4 SV=1;tr|A0A1S3DD11|A0A1S3DD11_DIACI Cytosolic Fe-S cluster assembly factor NUBP2 homolog OS=Diaphorina citri OX=121845 GN	2	2	2	2	16.4	23.714	19747	48459	18492	46204	9911.3	14166	Quantified	GO:0005524(MF:ATP binding)				PF10609(NUBPL iron-transfer P-loop NTPase)
A0A1S3DD20	Leukotriene A-4 hydrolase-like	LOC103516231		tr|A0A1S3DD20|A0A1S3DD20_DIACI	tr|A0A1S3DD20|A0A1S3DD20_DIACI Leukotriene A-4 hydrolase-like OS=Diaphorina citri OX=121845 GN=LOC103516231 PE=3 SV=1	1	7	5	5	18.8	57.891	260730	274420	245490	273470	235420	273620	Quantified	GO:0008237(MF:metallopeptidase activity);GO:0008270(MF:zinc ion binding)			Cell membrane;Lipid-anchor;GPI-anchor;Membrane	PF09127(Leukotriene A4 hydrolase, C-terminal);PF01433(Peptidase family M1 domain)
A0A1S3DD26	Vacuolar protein-sorting-associated protein 25	LOC103516058		tr|A0A1S3DD26|A0A1S3DD26_DIACI	tr|A0A1S3DD26|A0A1S3DD26_DIACI Vacuolar protein-sorting-associated protein 25 OS=Diaphorina citri OX=121845 GN=LOC103516058 PE=3 SV=1	1	3	3	3	25	20.262	73323	88830	123360	103260	23030	83037	Quantified	GO:0071985(BP:multivesicular body sorting pathway);GO:0000814(CC:ESCRT II complex)				PF05871(ESCRT-II complex subunit)
A0A1S3DD27	Vesicle-associated membrane protein-associated protein A isoform X1	LOC103516127		tr|A0A1S3DD27|A0A1S3DD27_DIACI;tr|A0A1S4EK08|A0A1S4EK08_DIACI;tr|A0A1S3DCX1|A0A1S3DCX1_DIACI;tr|A0A1S3DCS1|A0A1S3DCS1_DIACI	tr|A0A1S3DD27|A0A1S3DD27_DIACI Vesicle-associated membrane protein-associated protein A isoform X1 OS=Diaphorina citri OX=121845 GN=LOC103516127 PE=4 SV=1;tr|A0A1S4EK08|A0A1S4EK08_DIACI Vesicle-associated membrane protein-associated protein A isoform X4 OS	4	5	5	5	45.8	17.543	585740	559040	845520	381520	423350	537210	Quantified	GO:0070972(BP:protein localization to endoplasmic reticulum);GO:0005789(CC:endoplasmic reticulum membrane);GO:0016021(CC:integral component of membrane);GO:0033149(MF:FFAT motif binding)
A0A1S3DD29	Uncharacterized protein LOC103515374 isoform X1	LOC103515374		tr|A0A1S3DD29|A0A1S3DD29_DIACI	tr|A0A1S3DD29|A0A1S3DD29_DIACI Uncharacterized protein LOC103515374 isoform X1 OS=Diaphorina citri OX=121845 GN=LOC103515374 PE=4 SV=1	1	7	7	7	39.1	31.082	704260	655550	432340	819750	433570	648400	Quantified
A0A1S3DD44	Ras-related protein Rab-8B isoform X1	LOC103515406		tr|A0A1S3DD44|A0A1S3DD44_DIACI	tr|A0A1S3DD44|A0A1S3DD44_DIACI Ras-related protein Rab-8B isoform X1 OS=Diaphorina citri OX=121845 GN=LOC103515406 PE=4 SV=1	1	3	1	1	35.4	14.582	4713.6	28718	35941	88805	42153	9974.1	Quantified	GO:0005525(MF:GTP binding);GO:0003924(MF:GTPase activity)				PF00071(Ras family)
A0A1S3DD67	Ribulose-phosphate 3-epimerase-like	LOC103516398		tr|A0A1S3DD67|A0A1S3DD67_DIACI	tr|A0A1S3DD67|A0A1S3DD67_DIACI Ribulose-phosphate 3-epimerase-like OS=Diaphorina citri OX=121845 GN=LOC103516398 PE=4 SV=1	1	2	1	1	41.5	8.9472	1987			84532	456.21	35491	Quantified	GO:0005975(BP:carbohydrate metabolic process);GO:0016857(MF:racemase and epimerase activity, acting on carbohydrates and derivatives)				PF00834(Ribulose-phosphate 3 epimerase family)
A0A1S3DD71	Cytochrome P450 6k1-like isoform X1	LOC103516112		tr|A0A1S3DD71|A0A1S3DD71_DIACI;tr|A0A1S3DEB7|A0A1S3DEB7_DIACI	tr|A0A1S3DD71|A0A1S3DD71_DIACI Cytochrome P450 6k1-like isoform X1 OS=Diaphorina citri OX=121845 GN=LOC103516112 PE=3 SV=1;tr|A0A1S3DEB7|A0A1S3DEB7_DIACI Cytochrome P450 6k1-like isoform X2 OS=Diaphorina citri OX=121845 GN=LOC103516112 PE=3 SV=1	2	5	4	4	13.6	58.11	43351	48541	44101	156790	99423	107710	Quantified	GO:0020037(MF:heme binding);GO:0005506(MF:iron ion binding);GO:0004497(MF:monooxygenase activity);GO:0016705(MF:oxidoreductase activity, acting on paired donors, with incorporation or reduction of molecular oxygen)				PF00067(Cytochrome P450)
A0A1S3DD72	Cuticle protein 7-like	LOC103516204		tr|A0A1S3DD72|A0A1S3DD72_DIACI;tr|A0A1S3DF57|A0A1S3DF57_DIACI;tr|A0A1S3DQD8|A0A1S3DQD8_DIACI	tr|A0A1S3DD72|A0A1S3DD72_DIACI Cuticle protein 7-like OS=Diaphorina citri OX=121845 GN=LOC103516204 PE=4 SV=1;tr|A0A1S3DF57|A0A1S3DF57_DIACI Cuticle protein 7-like OS=Diaphorina citri OX=121845 GN=LOC103516565 PE=4 SV=1;tr|A0A1S3DQD8|A0A1S3DQD8_DIACI Cutic	3	4	4	2	30.2	18.273	403190	379350	240650	387150	211820	211810	Quantified	GO:0042302(MF:structural constituent of cuticle)				PF00379(Insect cuticle protein)
A0A1S3DD83	F-actin-capping protein subunit beta	LOC103516217	FUNCTION: F-actin-capping proteins bind in a Ca(2+)-independent manner to the fast growing ends of actin filaments (barbed end) thereby blocking the exchange of subunits at these ends. Unlike other capping proteins (such as gelsolin and severin), these proteins do not sever actin filaments. {ECO:0000256|RuleBase:RU365078, ECO:0000256|SAAS:SAAS01187389}.	tr|A0A1S3DD83|A0A1S3DD83_DIACI	tr|A0A1S3DD83|A0A1S3DD83_DIACI F-actin-capping protein subunit beta OS=Diaphorina citri OX=121845 GN=LOC103516217 PE=3 SV=1	1	10	10	10	52	31.12	759810	417050	548630	39207	856200	604890	Quantified	GO:0030036(BP:actin cytoskeleton organization);GO:0051016(BP:barbed-end actin filament capping);GO:0005737(CC:cytoplasm);GO:0008290(CC:F-actin capping protein complex);GO:0003779(MF:actin binding)			Cytoplasm;cytoskeleton	PF01115(F-actin capping protein, beta subunit)
A0A1S3DD98	Spectrin alpha chain	LOC103516242		tr|A0A1S3DD98|A0A1S3DD98_DIACI;tr|A0A3Q0J7P5|A0A3Q0J7P5_DIACI;tr|A0A1S3DGP9|A0A1S3DGP9_DIACI;tr|A0A1S3DCX8|A0A1S3DCX8_DIACI;tr|A0A3Q0J7S0|A0A3Q0J7S0_DIACI	tr|A0A1S3DD98|A0A1S3DD98_DIACI Spectrin alpha chain OS=Diaphorina citri OX=121845 GN=LOC103516242 PE=3 SV=1;tr|A0A3Q0J7P5|A0A3Q0J7P5_DIACI Spectrin alpha chain-like OS=Diaphorina citri OX=121845 GN=LOC103516244 PE=4 SV=1;tr|A0A1S3DGP9|A0A1S3DGP9_DIACI Spec	5	135	135	135	66.8	278.6	35926000	29858000	27662000	31904000	30460000	31066000	Quantified	GO:0005509(MF:calcium ion binding)			Cytoplasm;cytoskeleton	PF08726(Ca2+ insensitive EF hand);PF00435(Spectrin repeat);PF00018(SH3 domain);PF13499(EF-hand domain pair)
A0A1S3DDA3	Mitochondrial fission 1 protein	LOC103516148	FUNCTION: Involved in the fragmentation of the mitochondrial network and its perinuclear clustering. {ECO:0000256|PIRNR:PIRNR008835}.	tr|A0A1S3DDA3|A0A1S3DDA3_DIACI;tr|A0A3Q0JCH8|A0A3Q0JCH8_DIACI;tr|A0A1S3DCX6|A0A1S3DCX6_DIACI	tr|A0A1S3DDA3|A0A1S3DDA3_DIACI Mitochondrial fission 1 protein OS=Diaphorina citri OX=121845 GN=LOC103516148 PE=3 SV=1;tr|A0A3Q0JCH8|A0A3Q0JCH8_DIACI Mitochondrial fission 1 protein OS=Diaphorina citri OX=121845 GN=LOC103516148 PE=3 SV=1;tr|A0A1S3DCX6|A0A1	3	4	4	4	36.2	18.063	252150	355860	368070	552180	372920	393910	Quantified	GO:0000266(BP:mitochondrial fission);GO:0016021(CC:integral component of membrane);GO:0005741(CC:mitochondrial outer membrane)			Membrane;Single-pass membrane protein;Mitochondrion outer membrane	PF14853(Fis1 C-terminal tetratricopeptide repeat);PF14852(Fis1 N-terminal tetratricopeptide repeat)
A0A3Q0J7R6	28S ribosomal protein S9, mitochondrial isoform X2	LOC103516260		tr|A0A3Q0J7R6|A0A3Q0J7R6_DIACI;tr|A0A1S3DDA8|A0A1S3DDA8_DIACI;tr|A0A1S3DKL3|A0A1S3DKL3_DIACI;tr|A0A1S3DRQ2|A0A1S3DRQ2_DIACI	tr|A0A3Q0J7R6|A0A3Q0J7R6_DIACI 28S ribosomal protein S9, mitochondrial isoform X2 OS=Diaphorina citri OX=121845 GN=LOC103516260 PE=4 SV=1;tr|A0A1S3DDA8|A0A1S3DDA8_DIACI 28S ribosomal protein S9, mitochondrial isoform X1 OS=Diaphorina citri OX=121845 GN=LOC	4	4	4	4	15	47.147	45442	59590	83589	22455	105210	80321	Quantified	GO:0006412(BP:translation);GO:0005840(CC:ribosome);GO:0003735(MF:structural constituent of ribosome)	K02996(NA)	ko03010(Ribosome)		PF00380(Ribosomal protein S9/S16)
Q0PXZ3	Large ribosomal subunit protein eL34	LOC103515547		tr|Q0PXZ3|Q0PXZ3_DIACI;tr|A0A1S3DDC4|A0A1S3DDC4_DIACI	tr|Q0PXZ3|Q0PXZ3_DIACI Large ribosomal subunit protein eL34 OS=Diaphorina citri OX=121845 GN=LOC103515547 PE=2 SV=1;tr|A0A1S3DDC4|A0A1S3DDC4_DIACI Large ribosomal subunit protein eL34 OS=Diaphorina citri OX=121845 GN=LOC103515547 PE=3 SV=1	2	2	2	2	12.6	13.904	671750	588430	354800	540560	497080	644280	Quantified	GO:0006412(BP:translation);GO:0005840(CC:ribosome);GO:0003735(MF:structural constituent of ribosome)				PF01199(Ribosomal protein L34e)
A0A1S4EJR7	Elongation factor 1-gamma isoform X1	LOC103515599		tr|A0A1S4EJR7|A0A1S4EJR7_DIACI;tr|A0A1S3DDF0|A0A1S3DDF0_DIACI	tr|A0A1S4EJR7|A0A1S4EJR7_DIACI Elongation factor 1-gamma isoform X1 OS=Diaphorina citri OX=121845 GN=LOC103515599 PE=4 SV=1;tr|A0A1S3DDF0|A0A1S3DDF0_DIACI Elongation factor 1-gamma isoform X2 OS=Diaphorina citri OX=121845 GN=LOC103515599 PE=4 SV=1	2	16	16	4	51.8	48.819	2676000	3011100	2666800	5955500	3245100	4126900	Quantified	GO:0003746(MF:translation elongation factor activity)				PF00647(Elongation factor 1 gamma, conserved domain);PF02798(Glutathione S-transferase, N-terminal domain);PF00043(Glutathione S-transferase, C-terminal domain)
A0A1S3DDF6	Circadian clock-controlled protein-like	LOC103515609		tr|A0A1S3DDF6|A0A1S3DDF6_DIACI	tr|A0A1S3DDF6|A0A1S3DDF6_DIACI Circadian clock-controlled protein-like OS=Diaphorina citri OX=121845 GN=LOC103515609 PE=4 SV=1	1	2	2	2	9	34.439	32531	26180	72211	17958	11872	22563	Quantified					PF06585(Haemolymph juvenile hormone binding protein (JHBP))
A0A1S3DDH8	Protein SEC13 homolog isoform X2	LOC103516503		tr|A0A1S3DDH8|A0A1S3DDH8_DIACI;tr|A0A1S3DDV7|A0A1S3DDV7_DIACI	tr|A0A1S3DDH8|A0A1S3DDH8_DIACI Protein SEC13 homolog isoform X2 OS=Diaphorina citri OX=121845 GN=LOC103516503 PE=3 SV=1;tr|A0A1S3DDV7|A0A1S3DDV7_DIACI Protein SEC13 homolog isoform X1 OS=Diaphorina citri OX=121845 GN=LOC103516503 PE=3 SV=1	2	2	2	2	8.5	35.569	65012	36877	55763	87589	23978	19470	Quantified	GO:0090114(BP:COPII-coated vesicle budding);GO:1904263(BP:positive regulation of TORC1 signaling);GO:0015031(BP:protein transport);GO:0030127(CC:COPII vesicle coat);GO:0000139(CC:Golgi membrane);GO:0005198(MF:structural molecule activity)				PF00400(WD domain, G-beta repeat)
A0A1S3DDI6	Cuticle protein 7-like	LOC103515658		tr|A0A1S3DDI6|A0A1S3DDI6_DIACI	tr|A0A1S3DDI6|A0A1S3DDI6_DIACI Cuticle protein 7-like OS=Diaphorina citri OX=121845 GN=LOC103515658 PE=4 SV=1	1	5	5	3	28.7	23.301	397960	465860	311470	207720	267410	243900	Quantified	GO:0042302(MF:structural constituent of cuticle)				PF00379(Insect cuticle protein)
A0A1S3DDI9	Cytochrome c oxidase subunit 6C	LOC103516517		tr|A0A1S3DDI9|A0A1S3DDI9_DIACI	tr|A0A1S3DDI9|A0A1S3DDI9_DIACI Cytochrome c oxidase subunit 6C OS=Diaphorina citri OX=121845 GN=LOC103516517 PE=3 SV=1	1	5	5	5	55	8.9294	1643300	1541100	1439200	2785200	2010600	2004600	Quantified	GO:0016021(CC:integral component of membrane)				PF02937(Cytochrome c oxidase subunit VIc)
A0A1S3DDJ3	RNA helicase	LOC103516592		tr|A0A1S3DDJ3|A0A1S3DDJ3_DIACI;tr|A0A3Q0J8F2|A0A3Q0J8F2_DIACI	tr|A0A1S3DDJ3|A0A1S3DDJ3_DIACI RNA helicase OS=Diaphorina citri OX=121845 GN=LOC103516592 PE=3 SV=1;tr|A0A3Q0J8F2|A0A3Q0J8F2_DIACI RNA helicase OS=Diaphorina citri OX=121845 GN=LOC103516602 PE=3 SV=1	2	6	6	6	18.6	59.203	300990	287960	183300	411890	292640	353090	Quantified	GO:0005524(MF:ATP binding);GO:0004386(MF:helicase activity);GO:0003676(MF:nucleic acid binding)				PF00270(DEAD/DEAH box helicase);PF00271(Helicase conserved C-terminal domain)
A0A1S3DDJ6	Uncharacterized protein LOC103515675	LOC103515675		tr|A0A1S3DDJ6|A0A1S3DDJ6_DIACI	tr|A0A1S3DDJ6|A0A1S3DDJ6_DIACI Uncharacterized protein LOC103515675 OS=Diaphorina citri OX=121845 GN=LOC103515675 PE=4 SV=1	1	1	1	1	7.2	30.524	29658	8820		83224	11600	31158	Quantified
A0A1S3DDL2	ATPase N2B isoform X1	LOC103516624		tr|A0A1S3DDL2|A0A1S3DDL2_DIACI	tr|A0A1S3DDL2|A0A1S3DDL2_DIACI ATPase N2B isoform X1 OS=Diaphorina citri OX=121845 GN=LOC103516624 PE=3 SV=2	1	6	6	6	18.8	50.844	47924	180550	109540	196320	94383	106390	Quantified	GO:0005524(MF:ATP binding)				PF03969(AFG1-like ATPase)
A0A1S3DDL3	Uncharacterized protein LOC103515697	LOC103515697		tr|A0A1S3DDL3|A0A1S3DDL3_DIACI;tr|A0A1S3DMB6|A0A1S3DMB6_DIACI;tr|A0A3Q0J6W6|A0A3Q0J6W6_DIACI	tr|A0A1S3DDL3|A0A1S3DDL3_DIACI Uncharacterized protein LOC103515697 OS=Diaphorina citri OX=121845 GN=LOC103515697 PE=4 SV=1;tr|A0A1S3DMB6|A0A1S3DMB6_DIACI Uncharacterized protein LOC103521091 OS=Diaphorina citri OX=121845 GN=LOC103521091 PE=4 SV=2;tr|A0A3Q	3	2	2	2	13.2	24.277	189410	173680	220030	404220	238400	266640	Quantified	GO:0016021(CC:integral component of membrane)				PF13903(PMP-22/EMP/MP20/Claudin tight junction)
A0A1S3DDN0	NEDD8-conjugating enzyme Ubc12	LOC103516471		tr|A0A1S3DDN0|A0A1S3DDN0_DIACI	tr|A0A1S3DDN0|A0A1S3DDN0_DIACI NEDD8-conjugating enzyme Ubc12 OS=Diaphorina citri OX=121845 GN=LOC103516471 PE=3 SV=1	1	3	3	3	20.2	20.974	218300	31915	105280	64220	115590	88780	Quantified	GO:0005524(MF:ATP binding);GO:0016740(MF:transferase activity)				PF00179(Ubiquitin-conjugating enzyme)
A0A1S3DDR6	14-3-3 protein zeta-like	LOC103516438		tr|A0A1S3DDR6|A0A1S3DDR6_DIACI	tr|A0A1S3DDR6|A0A1S3DDR6_DIACI 14-3-3 protein zeta-like OS=Diaphorina citri OX=121845 GN=LOC103516438 PE=3 SV=1	1	4	1	1	40.6	12.154	2334600	1110400	1701800	2552600	1363800	2232700	Quantified					PF00244(14-3-3 protein)
A0A1S3DE70	Coronin-1B-like isoform X1	LOC103516645		tr|A0A1S3DE70|A0A1S3DE70_DIACI;tr|A0A1S3DDT3|A0A1S3DDT3_DIACI	tr|A0A1S3DE70|A0A1S3DE70_DIACI Coronin-1B-like isoform X1 OS=Diaphorina citri OX=121845 GN=LOC103516645 PE=4 SV=1;tr|A0A1S3DDT3|A0A1S3DDT3_DIACI Coronin-1B-like isoform X2 OS=Diaphorina citri OX=121845 GN=LOC103516645 PE=4 SV=1	2	3	3	3	56	8.3787	209620	265080	277440	148500	287430	305490	Quantified	GO:0030595(BP:leukocyte chemotaxis);GO:0001845(BP:phagolysosome assembly);GO:0051015(MF:actin filament binding)				PF08953(Domain of unknown function (DUF1899))
A0A1S3DF48	Deoxyuridine 5-triphosphate nucleotidohydrolase	LOC103516550	FUNCTION: This enzyme is involved in nucleotide metabolism: it produces dUMP, the immediate precursor of thymidine nucleotides and it decreases the intracellular concentration of dUTP so that uracil cannot be incorporated into DNA. {ECO:0000256|RuleBase:RU367024}.	tr|A0A1S3DF48|A0A1S3DF48_DIACI;tr|A0A1S3DDU0|A0A1S3DDU0_DIACI	tr|A0A1S3DF48|A0A1S3DF48_DIACI Deoxyuridine 5-triphosphate nucleotidohydrolase OS=Diaphorina citri OX=121845 GN=LOC103516550 PE=3 SV=1;tr|A0A1S3DDU0|A0A1S3DDU0_DIACI Deoxyuridine 5-triphosphate nucleotidohydrolase OS=Diaphorina citri OX=121845 GN=LOC1035	2	3	3	3	27.5	16.173	68902	12234	17712	108980	101880	179720	Quantified	GO:0006226(BP:dUMP biosynthetic process);GO:0046081(BP:dUTP catabolic process);GO:0004170(MF:dUTP diphosphatase activity);GO:0000287(MF:magnesium ion binding)	K01520(NA)	ko00240(Pyrimidine metabolism);ko00983(Drug metabolism - other enzymes);ko01232(Nucleotide metabolism)		PF00692(dUTPase)
A0A1S3DDX1	Guanine nucleotide-binding protein G(I)/G(S)/G(T) subunit beta-1 isoform X2	LOC103515883		tr|A0A1S3DDX1|A0A1S3DDX1_DIACI	tr|A0A1S3DDX1|A0A1S3DDX1_DIACI Guanine nucleotide-binding protein G(I)/G(S)/G(T) subunit beta-1 isoform X2 OS=Diaphorina citri OX=121845 GN=LOC103515883 PE=3 SV=1	1	10	10	1	50	37.256	2034000	2473100	2695700	1145100	2224700	2156300	Quantified	GO:0007165(BP:signal transduction)				PF00400(WD domain, G-beta repeat)
A0A1S3DDX7	Large ribosomal subunit protein mL51	LOC103516530		tr|A0A1S3DDX7|A0A1S3DDX7_DIACI	tr|A0A1S3DDX7|A0A1S3DDX7_DIACI Large ribosomal subunit protein mL51 OS=Diaphorina citri OX=121845 GN=LOC103516530 PE=3 SV=1	1	2	2	2	16	19.663	52495	53856	72736	102530	67208	82638	Quantified	GO:0005840(CC:ribosome);GO:0003735(MF:structural constituent of ribosome)			Mitochondrion	PF10244(Mitochondrial ribosomal subunit)
A0A1S3DE08	Neprilysin-2-like	LOC103516775		tr|A0A1S3DE08|A0A1S3DE08_DIACI	tr|A0A1S3DE08|A0A1S3DE08_DIACI Neprilysin-2-like OS=Diaphorina citri OX=121845 GN=LOC103516775 PE=3 SV=1	1	18	18	11	41.2	75.002	12868000	8968600	7070400	12492000	2715800	7647300	Quantified	GO:0004222(MF:metalloendopeptidase activity)			Cell membrane;Single-pass type II membrane protein	PF05649(Peptidase family M13);PF01431(Peptidase family M13)
A0A1S3DE10	Hillarin-like	LOC103516872		tr|A0A1S3DE10|A0A1S3DE10_DIACI	tr|A0A1S3DE10|A0A1S3DE10_DIACI Hillarin-like OS=Diaphorina citri OX=121845 GN=LOC103516872 PE=4 SV=1	1	3	3	3	28.3	14.157	203820	179640	160610	238760	190330	199660	Quantified	GO:0046872(MF:metal ion binding)				PF00412(LIM domain)
A0A1S3DE13	CAP-Gly domain-containing linker protein 2	LOC103516576		tr|A0A1S3DE13|A0A1S3DE13_DIACI;tr|A0A3Q0IUY3|A0A3Q0IUY3_DIACI	tr|A0A1S3DE13|A0A1S3DE13_DIACI CAP-Gly domain-containing linker protein 2 OS=Diaphorina citri OX=121845 GN=LOC103516576 PE=4 SV=1	2	3	3	3	19.3	26.339	254880	302500	235230	84726	299510	302210	Quantified					PF01302(CAP-Gly domain)
A0A1S3DE18	G protein alpha q subunit-like	LOC103516584		tr|A0A1S3DE18|A0A1S3DE18_DIACI	tr|A0A1S3DE18|A0A1S3DE18_DIACI G protein alpha q subunit-like OS=Diaphorina citri OX=121845 GN=LOC103516584 PE=3 SV=1	1	6	6	6	34.1	32.898	607440	290800	534020	200460	328350	403300	Quantified	GO:0007186(BP:G protein-coupled receptor signaling pathway);GO:0001664(MF:G protein-coupled receptor binding);GO:0031683(MF:G-protein beta/gamma-subunit complex binding);GO:0005525(MF:GTP binding);GO:0003924(MF:GTPase activity)				PF00503(G-protein alpha subunit)
A0A1S3DPA7	COP9 signalosome complex subunit 5	LOC103522390		tr|A0A1S3DPA7|A0A1S3DPA7_DIACI;tr|A0A1S3DE22|A0A1S3DE22_DIACI	tr|A0A1S3DPA7|A0A1S3DPA7_DIACI COP9 signalosome complex subunit 5 OS=Diaphorina citri OX=121845 GN=LOC103522390 PE=3 SV=1;tr|A0A1S3DE22|A0A1S3DE22_DIACI COP9 signalosome complex subunit 5 isoform X1 OS=Diaphorina citri OX=121845 GN=LOC103516665 PE=3 SV=1	2	3	3	3	13.4	40.438	34571	48575	39007	67887	26333	47873	Quantified	GO:0008180(CC:COP9 signalosome);GO:0004222(MF:metalloendopeptidase activity)				PF01398(JAB1/Mov34/MPN/PAD-1 ubiquitin protease)
A0A1S3DE23	Ras suppressor protein 1	LOC103516589		tr|A0A1S3DE23|A0A1S3DE23_DIACI;tr|A0A1S3D4H1|A0A1S3D4H1_DIACI	tr|A0A1S3DE23|A0A1S3DE23_DIACI Ras suppressor protein 1 OS=Diaphorina citri OX=121845 GN=LOC103516589 PE=4 SV=1	2	6	6	4	41.6	28.33	306480	96864	224460	269460	87252	302680	Quantified	GO:0016491(MF:oxidoreductase activity)				PF13855(Leucine rich repeat);PF00106(short chain dehydrogenase)
A0A1S3DE55	DNA-directed RNA polymerase II subunit RPB1-like	LOC103516712		tr|A0A1S3DE55|A0A1S3DE55_DIACI;tr|A0A3Q0JDM6|A0A3Q0JDM6_DIACI	tr|A0A1S3DE55|A0A1S3DE55_DIACI DNA-directed RNA polymerase II subunit RPB1-like OS=Diaphorina citri OX=121845 GN=LOC103516712 PE=4 SV=1;tr|A0A3Q0JDM6|A0A3Q0JDM6_DIACI Ankyrin repeat and KH domain-containing protein 1 OS=Diaphorina citri OX=121845 GN=LOC103	2	1	1	1	25.5	12.127			102150			142170	Identified	GO:0003899(MF:DNA-directed 5'-3' RNA polymerase activity)
A0A1S3DEM1	Uncharacterized protein LOC103516882 isoform X1	LOC103516882		tr|A0A1S3DEM1|A0A1S3DEM1_DIACI;tr|A0A1S3DE84|A0A1S3DE84_DIACI	tr|A0A1S3DEM1|A0A1S3DEM1_DIACI Uncharacterized protein LOC103516882 isoform X1 OS=Diaphorina citri OX=121845 GN=LOC103516882 PE=4 SV=1;tr|A0A1S3DE84|A0A1S3DE84_DIACI Uncharacterized protein LOC103516882 isoform X2 OS=Diaphorina citri OX=121845 GN=LOC103516	2	3	3	3	19.3	22.367	105250	131660	130930	109880	91075	55048	Quantified	GO:0016021(CC:integral component of membrane)
A0A1S3DE99	Inactive hydroxysteroid dehydrogenase-like protein 1	LOC103516803		tr|A0A1S3DE99|A0A1S3DE99_DIACI	tr|A0A1S3DE99|A0A1S3DE99_DIACI Inactive hydroxysteroid dehydrogenase-like protein 1 OS=Diaphorina citri OX=121845 GN=LOC103516803 PE=4 SV=1	1	1	1	1	7.8	35.954		19428	55401	8250.3		38850	Quantified					PF00106(short chain dehydrogenase)
A0A1S3DEA4	NADH dehydrogenase [ubiquinone] 1 alpha subcomplex subunit 10, mitochondrial	LOC103517007	FUNCTION: Accessory subunit of the mitochondrial membrane respiratory chain NADH dehydrogenase (Complex I), that is believed not to be involved in catalysis. Complex I functions in the transfer of electrons from NADH to the respiratory chain. The immediate electron acceptor for the enzyme is believed to be ubiquinone. {ECO:0000256|PIRNR:PIRNR000543}.	tr|A0A1S3DEA4|A0A1S3DEA4_DIACI;tr|Q0PWU3|Q0PWU3_DIACI	tr|A0A1S3DEA4|A0A1S3DEA4_DIACI NADH dehydrogenase [ubiquinone] 1 alpha subcomplex subunit 10, mitochondrial OS=Diaphorina citri OX=121845 GN=LOC103517007 PE=3 SV=1;tr|Q0PWU3|Q0PWU3_DIACI NADH dehydrogenase [ubiquinone] 1 alpha subcomplex subunit 10, mitoch	2	20	20	20	64.3	46.705	4776800	4678100	5484700	10710000	7482400	7855800	Quantified	GO:0006120(BP:mitochondrial electron transport, NADH to ubiquinone);GO:0005759(CC:mitochondrial matrix);GO:0005747(CC:mitochondrial respiratory chain complex I)			Mitochondrion matrix	PF01712(Deoxynucleoside kinase)
A0A1S3DEA6	Serine/threonine-protein phosphatase 5	LOC103516927		tr|A0A1S3DEA6|A0A1S3DEA6_DIACI	tr|A0A1S3DEA6|A0A1S3DEA6_DIACI Serine/threonine-protein phosphatase 5 OS=Diaphorina citri OX=121845 GN=LOC103516927 PE=3 SV=1	1	3	3	3	8.5	69.5	74481	33741	172420	124730	51821	60609	Quantified	GO:0004721(MF:phosphoprotein phosphatase activity)				PF00149(Calcineurin-like phosphoesterase);PF08321(PPP5 TPR repeat region);PF00515(Tetratricopeptide repeat)
A0A1S3DER1	DnaJ homolog subfamily B member 3 isoform X5	LOC103517034		tr|A0A1S3DER1|A0A1S3DER1_DIACI;tr|A0A1S3DEC8|A0A1S3DEC8_DIACI;tr|A0A1S3DG23|A0A1S3DG23_DIACI;tr|A0A1S3DEI4|A0A1S3DEI4_DIACI	tr|A0A1S3DER1|A0A1S3DER1_DIACI DnaJ homolog subfamily B member 3 isoform X5 OS=Diaphorina citri OX=121845 GN=LOC103517034 PE=4 SV=1;tr|A0A1S3DEC8|A0A1S3DEC8_DIACI DnaJ homolog subfamily B member 6 isoform X3 OS=Diaphorina citri OX=121845 GN=LOC103517034 PE	4	1	1	1	6.6	24.244	13248	13508	12388	11744	12393	12295	Quantified					PF00226(DnaJ domain)
A0A1S3DEF2	Uncharacterized protein LOC103516159	LOC103516159		tr|A0A1S3DEF2|A0A1S3DEF2_DIACI	tr|A0A1S3DEF2|A0A1S3DEF2_DIACI Uncharacterized protein LOC103516159 OS=Diaphorina citri OX=121845 GN=LOC103516159 PE=4 SV=1	1	3	3	3	43.9	11.905	151690	197130	72662		328360	271100	Quantified
A0A1S3DEI2	CRAL-TRIO domain-containing protein C3H8.02	LOC103516816		tr|A0A1S3DEI2|A0A1S3DEI2_DIACI	tr|A0A1S3DEI2|A0A1S3DEI2_DIACI CRAL-TRIO domain-containing protein C3H8.02 OS=Diaphorina citri OX=121845 GN=LOC103516816 PE=4 SV=1	1	2	2	2	10.5	26.728	47174	93689	65407	106000	105870	123520	Quantified					PF00650(CRAL/TRIO domain)
A0A1S3DEJ8	Lachesin	LOC103517131		tr|A0A1S3DEJ8|A0A1S3DEJ8_DIACI	tr|A0A1S3DEJ8|A0A1S3DEJ8_DIACI Lachesin OS=Diaphorina citri OX=121845 GN=LOC103517131 PE=4 SV=1	1	12	12	12	53.1	41.065	642630	710410	905400	1201200	896830	832280	Quantified					PF07679(Immunoglobulin I-set domain);PF13927(Immunoglobulin domain)
A0A1S3DEJ9	Selenide, water dikinase isoform X1	LOC103517049		tr|A0A1S3DEJ9|A0A1S3DEJ9_DIACI	tr|A0A1S3DEJ9|A0A1S3DEJ9_DIACI Selenide, water dikinase isoform X1 OS=Diaphorina citri OX=121845 GN=LOC103517049 PE=4 SV=1	1	11	11	1	45.4	45.77	1371200	1036200	1000500	1319300	1225500	1139200	Quantified	GO:0005524(MF:ATP binding);GO:0016301(MF:kinase activity)				PF00586(AIR synthase related protein, N-terminal domain);PF02769(AIR synthase related protein, C-terminal domain)
A0A3Q0IWW8	Protein PRRC1-like	LOC103508583		tr|A0A3Q0IWW8|A0A3Q0IWW8_DIACI;tr|A0A1S3DEK0|A0A1S3DEK0_DIACI;tr|A0A3Q0J9B4|A0A3Q0J9B4_DIACI	tr|A0A3Q0IWW8|A0A3Q0IWW8_DIACI Protein PRRC1-like OS=Diaphorina citri OX=121845 GN=LOC103508583 PE=3 SV=1;tr|A0A1S3DEK0|A0A1S3DEK0_DIACI Protein PRRC1-like OS=Diaphorina citri OX=121845 GN=LOC103516963 PE=3 SV=1	3	3	3	3	23.2	23.098	108540	95532	93464	18315	3642.3	8629.6	Quantified				Golgi apparatus	PF01931(Protein of unknown function DUF84)
A0A1S3DEK1	Signal recognition particle 19 kDa protein	LOC103516245		tr|A0A1S3DEK1|A0A1S3DEK1_DIACI	tr|A0A1S3DEK1|A0A1S3DEK1_DIACI Signal recognition particle 19 kDa protein OS=Diaphorina citri OX=121845 GN=LOC103516245 PE=3 SV=1	1	3	3	3	24.3	17.07	116700	112430	76339	134180	118890	115910	Quantified	GO:0006614(BP:SRP-dependent cotranslational protein targeting to membrane);GO:0048500(CC:signal recognition particle);GO:0008312(MF:7S RNA binding)			Cytoplasm	PF01922(SRP19 protein)
A0A1S3DEK5	Uncharacterized protein LOC103516968	LOC103516968		tr|A0A1S3DEK5|A0A1S3DEK5_DIACI	tr|A0A1S3DEK5|A0A1S3DEK5_DIACI Uncharacterized protein LOC103516968 OS=Diaphorina citri OX=121845 GN=LOC103516968 PE=4 SV=1	1	3	3	3	10.1	42.108	179370	273850	195230	110790	206090	244250	Quantified
A0A1S3DEL2	alkaline phosphatase	LOC103516265		tr|A0A1S3DEL2|A0A1S3DEL2_DIACI	tr|A0A1S3DEL2|A0A1S3DEL2_DIACI alkaline phosphatase OS=Diaphorina citri OX=121845 GN=LOC103516265 PE=3 SV=1	1	22	22	22	42.7	62.786	4930000	4962000	5086300	3168300	2786700	2784400	Quantified	GO:0016791(MF:phosphatase activity)				PF00245(Alkaline phosphatase)
A0A1S3DEN4	Barrier-to-autointegration factor	LOC103517008		tr|A0A1S3DEN4|A0A1S3DEN4_DIACI	tr|A0A1S3DEN4|A0A1S3DEN4_DIACI Barrier-to-autointegration factor OS=Diaphorina citri OX=121845 GN=LOC103517008 PE=4 SV=1	1	3	3	3	55.1	10.038	401070	403690	343730	411360	358900	339110	Quantified	GO:0003677(MF:DNA binding)			Nucleus	PF02961(Barrier to autointegration factor)
A0A1S3DEP0	GTP:AMP phosphotransferase, mitochondrial	LOC103517012	FUNCTION: Involved in maintaining the homeostasis of cellular nucleotides by catalyzing the interconversion of nucleoside phosphates. Has GTP:AMP phosphotransferase and ITP:AMP phosphotransferase activities. {ECO:0000256|HAMAP-Rule:MF_03169}.	tr|A0A1S3DEP0|A0A1S3DEP0_DIACI	tr|A0A1S3DEP0|A0A1S3DEP0_DIACI GTP:AMP phosphotransferase, mitochondrial OS=Diaphorina citri OX=121845 GN=LOC103517012 PE=3 SV=1	1	10	10	10	53.5	26.113	2070400	1772400	1661800	2519600	1946700	1782700	Quantified	GO:0006172(BP:ADP biosynthetic process);GO:0046033(BP:AMP metabolic process);GO:0046039(BP:GTP metabolic process);GO:0046041(BP:ITP metabolic process);GO:0005759(CC:mitochondrial matrix);GO:0004017(MF:adenylate kinase activity);GO:0005524(MF:ATP binding);GO:0005525(MF:GTP binding);GO:0046899(MF:nucleoside triphosphate adenylate kinase activity)	K00939(NA)	ko00230(Purine metabolism);ko00730(Thiamine metabolism);ko01232(Nucleotide metabolism);ko01240(Biosynthesis of cofactors)	Mitochondrion matrix	PF00406(Adenylate kinase);PF05191(Adenylate kinase, active site lid)
A0A1S3DEP3	RNA-binding protein Rsf1 isoform X2	LOC103517111		tr|A0A1S3DEP3|A0A1S3DEP3_DIACI;tr|A0A1S3DF31|A0A1S3DF31_DIACI	tr|A0A1S3DEP3|A0A1S3DEP3_DIACI RNA-binding protein Rsf1 isoform X2 OS=Diaphorina citri OX=121845 GN=LOC103517111 PE=4 SV=1;tr|A0A1S3DF31|A0A1S3DF31_DIACI RNA-binding protein Rsf1 isoform X1 OS=Diaphorina citri OX=121845 GN=LOC103517111 PE=4 SV=1	2	2	2	2	8.8	24.096	563370	73803	11183	39873	413900	1085200	Quantified	GO:0003723(MF:RNA binding)				PF00076(RNA recognition motif. (a.k.a. RRM, RBD, or RNP domain))
A0A1S3DEQ4	Cathepsin W-like	LOC103517126		tr|A0A1S3DEQ4|A0A1S3DEQ4_DIACI	tr|A0A1S3DEQ4|A0A1S3DEQ4_DIACI Cathepsin W-like OS=Diaphorina citri OX=121845 GN=LOC103517126 PE=3 SV=1	1	4	4	3	30.3	21.182	1302800	988860	978230	3066000	1791300	2506100	Quantified	GO:0008234(MF:cysteine-type peptidase activity)				PF00112(Papain family cysteine protease)
A0A1S3DEQ5	ATP-dependent RNA helicase me31b	LOC103517033		tr|A0A1S3DEQ5|A0A1S3DEQ5_DIACI;tr|A0A3Q0JDP1|A0A3Q0JDP1_DIACI	tr|A0A1S3DEQ5|A0A1S3DEQ5_DIACI ATP-dependent RNA helicase me31b OS=Diaphorina citri OX=121845 GN=LOC103517033 PE=3 SV=1	2	20	20	20	63.4	43.591	1188600	1643400	1264300	2700100	2004700	2911800	Quantified	GO:0005524(MF:ATP binding);GO:0004386(MF:helicase activity);GO:0003676(MF:nucleic acid binding)				PF00270(DEAD/DEAH box helicase);PF00271(Helicase conserved C-terminal domain)
A0A1S3DEQ6	Toll-interacting protein B	LOC103516940		tr|A0A1S3DEQ6|A0A1S3DEQ6_DIACI	tr|A0A1S3DEQ6|A0A1S3DEQ6_DIACI Toll-interacting protein B OS=Diaphorina citri OX=121845 GN=LOC103516940 PE=3 SV=1	1	3	3	3	10.6	32.334		102140	153770	163800	35872	202260	Quantified				Cytoplasm	PF02845(CUE domain);PF00168(C2 domain)
A0A1S3DG33	Neither inactivation nor afterpotential protein C-like	LOC103517043		tr|A0A1S3DG33|A0A1S3DG33_DIACI;tr|A0A1S3DER6|A0A1S3DER6_DIACI	tr|A0A1S3DG33|A0A1S3DG33_DIACI Neither inactivation nor afterpotential protein C-like OS=Diaphorina citri OX=121845 GN=LOC103517043 PE=3 SV=1;tr|A0A1S3DER6|A0A1S3DER6_DIACI Neither inactivation nor afterpotential protein C-like OS=Diaphorina citri OX=12184	2	4	4	4	20.2	32.636	125520	152450	235480	391630	164370	365550	Quantified	GO:0016459(CC:myosin complex);GO:0003779(MF:actin binding);GO:0005524(MF:ATP binding);GO:0003774(MF:motor activity)				PF00063(Myosin head (motor domain))
A0A1S3DEU1	27 kDa glycoprotein	LOC103517073		tr|A0A1S3DEU1|A0A1S3DEU1_DIACI	tr|A0A1S3DEU1|A0A1S3DEU1_DIACI 27 kDa glycoprotein OS=Diaphorina citri OX=121845 GN=LOC103517073 PE=4 SV=1	1	5	5	5	21	27.564	113510	357880	701050	46884	326020	790200	Quantified					PF07165(Protein of unknown function (DUF1397))
[truncated: 2,535 more rows]

## Sheet: Total peptides
Sequence	Length	Missed cleavages	Mass	Proteins	Leading razor protein	Unique (Groups)	Charges	PEP	Score	Intensity	Intensity free-1	Intensity free-2	Intensity free-3	Intensity infected-1	Intensity infected-2	Intensity infected-3
[truncated: 20,181 more rows]
